# Supplementary material for: Amazonia is the primary source of Neotropical biodiversity
Source: PubMed Central journal article supplement — Proc Natl Acad Sci U S A. 2018 May 14;115(23):6034–9. doi: 10.1073/pnas.1713819115 (PMC6003360; doi:10.1073/pnas.1713819115), 2018-05-14
Supplement: pnas.1713819115.sapp.pdf [file pnas.1713819115.sapp.pdf]

## SUPPORTING INFORMATION

### **Amazonia is the primary source of Neotropical biodiversity**

Alexandre Antonelli, Alexander Zizka, Fernanda Antunes Carvalho, Ruud Scharn, Christine D. Bacon, Daniele Silvestro, Fabien L. Condamine

#### **Contents:**

Tables of Contents

Supporting Methods

Supporting Figures S1–S23

Supporting Tables S1–S10

Supporting References

| <b>Content</b>                                                                                                                                                                                                                                                                                                                                                                                                                                                                                                                                                                                       | <b>Pages:</b> |
|------------------------------------------------------------------------------------------------------------------------------------------------------------------------------------------------------------------------------------------------------------------------------------------------------------------------------------------------------------------------------------------------------------------------------------------------------------------------------------------------------------------------------------------------------------------------------------------------------|---------------|
| <b>Table of Contents</b>                                                                                                                                                                                                                                                                                                                                                                                                                                                                                                                                                                             | 1–3           |
| <b>Supporting Methods</b>                                                                                                                                                                                                                                                                                                                                                                                                                                                                                                                                                                            | 4–11          |
| <b>Supporting Figures – Legends:</b>                                                                                                                                                                                                                                                                                                                                                                                                                                                                                                                                                                 |               |
| <b>Fig. S1:</b> Number of species occurrences for each major clade analyzed, plotted per 100x100 km grid cell across the Neotropical region. The maps contain all data points from GBIF after automated cleaning, which involved several filtering steps (see text for details).                                                                                                                                                                                                                                                                                                                     | 12–17         |
| <b>Fig. S2:</b> Plots of the original phylogenies used in this study pruned to only include species occurring in the study area, with each species coded as present or absent in each Neotropical region. See references S1–S6 for the original species occurrence data sources and <a href="https://doi.org/10.5281/zenodo.1149127">https://doi.org/10.5281/zenodo.1149127</a>                                                                                                                                                                                                                      | 18–23         |
| <b>Figs. S3–S8:</b> Plots of all predominantly Neotropical subclades pruned from the original phylogenies. The area coding at the tips of the phylogenies depict current distributions, while at internodes they represent the most likely ancestral area distribution as inferred under the Dispersal-Extinction-Cladogenesis model implemented in BioGeoBEARS. Region abbreviations: a) Amazonia, b) Atlantic Forests, c) Caatinga, d) West Indies, e) Cerrado and Chaco, f) Dry Northern South America, g) Dry Western South America, h) Mesoamerica, i) Andean Grasslands, j) Patagonian Steppe. | 24–449        |
| <b>Figs. S9–S10:</b> Results of the biogeographic analyses performed under the time-stratified Dispersal-Extinction-Cladogenesis model (Table S3). These figures are equivalent to the results shown in Figs. 2 and 3, respectively; see legends for details.                                                                                                                                                                                                                                                                                                                                        | 450–451       |

|                                                                                                                                                                                                                                                                                                                                                                                                                                                     |         |
|-----------------------------------------------------------------------------------------------------------------------------------------------------------------------------------------------------------------------------------------------------------------------------------------------------------------------------------------------------------------------------------------------------------------------------------------------------|---------|
| <b>Fig. S11:</b> Number of inferred dispersal events relative to the available branch lengths through time between each pair of regions, under the time-stratified Dispersal-Extinction-Cladogenesis model. Each color represents one major clade.                                                                                                                                                                                                  | 452–461 |
| <b>Fig. S12:</b> Number of inferred dispersal events relative to the available branch lengths through time between each pair of regions, under the unconstrained Dispersal-Extinction-Cladogenesis model. Each color represents one major clade.                                                                                                                                                                                                    | 462–471 |
| <b>Fig. S13:</b> Total number of inferred dispersal events (immigration + emigration) relative to the available branch lengths through time involving each of the Neotropical regions surveyed. Each color represents one major clade.                                                                                                                                                                                                              | 472     |
| <b>Fig. S14:</b> The individual relationships between the number of dispersal events per region, and the predictors used in the multivariate mixed-effects model. The blue line shows a simple linear regression.                                                                                                                                                                                                                                   | 473–474 |
| <b>Fig. S15:</b> Relation between phylogenetic sampling and branch time per region and clade. Colored lines show simple linear regression smoothers per clade. The black line shows a simple linear regression for the overall model.                                                                                                                                                                                                               | 475     |
| <b>Fig. S16:</b> Relation between phylogenetic sampling and number of occurrence records per area and clade. Colored lines show individual simple linear regressions, black line shows simple overall linear regression.                                                                                                                                                                                                                            | 476     |
| <b>Fig. S17:</b> Relation between emigration events and phylogenetic sampling for each study clade with sufficient data. The colored lines are individual simple linear regression smoothers.                                                                                                                                                                                                                                                       | 477     |
| <b>Fig. S18:</b> Relation between emigration events and phylogenetic sampling from a simple overall linear regression across all study clades with sufficient data.                                                                                                                                                                                                                                                                                 | 478     |
| <b>Fig. S19:</b> Relation between emigration events and phylogenetic sampling. Colored lines show partial response for the four study clades with sufficient data.                                                                                                                                                                                                                                                                                  | 479     |
| <b>Fig. S20:</b> Fig. S20: Assessment of the altitudinal range comprised within the “Andean grasslands” region used in our analysis. The assessment was made by super-imposing the limits of this region on a topographic map obtained from WorldClim ( <a href="http://www.worldclim.org">www.worldclim.org</a> ). Altitudes are provided as meters above sea level.                                                                               | 480     |
| <b>Fig. S21:</b> Expert-defined area classification with simplified regions combining both biome borders and geological history, and the resulting cross-regional dispersal patterns inferred from the biogeographic analysis of all taxa surveyed.                                                                                                                                                                                                 | 481     |
| <b>Fig. S22:</b> Modifications of the biome and ecoregion classification by Olson <i>et al.</i> , 2001 into the region delineation applied in this study. The numbers represent the key differences between these classifications, with a simplification of 1) Mesoamerica, 2) the West Indies, and 4) the Cerrado and Chaco region; and a split of the disjunctly distributed biomes in 3) Dry Northern South America and 5) the Atlantic Forests. | 482     |
| <b>Fig. S23:</b> Evaluation of the impact of different filtering thresholds for species occurrences on the codification of species as present or absent from each Neotropical region. The plots show the effects of filtering on the classification accuracy for two major clades, where independent distribution data was available (frogs and mammals). See text for details.                                                                     | 483     |

| <b>Supporting Tables – Legends:</b>                                                                                                                                                                                          |         |
|------------------------------------------------------------------------------------------------------------------------------------------------------------------------------------------------------------------------------|---------|
| <b>Table S1.</b> Number of occurrence records per region, after the automated data cleaning. Note the low sampling in the Caatinga.                                                                                          | 484     |
| <b>Table S2.</b> Basic descriptors of the clades analysed in the biogeographic analyses (clade identification number, major clade, number of tips, root age, number of species sampled in each region, and genera included). | 485–490 |
| <b>Table S3.</b> Paleogeographic model used for the time-stratified biogeographic analyses implemented in the dispersal–extinction–cladogenesis (DEC) model.                                                                 | 491–496 |
| <b>Table S4.</b> Number of dispersal events per region and clade, sorted by decreasing order of total number of events.                                                                                                      | 497     |
| <b>Table S5.</b> Number of dispersal events per region and clade, sorted by sink area and in decreasing order of total number of events.                                                                                     | 498–499 |
| <b>Table S6.</b> Number of dispersal events per region and clade, sorted by source area and in decreasing order of total number of events.                                                                                   | 500–501 |
| <b>Table S7.</b> Residuals from the multiple predictor analysis on the effect of dispersal events, for each of the clades and regions included in the model.                                                                 | 502     |
| <b>Table S8.</b> Descriptive statistics of the multiple predictor model on the effect of dispersal events.                                                                                                                   | 503     |
| <b>Table S9.</b> Statistics on the data gathered for all taxa analyzed and their sampling in the phylogenies.                                                                                                                | 504     |
| <b>Table S10.</b> Pearsons correlation of predictor variables for the multivariate regression model on number of shifts per region.                                                                                          | 505     |
| <b>Supporting References</b>                                                                                                                                                                                                 | 506–508 |

## Supporting Methods

*Neotropical regions.* We focused our analyses on the Neotropical realm (sometimes termed region) as defined by Morrone (7) along the northern and southern limits (ranging from northern Mexico to central Argentina) and including the whole Caribbean. Within the Neotropics, we then defined operational units for the subsequent biogeographic analyses. There is no consensus on how such regions should be defined, with sometimes large discrepancies between expert-based and data-driven schemes (8), as well as differences in the number and limits of biogeographic regions (bioregions) based on the same data but derived from different methods (9). In addition, there is probably no ‘universal’ set of bioregions that may be meaningful for ecologically and biologically disparate taxa (10, 11). We aimed at producing an adequate balance between biological relevance (reflecting major ecosystems), geological history, geographic separation, and an adequate number of regions in relation to the data and methodology available. We therefore departed from the terrestrial ecoregions and biomes proposed by Olson, *et al.* (12), which have been adopted by the World Wildlife Fund (WWF) and are widely used in ecology and biogeography. We reduced the number of biomes (Fig. S22) due to limitations in ancestral range estimation, in order to keep a reasonable number of species in the phylogenies for each region, and to reduce the risk of erroneous geographic coding of species into each region (e.g. due to the lack of georeferenced records in small ecoregions). In contrast, we split geographically disjunct biomes when separated by long distances, such as the dry regions of northern South America and the Cerrado and Chaco (currently separated by Amazonia), and the Atlantic Forests and Amazonia (separated by the South American Dry Diagonal) (13). Our primary classification includes 10 regions (Fig. 1). In order to test the robustness of our analyses to this classification, in particular how the broad definition of Amazonia by Olson, *et al.* (12) could affect the inference of dispersal events between Amazonia and Mesoamerica rather than between the Chocó and Mesoamerica, we also performed inferences based on a simpler, expert-based classification (Fig. S21).

*Clades surveyed and species occurrences.* We investigated the biogeographic history of two groups of plants (angiosperms and ferns) and four groups of vertebrates (birds, frogs, mammals, and squamates). We chose taxonomic groups for which large, relatively well-sampled time-calibrated phylogenetic trees were available. We downloaded occurrence records for all species from the Global Biodiversity Information Facility (Supporting References S1–S6). We only obtained georeferenced records and used the following filters: Scientific names (Pteridophyta,

Magnoliophyta, Anura, Squamata, Aves, Mammalia), location (a rectangle around Mesoamerica and South America, from c. 59° S and 125° W to 35° N and 25° W), and basis of records (specimens, literature occurrences). We only used data with no known coordinate issues and used the CleanCoordinates function of the package SpeciesGeoCoder v.1.8 (14) in R (15) for further automated cleaning of the occurrence records. We excluded records that were identified as invalid, containing plain zeros, in a rectangle of 0.2 degrees around capital centroids, and 0.1 degrees around country and province centroids, following Maldonado, *et al.* (16). We rounded coordinates to the fifth decimal. For the angiosperm dataset, we also conducted a taxonomic cleaning due to the large number of synonyms and subspecies ranks in this group. We excluded records of species only identified to genus level, excluded hybrids, and merged intraspecific ranks to species level. We used the Taxonomic Name Resolution Service (17) to merge known synonyms under accepted names and to exclude records with invalid or illegitimate names and those with unknown taxonomic status, keeping only those records that could be unambiguously matched to an accepted name.

We then limited the cleaned dataset to occurrence records within the Neotropics and used it to classify each species as present or absent in each of our studied regions using SpeciesGeoCoder. We only recognized a species as present in a region when at least 5% of all its occurrence records fell in the region, in order to minimize the effect of erroneous species identifications or georeferencing, and to decrease the occurrence of marginal distributions and geographic outliers. We assessed the impact of multiple thresholds on the species-to-region-classification with independent data on species ranges provided by the International Union for Conservation of Nature (IUCN; [www.iucn.org](http://www.iucn.org)), using frogs and mammals as test taxa. For this purpose, we performed a second region coding, classifying species as present in our study regions if their IUCN range intersected with the respective region. We then compared all presence and absence classification with our original classification based on GBIF data, using different filter thresholds starting from a filter of 0% exclusion (a species is coded as present if there is one or more occurrences in a region) to 50%, with multiple intermediate intervals. We then calculated the false positive and false negative rates in region classification for those species present in both datasets (Fig. S23). We did not impose an absolute minimum number of occurrences because of the low density of records for several groups, in particular plants where approximately 30% of all Neotropical species only have two or less georeferenced records (18).

*Phylogenies.* We retrieved large-scale time-calibrated phylogenies for all study groups available during the data compilation phase of this study. For ferns, we used the phylogeny of Lehtonen *et al.* (19), which includes 1,116 species representing over one-fifth of the extant global fern diversity. For angiosperms, we used the phylogeny of Zanne, *et al.* (20), which is the largest phylogeny of land plants published so far with 32,233 species (12.5% of the total diversity). For amphibians, we used the phylogeny of Pyron and Wiens (21), which includes 3,309 species, corresponding to about 43.2% of the known extant species (22). For squamates (lizards, snakes, and amphisbaenians or "worm lizards") we used the phylogeny of Pyron, Burbrink and Wiens (23), which includes 4,161 species representing all currently recognized families and subfamilies and 42.2% of the known species. For birds, we used the phylogeny compiled by Jetz, Thomas, Joy and Mooers (24), which includes 89.9% of all extant species. For mammals, we used the phylogeny of Rolland, Condamine, Jiguet and Morlon (25) which is based on the trees compiled by Kuhn, Mooers and Givnish (26), Fritz, Bininda-Emonds and Purvis (27), and Bininda-Emonds, *et al.* (28). This phylogeny accounts for 92.2% of all known extant mammal species (25). We only included species present in these phylogenies in the biogeographic analyses.

We used the CladeByTrait function now included in SpeciesGeoCoder v2 to extract predominantly Neotropical clades from the original phylogenies retrieved. This was necessary to limit the results to the study region and to exclude potential dispersal events from other regions outside the Neotropics. We defined the study clades to a minimum size of 9 species and a maximum size of 100 species (larger clades might have reduced the sample size of our dispersal models). We applied a monophyly threshold of 0.15, meaning that at least 85% of the species in the clade needed to occur within the study region. A summary of the number of species included in different steps of this analytical pipeline is provided in Table S9.

*Dispersal events through time.* Here we use the terms ‘migration’ and ‘dispersal’ interchangeably in a biogeographic context, meaning long-lasting establishment in a new region rather than e.g. annual bird migrations. We do not attempt to differentiate between vicariance and long-distance dispersal events, since this is notoriously difficult, and our goal here is to estimate when lineages entered different regions regardless of the underlying process.

We relied on the dispersal-extinction-cladogenesis (DEC) model (29) implemented in the R-package BioGeoBEARS (30) for inferring geographic range evolution of lineages. Although BioGeoBEARS allows the use of an extra parameter (“j”) for jump dispersal events at nodes, we considered the original DEC model to be more suitable for the predominantly

continental settings of the Neotropics. We developed two sets of analyses: one in which biotic connectivity among all regions was allowed at any point in time, and one in which we modelled connectivity based on current paleogeographic and geological evidence on the existence, position, and extent of each region (Table S3). We consider these two sets of analyses complementary: the unconstrained model carries fewer assumptions, thus decreasing the risk of manually influencing the results; while the time-stratified model takes into account the fact that some regions were not always available for migrating lineages at all times.

Analyses were run on all Neotropical clades identified to reconstruct shifts between regions in 5-million-year time bins; finer intervals would have increased precision but reduced power. To define a dispersal event between any pair of regions, we extracted the state with the highest log-likelihood at the beginning and end of each branch. Since we did not impose any particular order of dispersal routes, our methodology should avoid counting dispersal events ‘passing through’, but not remaining in intermediate regions. Widespread ancestral reconstructions and extant distributions were also included in the calculations.

We computed the absolute number of dispersal events through time by extracting the regions and ages of all nodes from each phylogeny. The number of branches and total amount of branch lengths in any phylogeny of extant species increase with time, potentially increasing the number of dispersal events towards the present even under a constant dispersal rate (31). We therefore also calculated relative numbers of dispersal events by dividing absolute numbers by the total length of all branches within each time bin (32, 33).

Dispersal events between regions could involve shifts in major biome types, shifts into another region within the same biome type, or both. We made an approximate estimation of each scenario by first classifying all regions in our biogeographic analyses into three major categories of biomes: ‘Open/Dry’, ‘Forested/Wet’, or ‘Mixed’ (Fig. 1, see color legend). We then scored all dispersal events between each pair of regions as either involving *shifts in region and major biome type* (between ‘Open/Dry’ and ‘Forested/Wet’ or vice-versa), or *region-only shifts* (staying within ‘Open/Dry’ or within ‘Forested/Wet’ biomes). Since we could not confidently determine the nature of shifts into or out of the ‘Mixed’ regions, we coded those as *ambiguous*. The dispersal categorizations are provided in Table S6.

*Predictors of emigration and immigration.* We tested the dependence of the number of dispersal events estimated for each region on six predictor variables related to biotic and abiotic features of the regions defined, as well as on phylogenetic sampling intensity. As abiotic predictors, we included current area and perimeter (calculated from the region’s polygons), and current

geographic isolation (calculated as median distance of the region's centroid to all other centroids). As biotic predictors, we calculated the total time that lineages spent in each region. This was estimated as the total branch length per region, using stochastic character mapping {Huelsenbeck, 2003 #3405} for each phylogeny in each region, based on the transition matrix with dispersal and extinction rates as estimated by BioBeoBEARS (30). To evaluate the possible effect of sampling biases, we also computed the total number of occurrence records per region, and computed a proxy for phylogenetic sampling by calculating the fraction of species sampled out of all species occurring in a region included in our analyses. This total species richness was approximated by the total number of species in the cleaned GBIF datasets. We transformed the response and all predictor variables using a log transformation ( $\log(x+1)$ ) for constant residual variance and scaled all predictors to zero mean and zero variance for comparability among coefficients.

We tested the covariance of the predictors using the Variance Inflation Factor and Pearson correlations. The number of occurrence records and the total branch time were highly correlated (Pearson correlation = 0.8; Table S10), and we thus only used one of them in the models (branch lengths, since we considered them more biologically relevant). We fit two linear mixed-effect models in a Bayesian framework (one for emigration and one for immigration) using the INLA (34, 35) library in R. We excluded data from the two taxa with the fewest species sampled (ferns and frogs) as the number of dispersal events was zero for several regions in these clades. We evaluated the models visually by assessing constant residual variance and residual-predictor dependence. We used the default priors as recommended by Zuur, *et al.* (36), corresponding to a normal distribution ( $\mu = 0$ ,  $\sigma = 31.62$ ) for the fixed effects, and a LogGamma distribution for the log precision ( $a = 1$ ,  $b = 5e-6$ ) of the random intercepts and the residuals.

### **Limitations of the data and approach**

*Biases and errors.* Recent work has shown that natural history collections, databases of species occurrences, and molecular sequences are prone to spatial and temporal biases and errors (37, 38). These issues are also evident for the Neotropics, with several regions considerably less sampled than others, such as the Caatinga in Brazil, which is much less sampled in proportion to its area than some parts of Mesoamerica (Fig. S1, Table S1). In general, phylogenetic under-sampling should lead to a reduced representation in the measurements of biotic interchange. This effect should be most pronounced if species were randomly distributed across the Neotropics. However, several plant and animal subclades within the major clades analyzed are confined to particular biomes or regions, and in those cases the inclusion of a single clade



representative might allow a correct estimation of the direction and number of dispersal events to that region, while a correct timing would demand denser sampling.

Our explicit incorporation of phylogenetic sampling aimed at directly assessing the impact of sampling in our analysis. We found no significant correlation between the number of dispersal events and phylogenetic sampling in the general model that included all regions and modelled clades (Fig. S18), but taking each clade separately we did find strong correlations (Figs. S14, S17). A similar result was obtained for the relation between total branch lengths and phylogenetic sampling, with no correlation in the general analysis but clade-specific correlations (Fig. S15); as well as between the number of occurrence records in each region and phylogenetic sampling, with an overall negative relation but clade-specific variation, from positive to neutral trends (Fig. S16). These results indicate that while the general results do not seem primarily controlled by sampling, we cannot exclude sampling biases at the level of individual clades and regions, and general biases beyond what our models could detect. Qualitatively, the overall congruence in the dispersal patterns obtained for well-sampled *vs* low-sampled clades (e.g., birds and mammals, as compared to angiosperms) suggests that uneven phylogenetic sampling is unlikely to alter the main conclusions of this study. Further sampling across the Neotropics will be crucial to further refine the results presented here.

In terms of errors (such as erroneous geo-referencing or identification), the various automated data verification and cleaning steps performed here do not replace manual verification by specialists, but our previous empirical evaluations show that they should have led to substantial improvements in data quality for the spatial scale of our analyses (16, 39).

*Spatial scale.* We could have chosen to perform our analyses on finer, more ecologically relevant units such as ecoregions (40) or vegetation types such as pockets of gallery forest within the Cerrado (41). However, this would lead to additional problems in terms of phylogenetic sampling (which would be very low for smaller regions, such as the Chocó, and patches of savanna scattered across Amazonian and Mesoamerican rainforests); accurate geographic coding (due for instance to the lack of precision in many species records, and unclear or complex limits between regions); and biogeographic analyses (since the DEC model used here is unable to handle a high number of regions in the geographic range evolution analyses). We expect our relatively coarse region delimitations to retain accuracy but decrease in precision as compared to a more fine-scale analysis. In addition, our delimitations preclude us from a definite differentiation between dispersal events involving shifts in major biome types from those remaining within a similar biome type, implying that our quantification of those

variables require further exploration with finer-scale data. This is particularly clear for dispersal events involving Mesoamerica and the West Indies, which comprise mosaics of different habitats and biomes, in relatively small areas. For instance, a lineage in the Andean Grasslands that disperses into Mesoamerica may remain confined to the Páramos of Panama and Costa Rica, while an Amazonian lineage may instead colonize the lowland rainforests of these countries, but none of these outcomes can be currently tested with our region classification.

*Biome evolution.* Our attempt to model the evolution and connectivity of Neotropical biomes through time should be seen as provisional and subject to improvements. Although there have been large changes in the areas of tropical biomes over time (42, 43), there are also large uncertainties of how to accurately infer the history and diversity of past ecosystems in general (44), and Neotropical biomes in particular (45). Since the major patterns reported here are similar between the unconstrained and the time-constrained biogeographic analyses, we do not expect these results to change at any significant degree even if ages of the regions analyzed, or their connectivity patterns, were to change moderately.

*Extinction.* Taxonomically and spatially uneven species extinctions could influence the inferred dynamics of regional sources and sinks of lineages, especially among large terrestrial mammals and birds, as well as in insular habitats such as the West Indies (46). However, the congruence in patterns of regional interchange across the six major clades analyzed indicates that differences in recent extinction across groups have not influenced the overall results.

*Phylogenetic uncertainty.* Although it would have been desirable to perform similar biogeographic reconstructions on tree samples rather than single phylogenies to take into account topological and branch length heterogeneity, the complexity of the analytical steps performed here rendered this unfeasible. Given the large number of species analyzed, and the cross-taxonomic congruence in most results, we expect that ambiguities due to phylogenetic uncertainty are surpassed by biogeographic signal.

*Overall approach.* Large-scale analyses based on data mining have been criticized, in favor of carefully controlled studies focused on single clades (44). We argue that synthetic, ‘top-down’ approaches and fine-scale, ‘bottom-up’ studies are complementary, mutually beneficial, and crucial for better understanding evolutionary history across multiple temporal, spatial, and taxonomic scales. By performing separate analyses on multiple taxonomic groups with different

diversification rates and biogeographic histories, and using independent phylogenetic and distribution datasets, we are more likely to have taken into account clade heterogeneity, and obtained biologically realistic signals out of any underlying noise. Although further biological sampling in all Neotropical regions will be beneficial in many ways, these considerations suggest that our conclusions are not flawed by the data and methodology applied here.

### **Data availability**

All original datasets of occurrence records are available through the DOIs provided in references 1–6 of this Supporting Information. The cleaned records used for the analyses, the resulting subclades pruned from the original phylogenies, as well as all analytical scripts based on these, are freely available from <https://doi.org/10.5281/zenodo.1149127>

Angiosperms

Figure S1: Occurrence records per grid cell

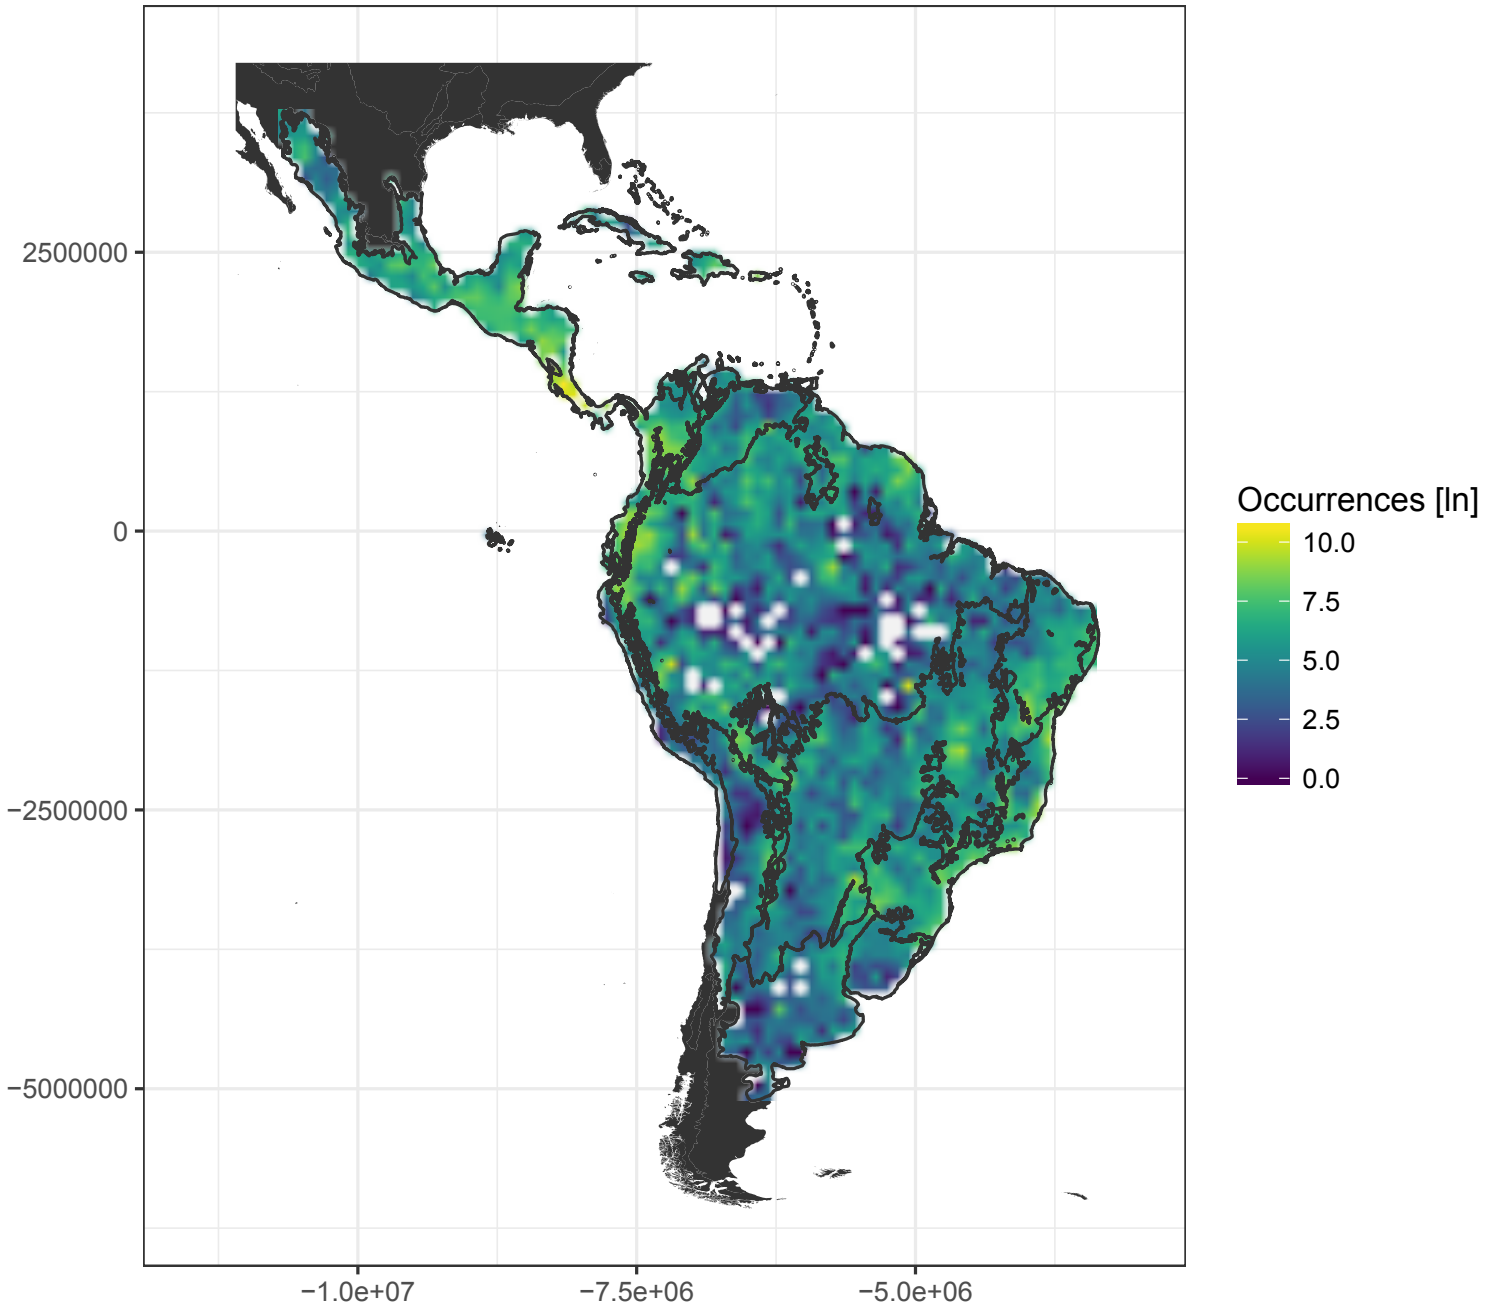

Birds

Figure S1: Occurrence records per grid cell

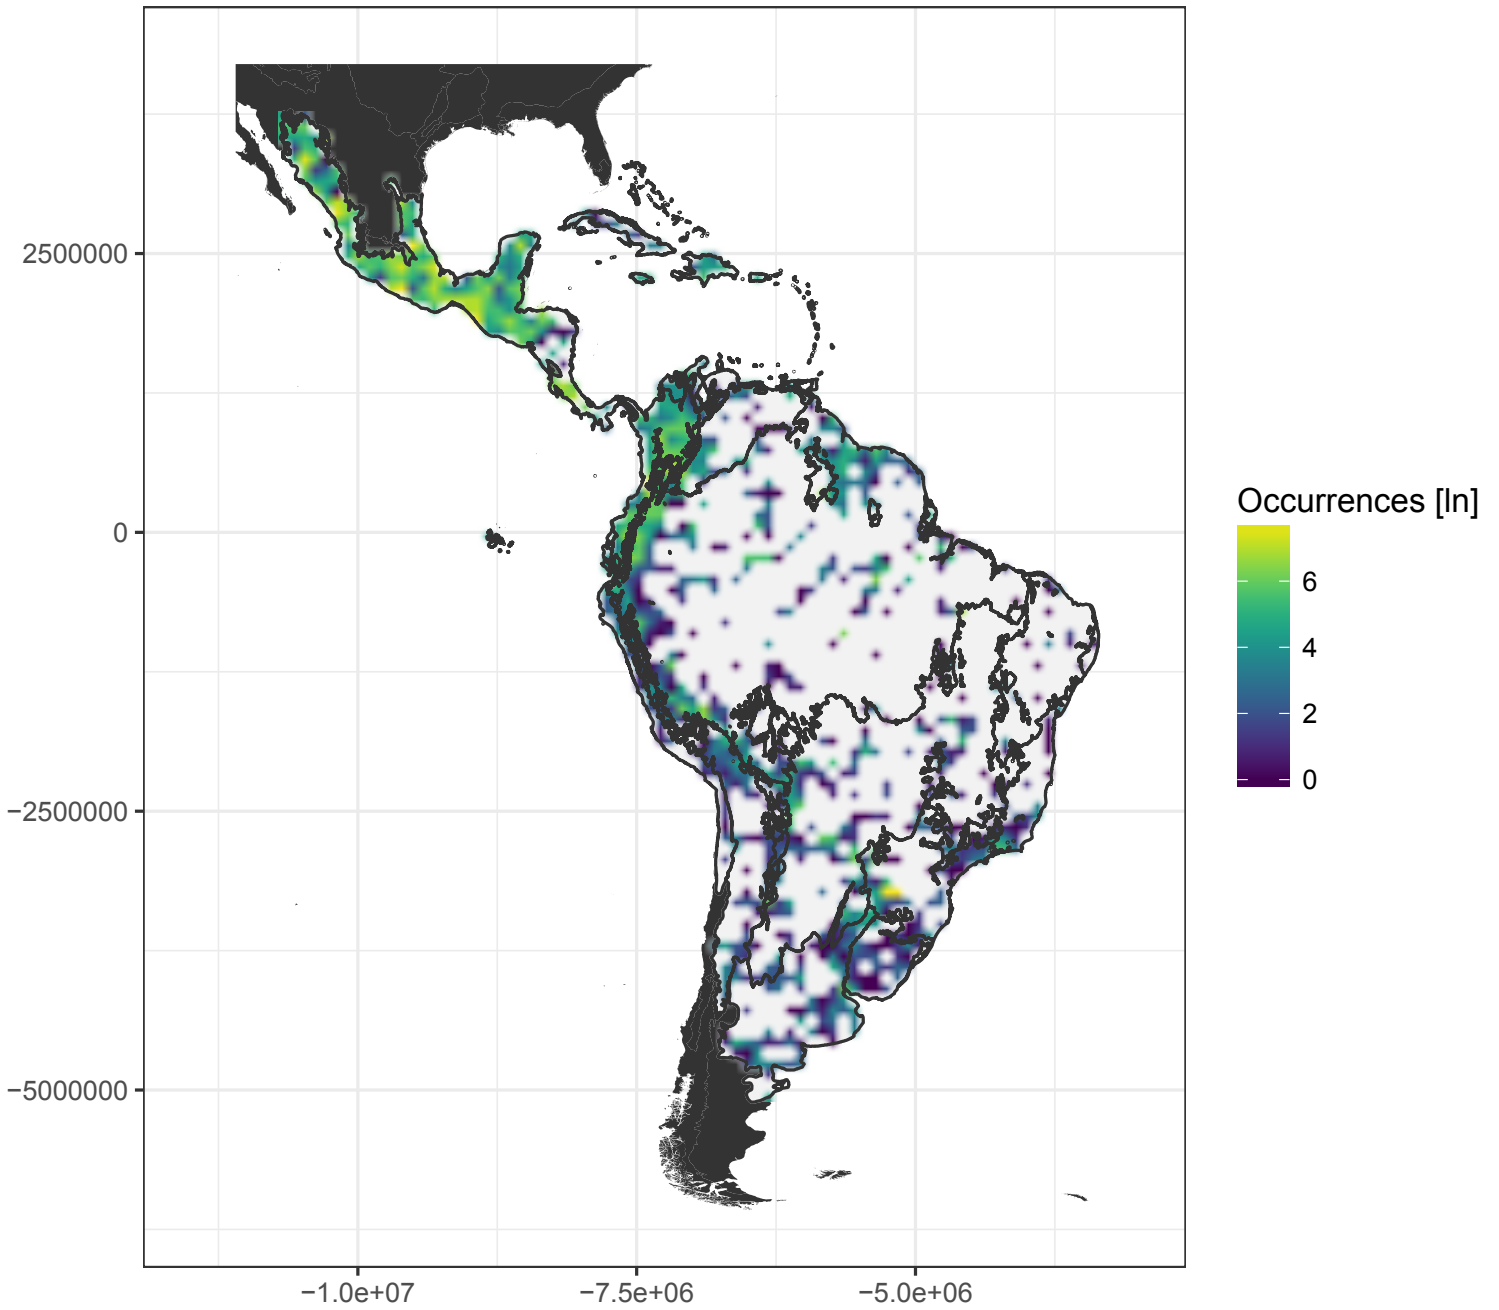

Ferns

Figure S1: Occurrence records per grid cell

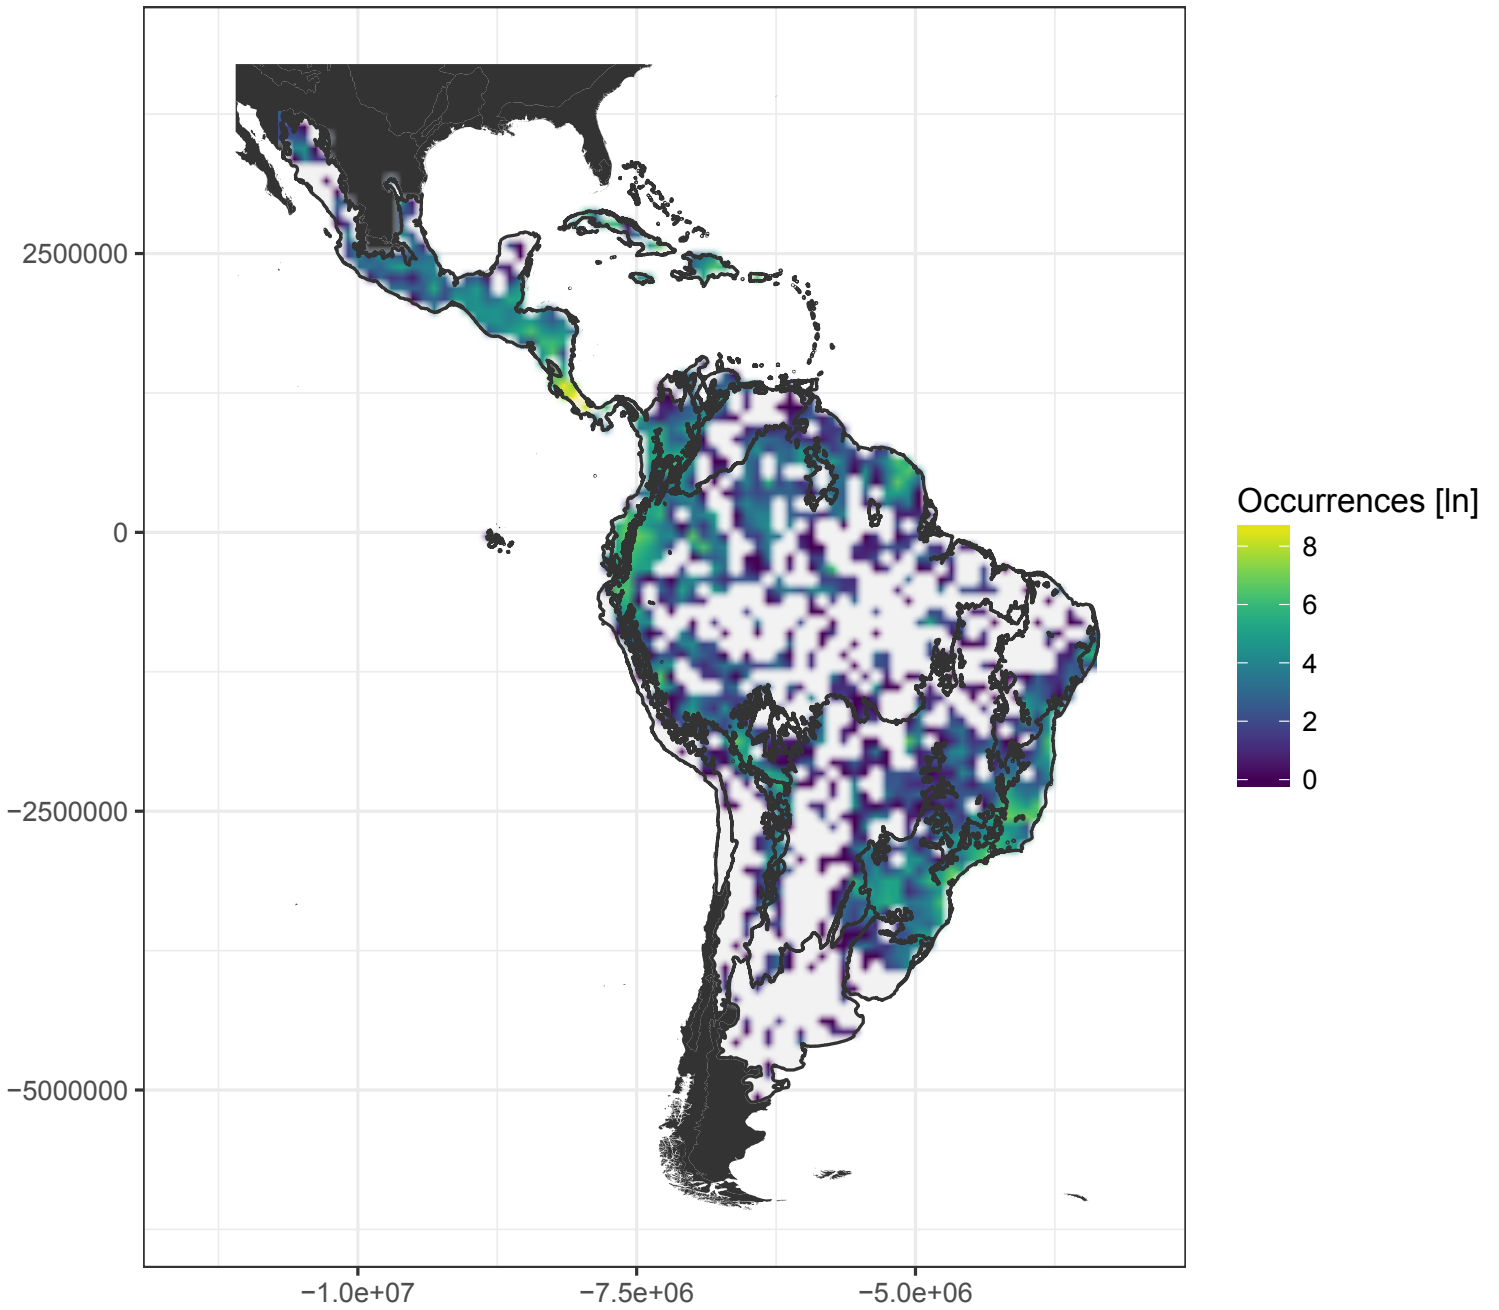

Frogs

Figure S1: Occurrence records per grid cell

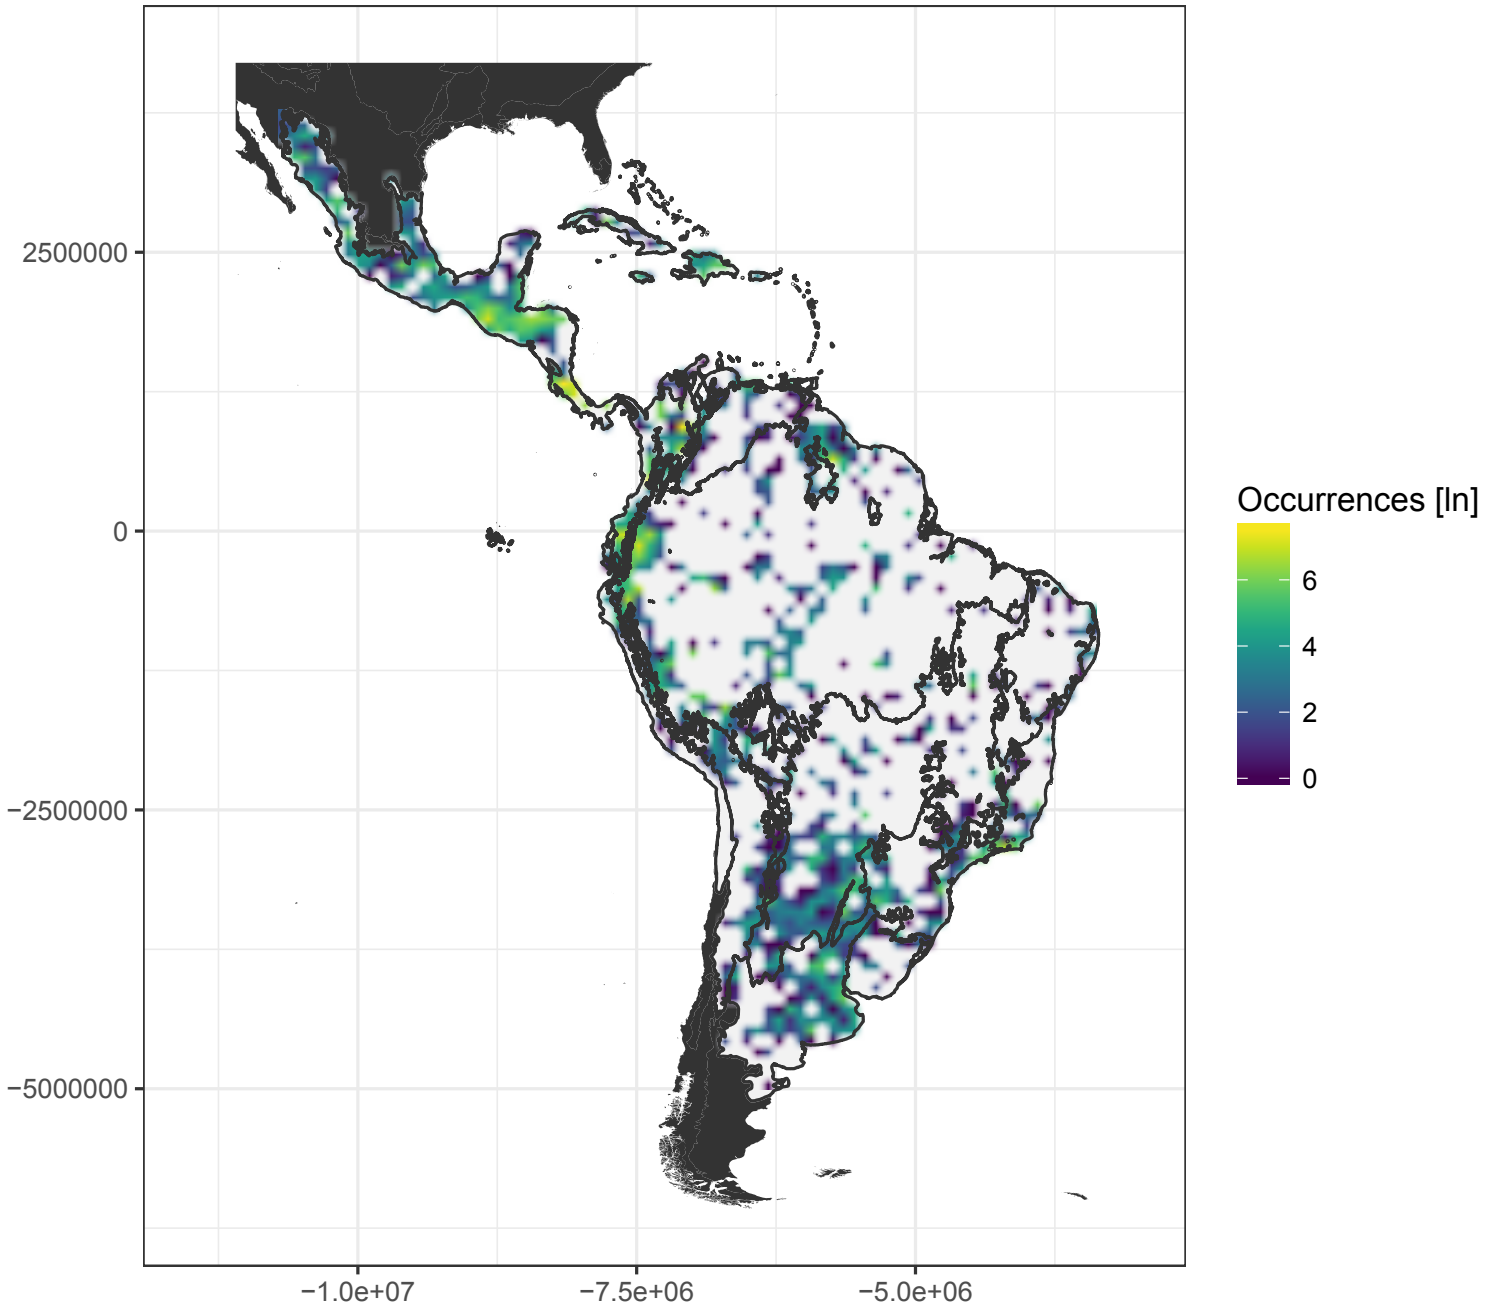

Mammals

Figure S1: Occurrence records per grid cell

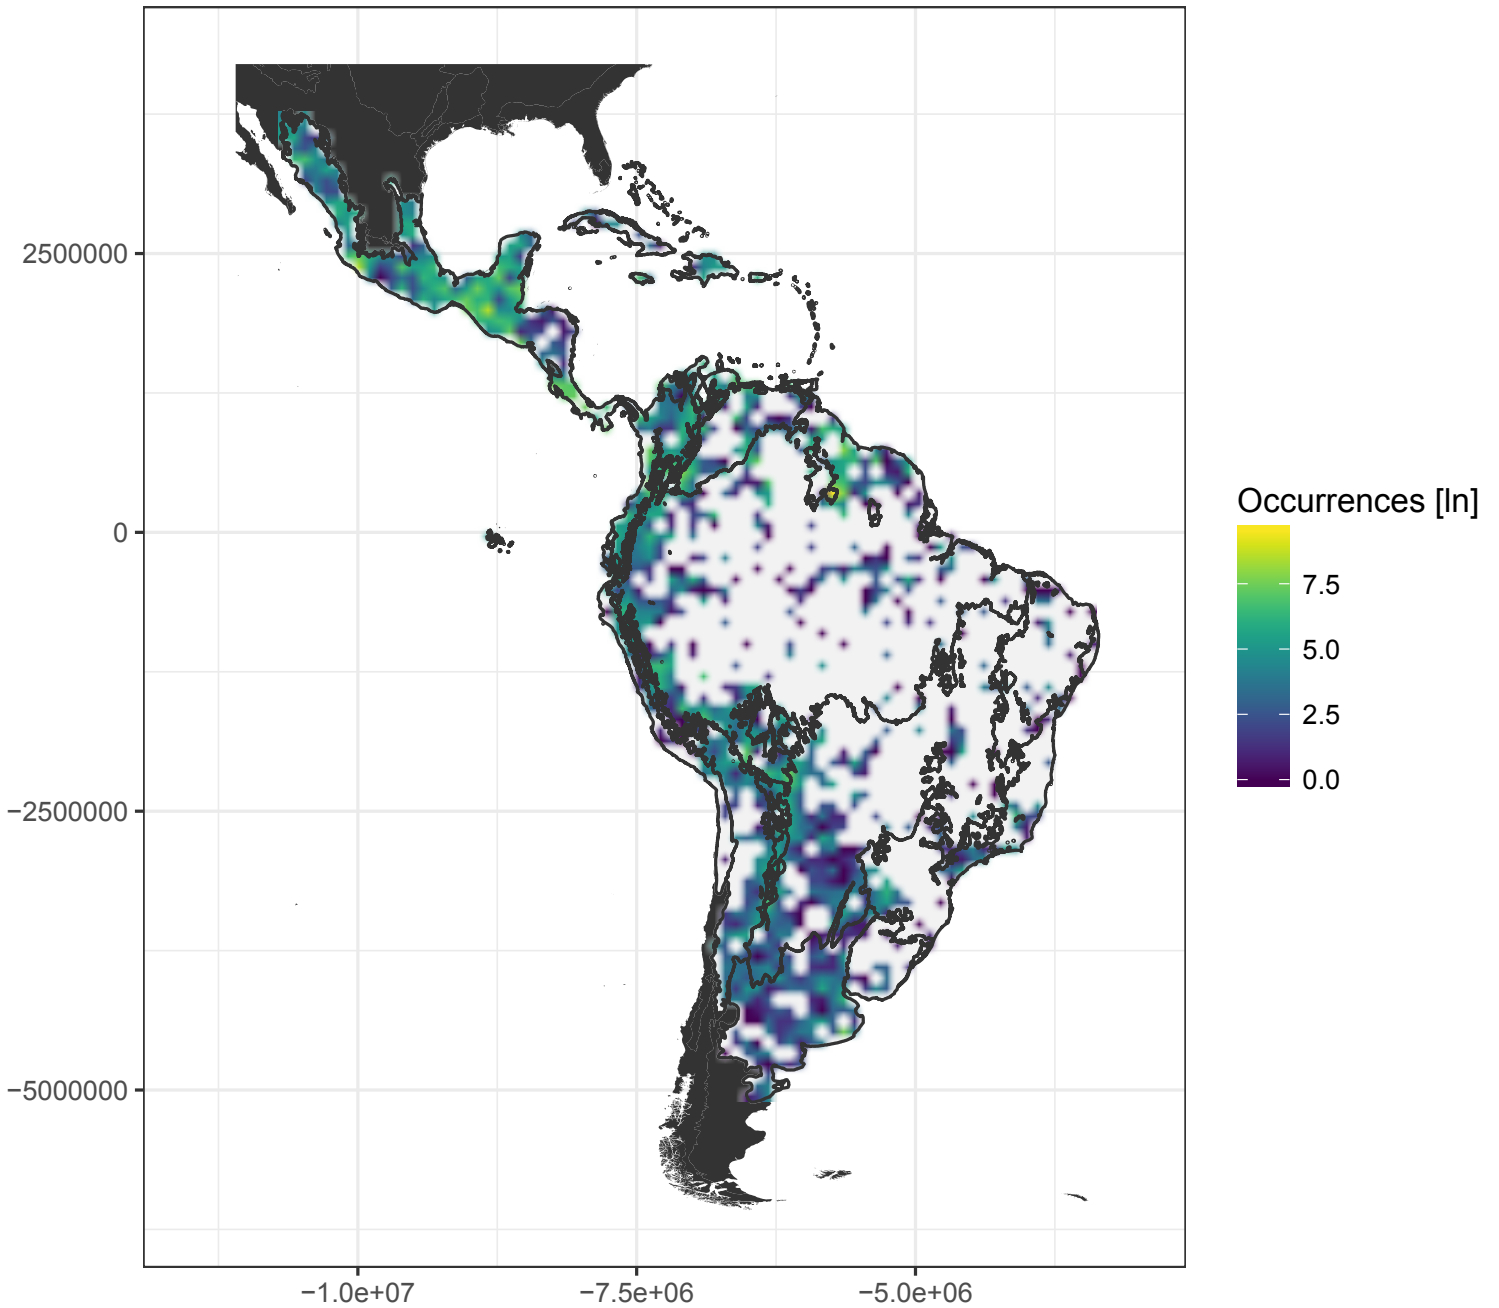



Squamates

Figure S1: Occurrence records per grid cell

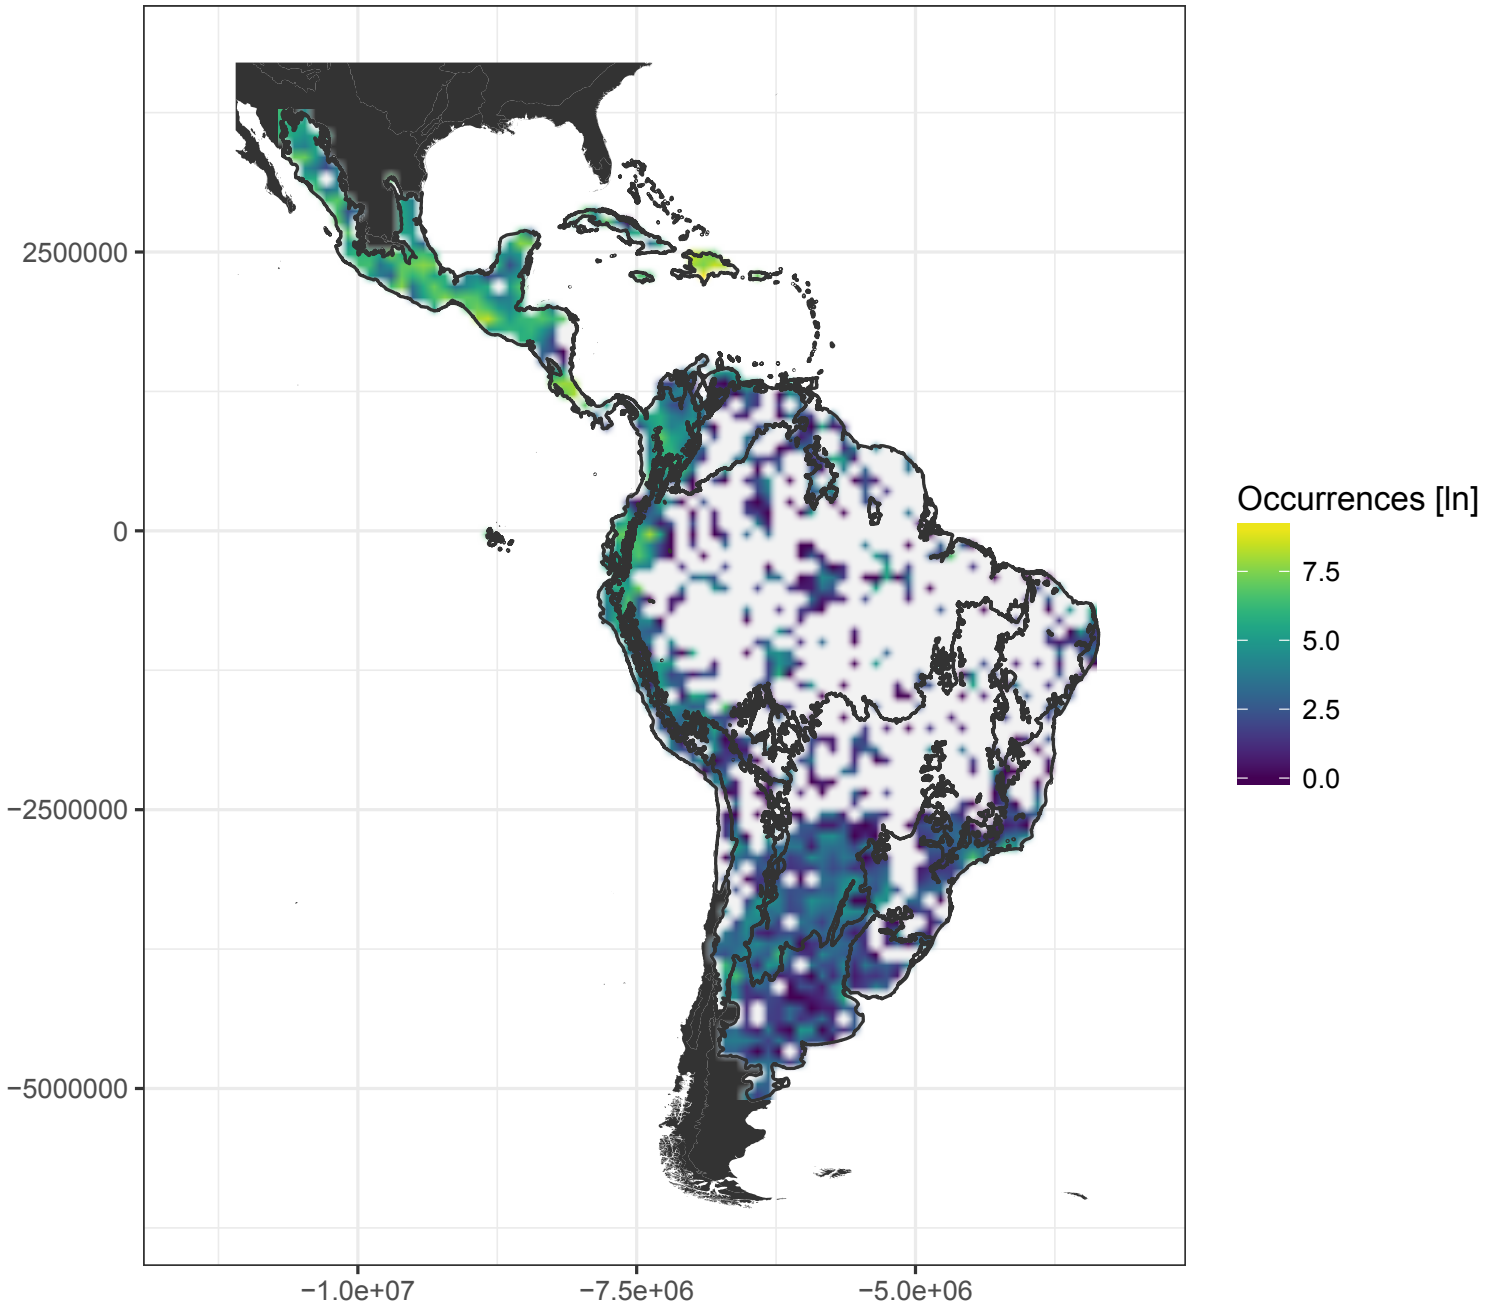

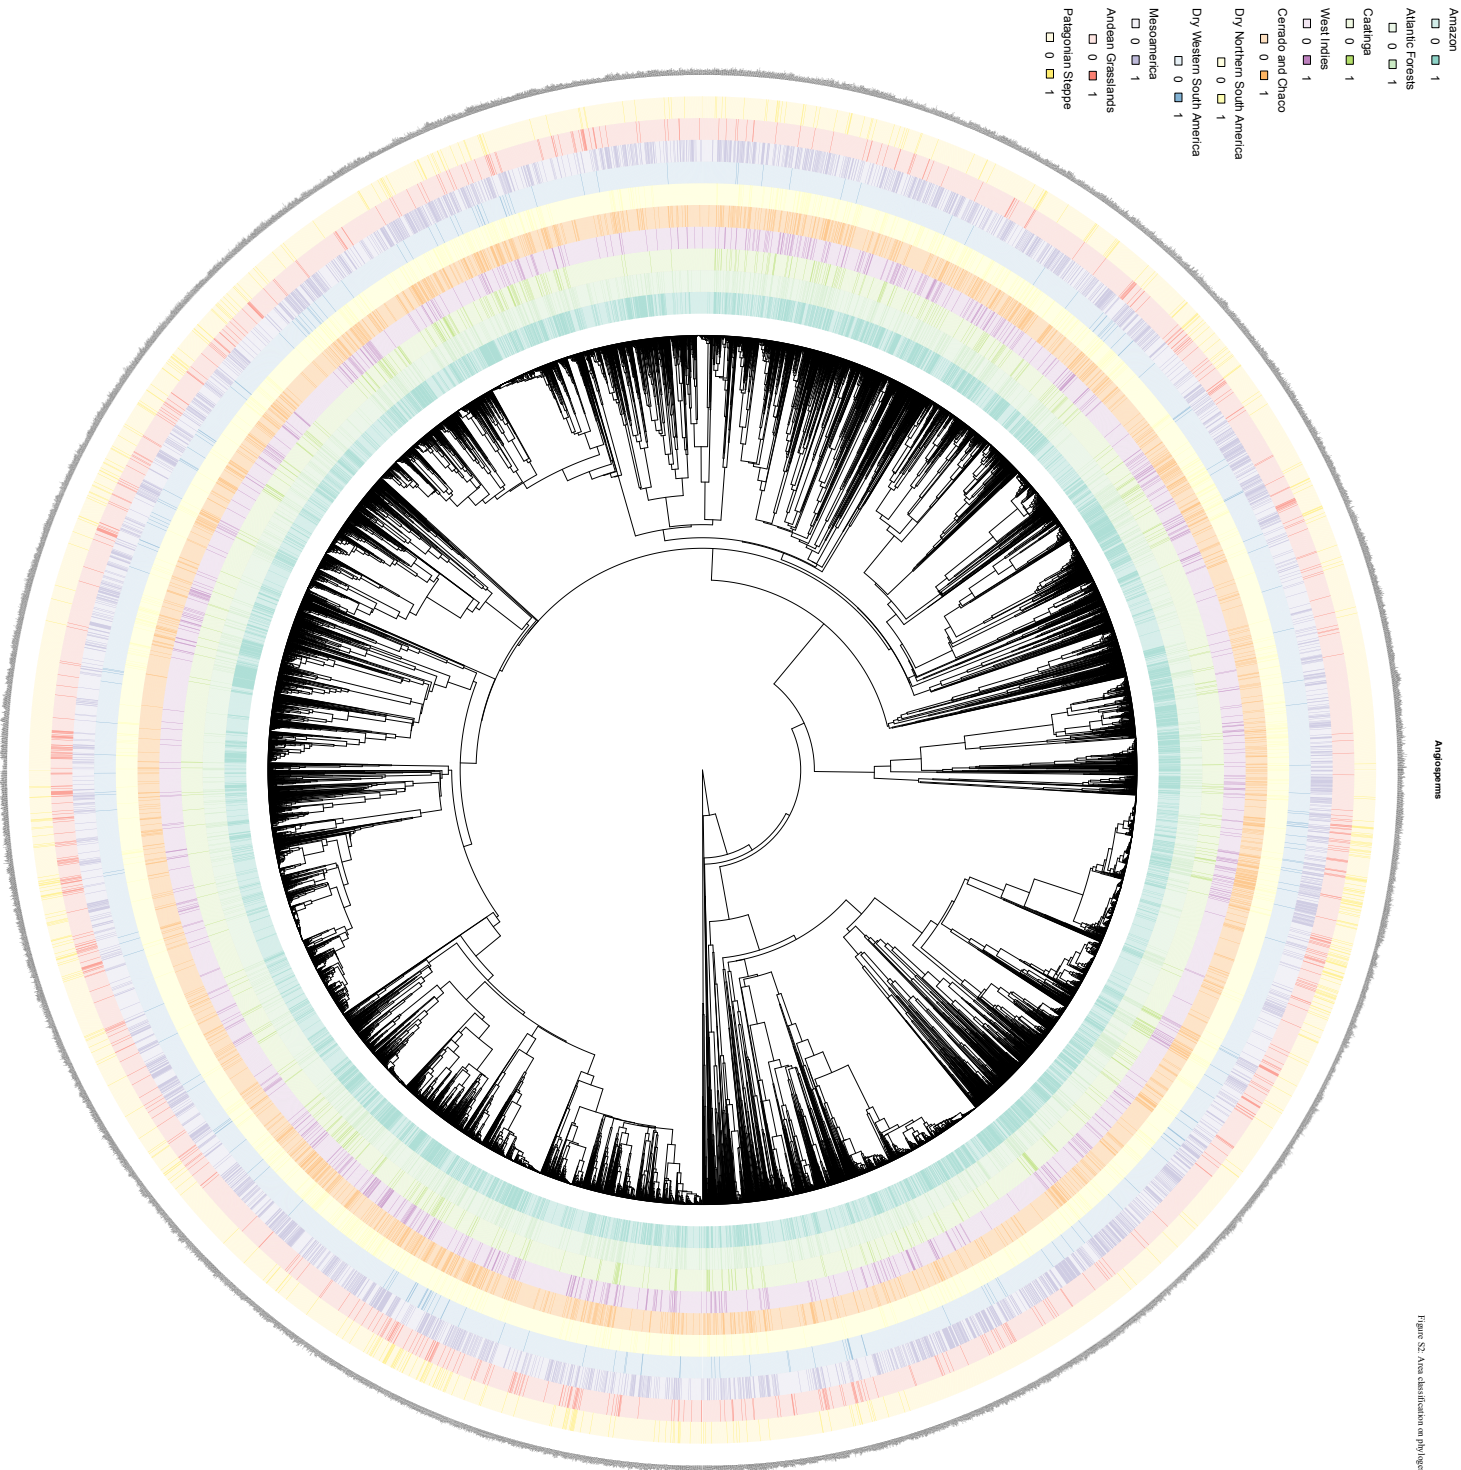

Figure S1. Area identification on phylogenies

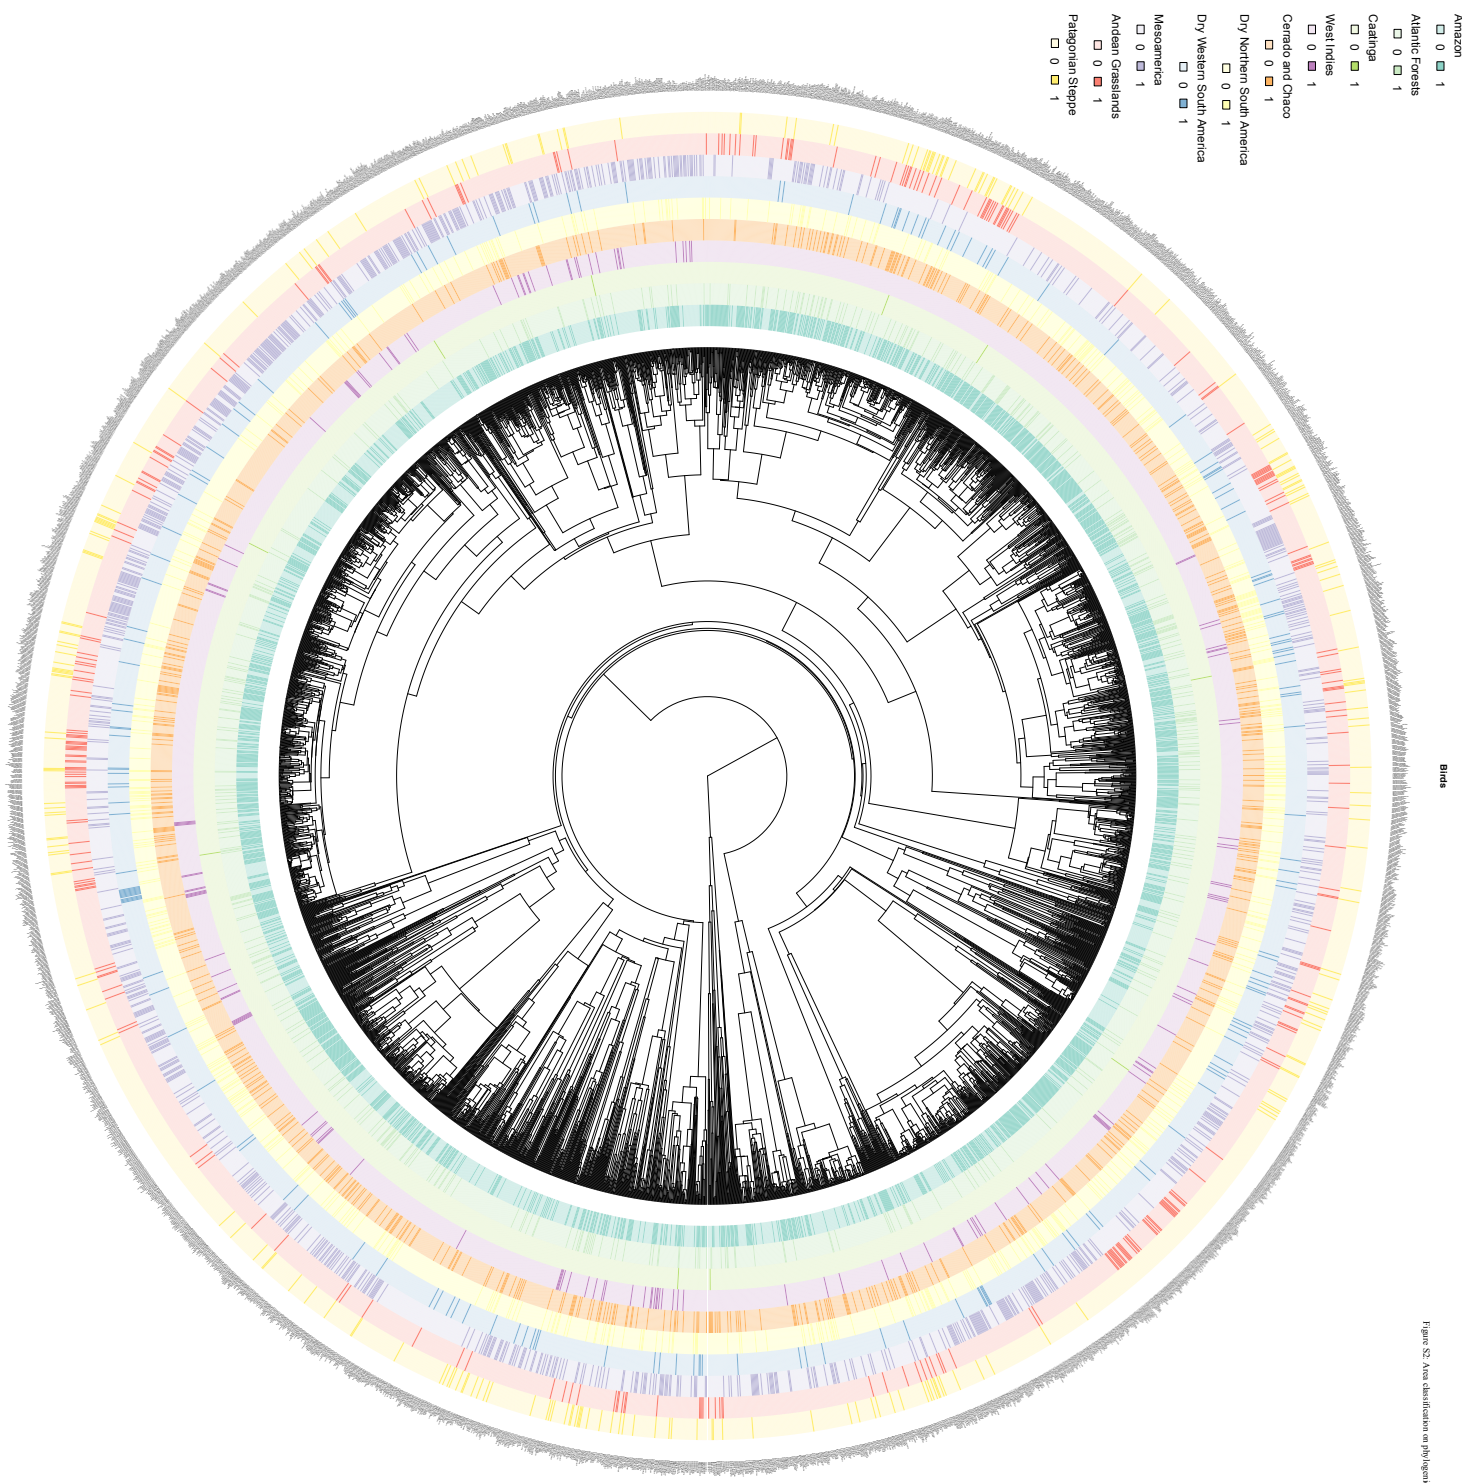

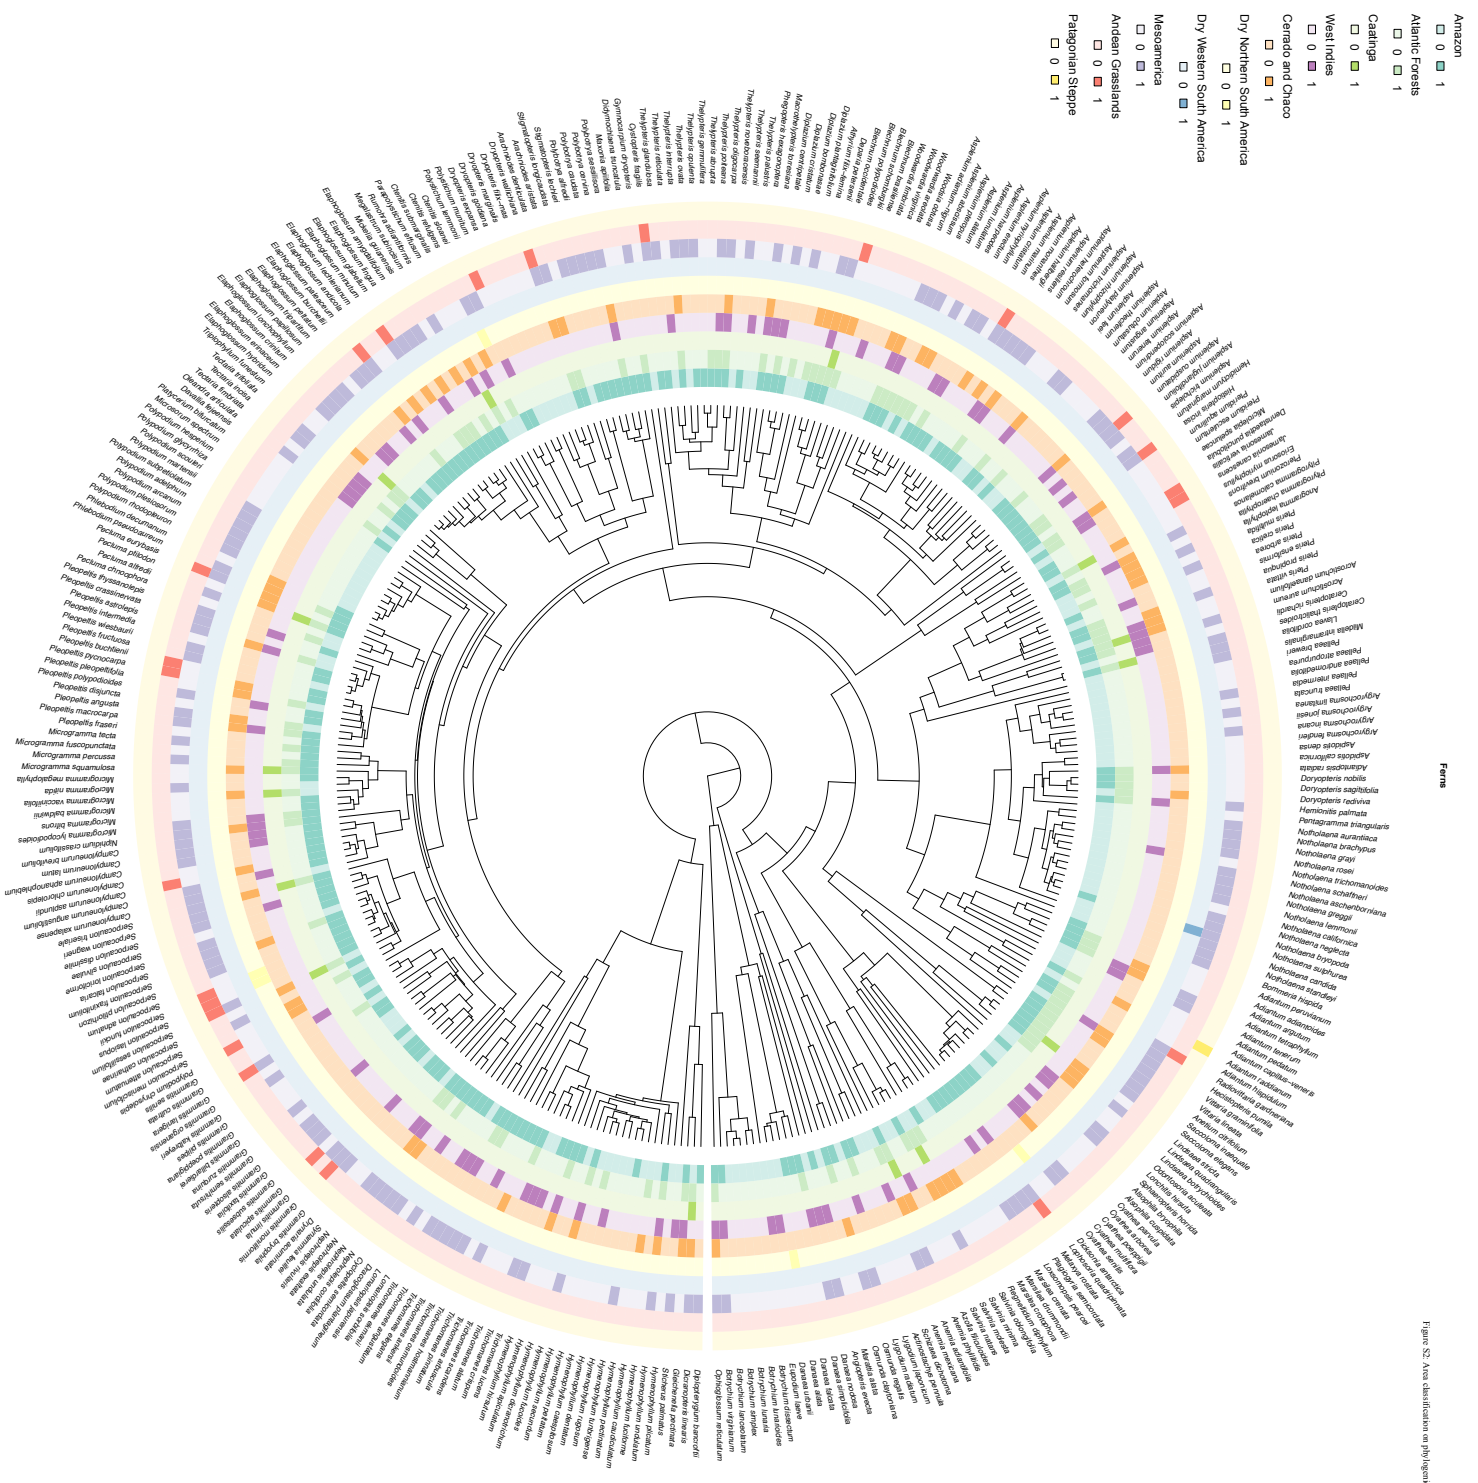

Ferns

Figure S5. Area distribution on phylogenies

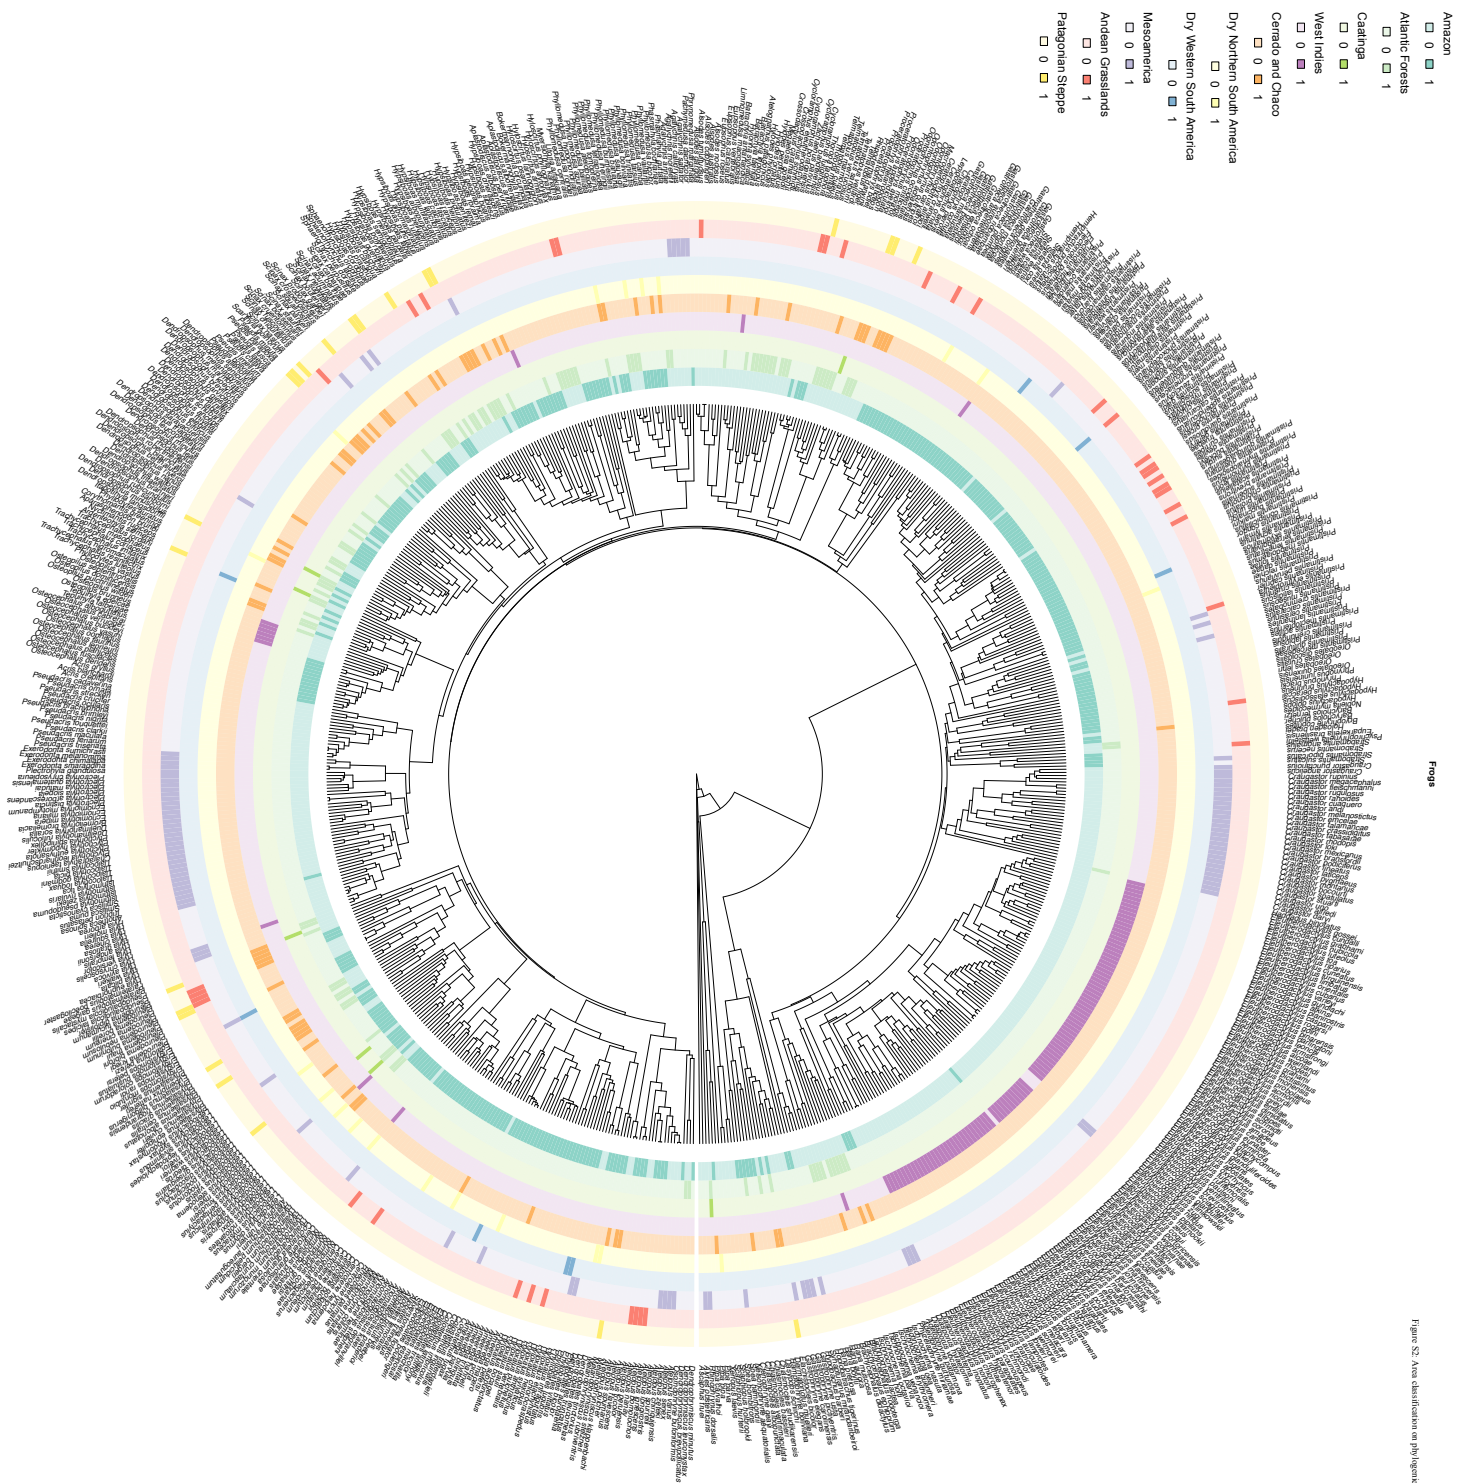

Phylo

Figure S2. Area classification on phylogenies

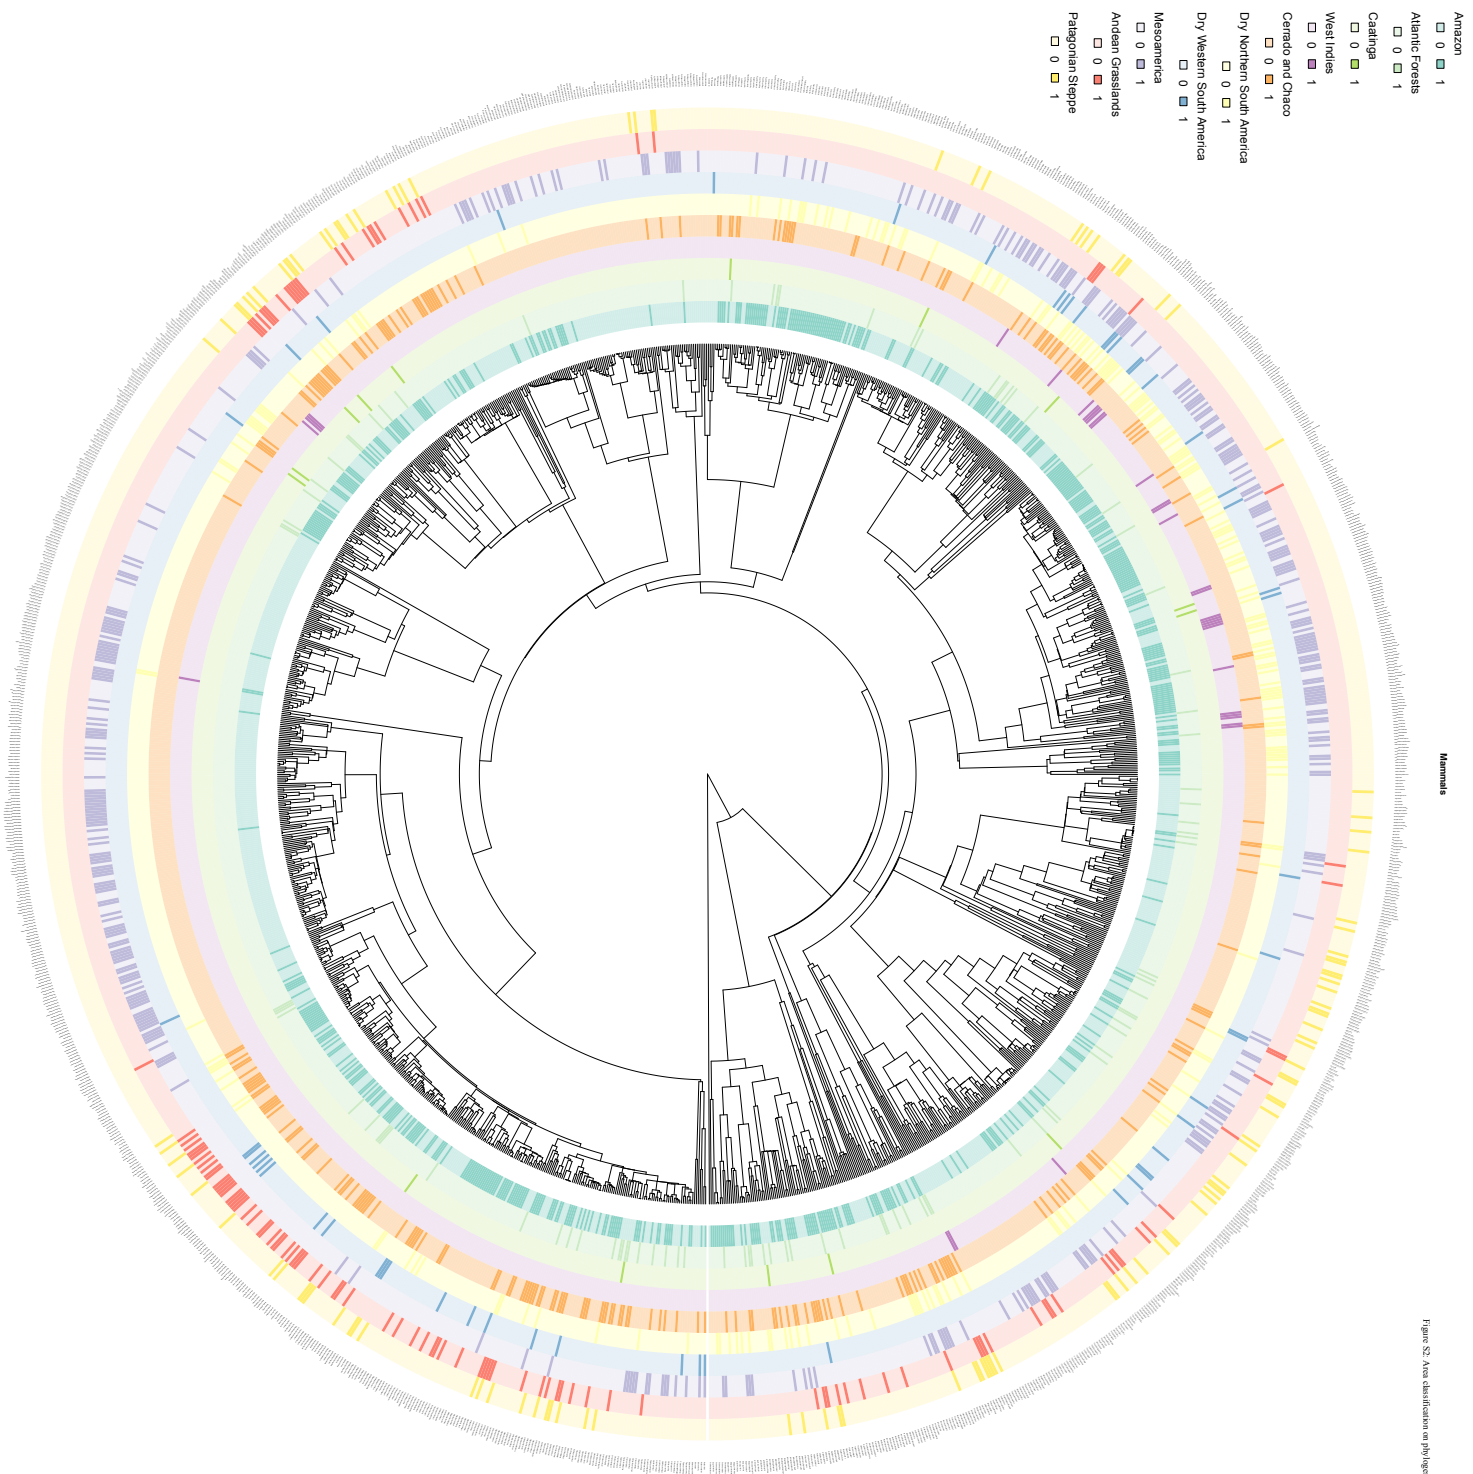

Figure S2. Area classification on phylogenies

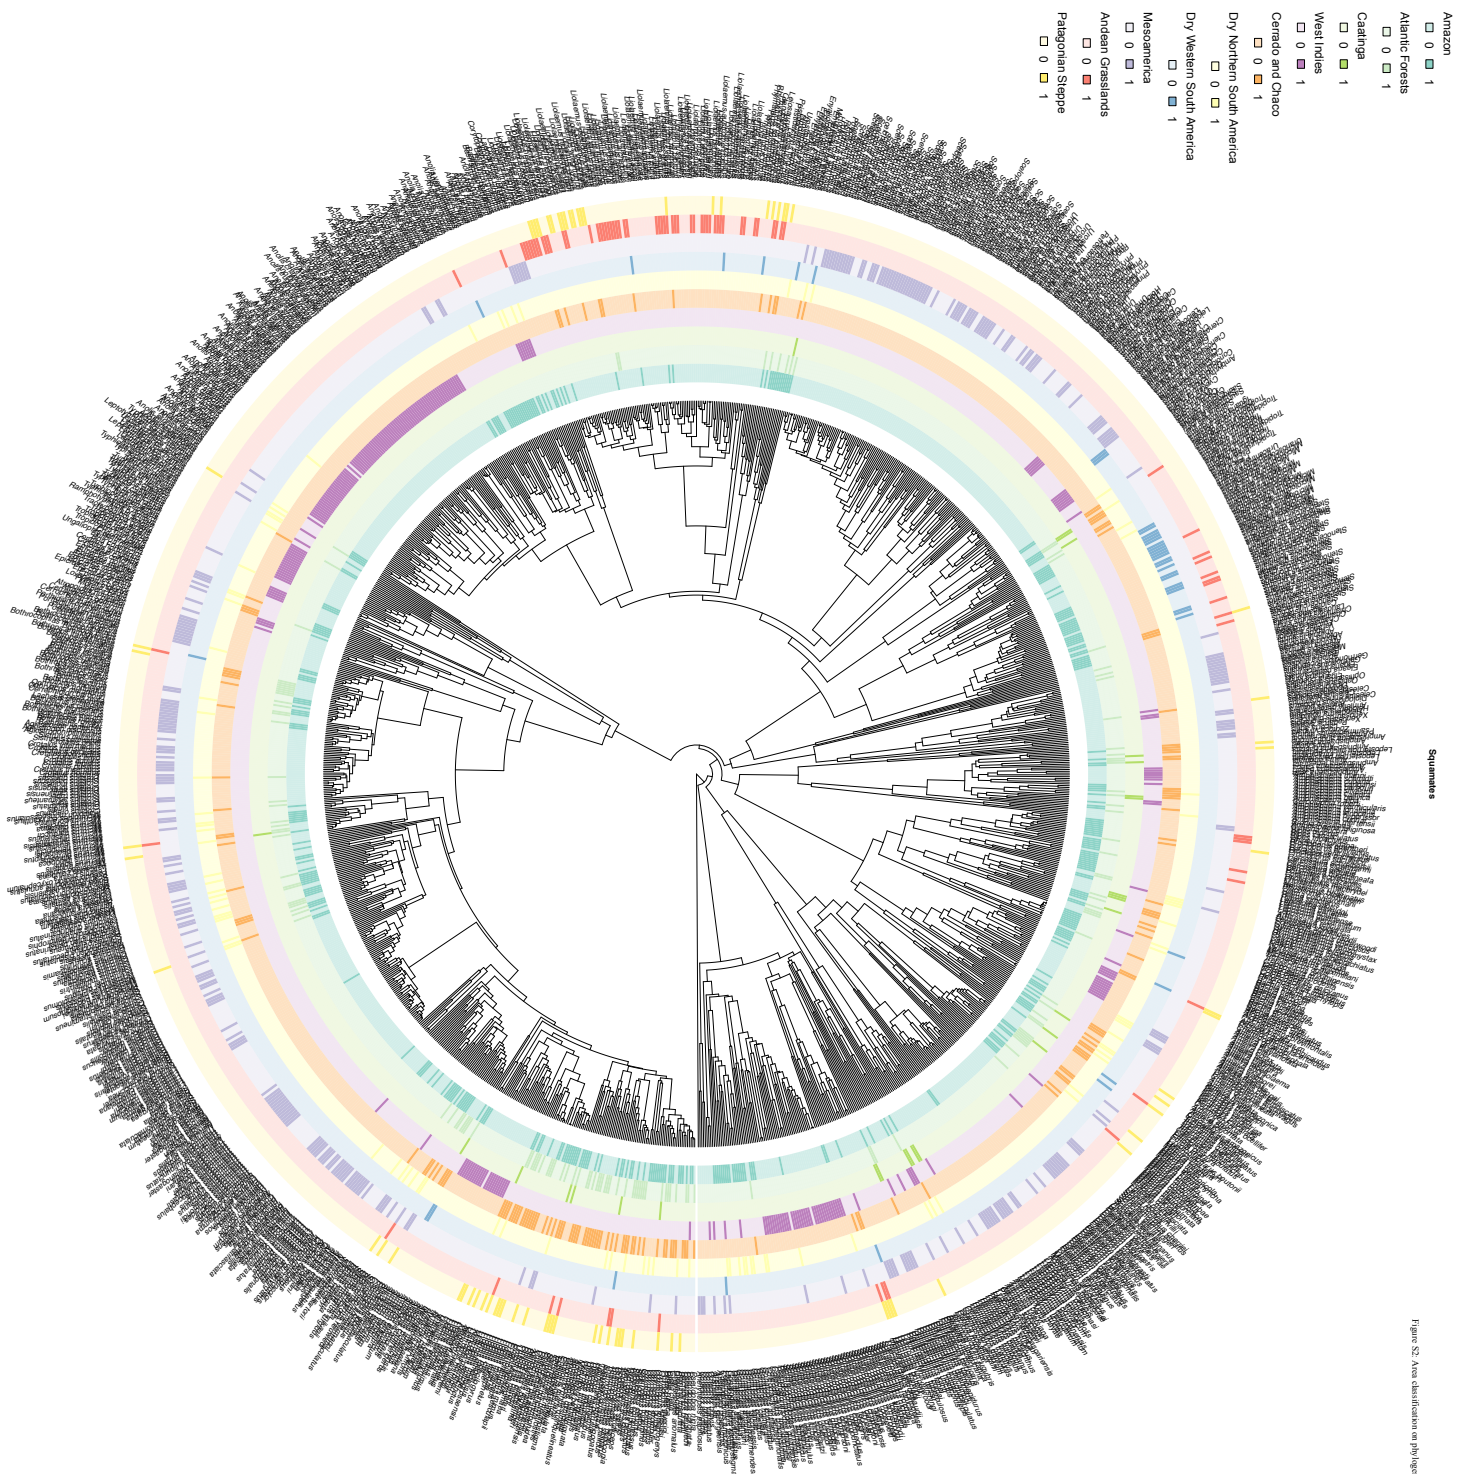

Figure S3: Clades of angiosperms

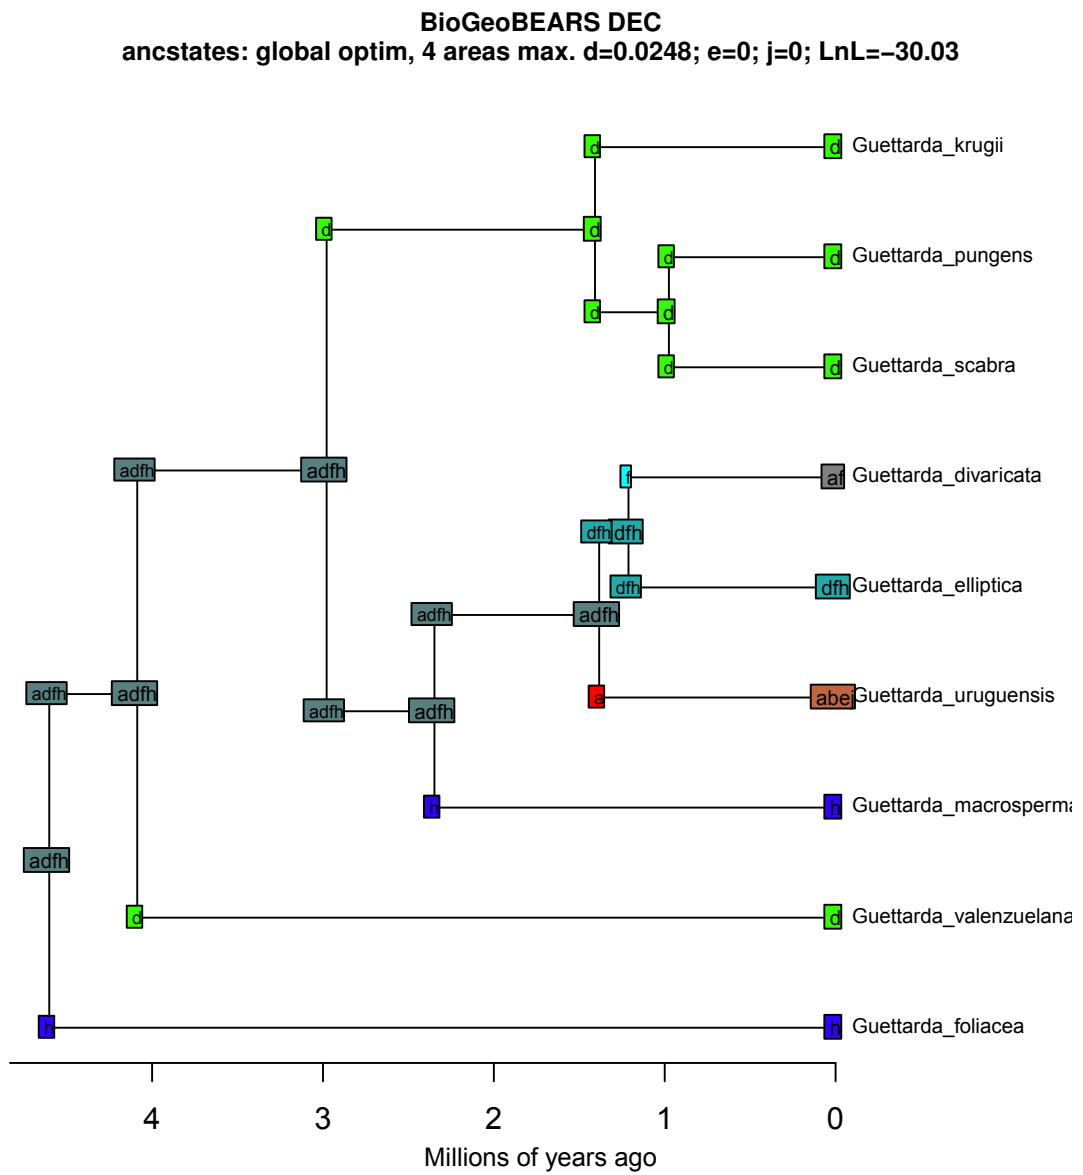



Figure S3: Clades of angiosperms

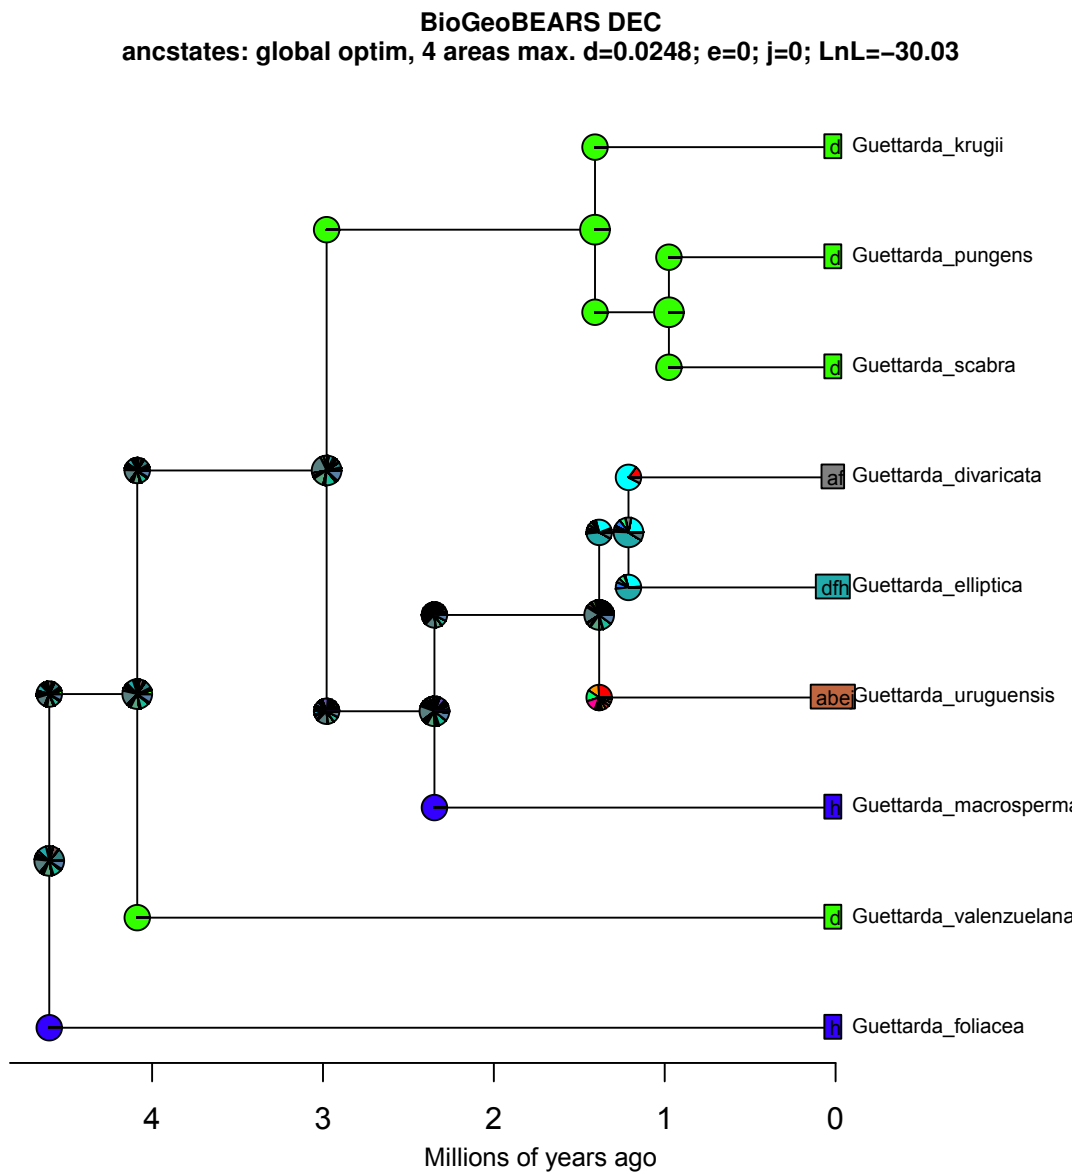

Figure S3: Clades of angiosperms

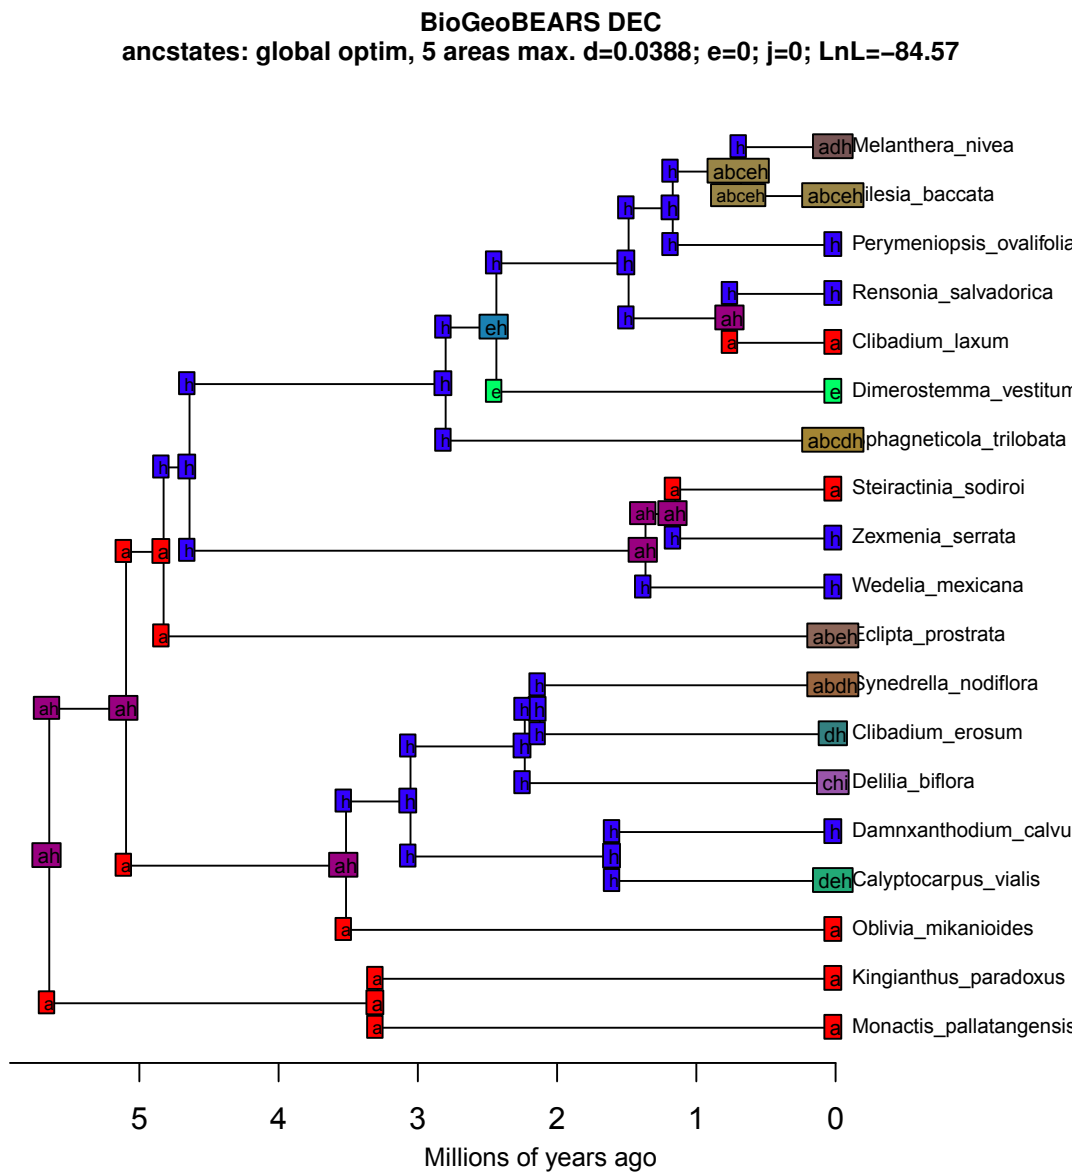

Figure S3: Clades of angiosperms

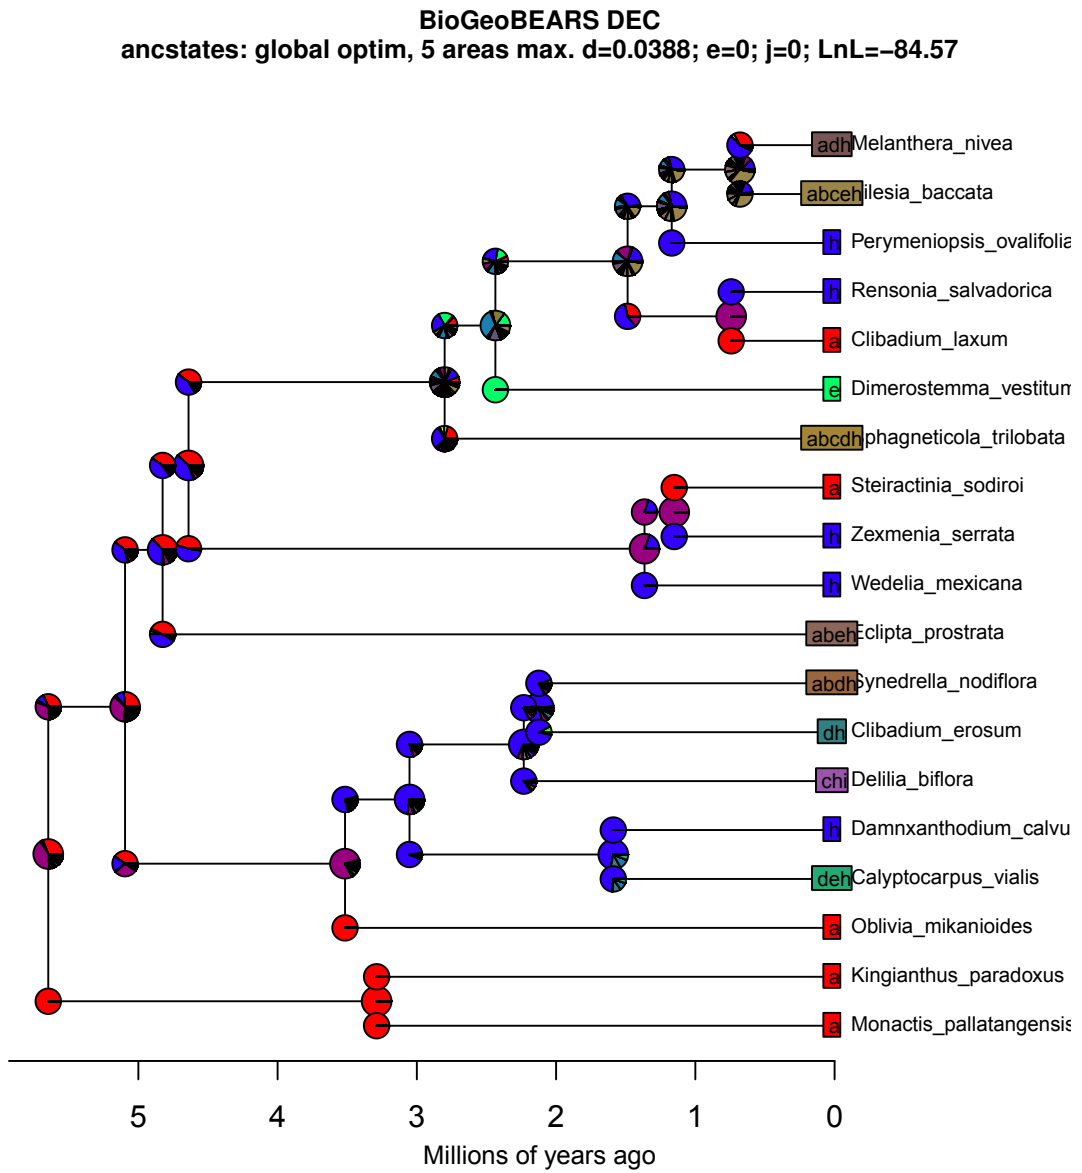

Figure S3: Clades of angiosperms

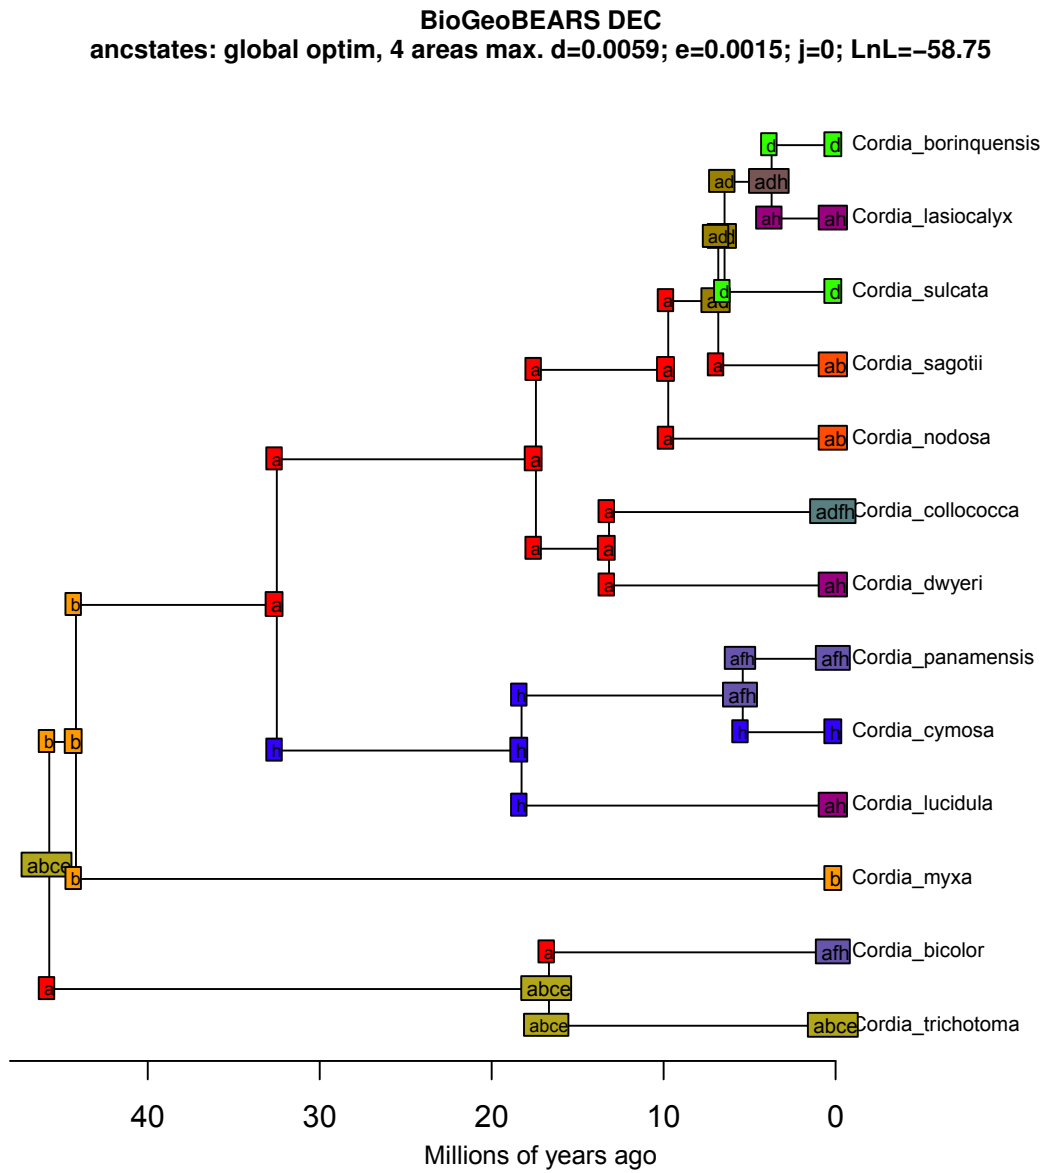

Figure S3: Clades of angiosperms

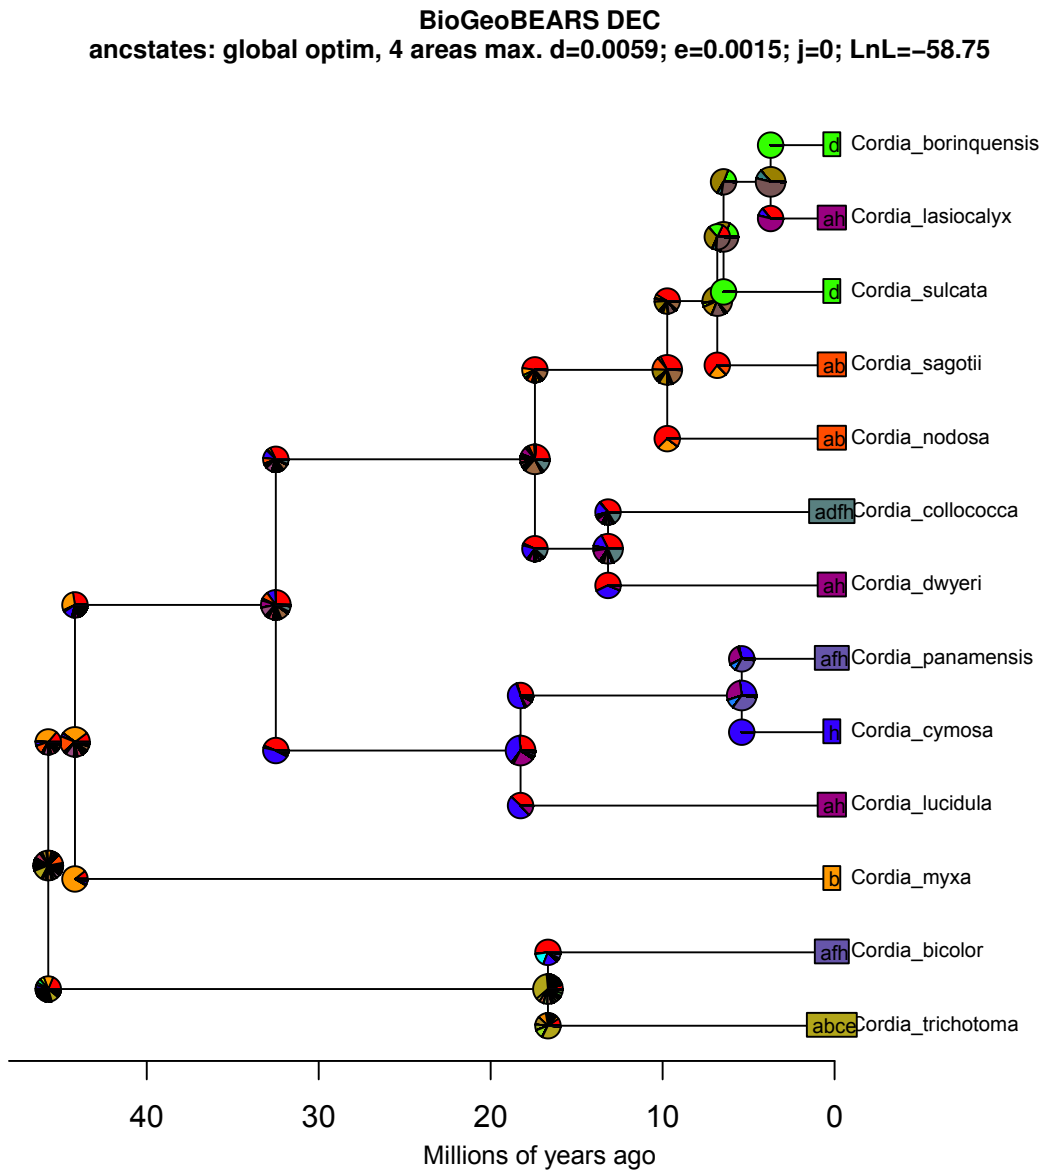

Figure S3: Clades of angiosperms

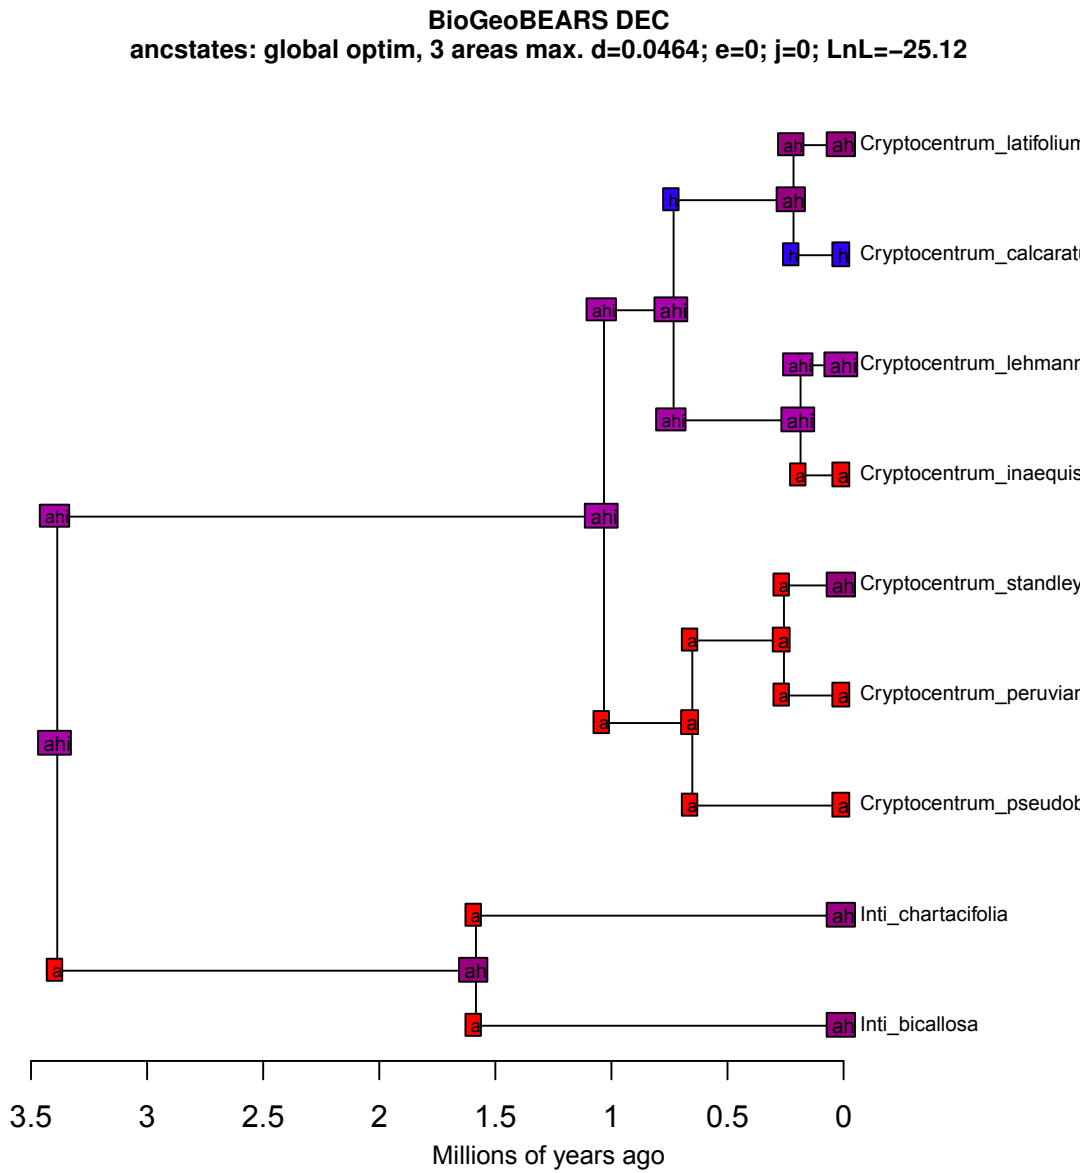

Figure S3: Clades of angiosperms

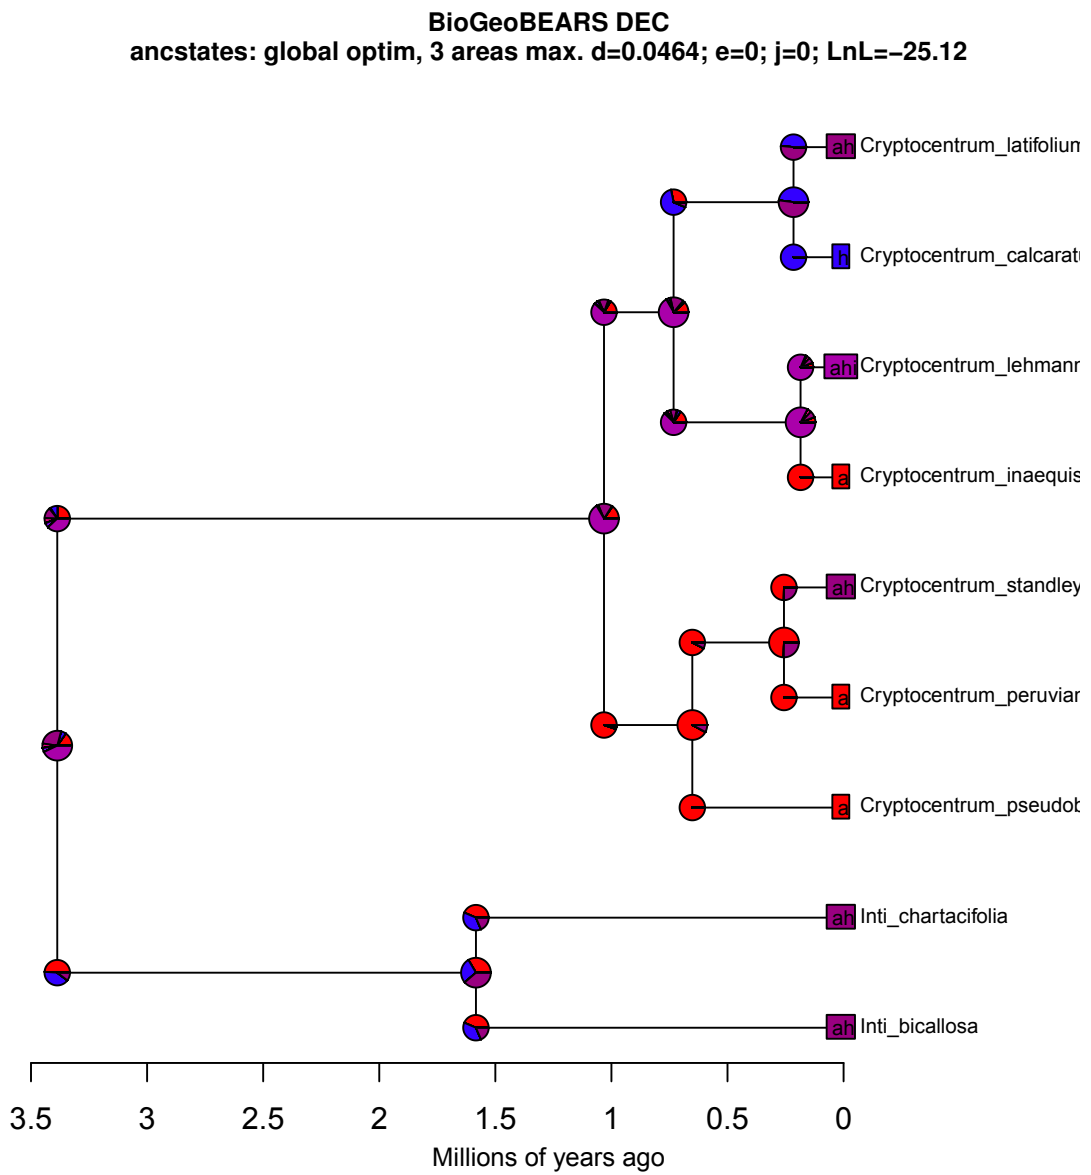

Figure S3: Clades of angiosperms

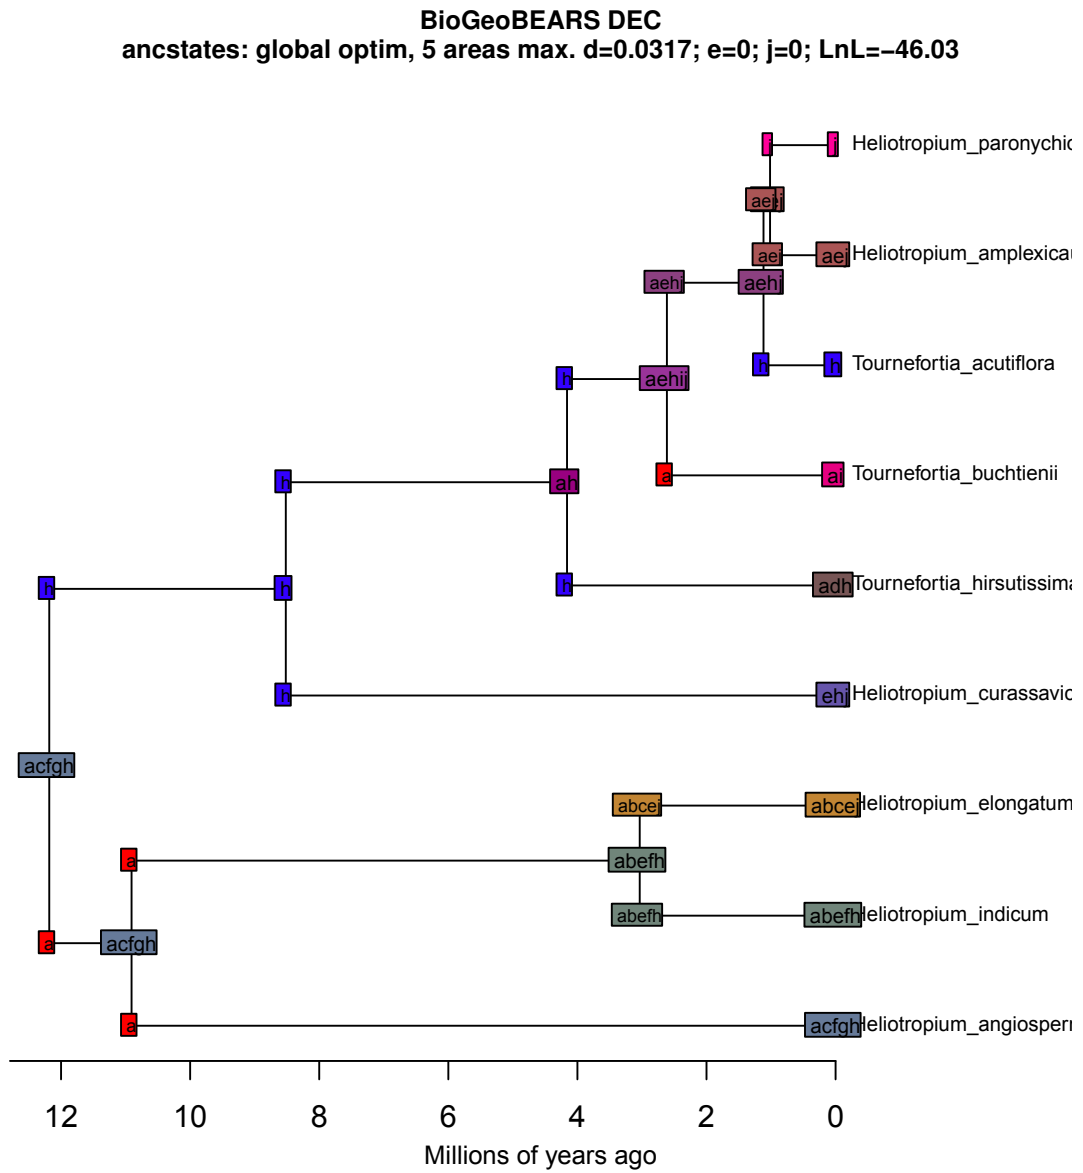



Figure S3: Clades of angiosperms

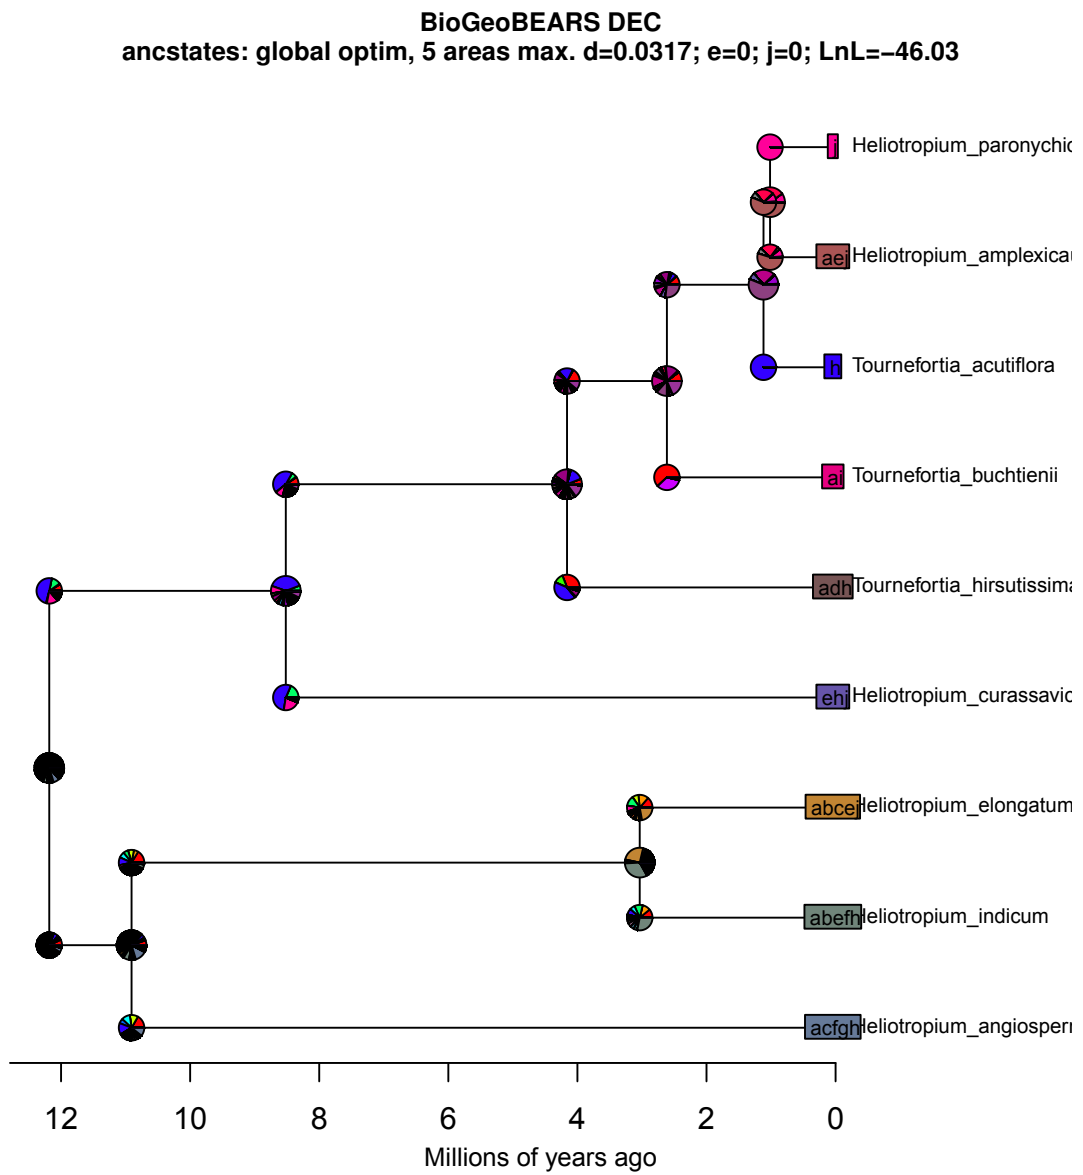

Figure S3: Clades of angiosperms

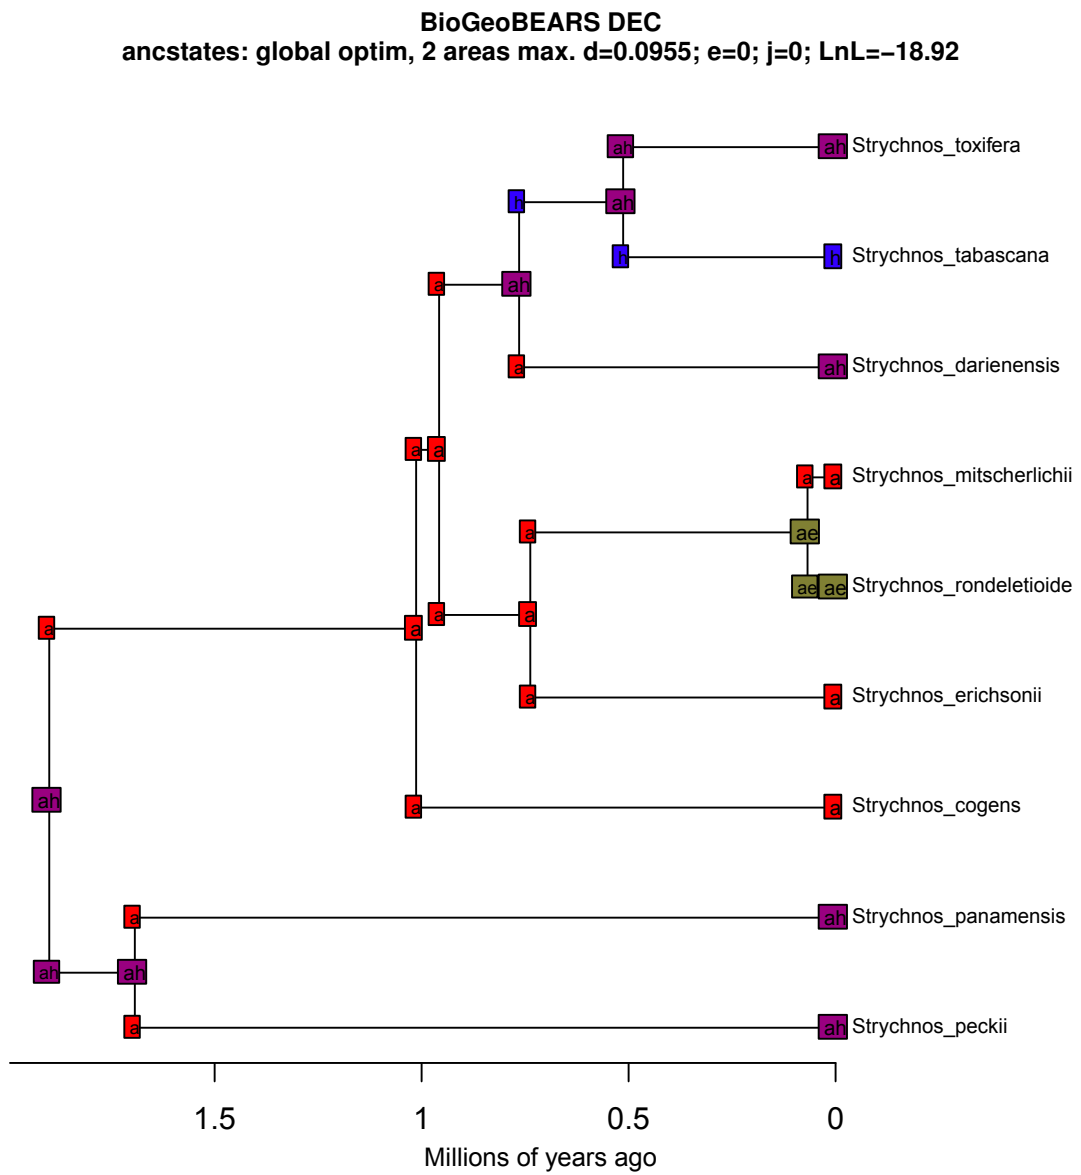

Figure S3: Clades of angiosperms

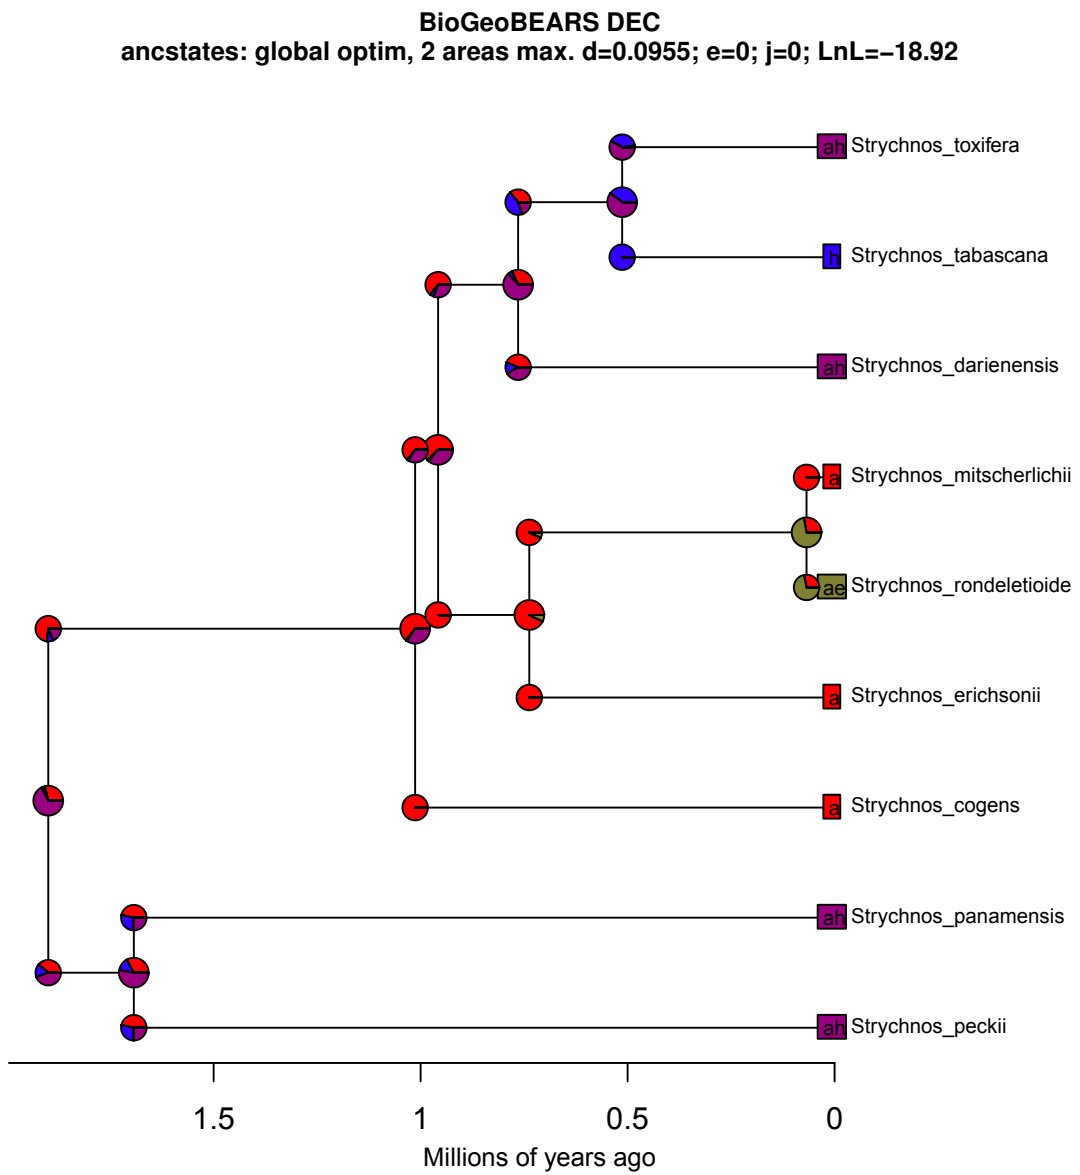

Figure S3: Clades of angiosperms

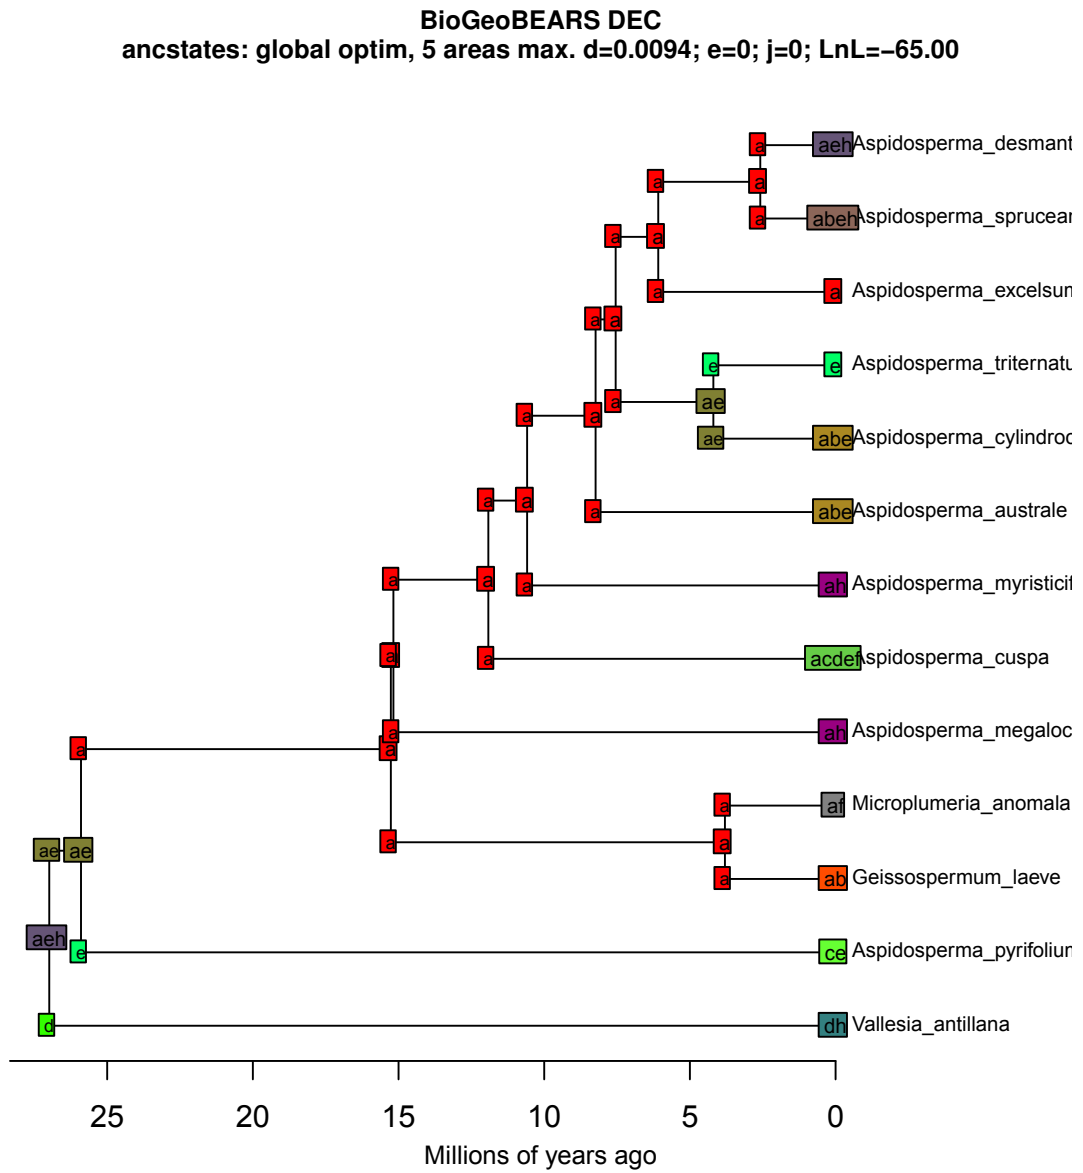

Figure S3: Clades of angiosperms

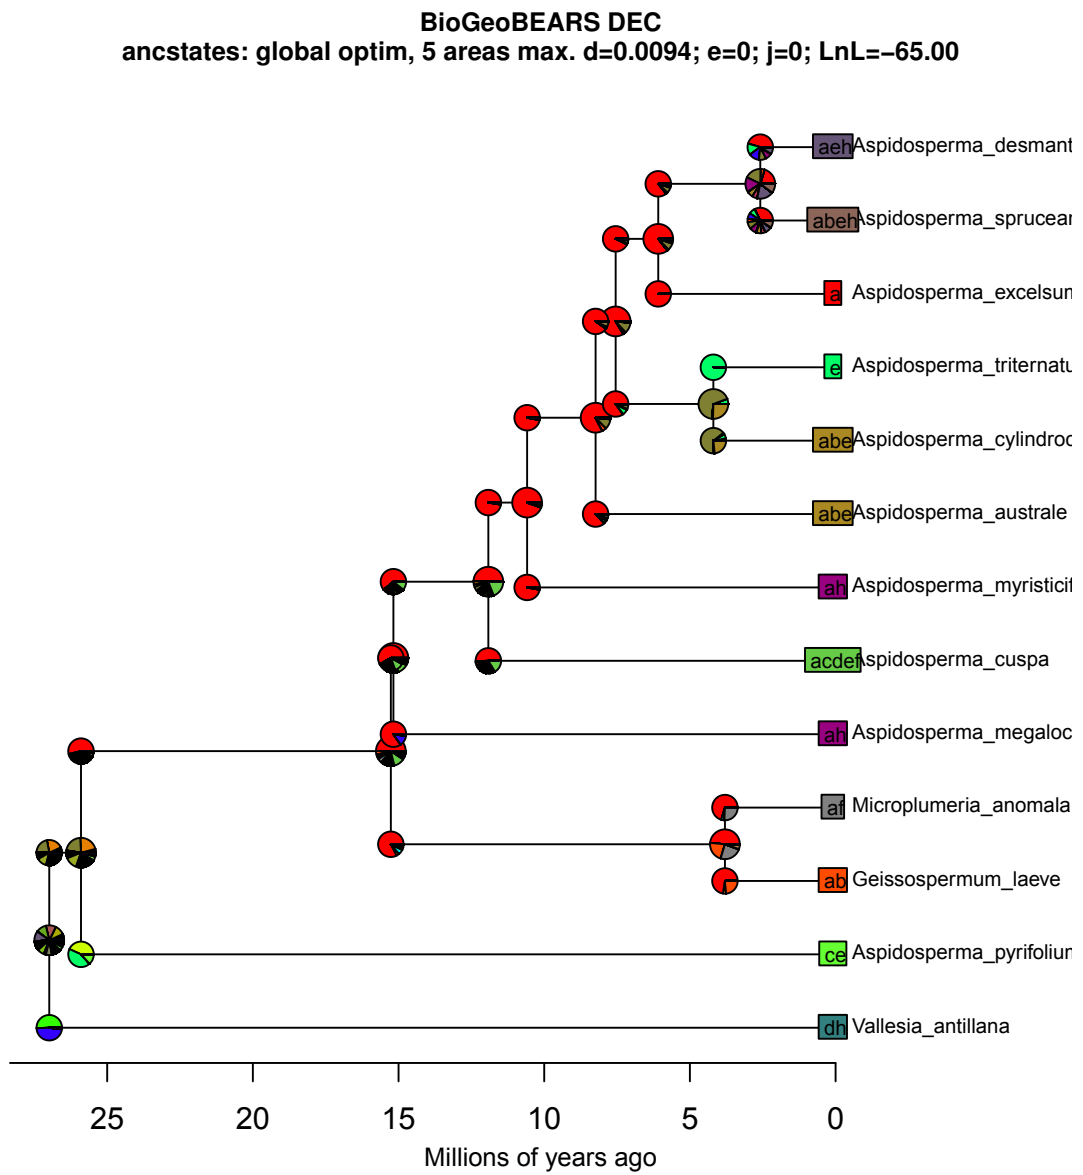

Figure S3: Clades of angiosperms

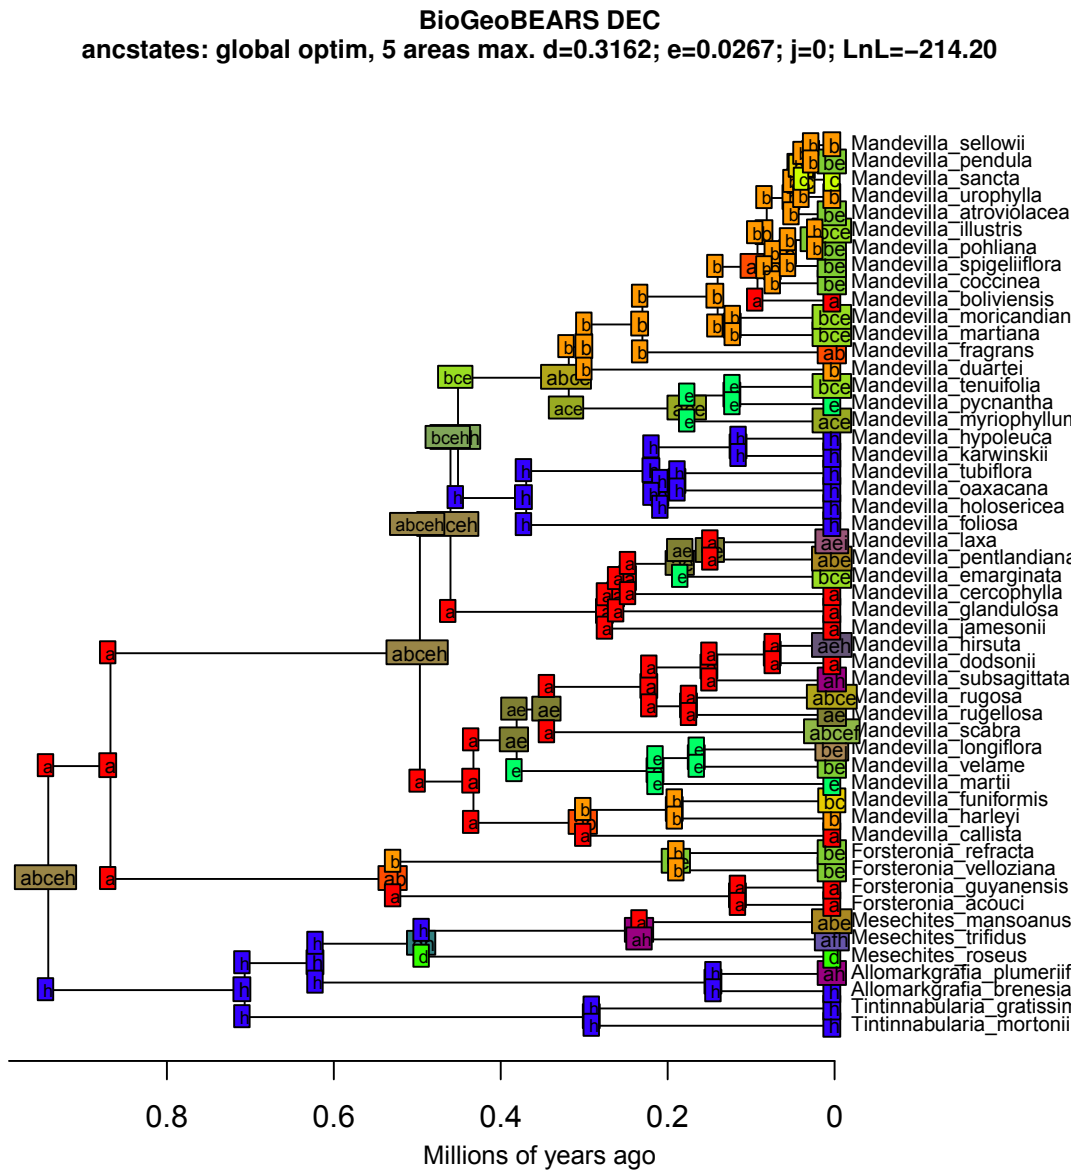

Figure S3: Clades of angiosperms

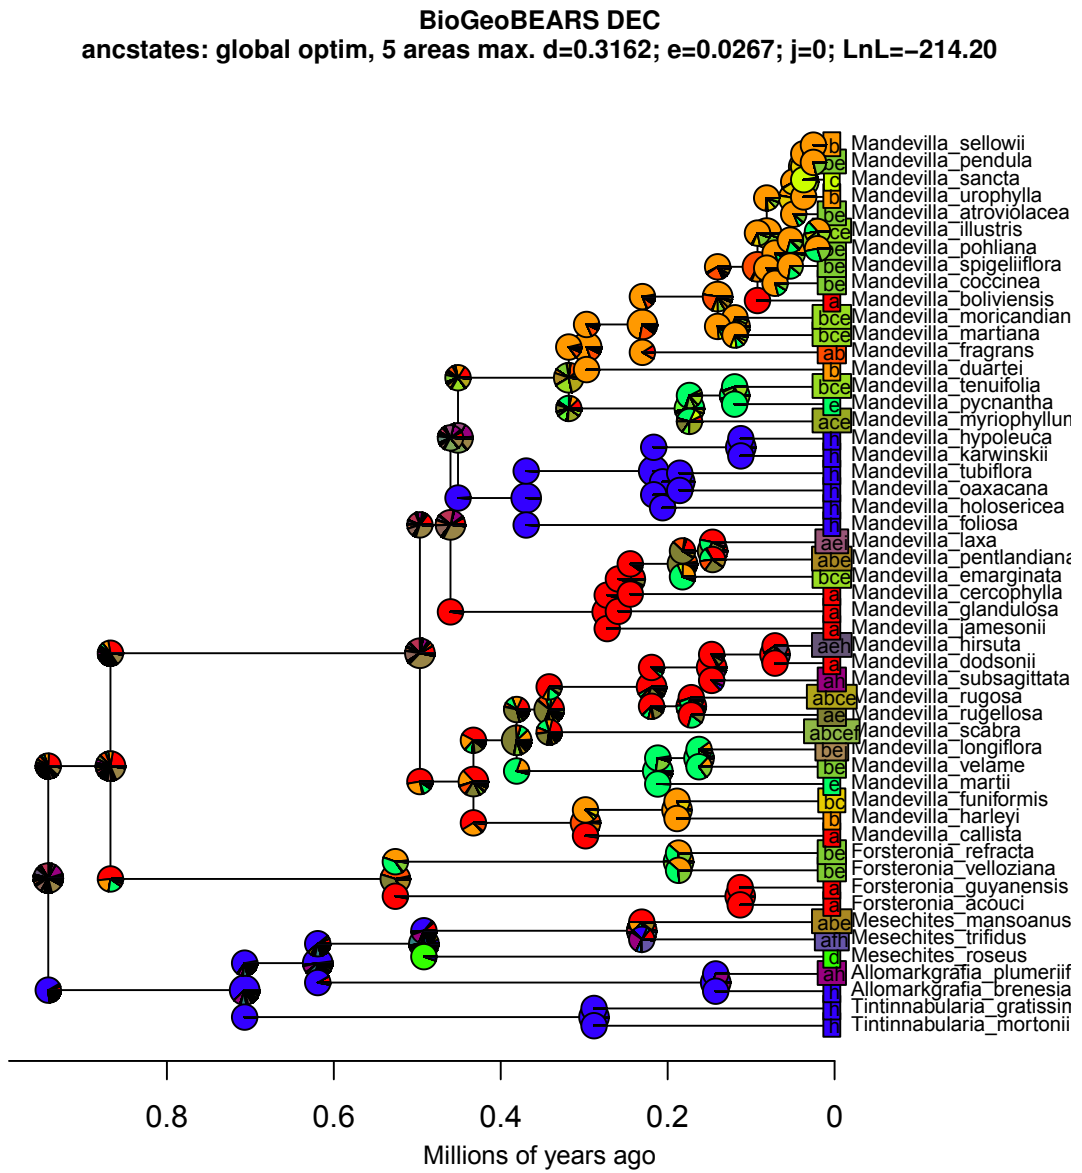

Figure S3: Clades of angiosperms

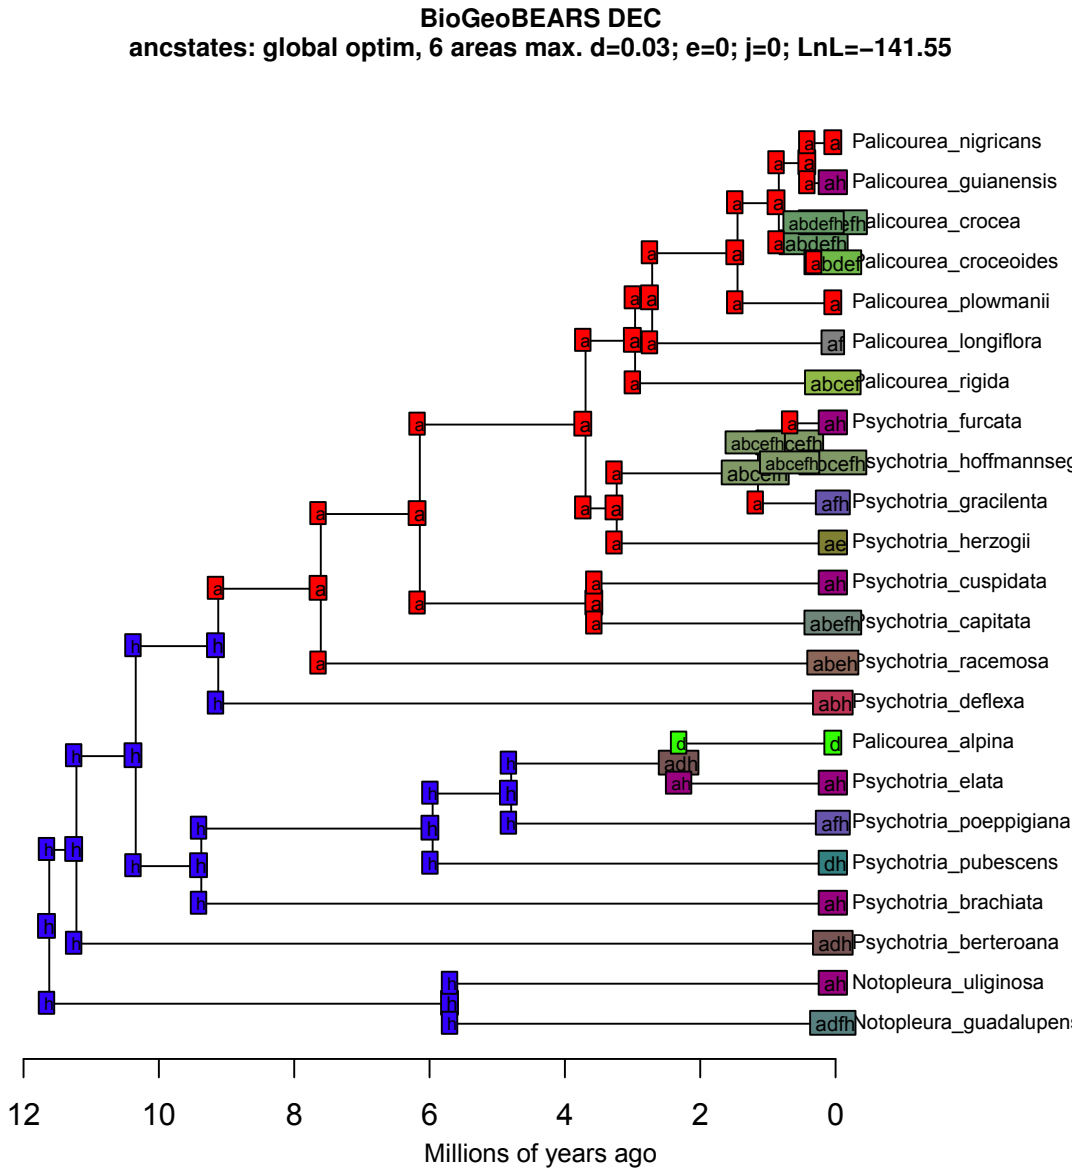



Figure S3: Clades of angiosperms

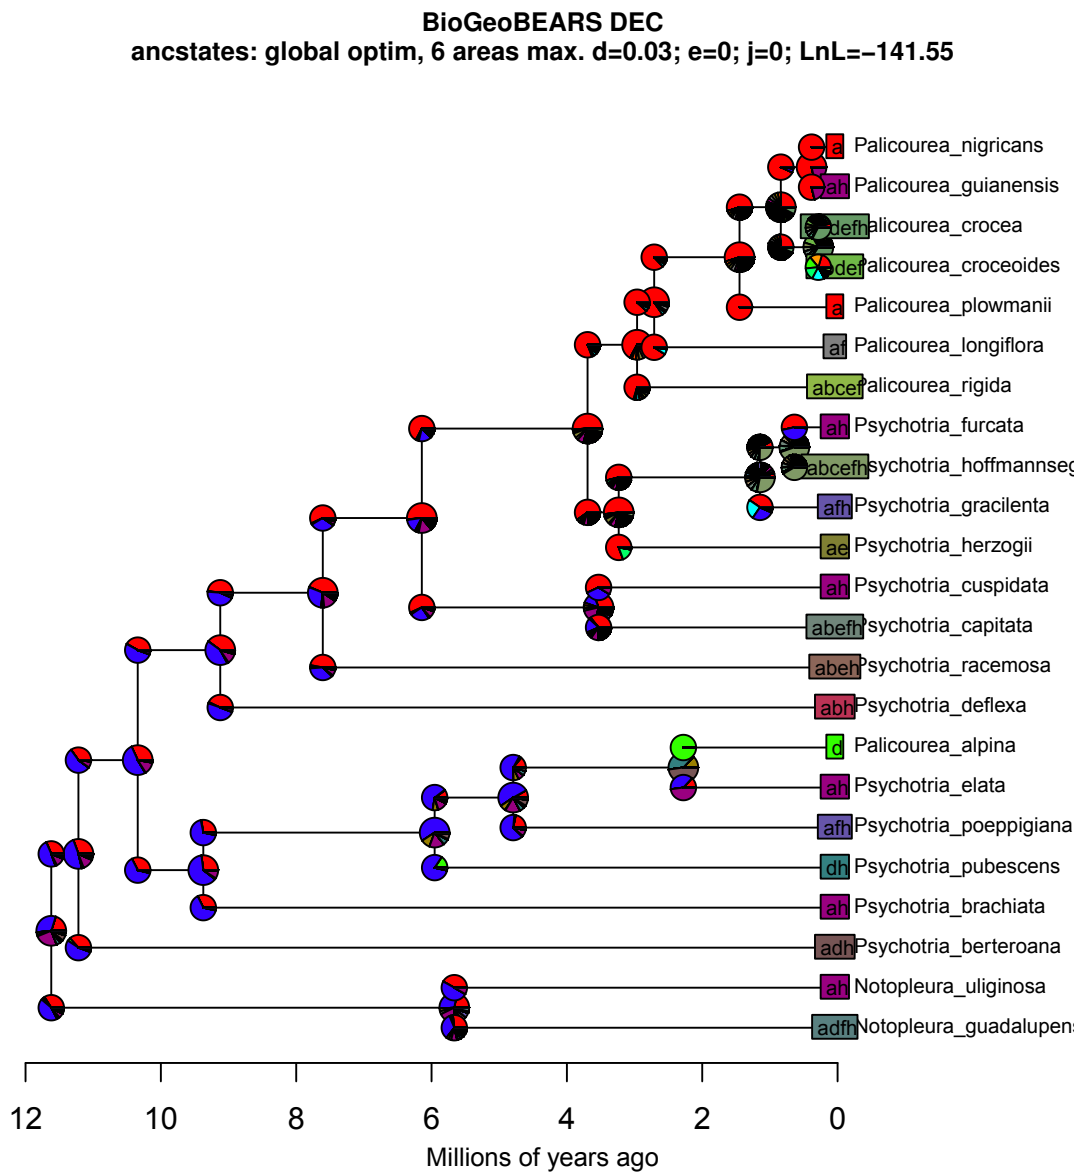

Figure S3: Clades of angiosperms

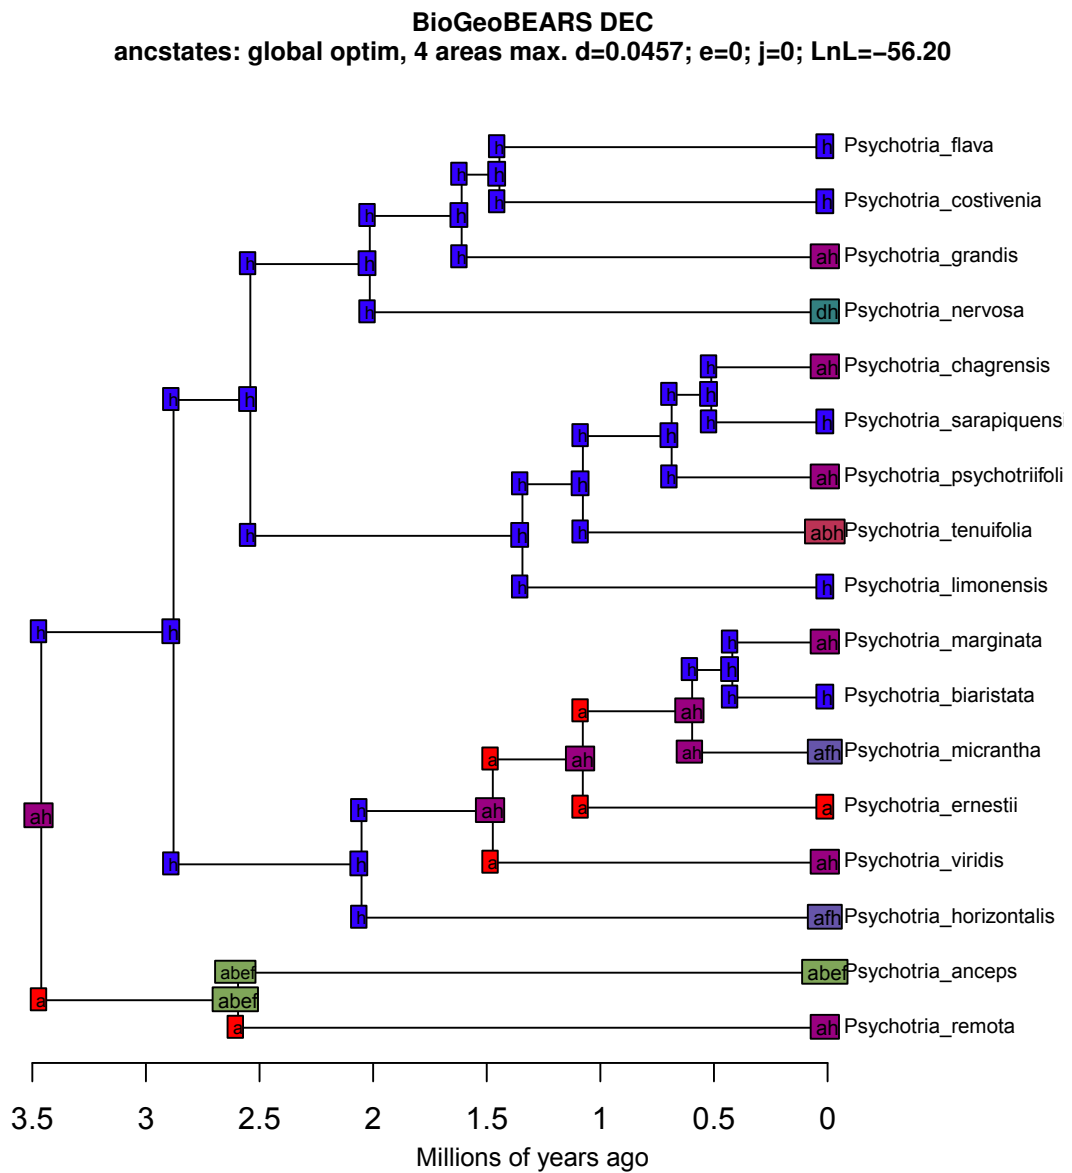

Figure S3: Clades of angiosperms

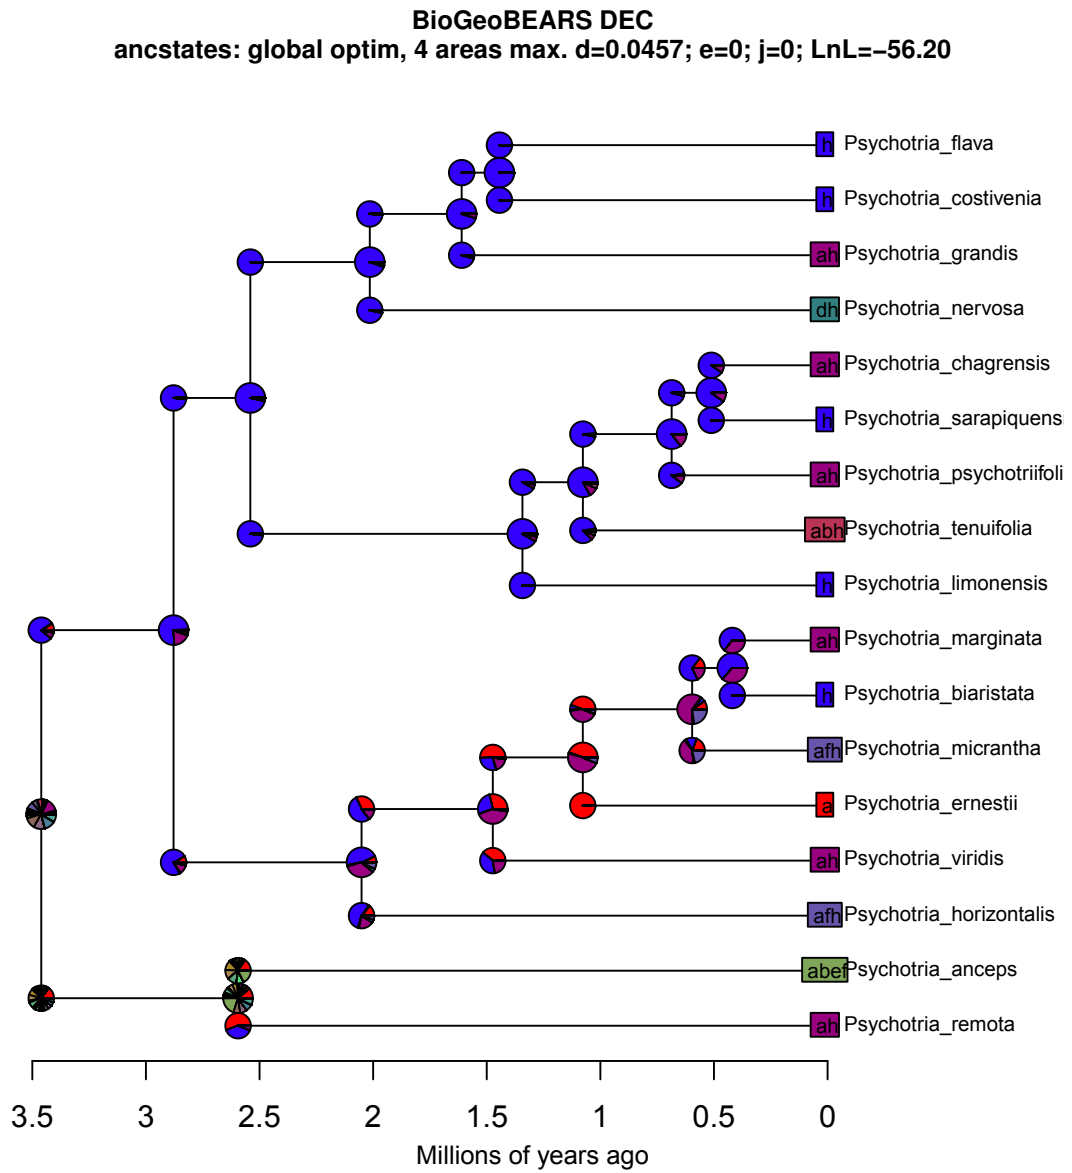

Figure S3: Clades of angiosperms

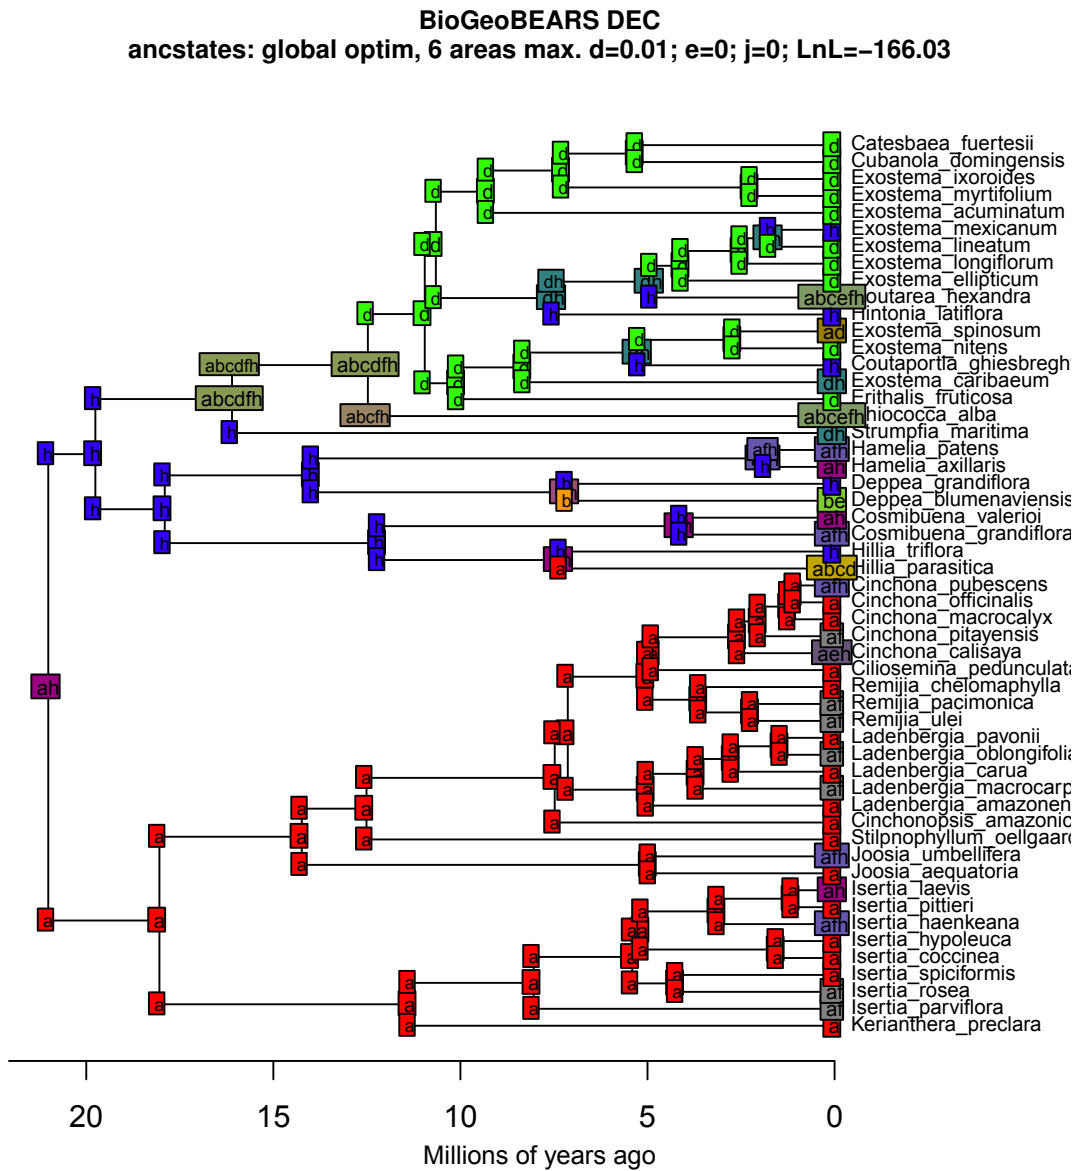

Figure S3: Clades of angiosperms

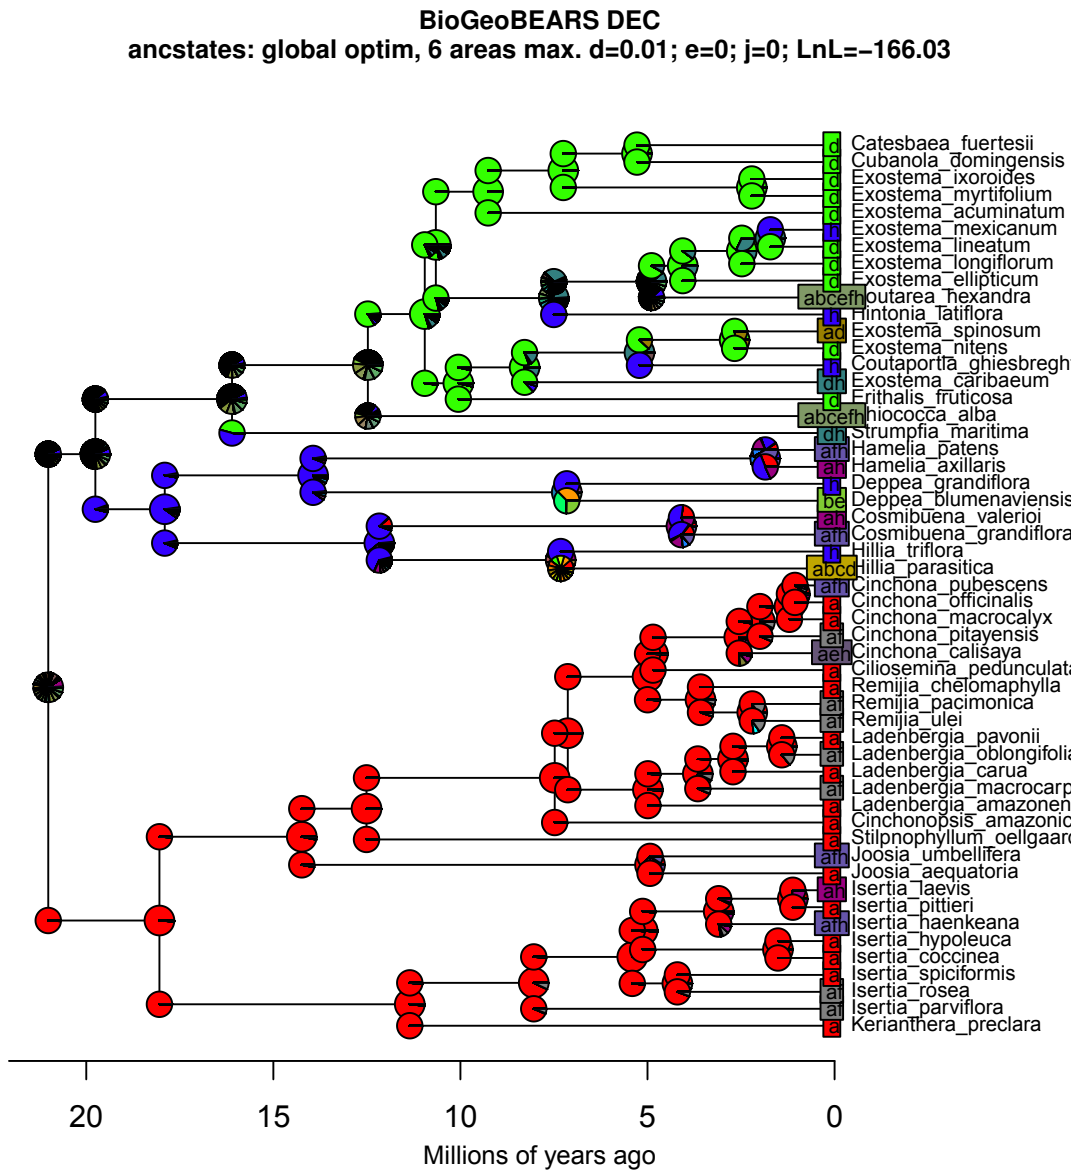

Figure S3: Clades of angiosperms

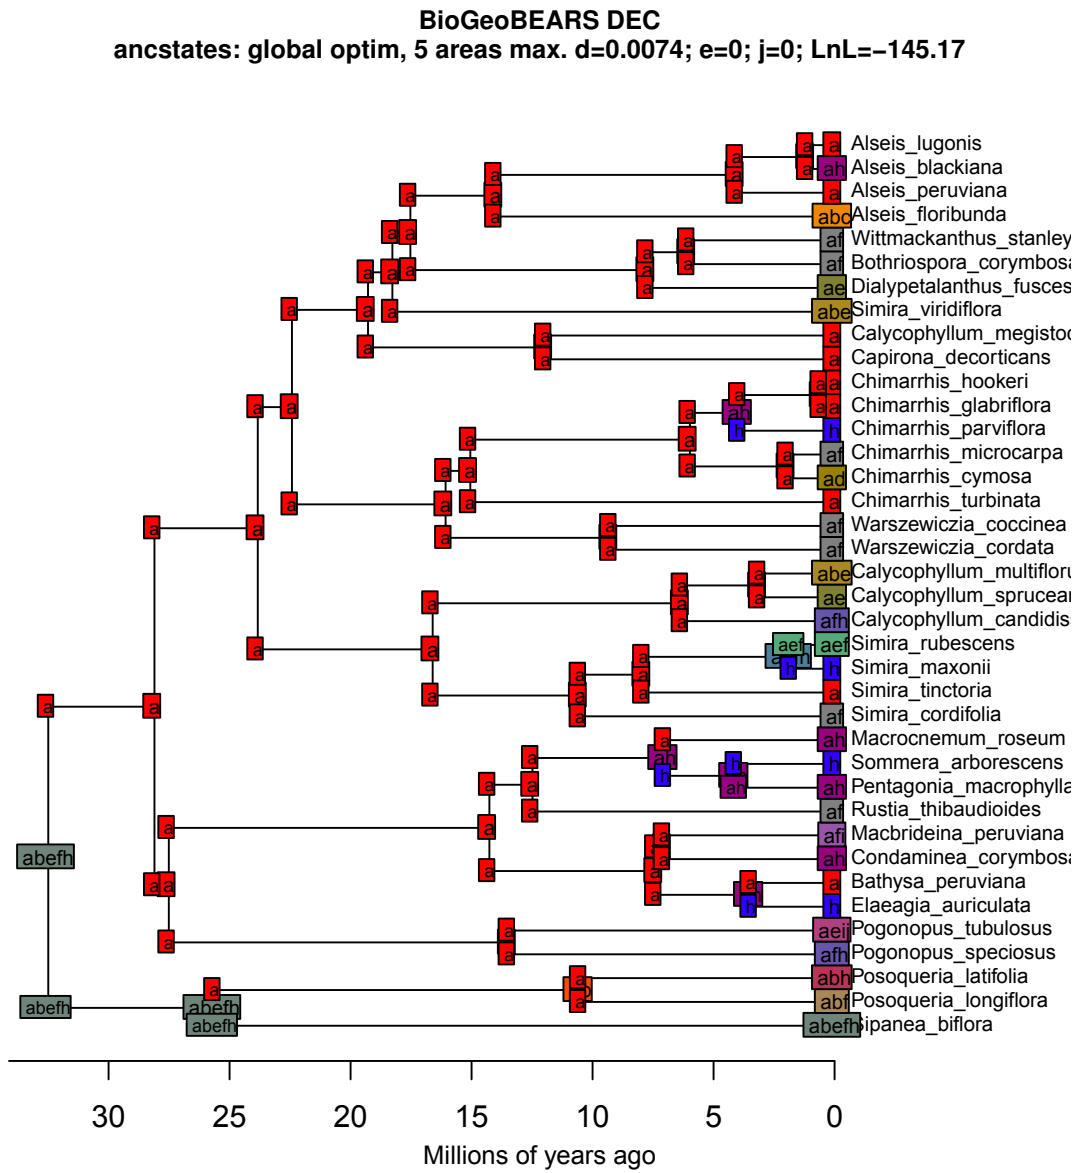

Figure S3: Clades of angiosperms

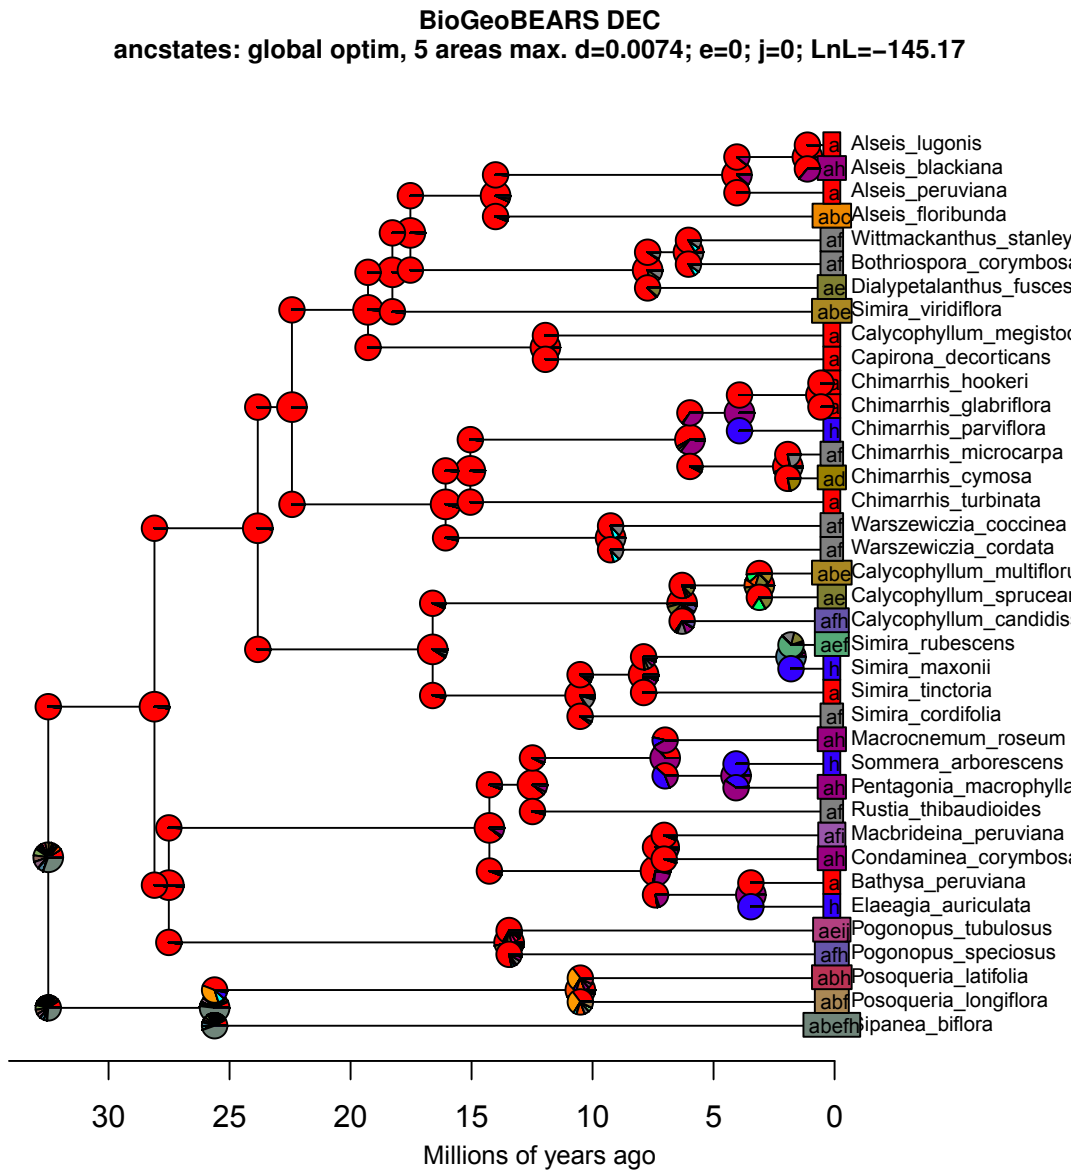

Figure S3: Clades of angiosperms

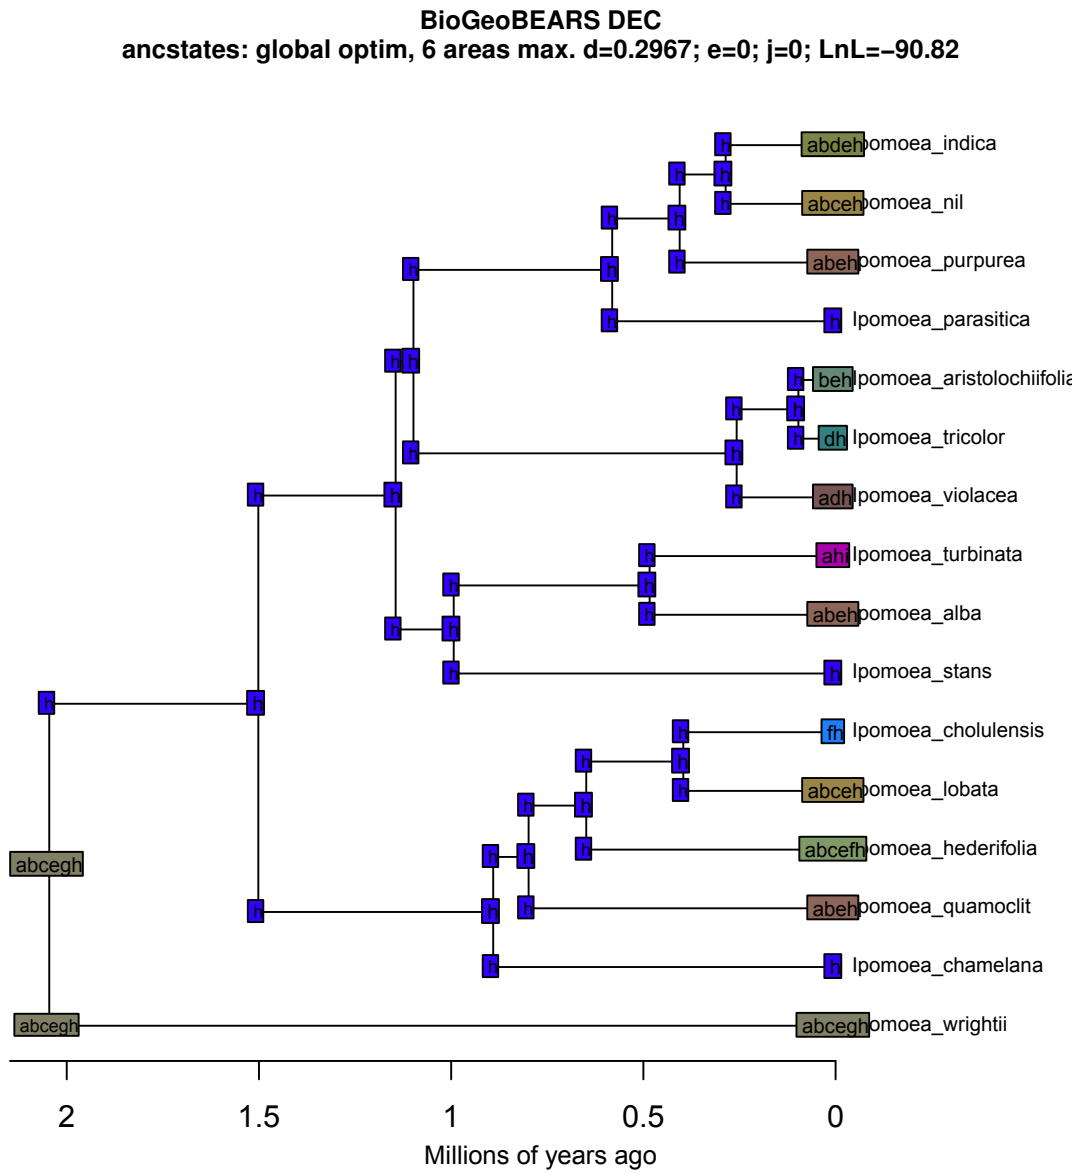



Figure S3: Clades of angiosperms

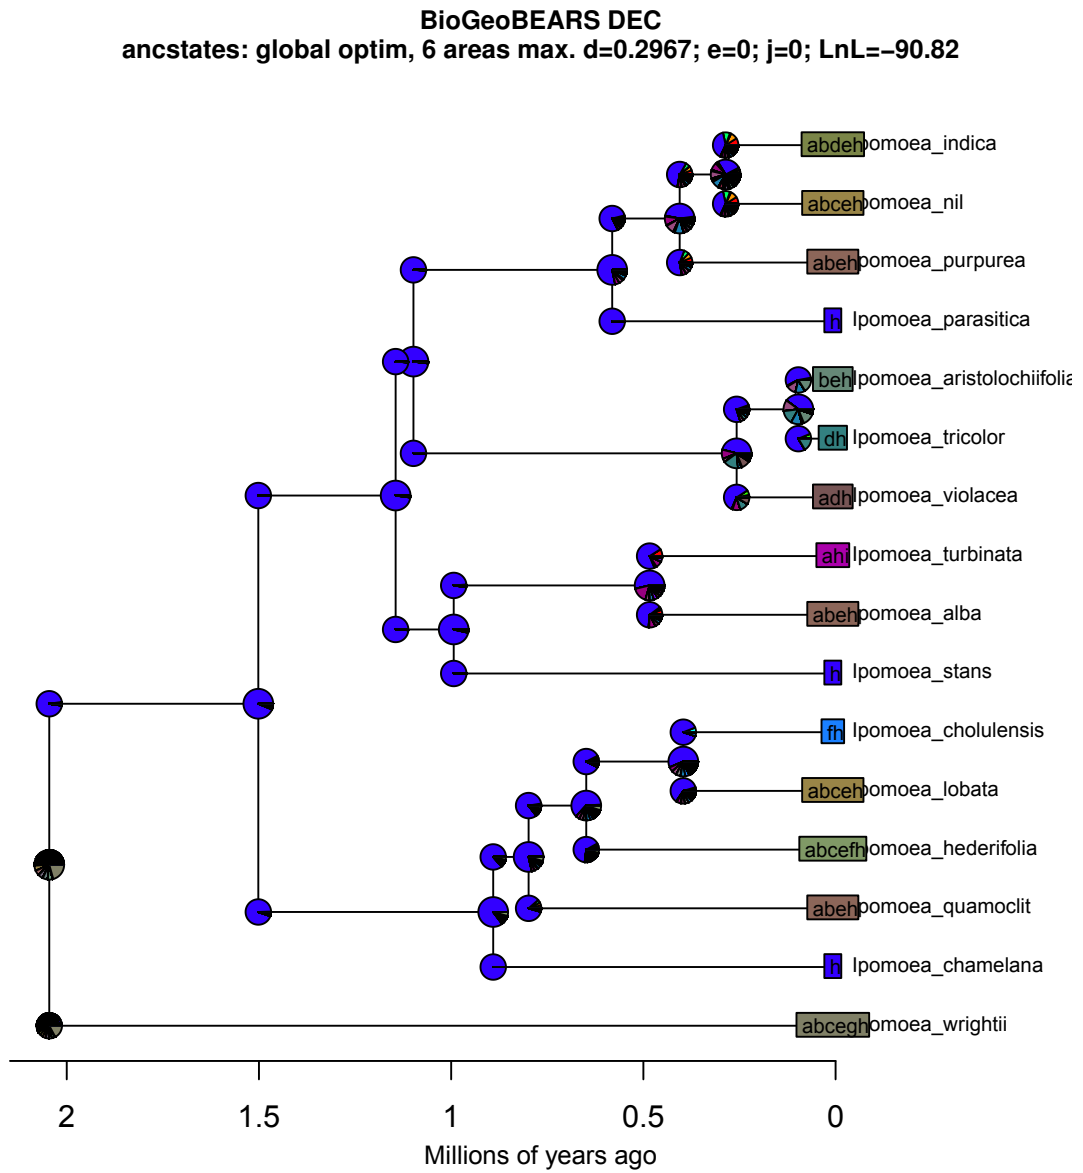

Figure S3: Clades of angiosperms

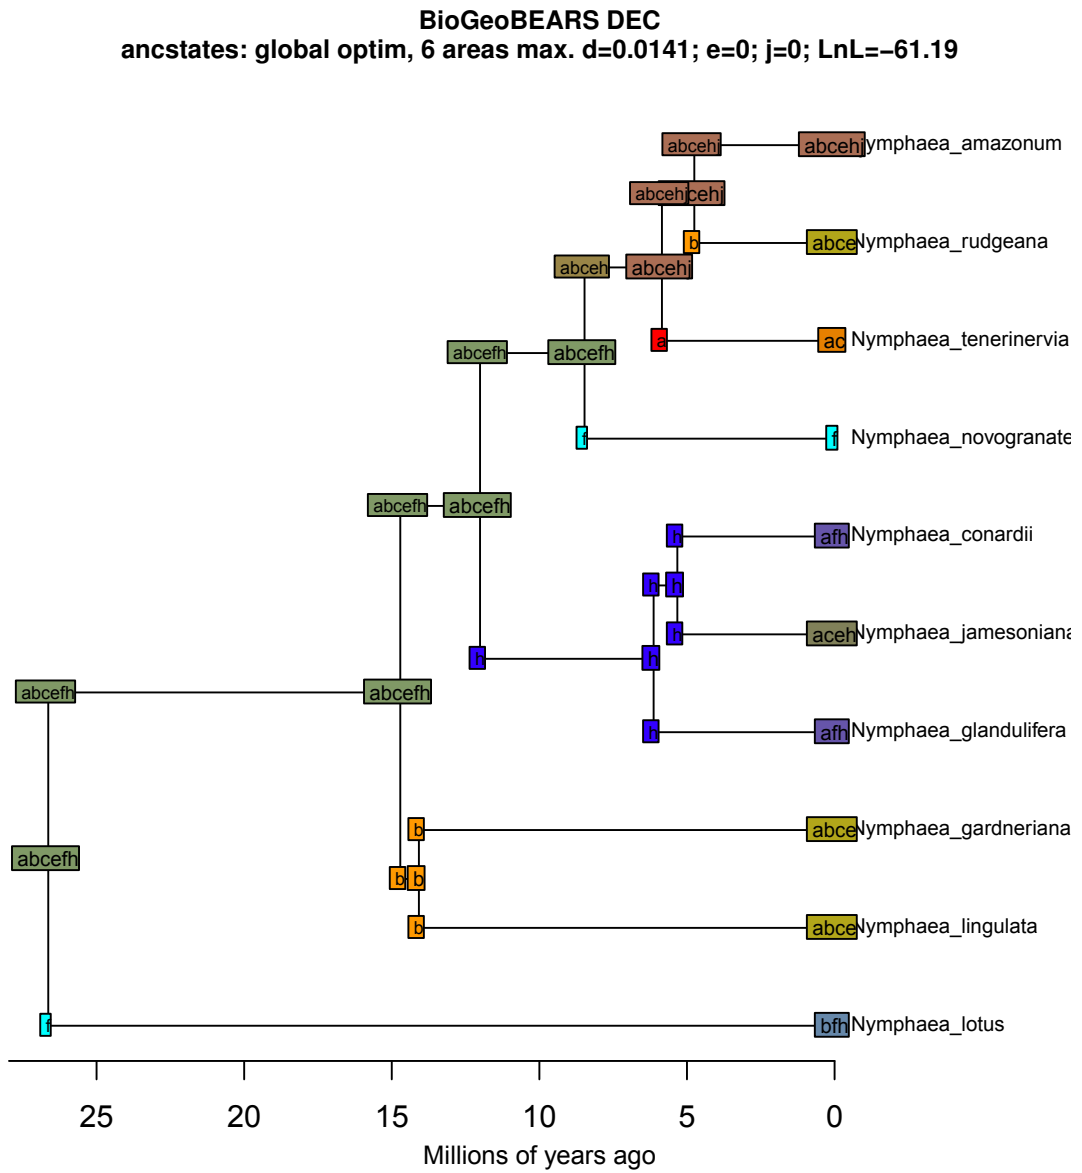

Figure S3: Clades of angiosperms

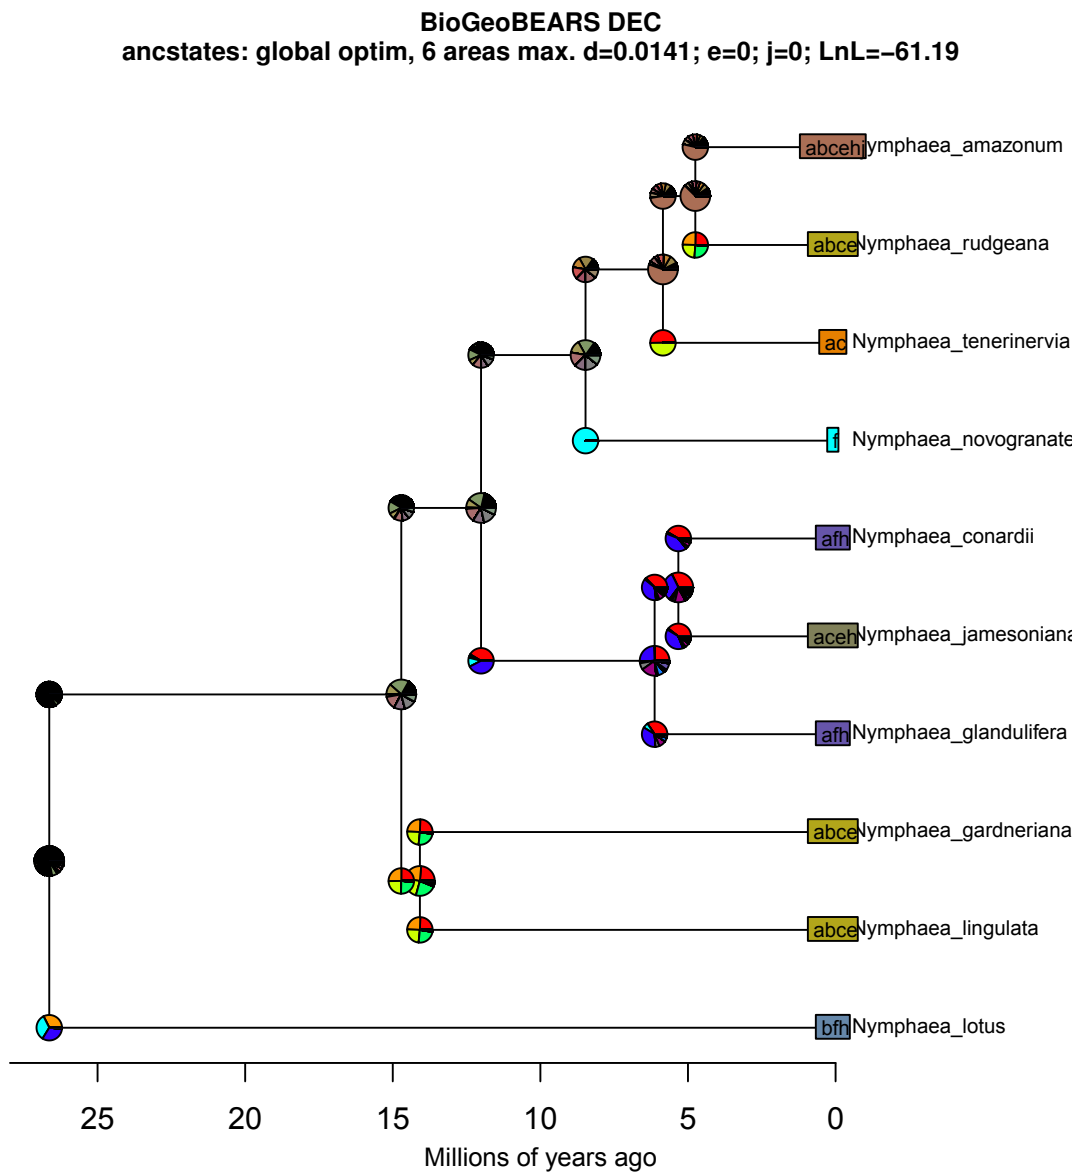

Figure S3: Clades of angiosperms

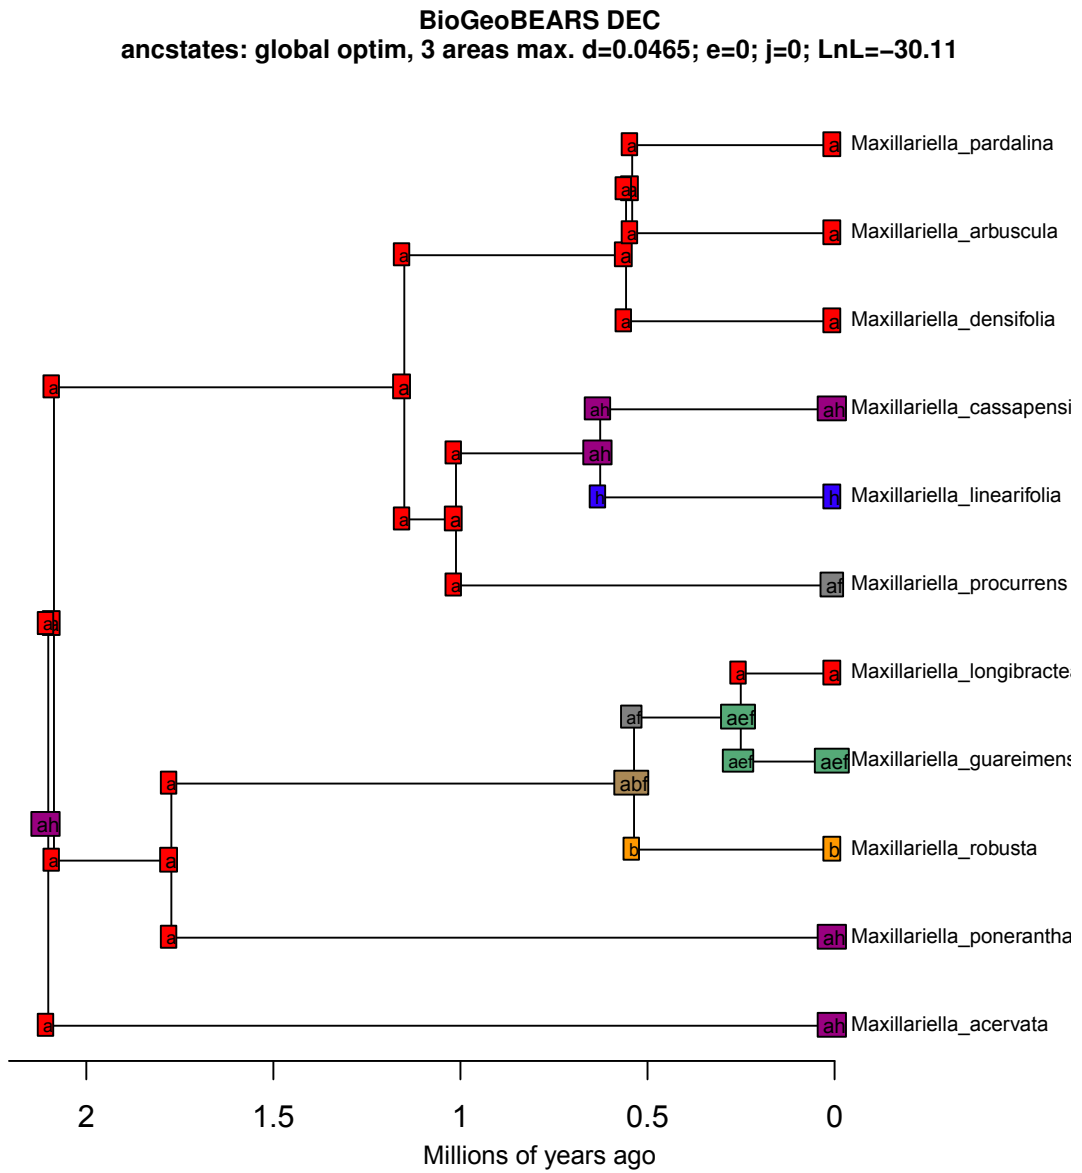

Figure S3: Clades of angiosperms

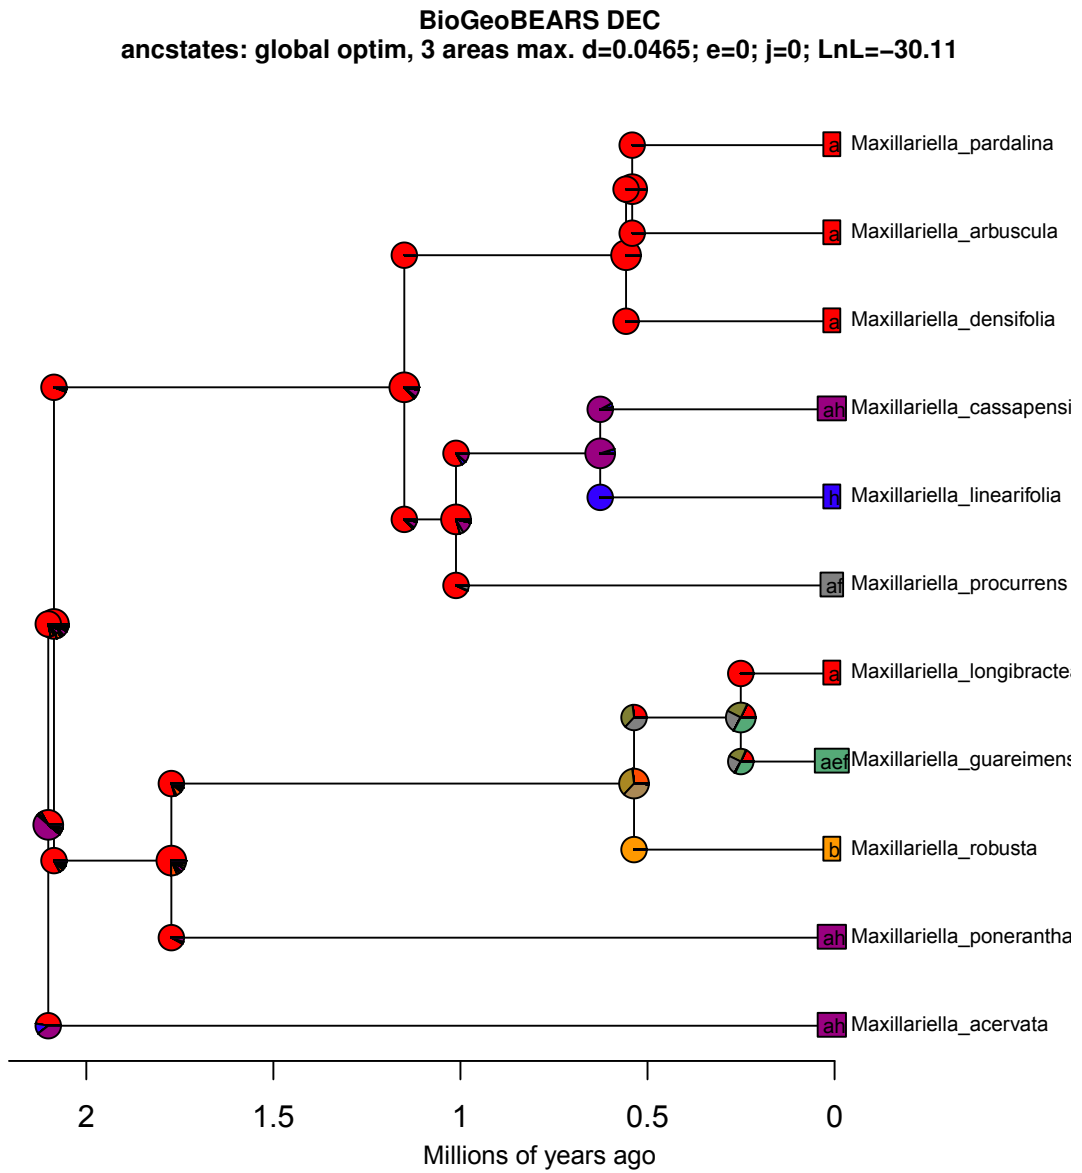

Figure S3: Clades of angiosperms

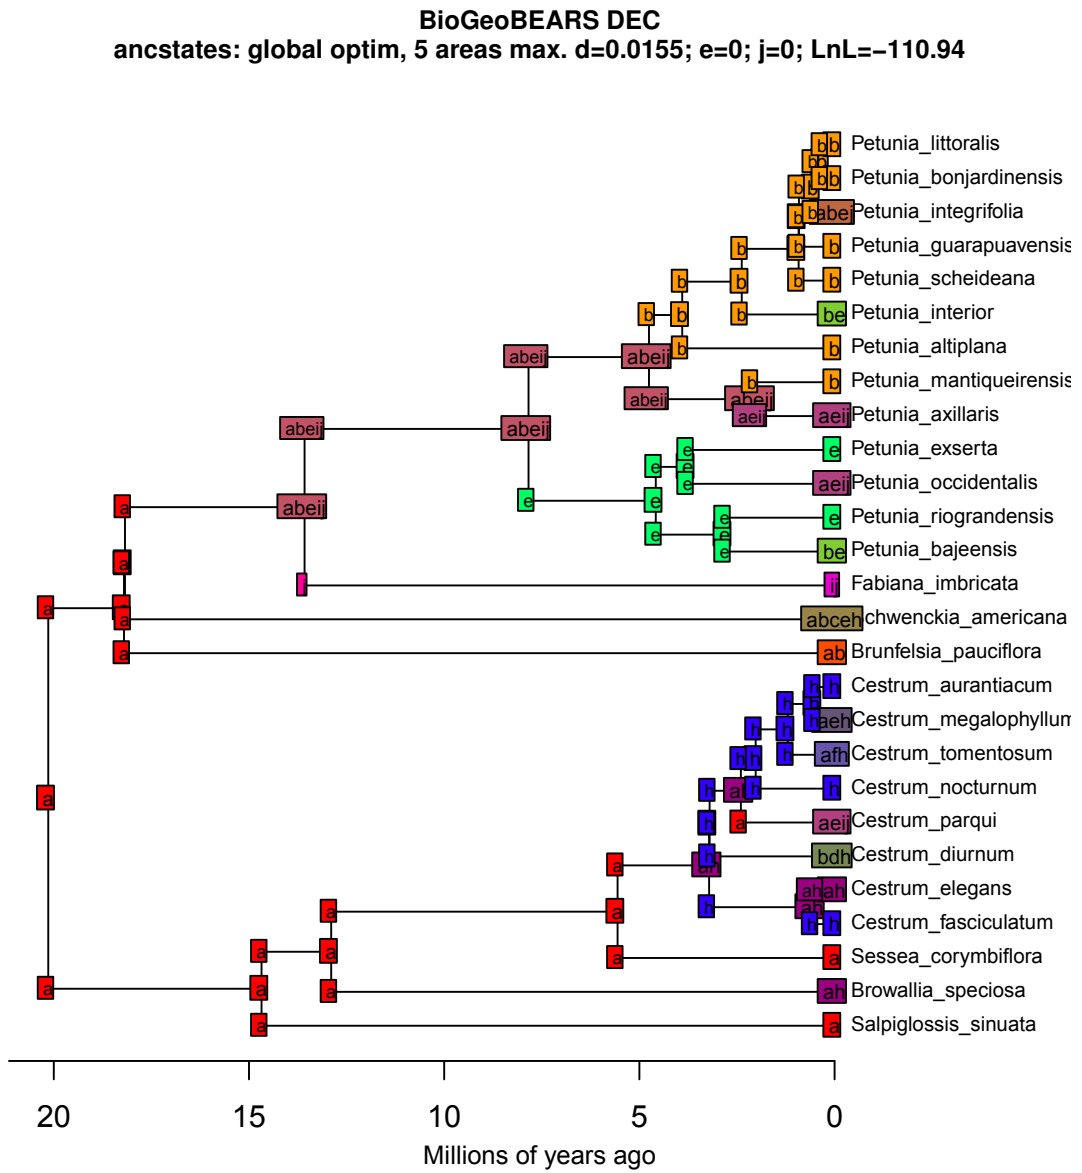

Figure S3: Clades of angiosperms

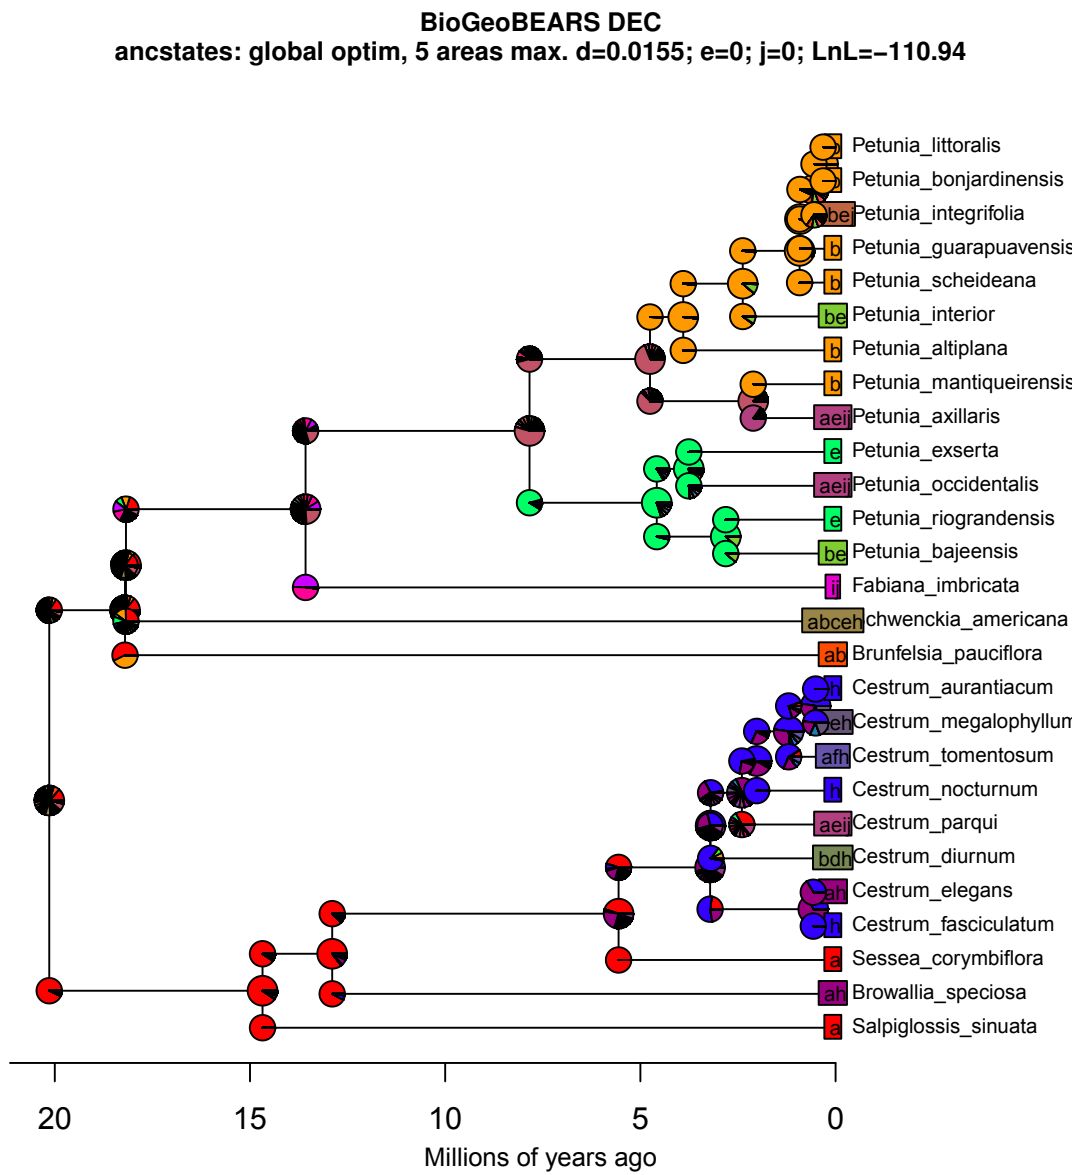

Figure S3: Clades of angiosperms

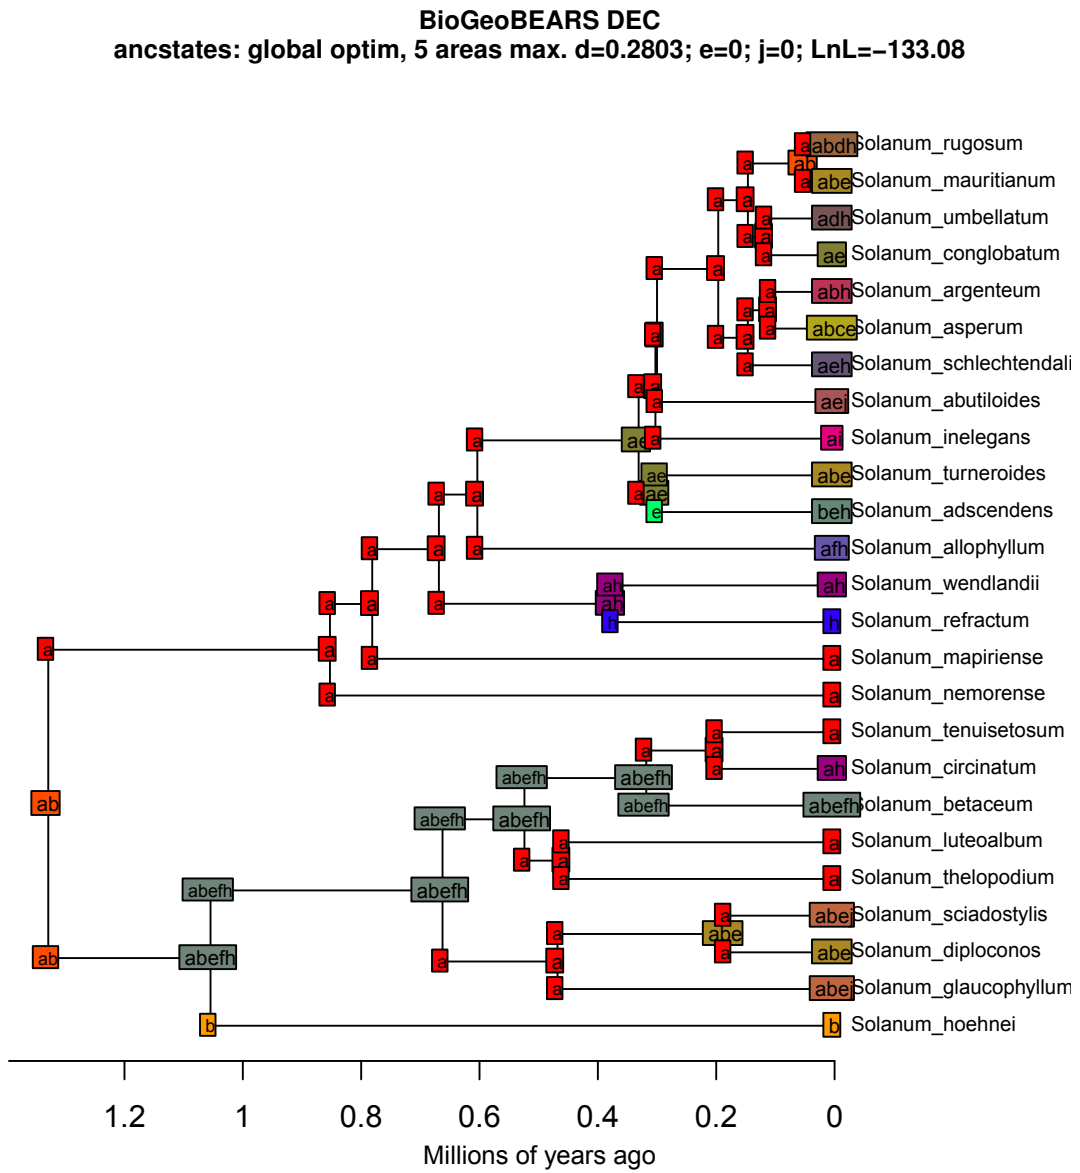



Figure S3: Clades of angiosperms

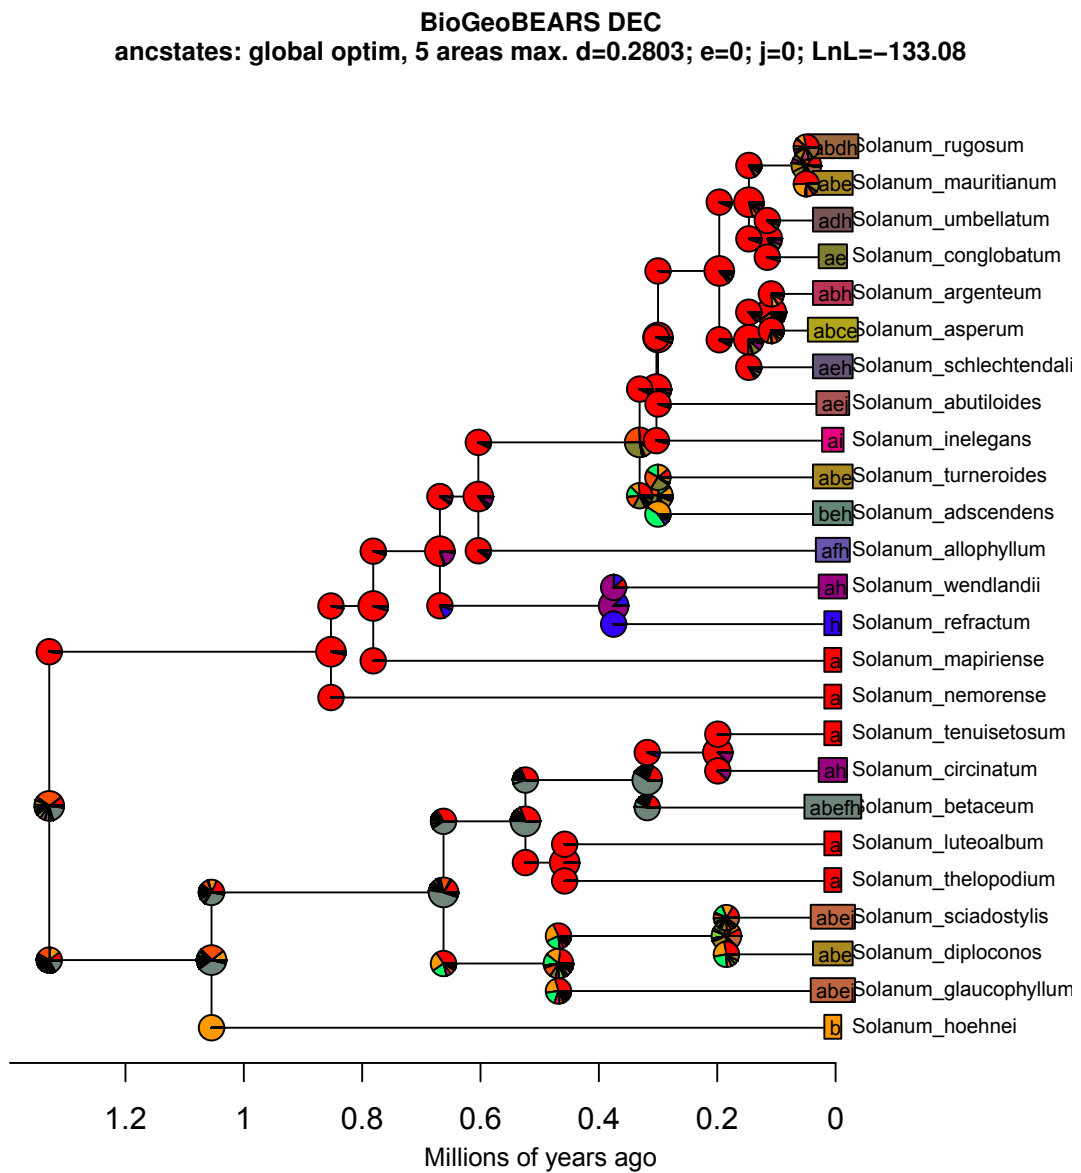

Figure S3: Clades of angiosperms

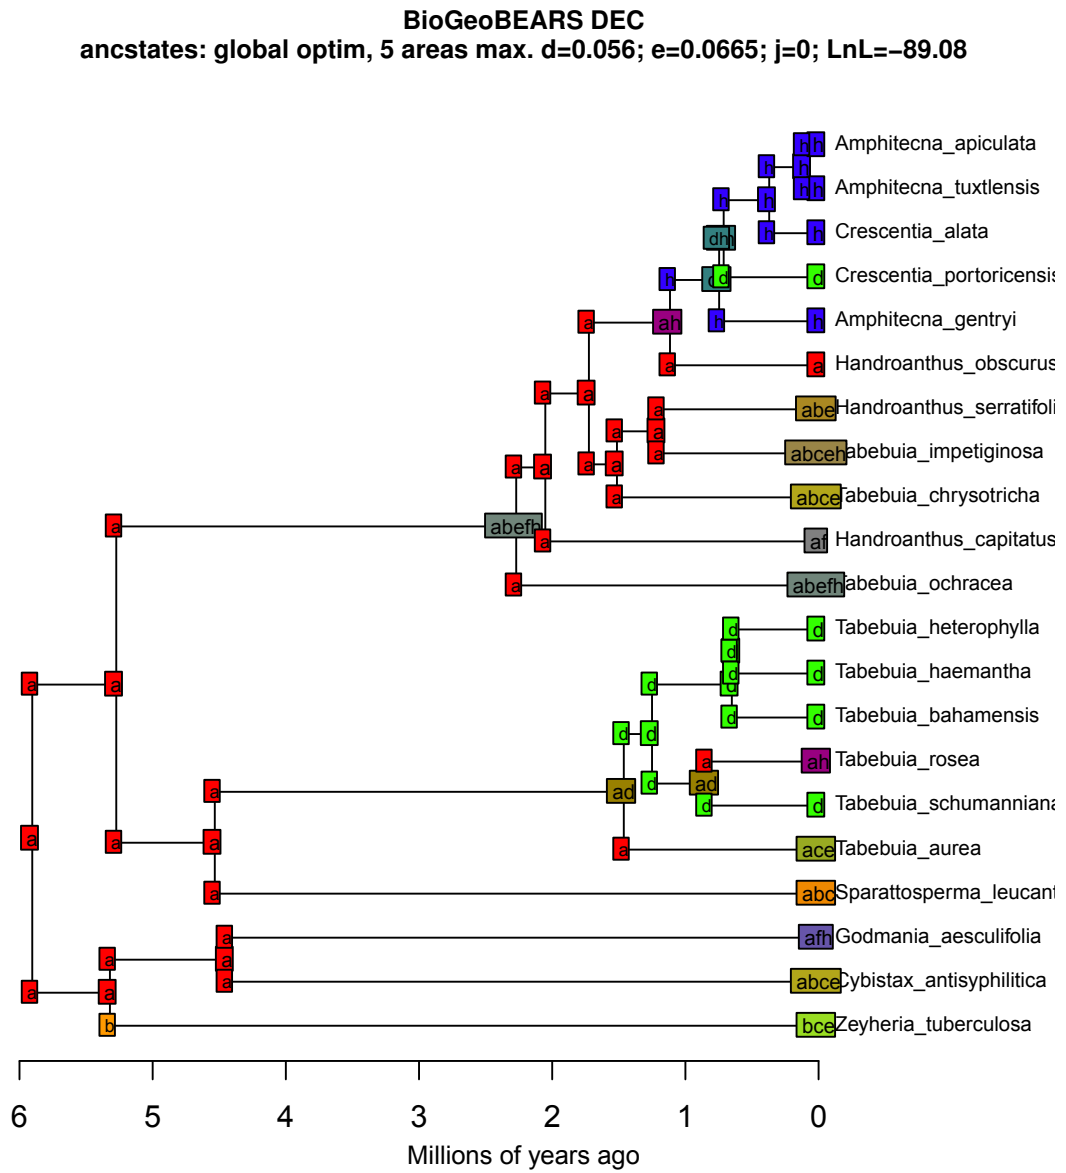

Figure S3: Clades of angiosperms

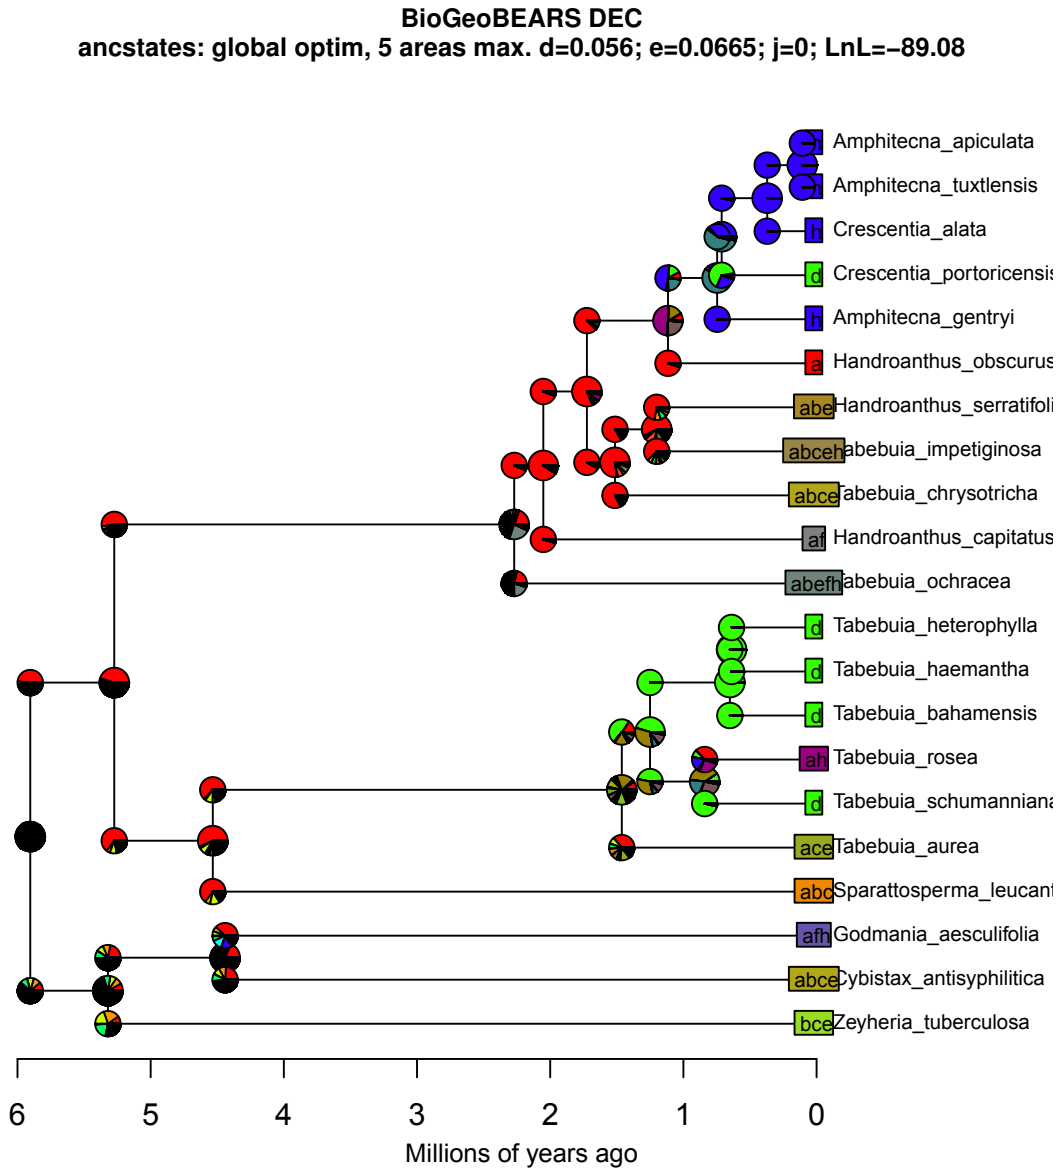

Figure S3: Clades of angiosperms

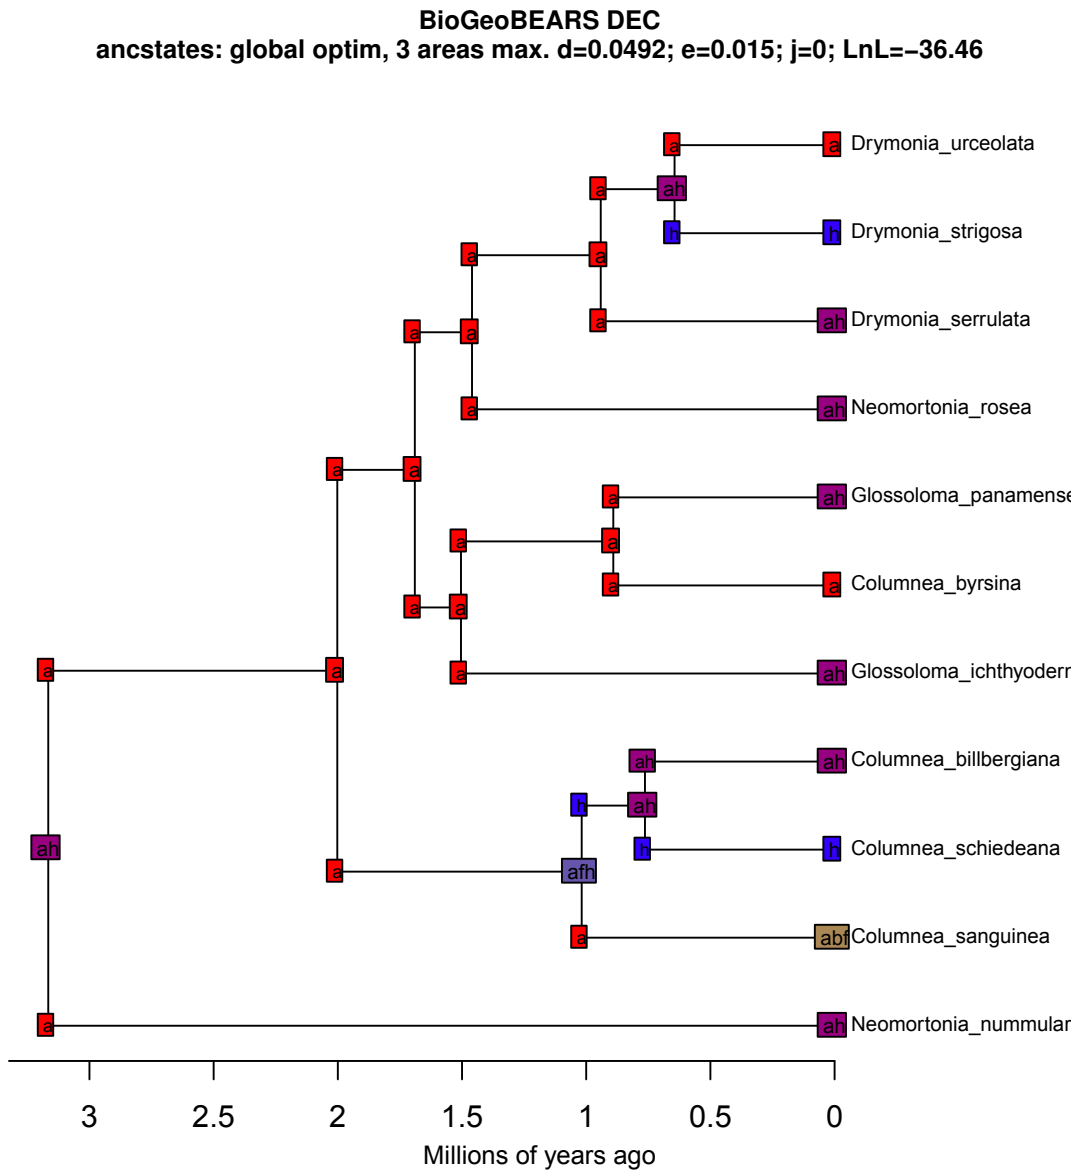

Figure S3: Clades of angiosperms

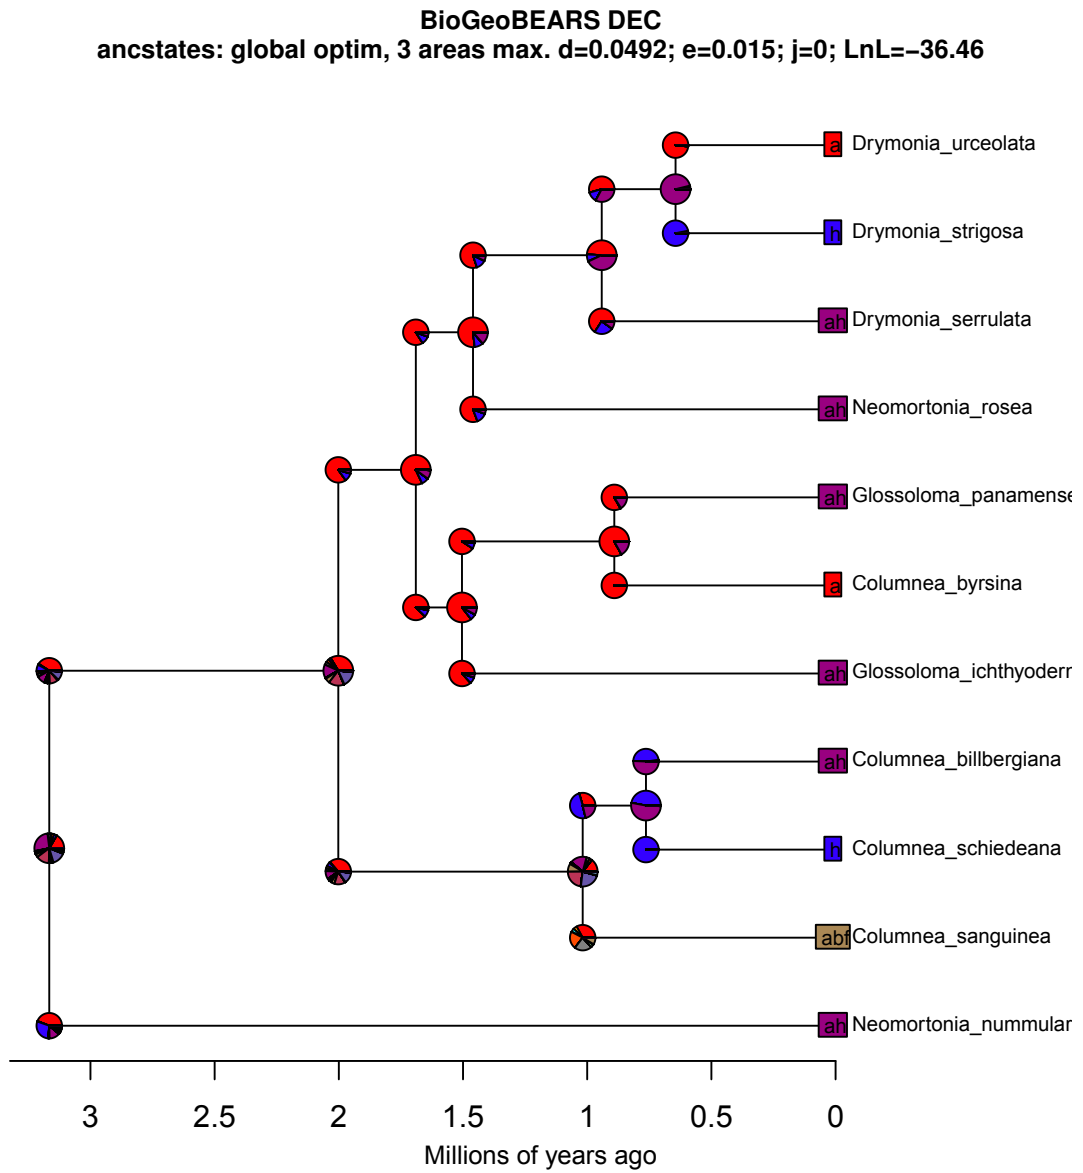

Figure S3: Clades of angiosperms

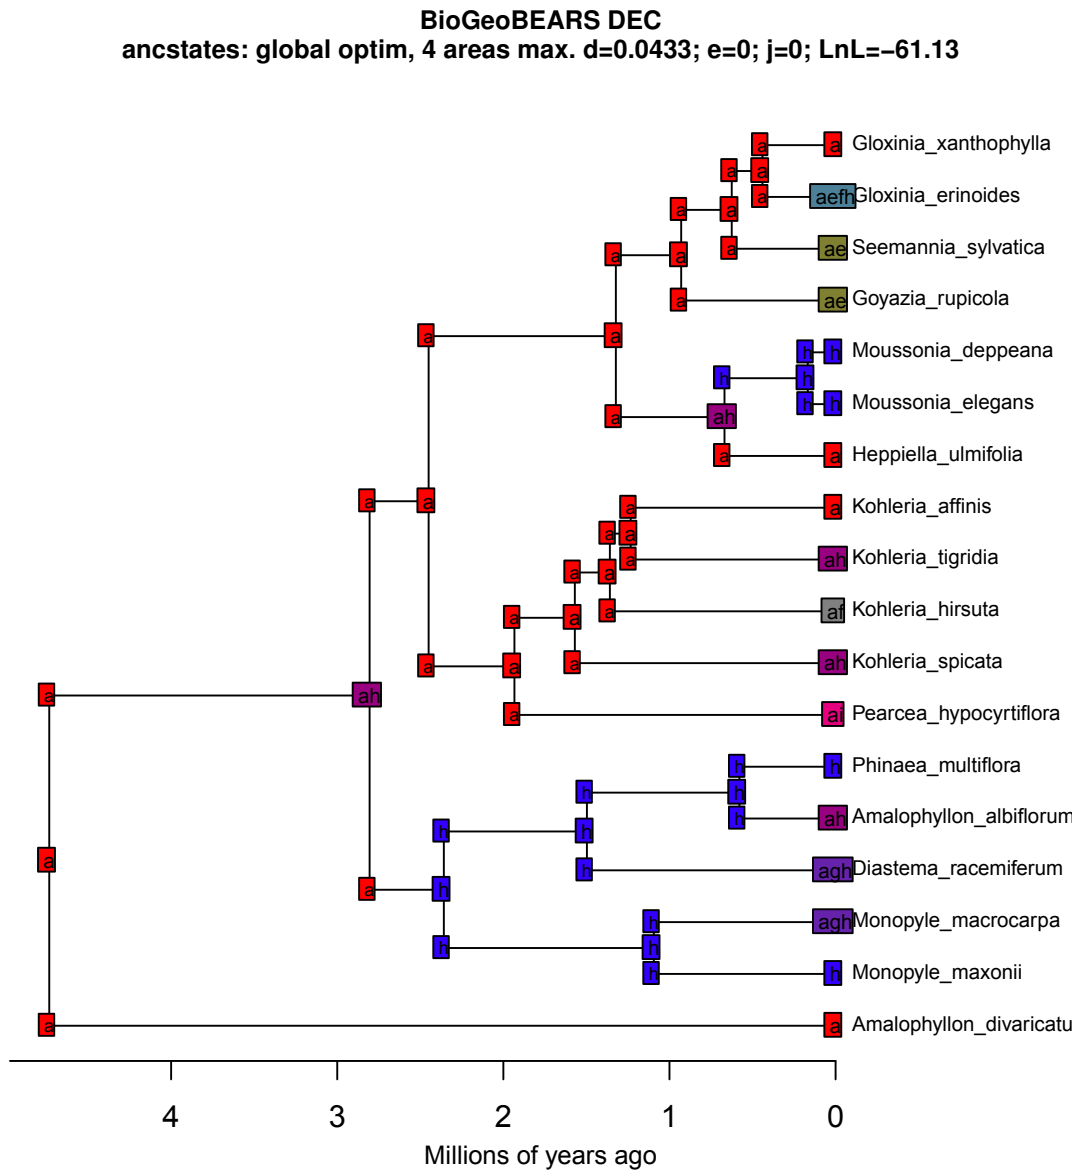

Figure S3: Clades of angiosperms

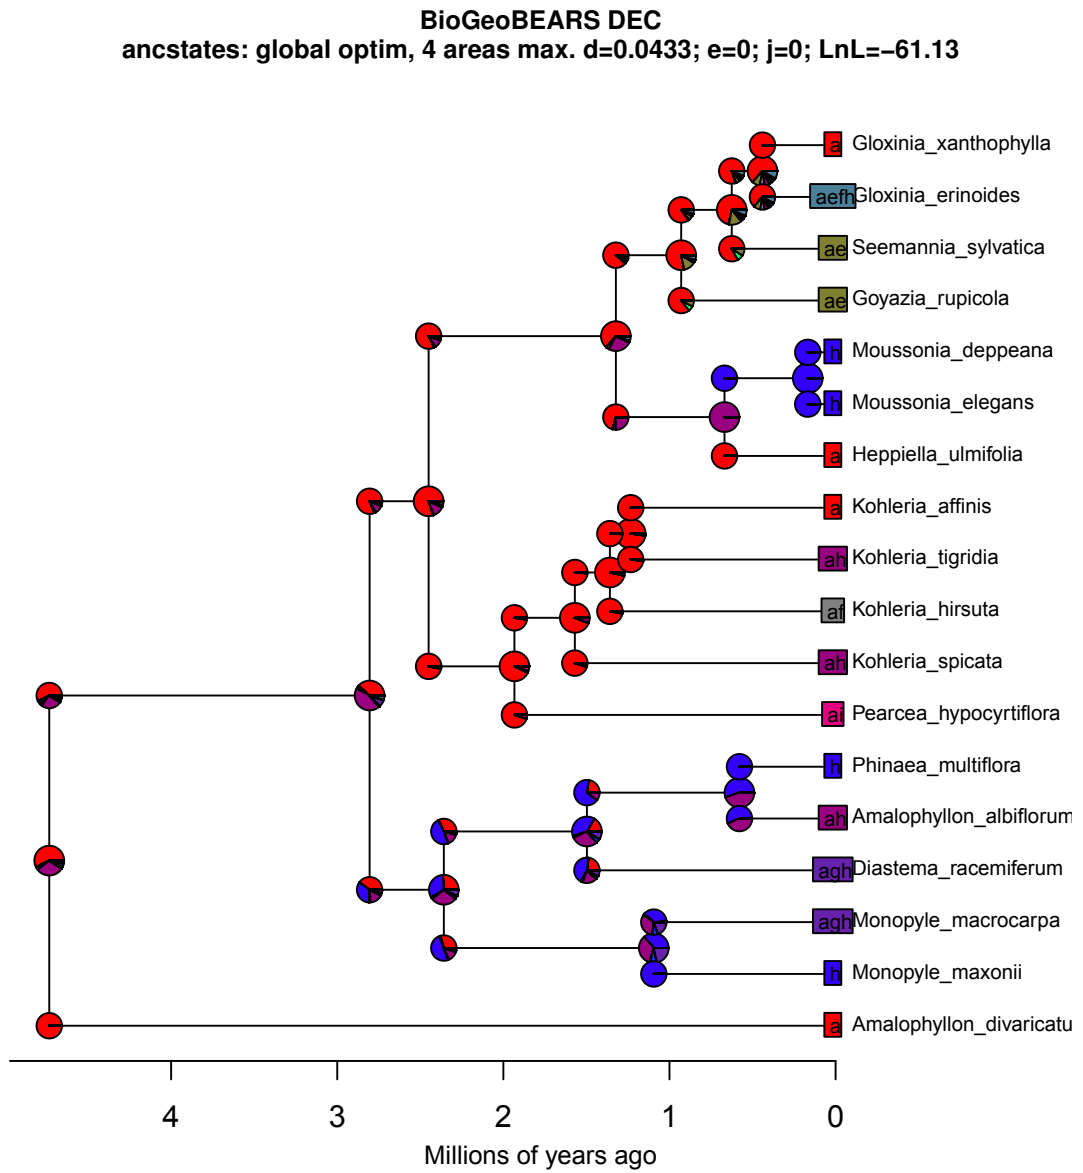

Figure S3: Clades of angiosperms

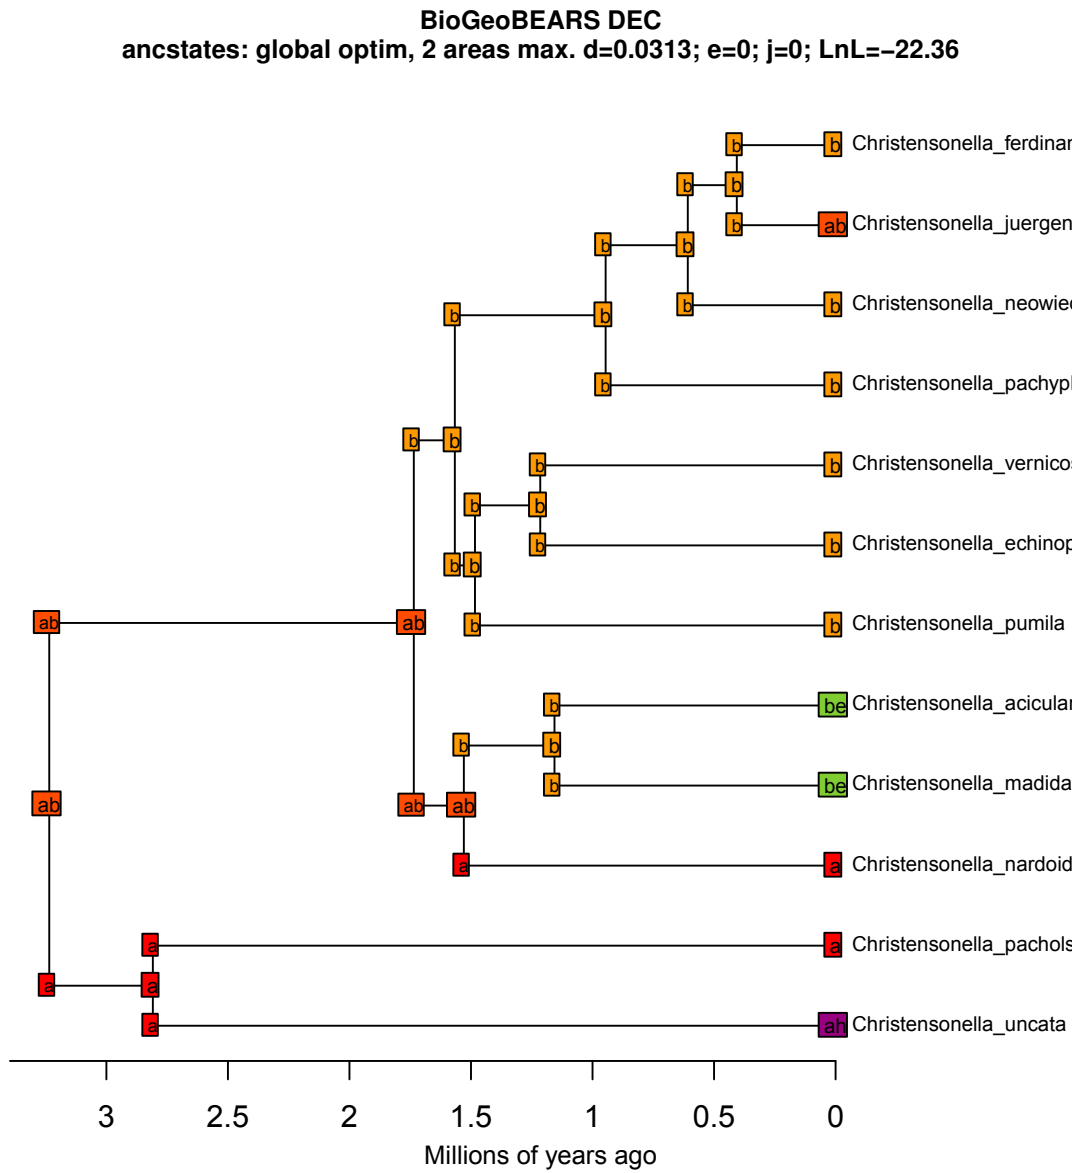



Figure S3: Clades of angiosperms

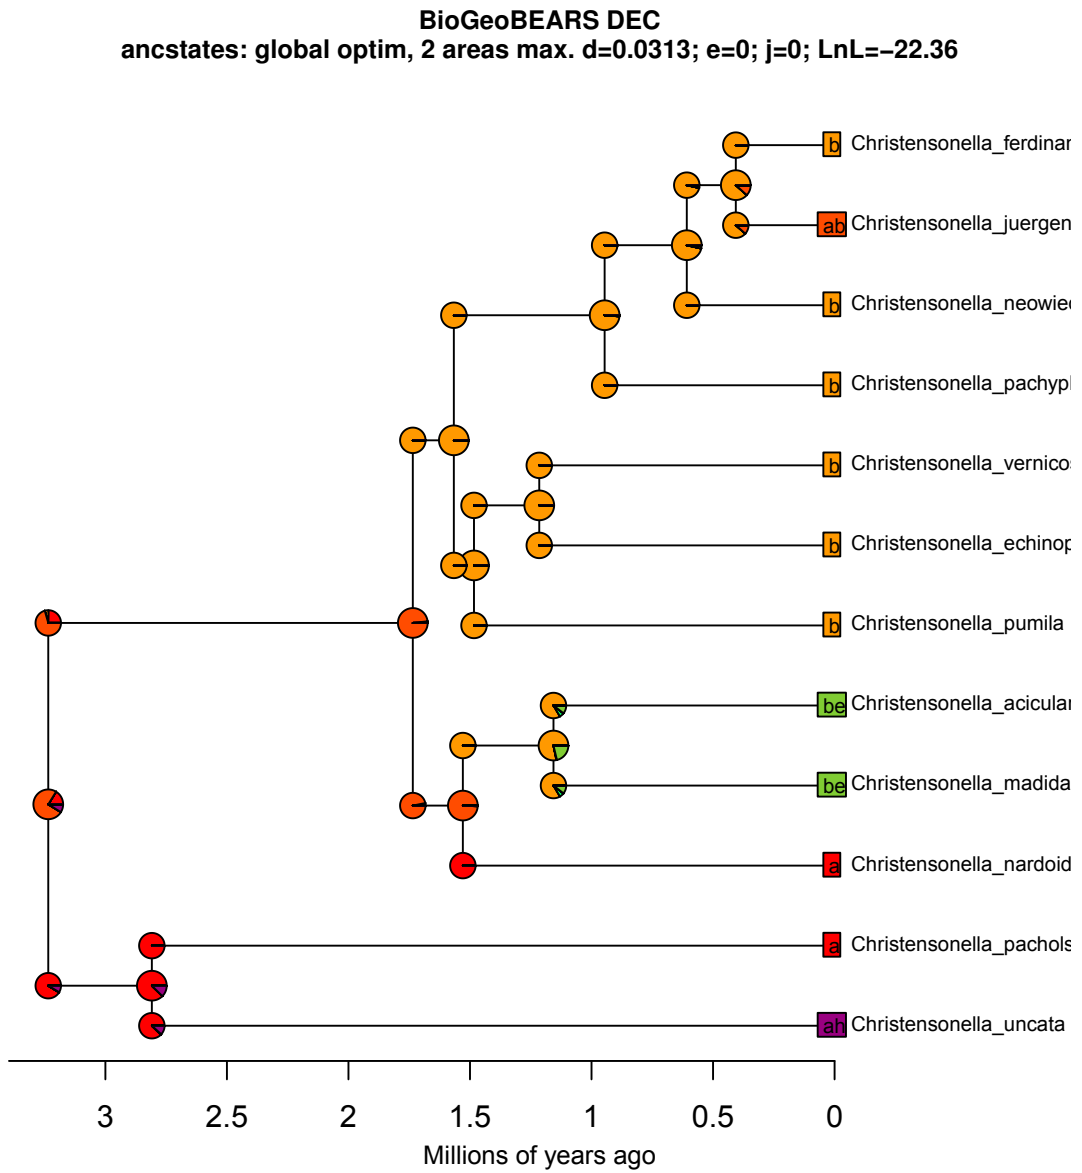

Figure S3: Clades of angiosperms

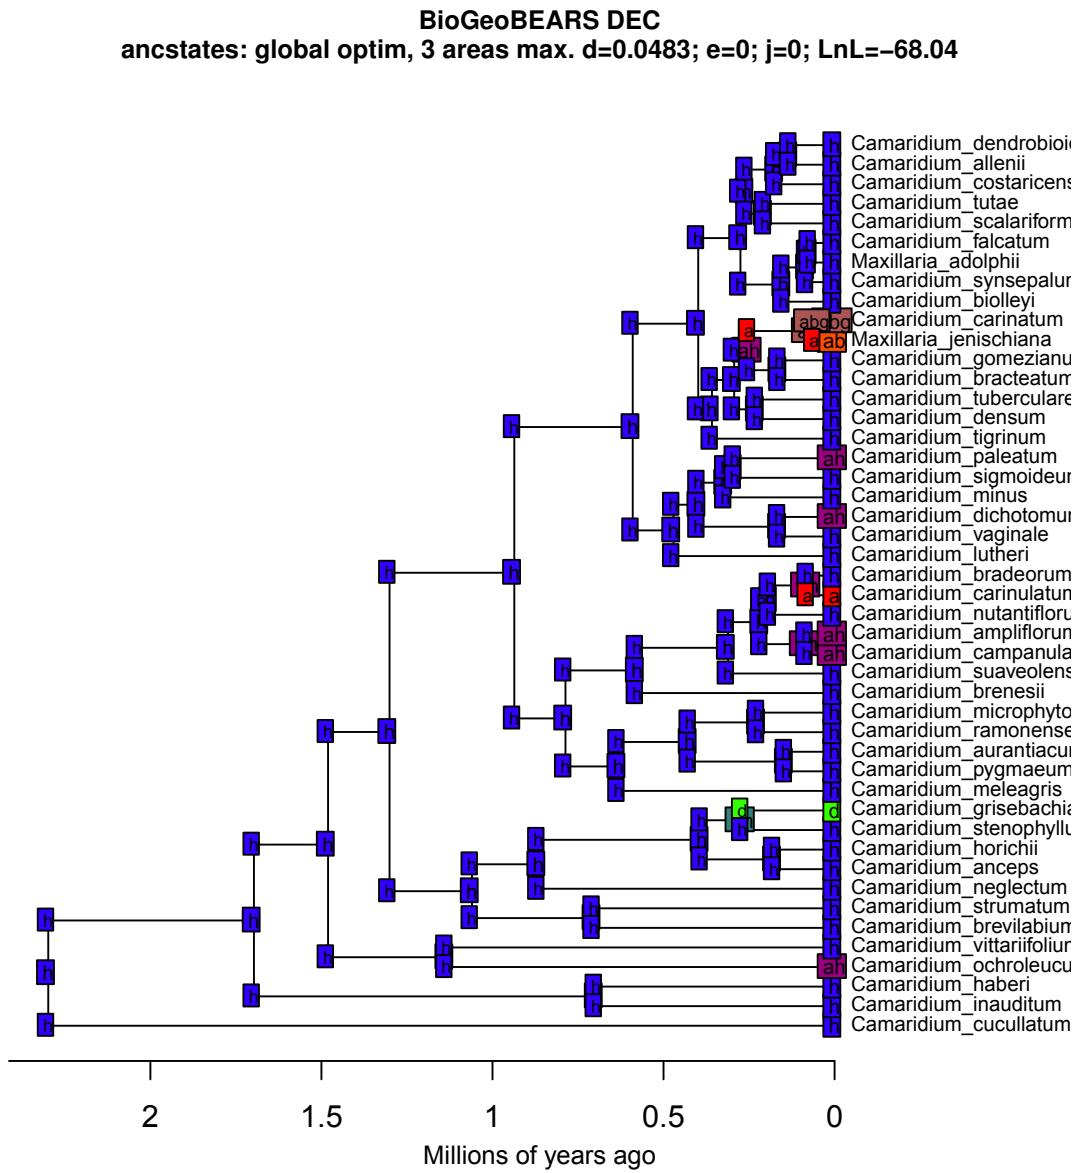

Figure S3: Clades of angiosperms

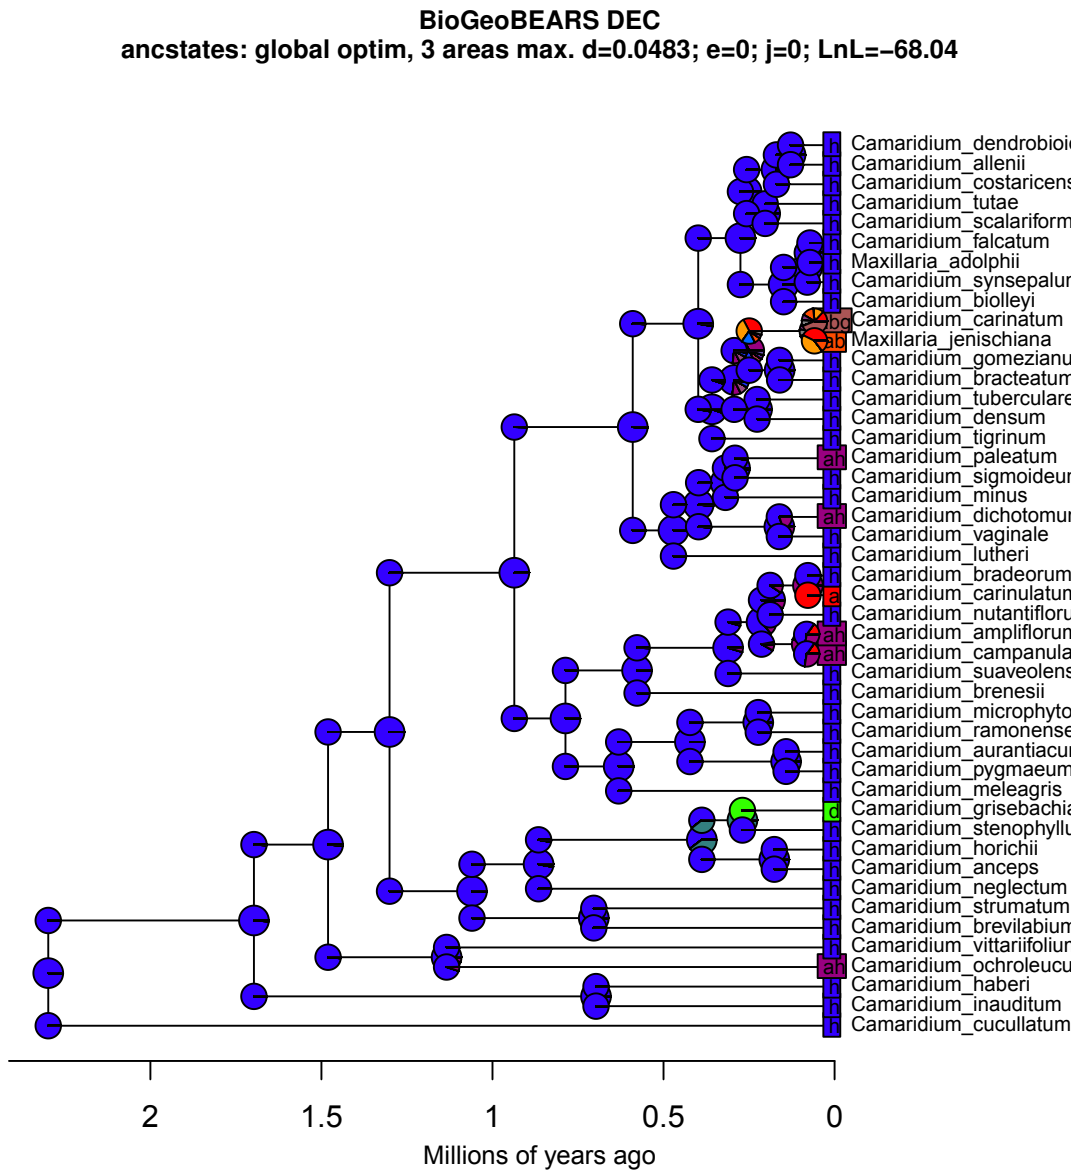

Figure S3: Clades of angiosperms

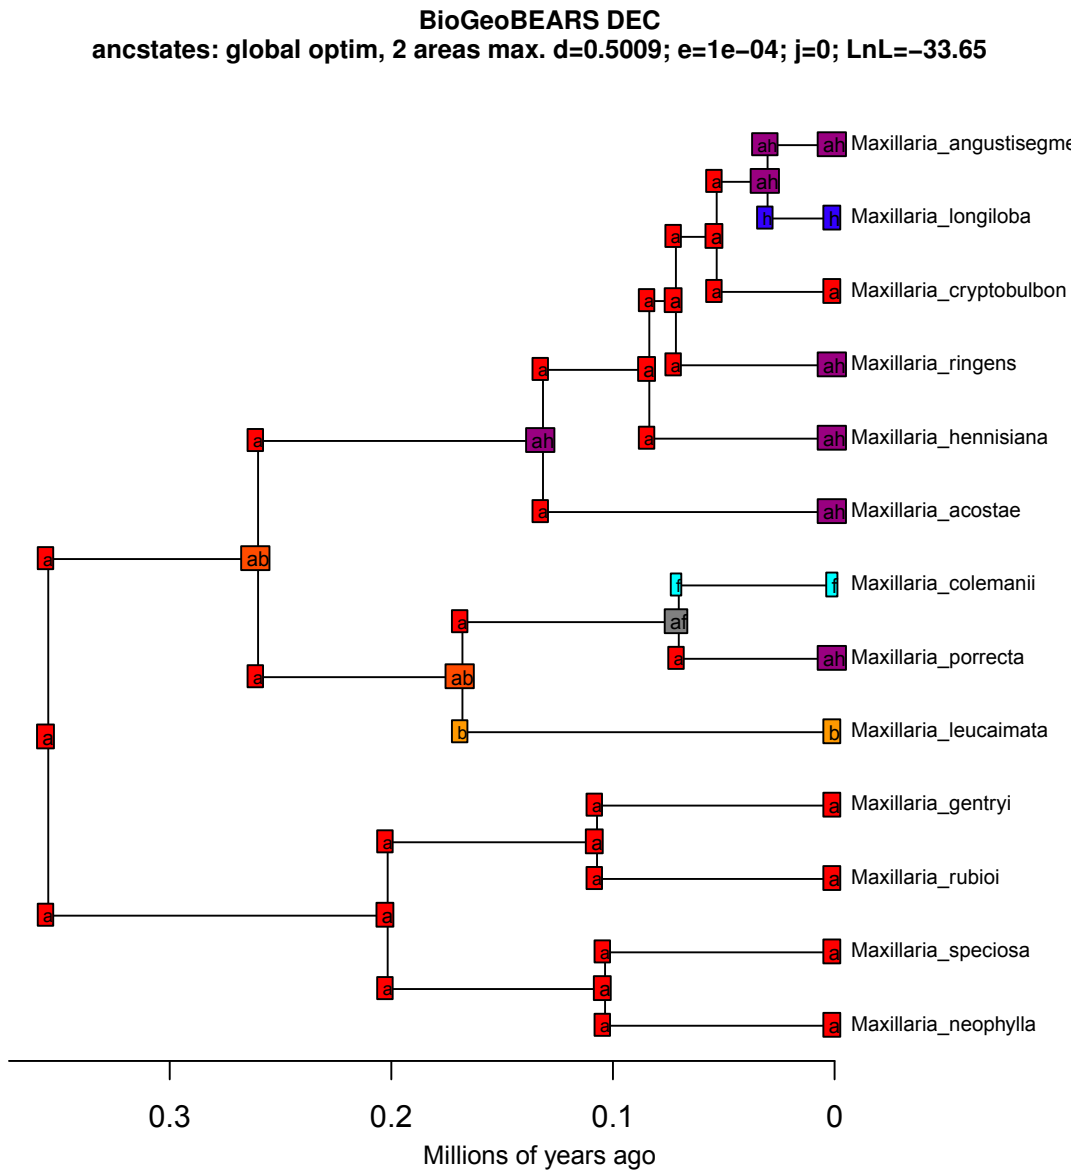

Figure S3: Clades of angiosperms

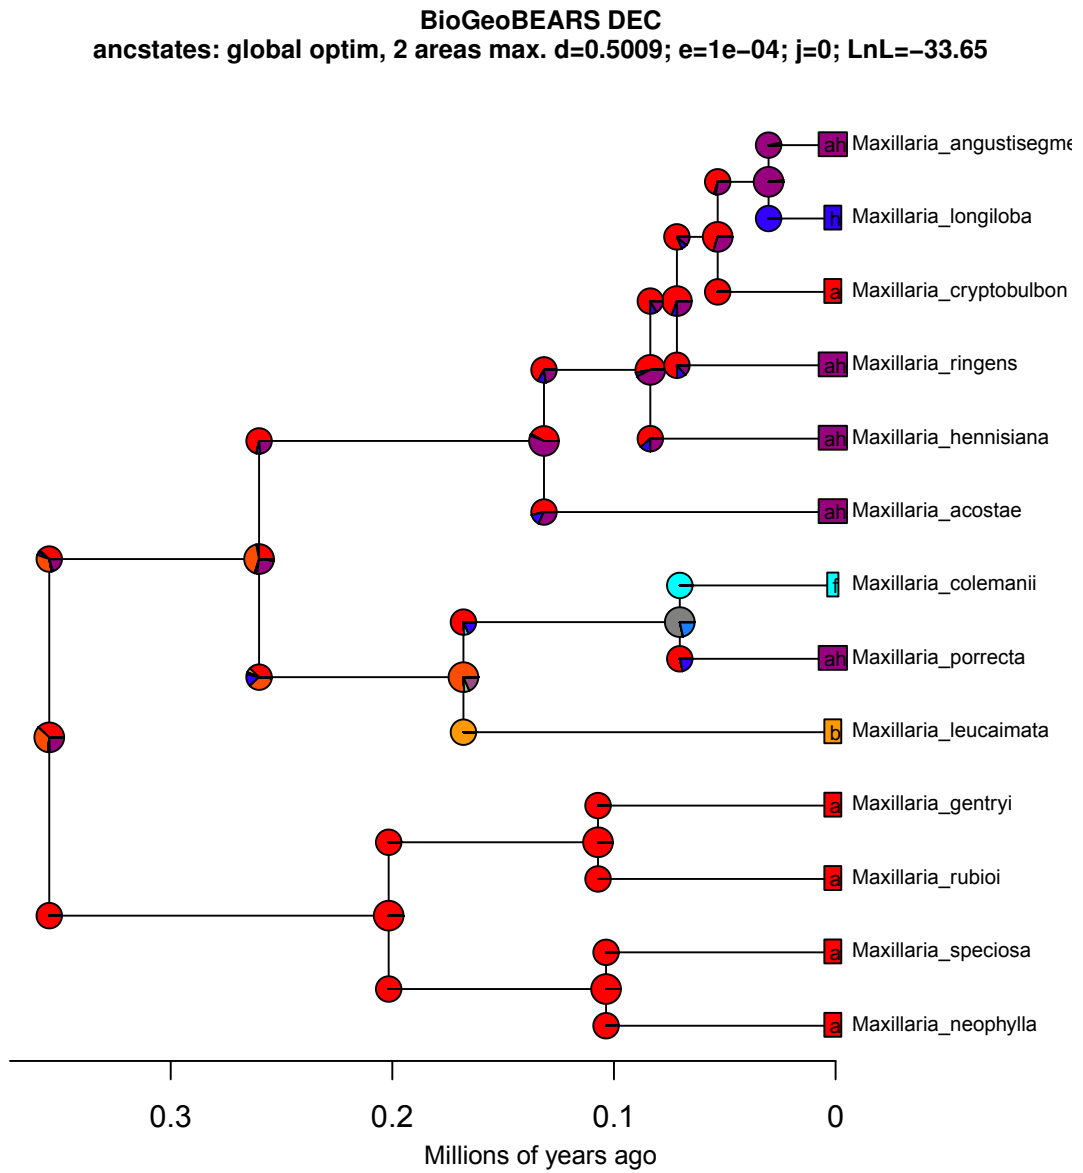

Figure S3: Clades of angiosperms

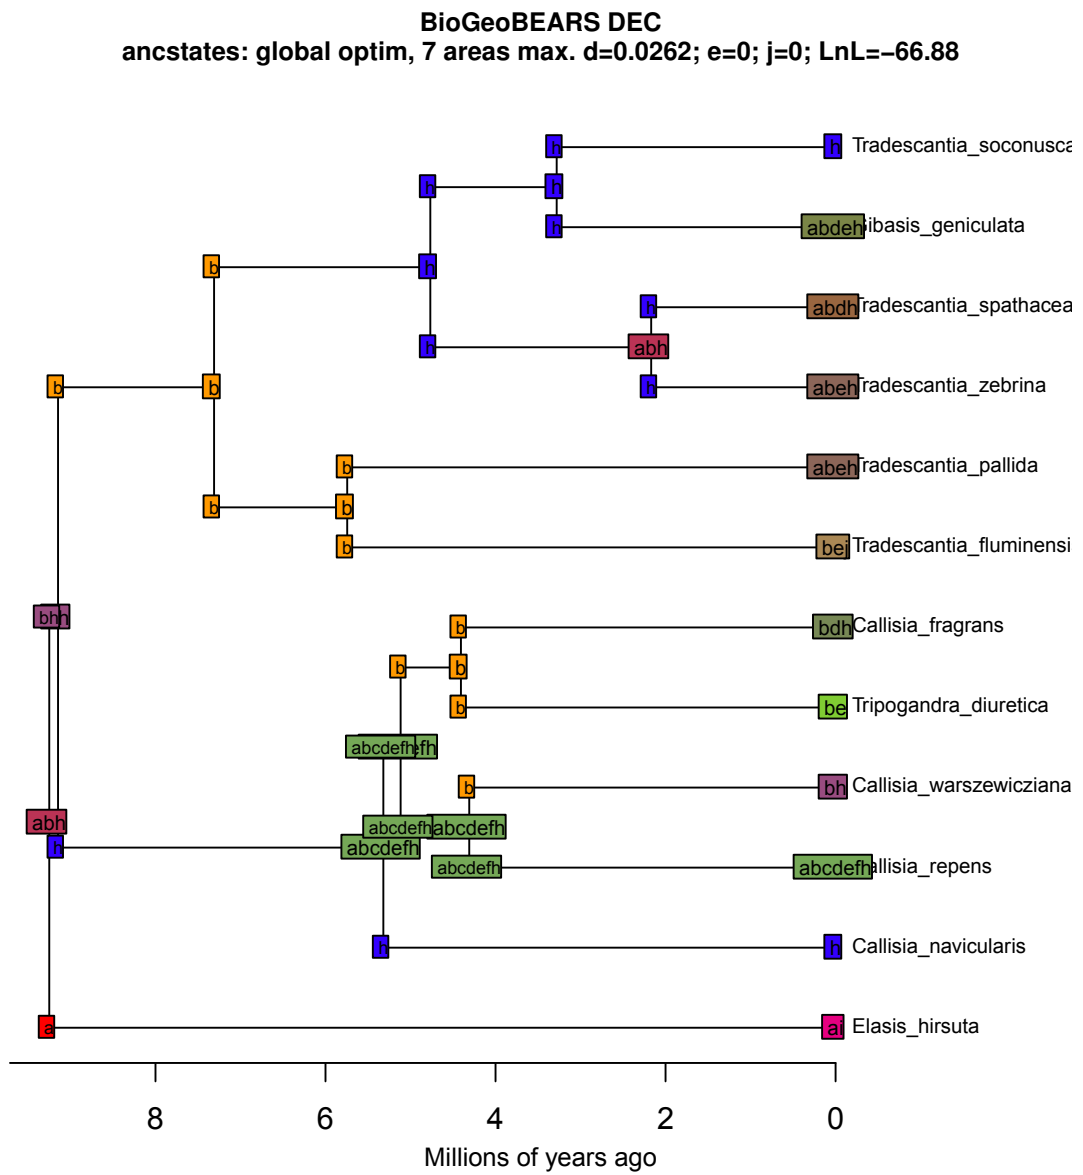

Figure S3: Clades of angiosperms

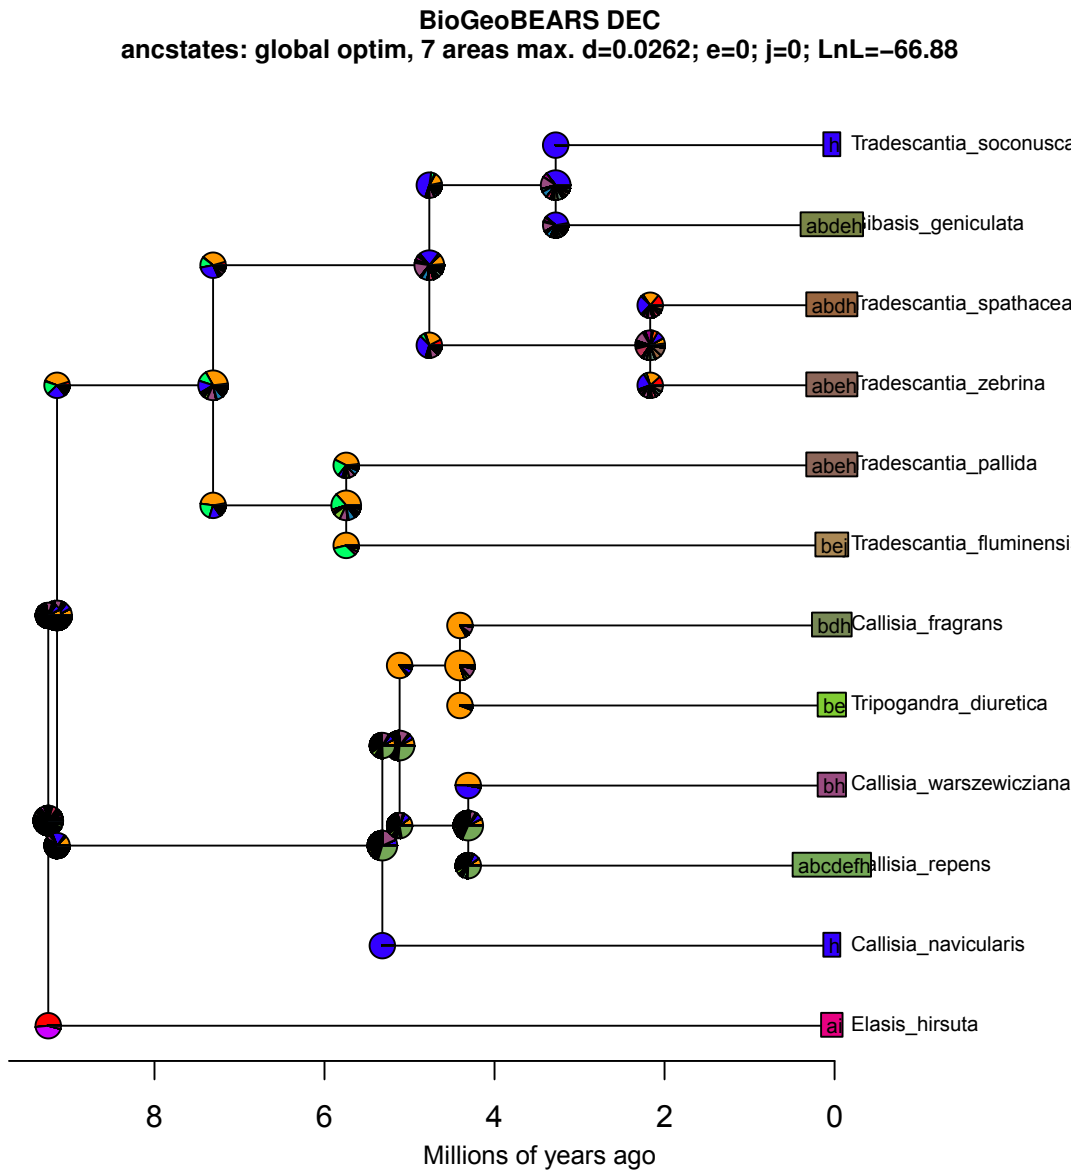

Figure S3: Clades of angiosperms

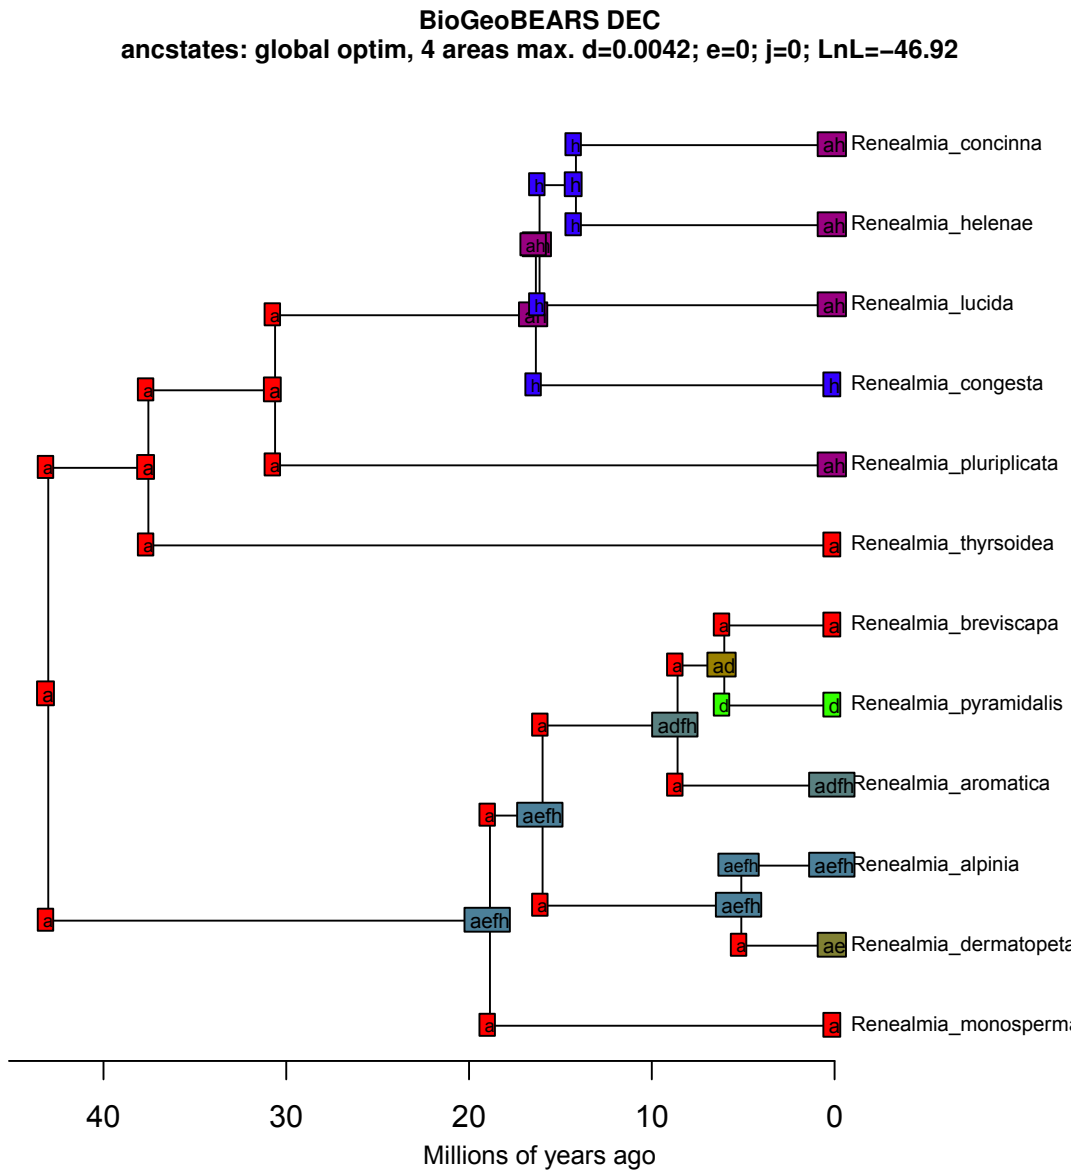



Figure S3: Clades of angiosperms

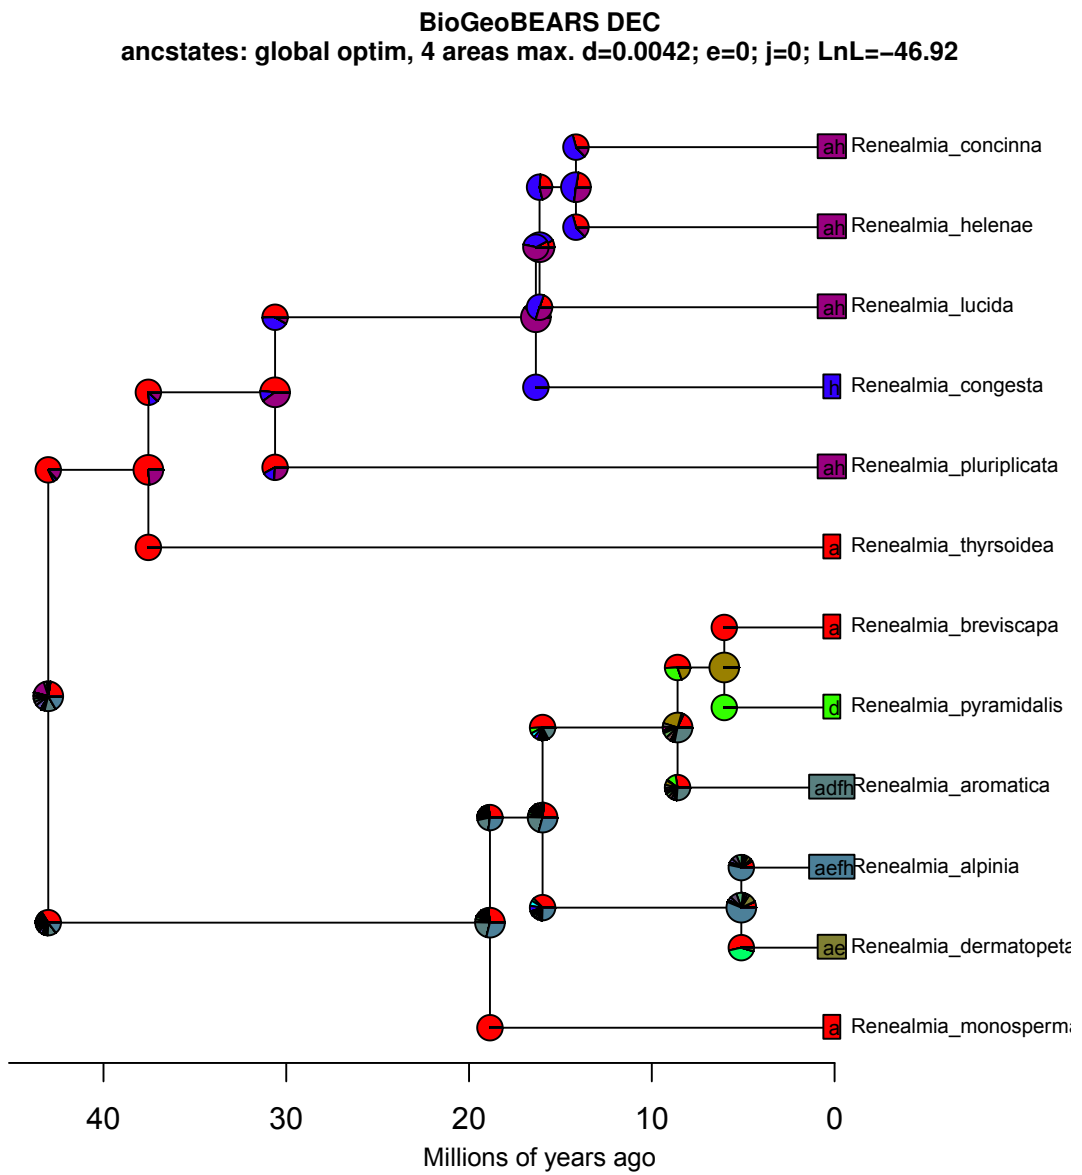

Figure S3: Clades of angiosperms

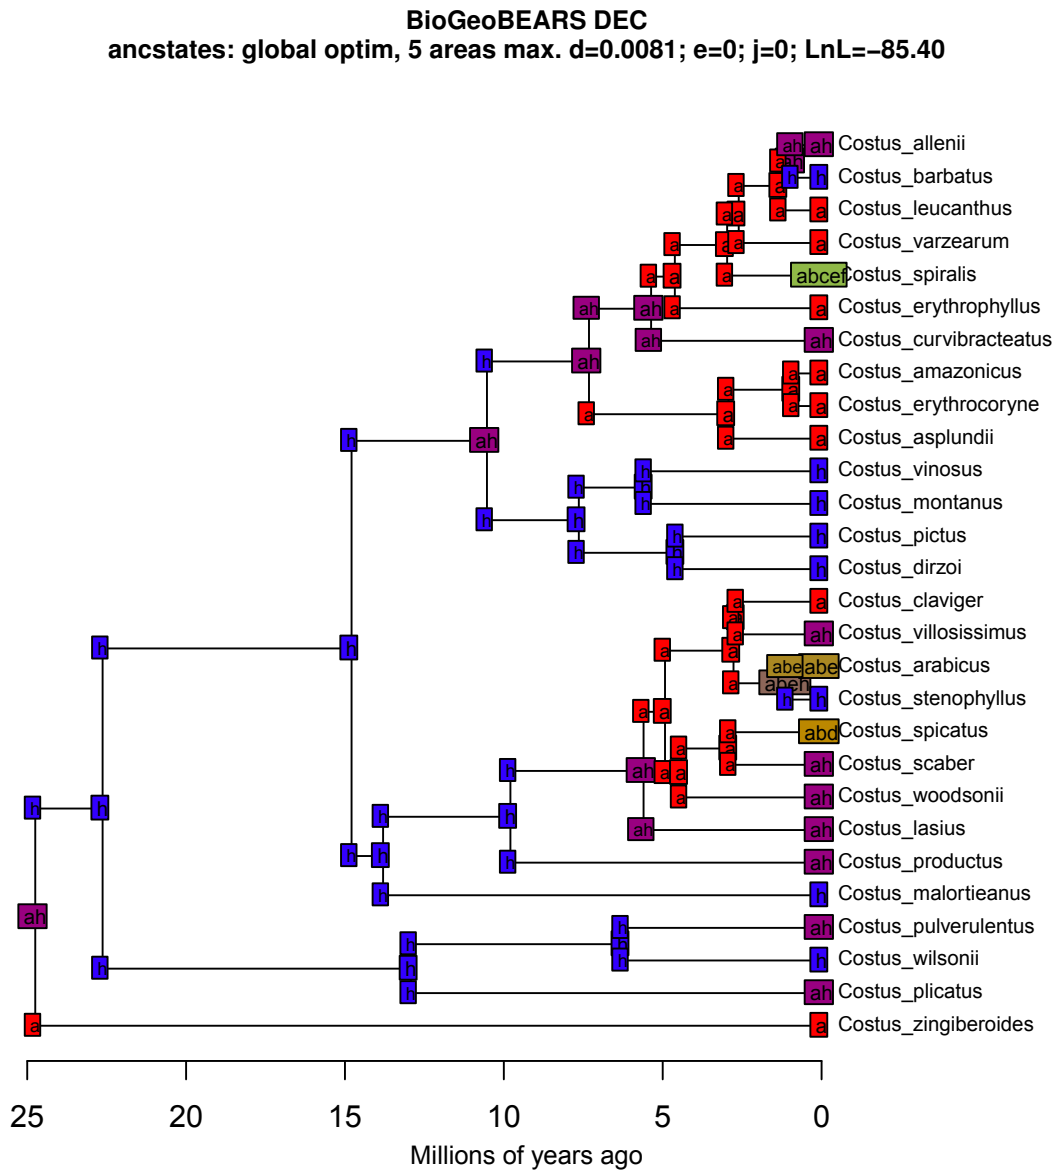

Figure S3: Clades of angiosperms

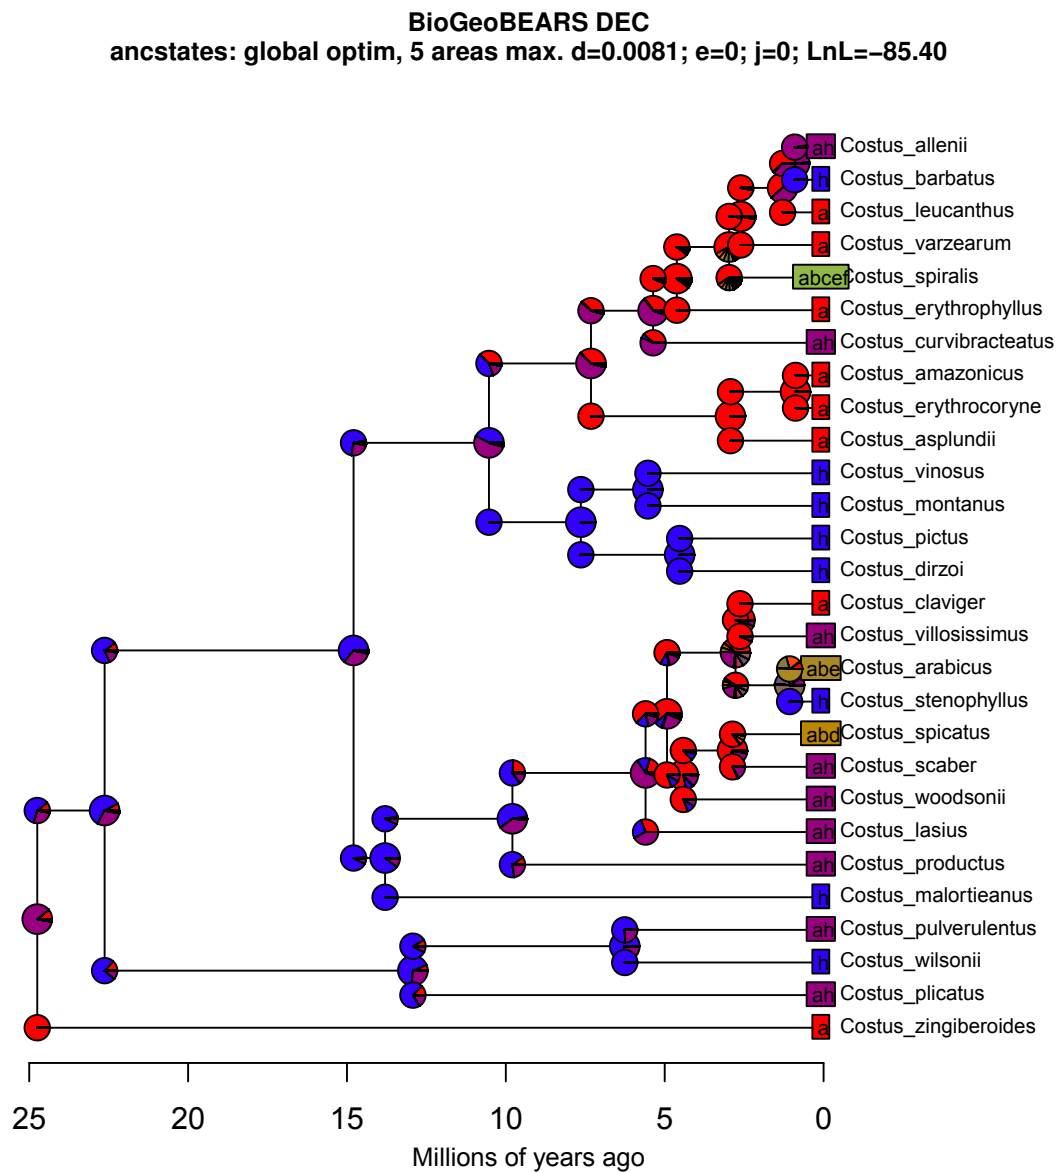

Figure S3: Clades of angiosperms

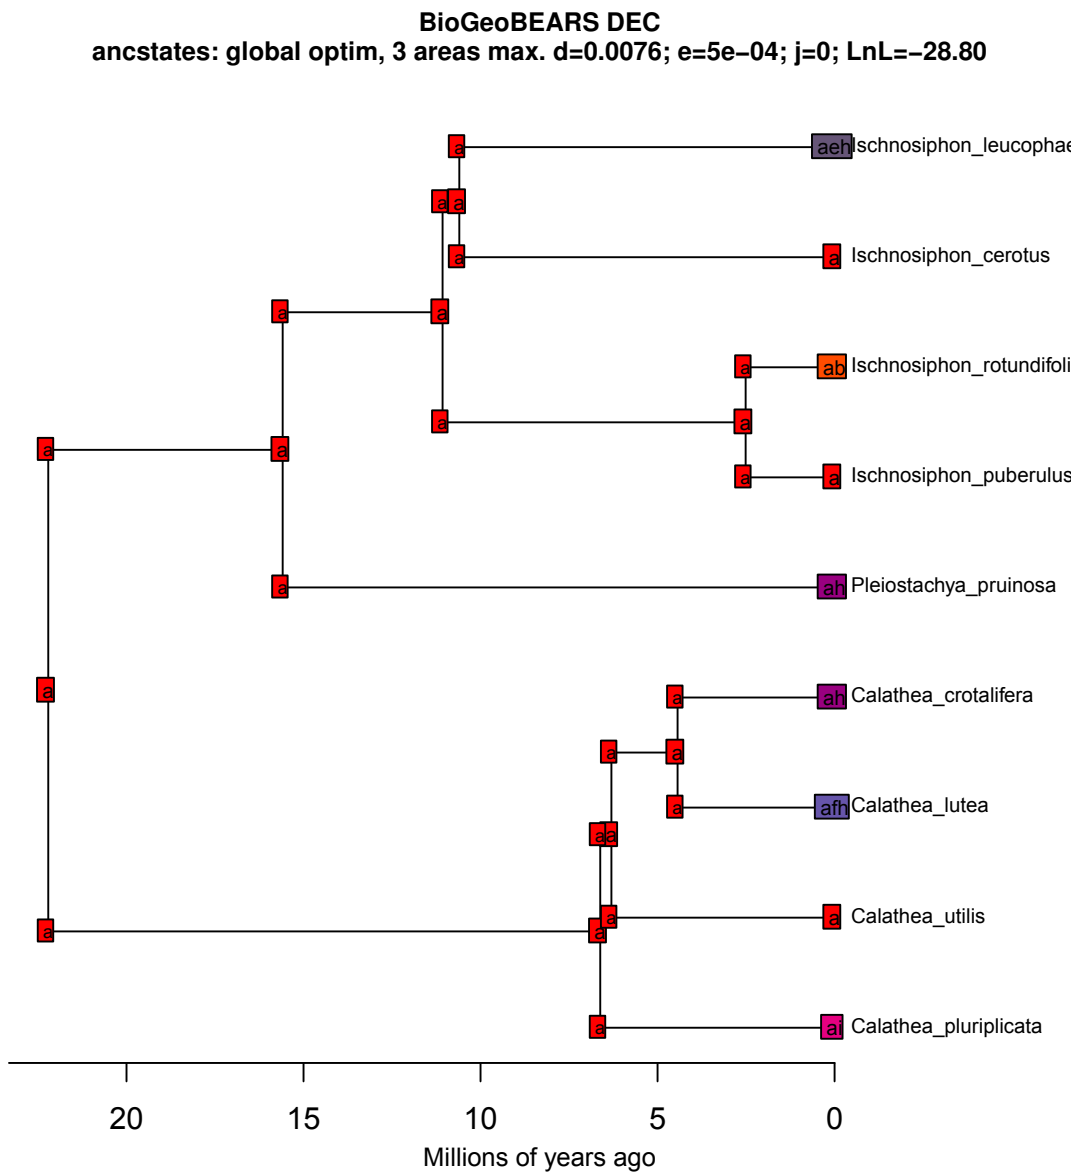

Figure S3: Clades of angiosperms

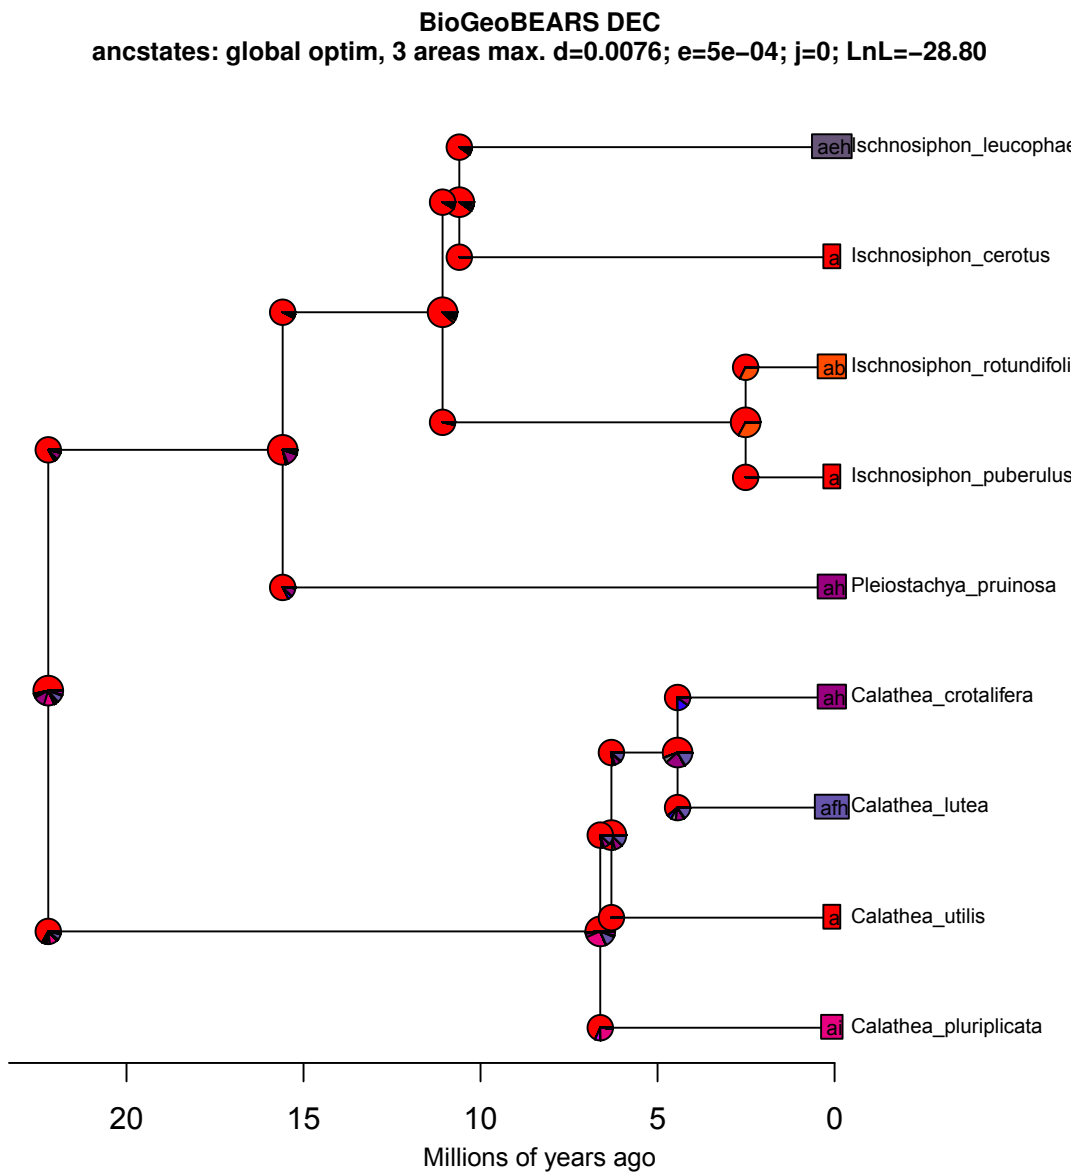

Figure S3: Clades of angiosperms

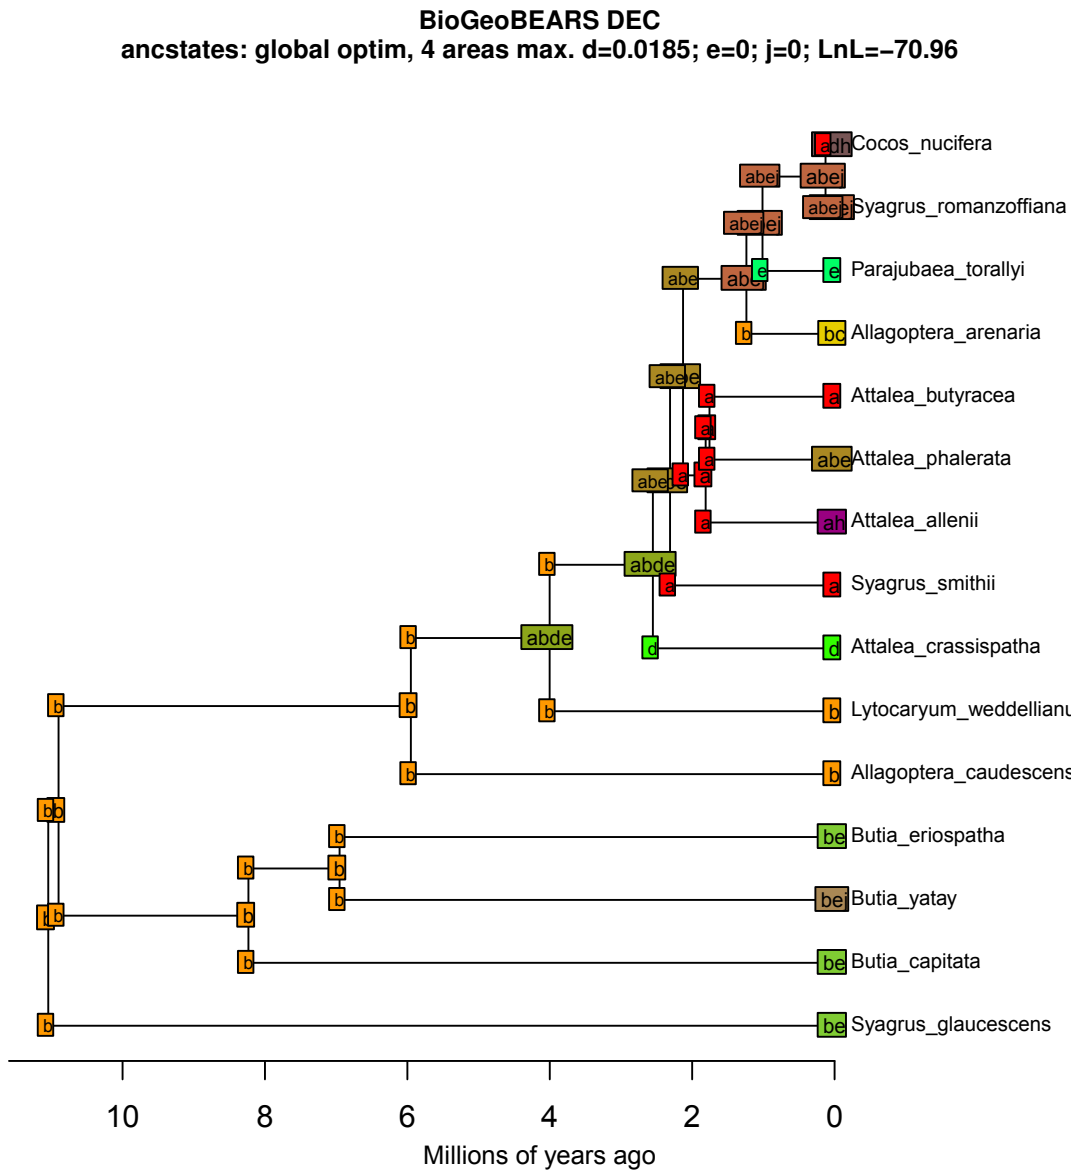

Figure S3: Clades of angiosperms

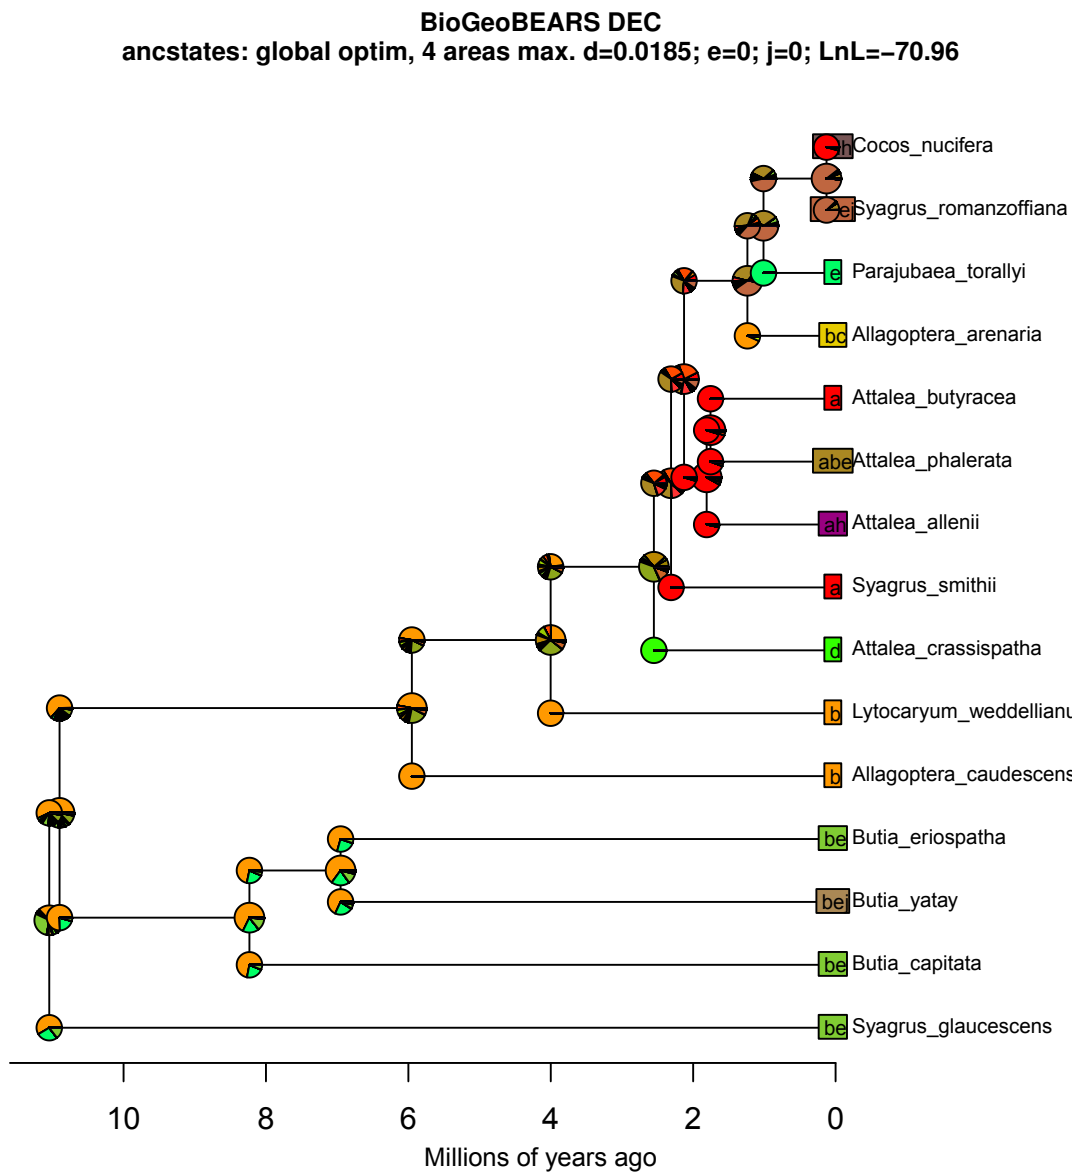

Figure S3: Clades of angiosperms

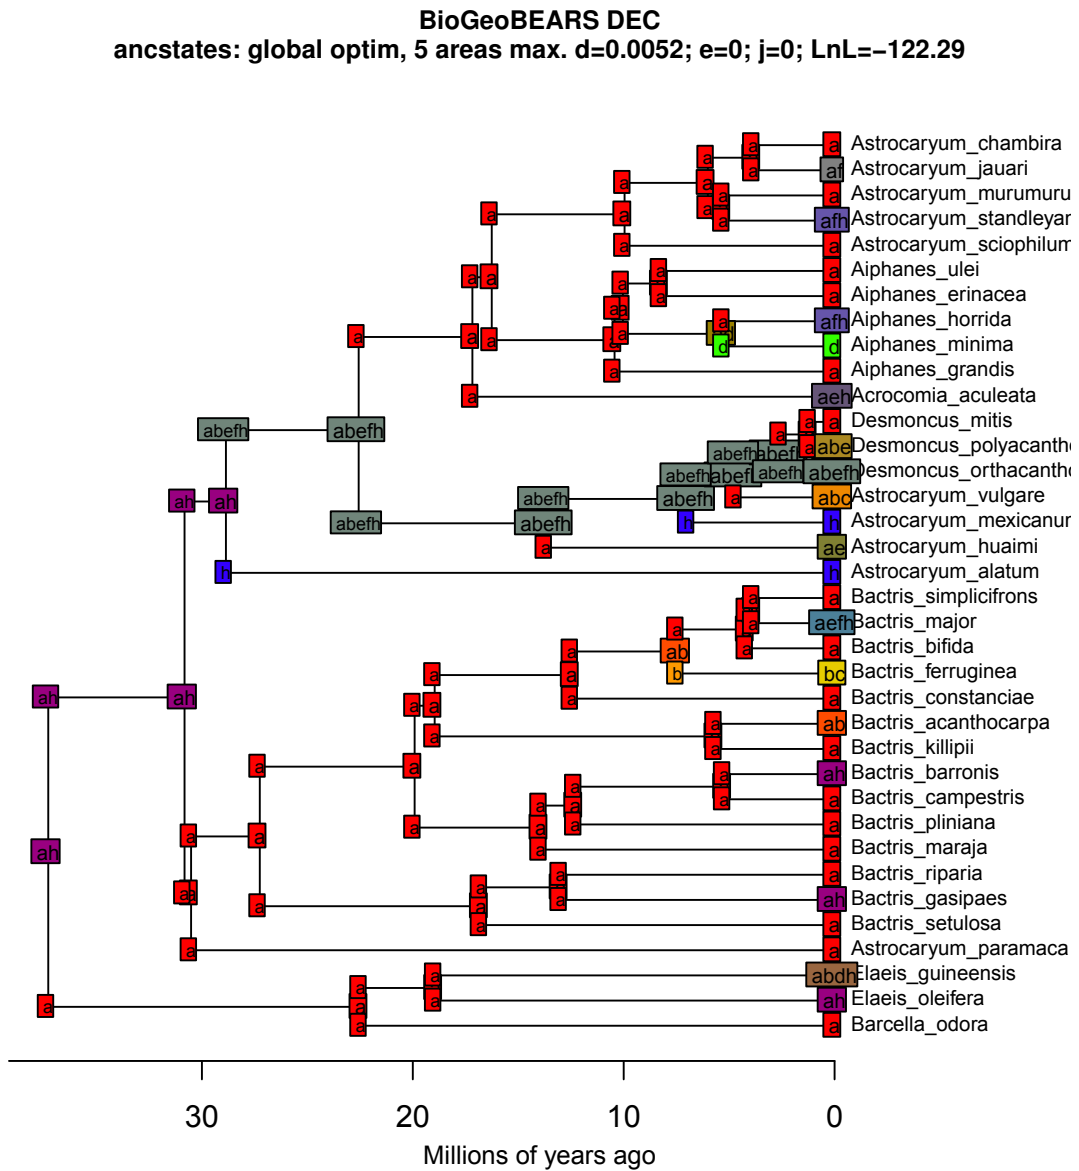



Figure S3: Clades of angiosperms

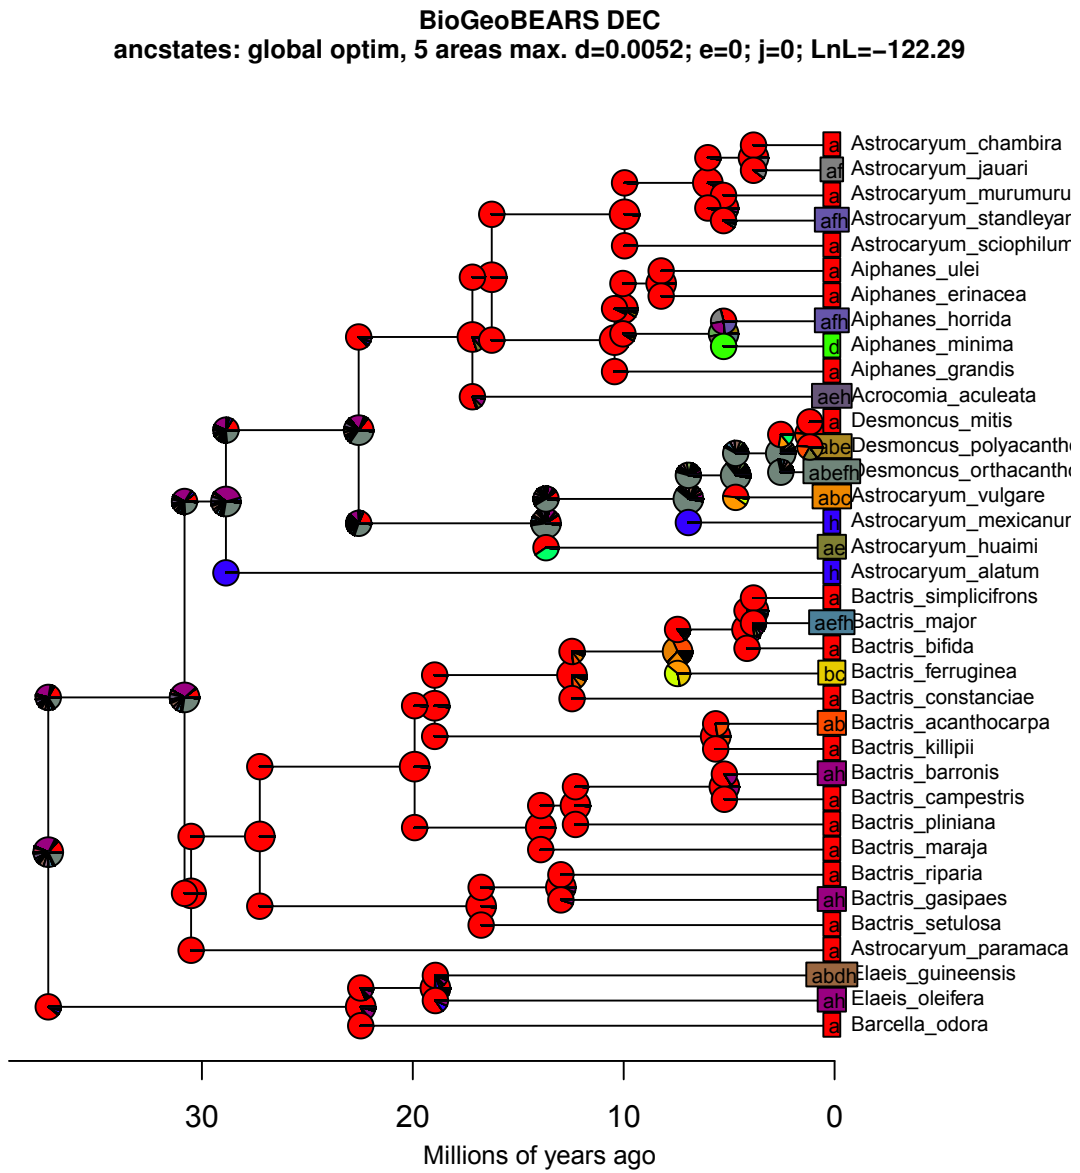

Figure S3: Clades of angiosperms

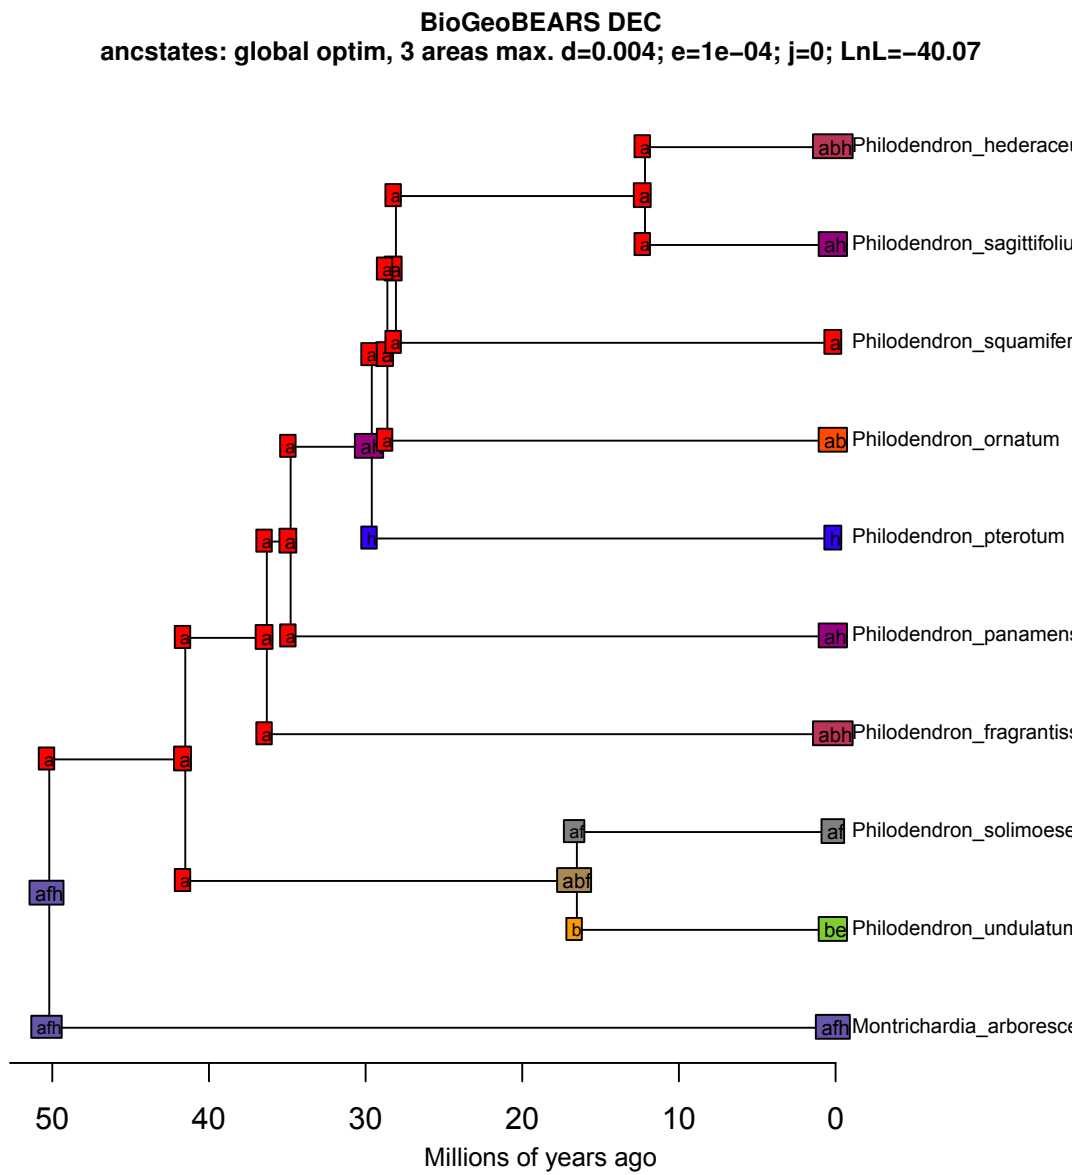

Figure S3: Clades of angiosperms

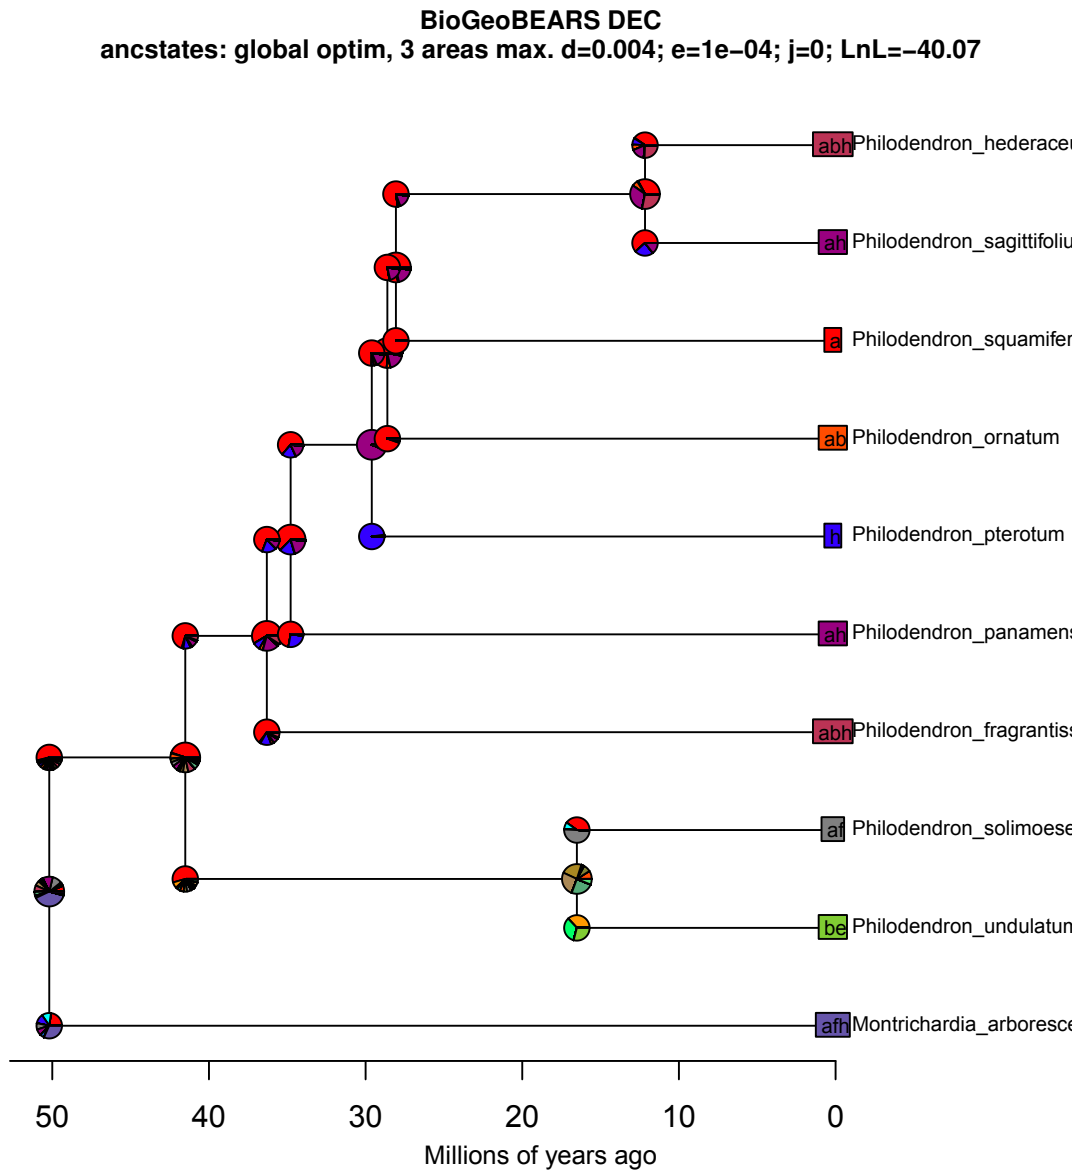

Figure S3: Clades of angiosperms

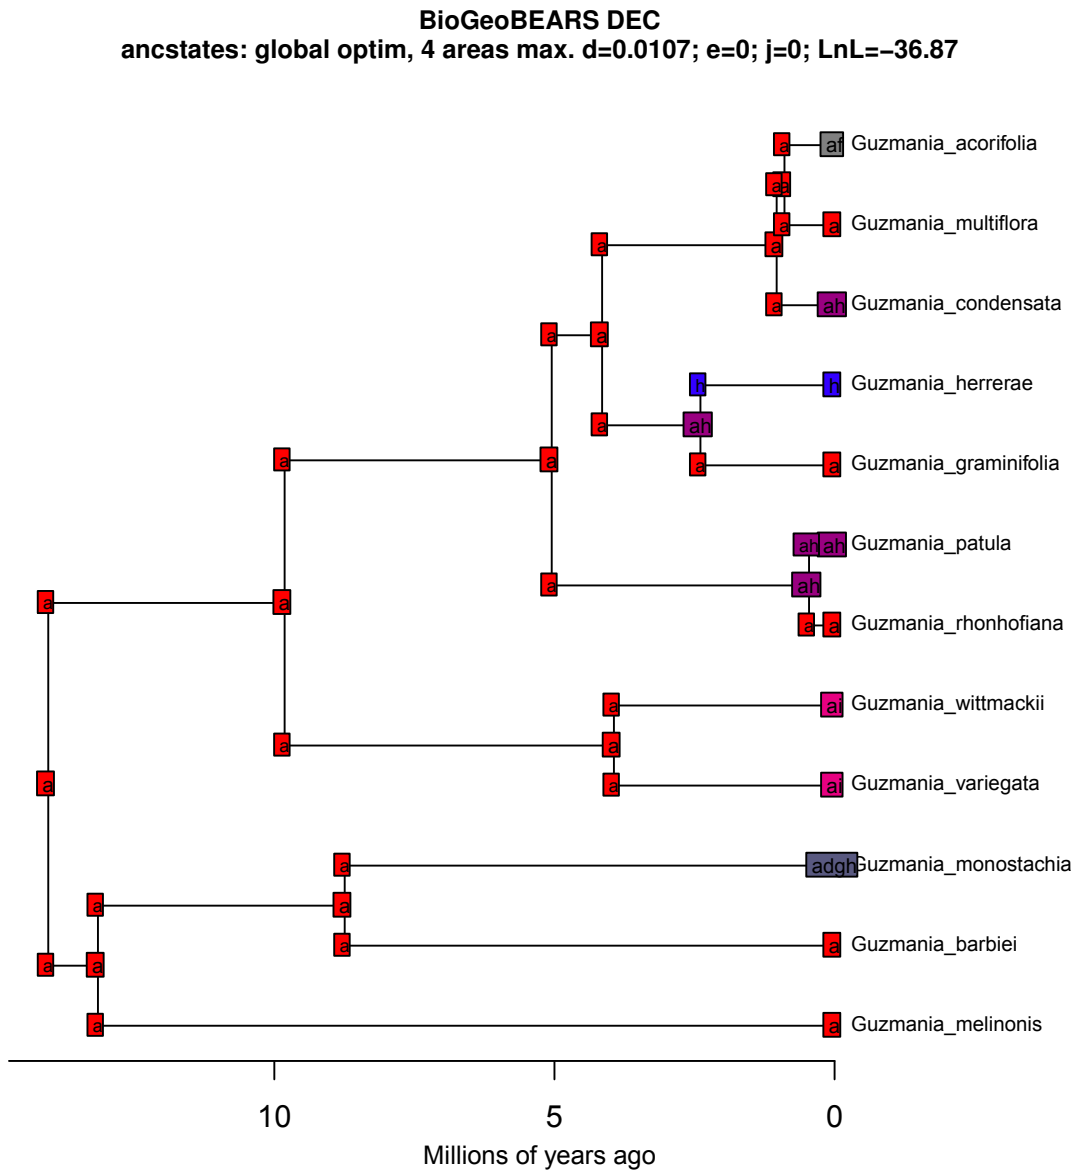

Figure S3: Clades of angiosperms

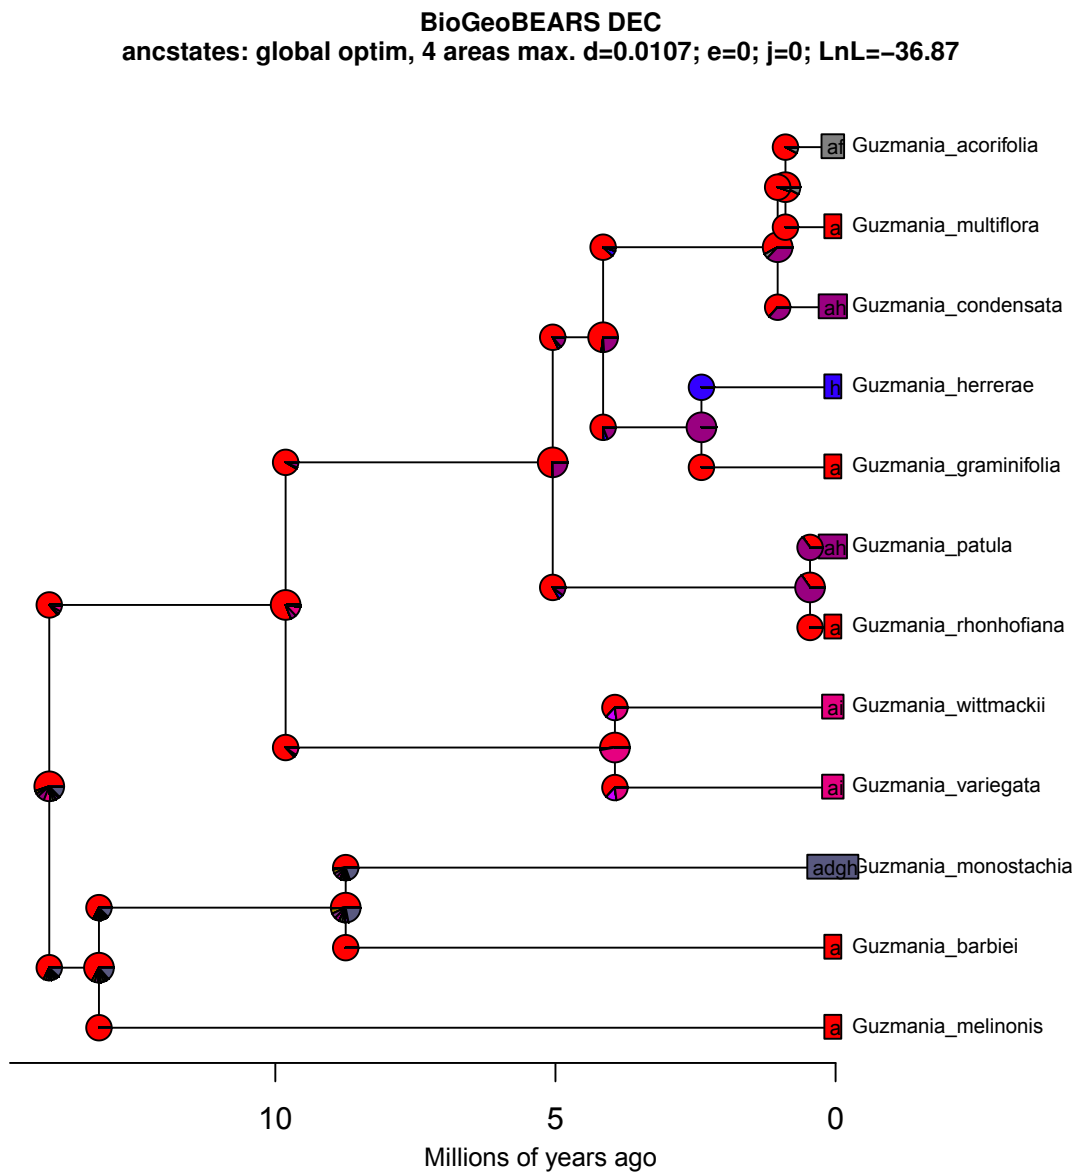

Figure S3: Clades of angiosperms

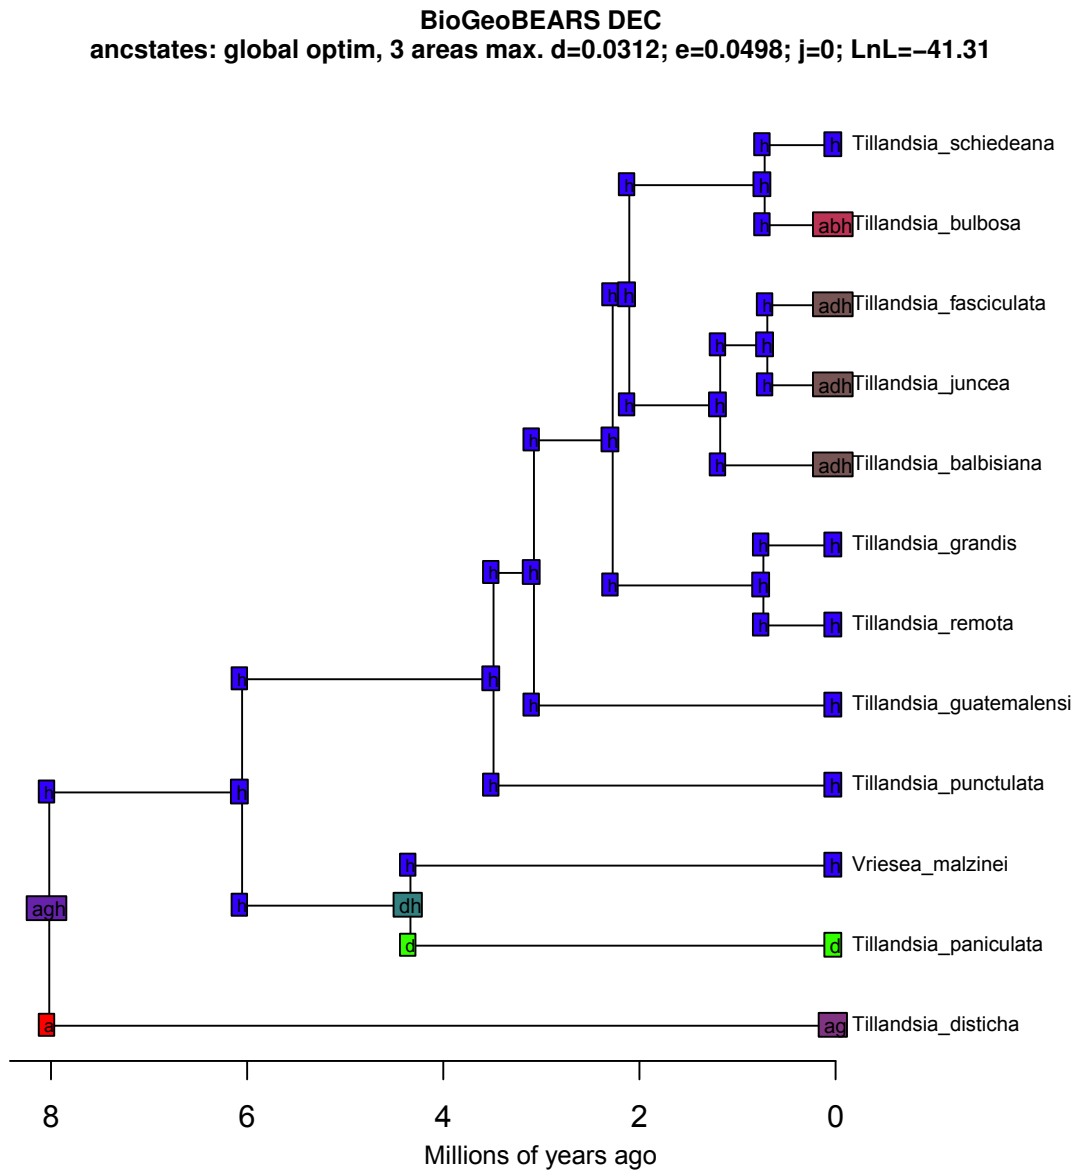

Figure S3: Clades of angiosperms

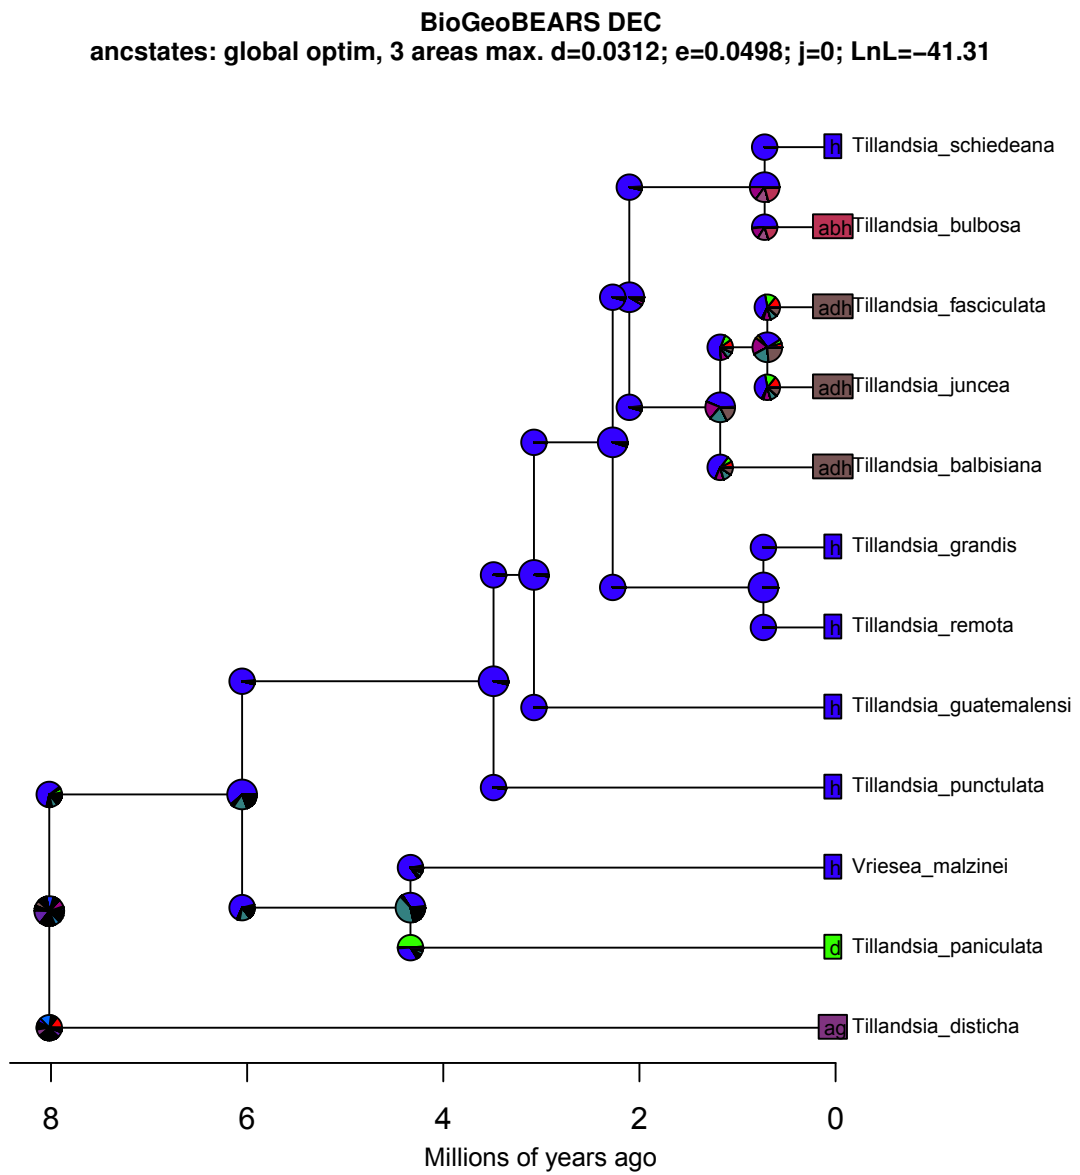

Figure S3: Clades of angiosperms

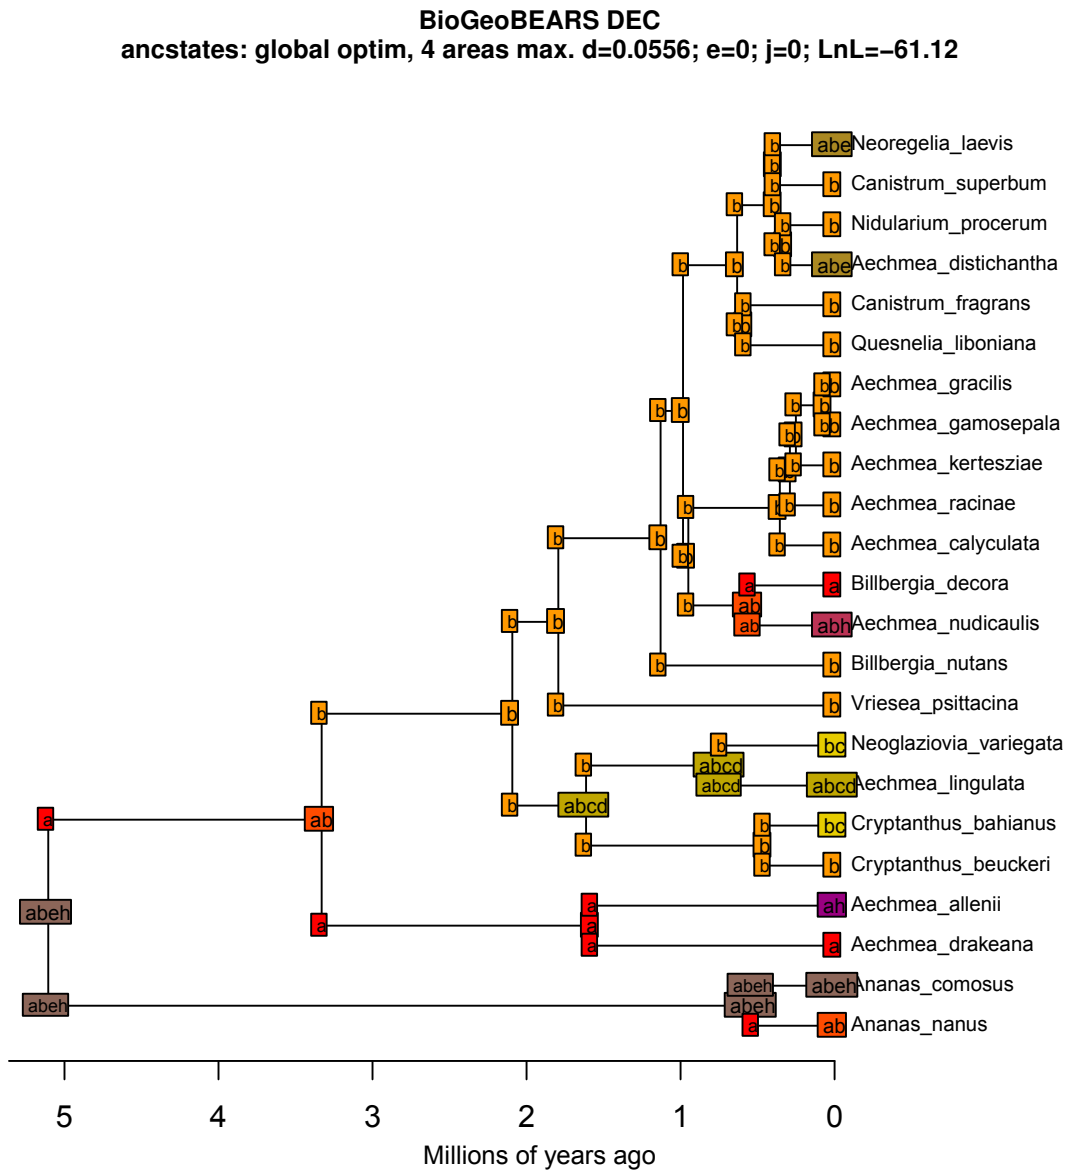



Figure S3: Clades of angiosperms

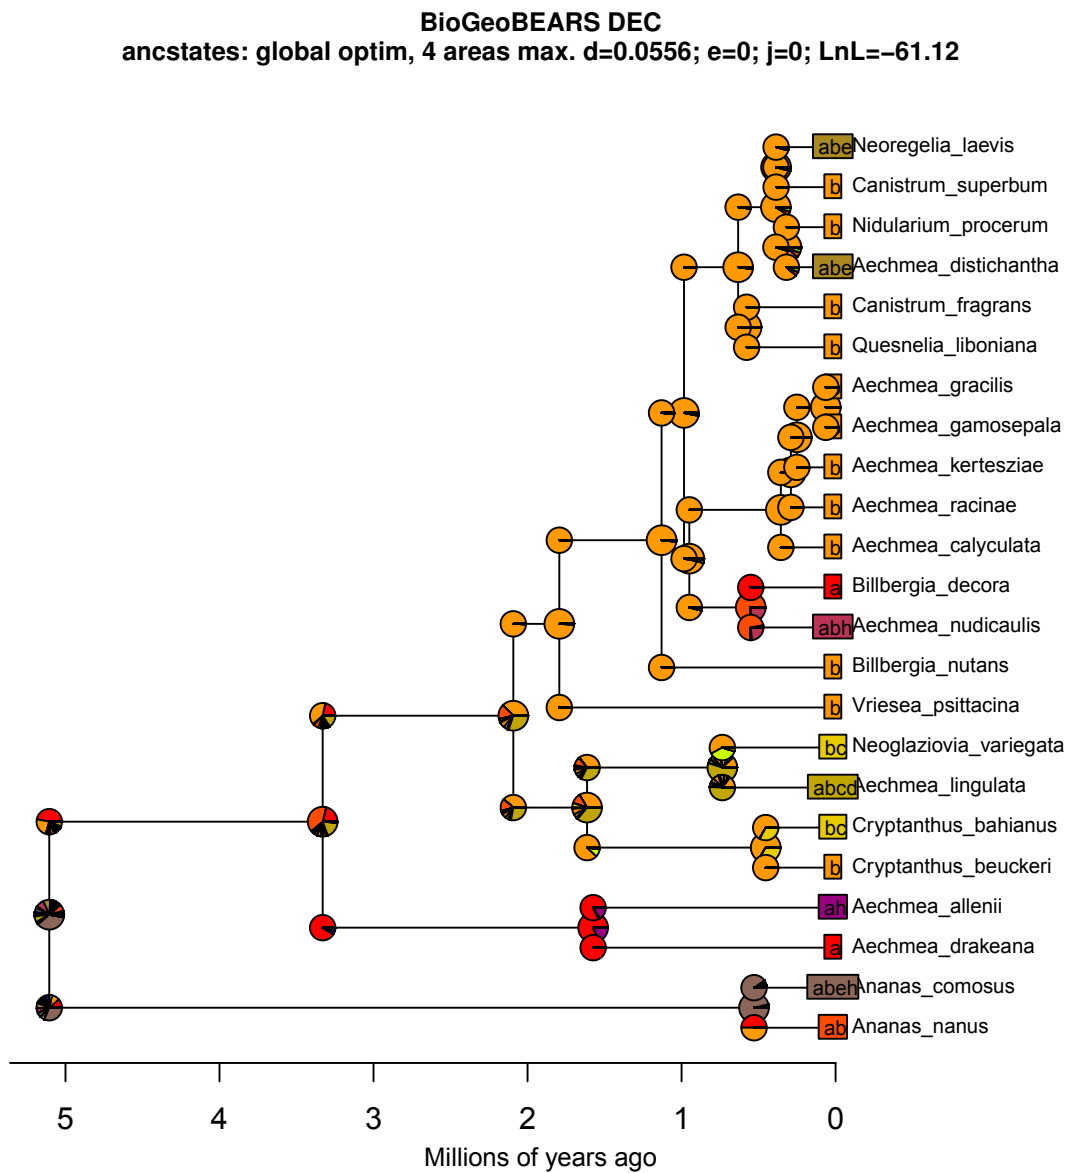

Figure S3: Clades of angiosperms

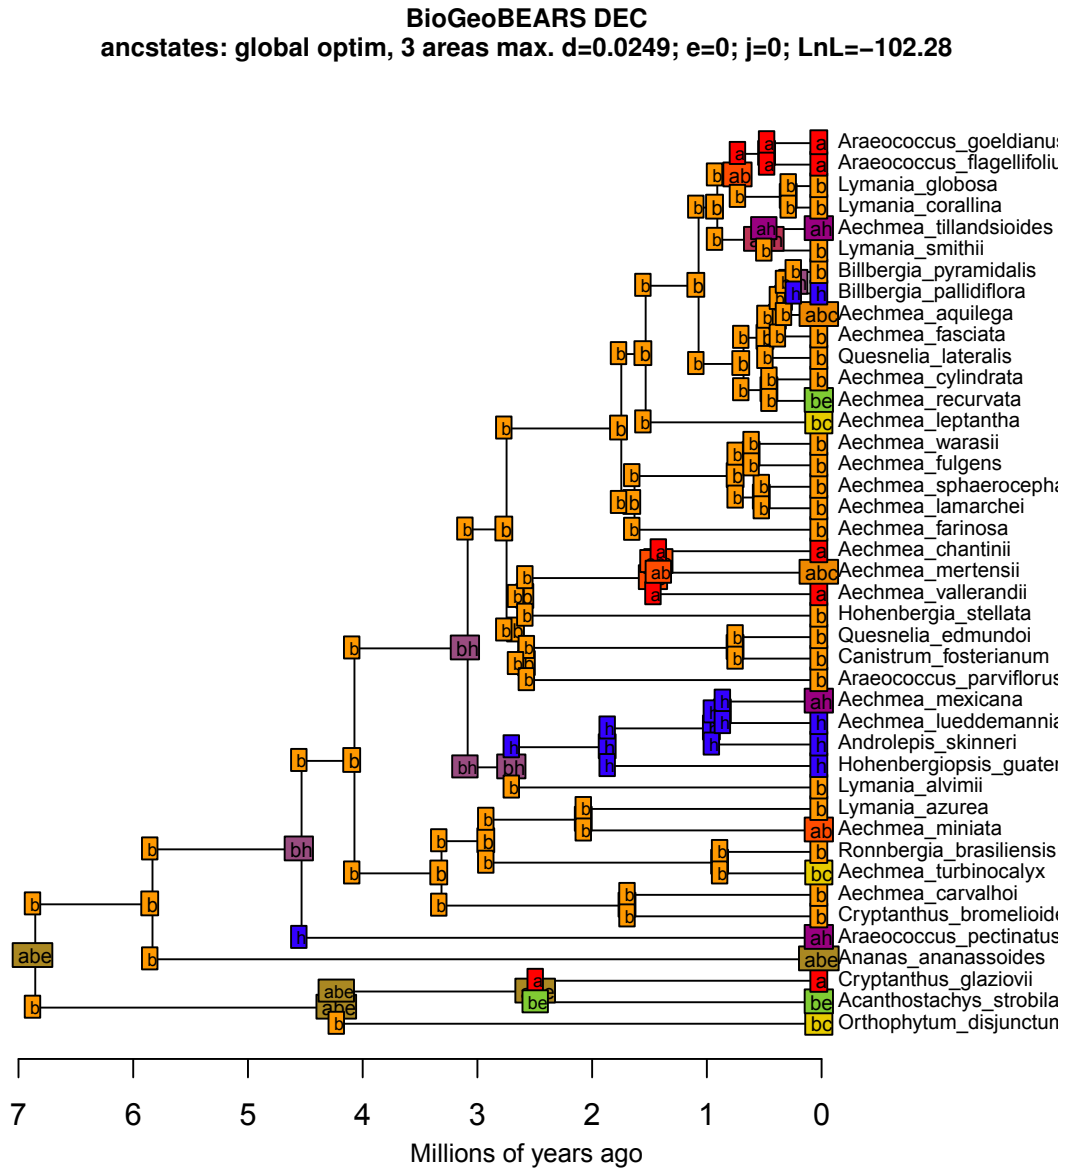

Figure S3: Clades of angiosperms

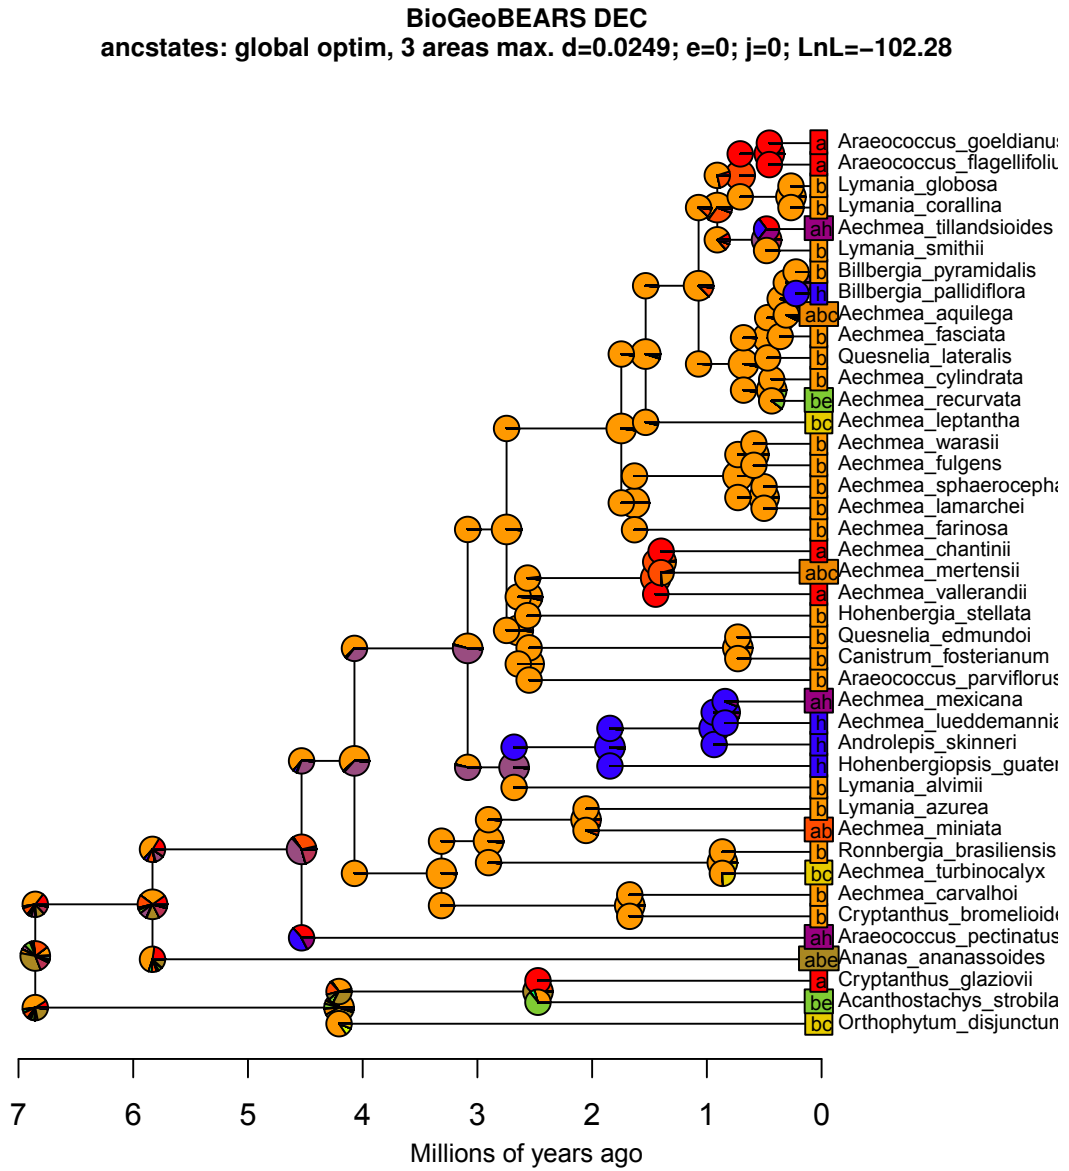

Figure S3: Clades of angiosperms

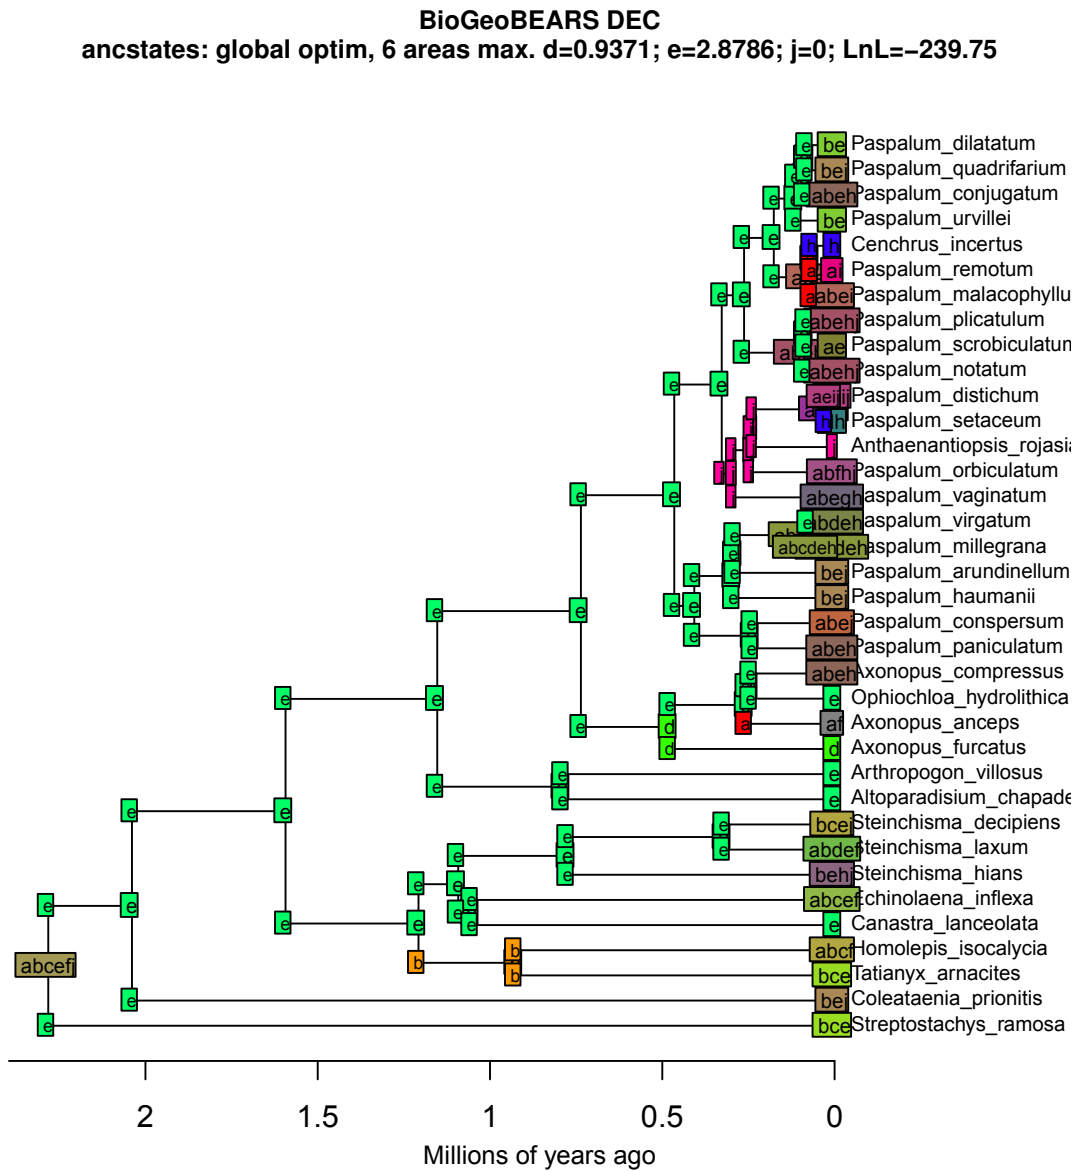

Figure S3: Clades of angiosperms

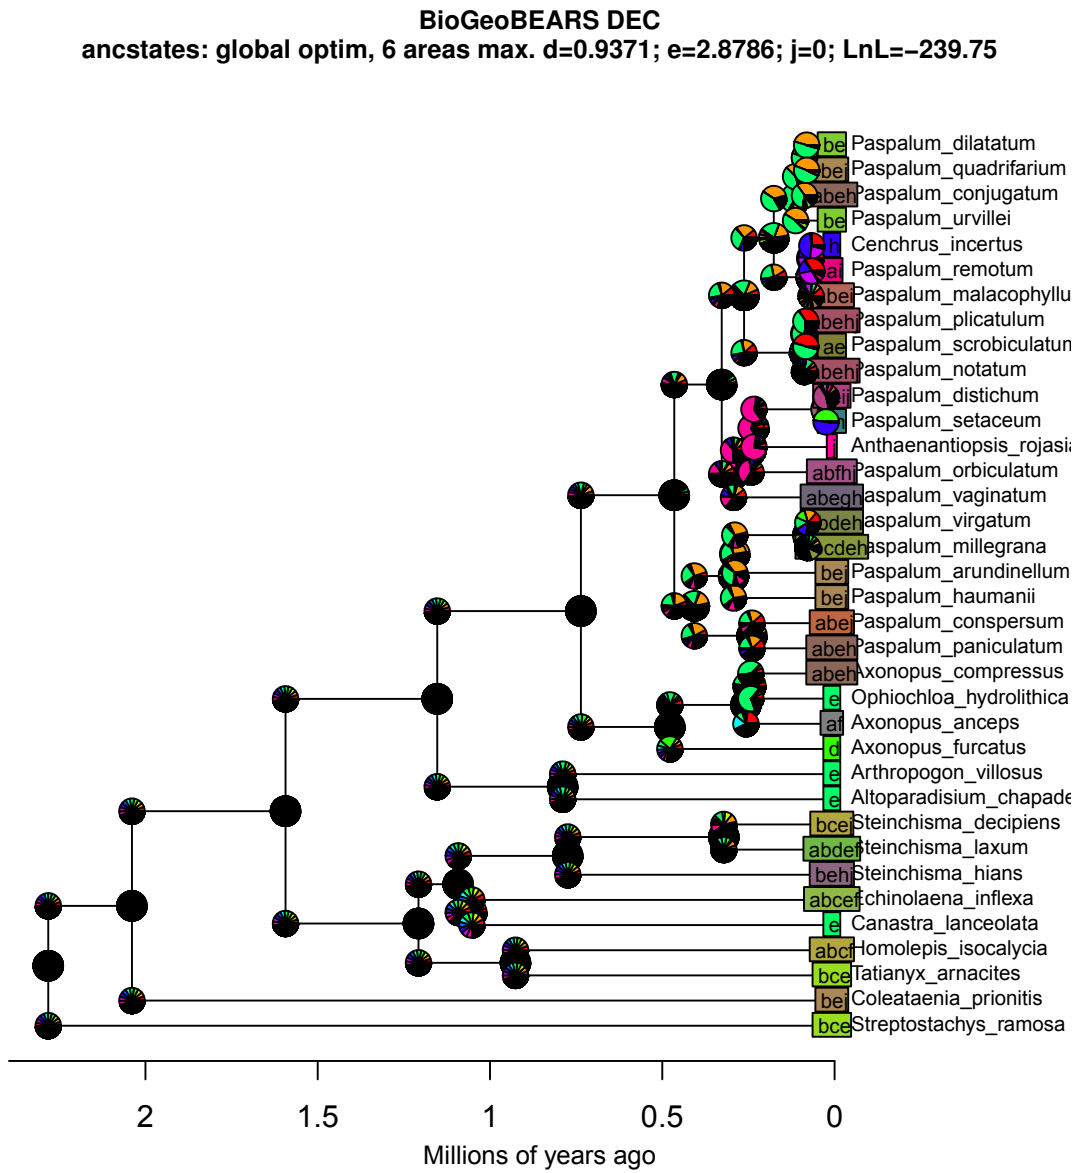

Figure S3: Clades of angiosperms

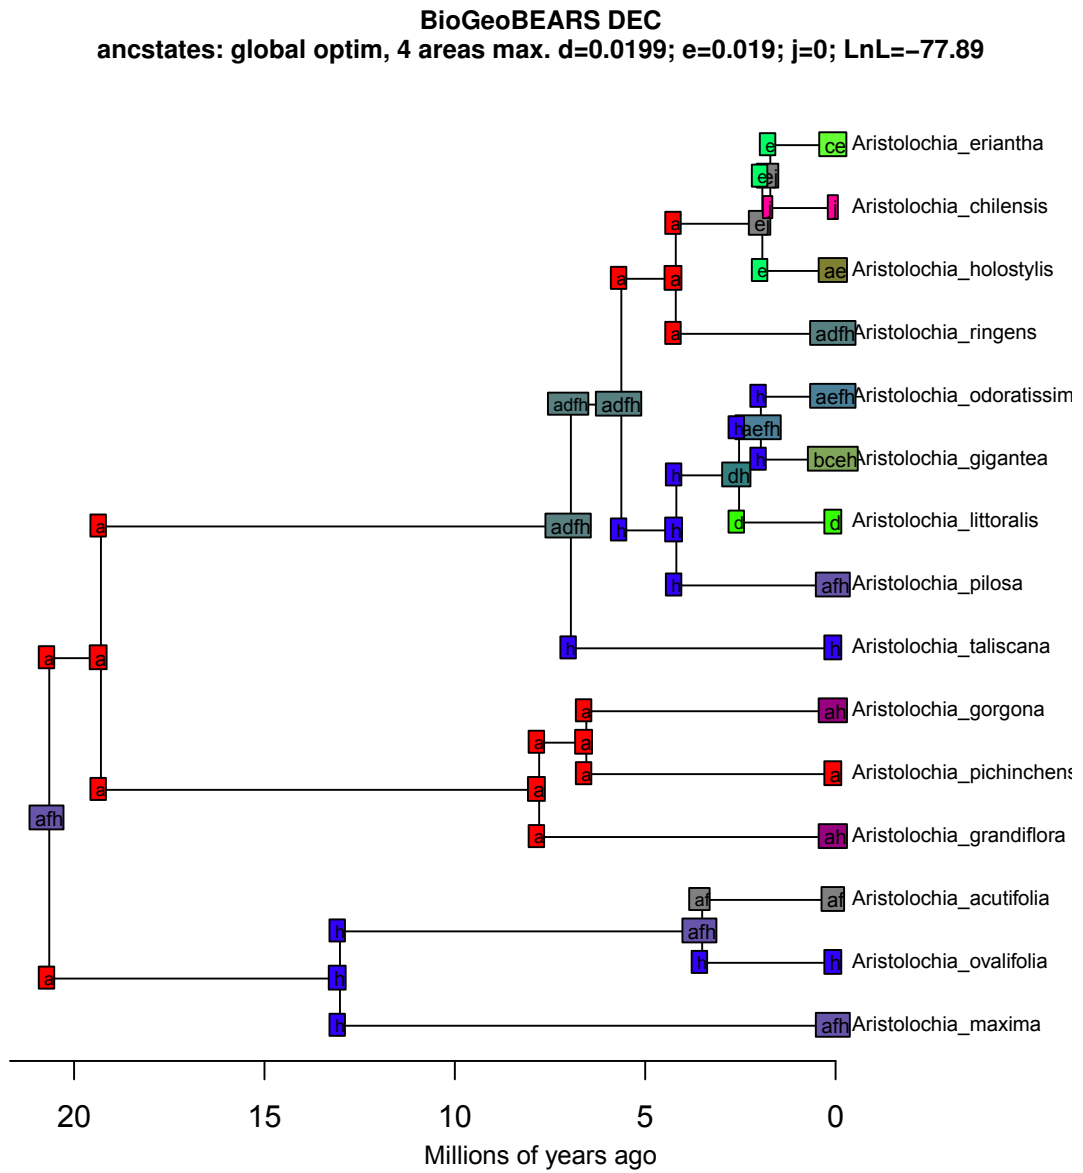

Figure S3: Clades of angiosperms

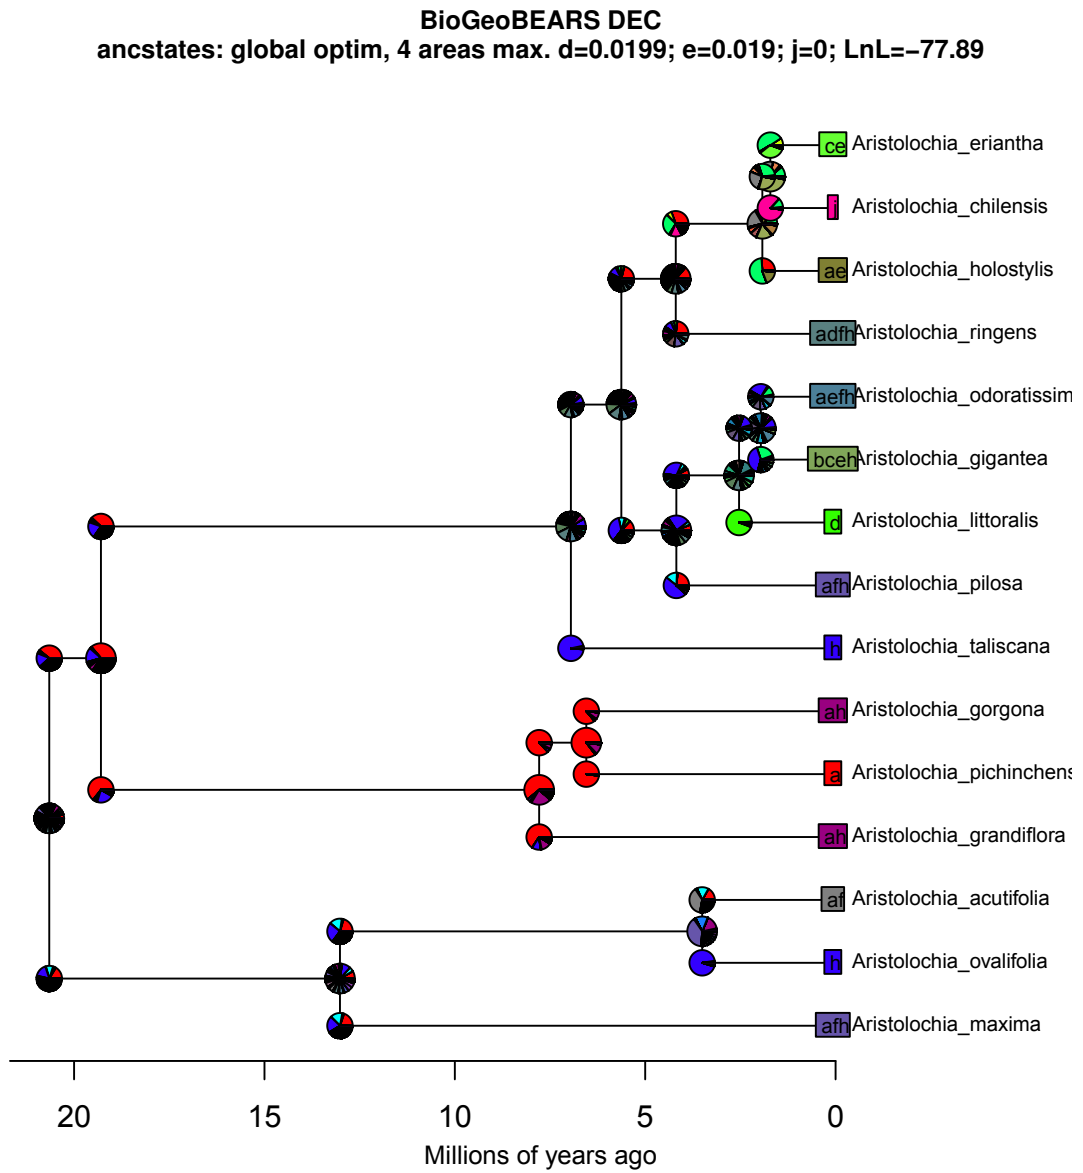

Figure S3: Clades of angiosperms

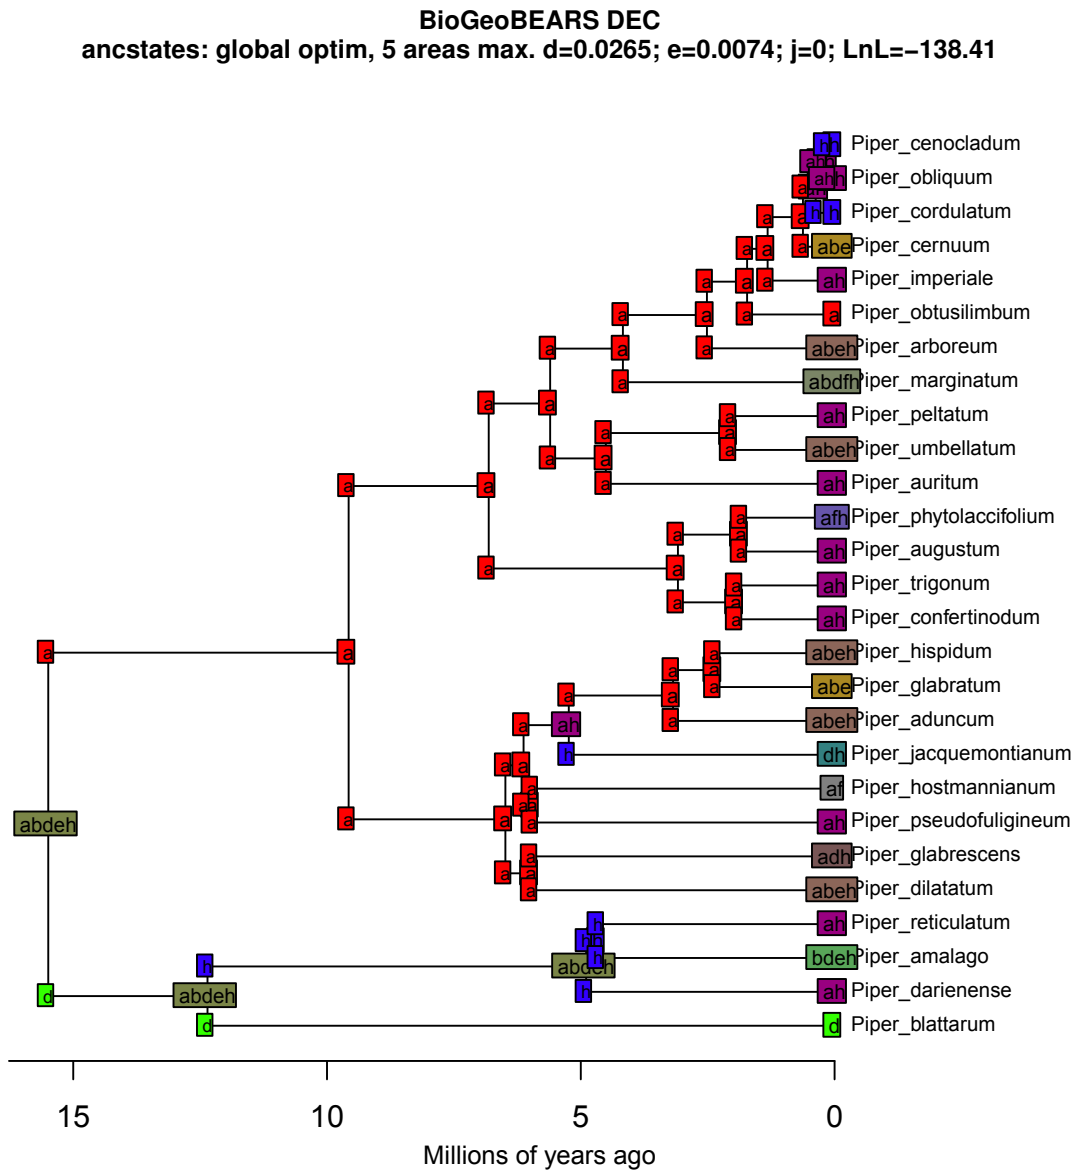



Figure S3: Clades of angiosperms

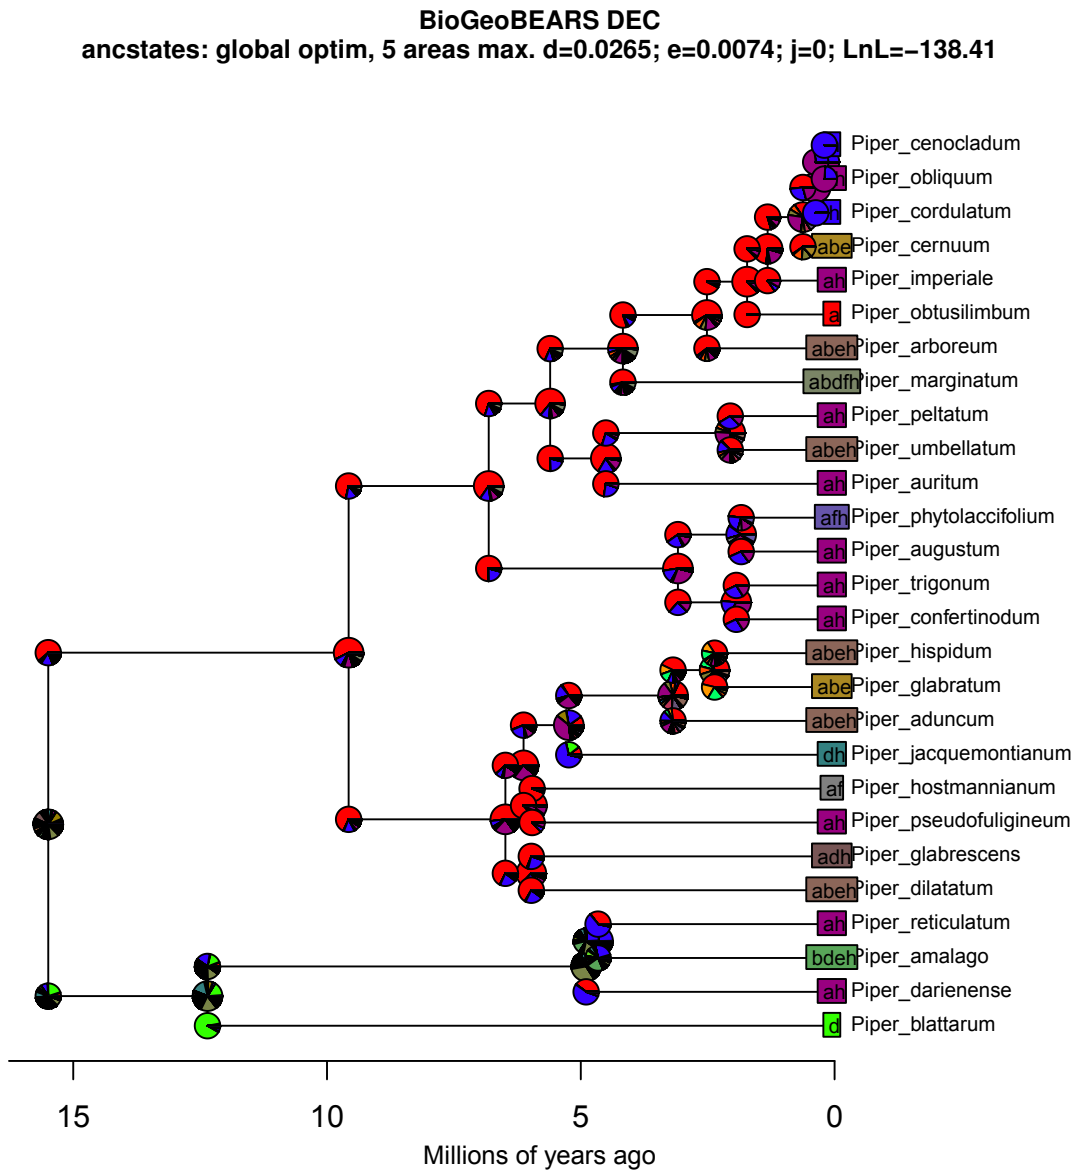

Figure S3: Clades of angiosperms

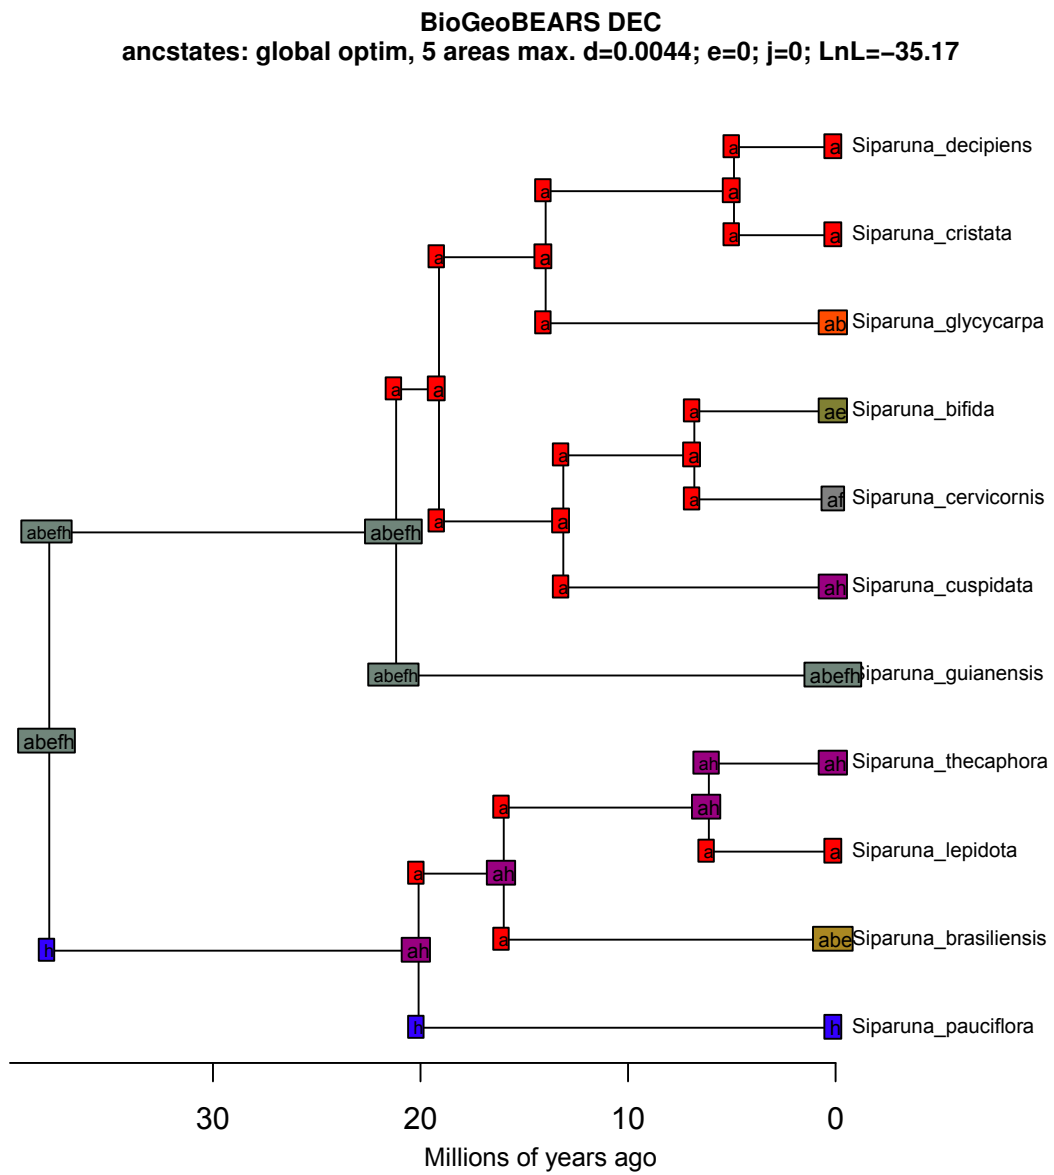

Figure S3: Clades of angiosperms

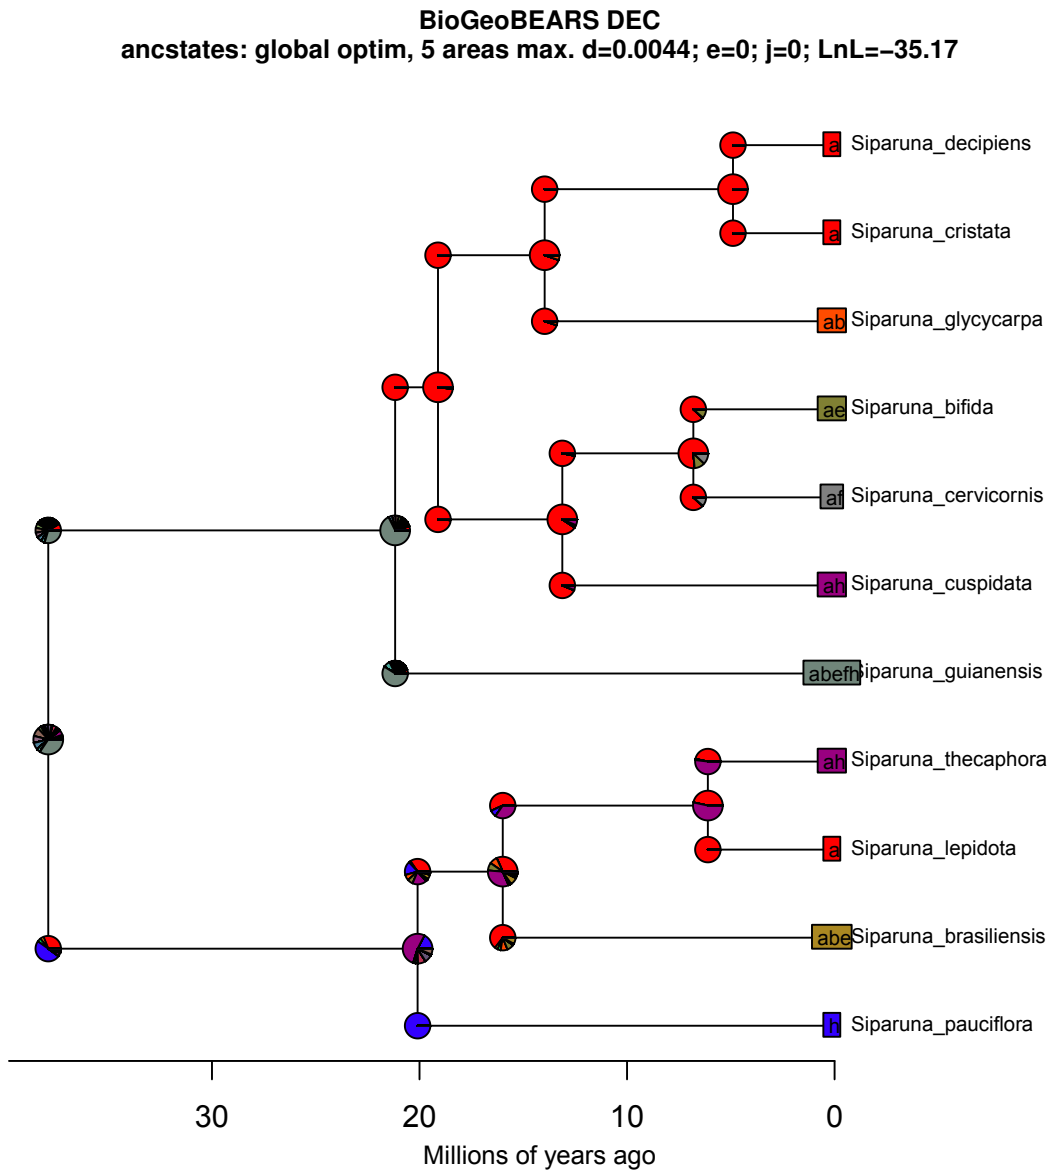

Figure S3: Clades of angiosperms

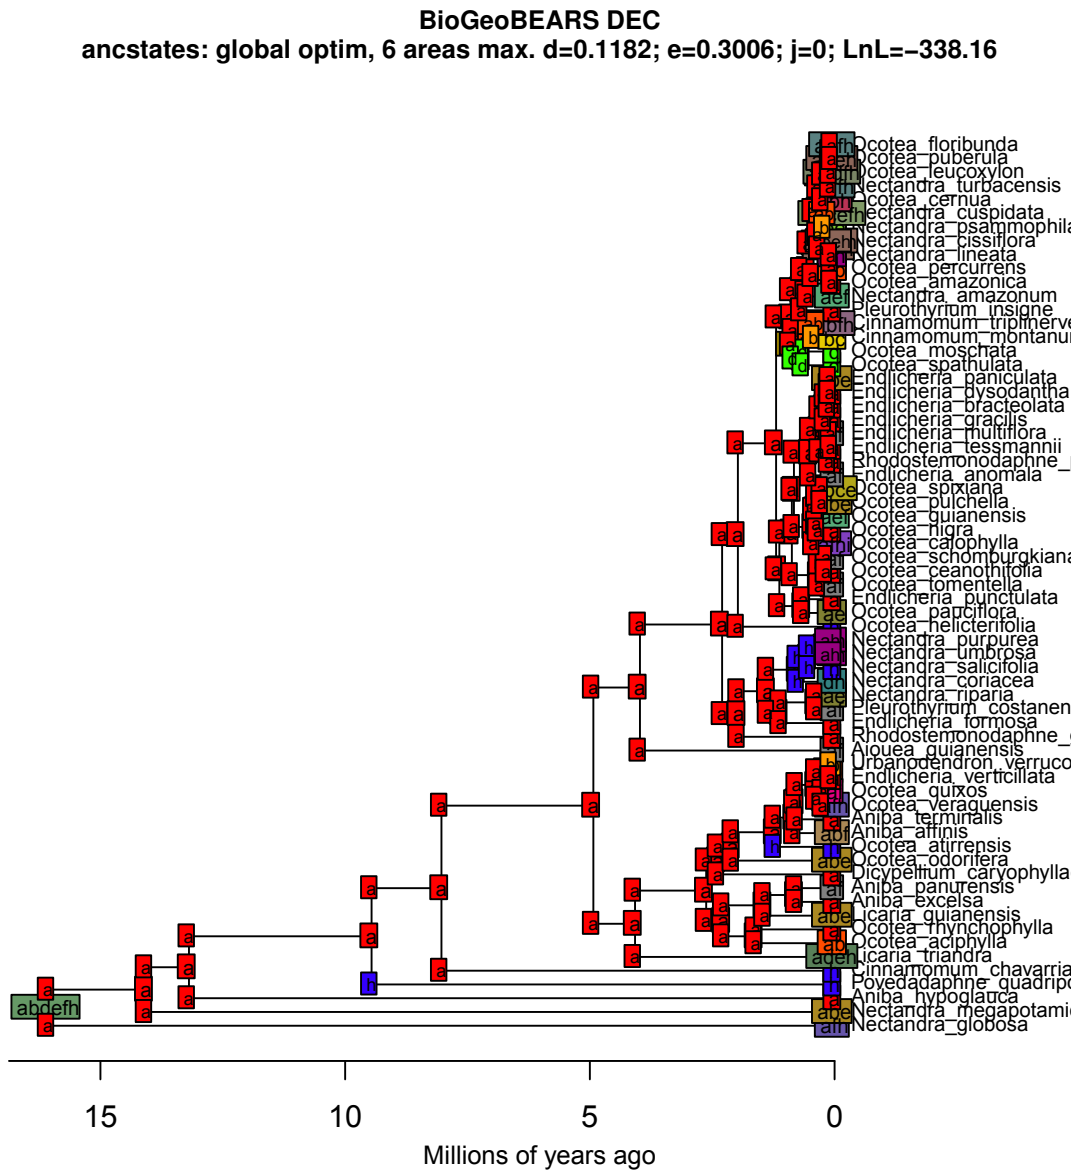

Figure S3: Clades of angiosperms

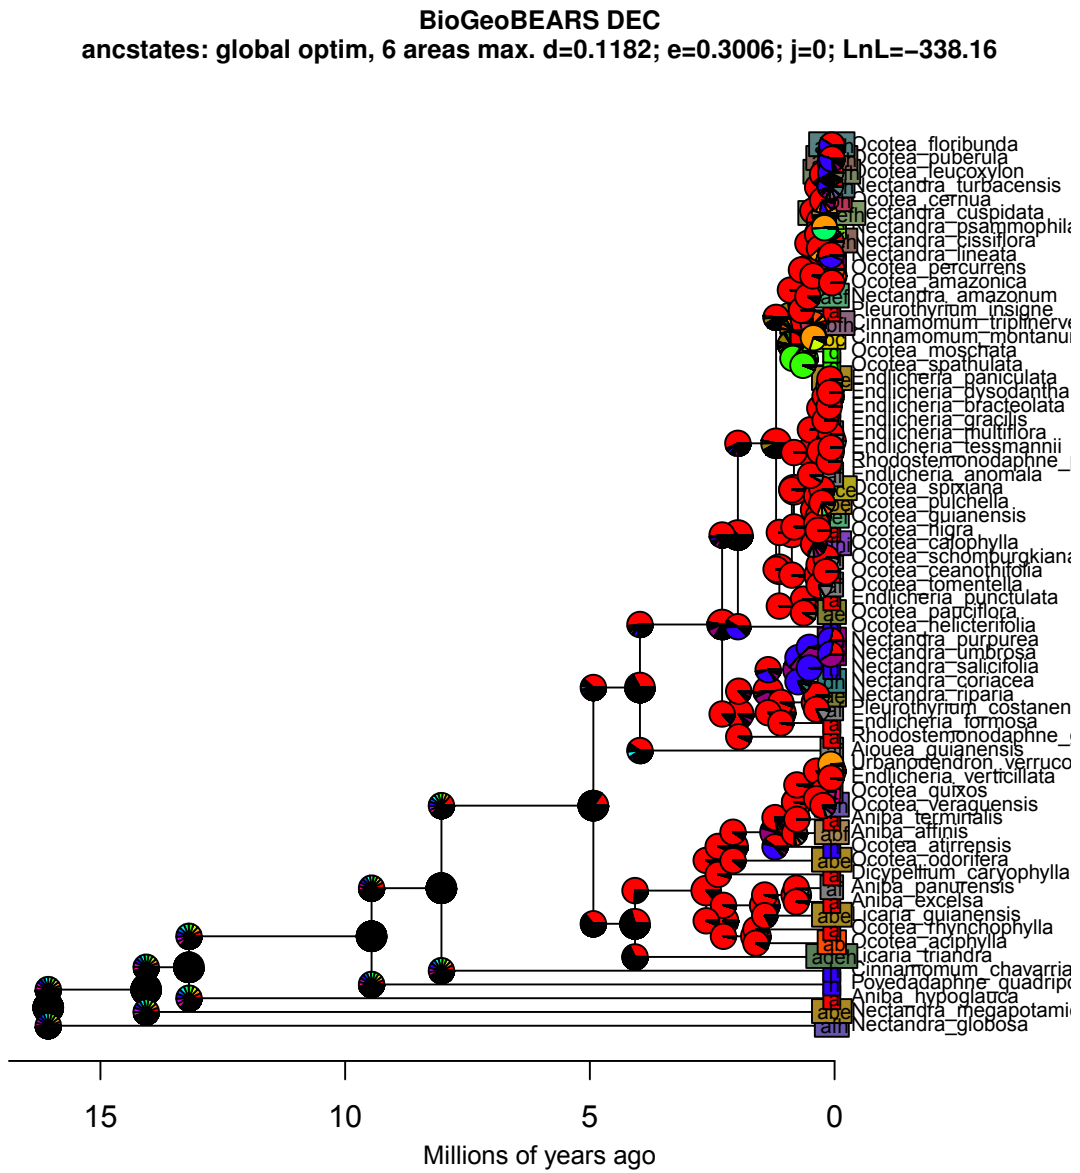

Figure S3: Clades of angiosperms

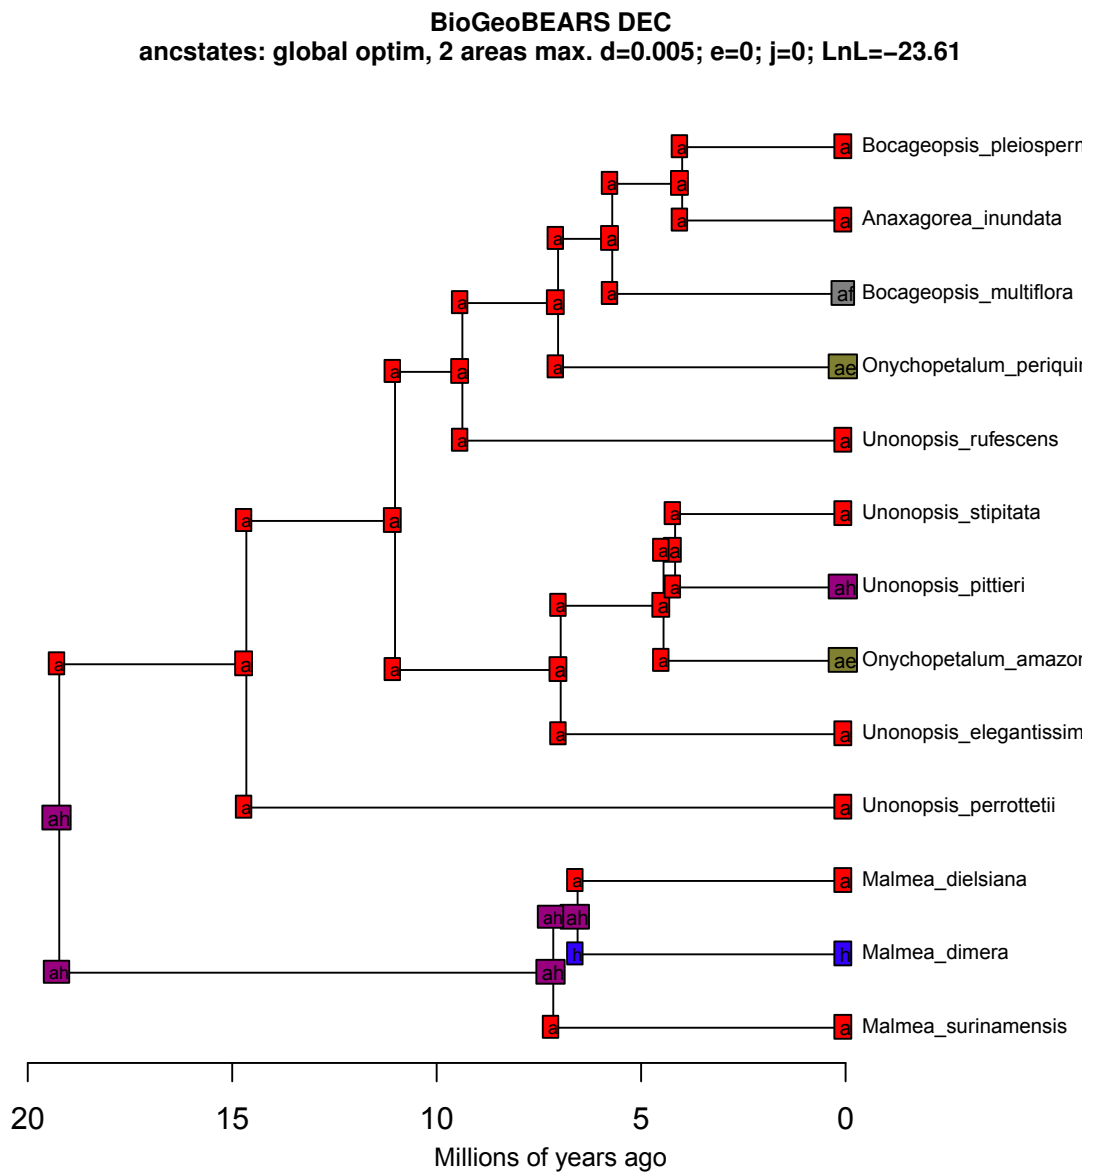

Figure S3: Clades of angiosperms

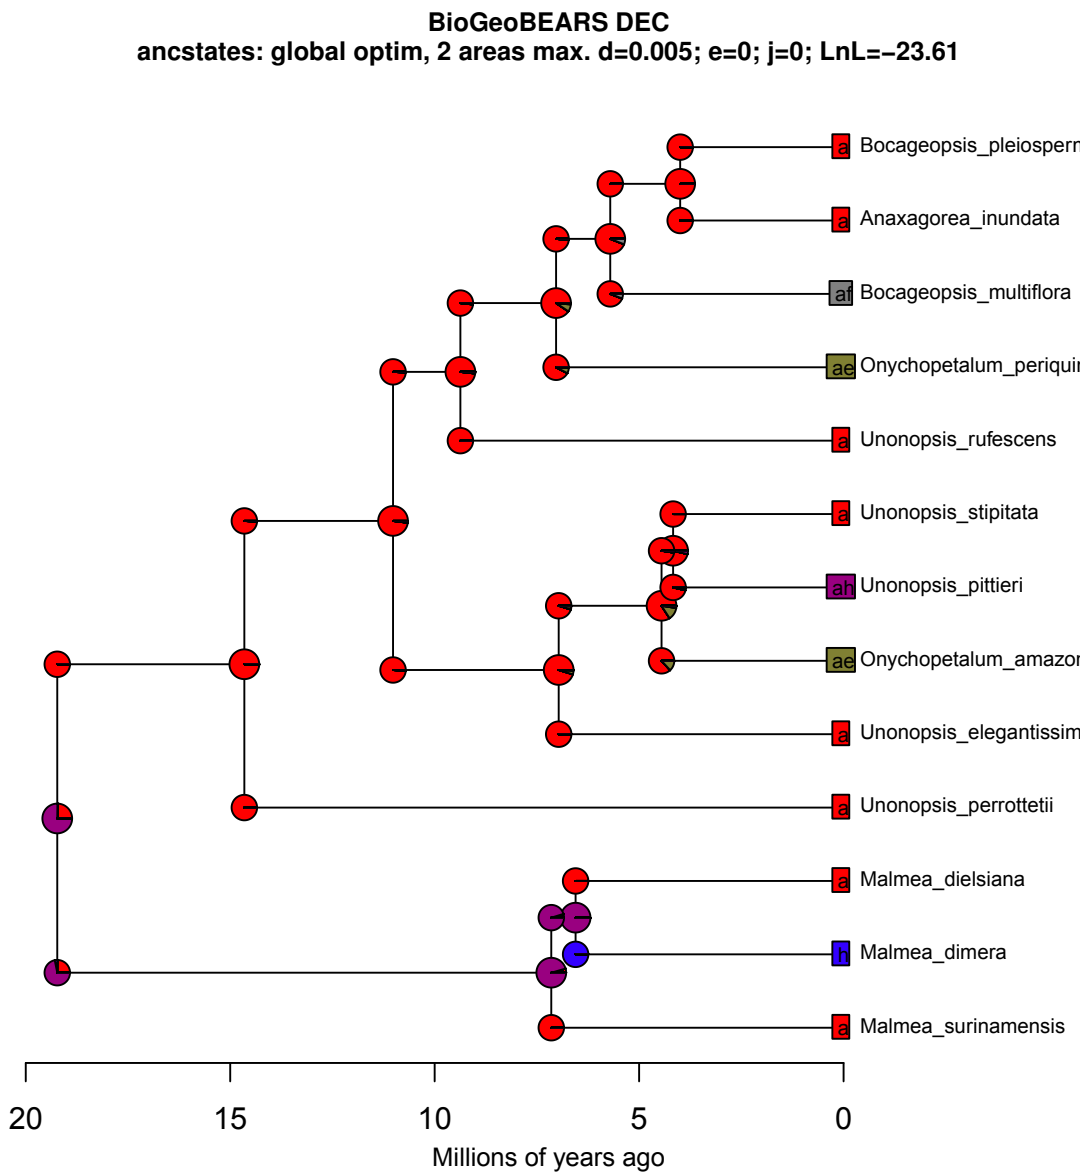

Figure S3: Clades of angiosperms

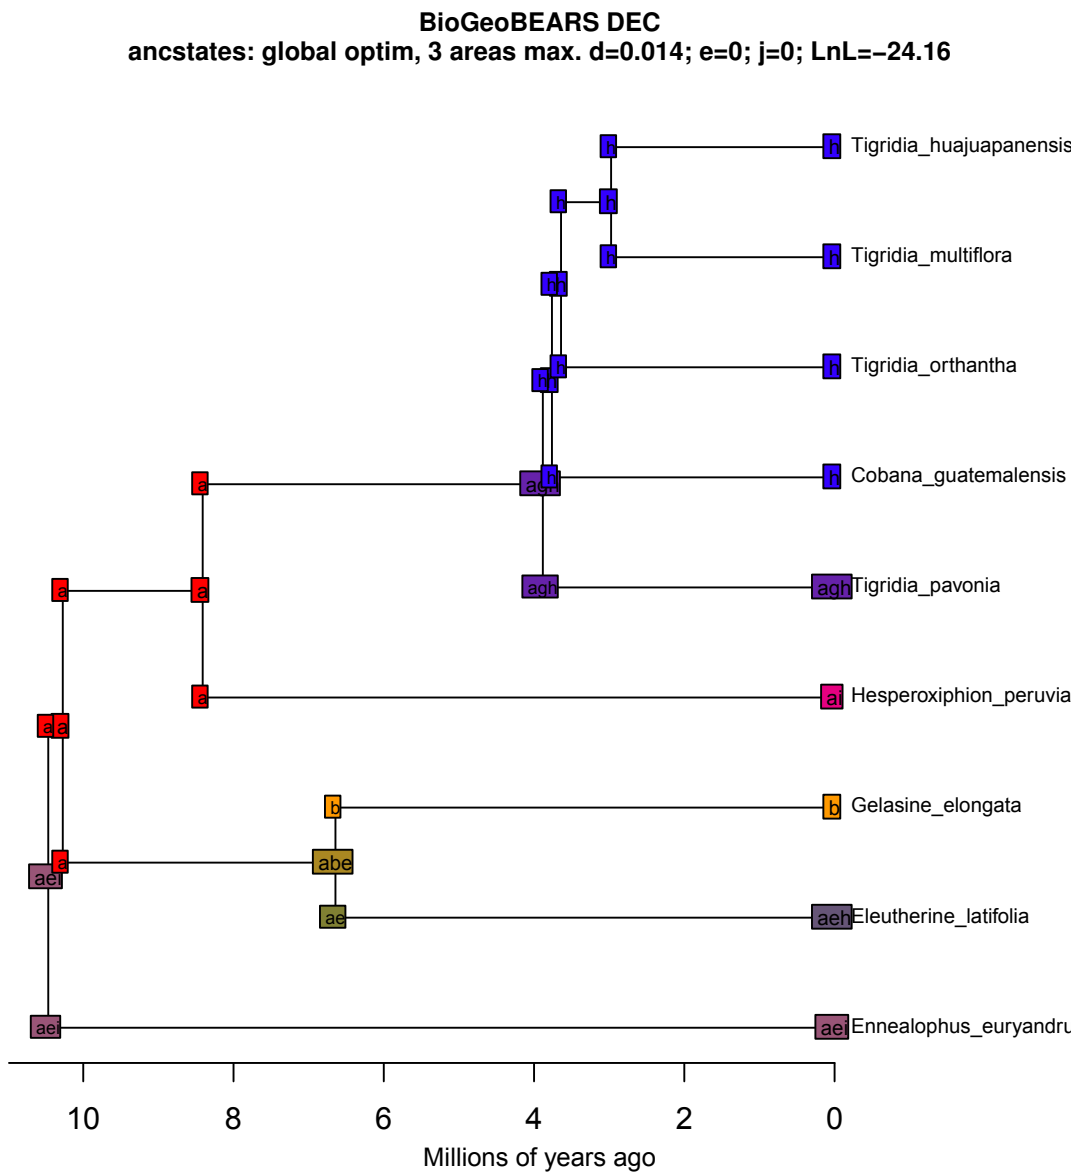



Figure S3: Clades of angiosperms

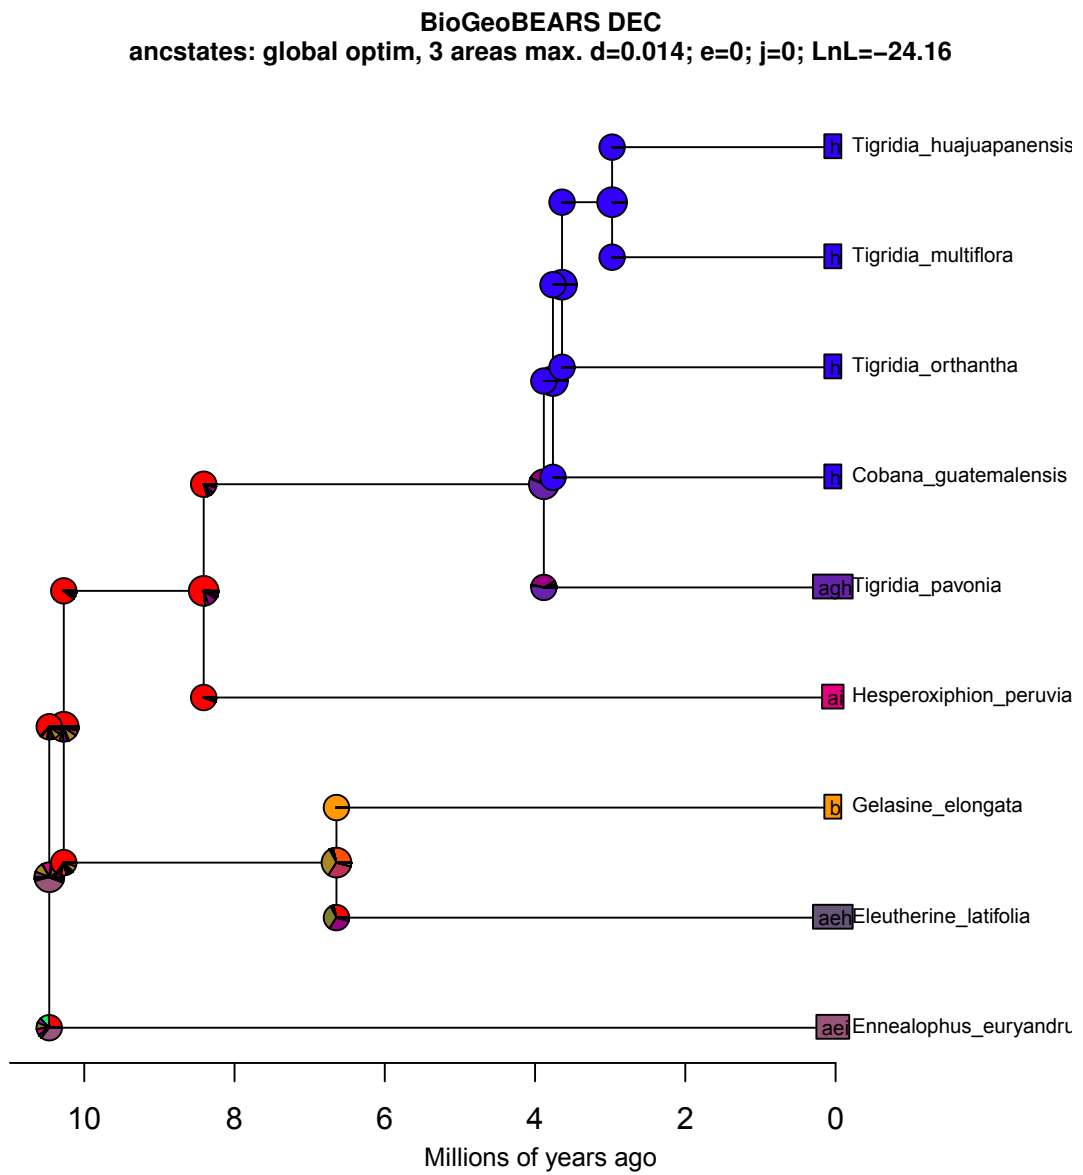

Figure S3: Clades of angiosperms

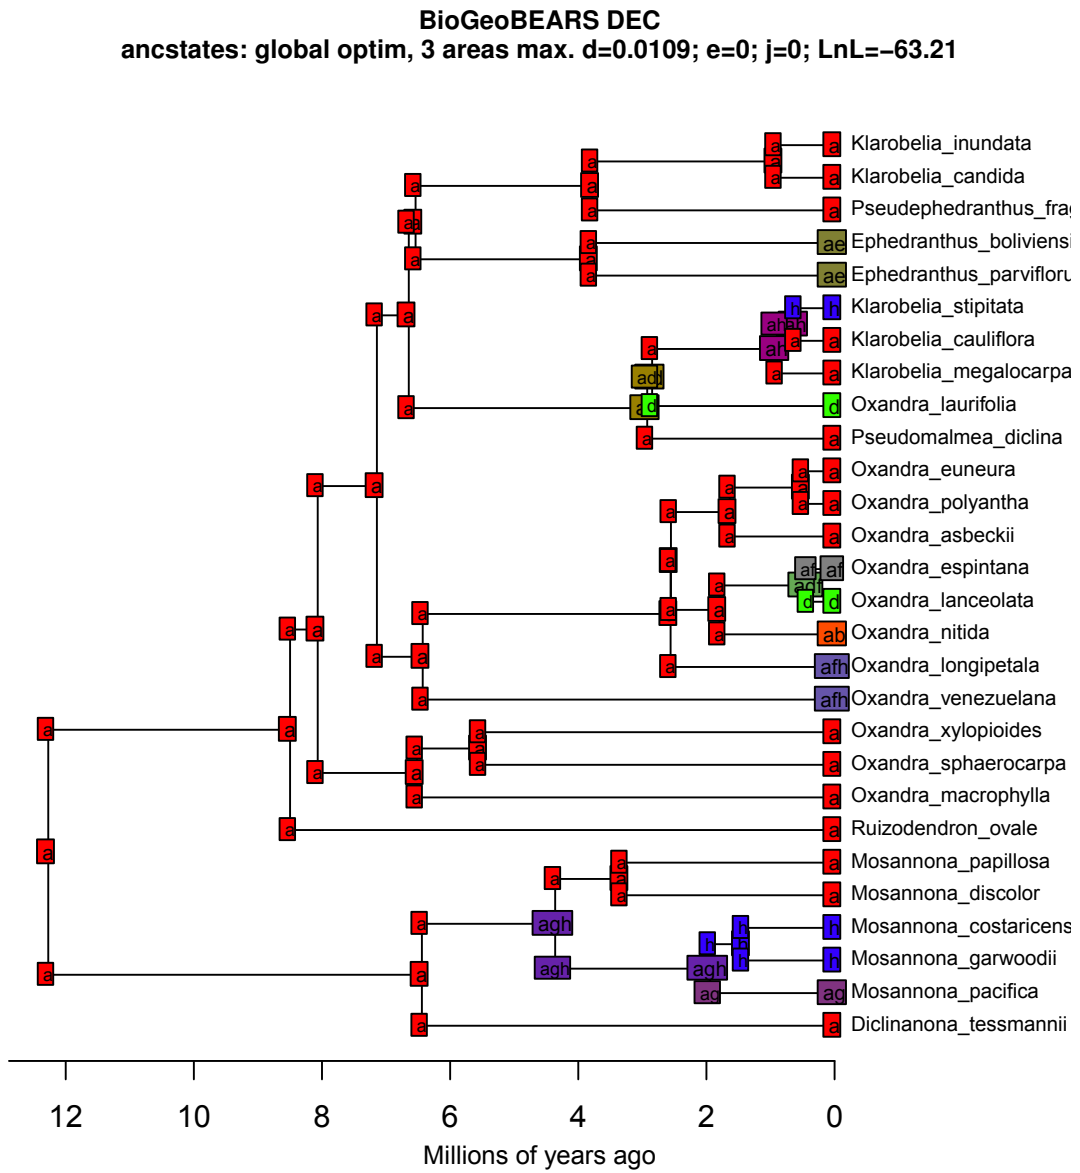

Figure S3: Clades of angiosperms

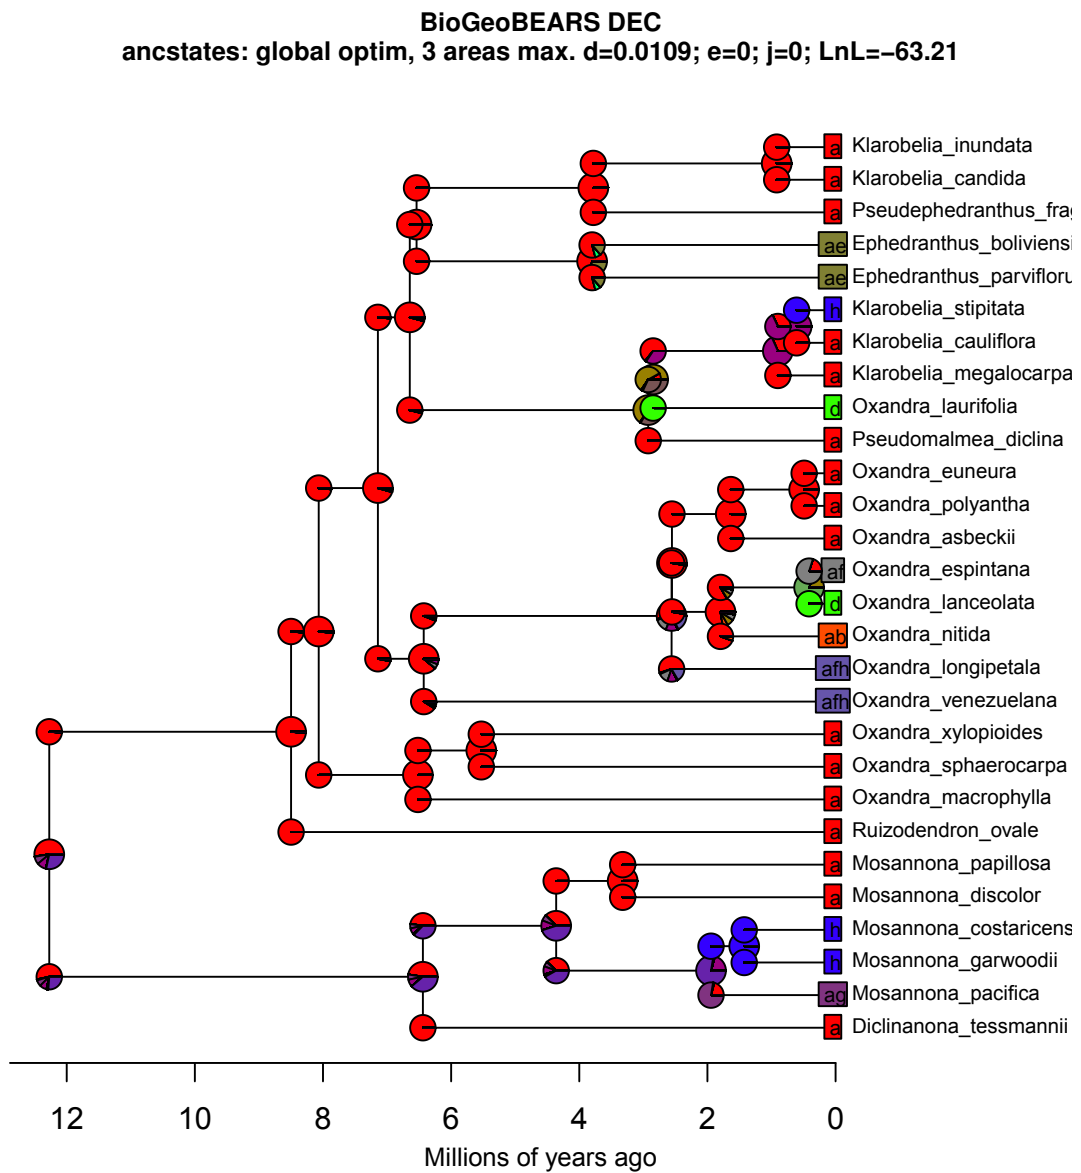

Figure S3: Clades of angiosperms

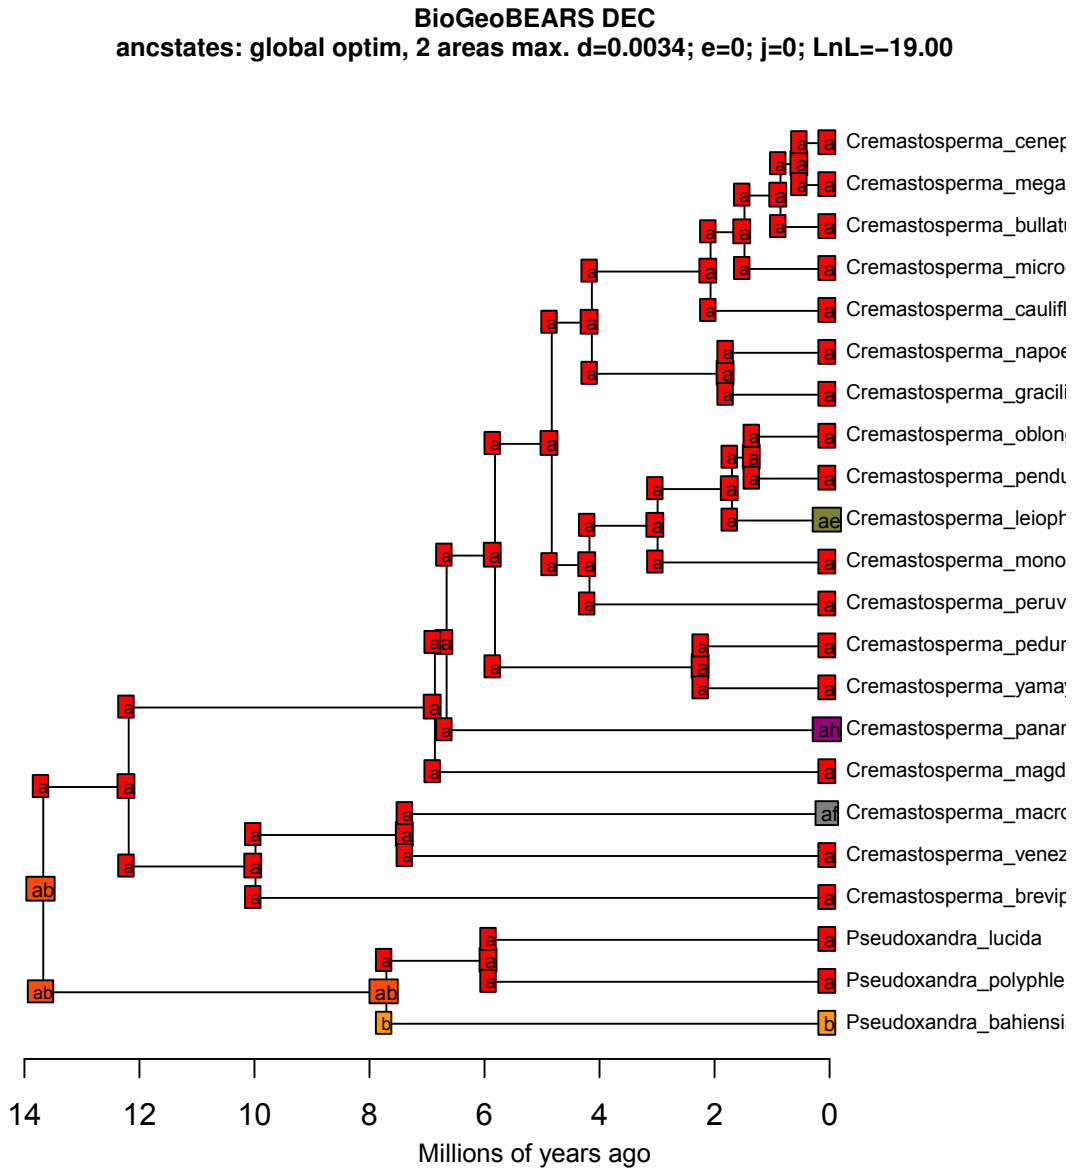

Figure S3: Clades of angiosperms

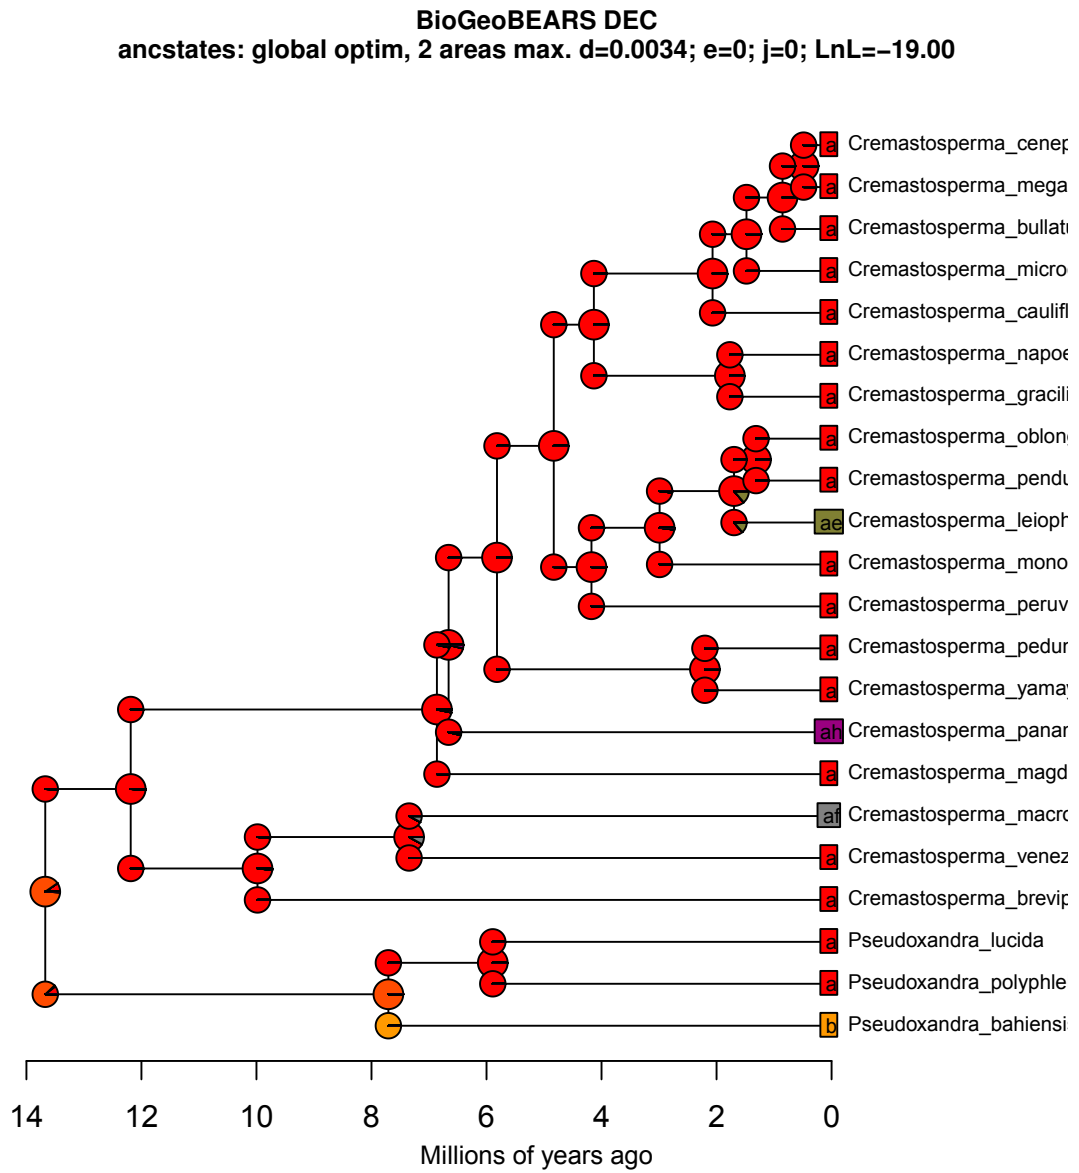

Figure S3: Clades of angiosperms

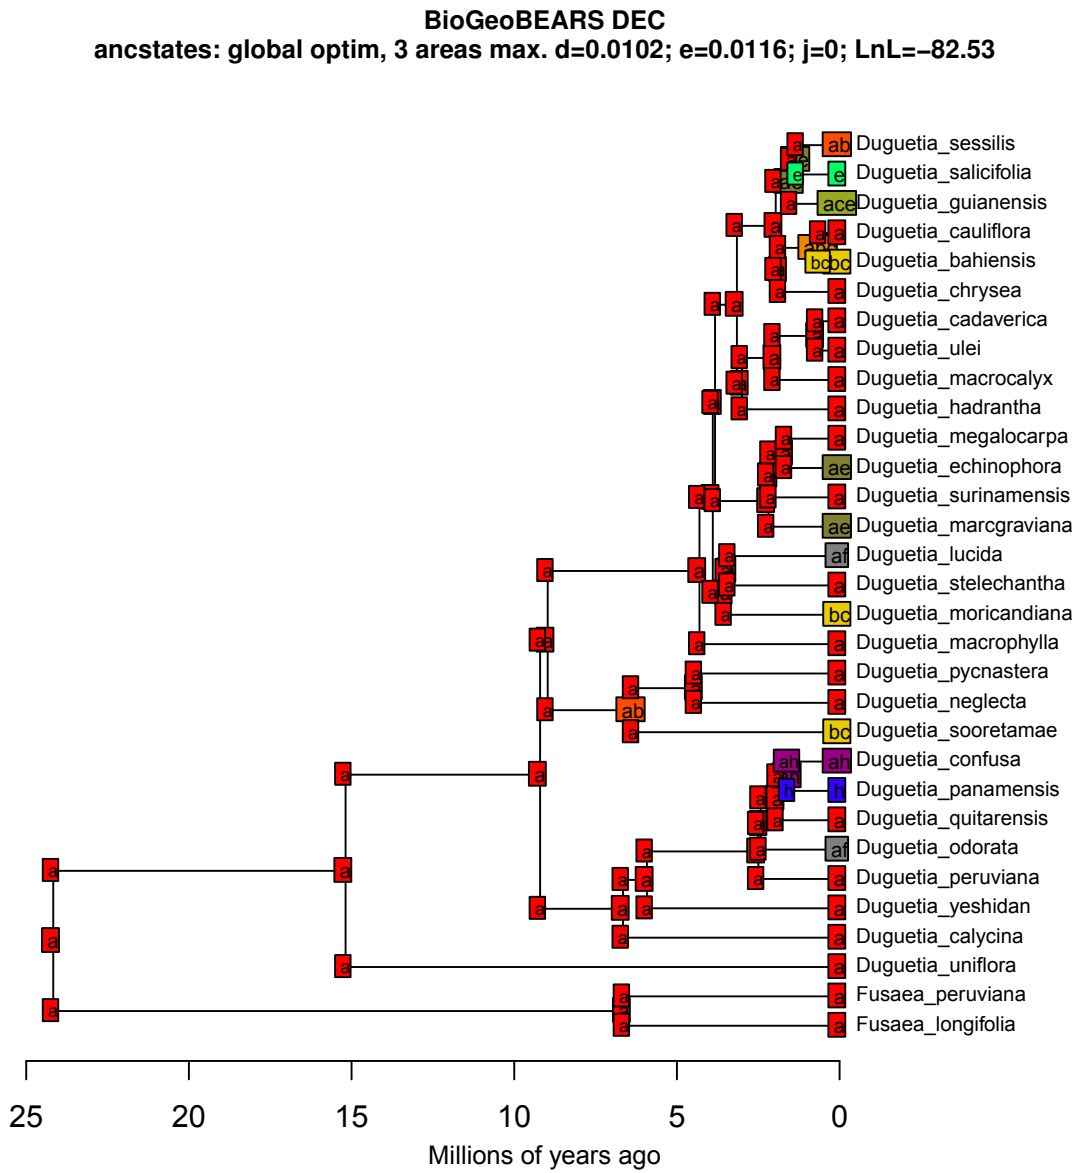

Figure S3: Clades of angiosperms

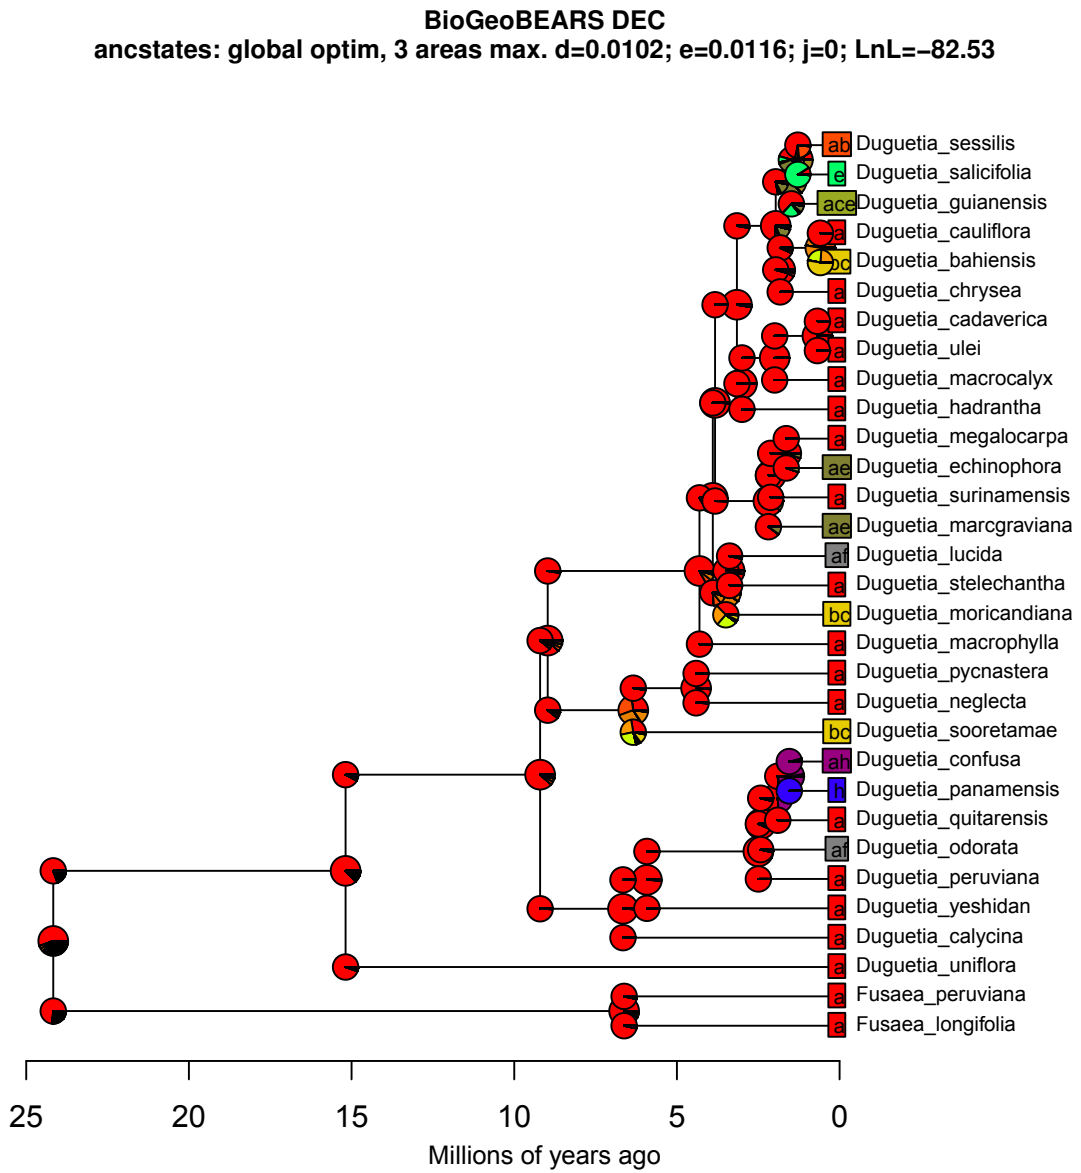

Figure S3: Clades of angiosperms

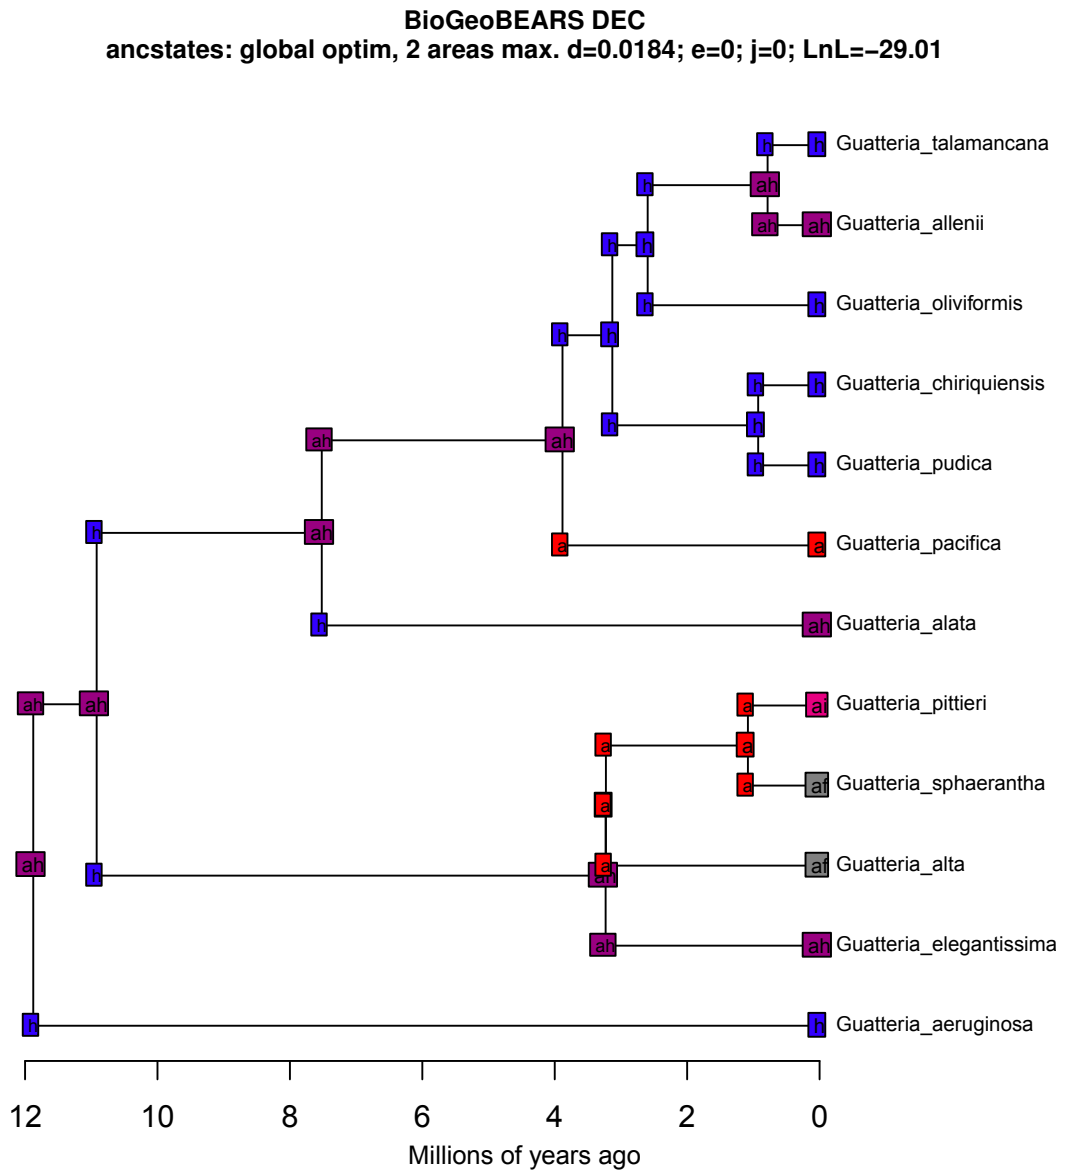



Figure S3: Clades of angiosperms

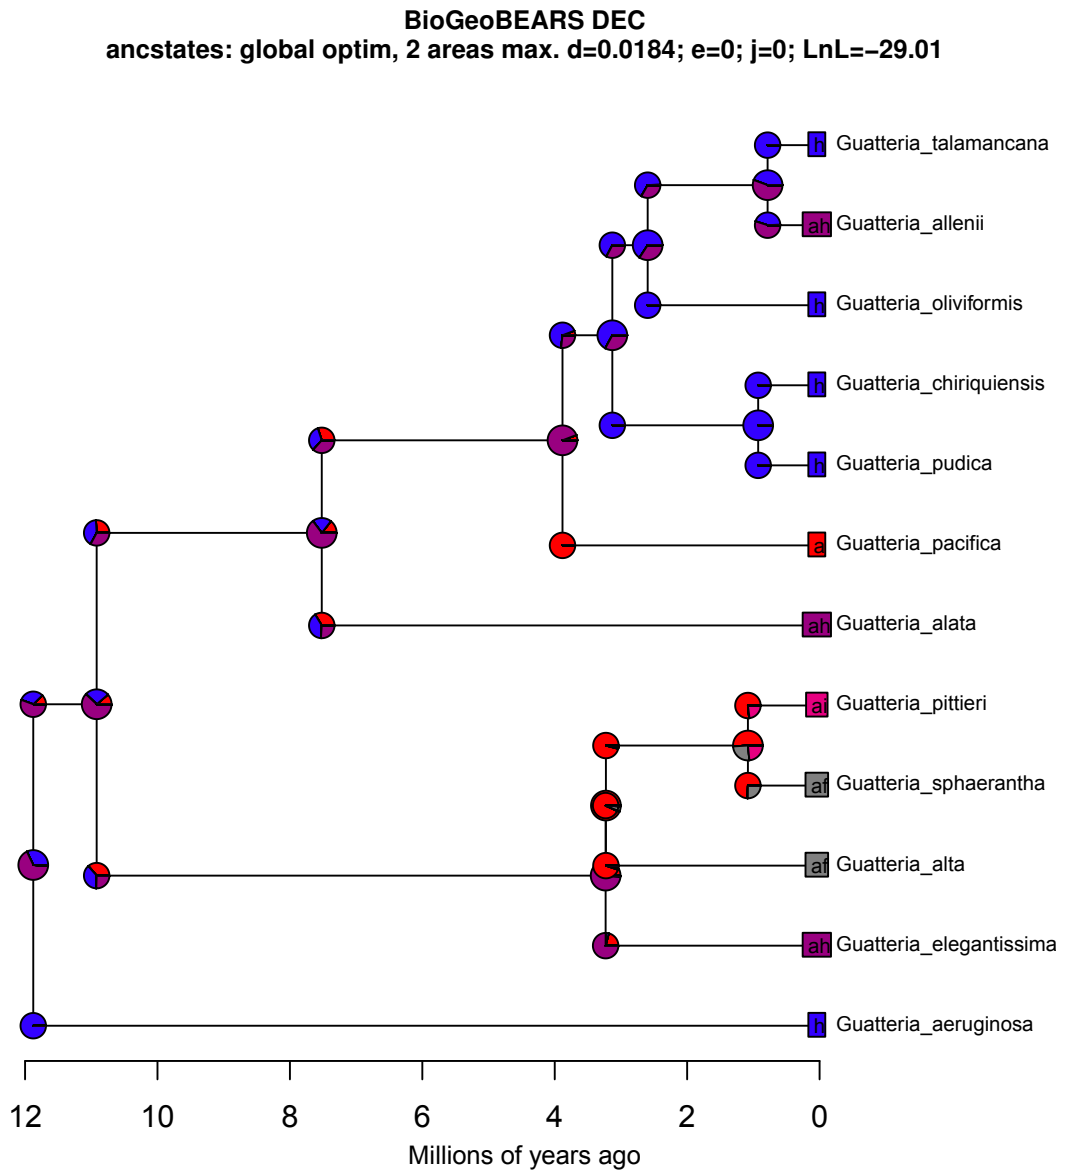

Figure S3: Clades of angiosperms

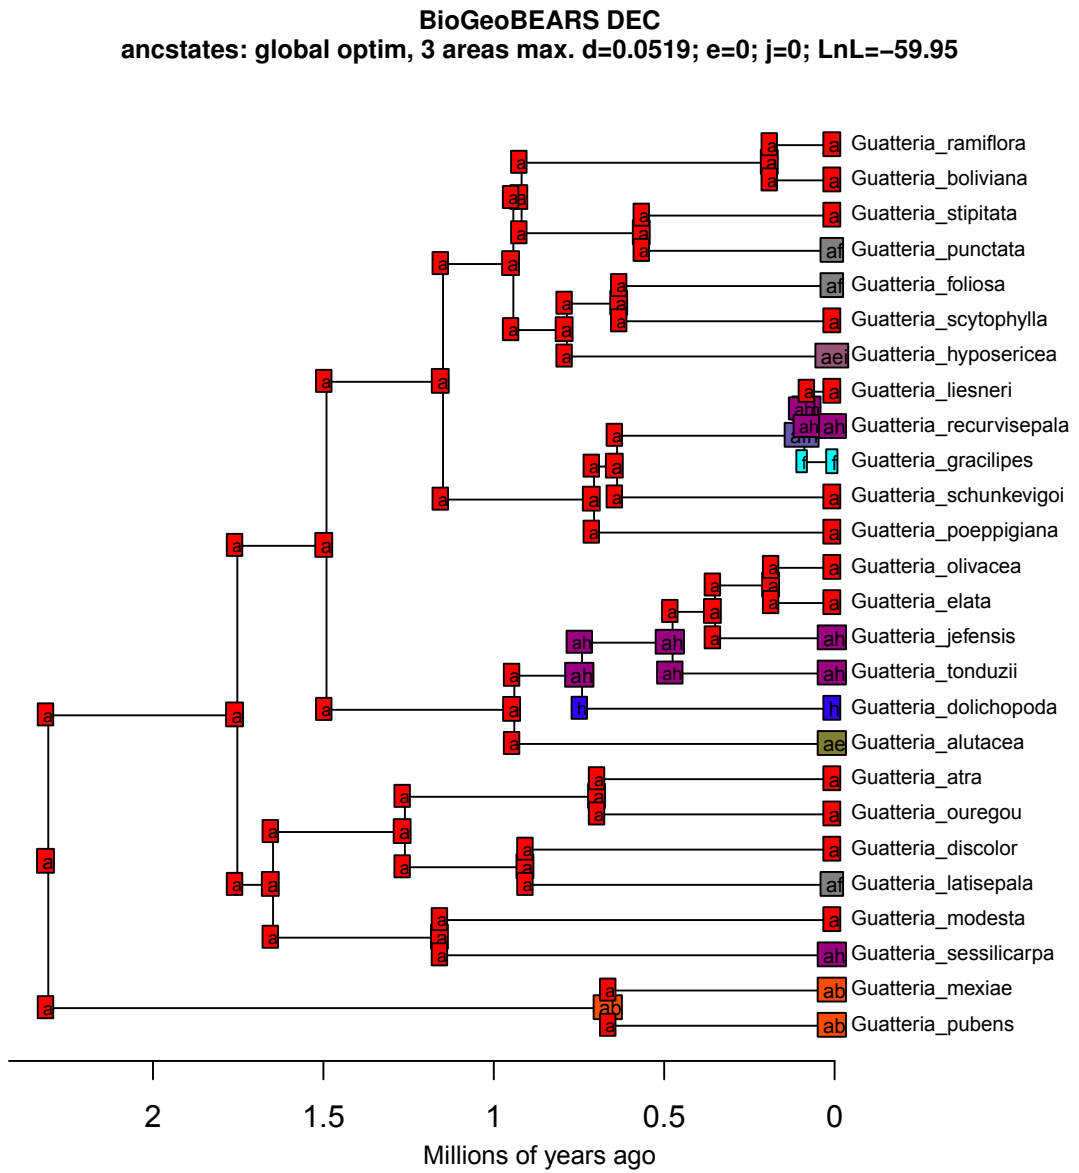

Figure S3: Clades of angiosperms

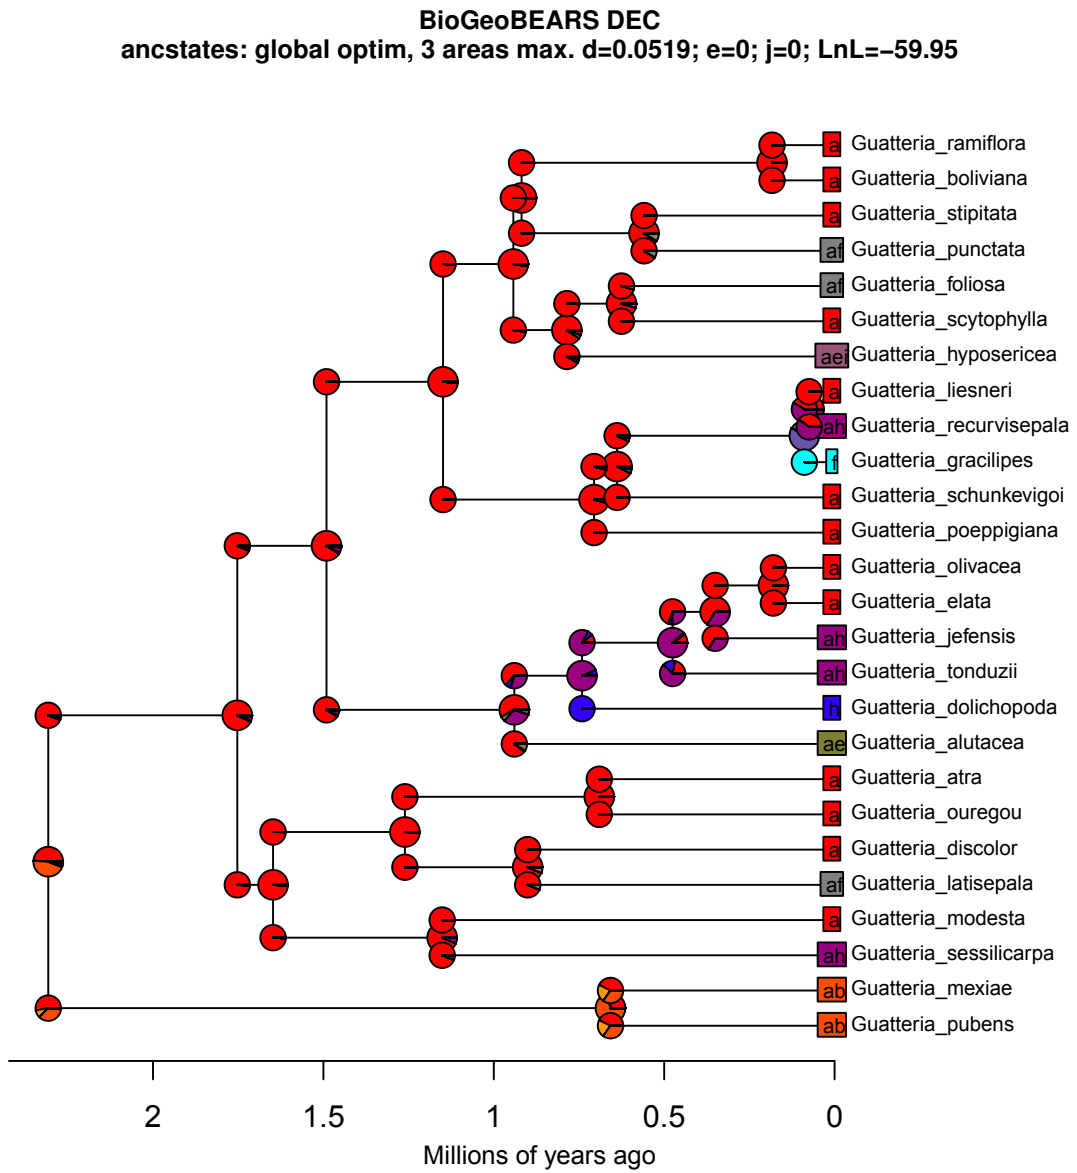

Figure S3: Clades of angiosperms

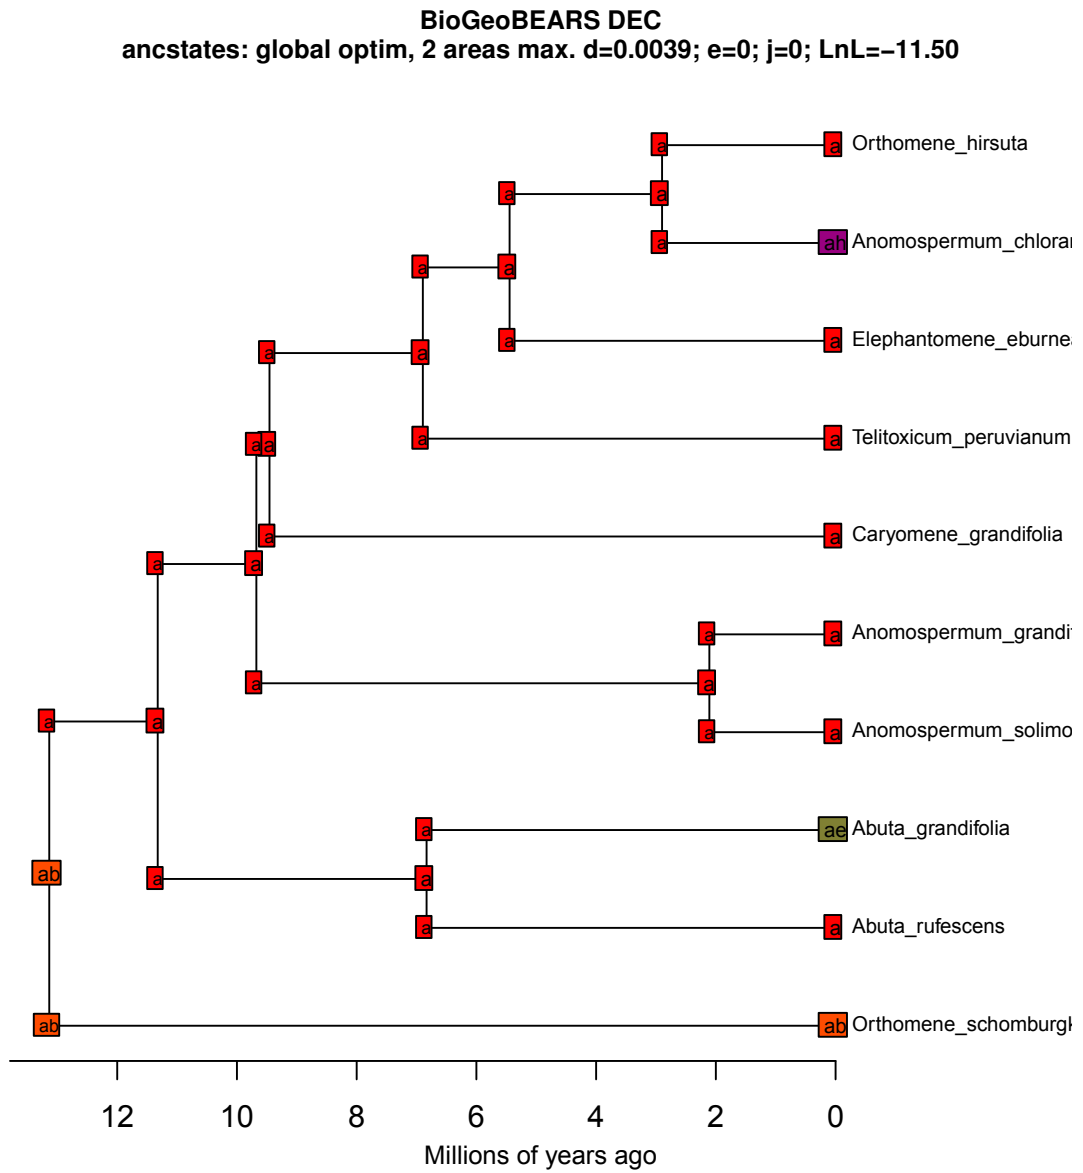

Figure S3: Clades of angiosperms

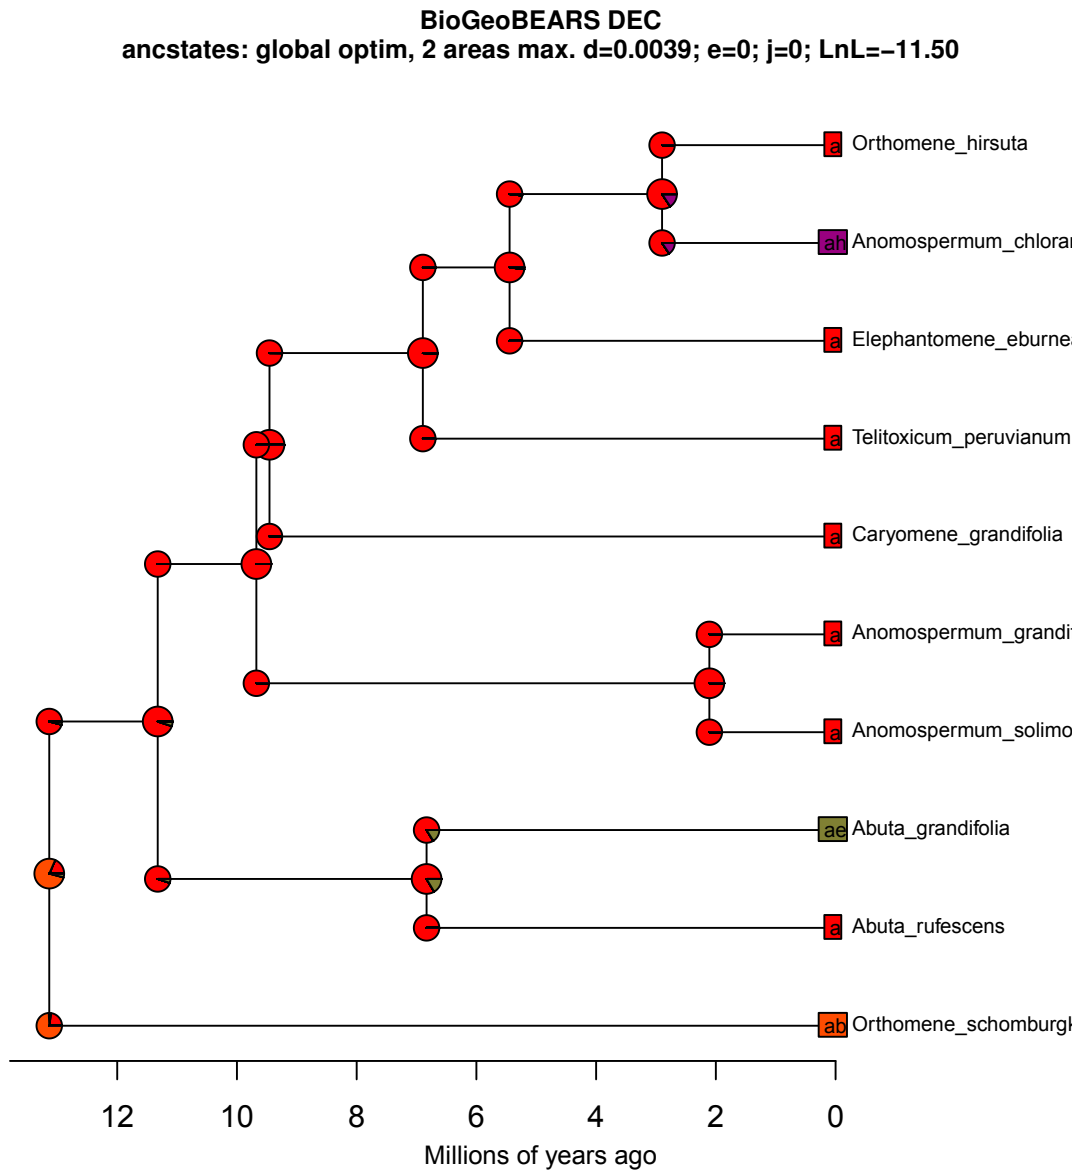

Figure S3: Clades of angiosperms

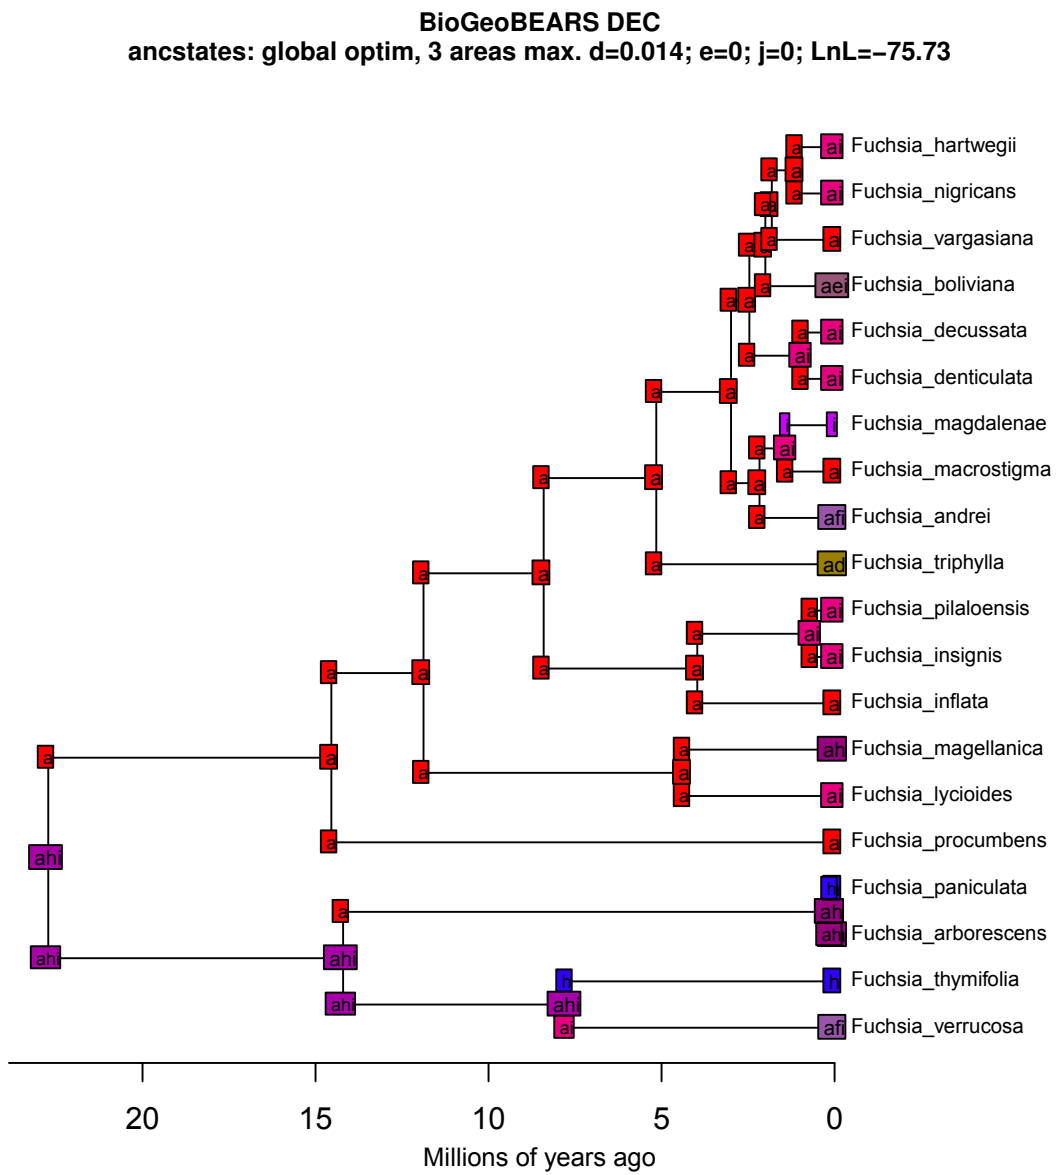

Figure S3: Clades of angiosperms

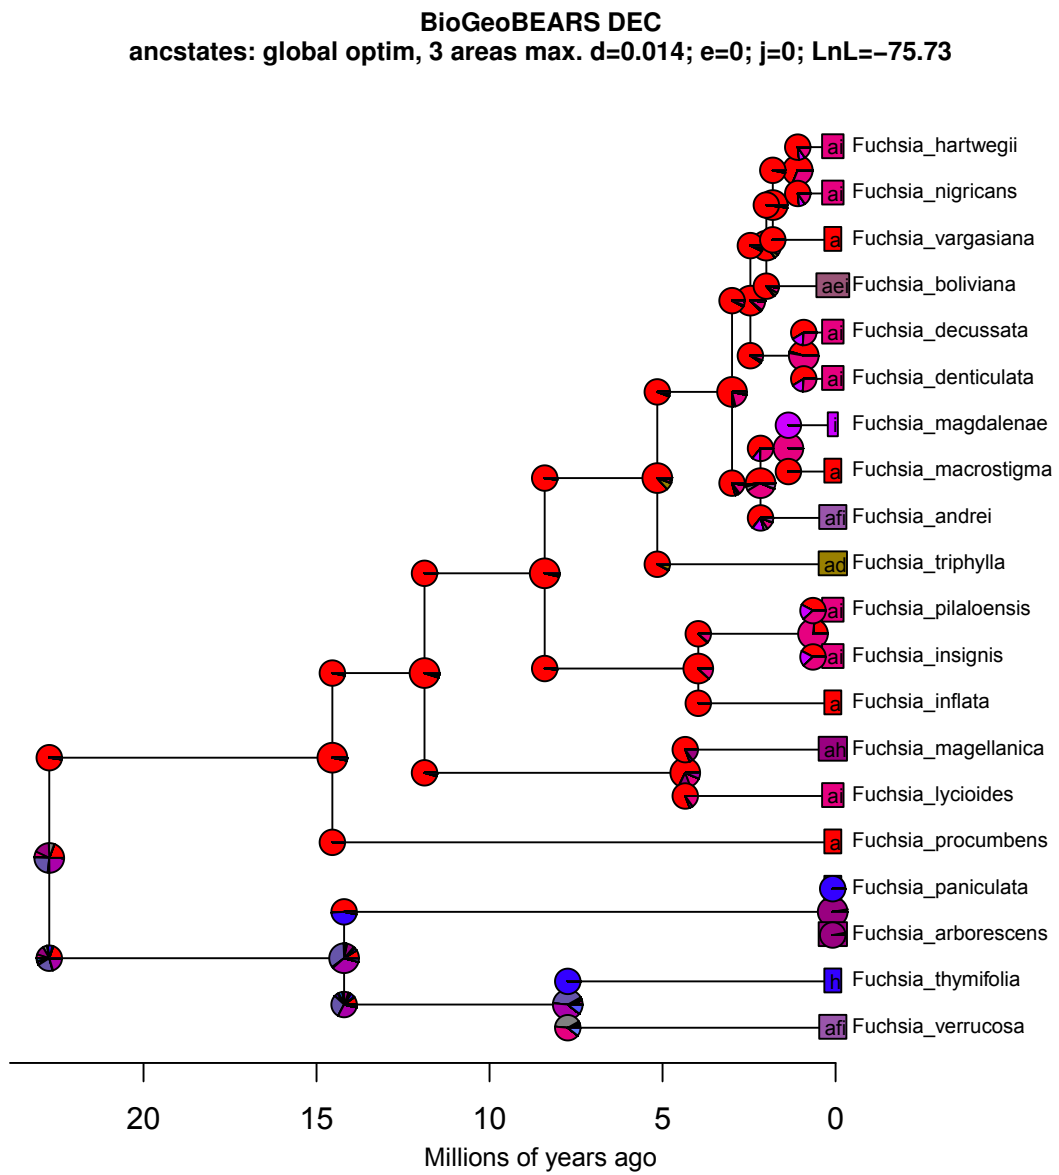

Figure S3: Clades of angiosperms

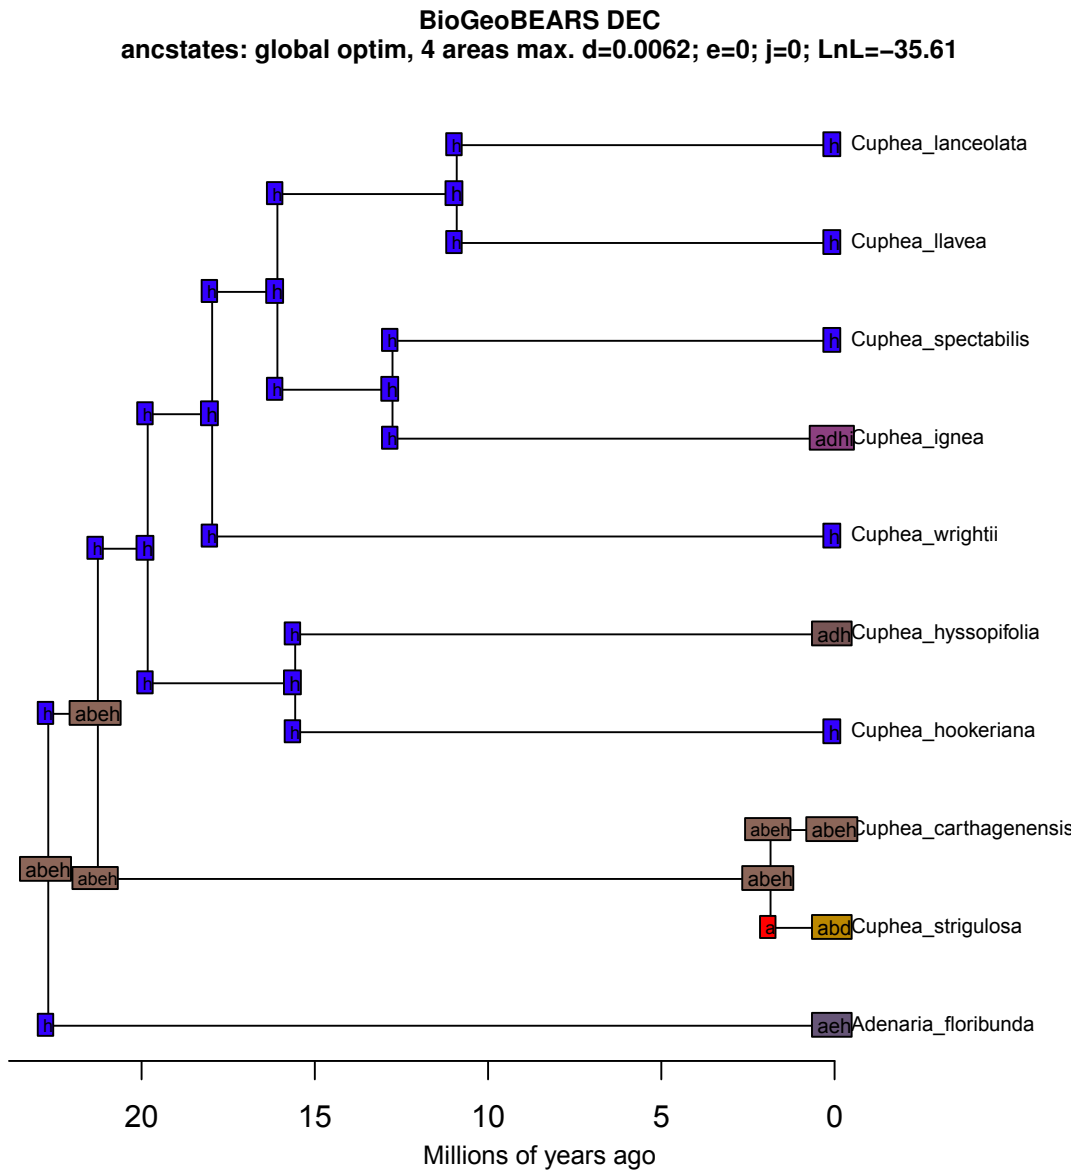



Figure S3: Clades of angiosperms

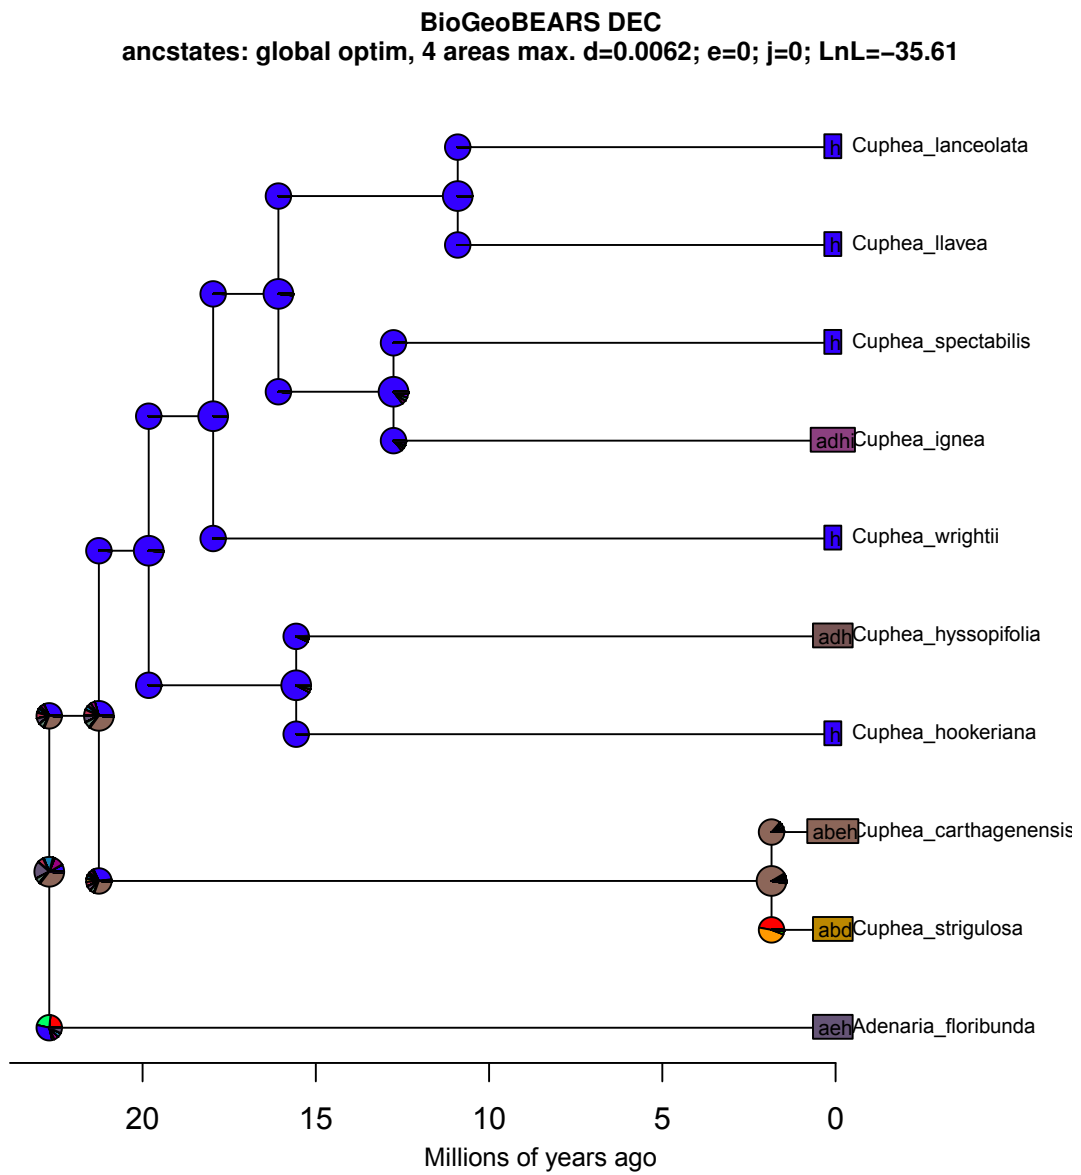

Figure S3: Clades of angiosperms

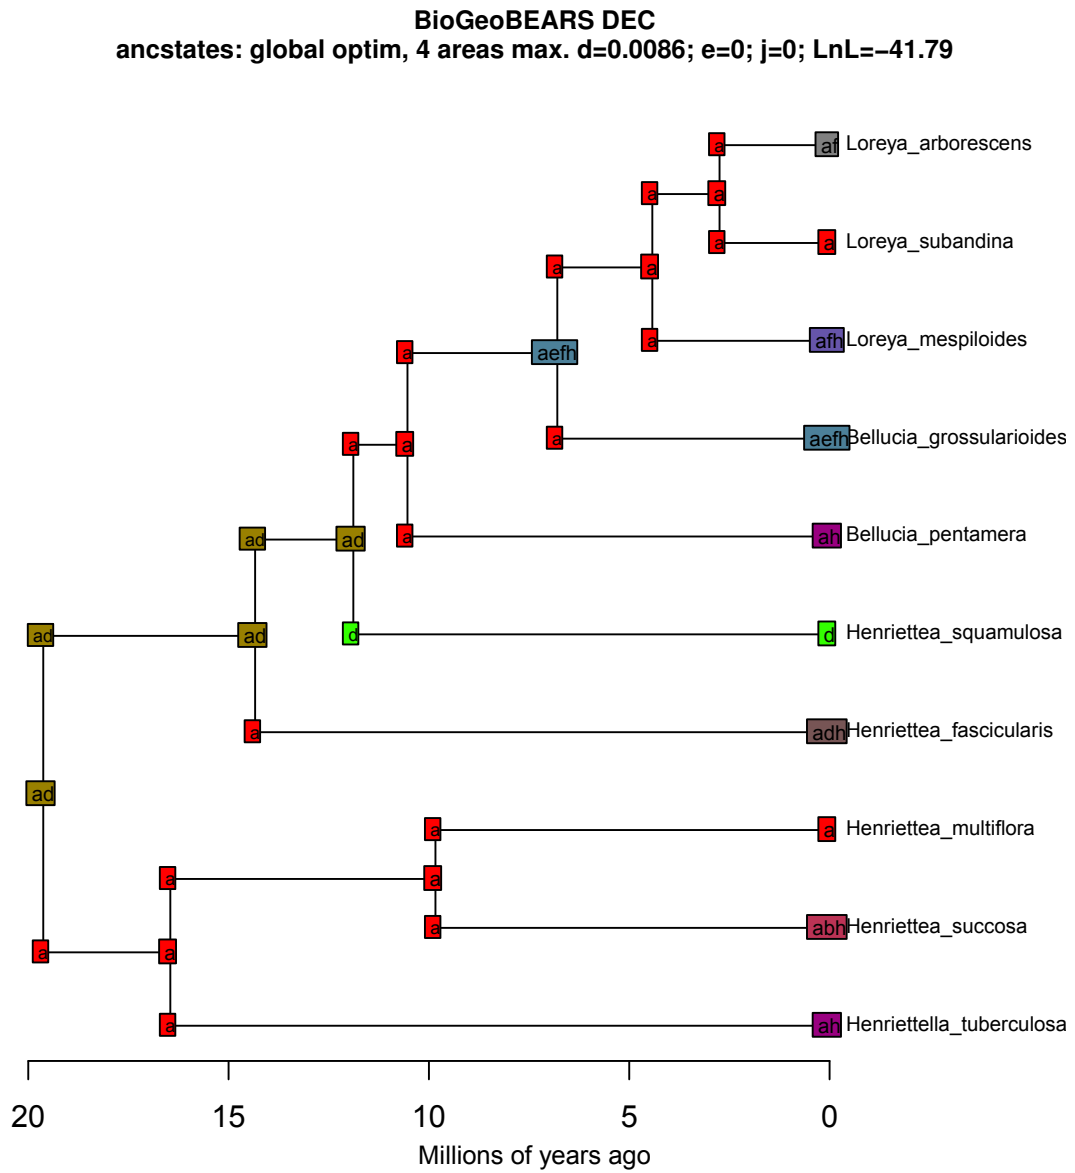

Figure S3: Clades of angiosperms

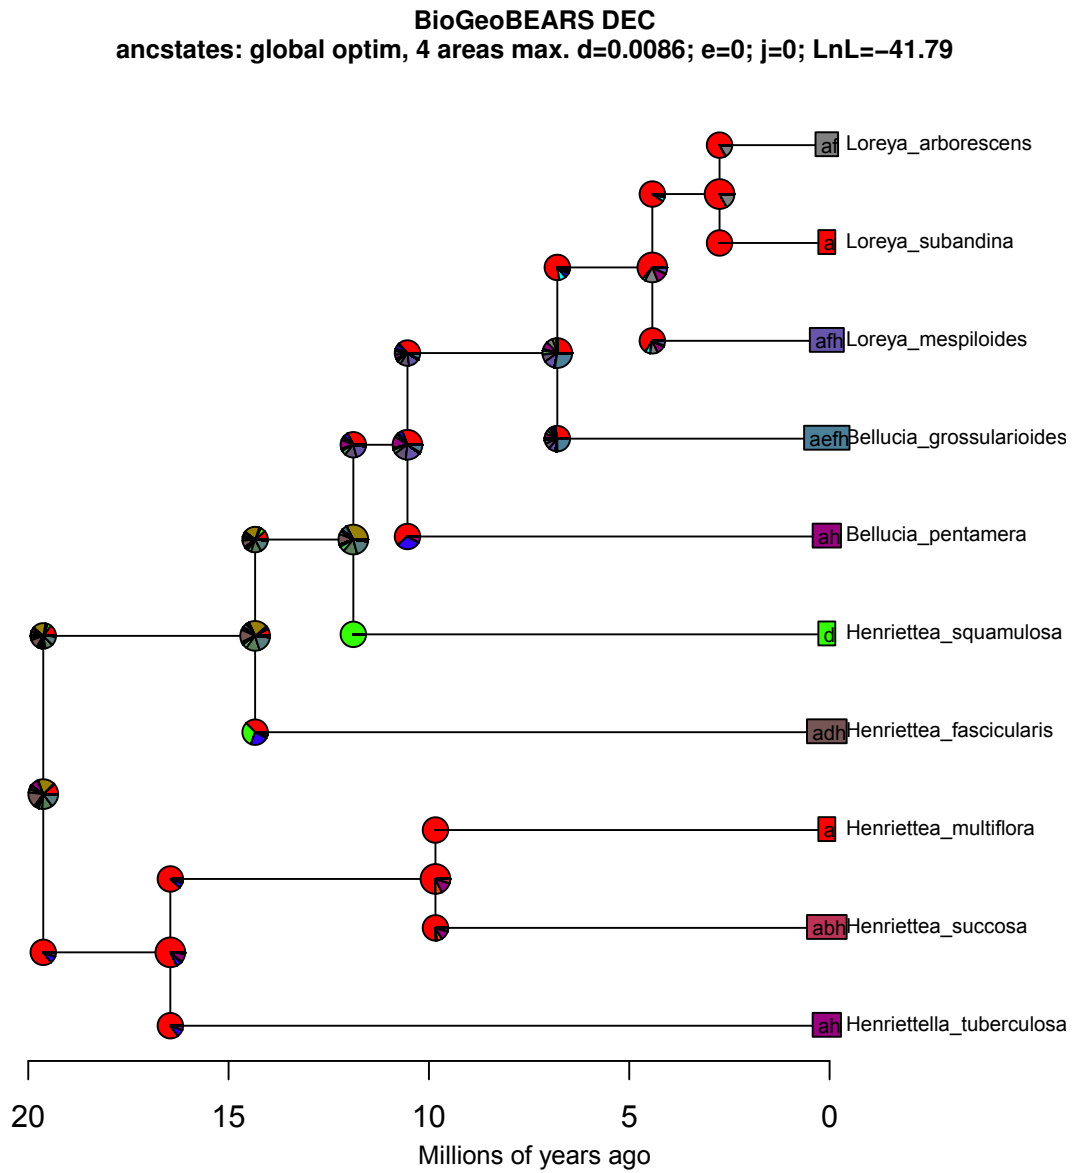





Figure S3: Clades of angiosperms

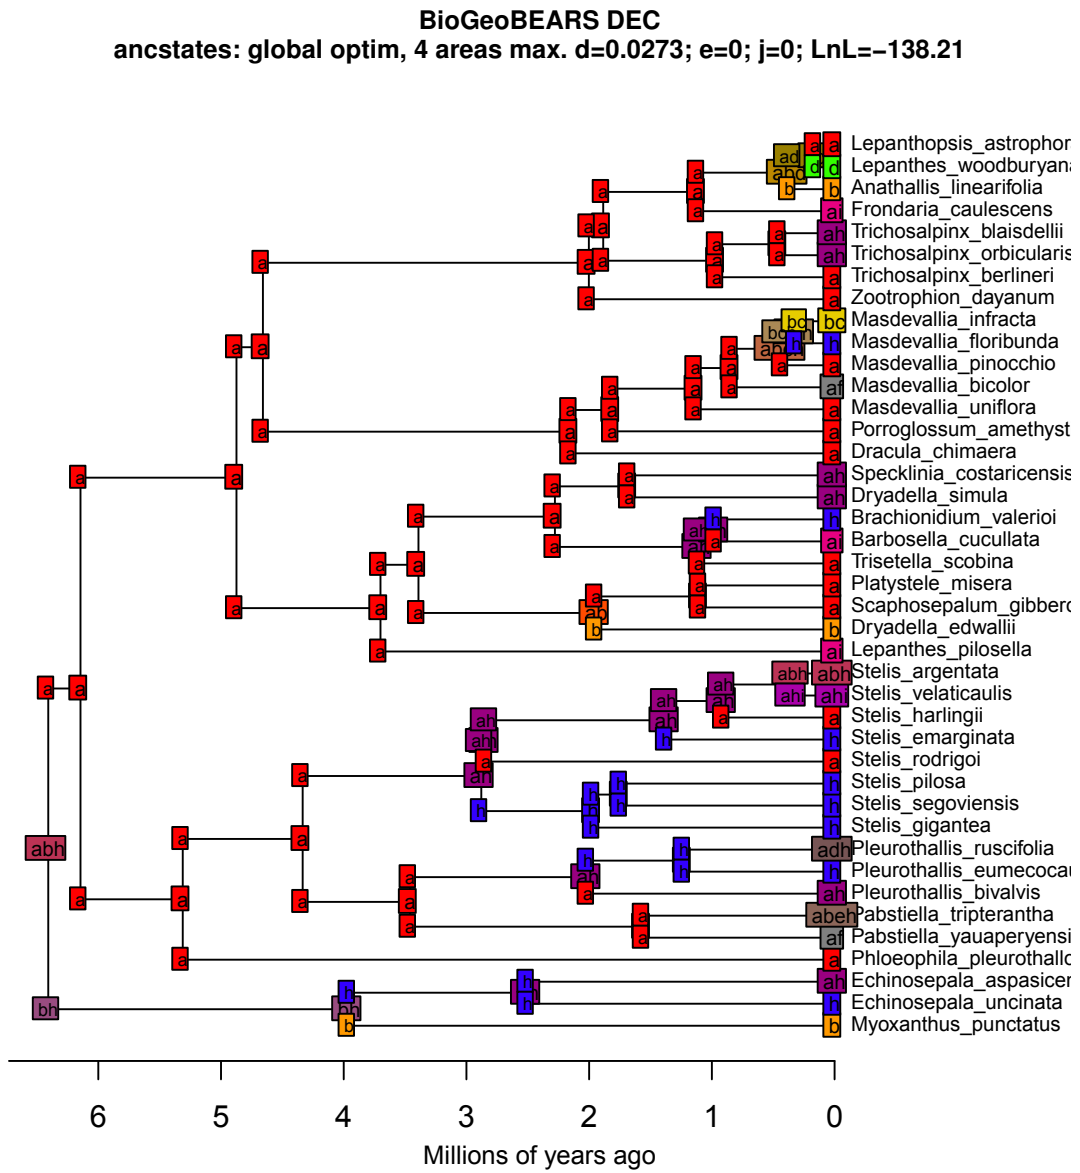

Figure S3: Clades of angiosperms

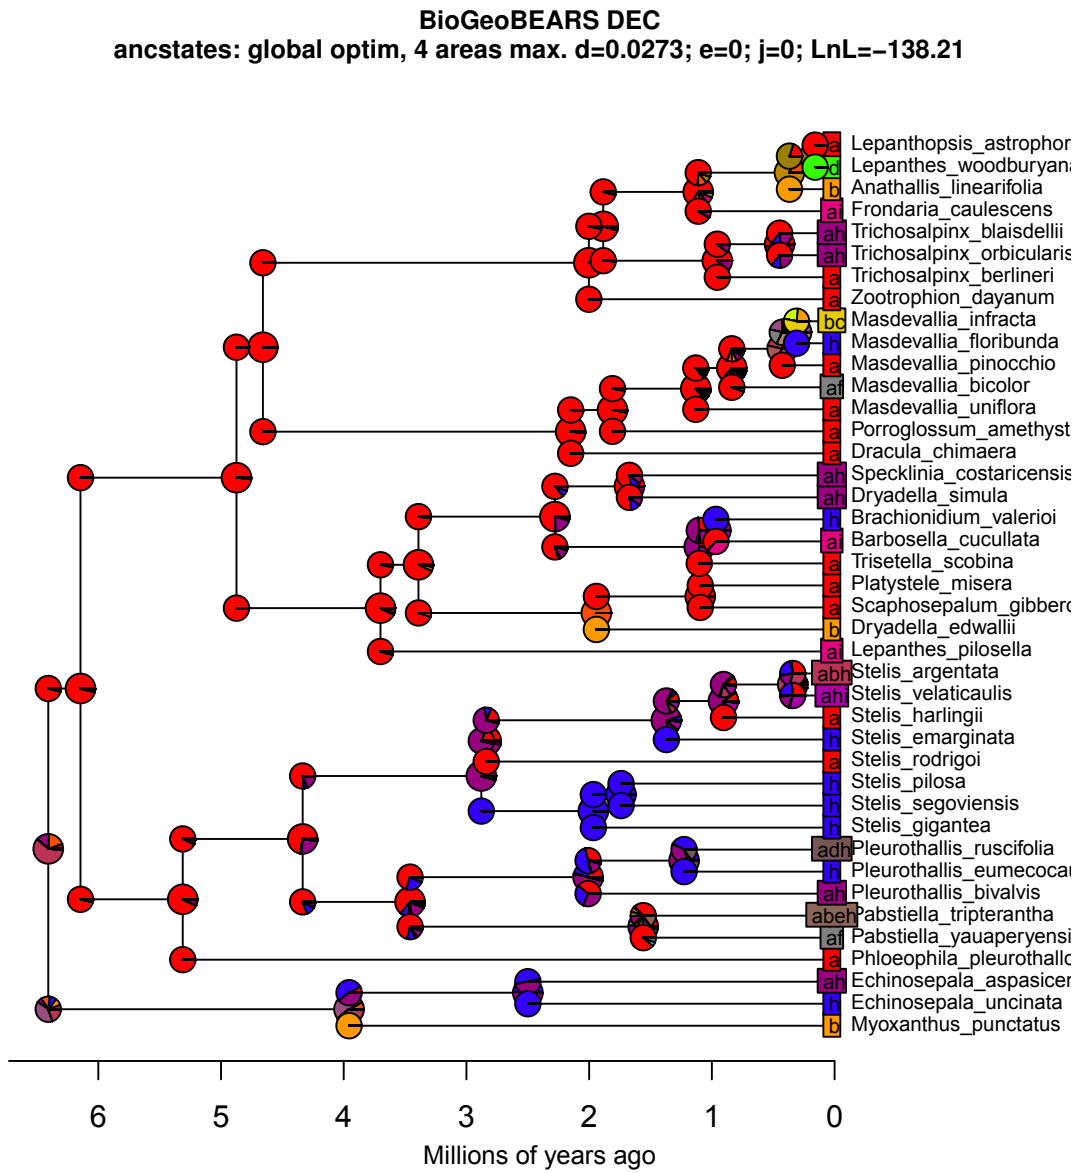

Figure S3: Clades of angiosperms

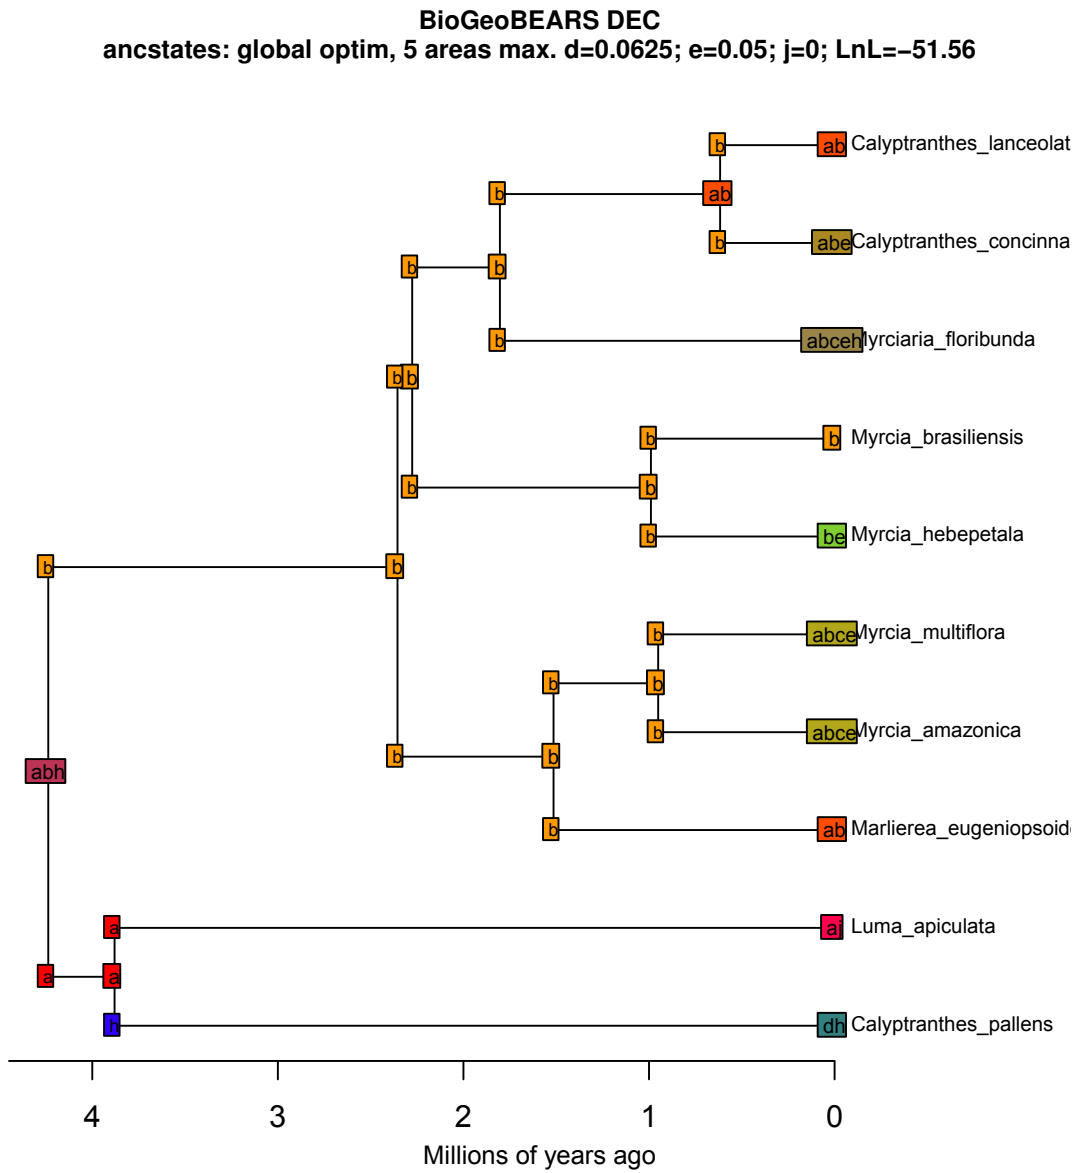



Figure S3: Clades of angiosperms

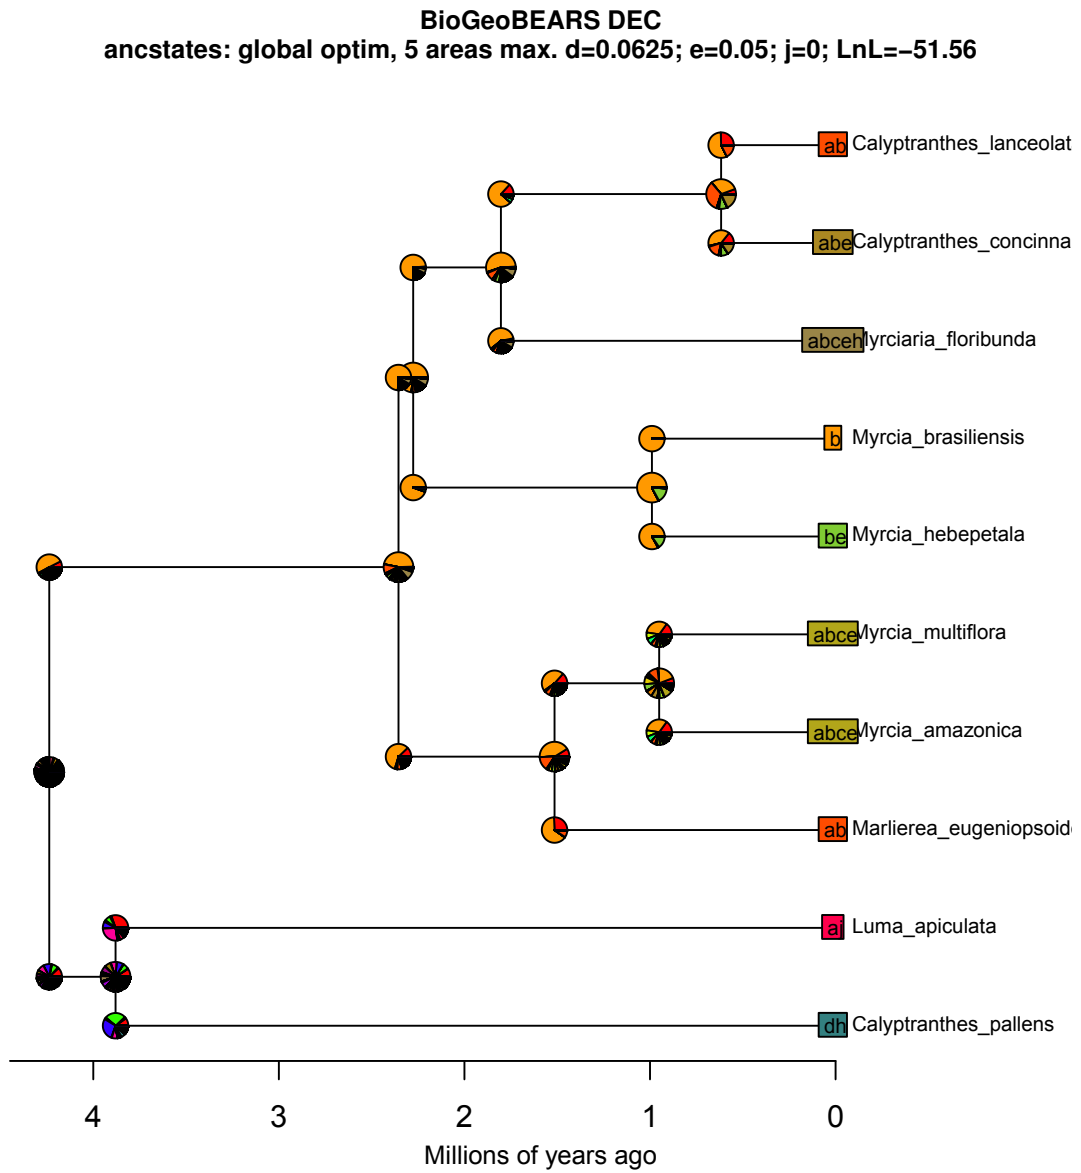

Figure S3: Clades of angiosperms

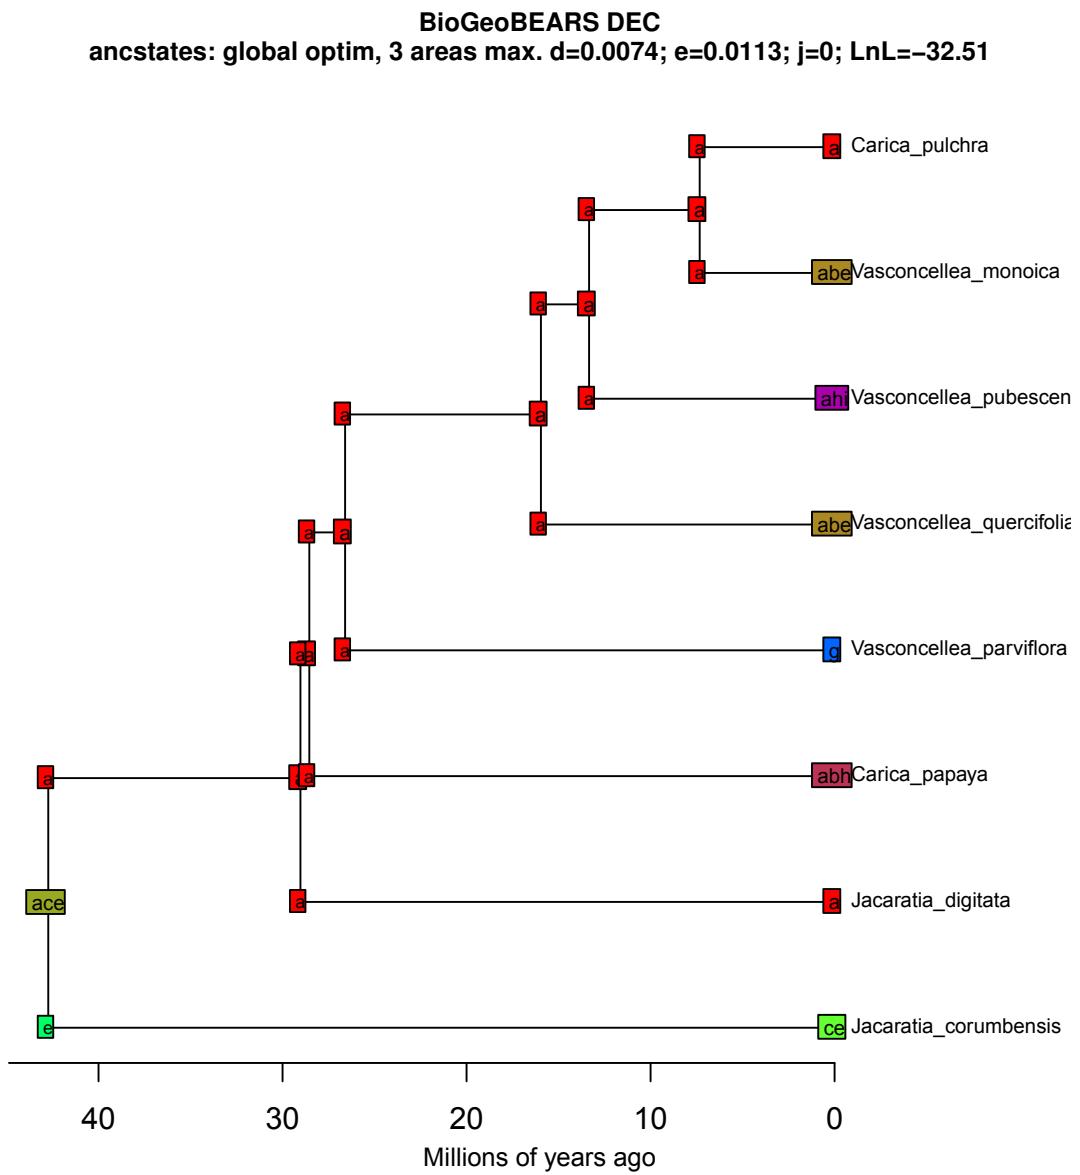

Figure S3: Clades of angiosperms

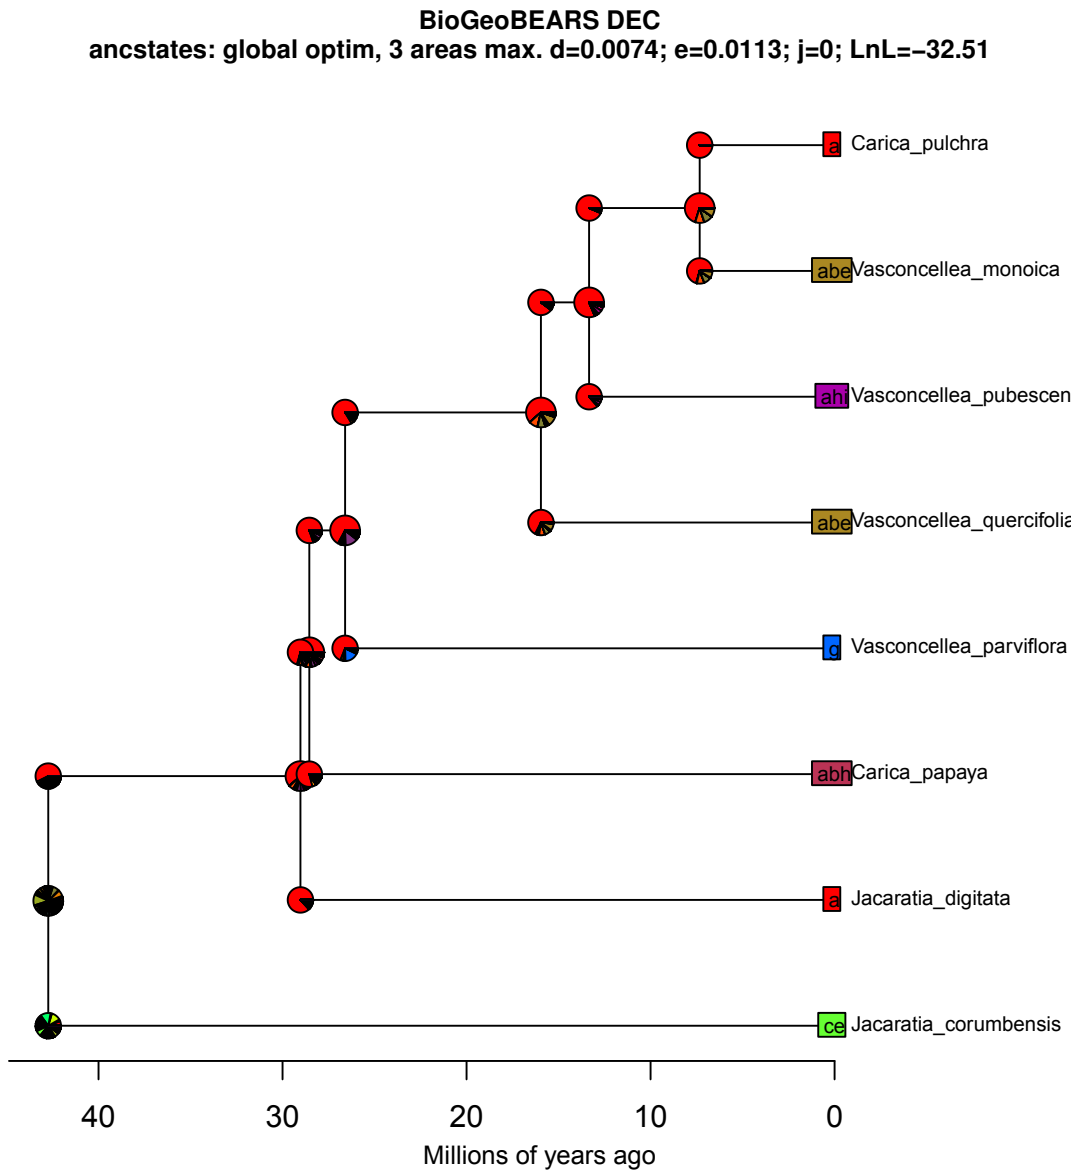

Figure S3: Clades of angiosperms

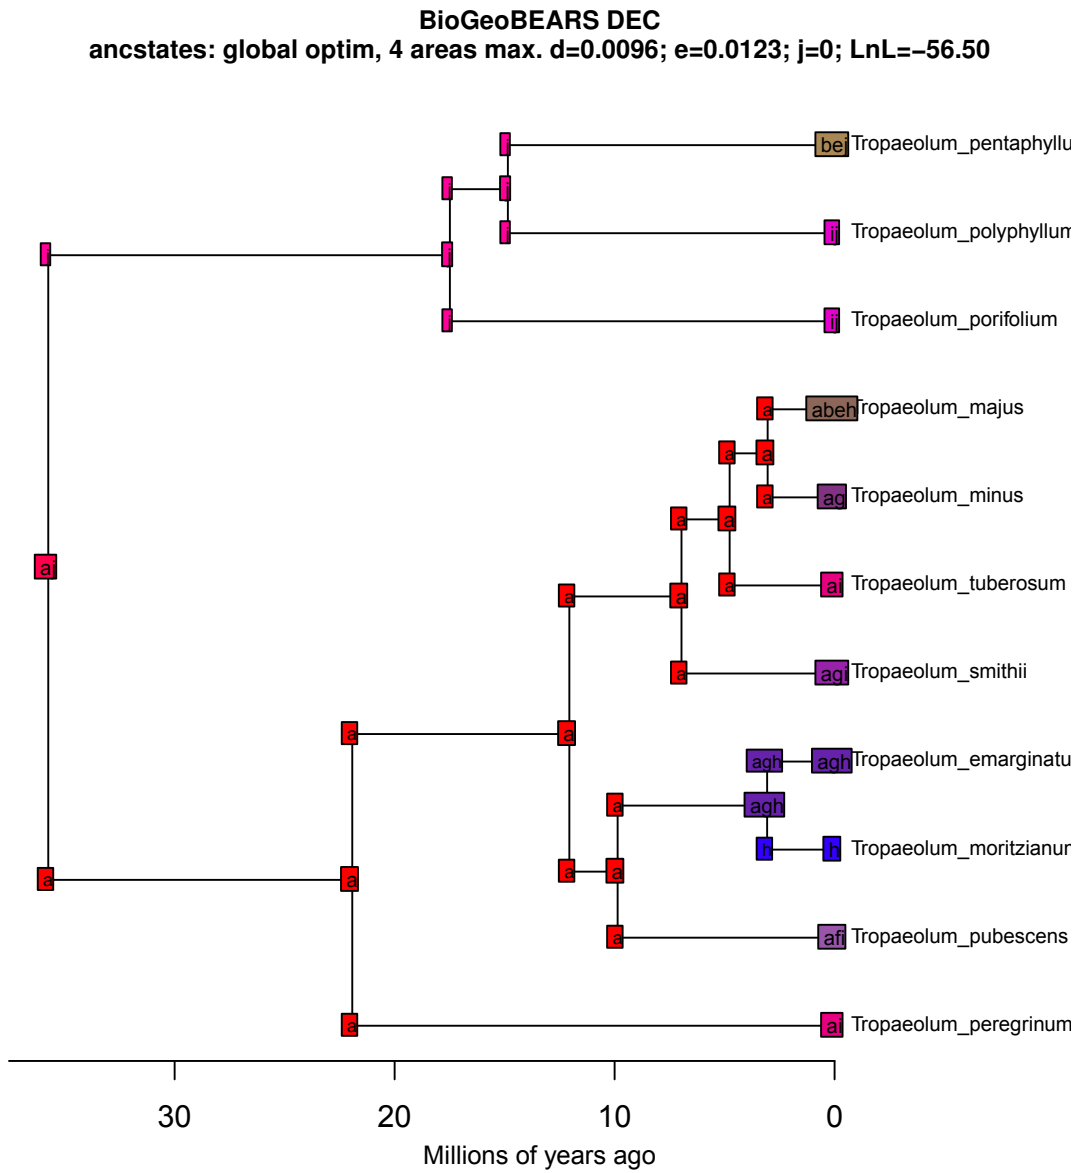

Figure S3: Clades of angiosperms

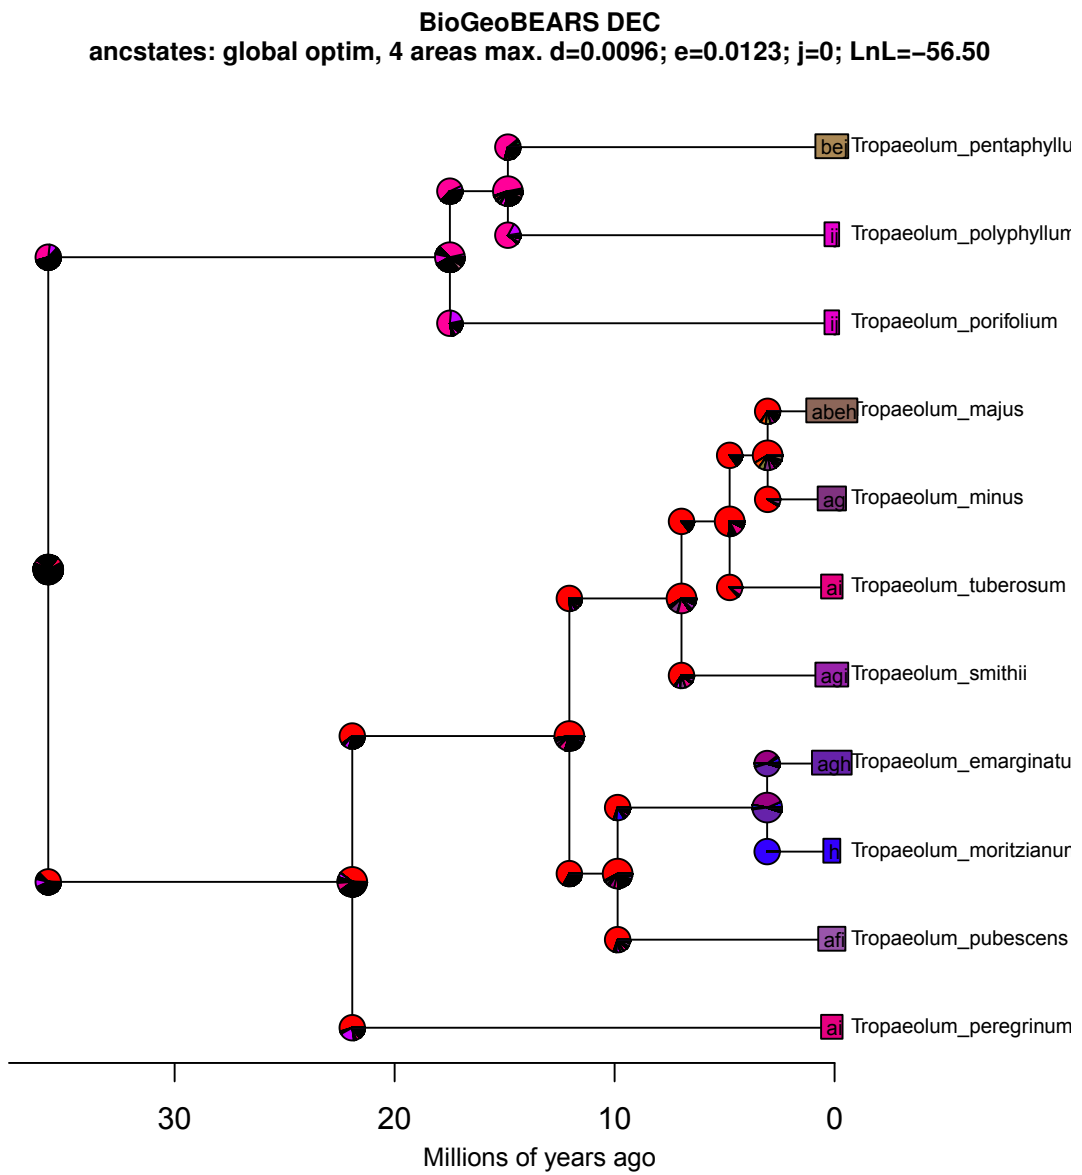

Figure S3: Clades of angiosperms

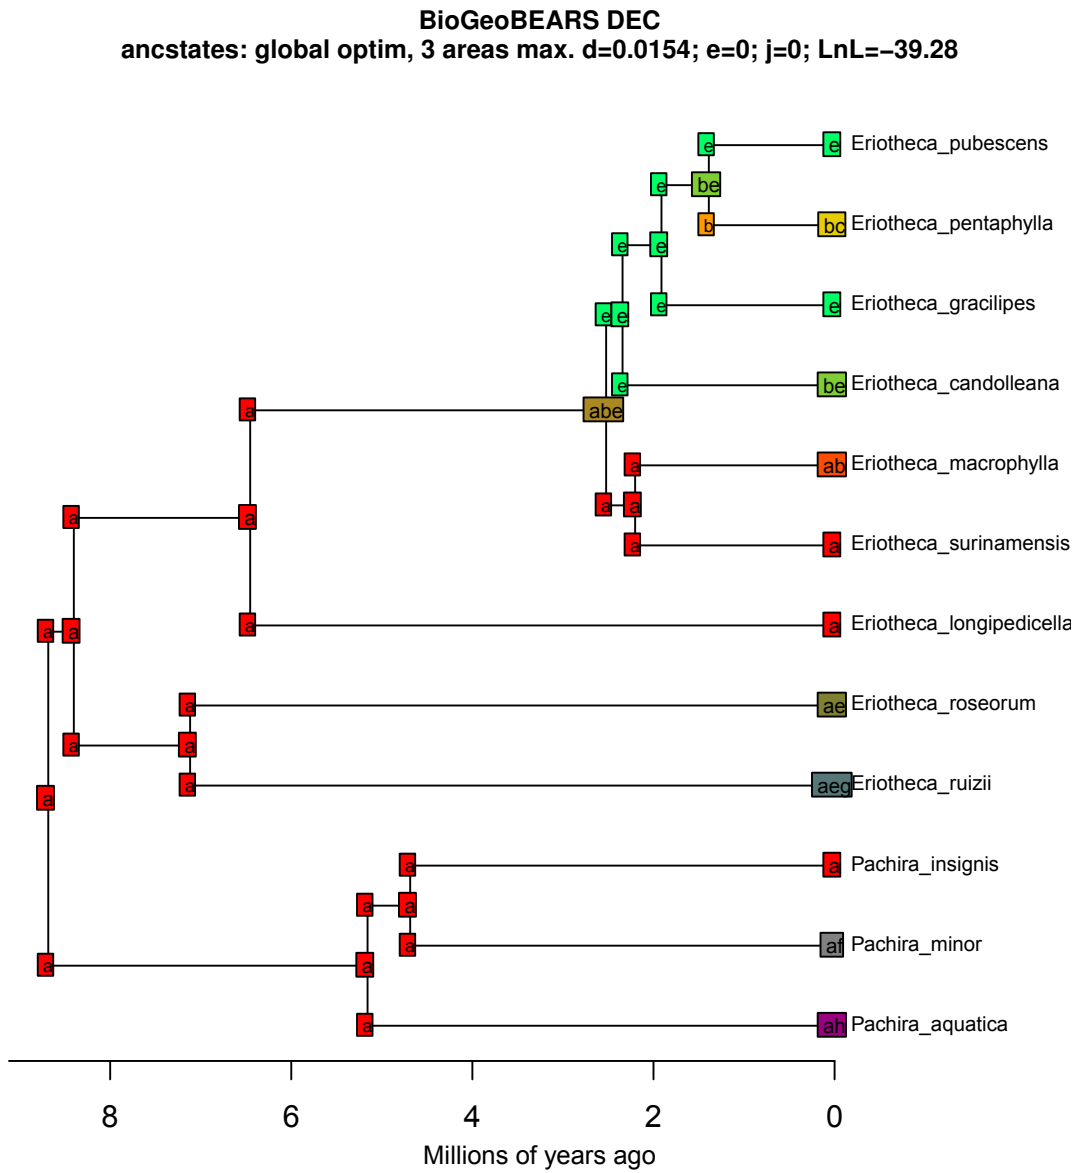

Figure S3: Clades of angiosperms

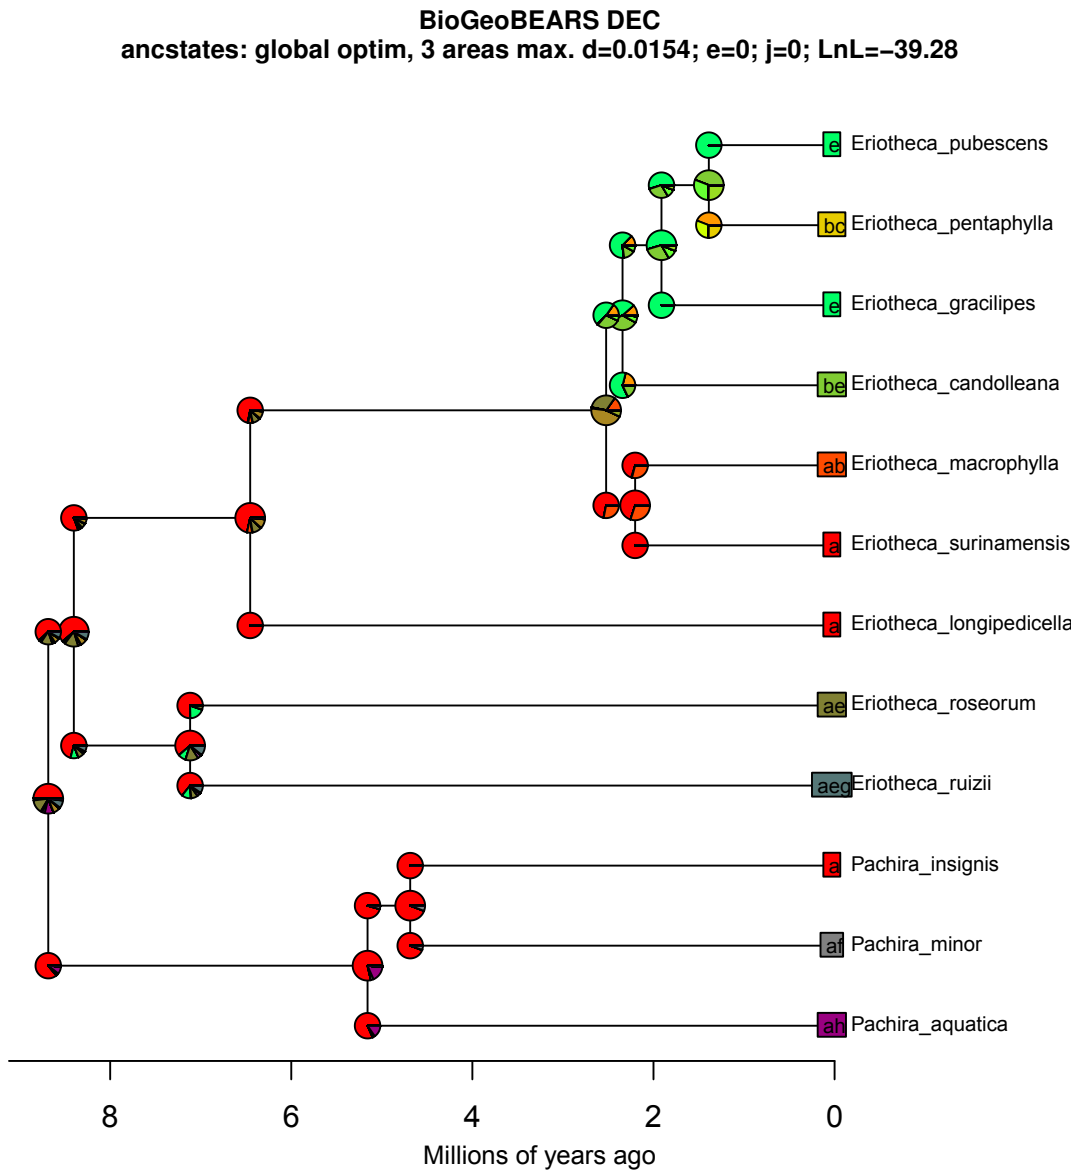

Figure S3: Clades of angiosperms

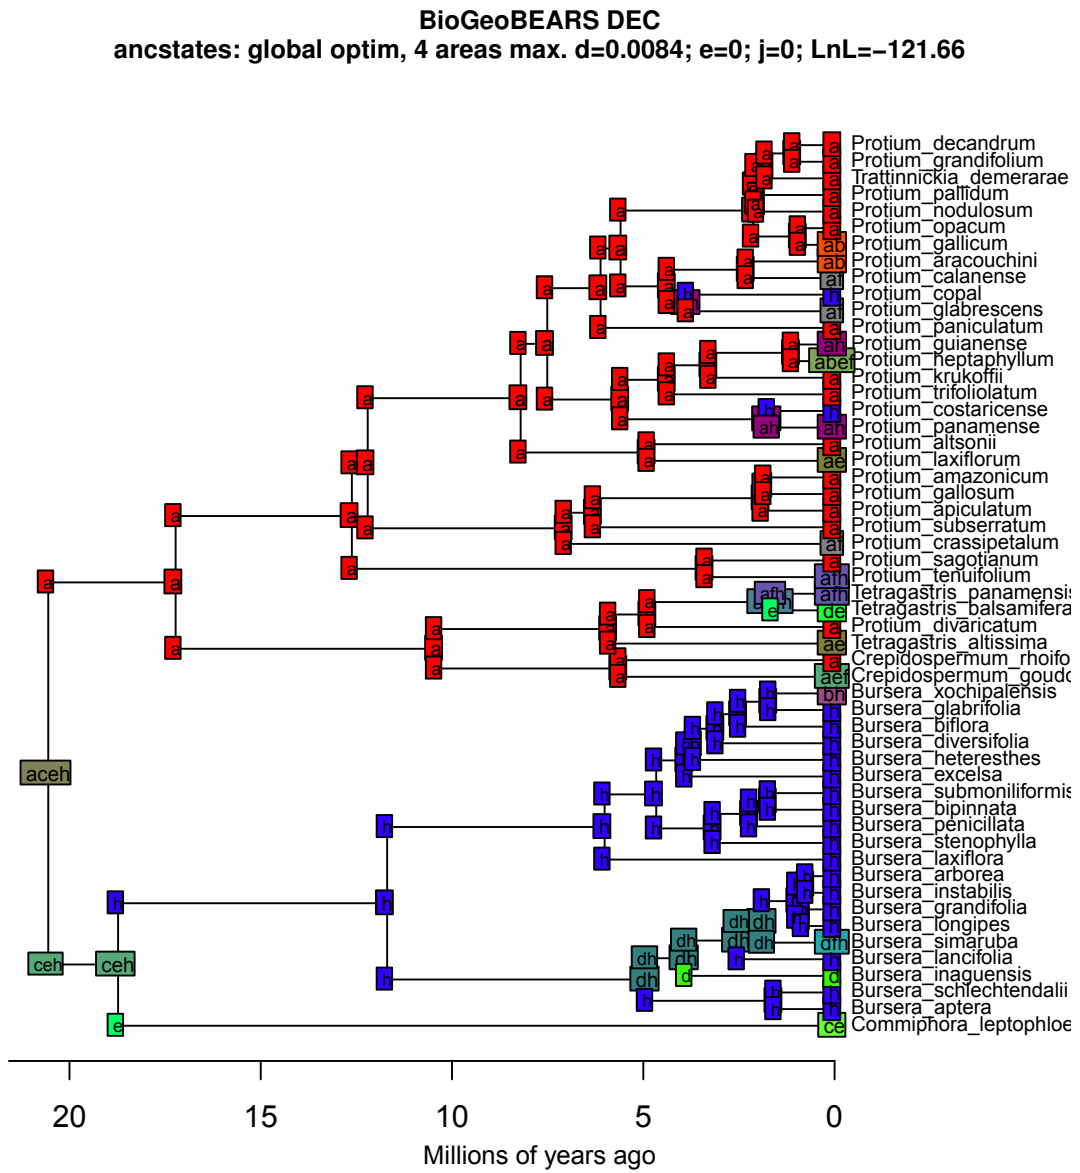



Figure S3: Clades of angiosperms

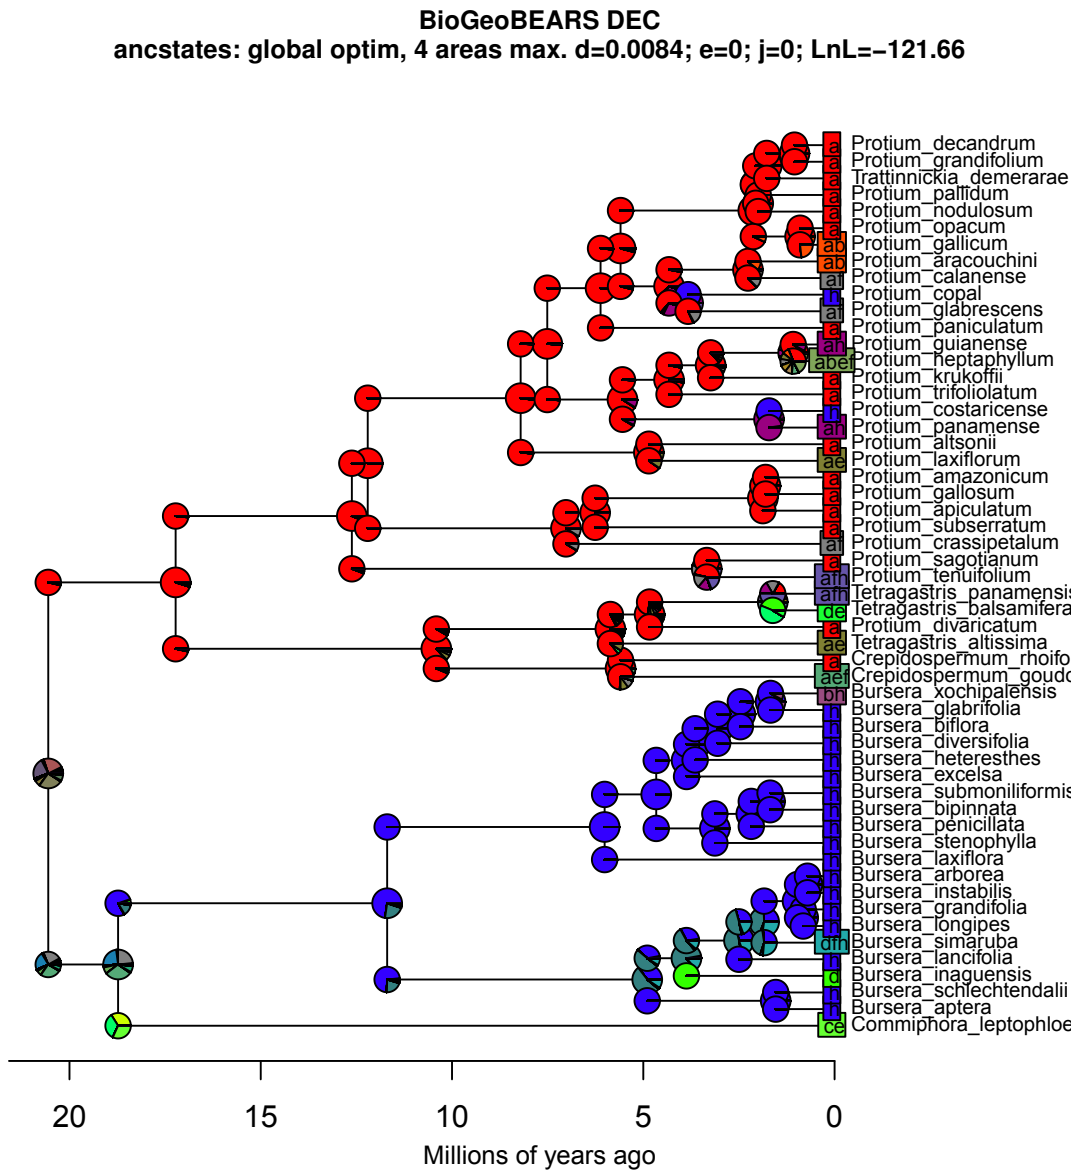

Figure S3: Clades of angiosperms

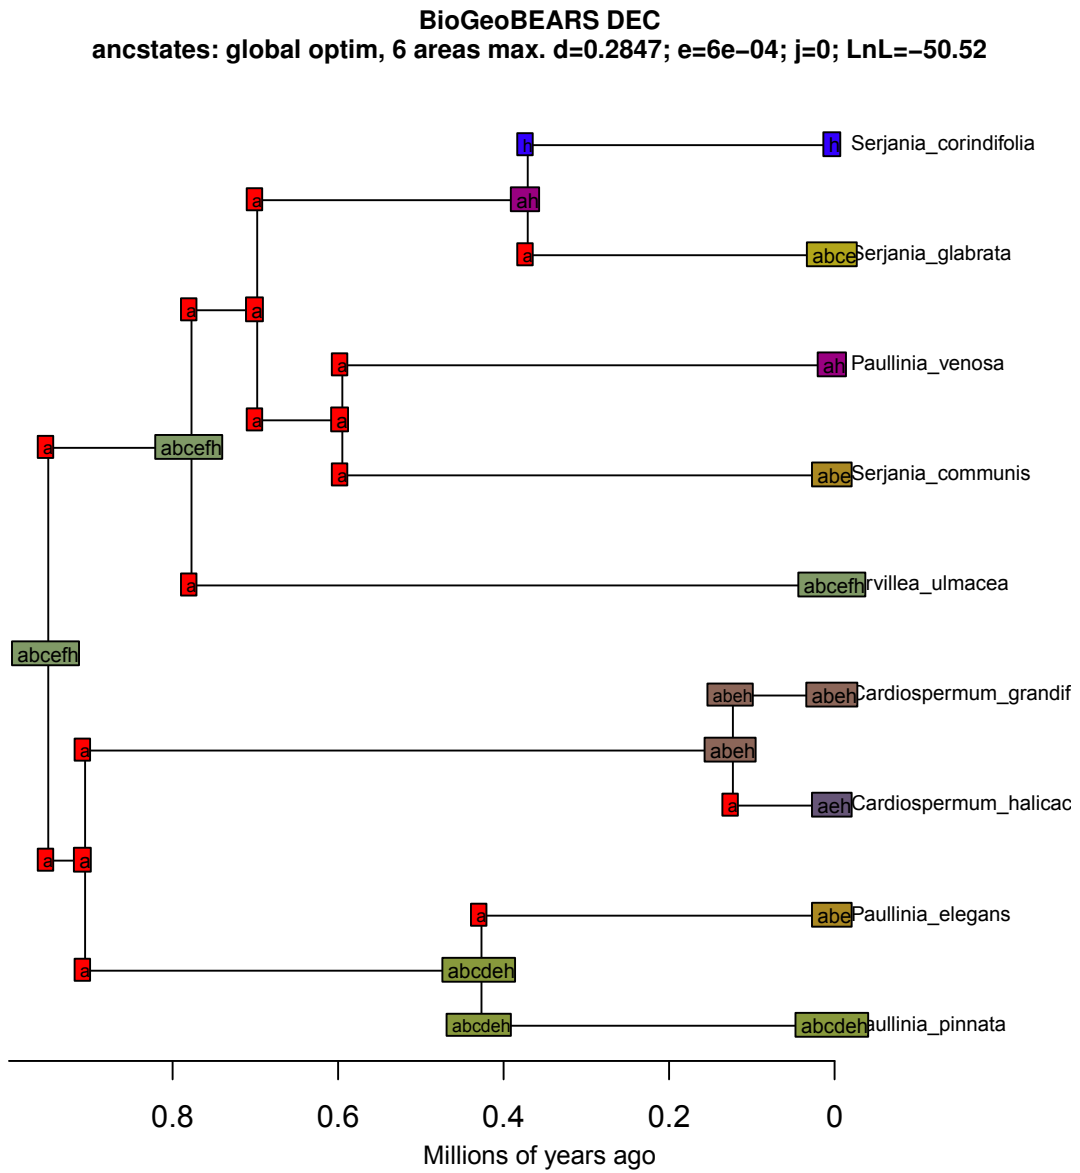

Figure S3: Clades of angiosperms

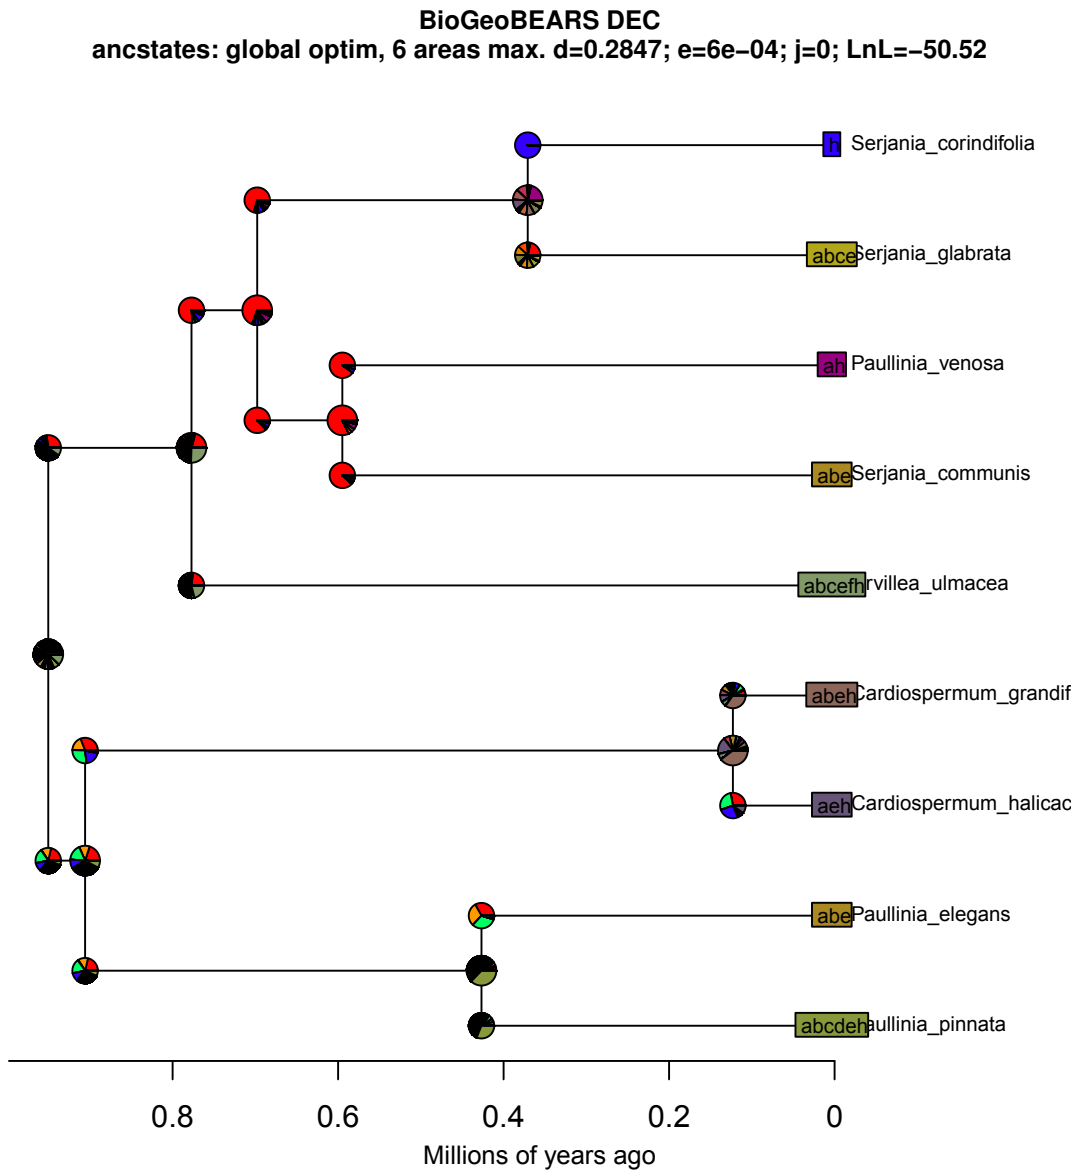

Figure S3: Clades of angiosperms

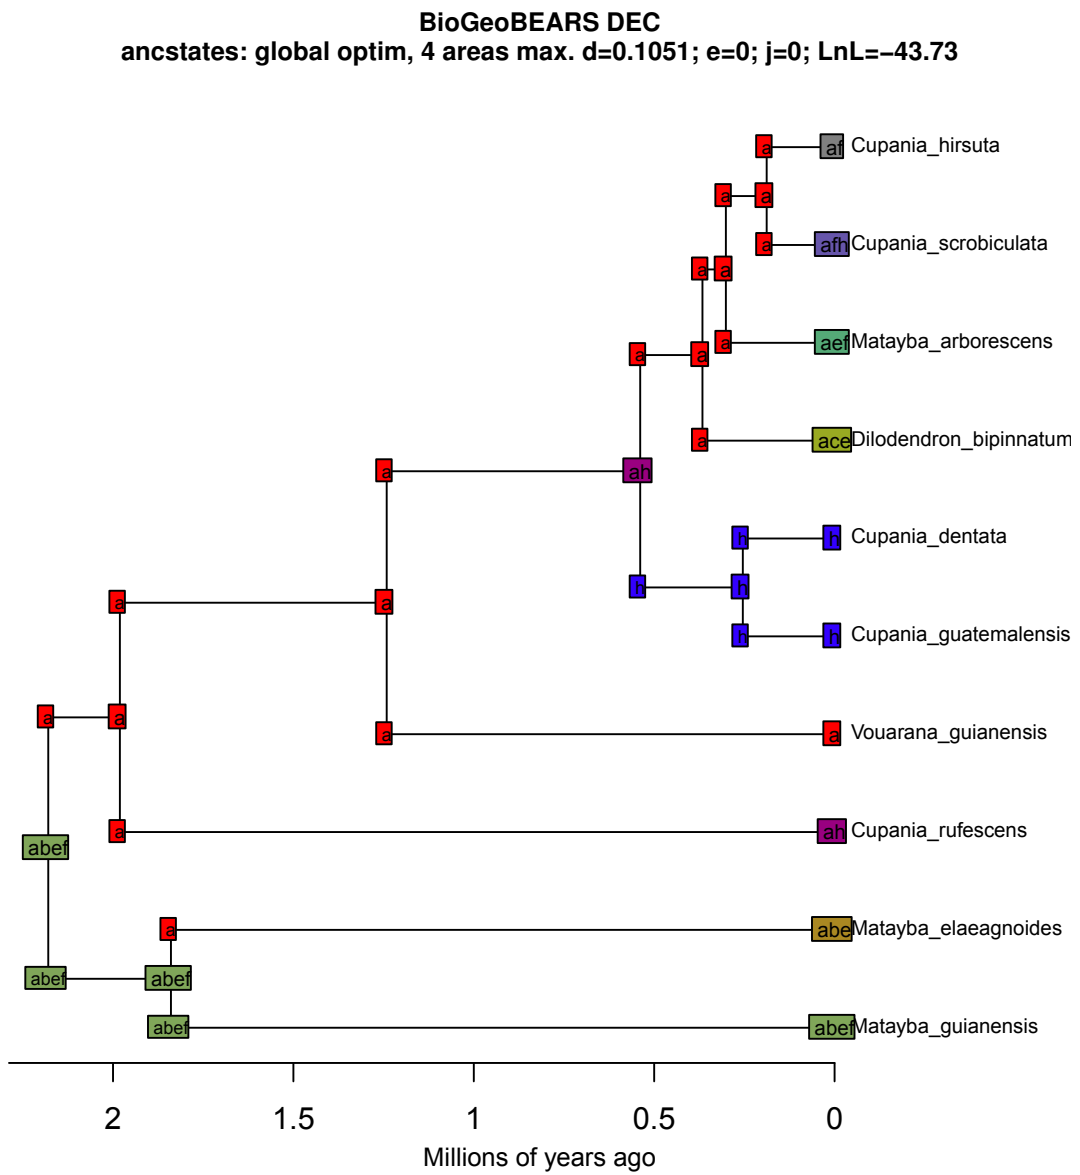

Figure S3: Clades of angiosperms

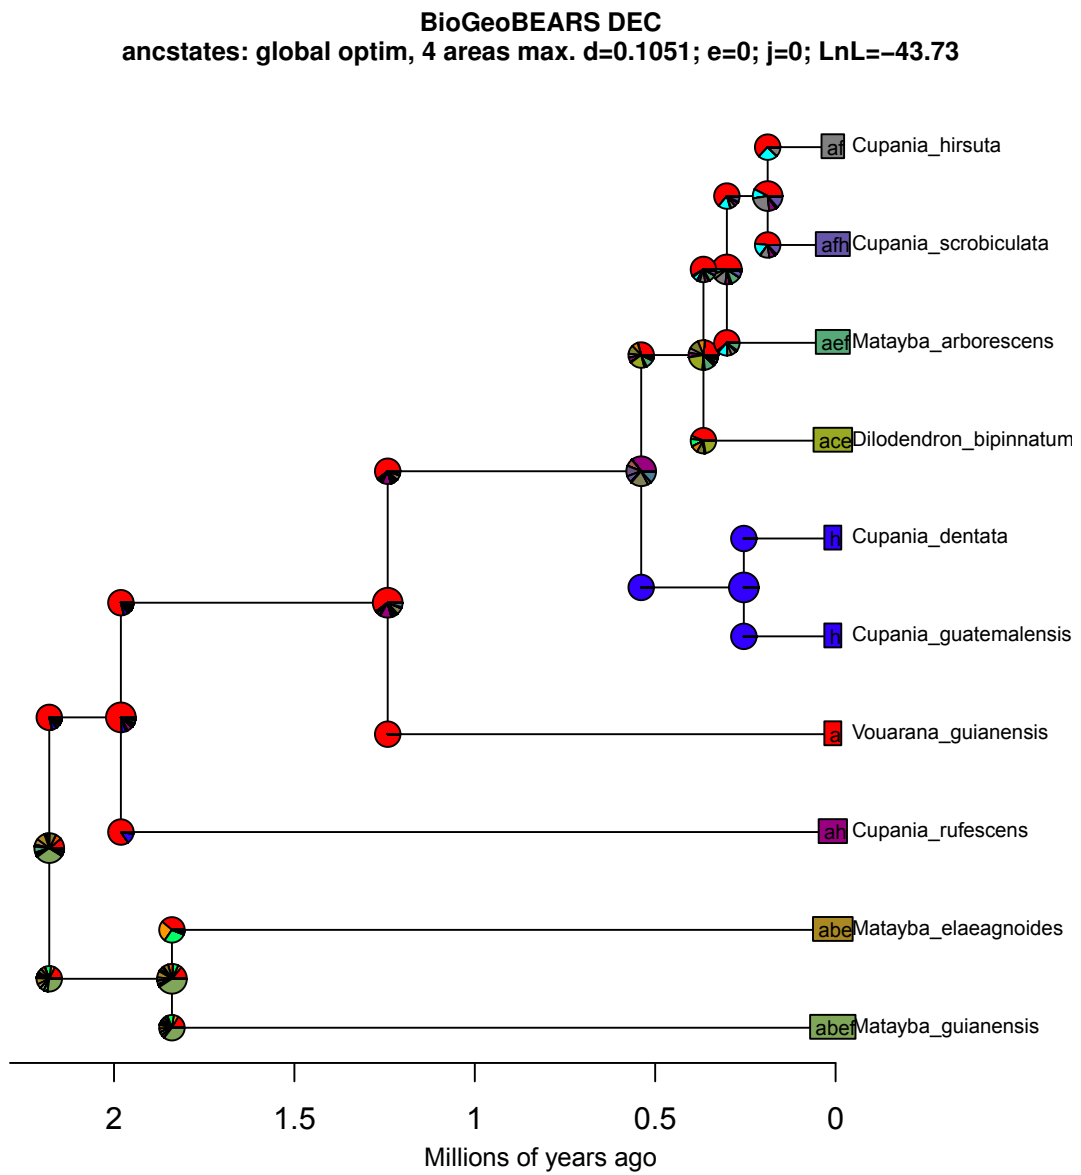

Figure S3: Clades of angiosperms

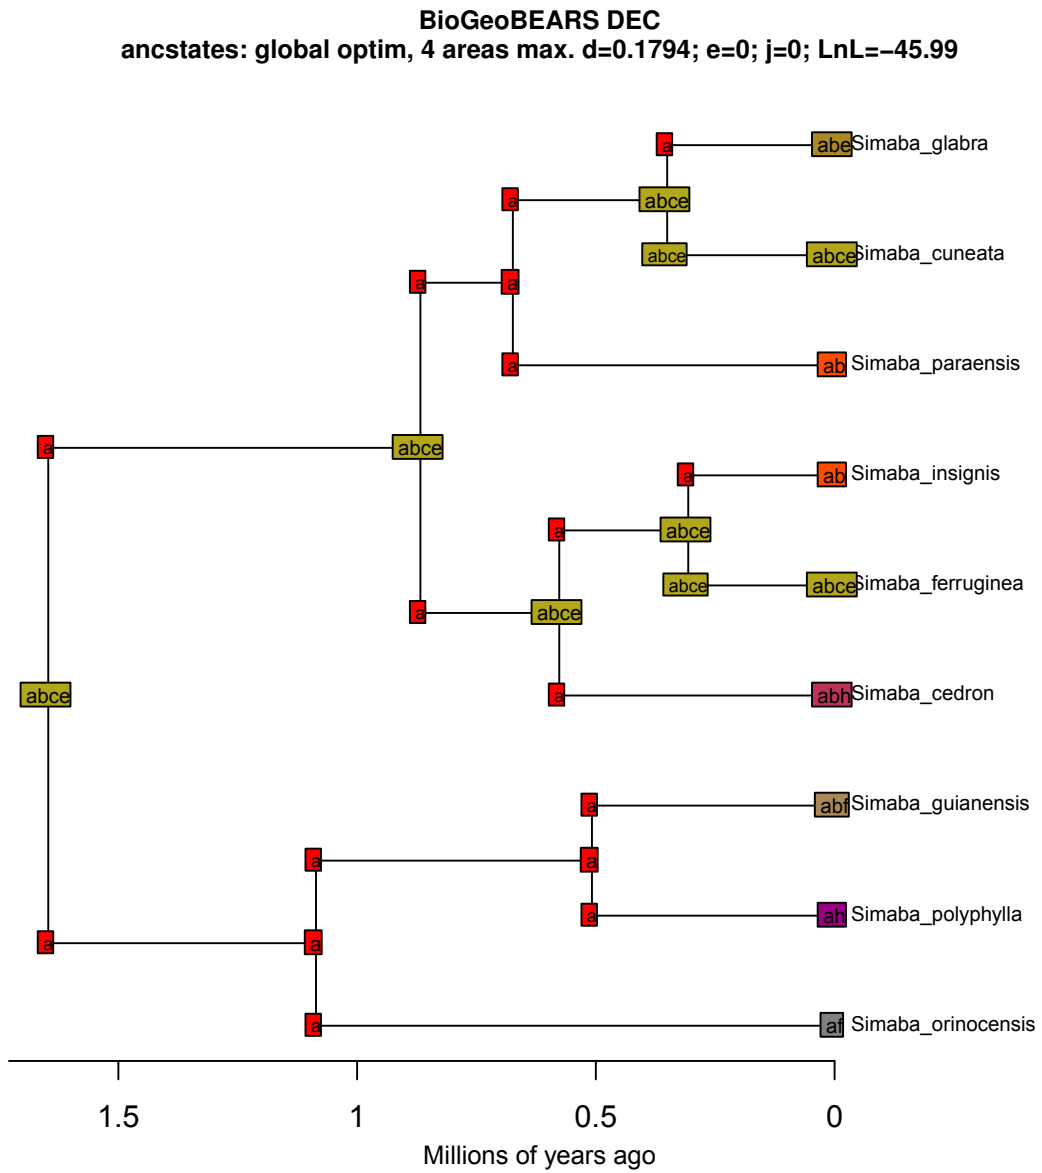

Figure S3: Clades of angiosperms

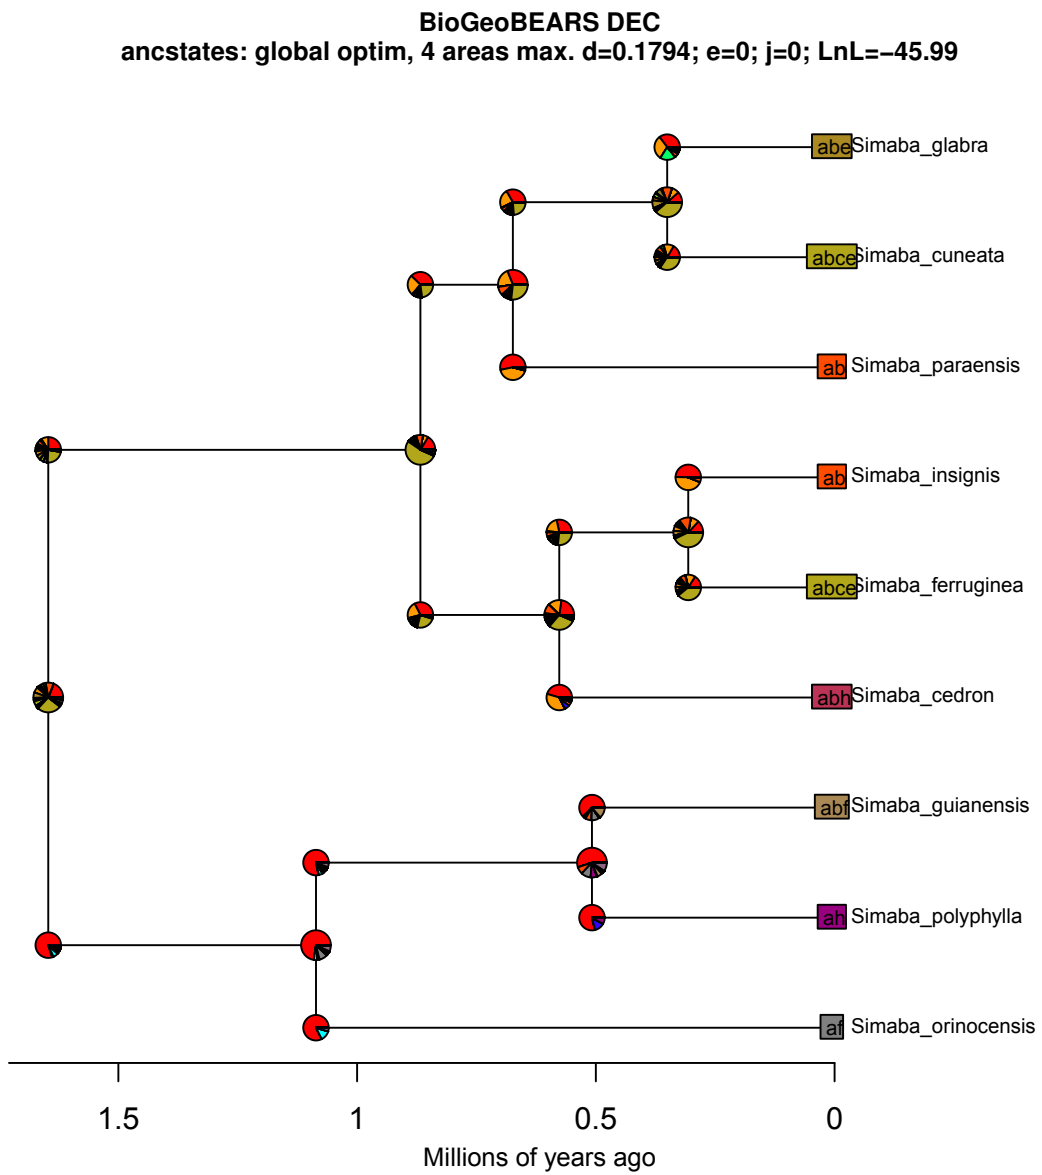

Figure S3: Clades of angiosperms

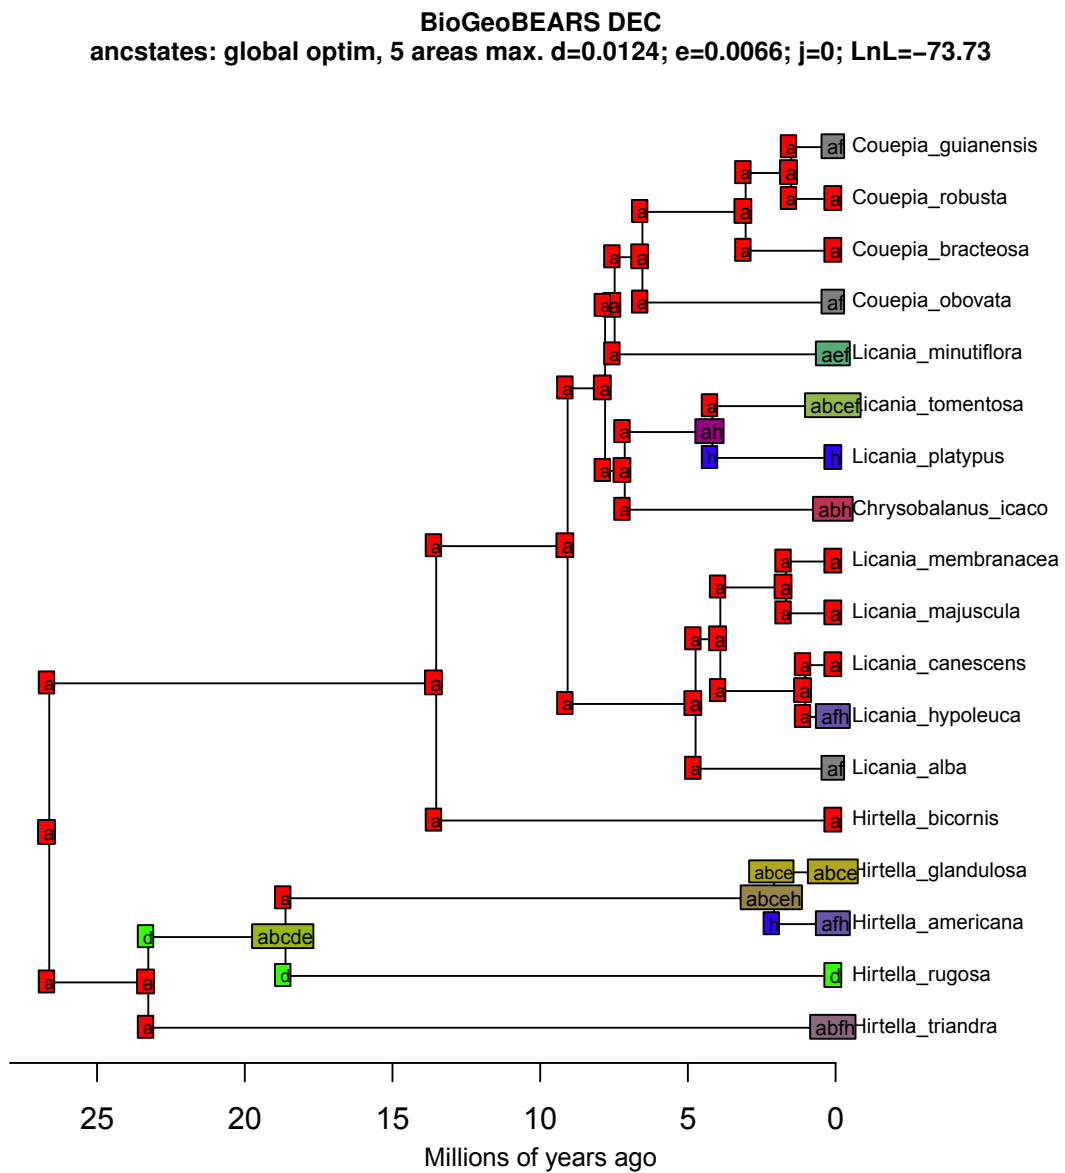



Figure S3: Clades of angiosperms

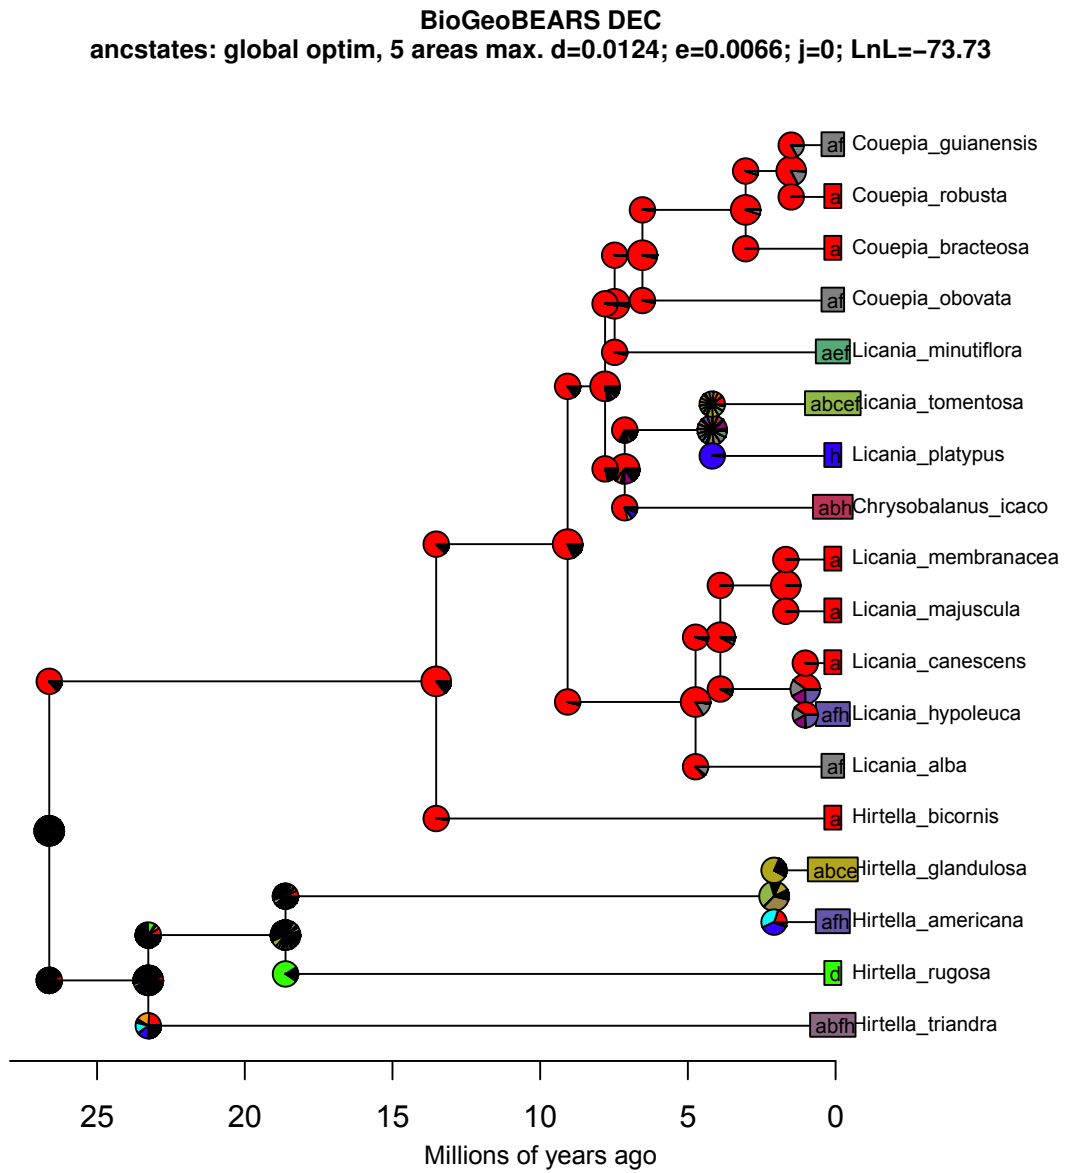

Figure S3: Clades of angiosperms

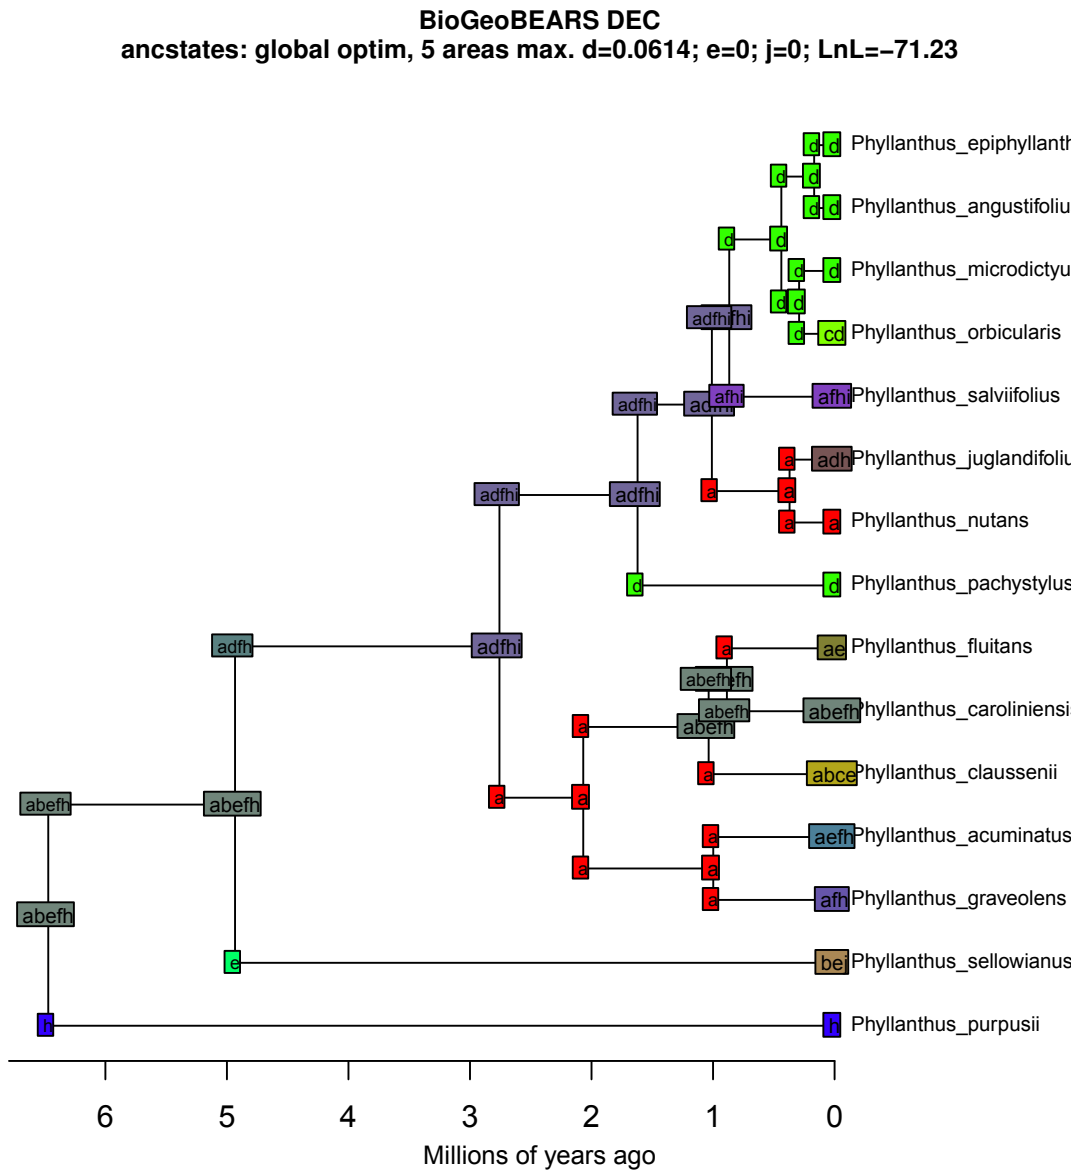

Figure S3: Clades of angiosperms

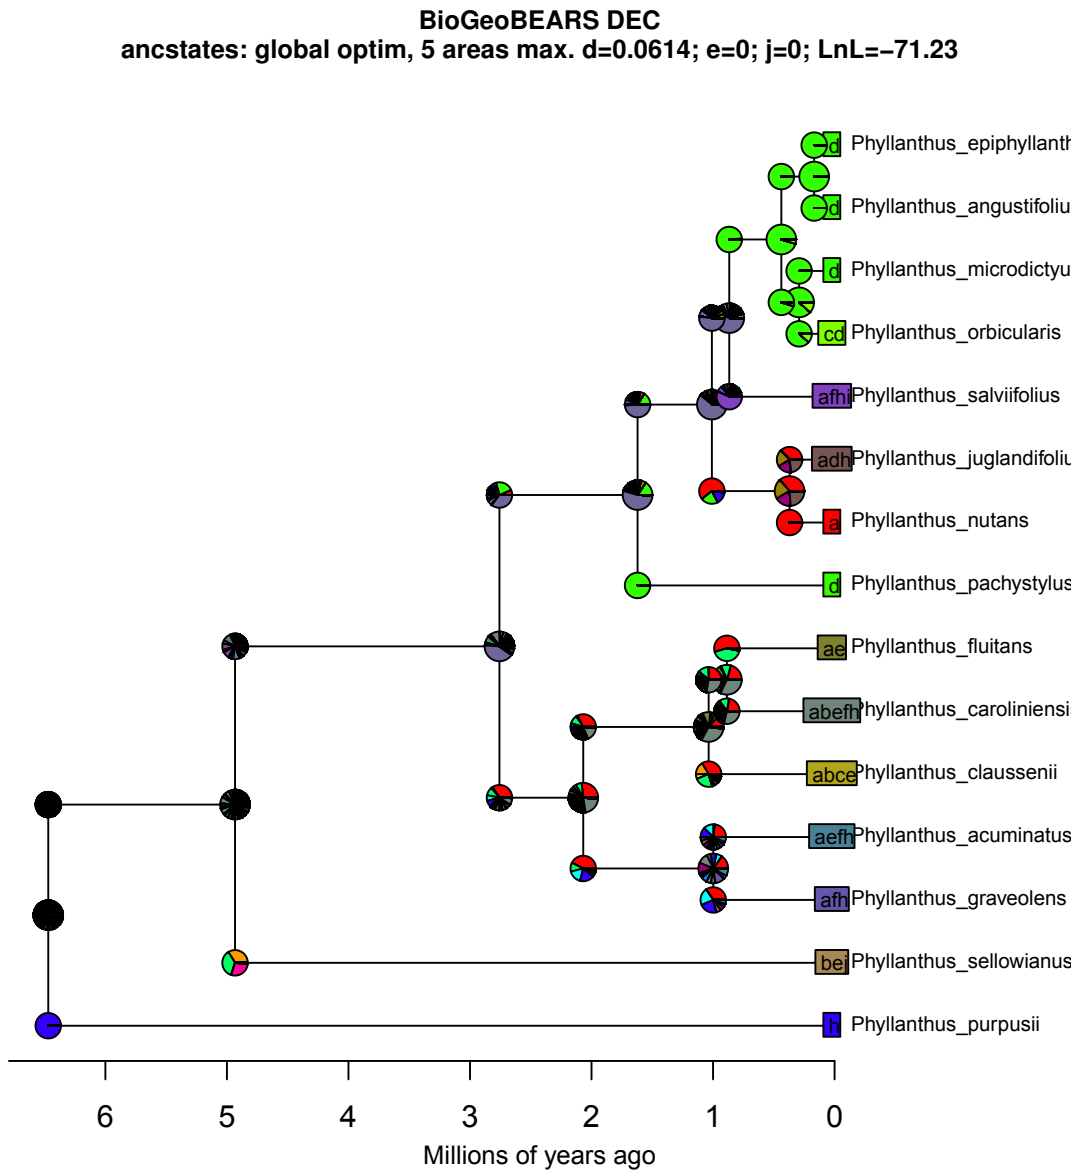

Figure S3: Clades of angiosperms

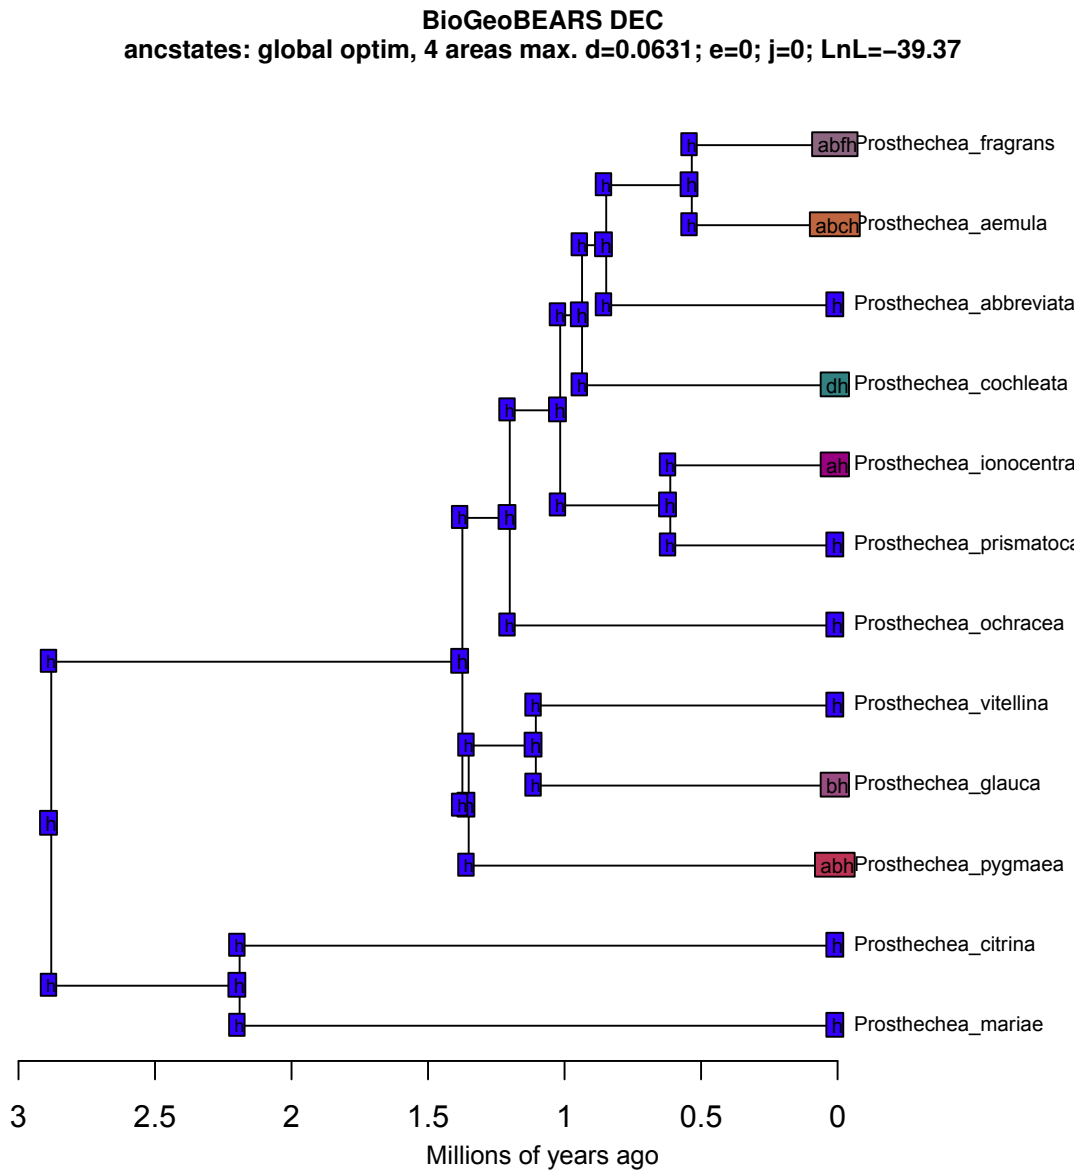

Figure S3: Clades of angiosperms

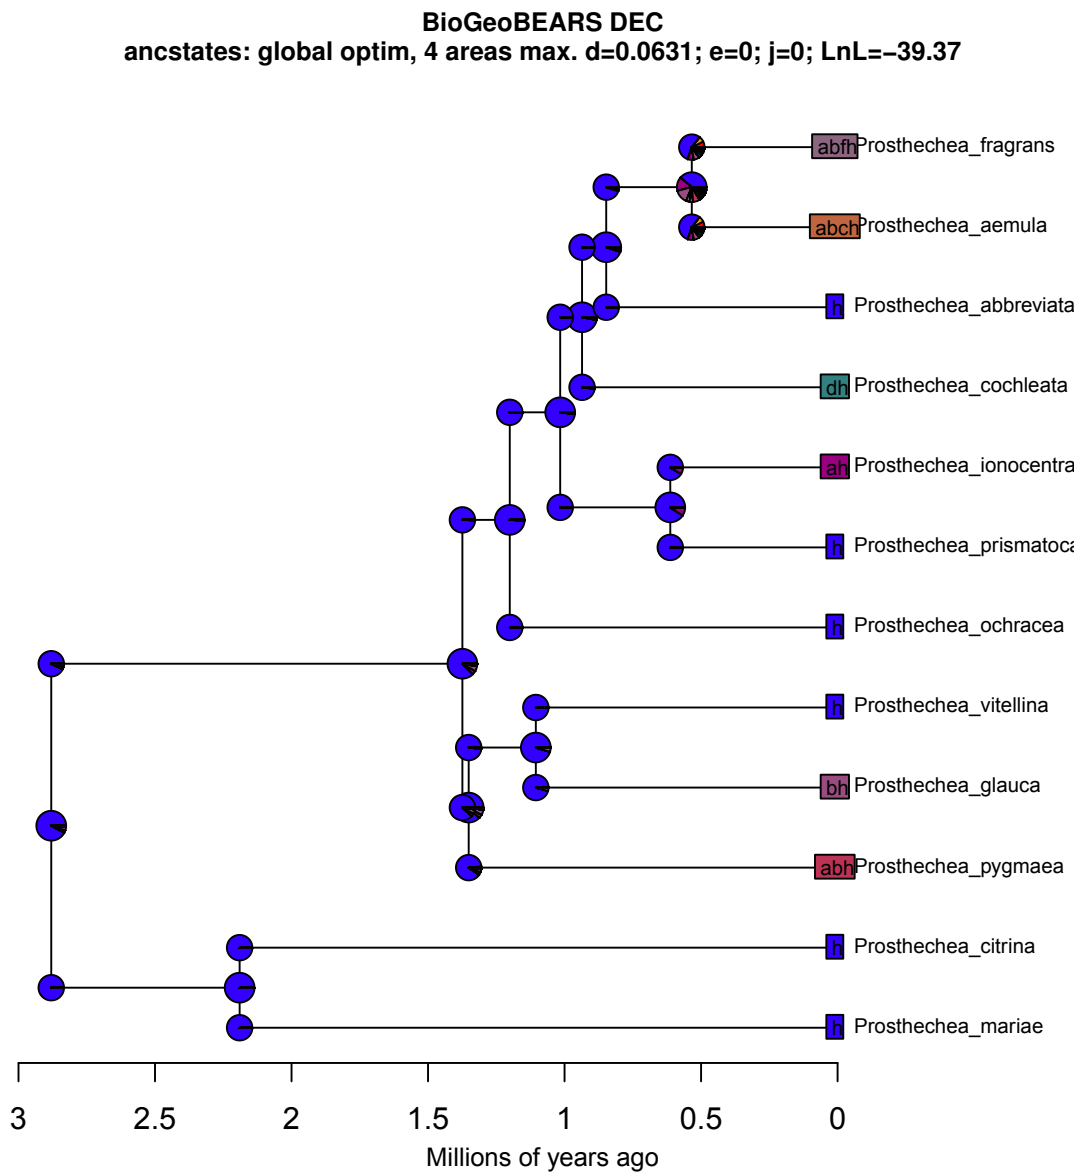

Figure S3: Clades of angiosperms

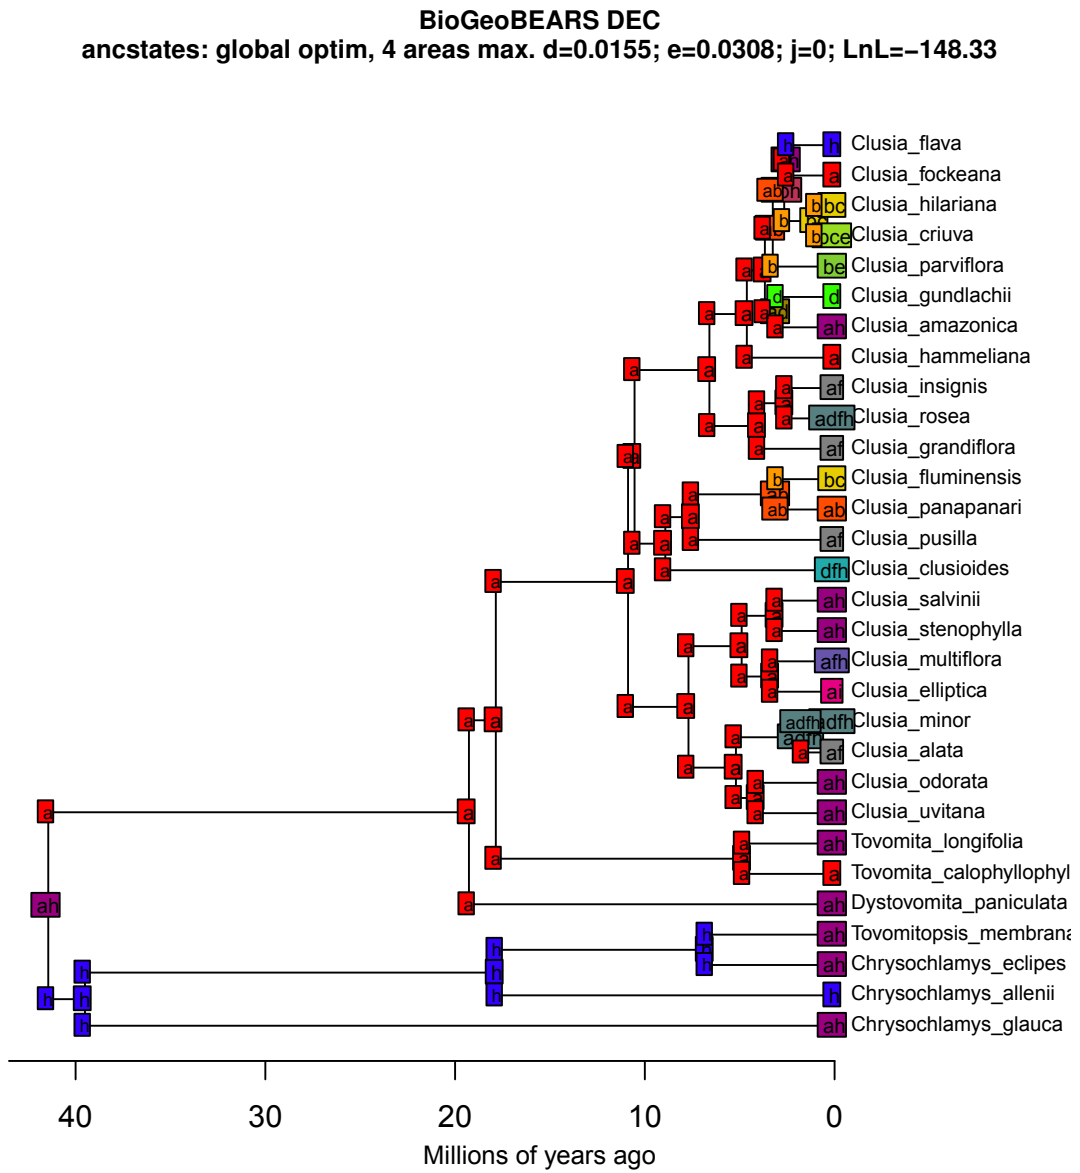

Figure S3: Clades of angiosperms

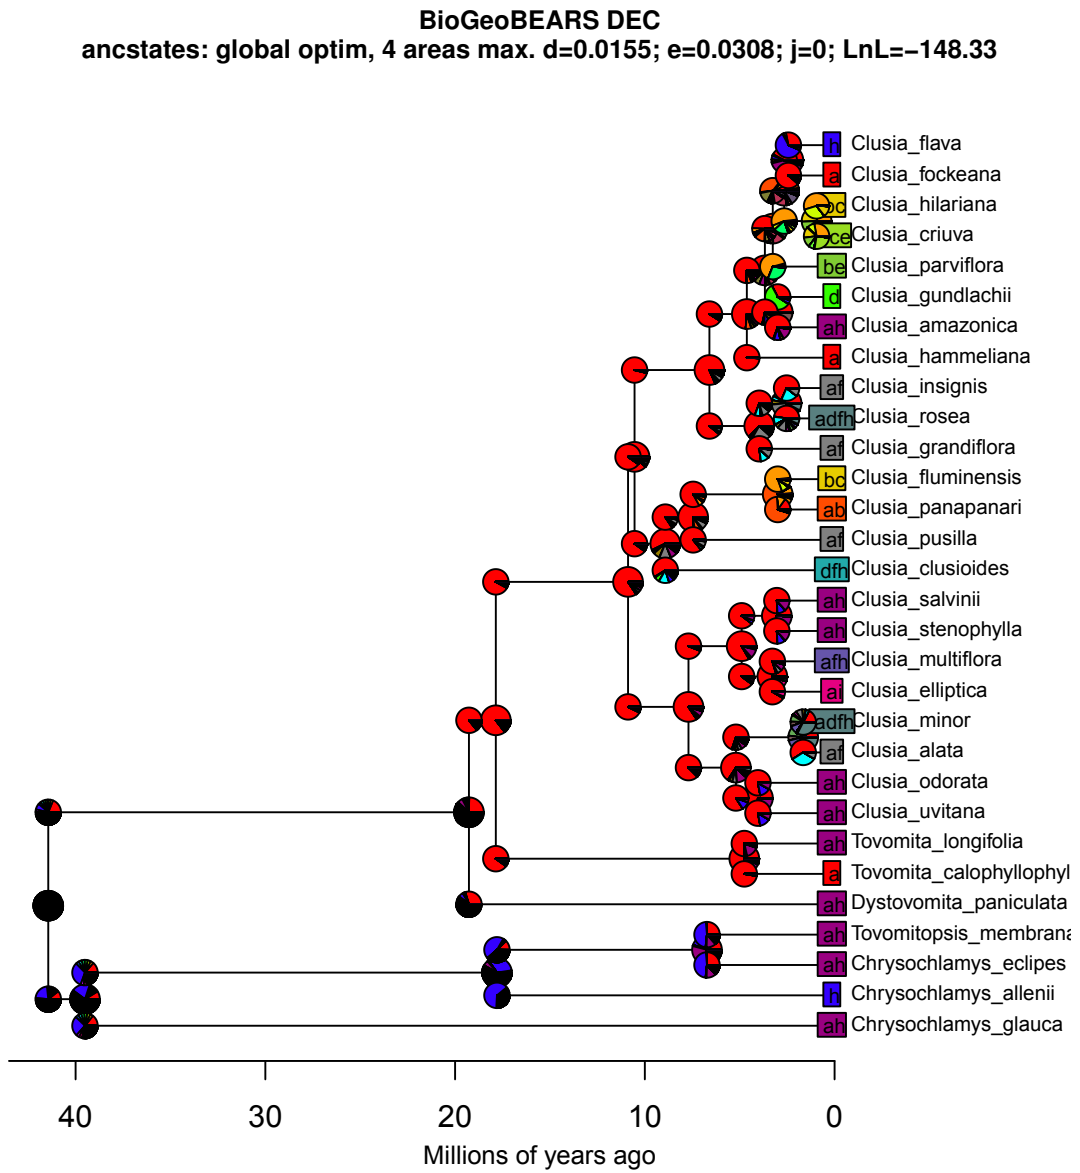

Figure S3: Clades of angiosperms

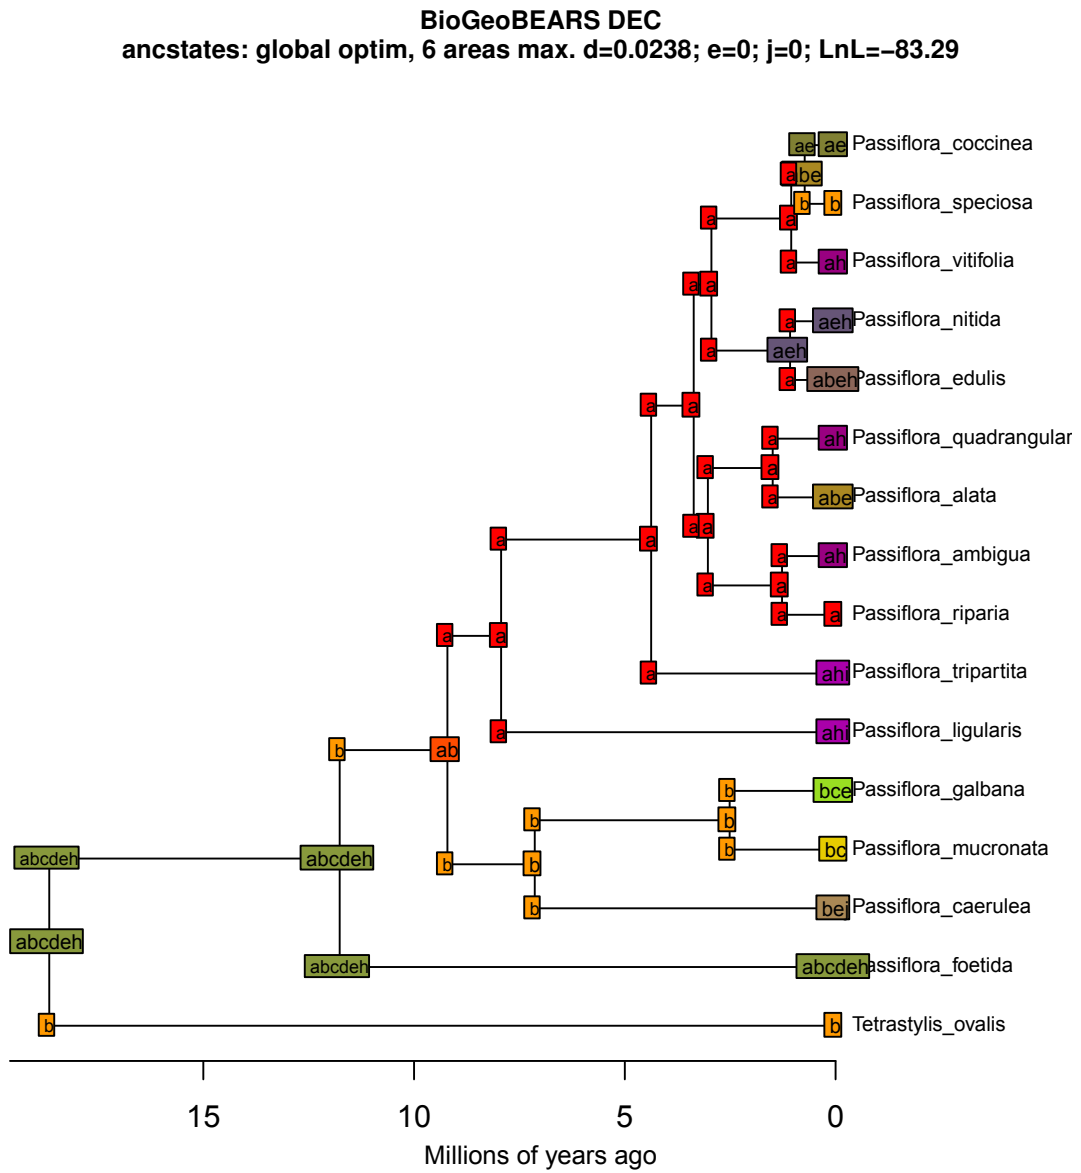



Figure S3: Clades of angiosperms

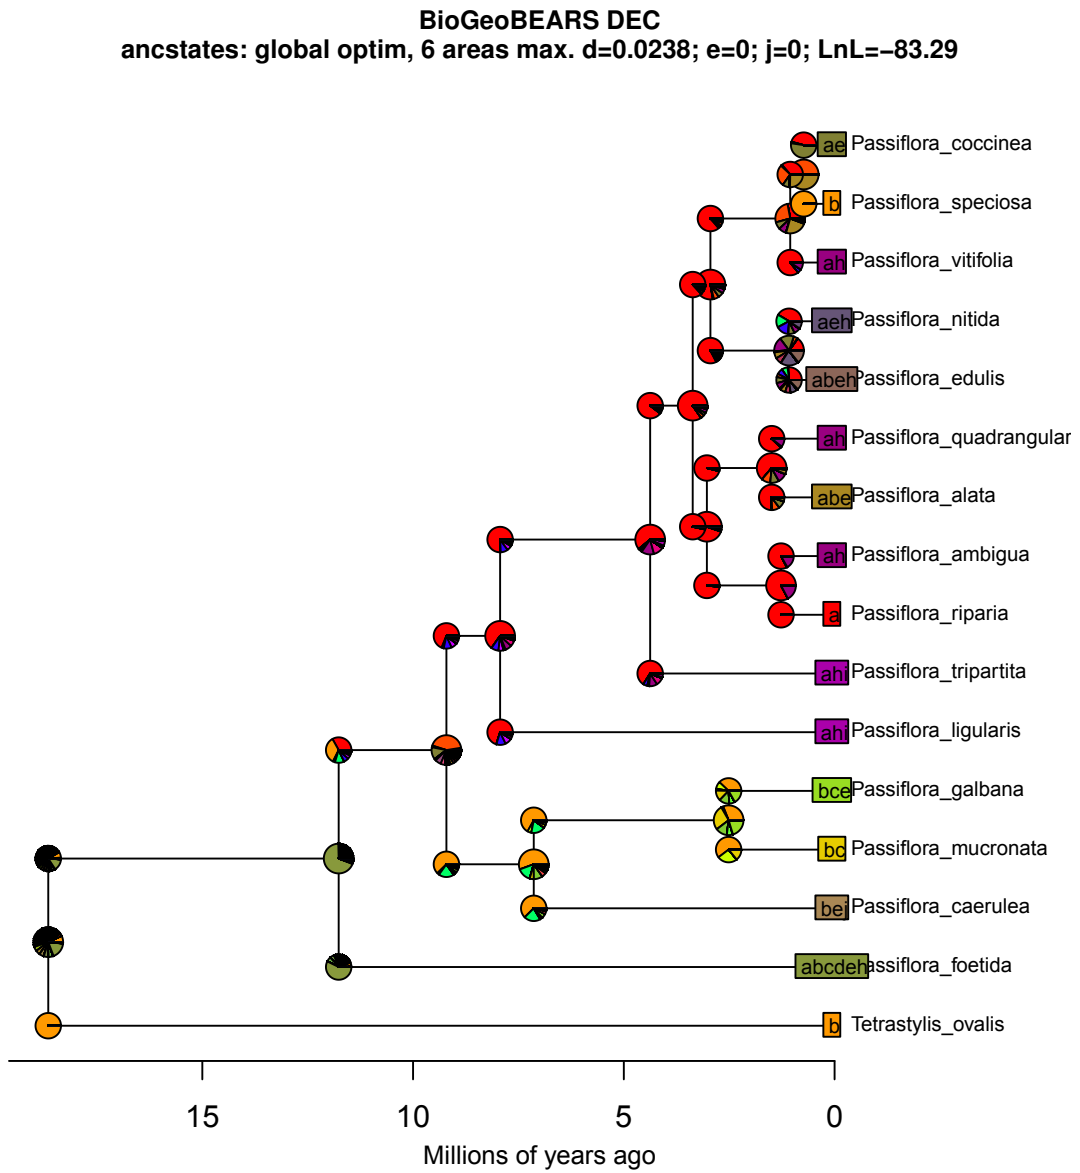

Figure S3: Clades of angiosperms

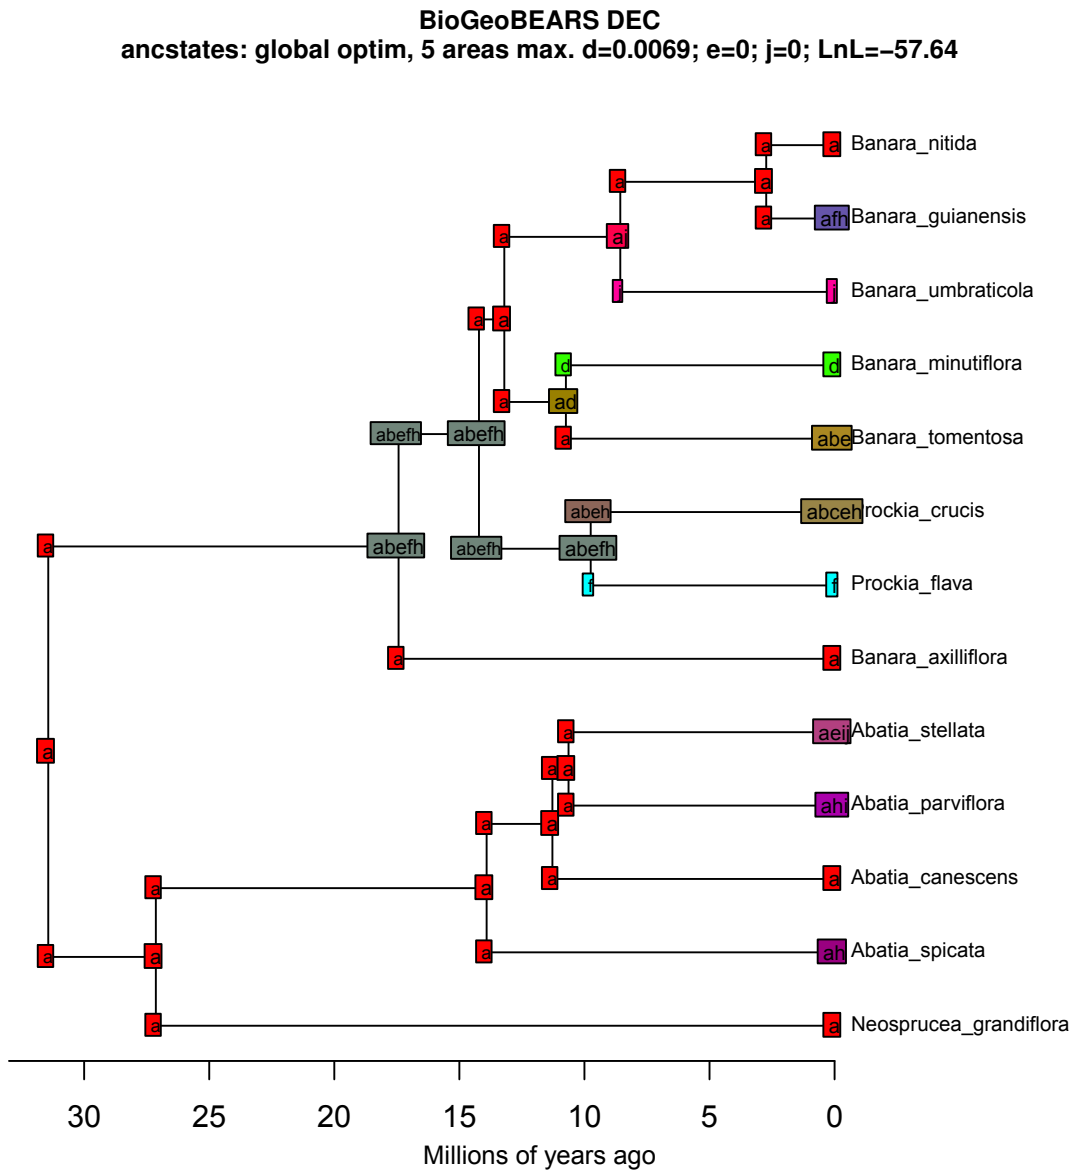

Figure S3: Clades of angiosperms

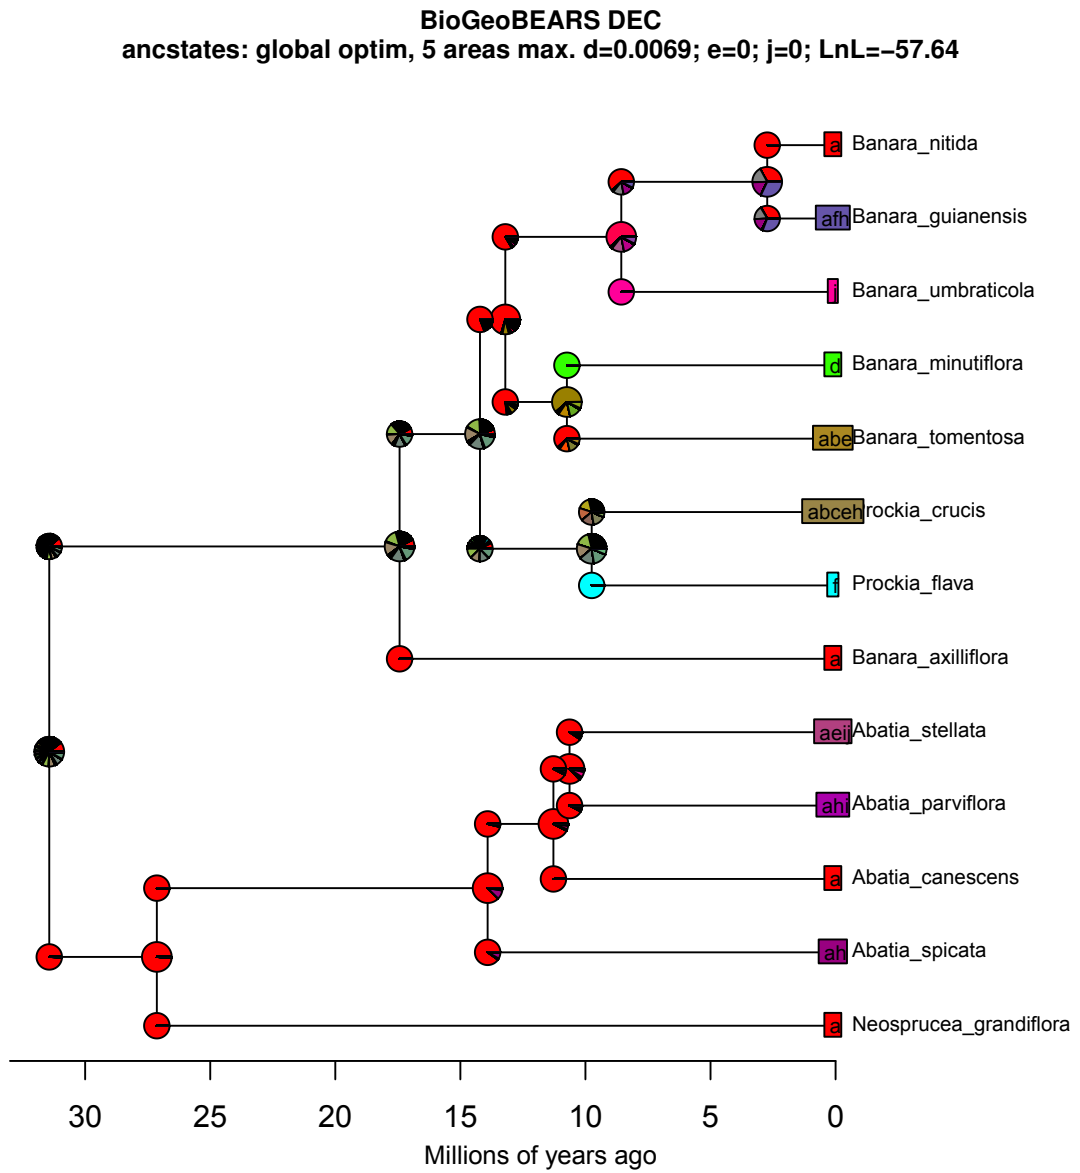

Figure S3: Clades of angiosperms

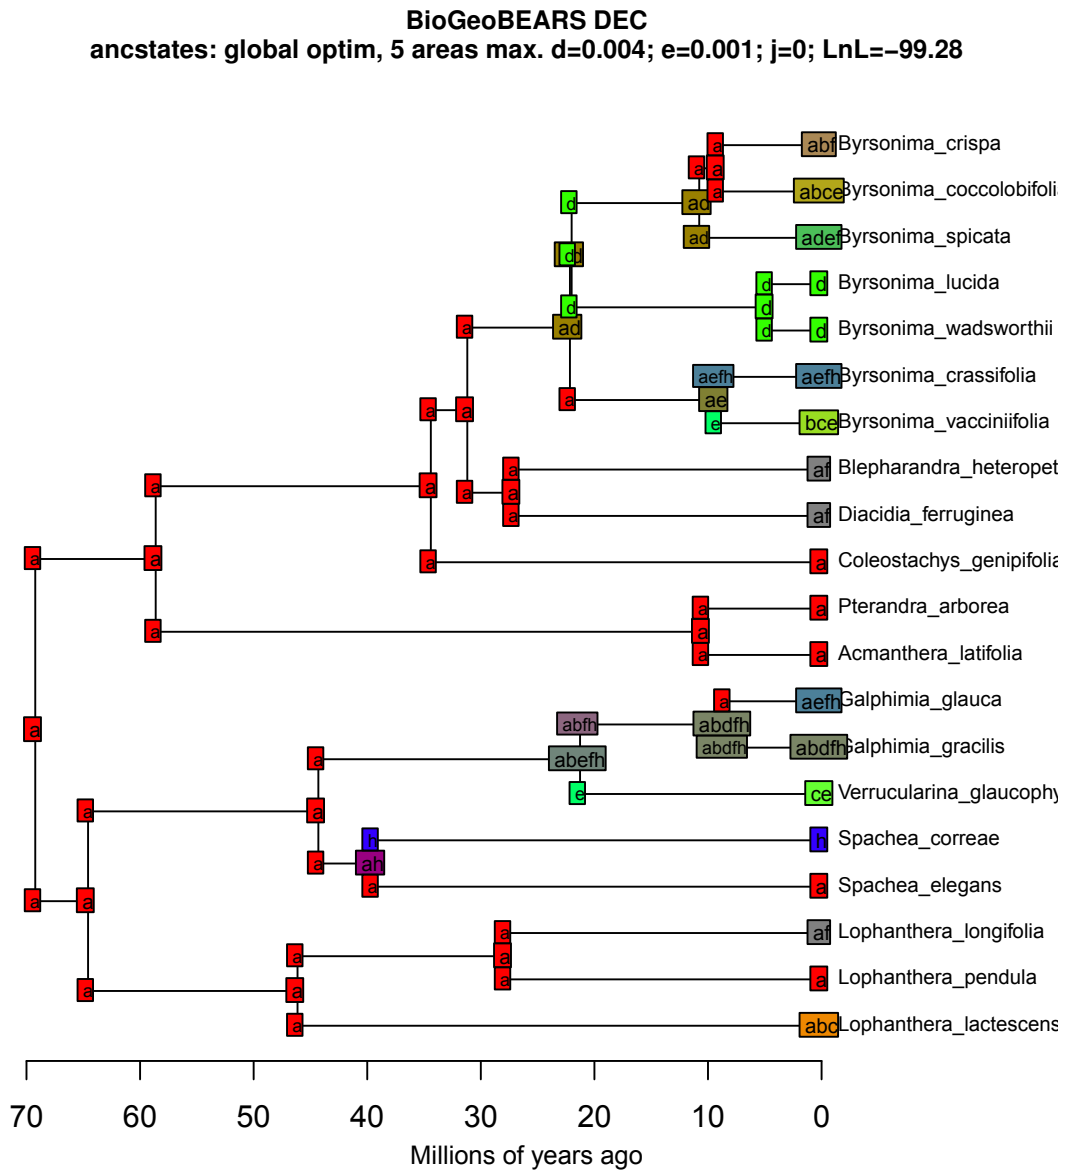

Figure S3: Clades of angiosperms

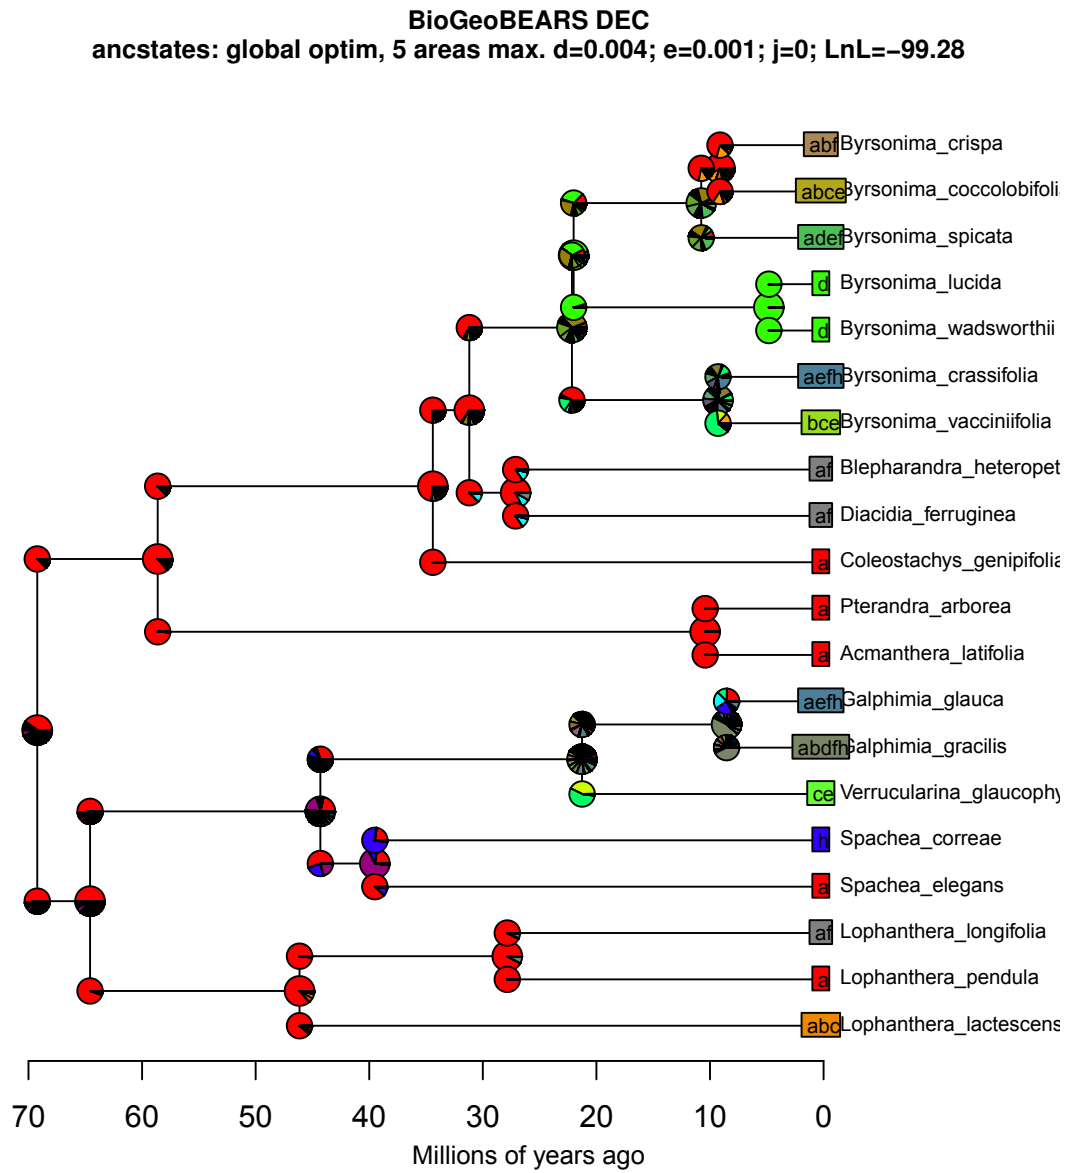

Figure S3: Clades of angiosperms

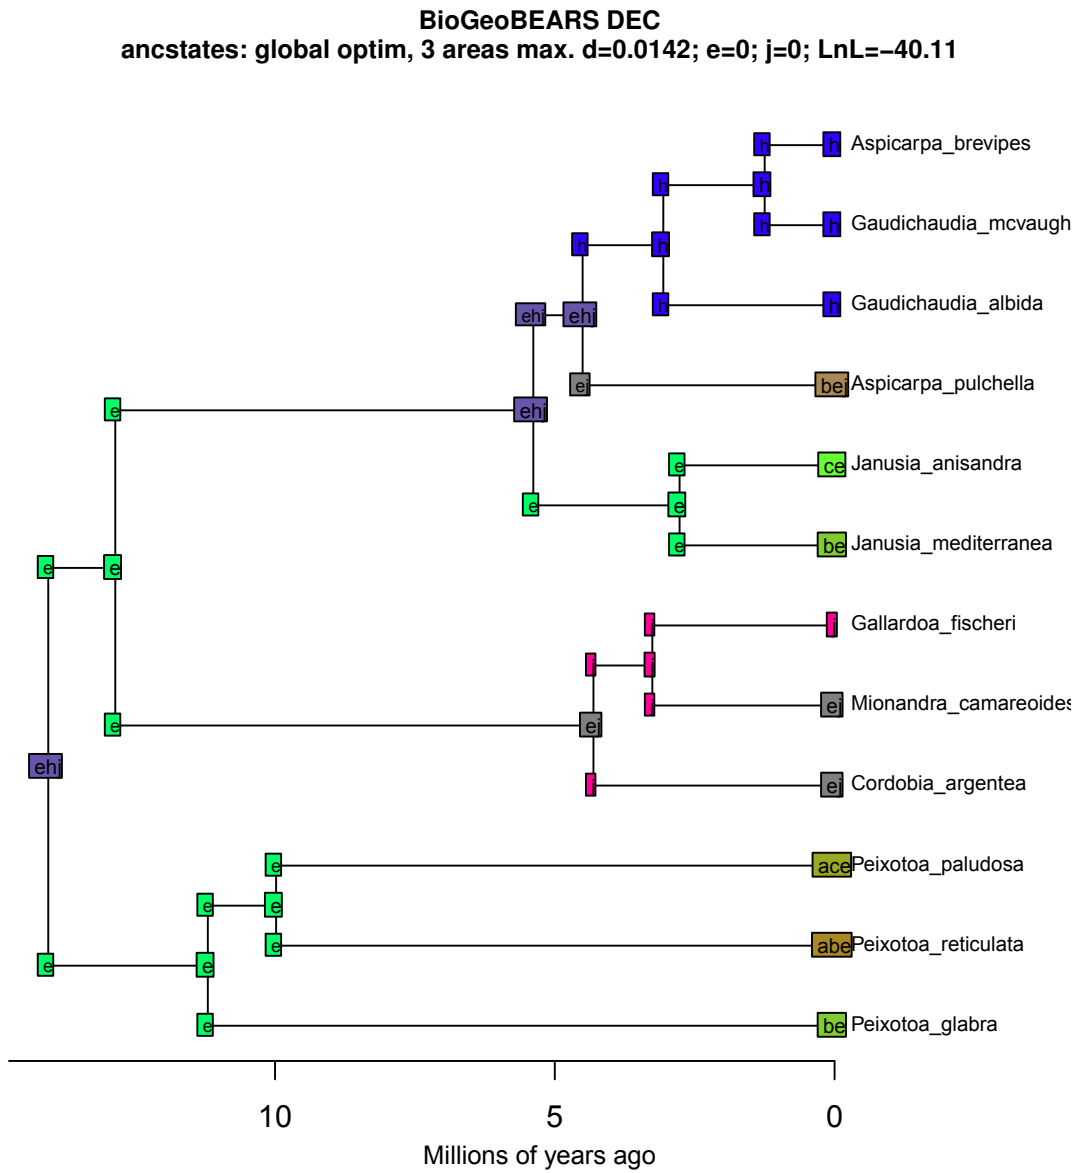

Figure S3: Clades of angiosperms

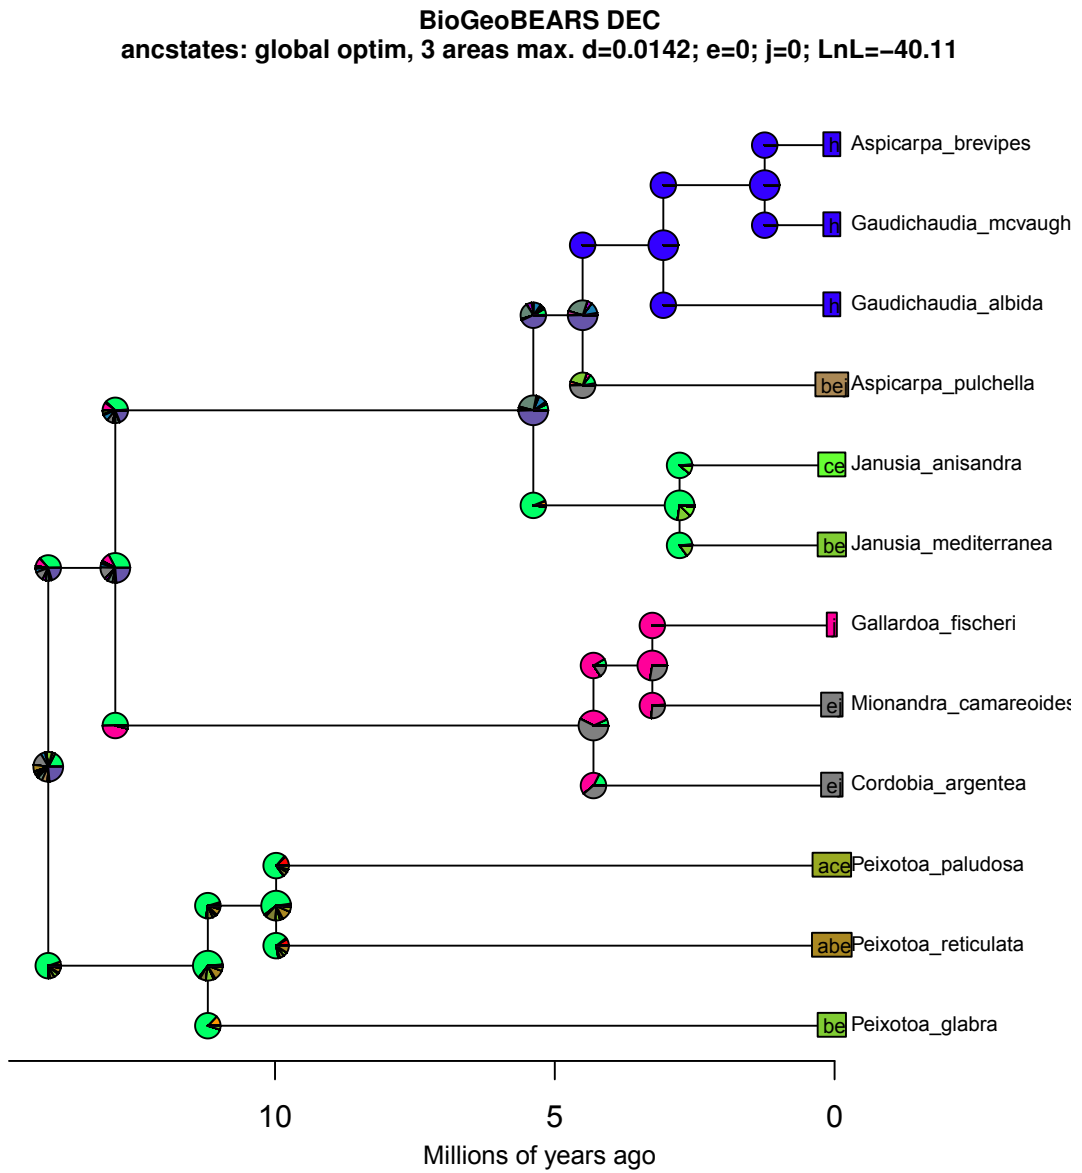

Figure S3: Clades of angiosperms

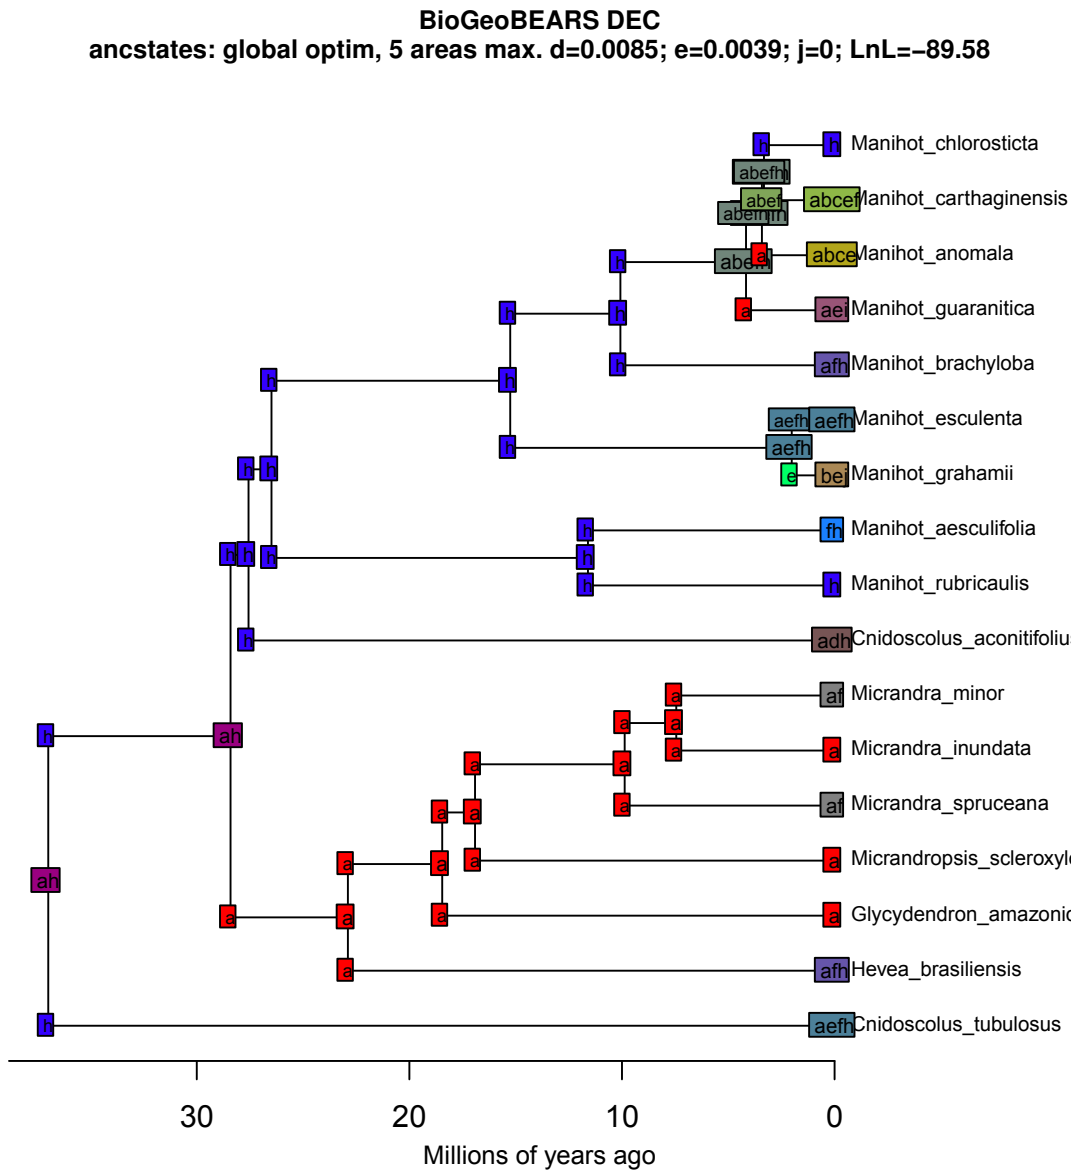



Figure S3: Clades of angiosperms

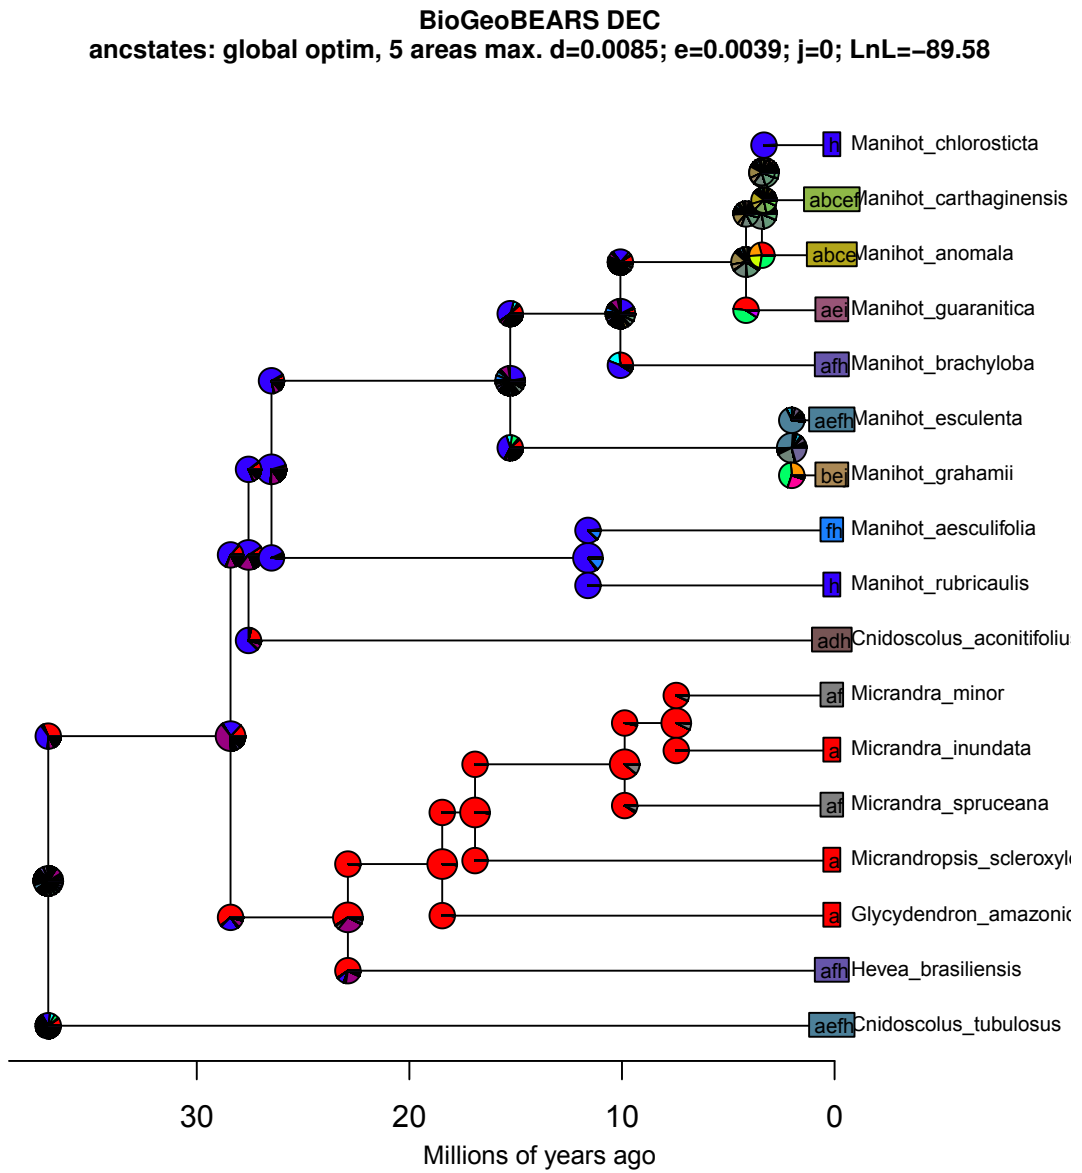

Figure S3: Clades of angiosperms

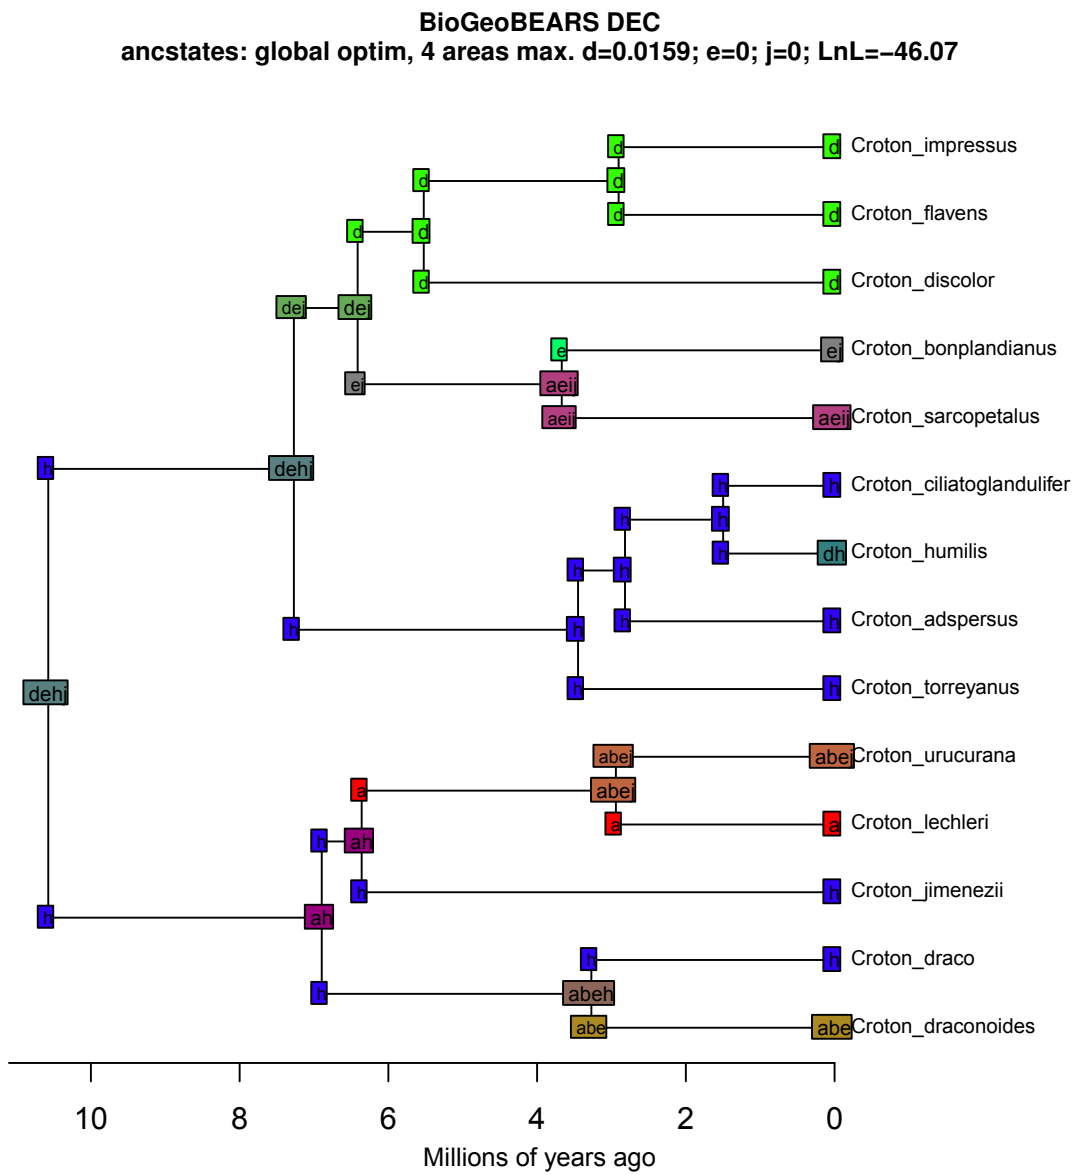

Figure S3: Clades of angiosperms

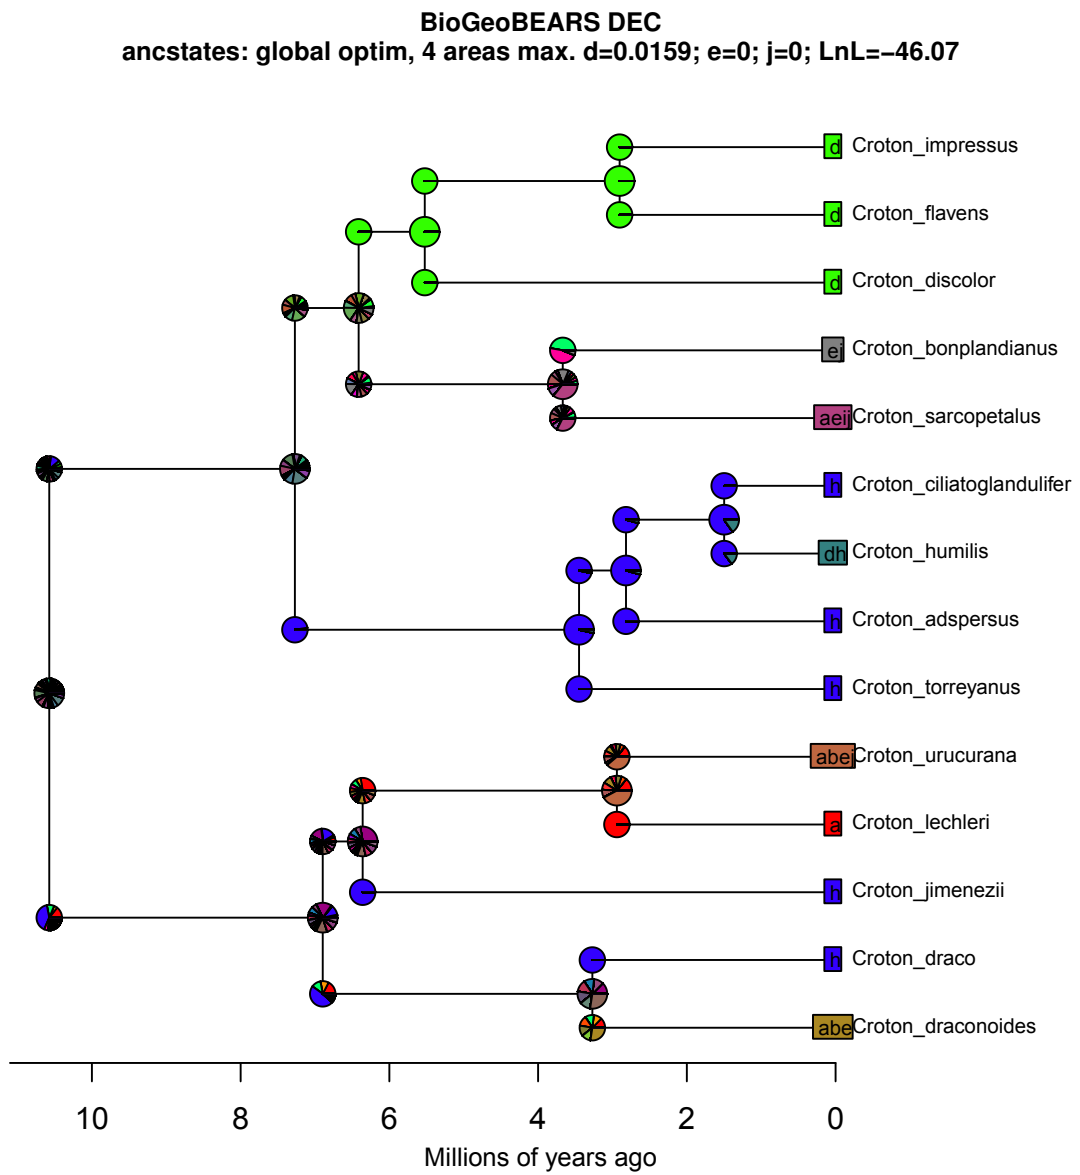

Figure S3: Clades of angiosperms

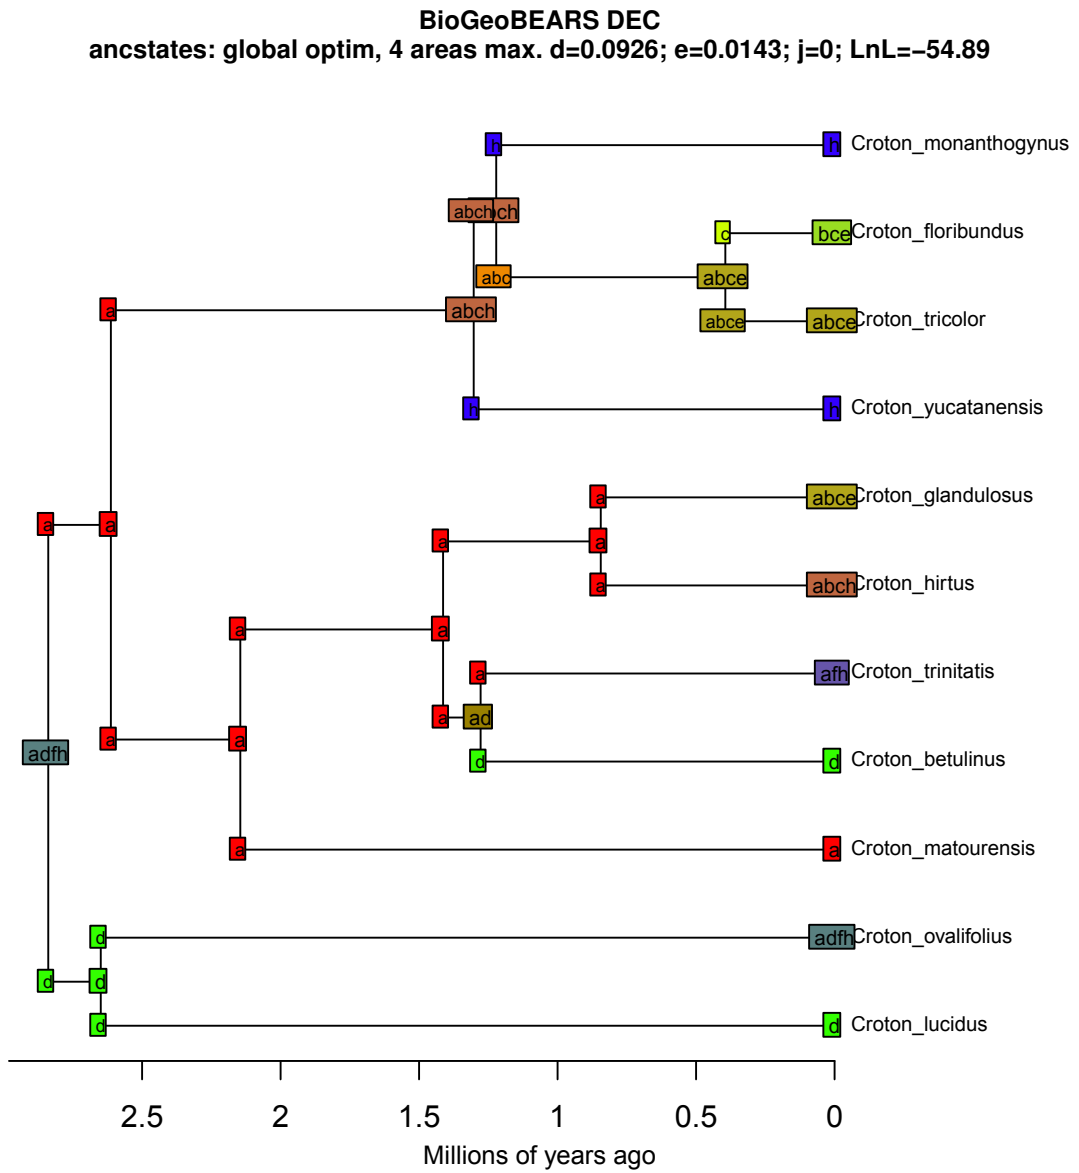

Figure S3: Clades of angiosperms

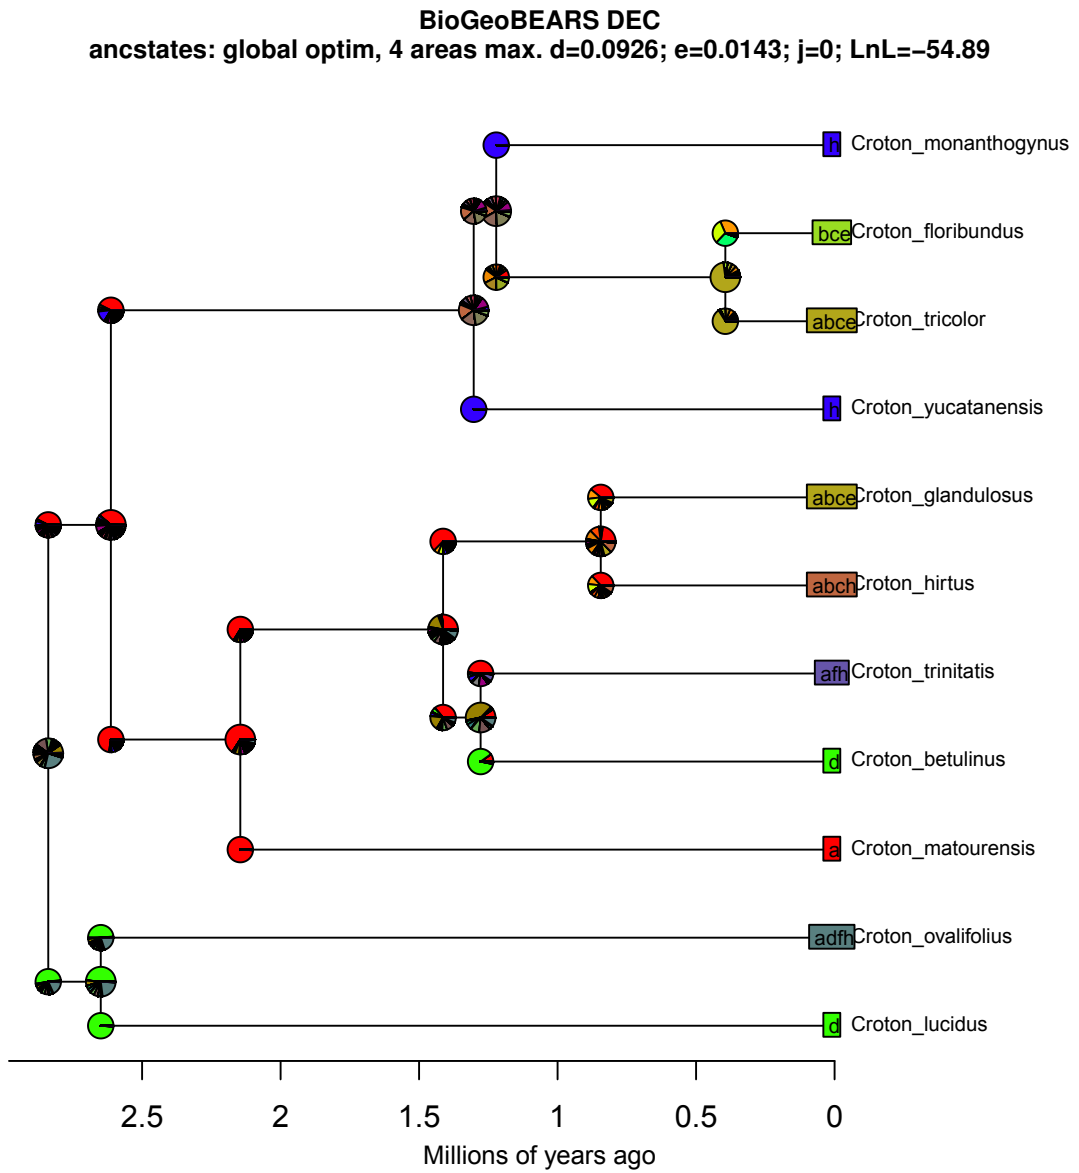

Figure S3: Clades of angiosperms

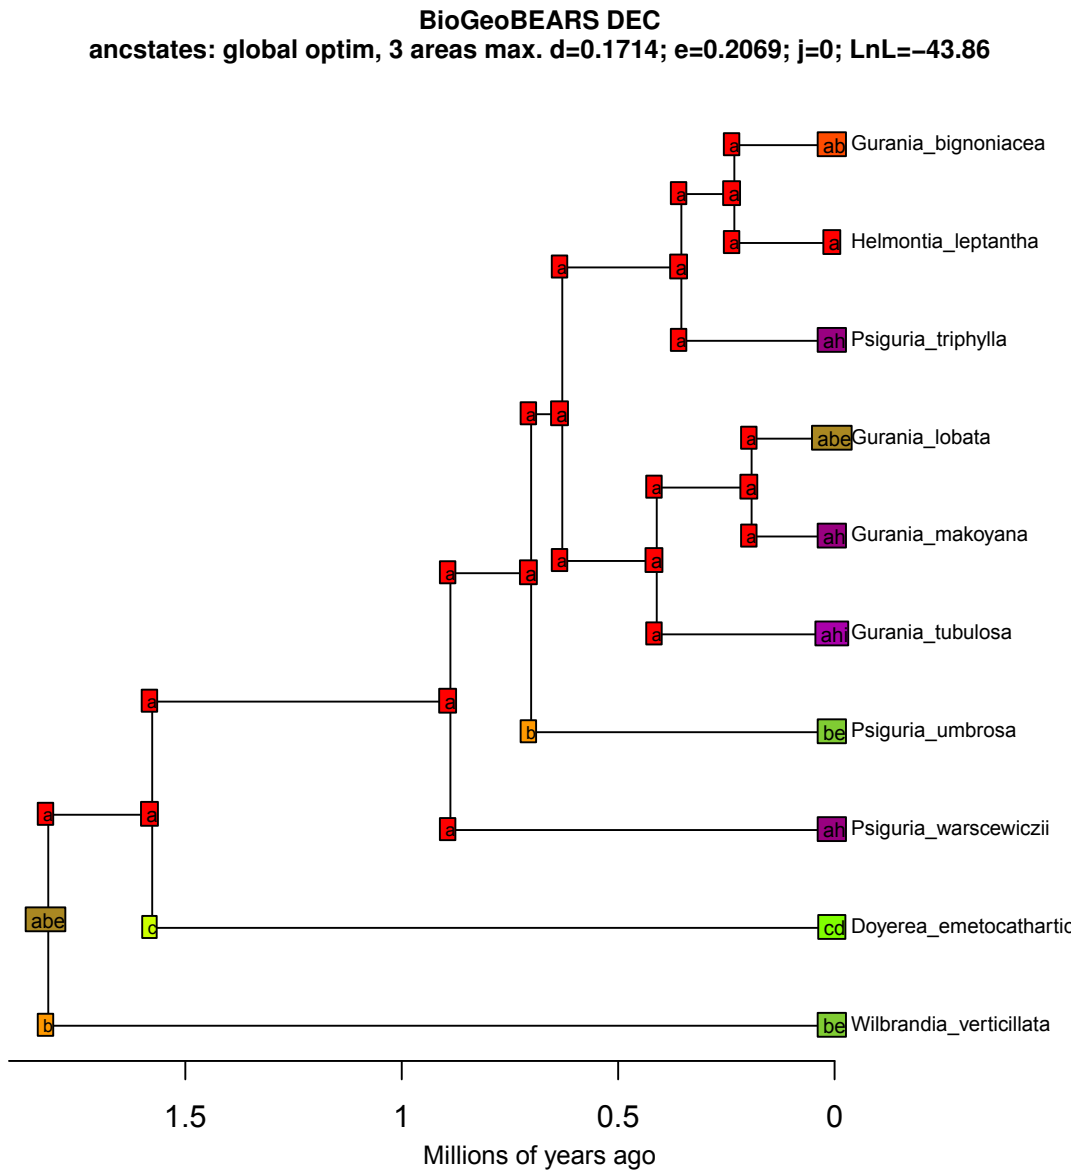

Figure S3: Clades of angiosperms

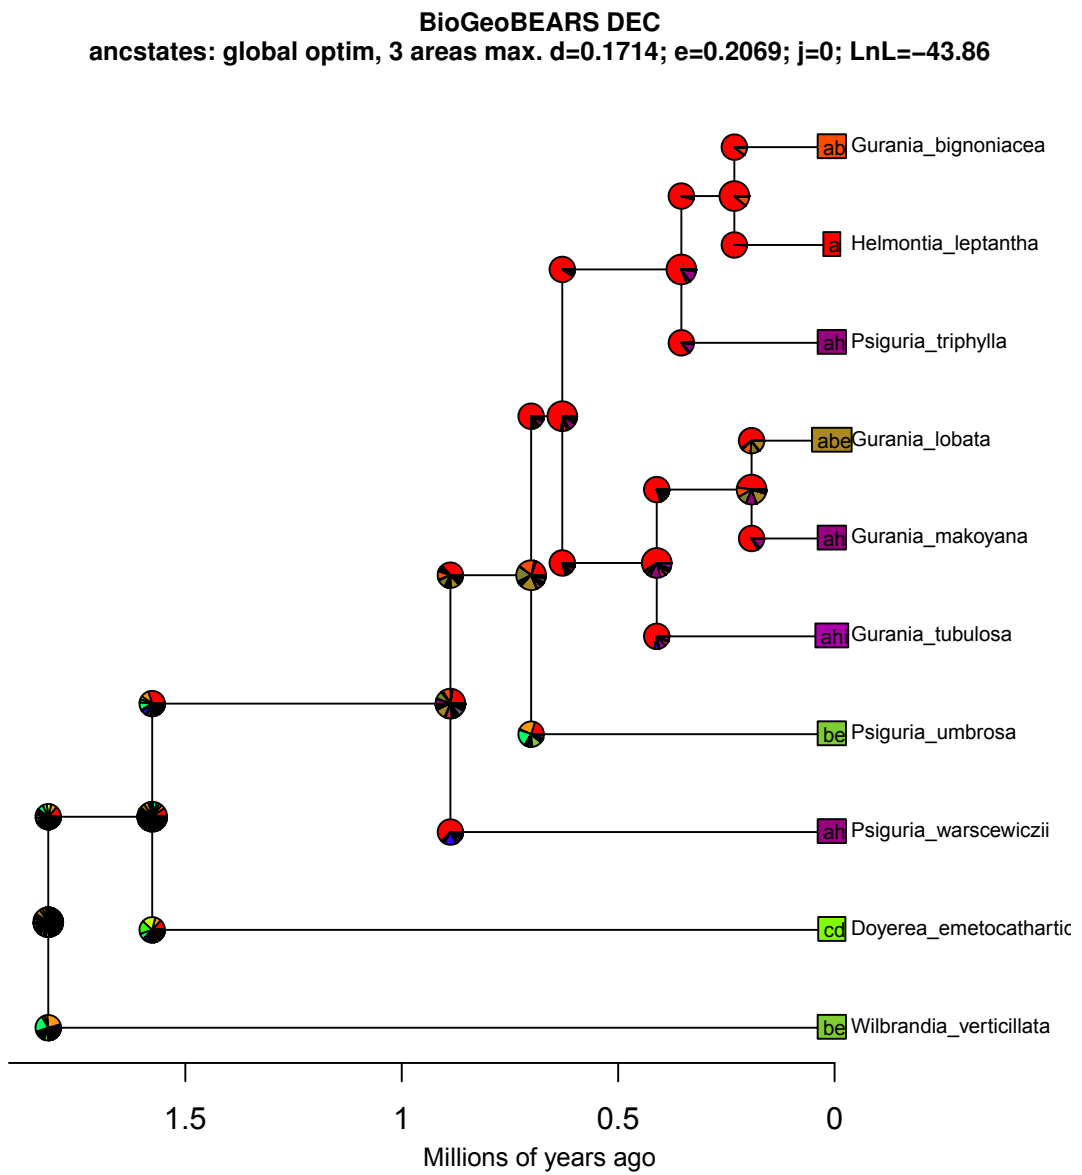

Figure S3: Clades of angiosperms

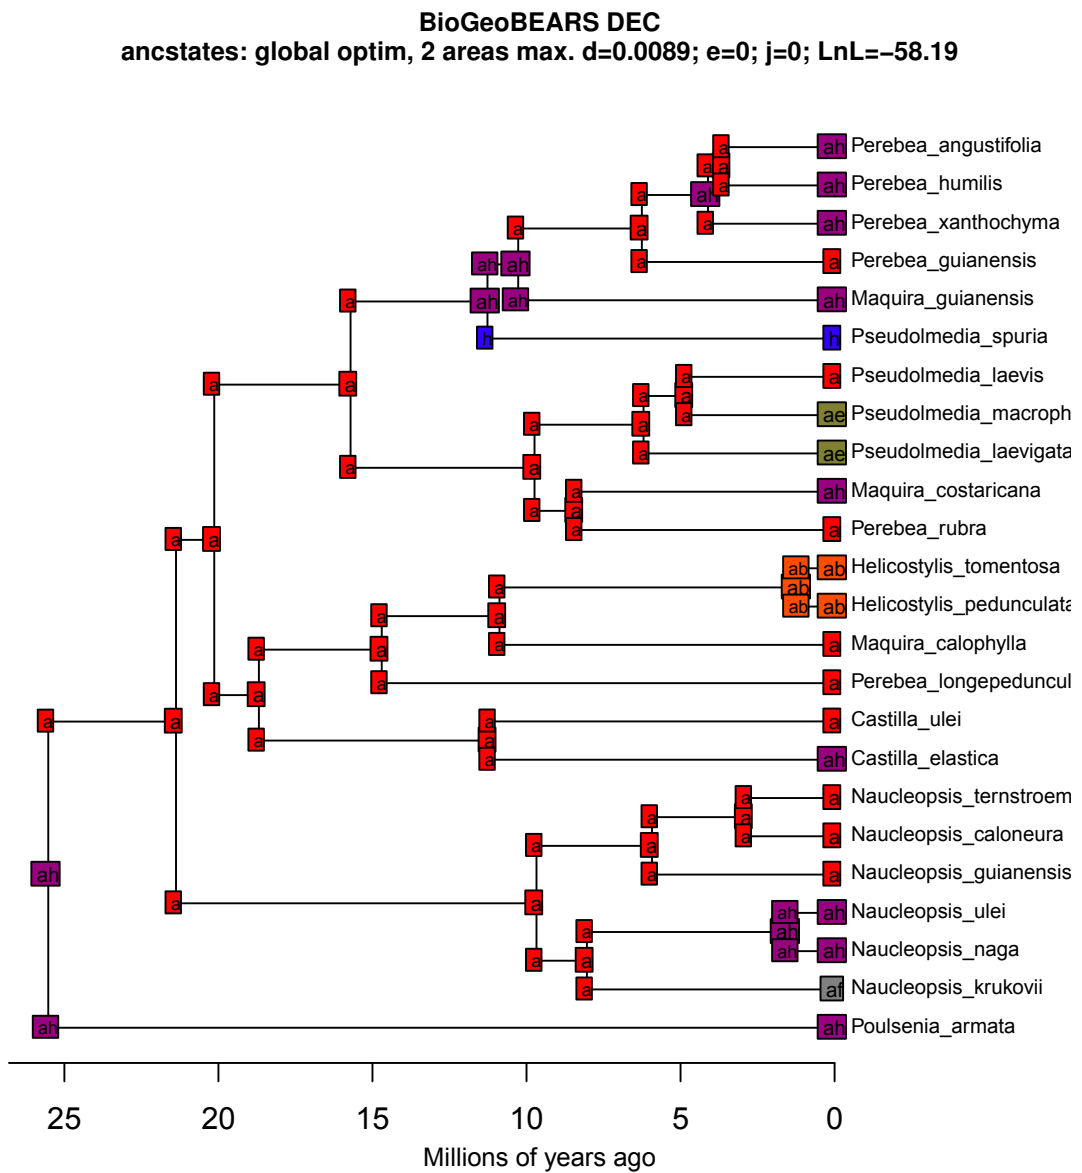



Figure S3: Clades of angiosperms

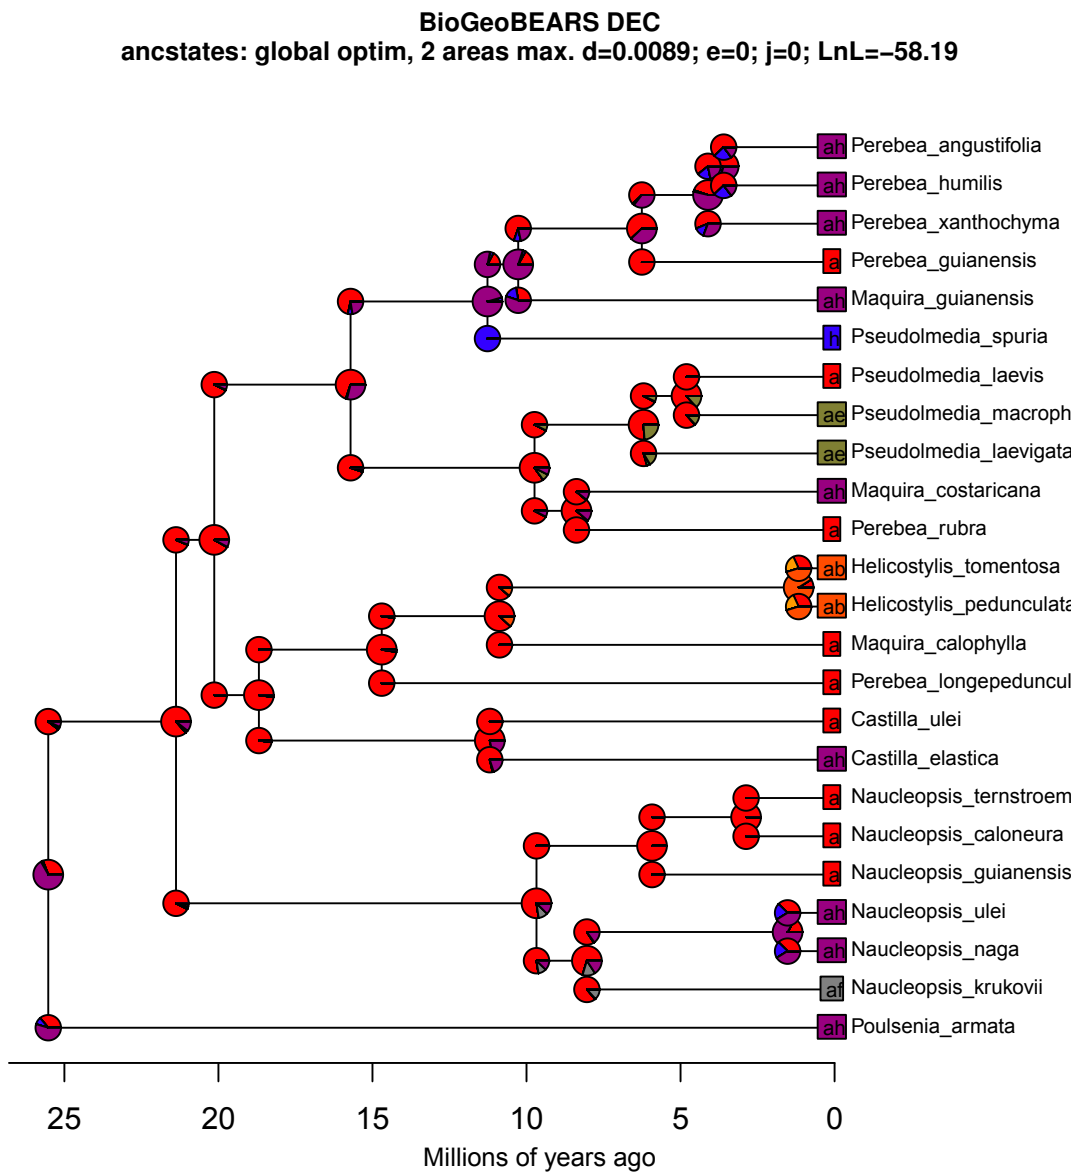

Figure S3: Clades of angiosperms

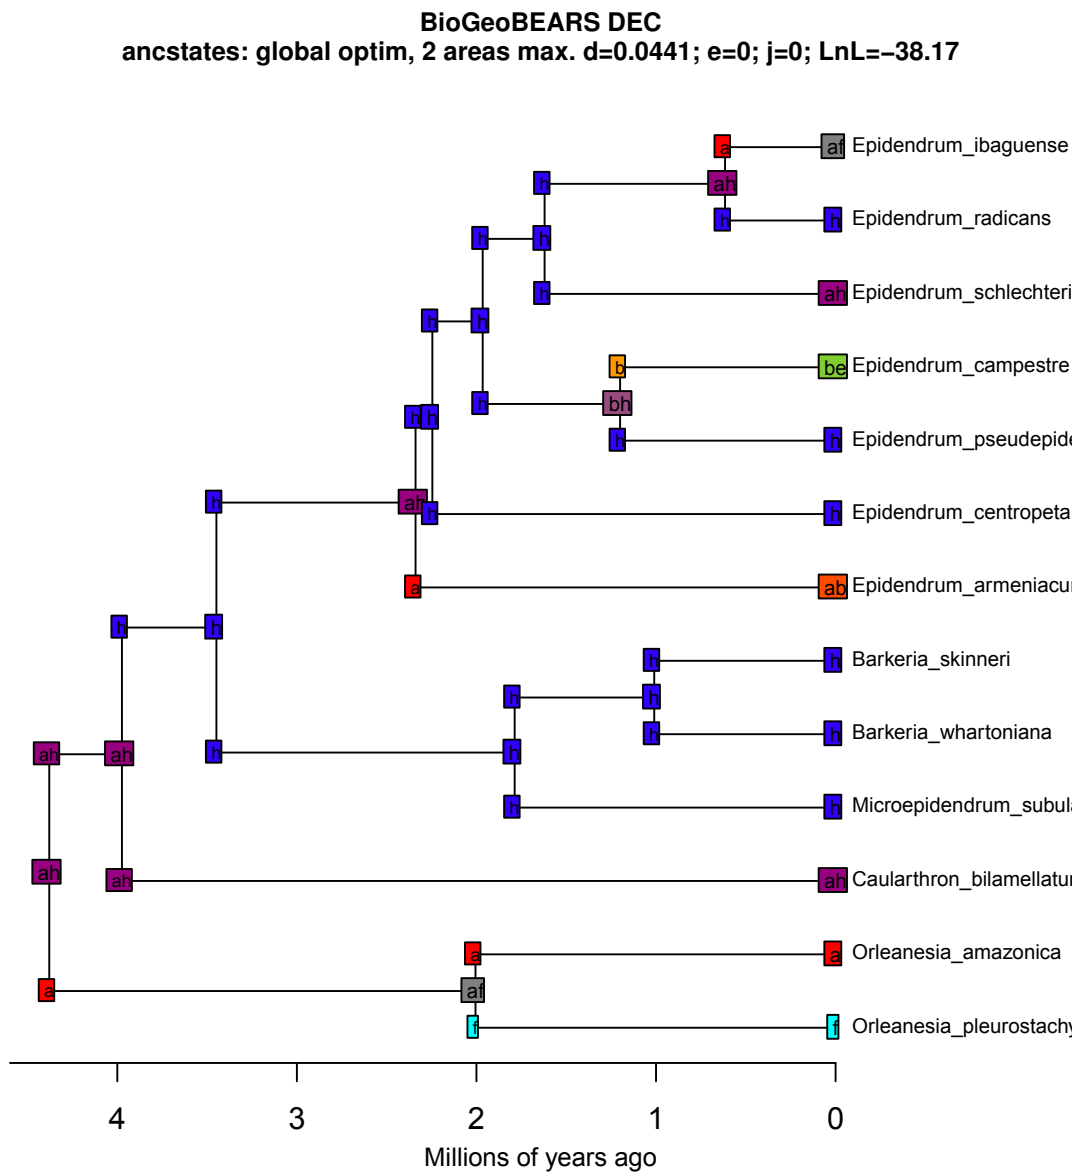

Figure S3: Clades of angiosperms

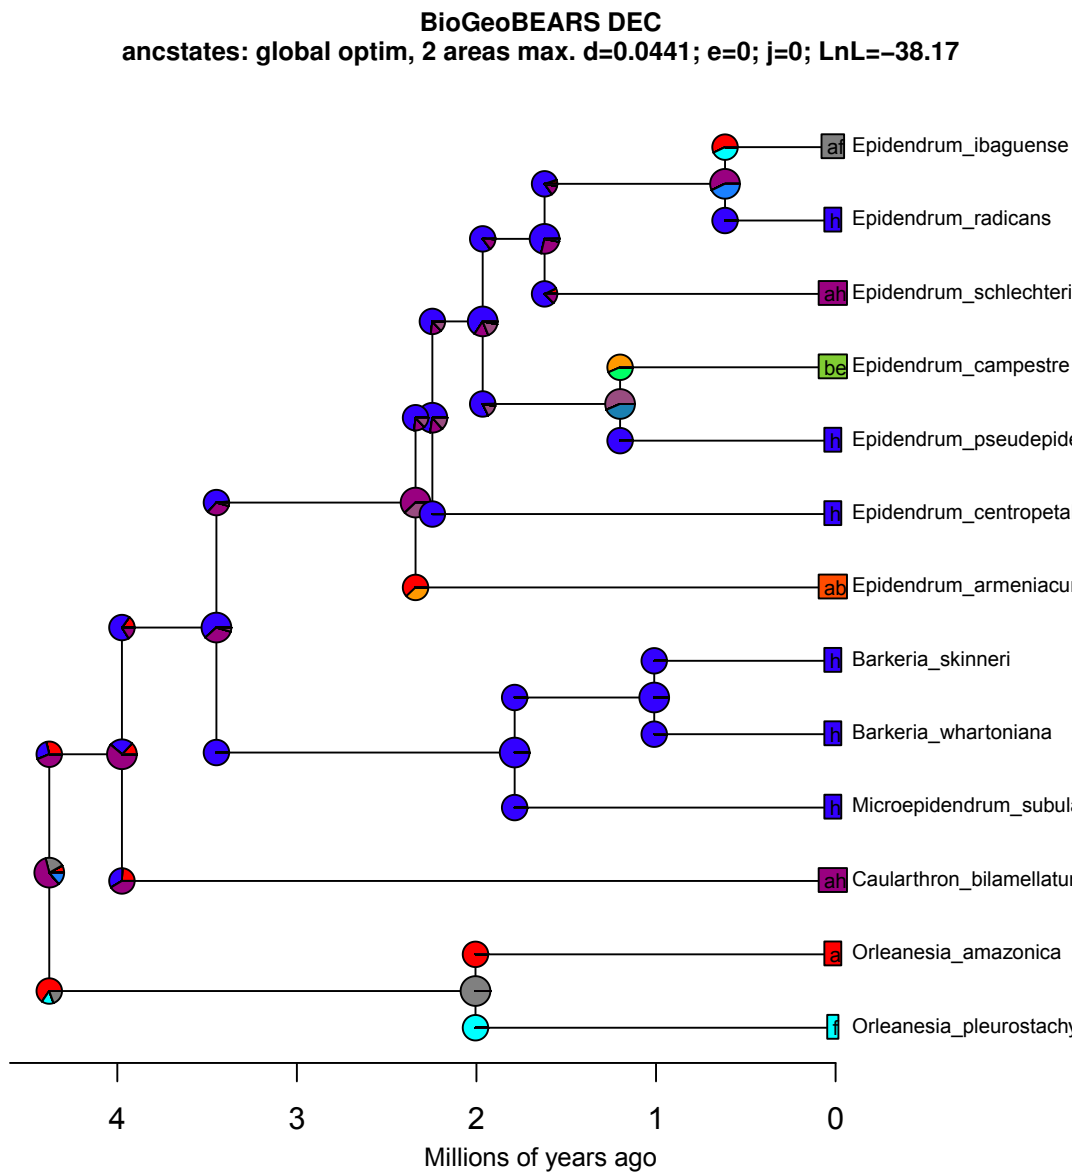

Figure S3: Clades of angiosperms

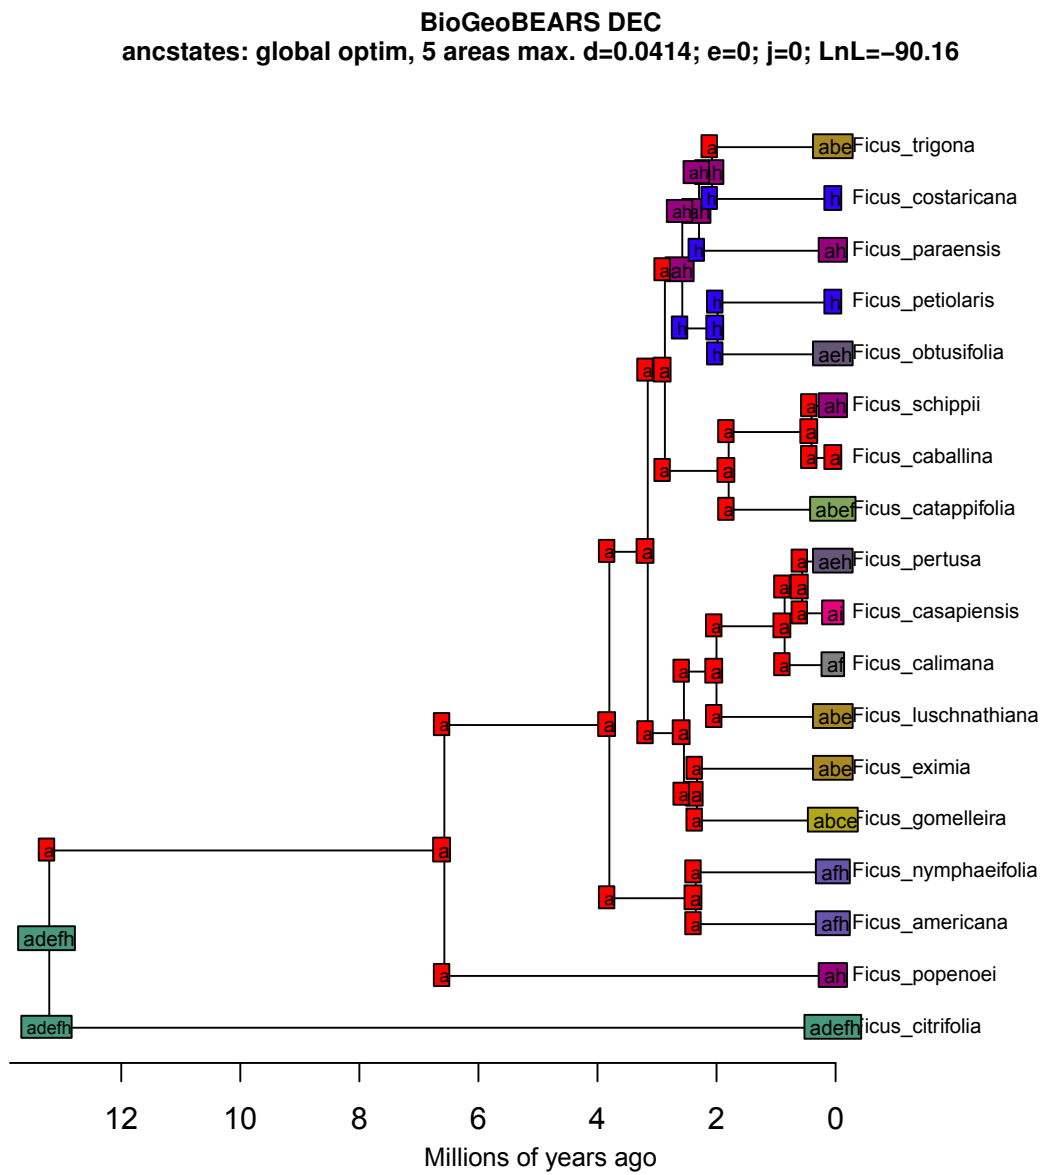

Figure S3: Clades of angiosperms

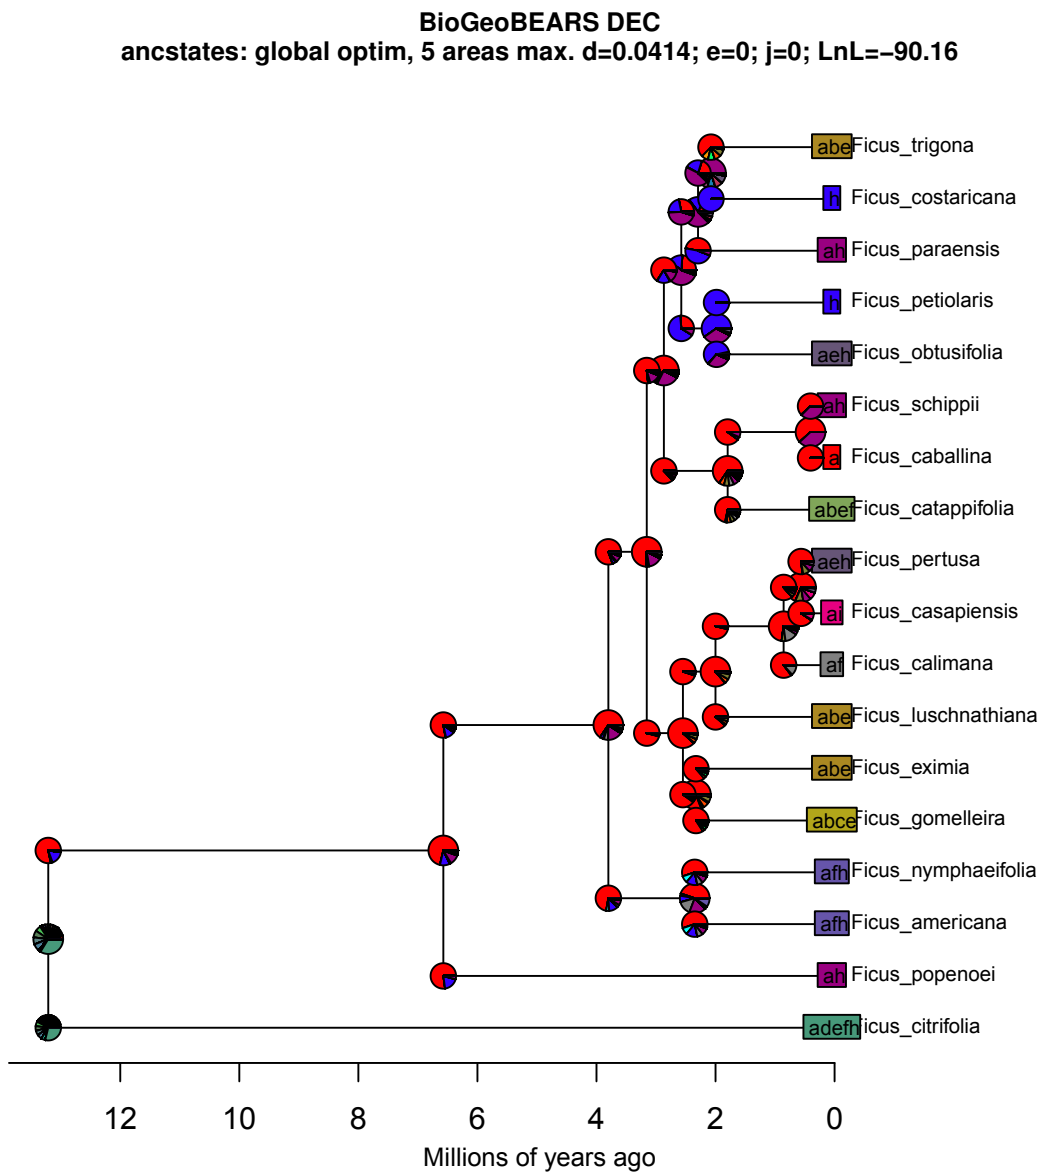

Figure S3: Clades of angiosperms

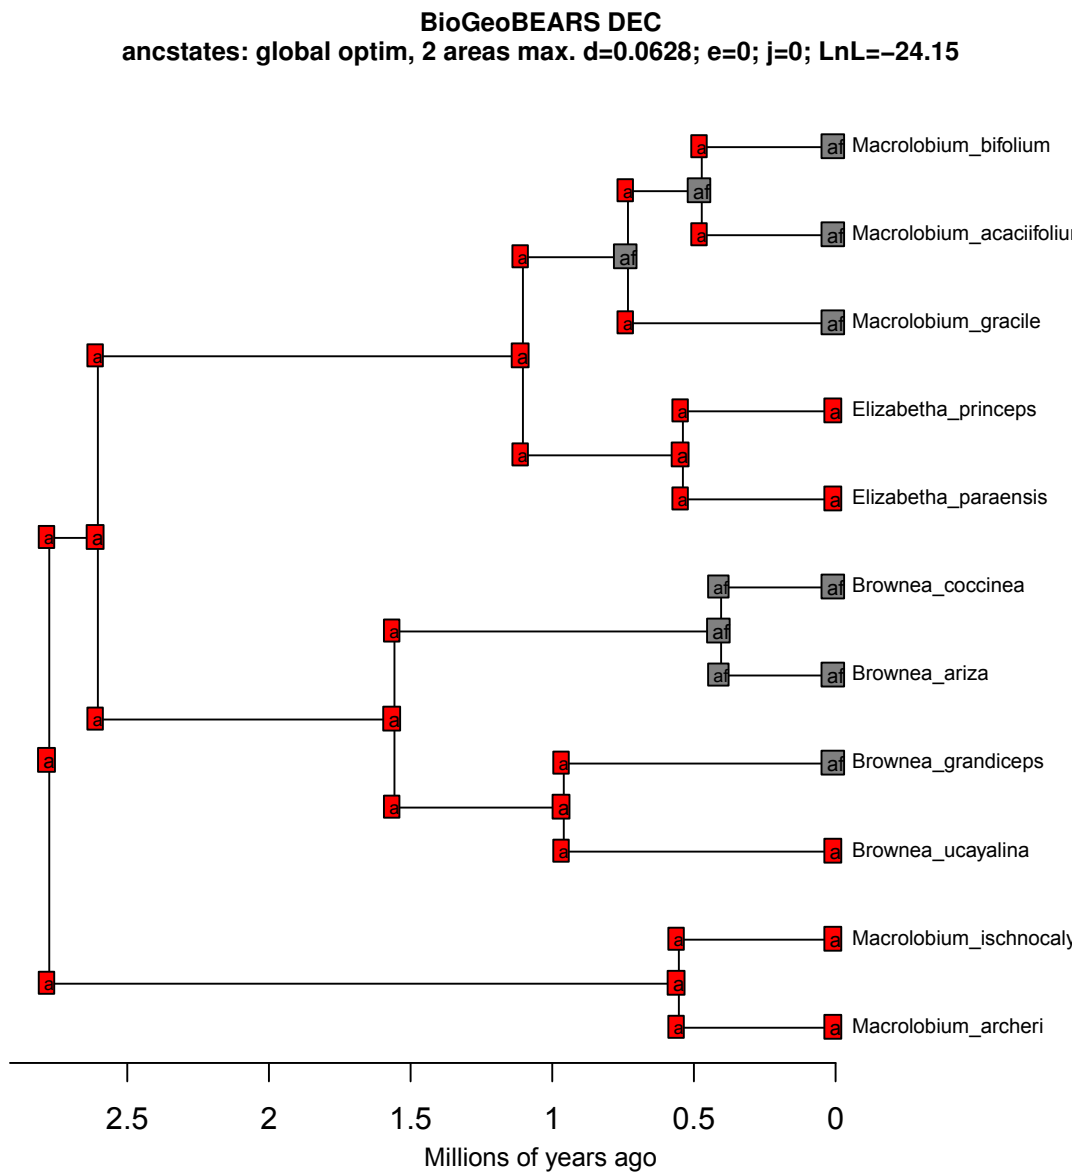

Figure S3: Clades of angiosperms

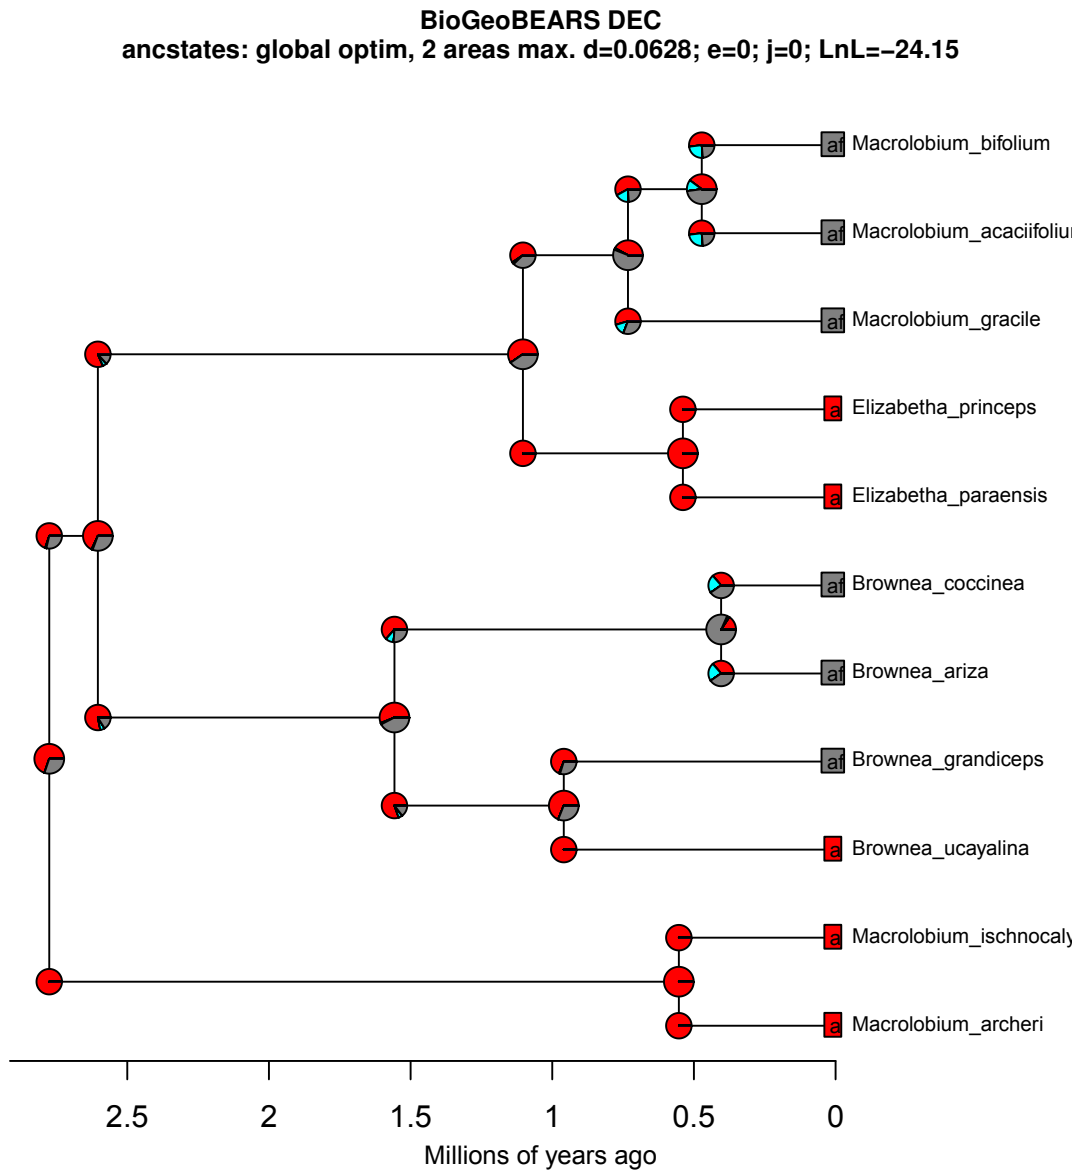

Figure S3: Clades of angiosperms

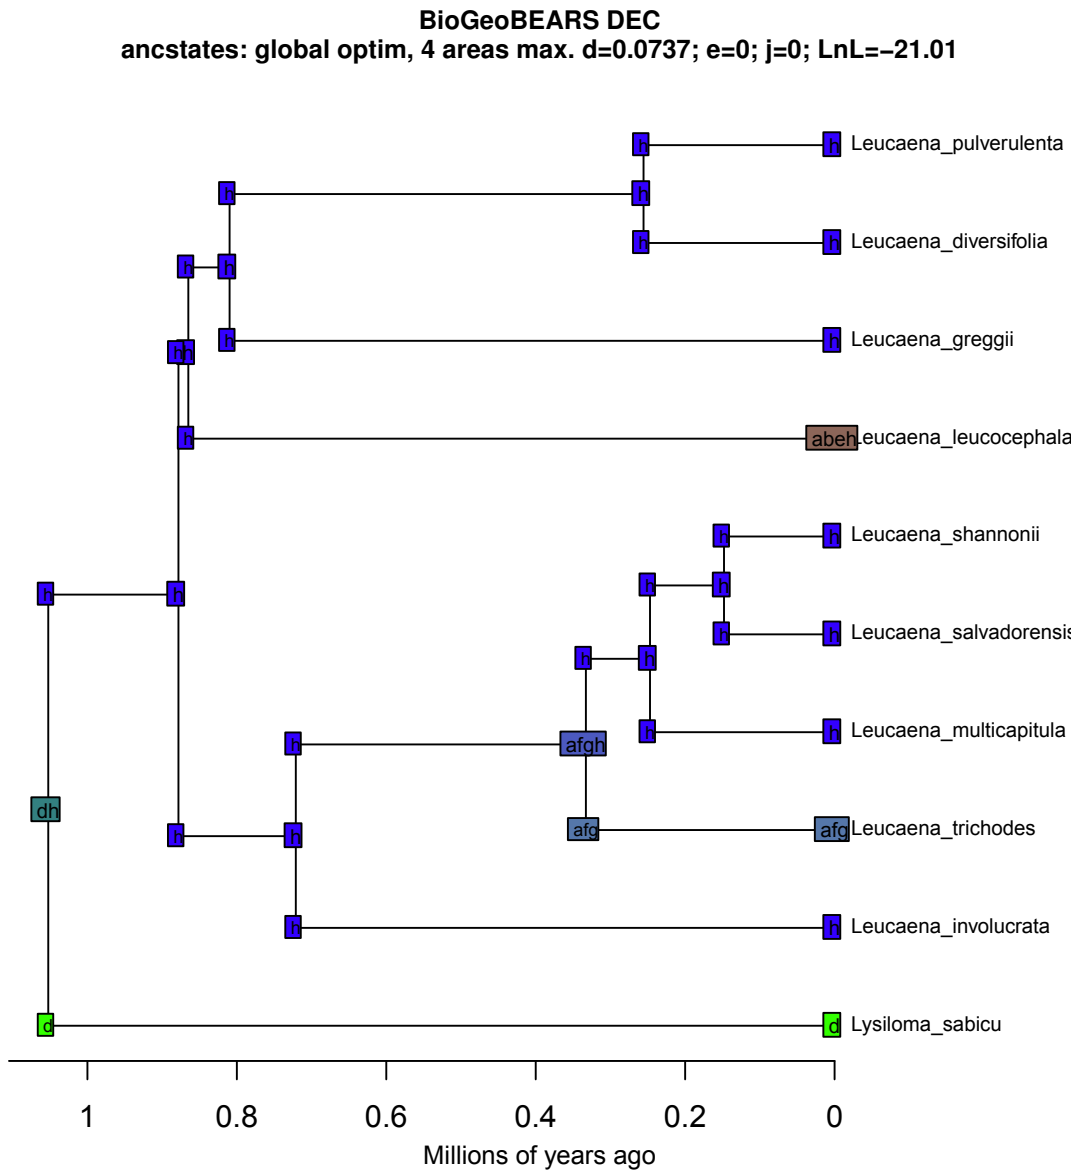



Figure S3: Clades of angiosperms

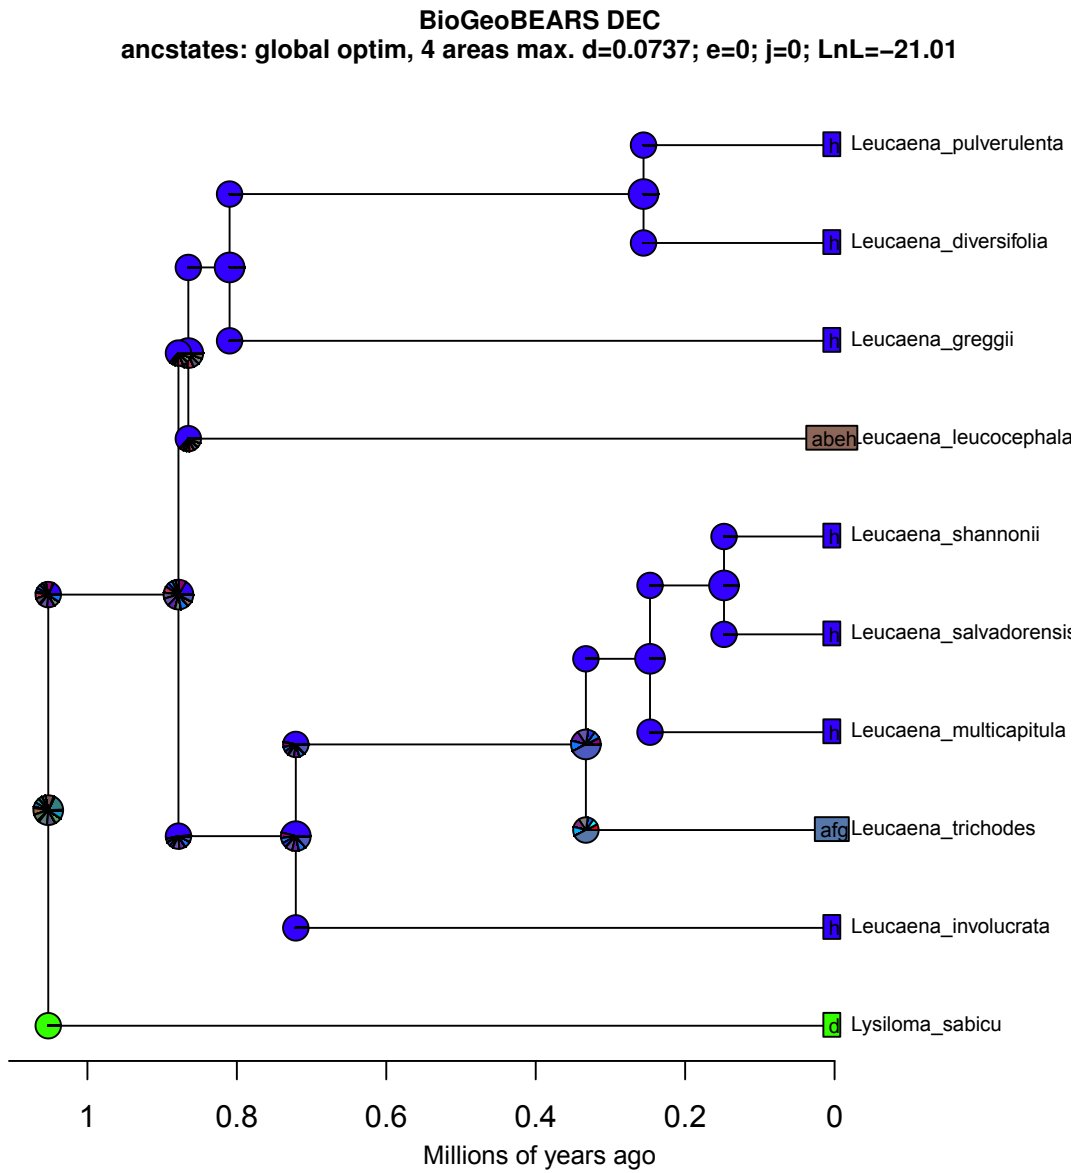

Figure S3: Clades of angiosperms

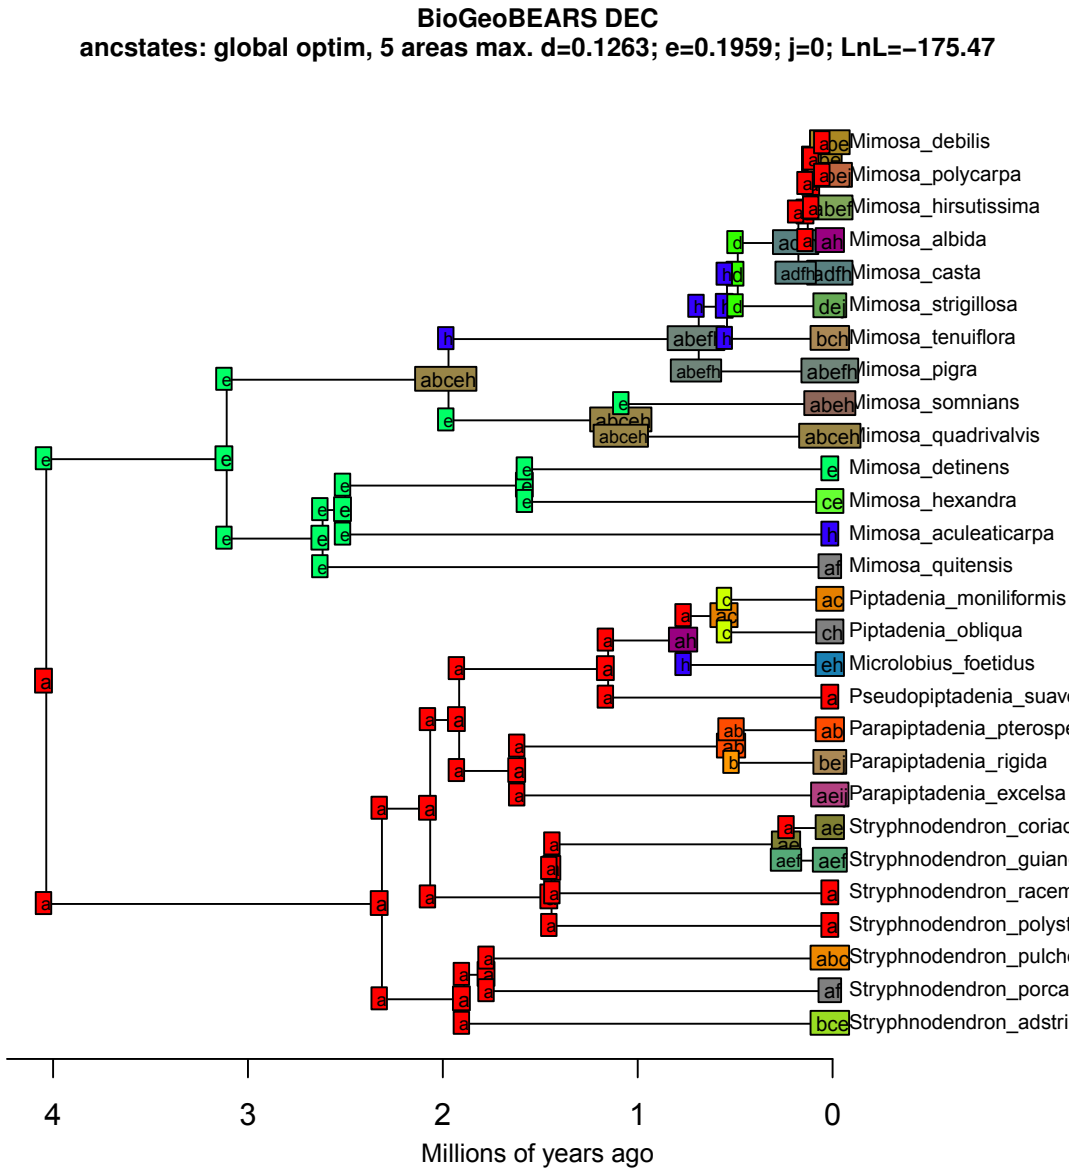

Figure S3: Clades of angiosperms

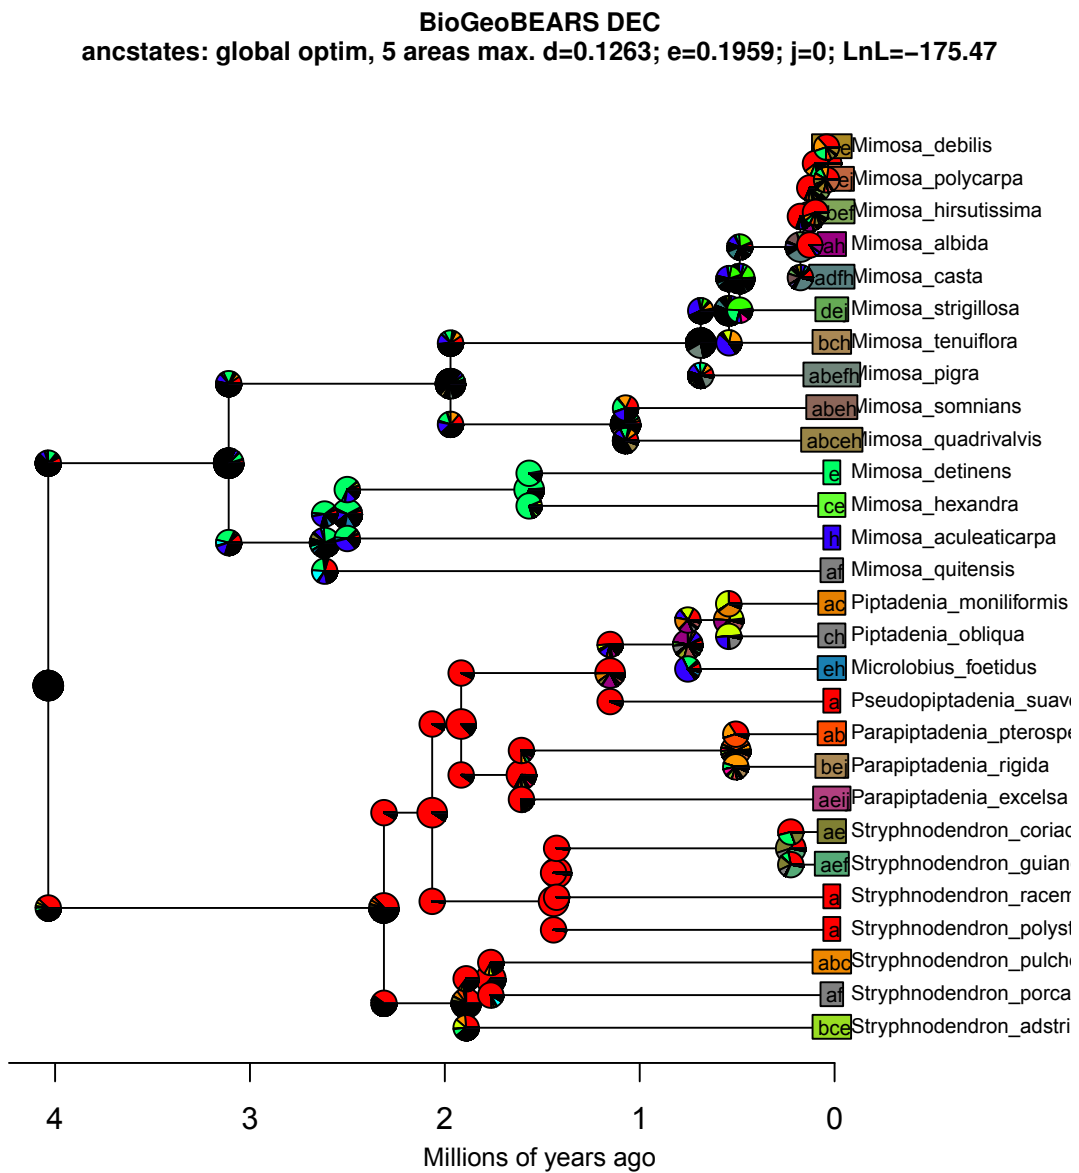

Figure S3: Clades of angiosperms

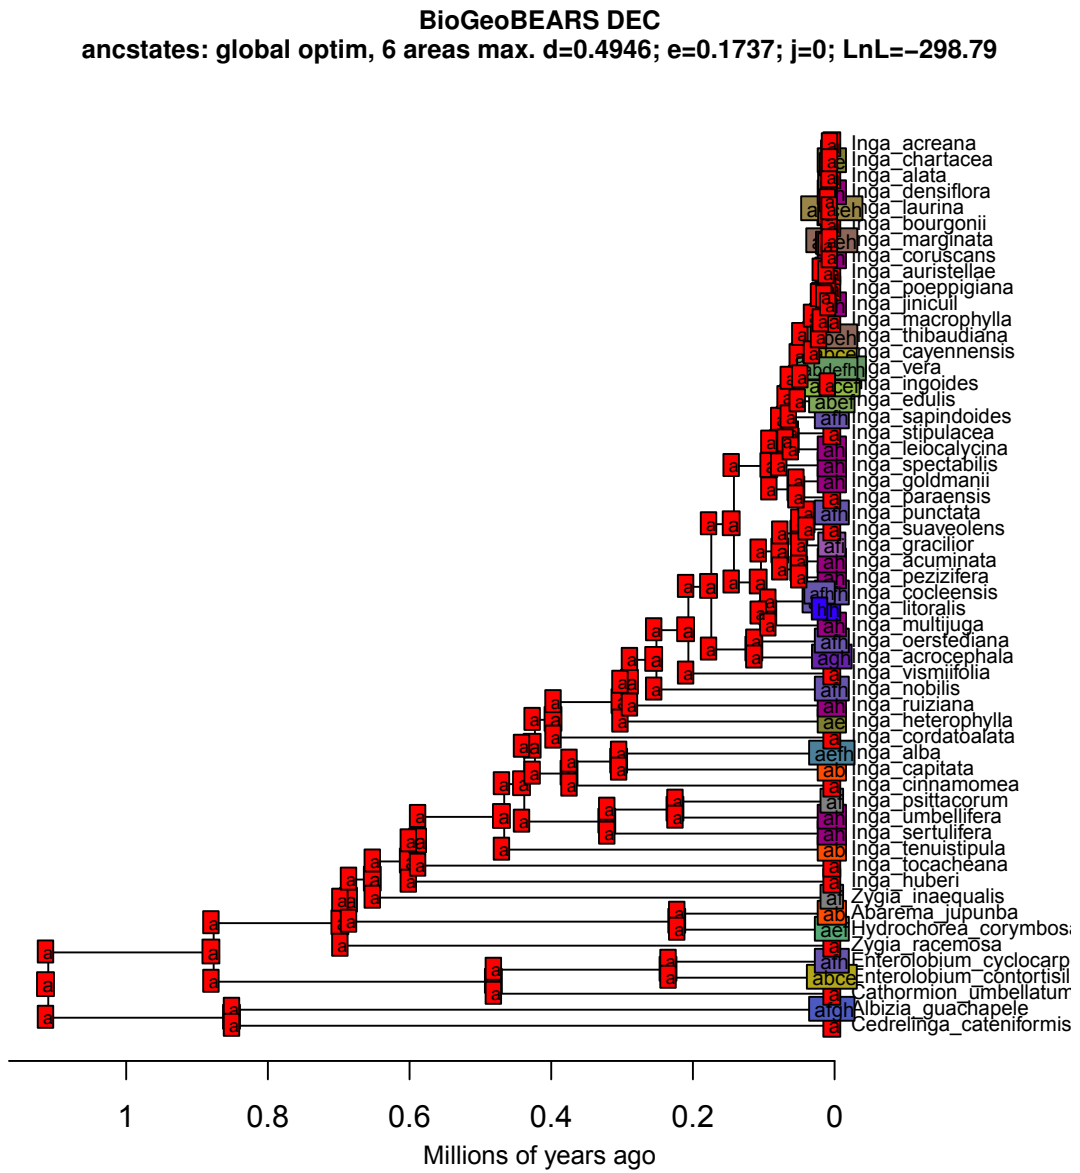

Figure S3: Clades of angiosperms

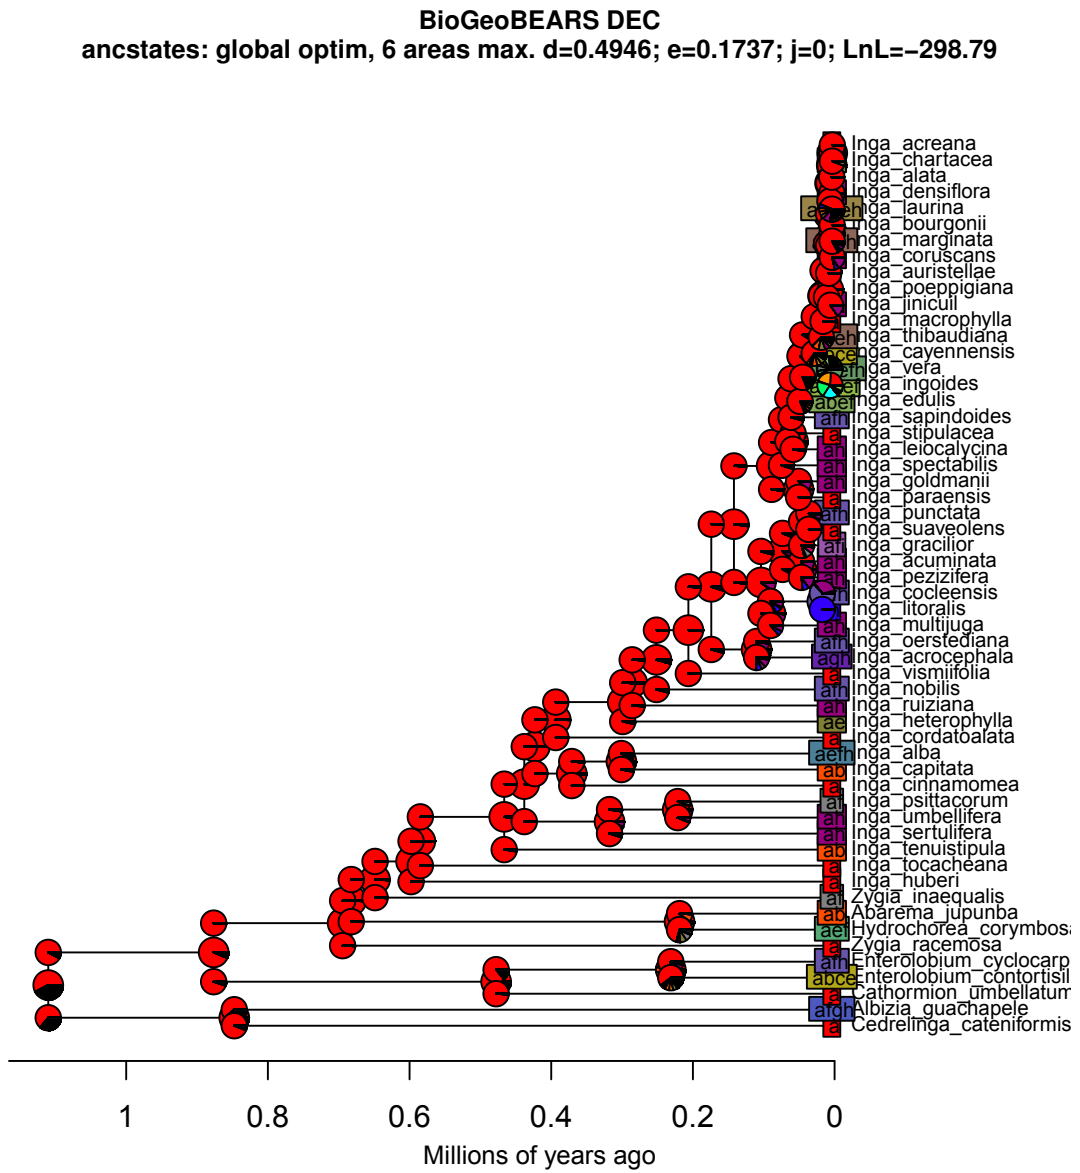

Figure S3: Clades of angiosperms

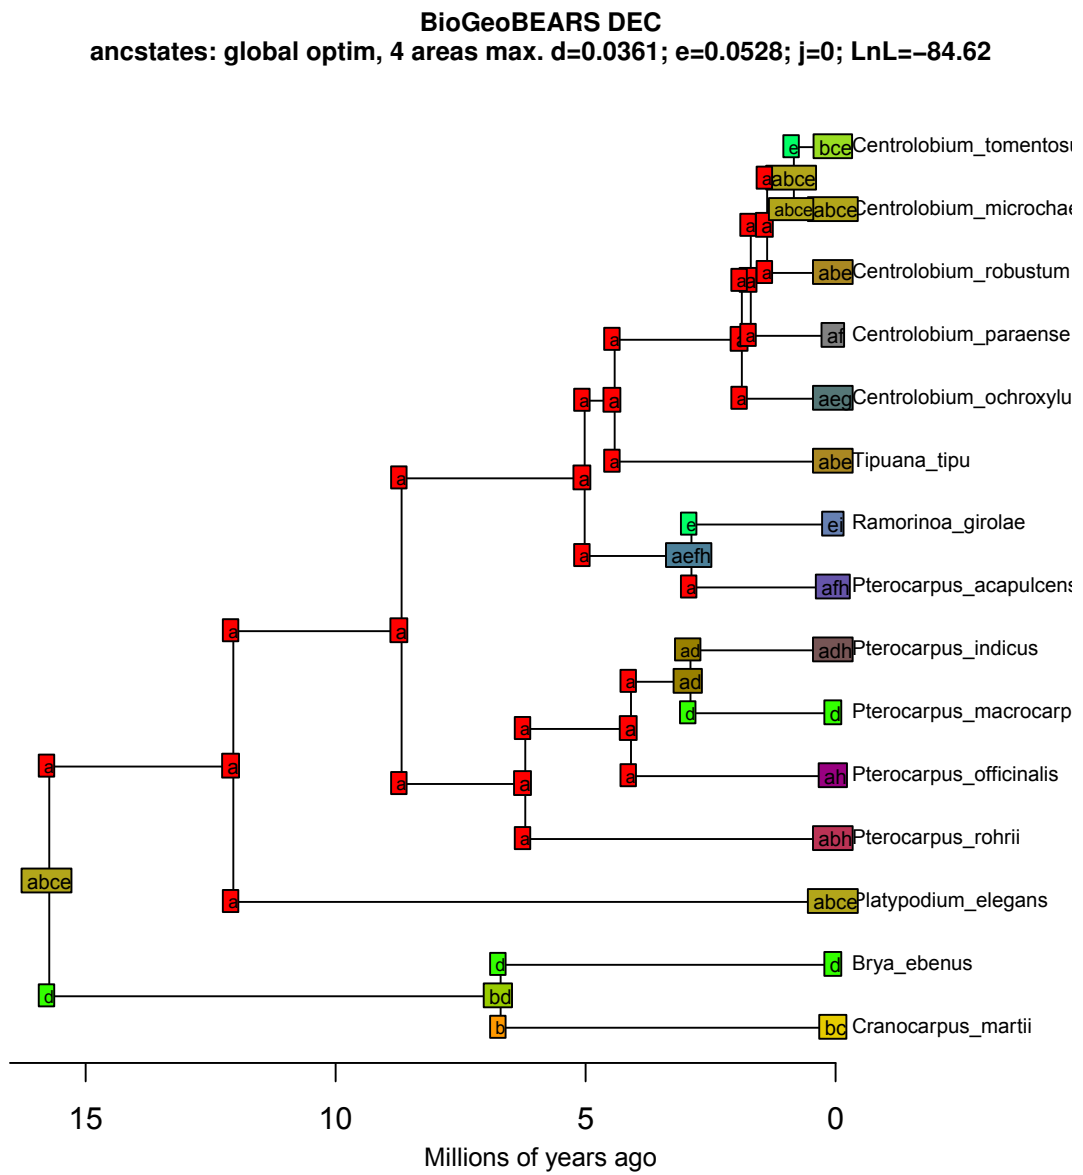

Figure S3: Clades of angiosperms

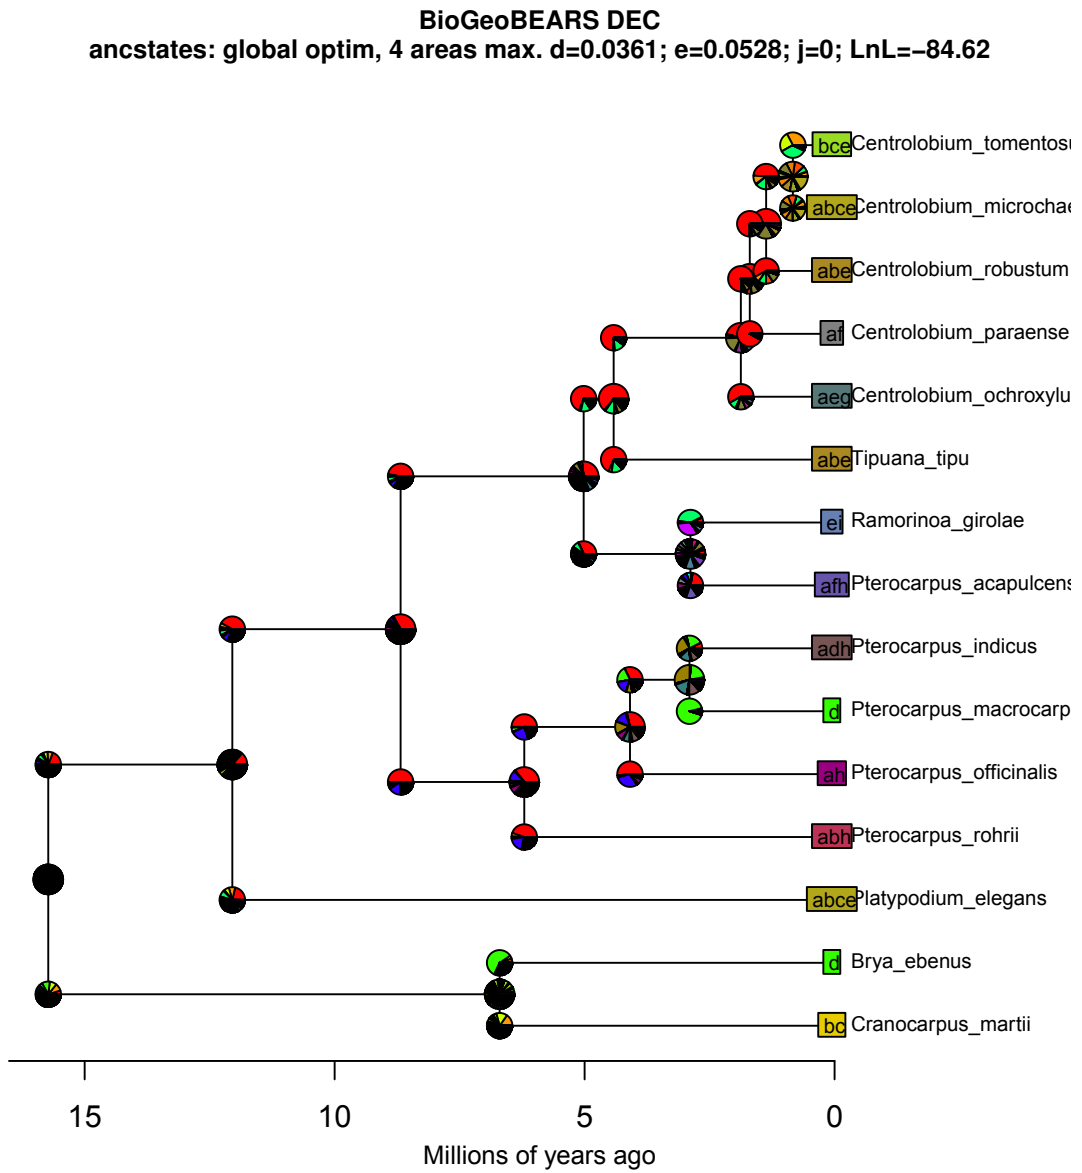

Figure S3: Clades of angiosperms

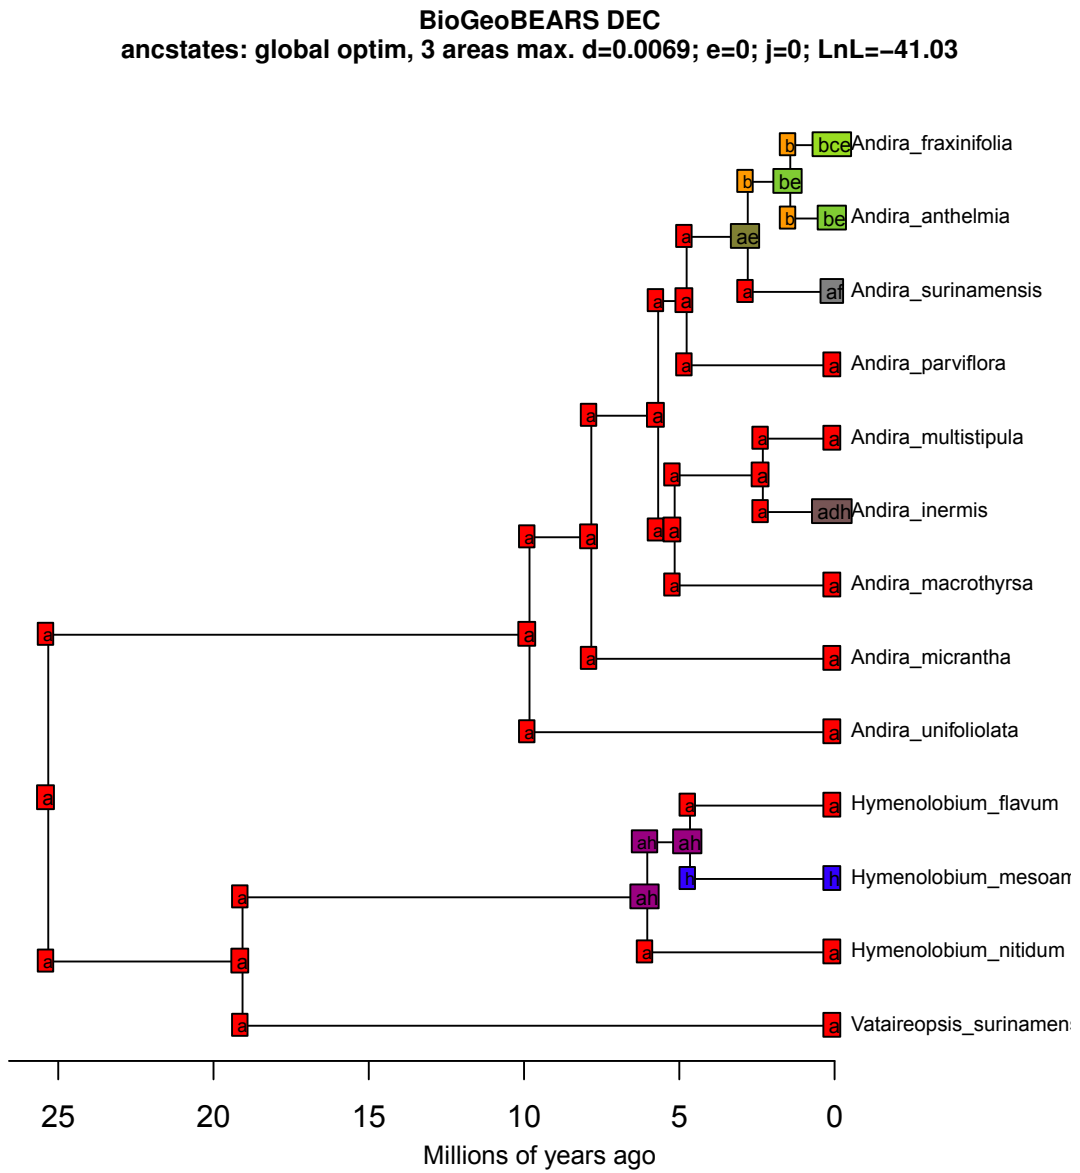



Figure S3: Clades of angiosperms

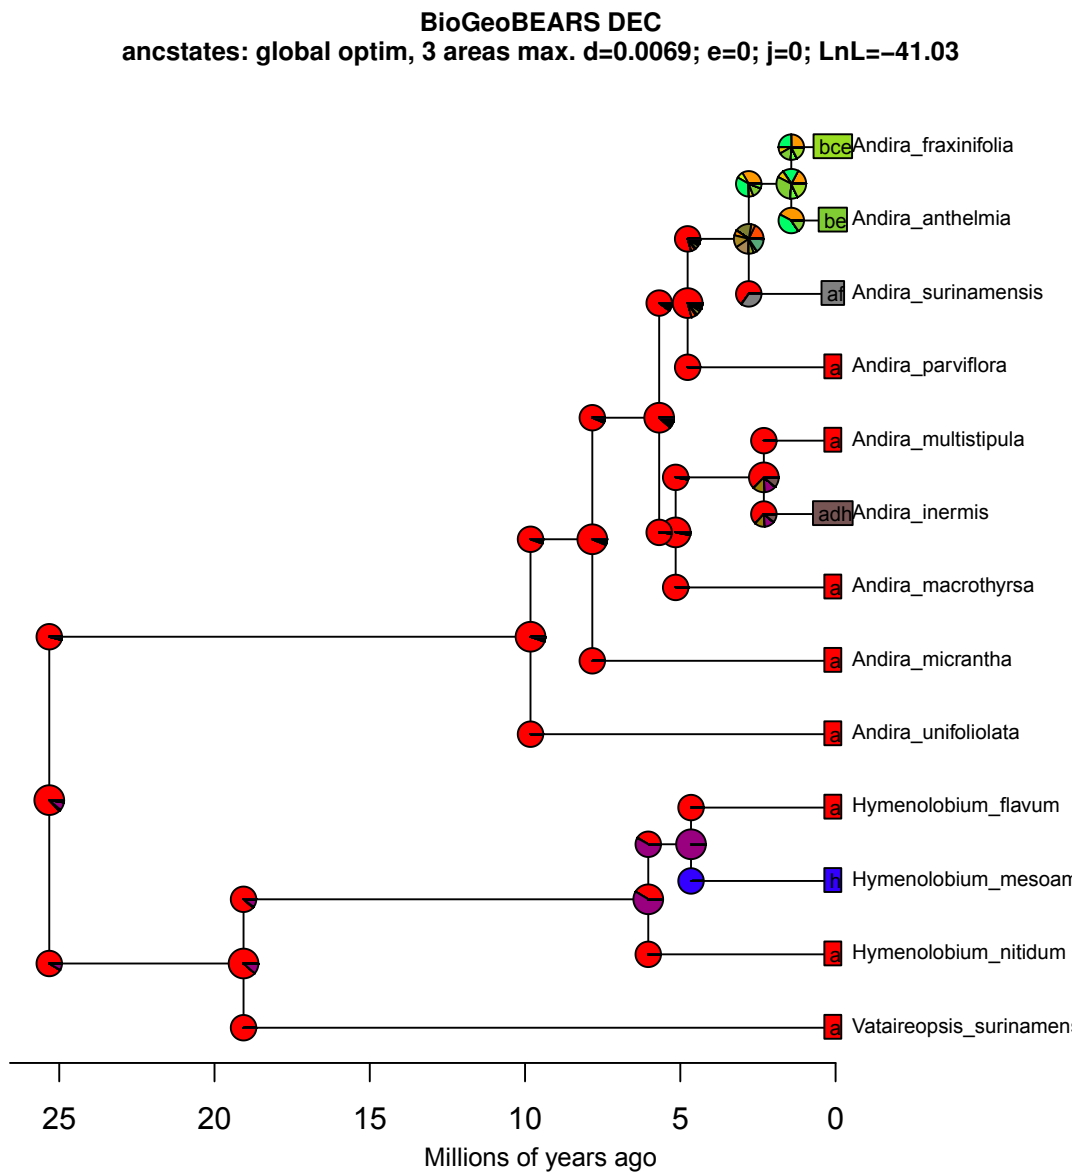

Figure S3: Clades of angiosperms

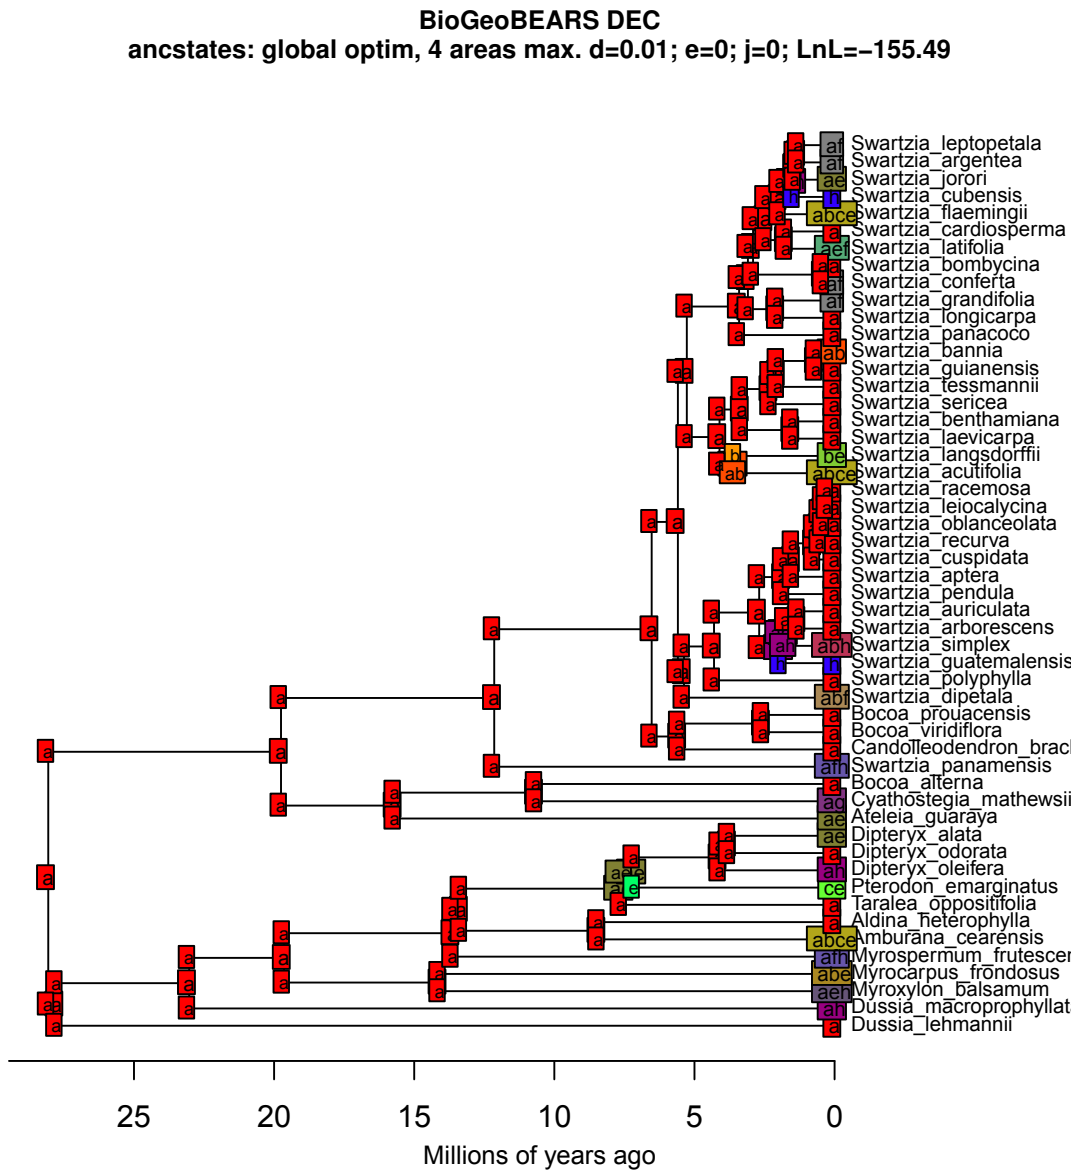

Figure S3: Clades of angiosperms

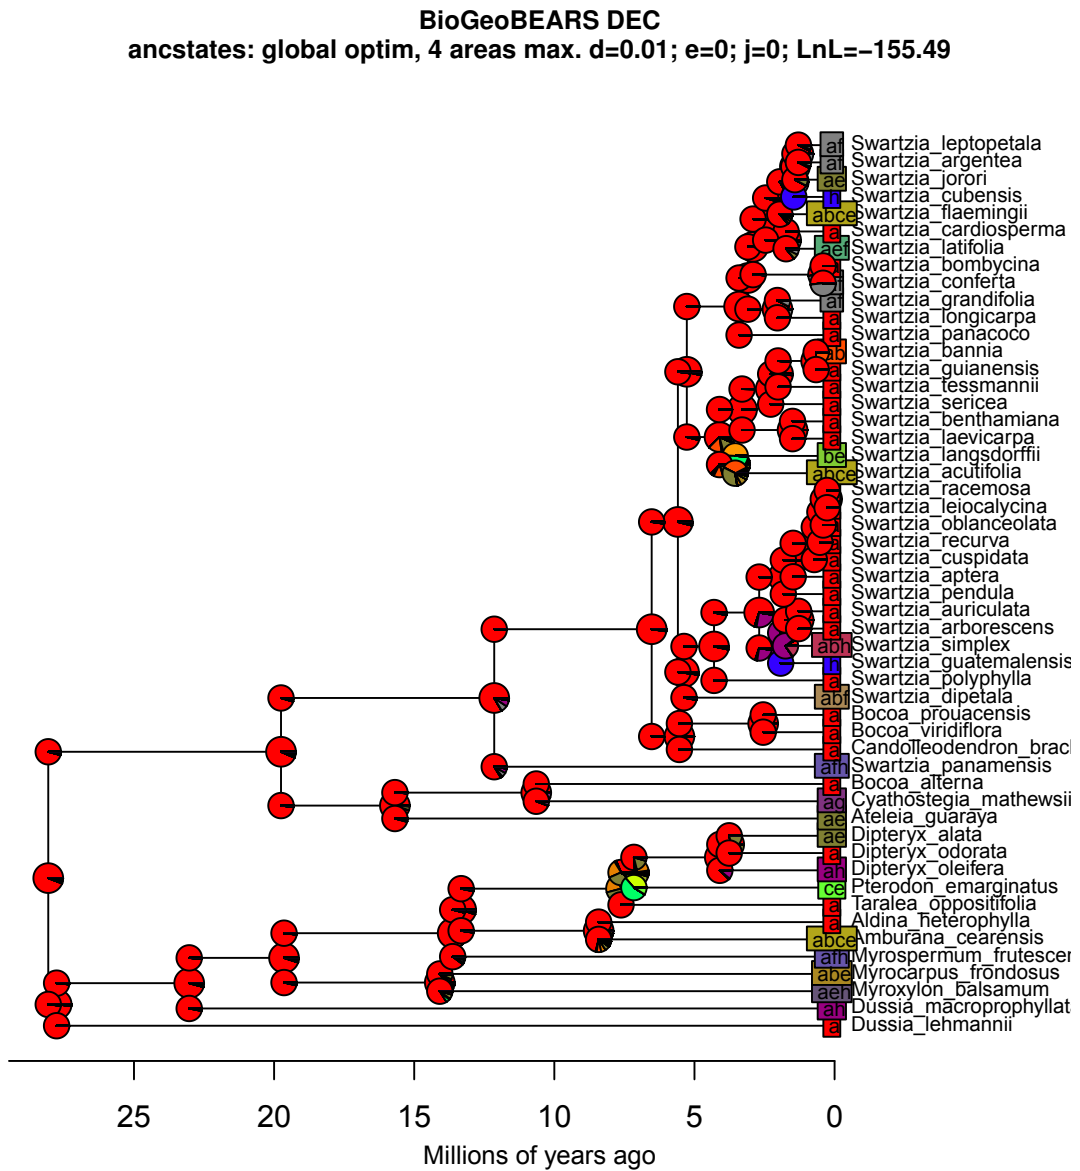

Figure S3: Clades of angiosperms

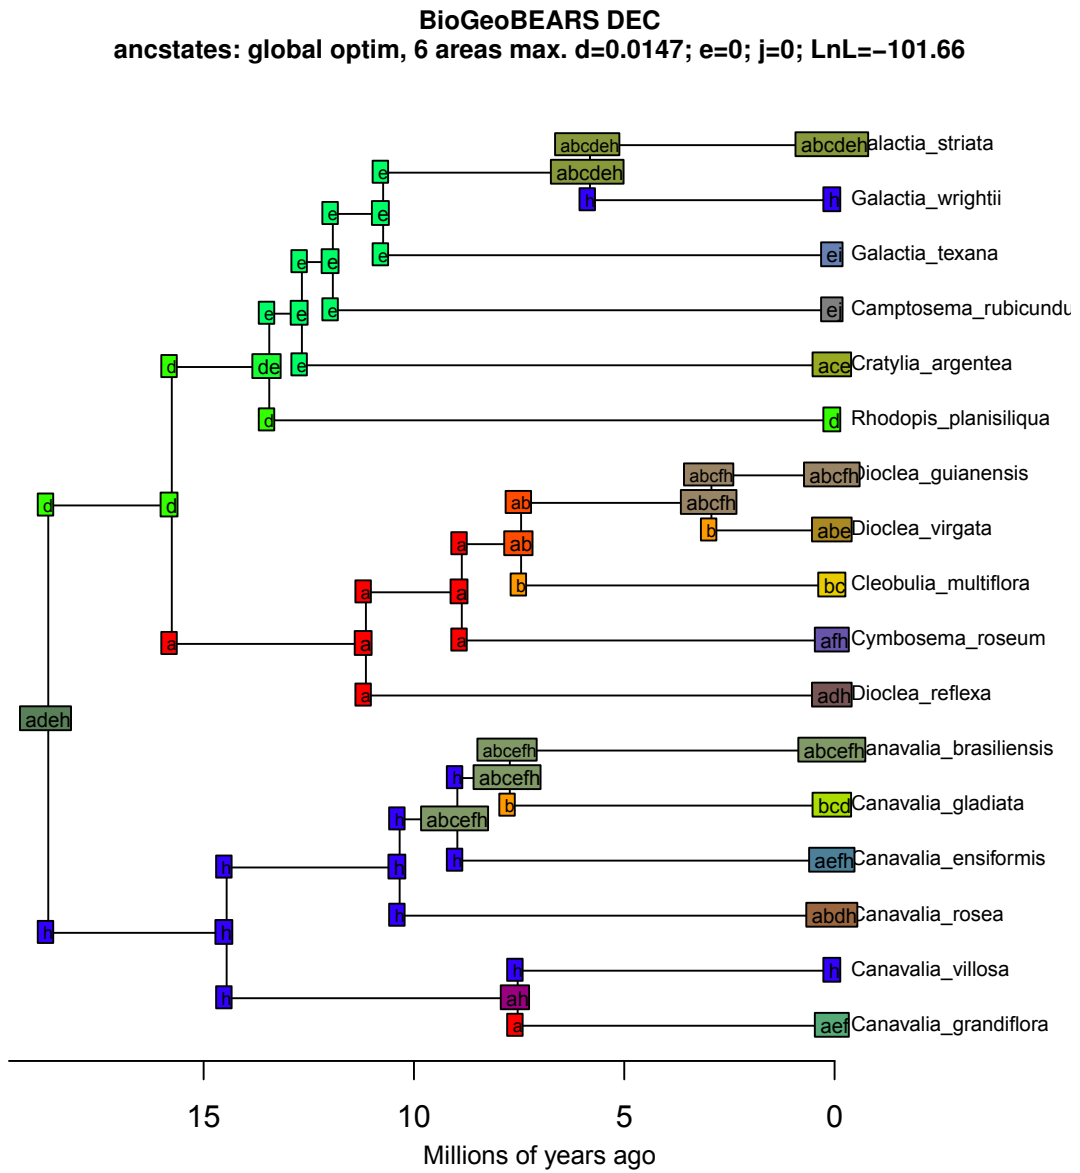

Figure S3: Clades of angiosperms

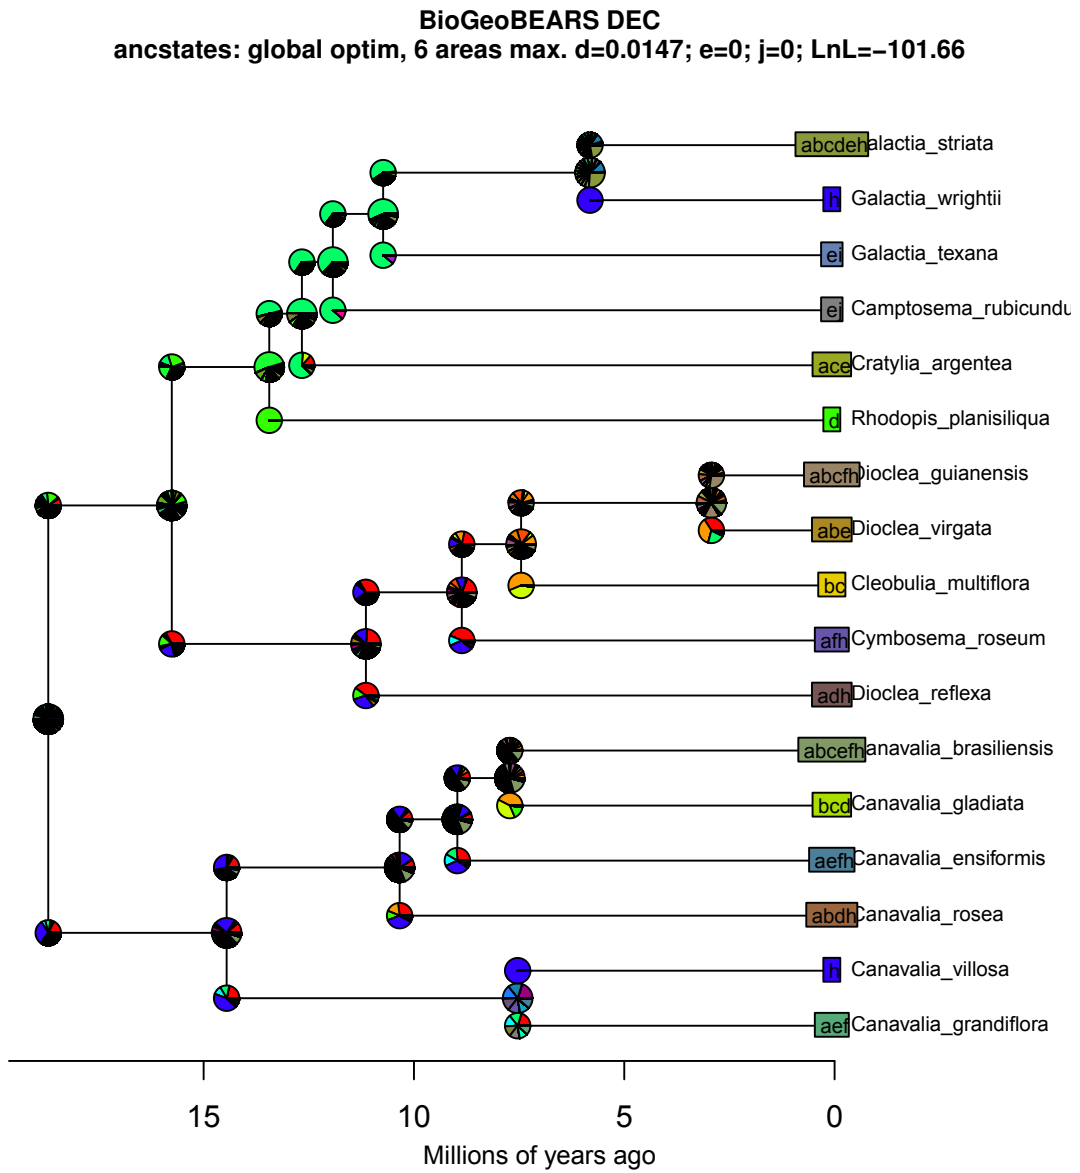

Figure S3: Clades of angiosperms

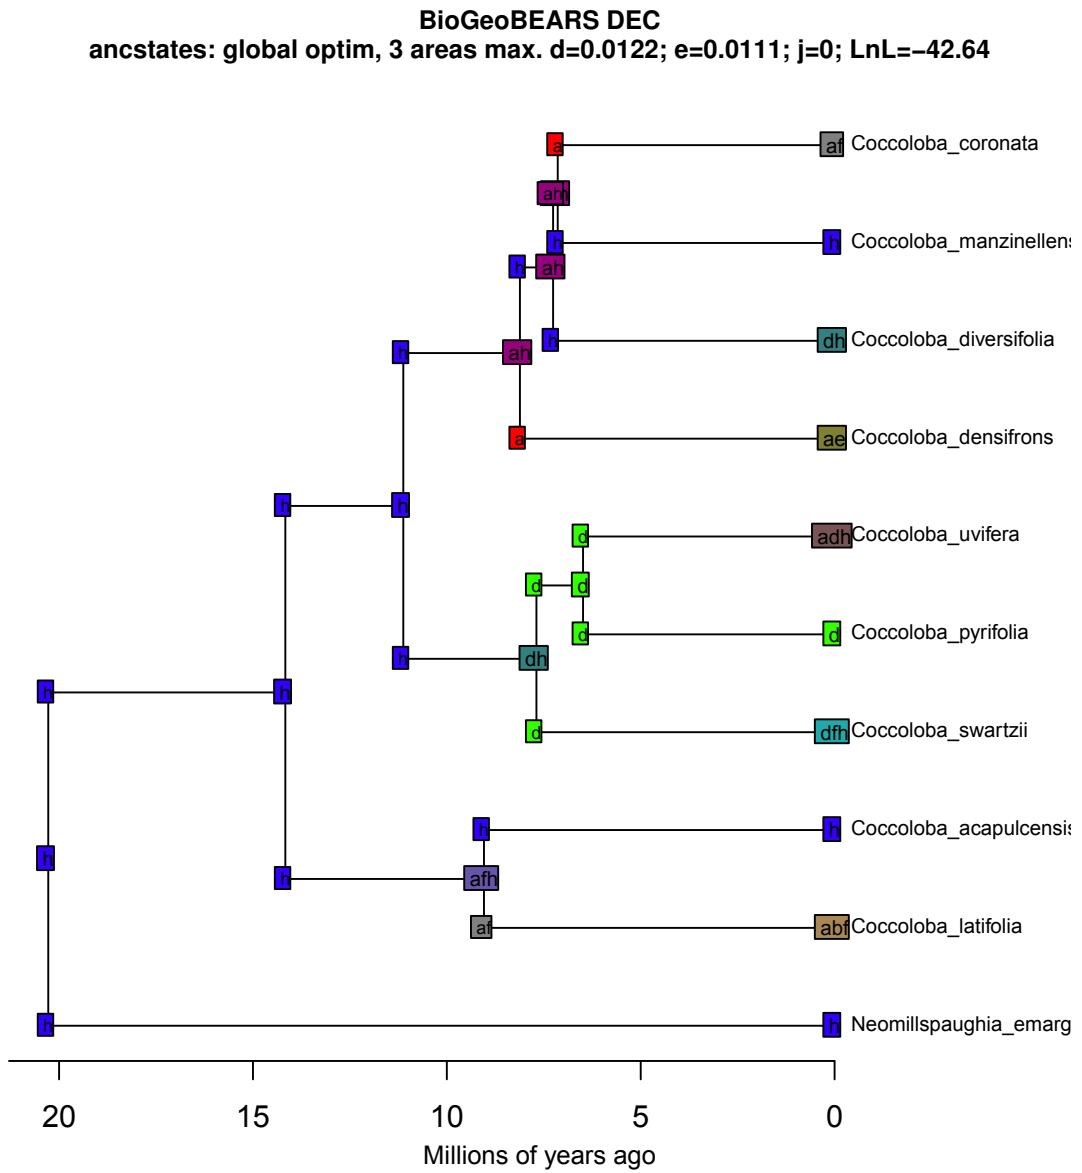

Figure S3: Clades of angiosperms

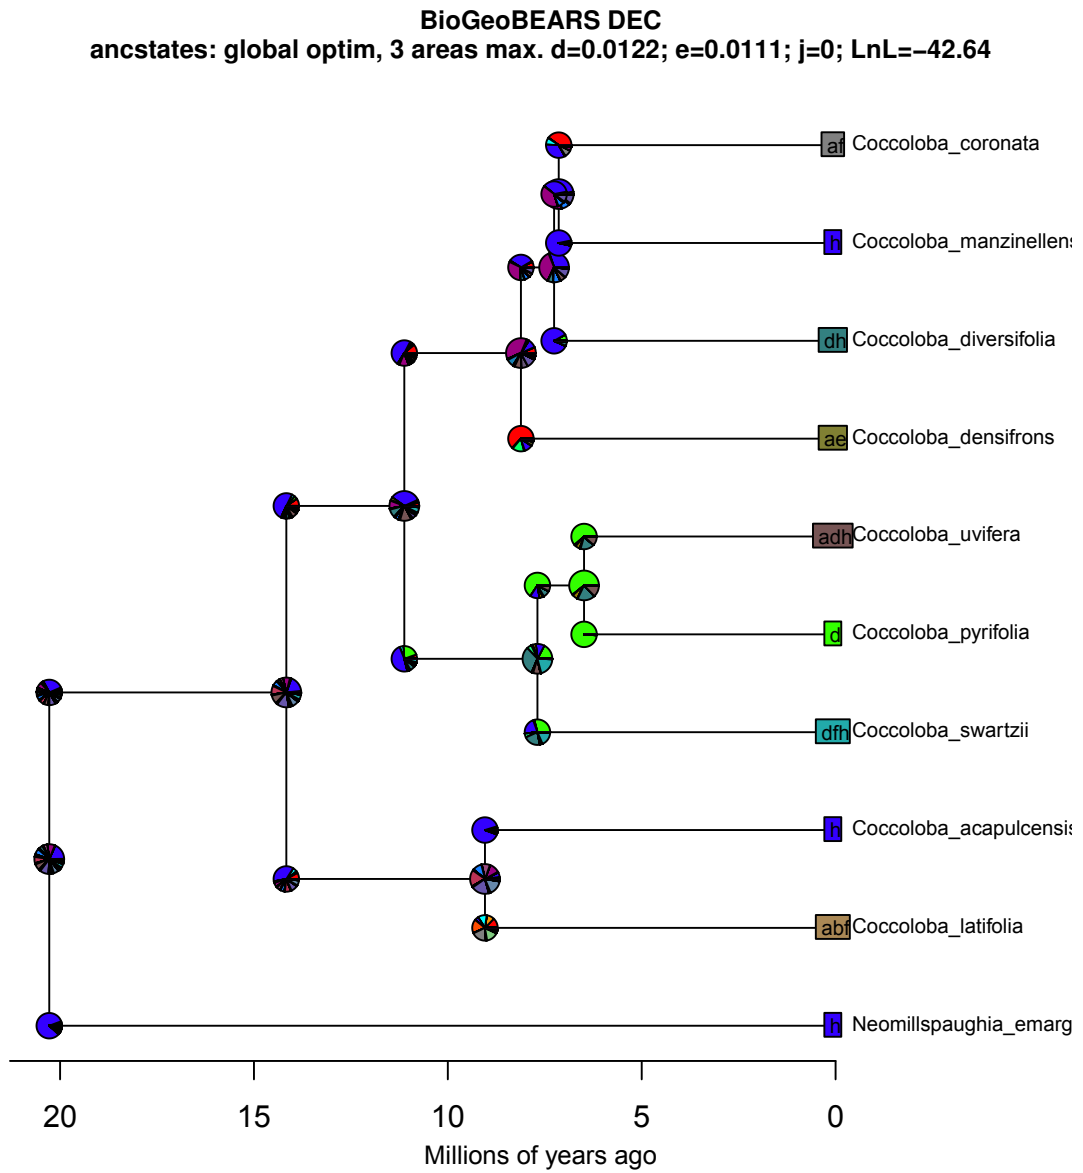

Figure S3: Clades of angiosperms

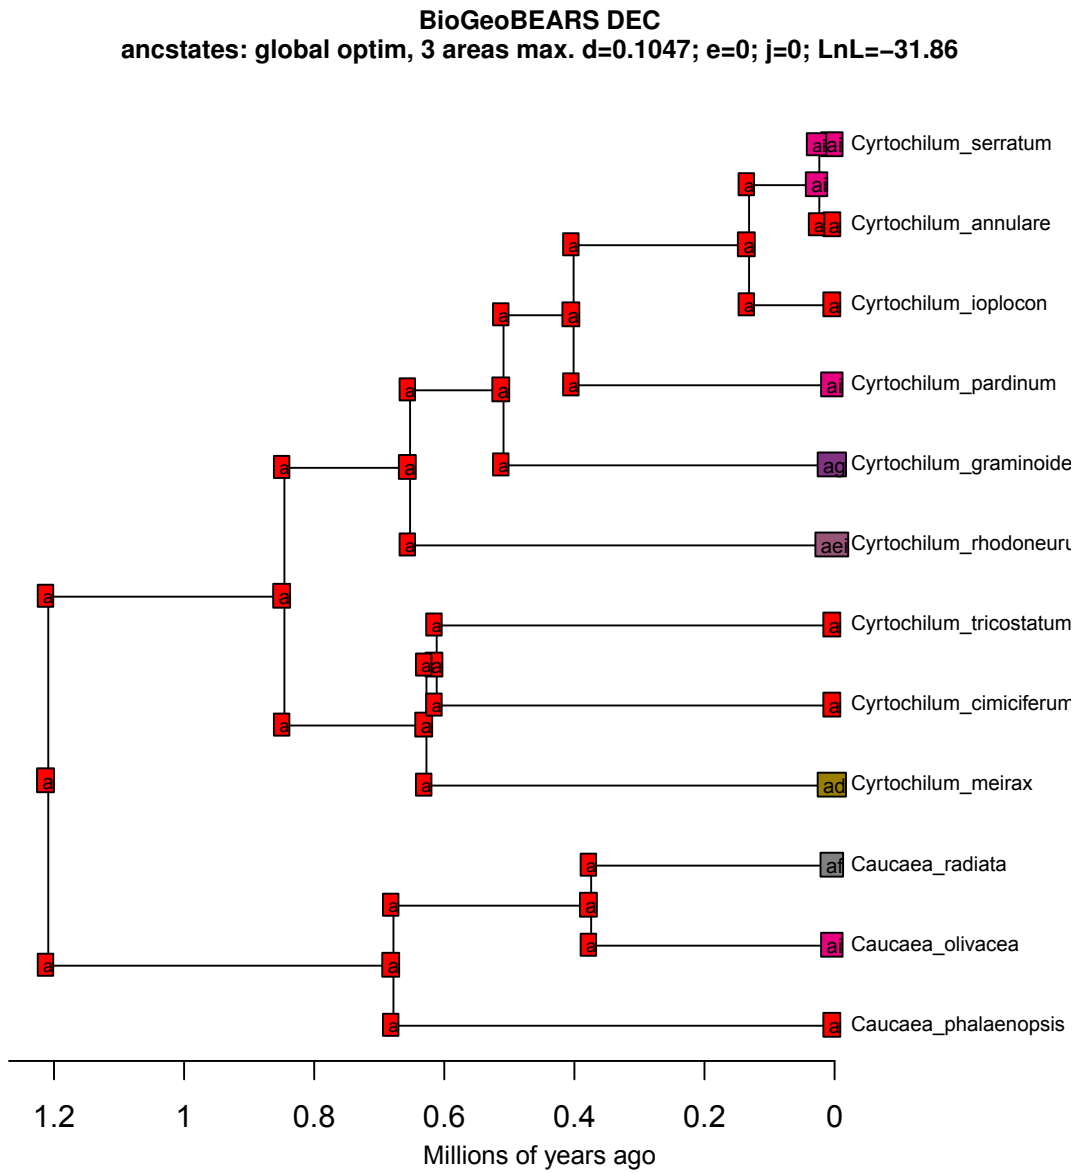



Figure S3: Clades of angiosperms

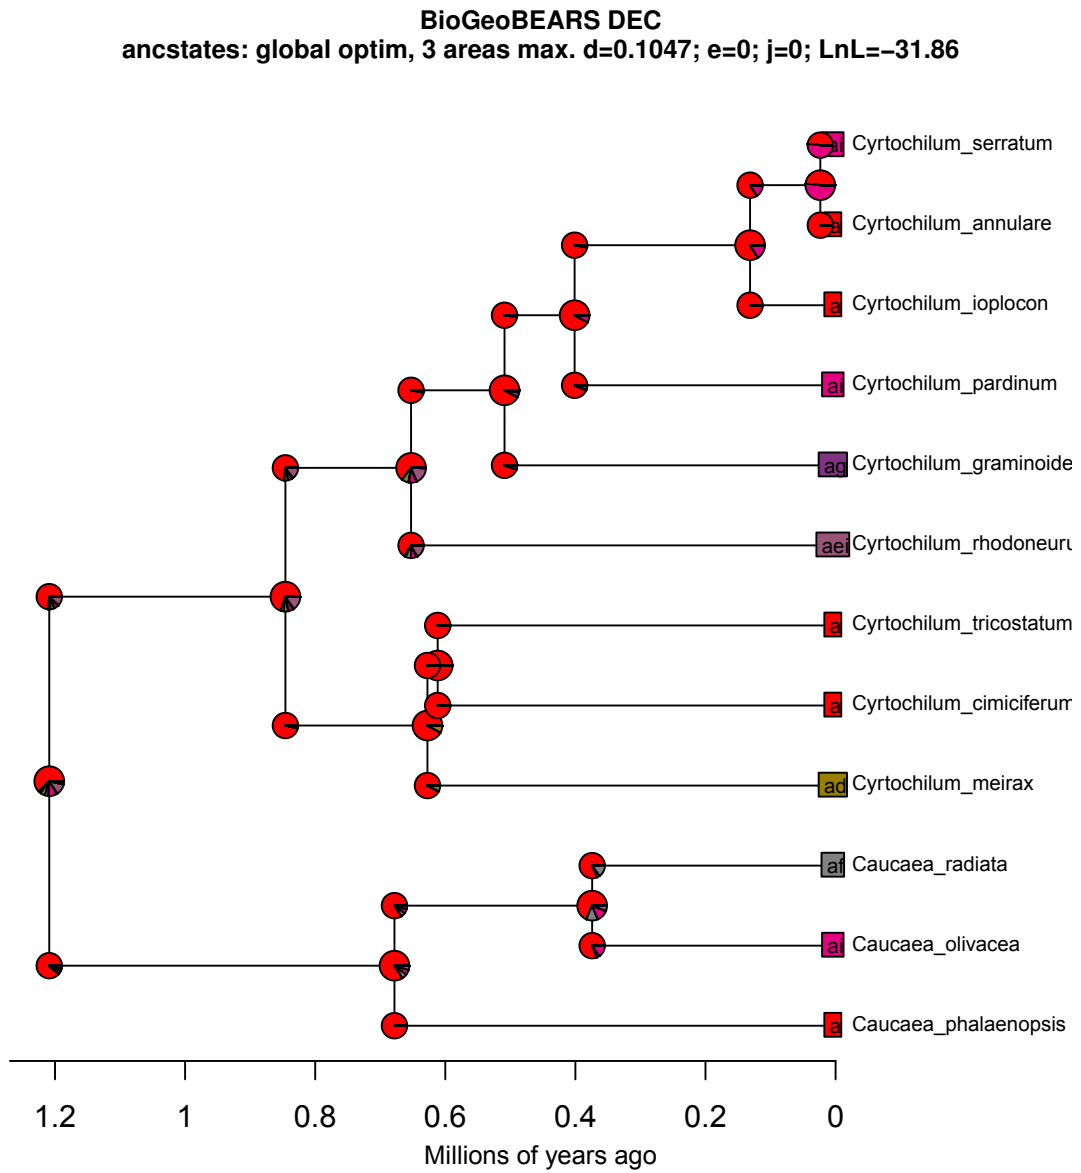

Figure S3: Clades of angiosperms

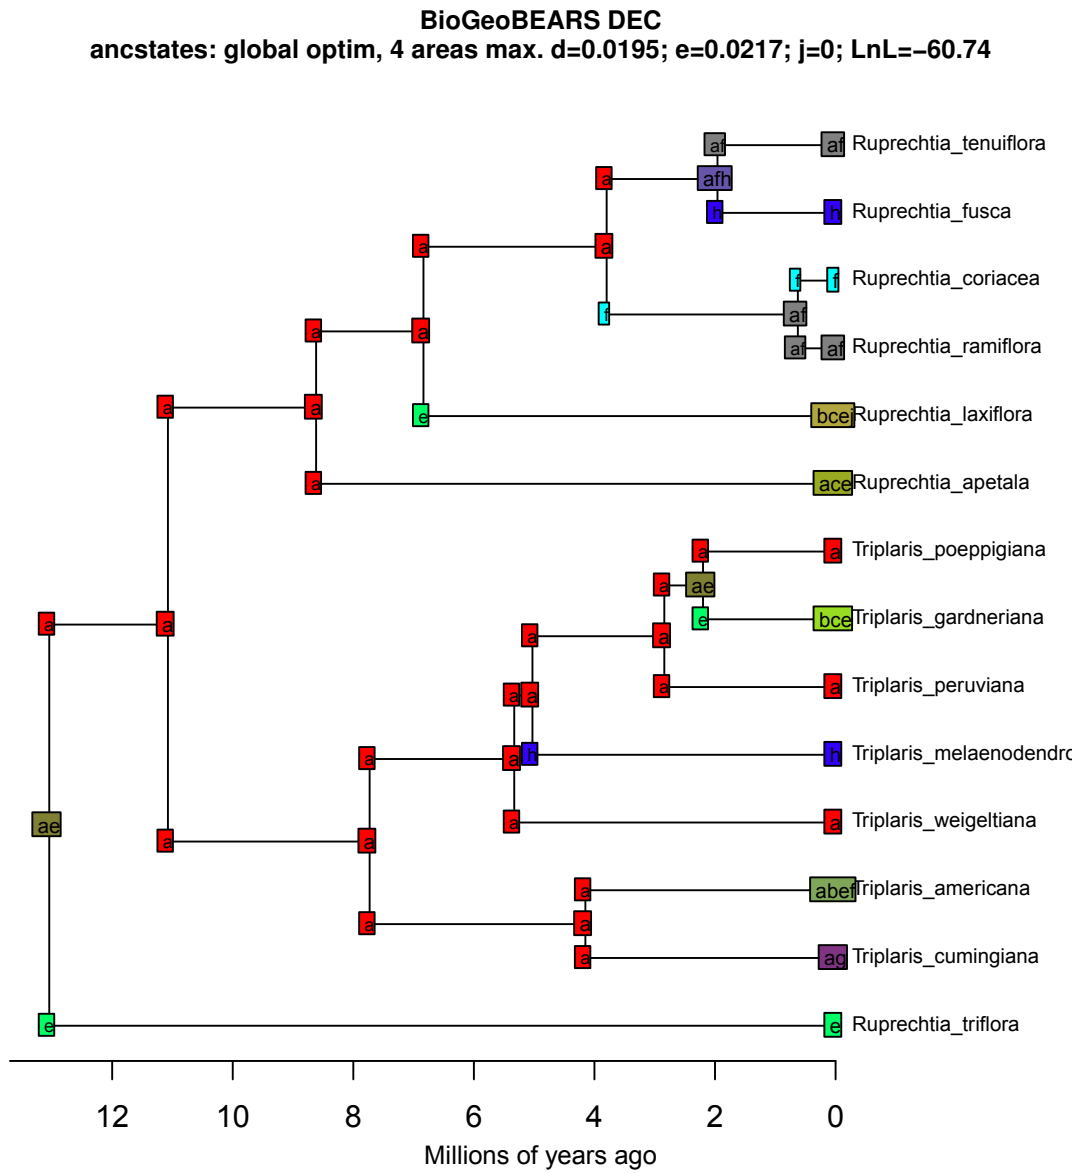

Figure S3: Clades of angiosperms

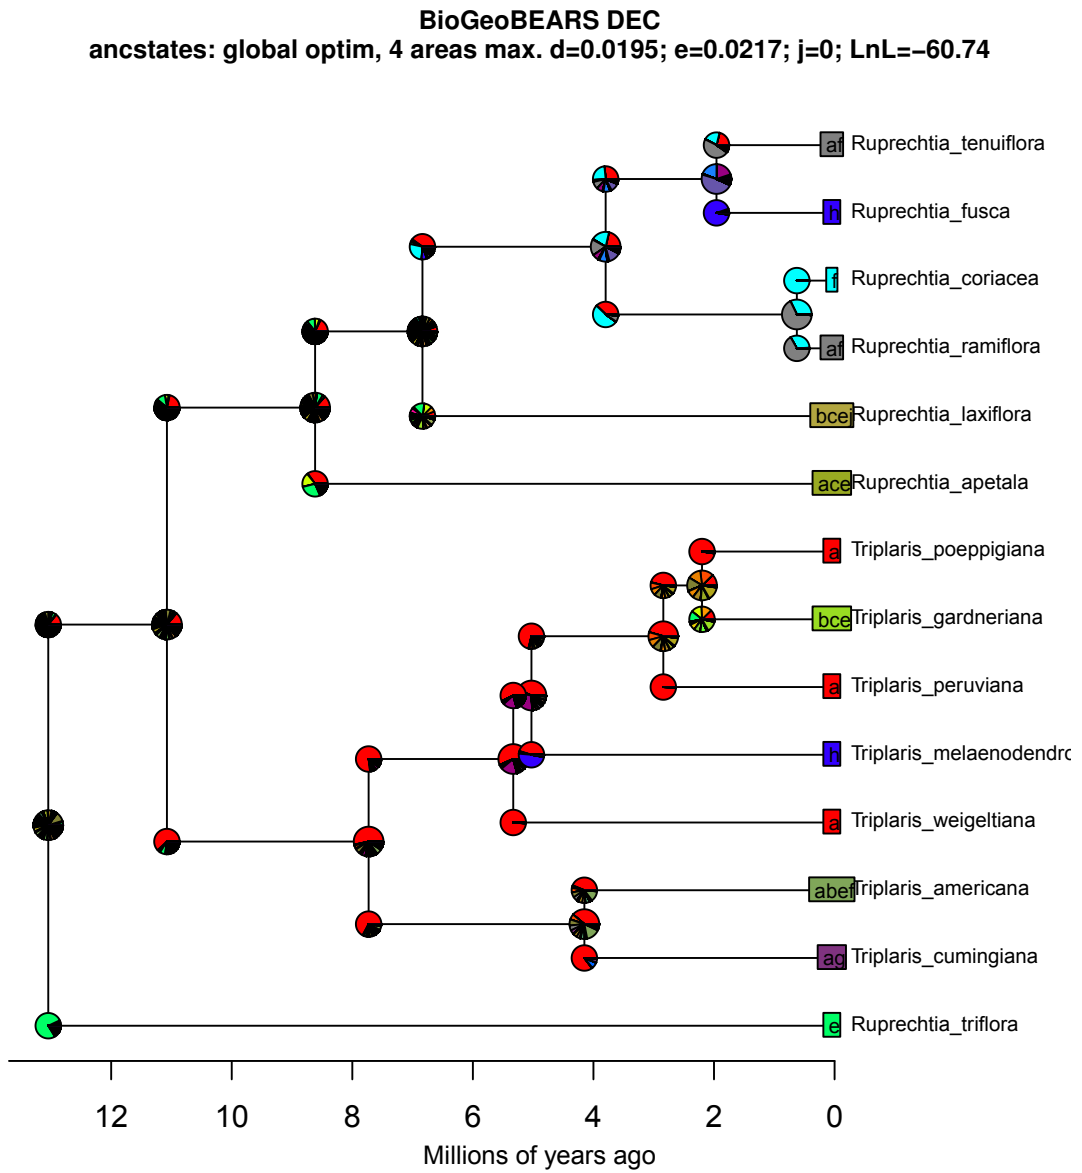

Figure S3: Clades of angiosperms

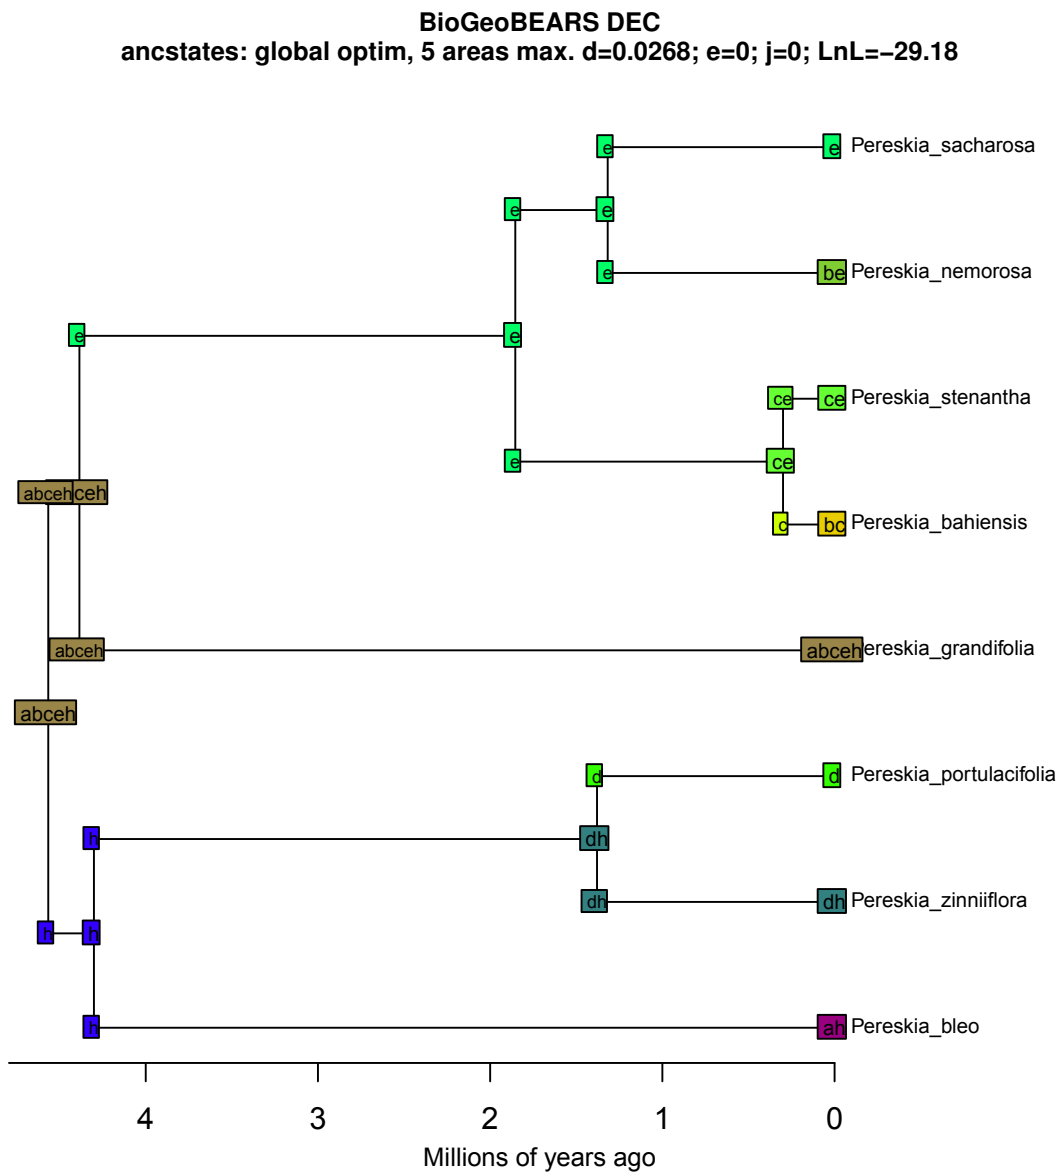

Figure S3: Clades of angiosperms

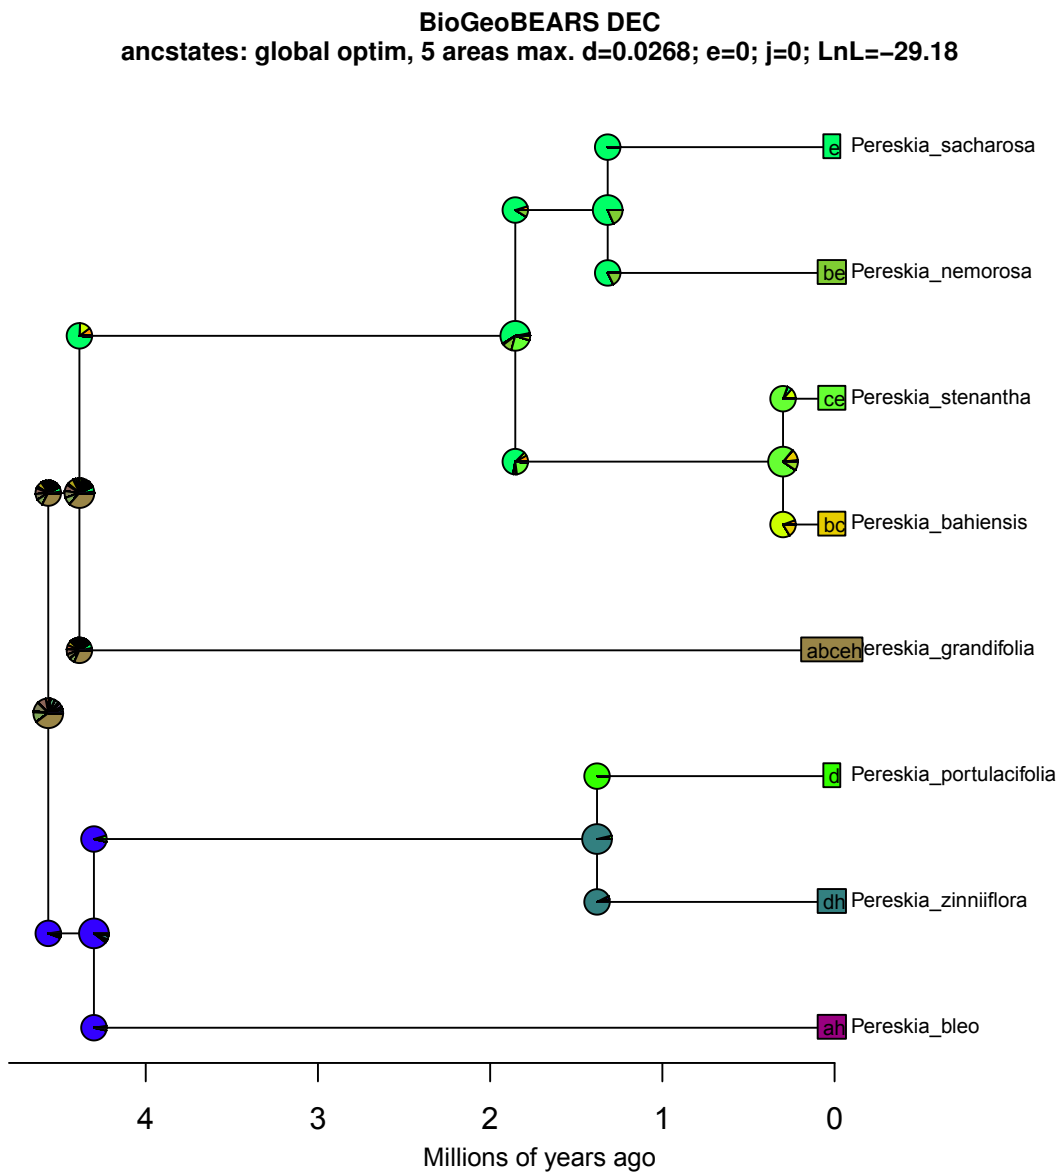

Figure S3: Clades of angiosperms

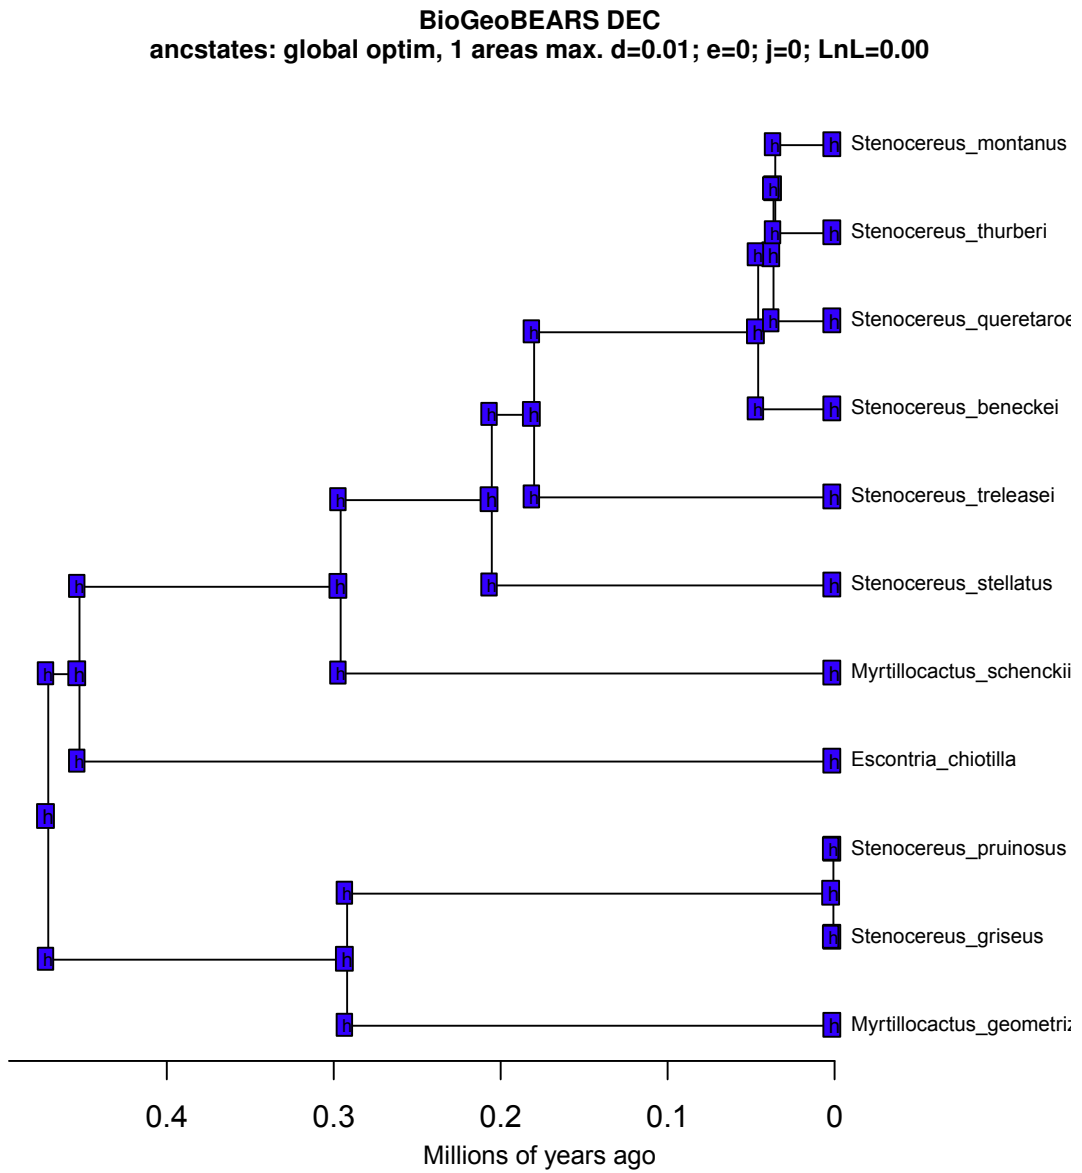

Figure S3: Clades of angiosperms

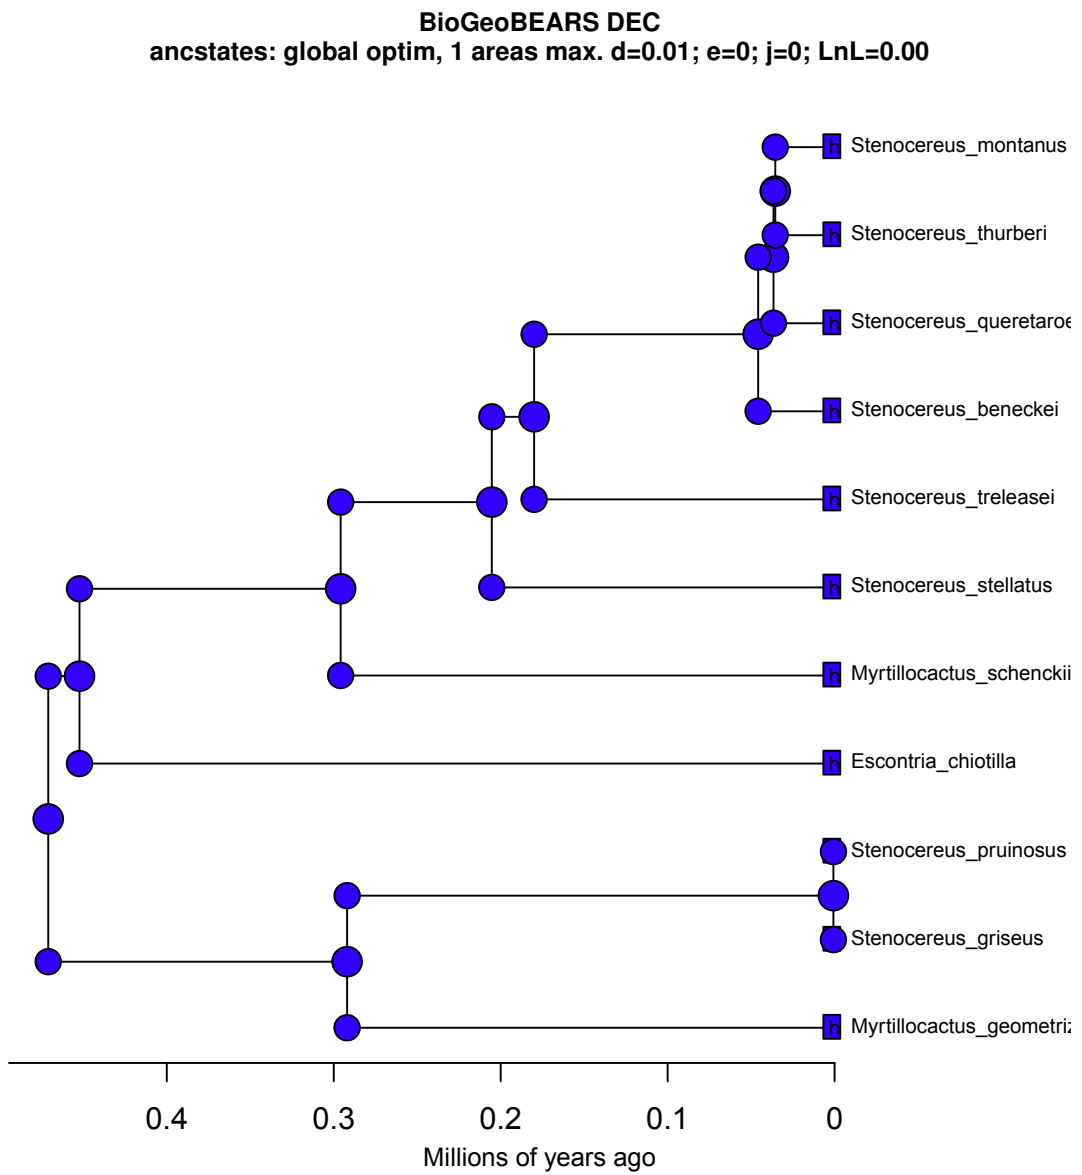

Figure S3: Clades of angiosperms

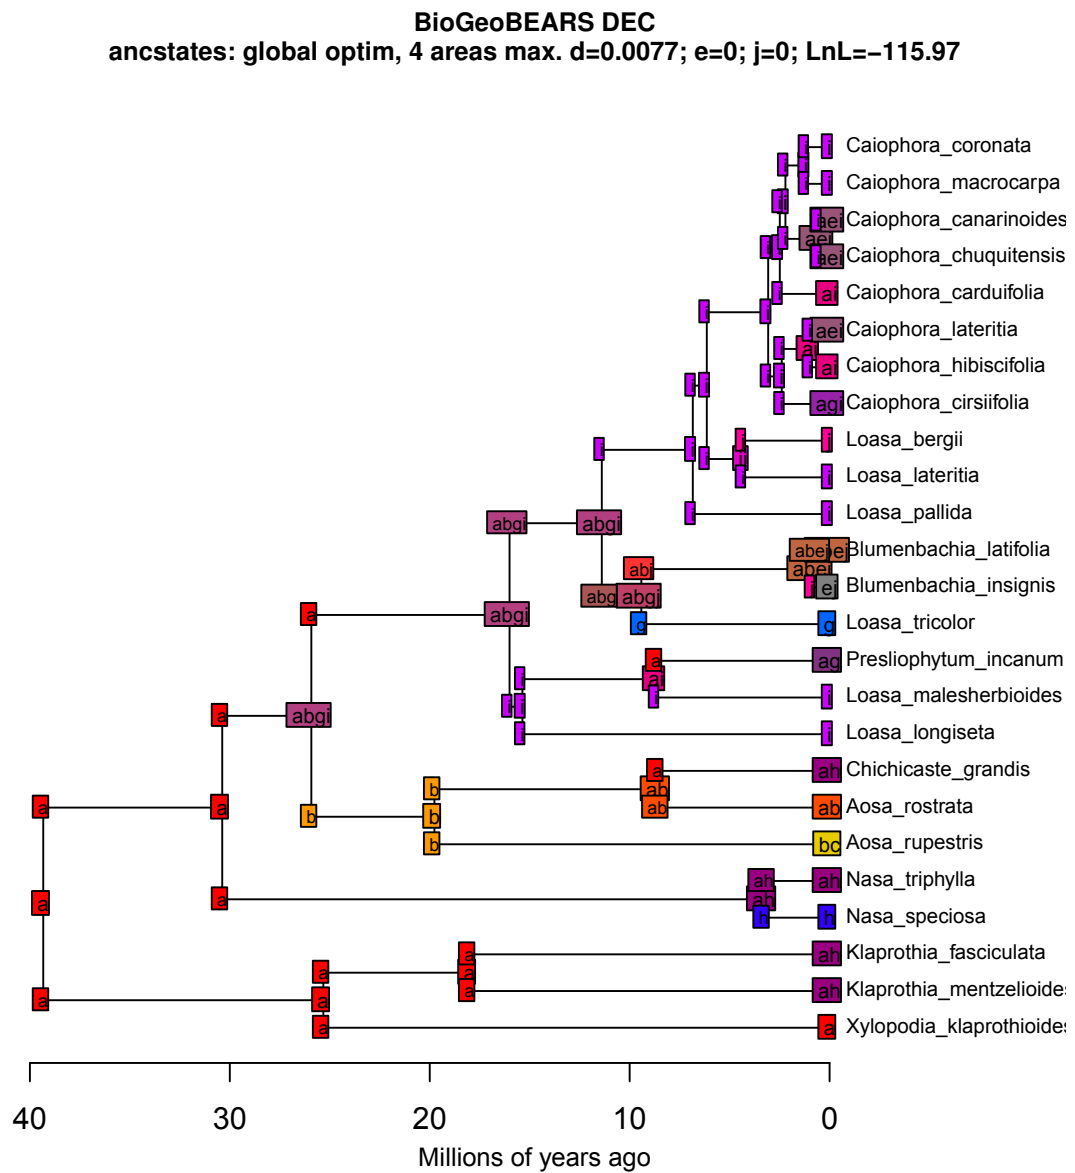



Figure S3: Clades of angiosperms

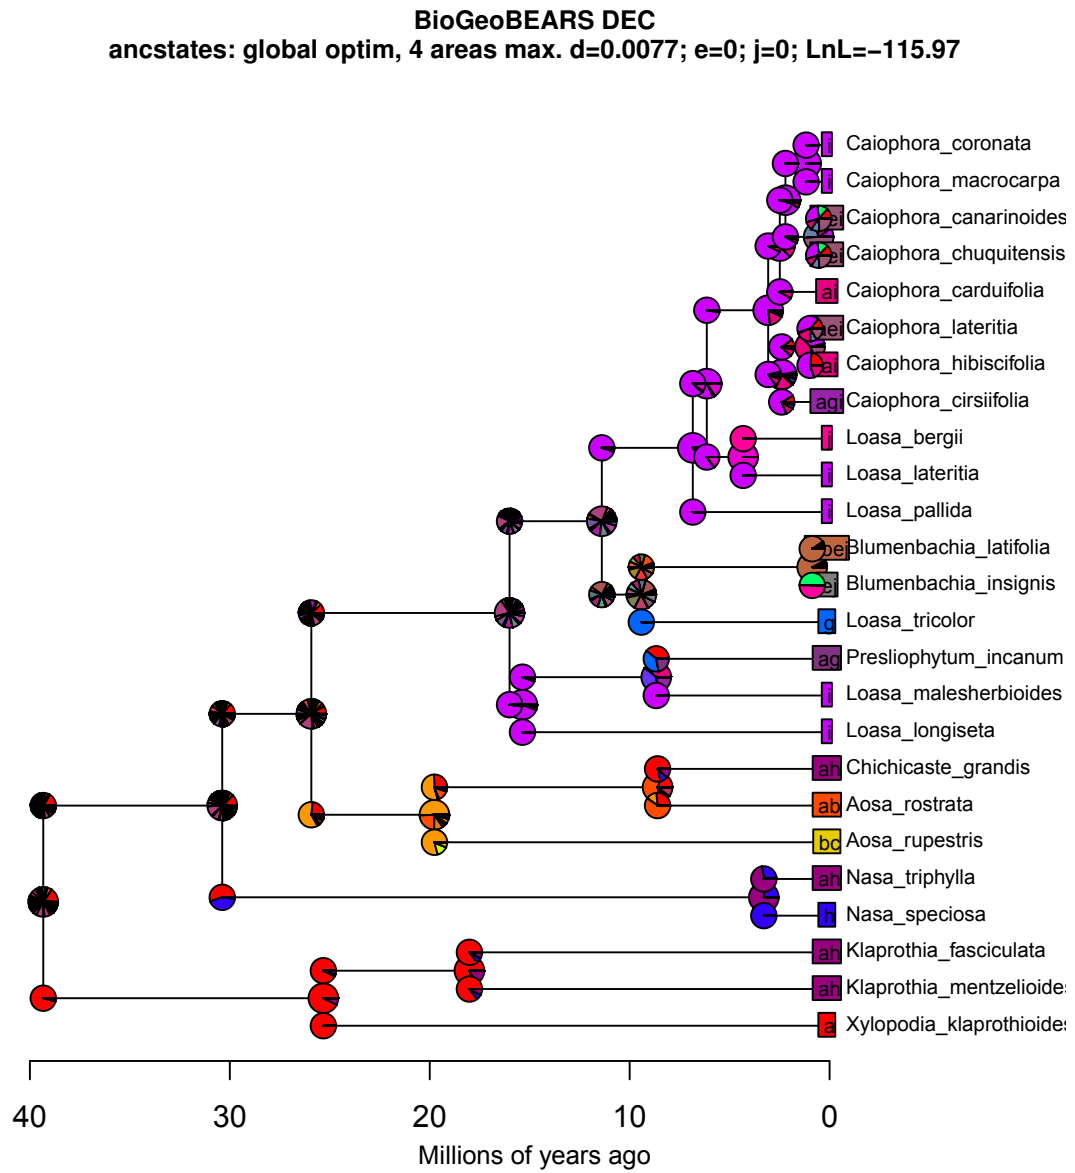

Figure S3: Clades of angiosperms

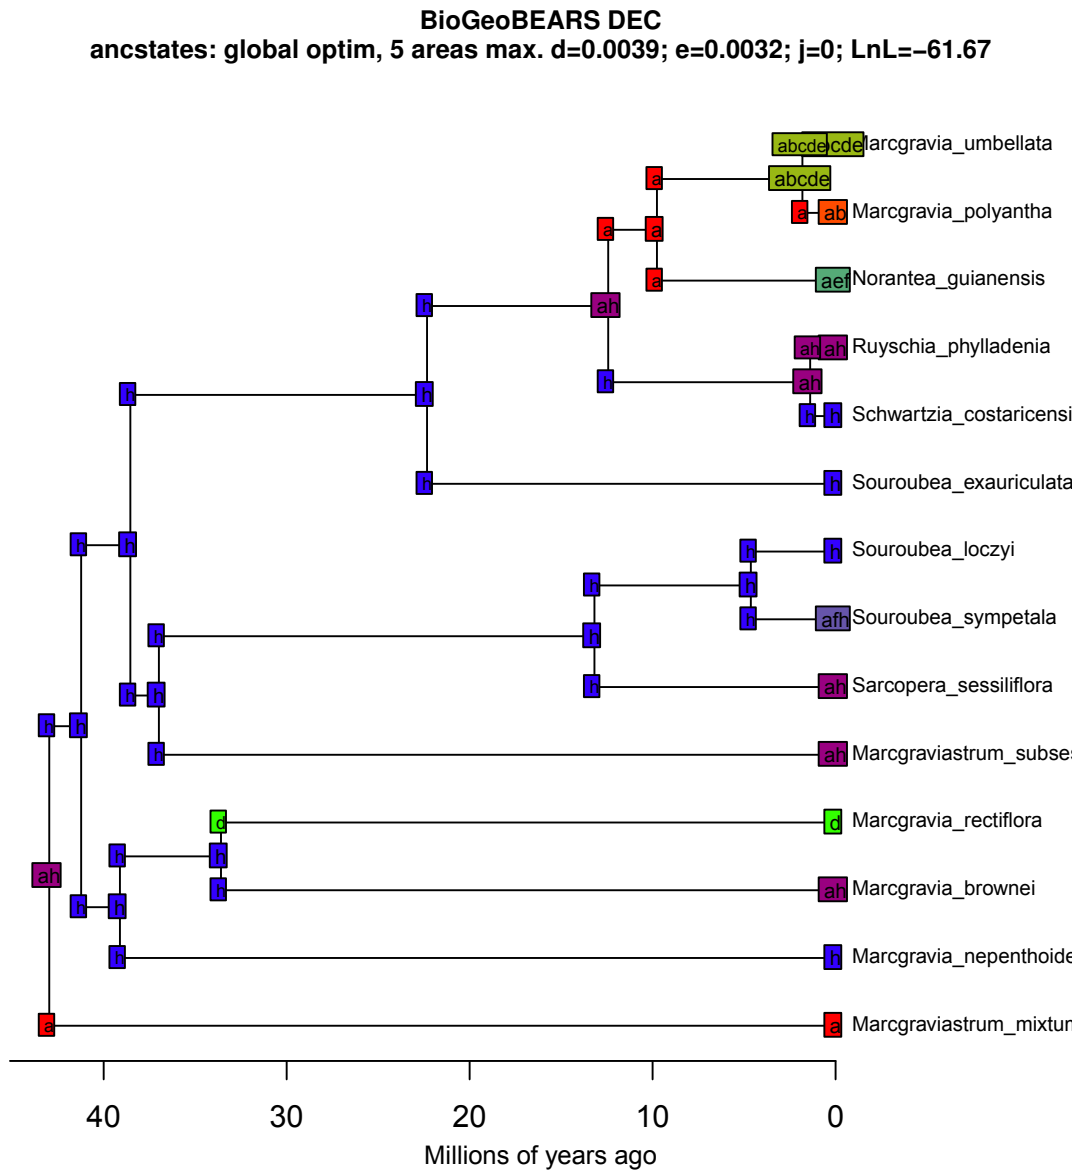

Figure S3: Clades of angiosperms

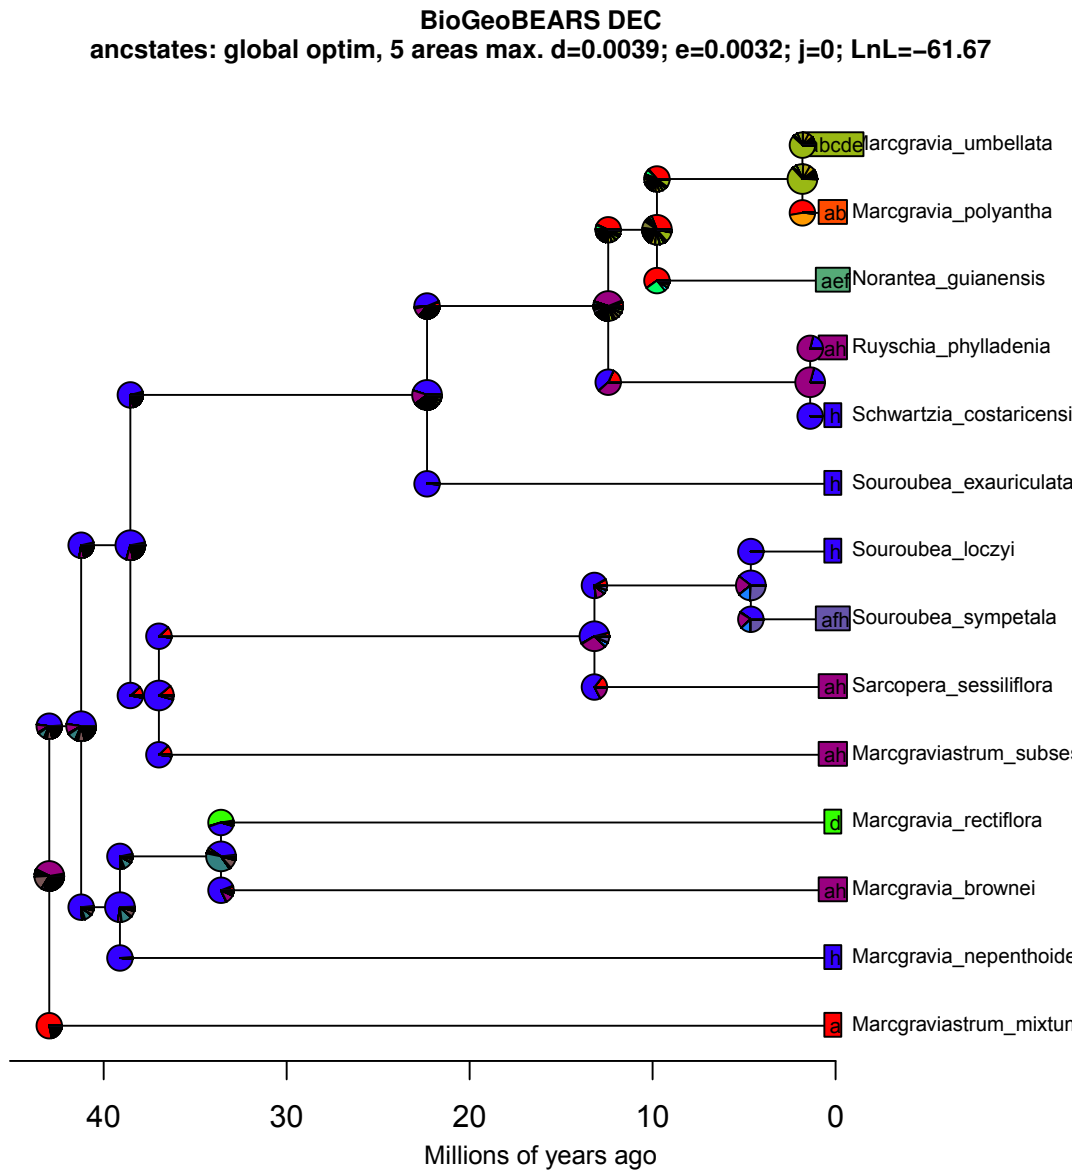

Figure S3: Clades of angiosperms

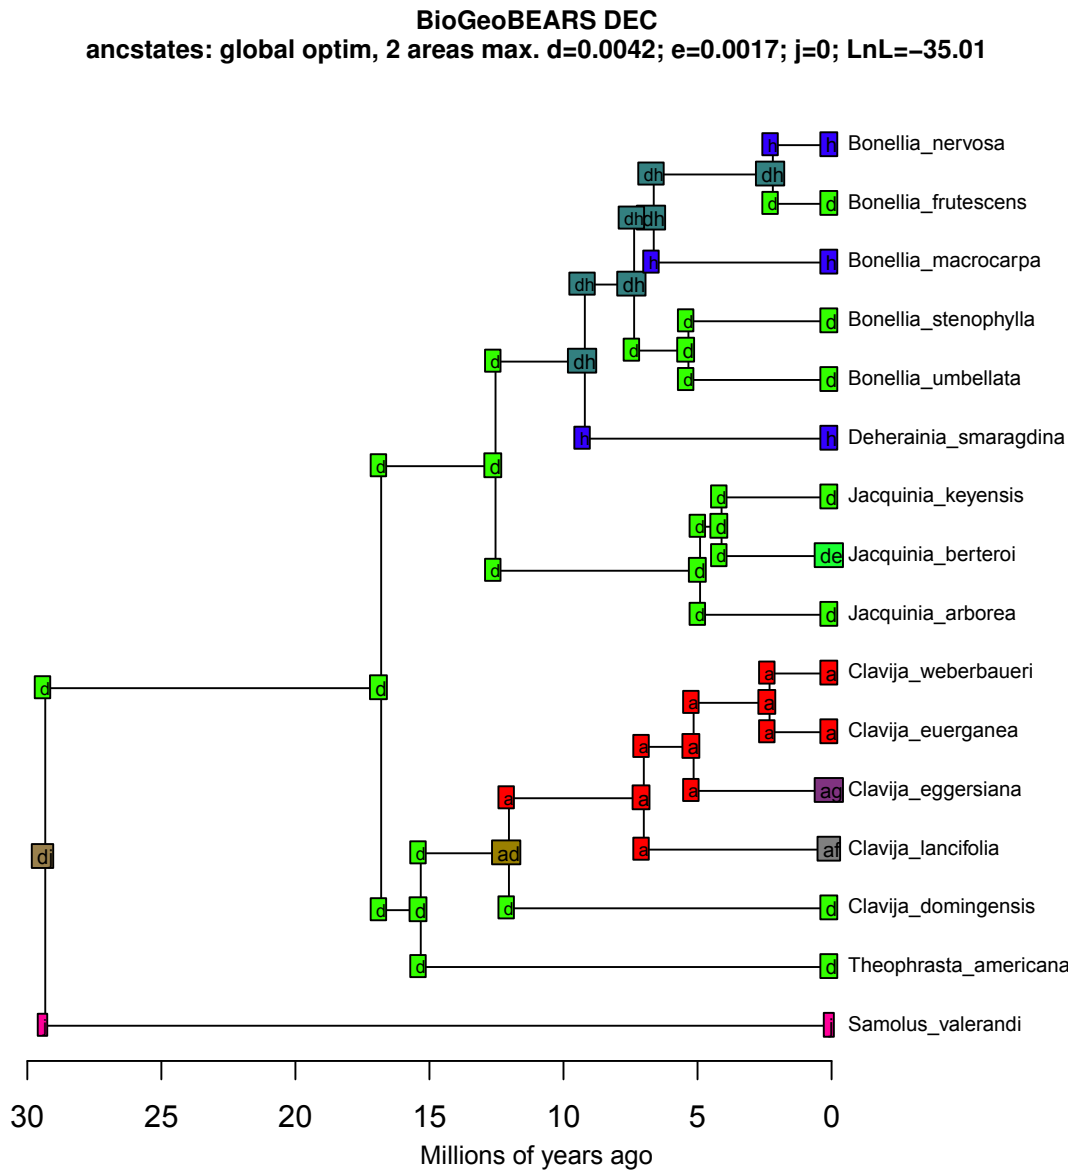

Figure S3: Clades of angiosperms

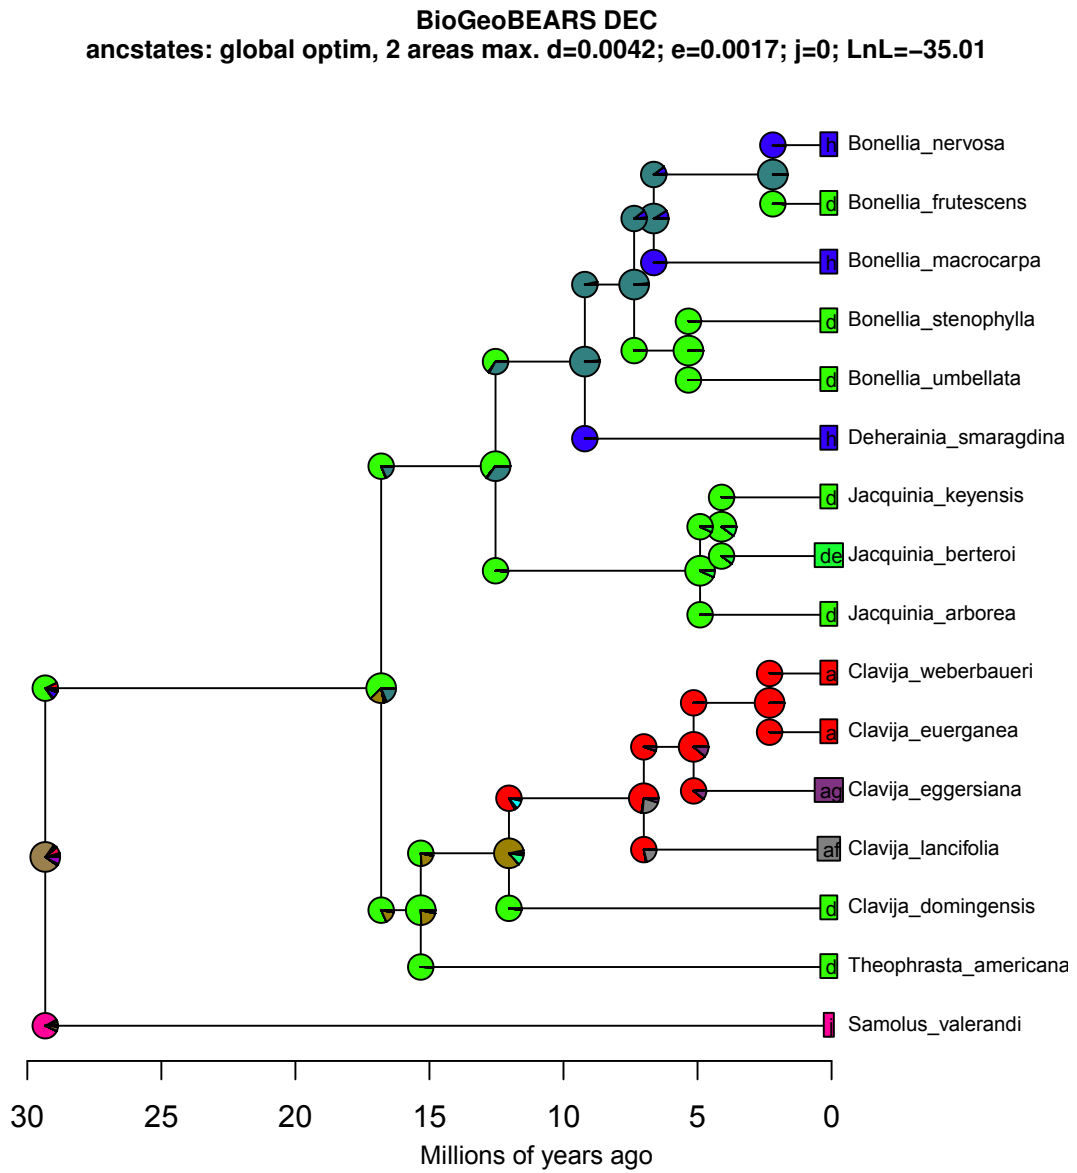

Figure S3: Clades of angiosperms

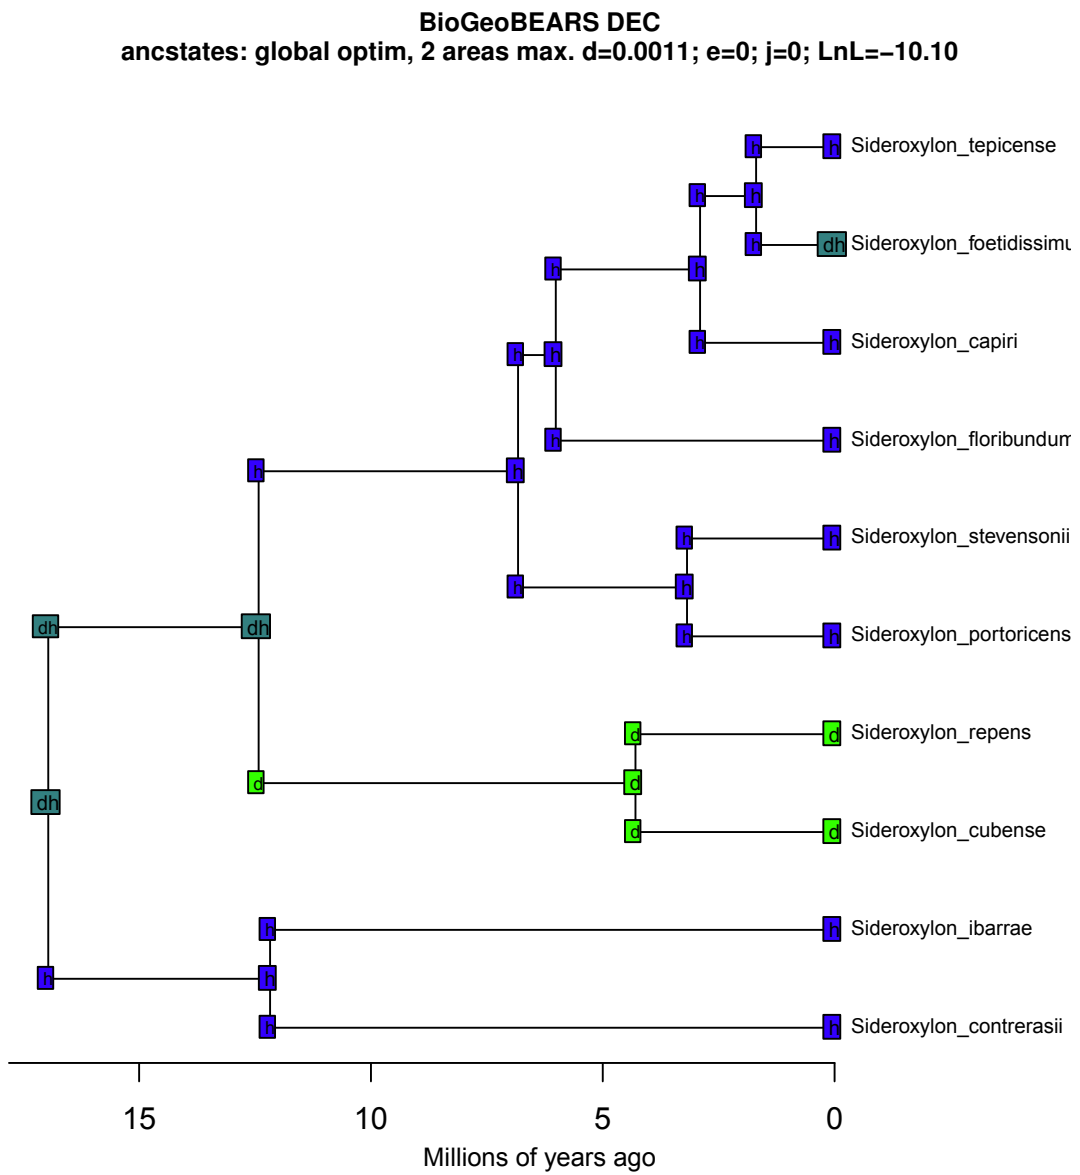

Figure S3: Clades of angiosperms

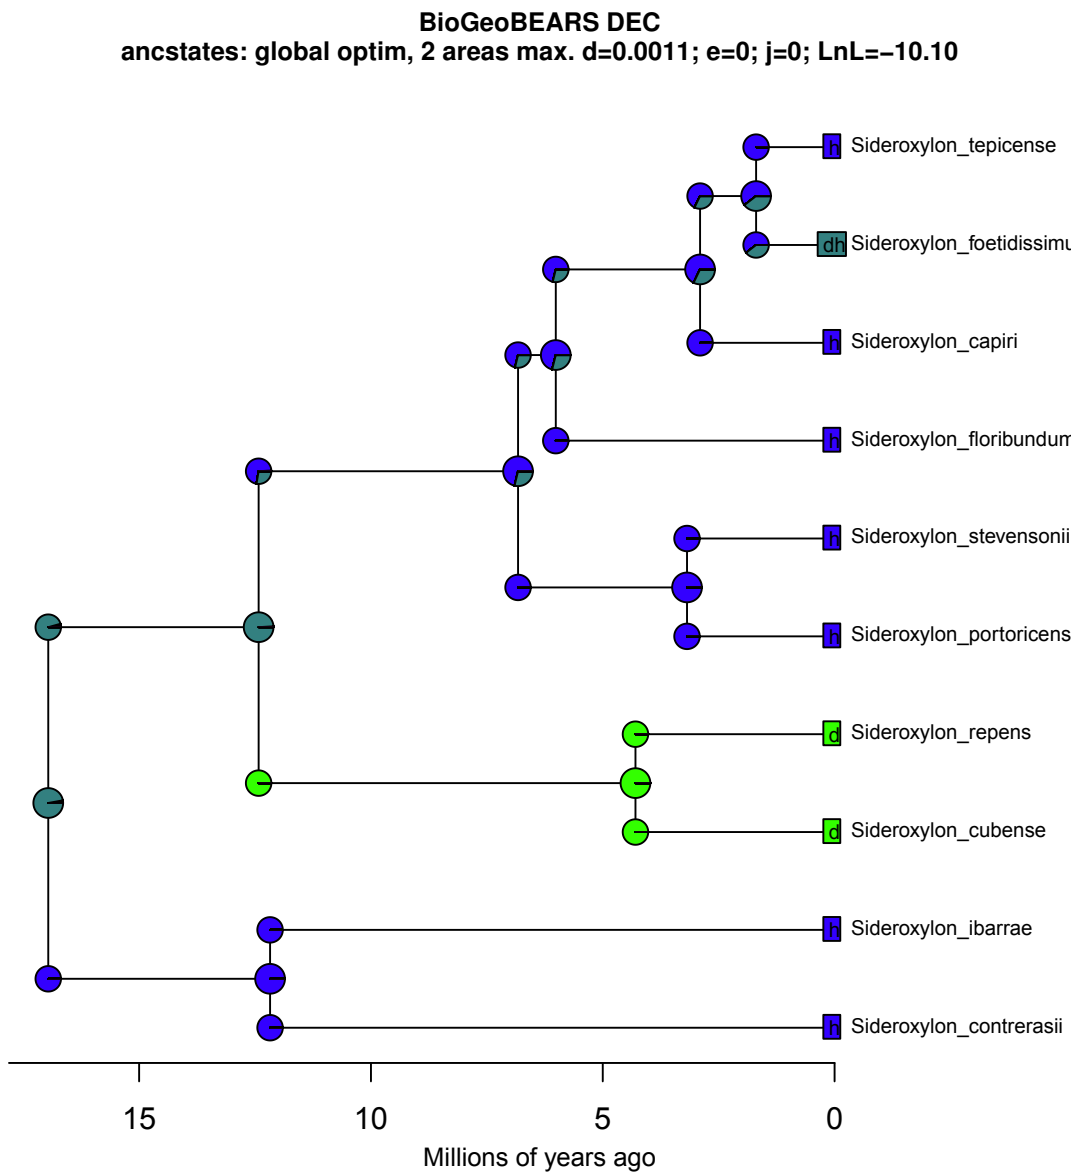

Figure S3: Clades of angiosperms

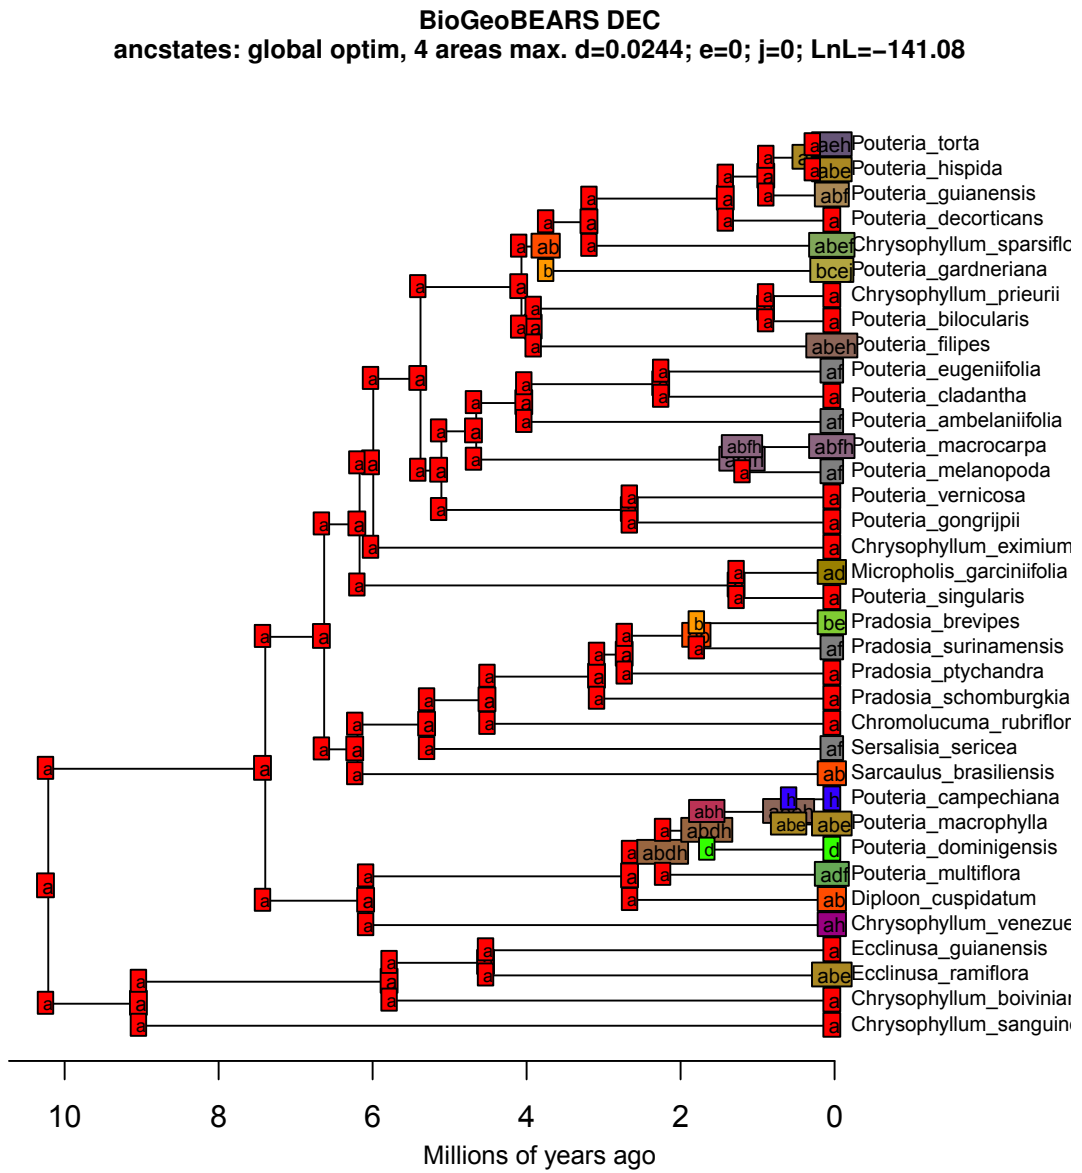



Figure S3: Clades of angiosperms

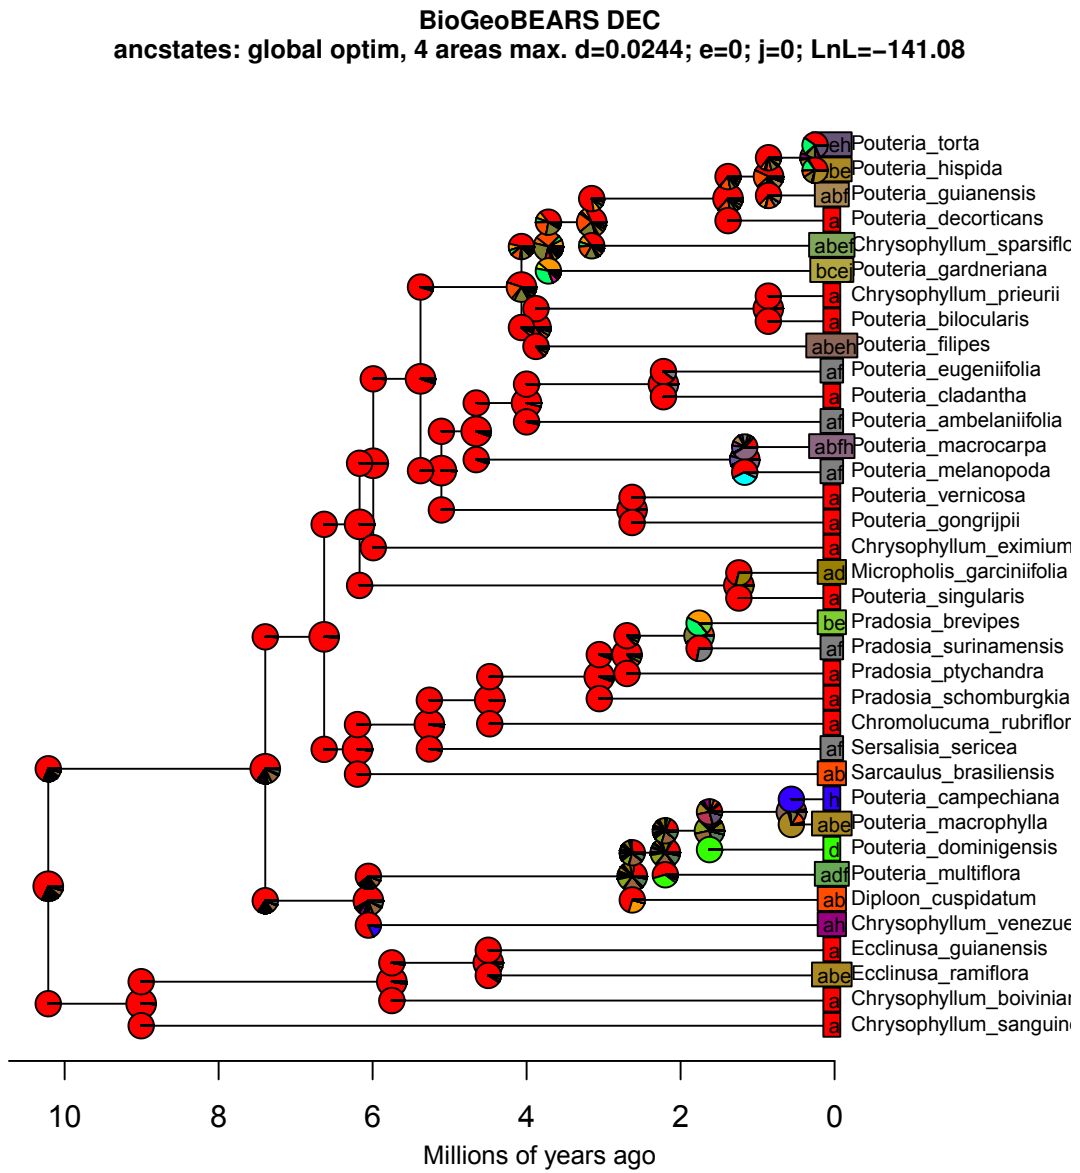

Figure S3: Clades of angiosperms

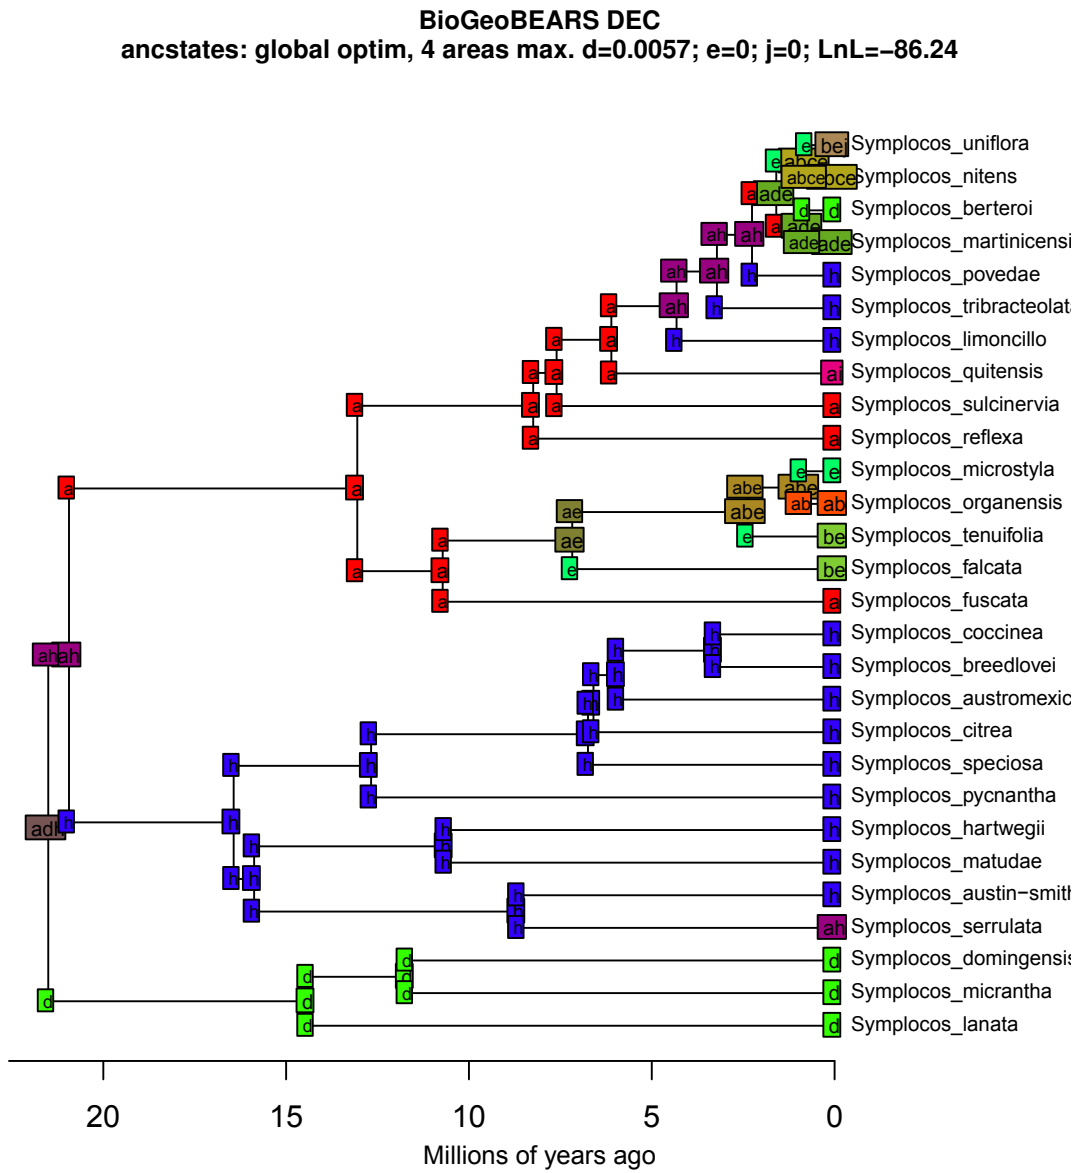

Figure S3: Clades of angiosperms

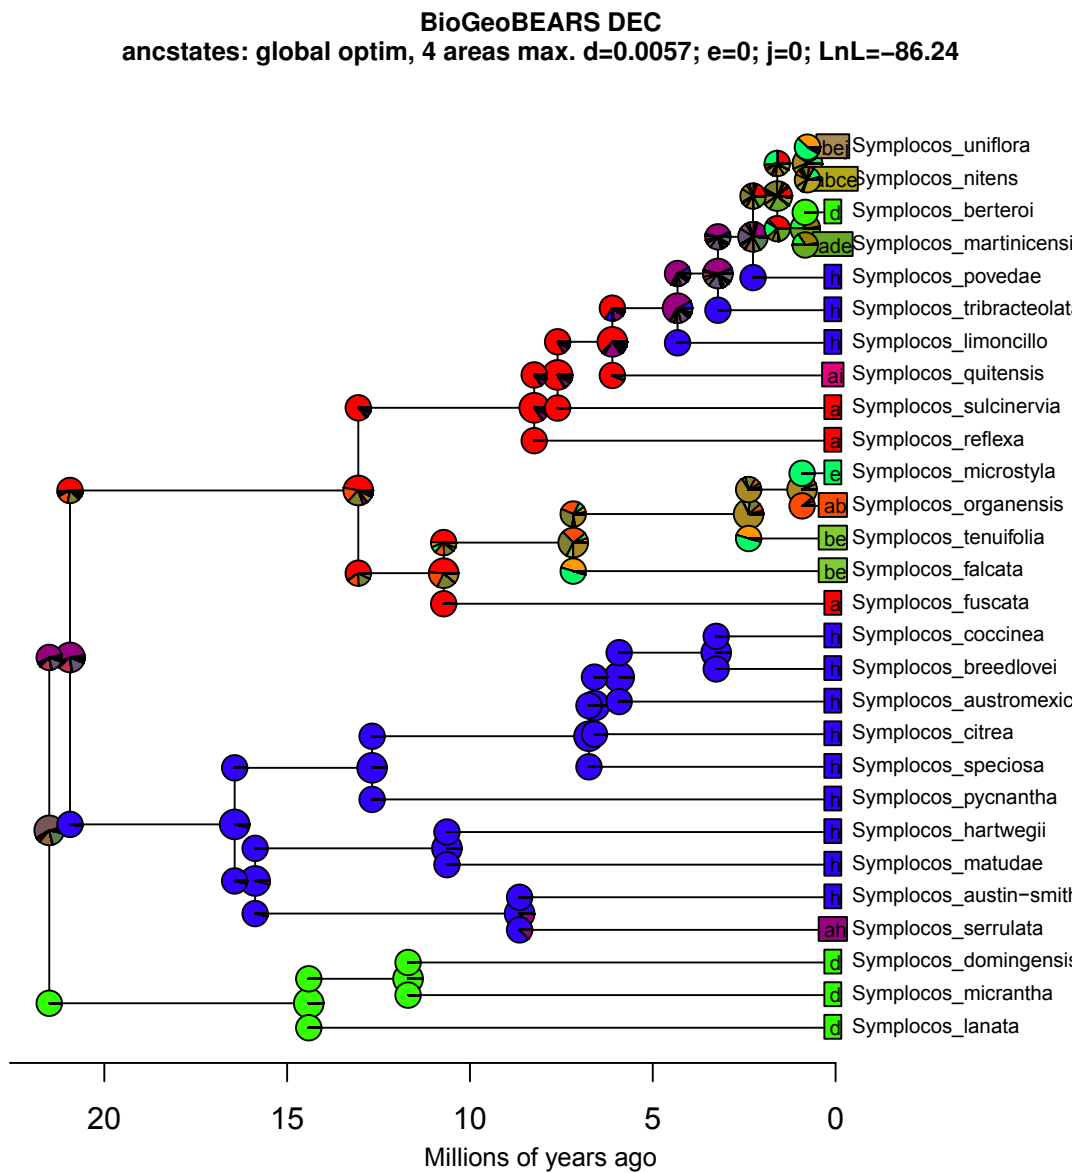

Figure S3: Clades of angiosperms

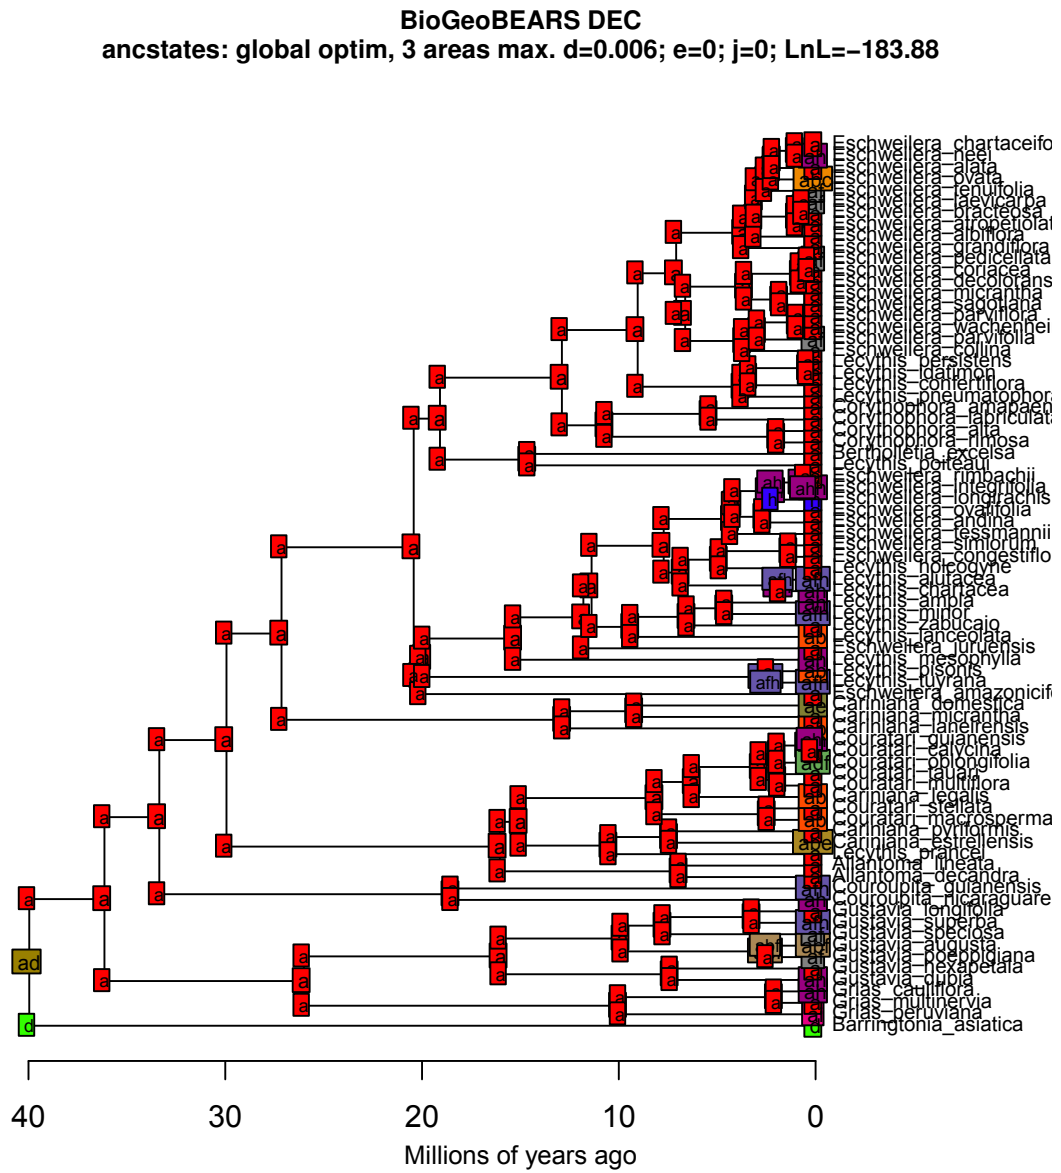

Figure S3: Clades of angiosperms

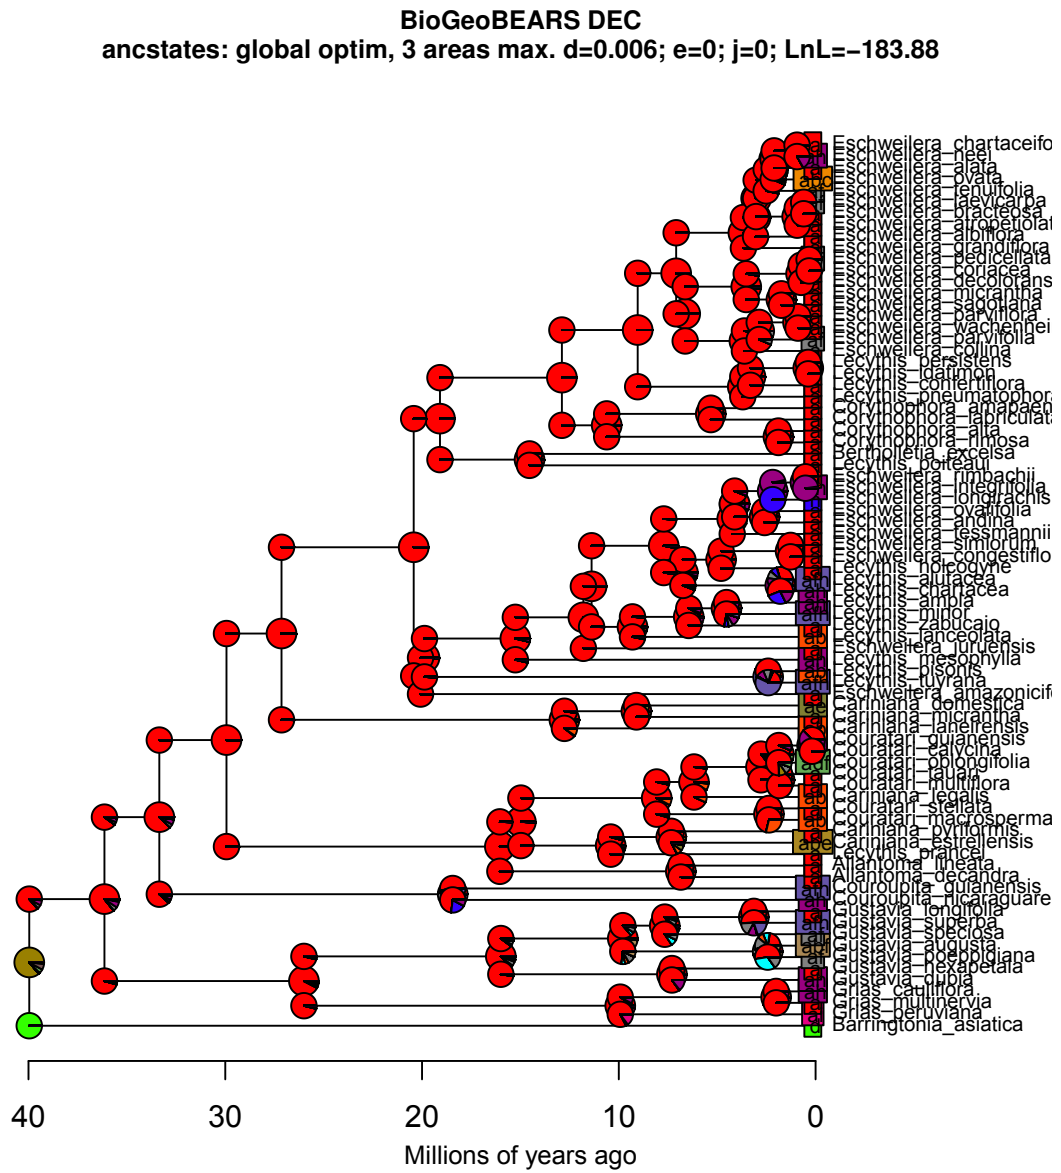

Figure S3: Clades of angiosperms

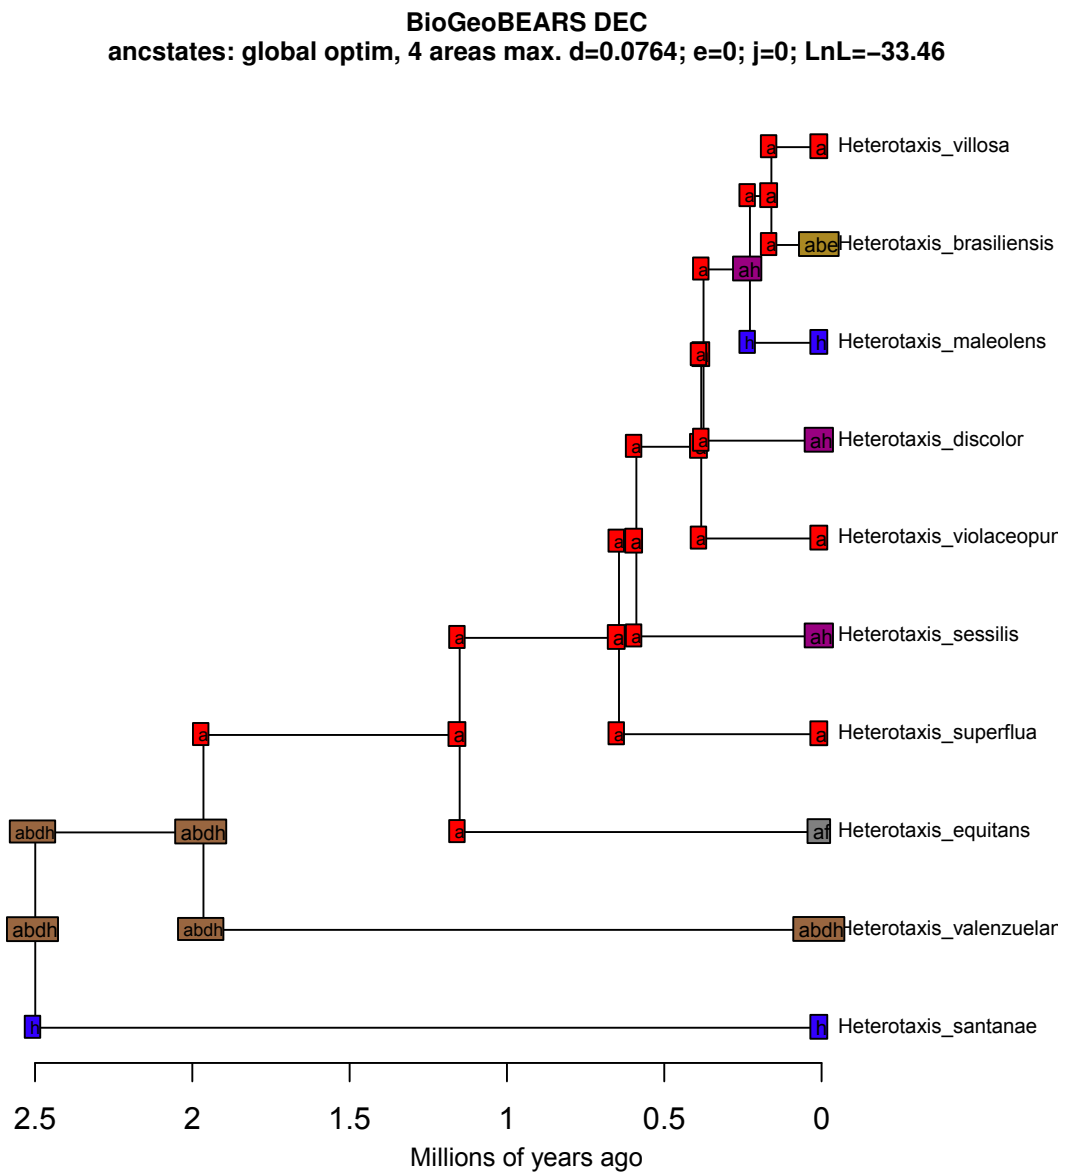

Figure S3: Clades of angiosperms

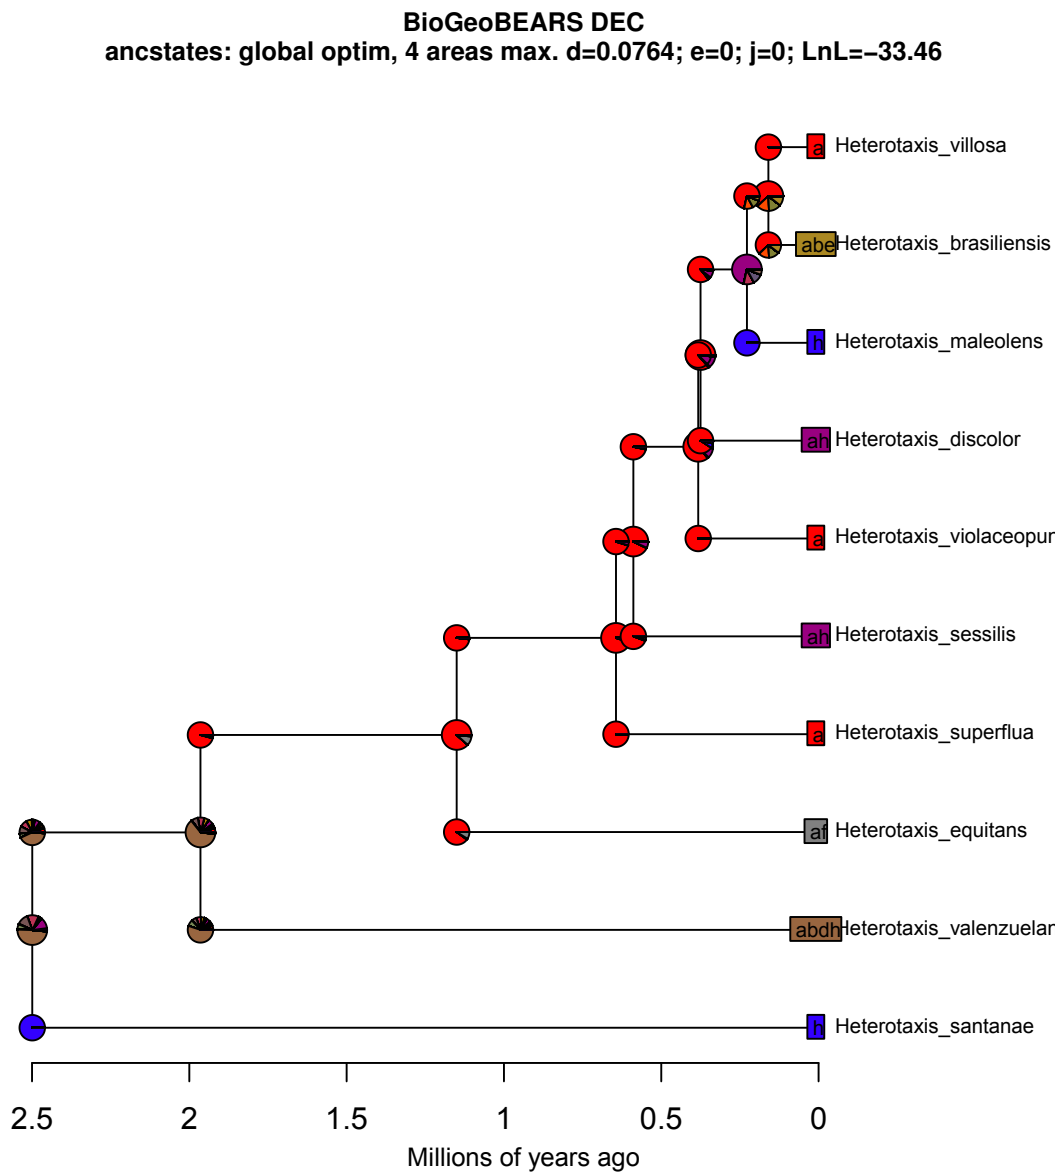

Figure S3: Clades of angiosperms

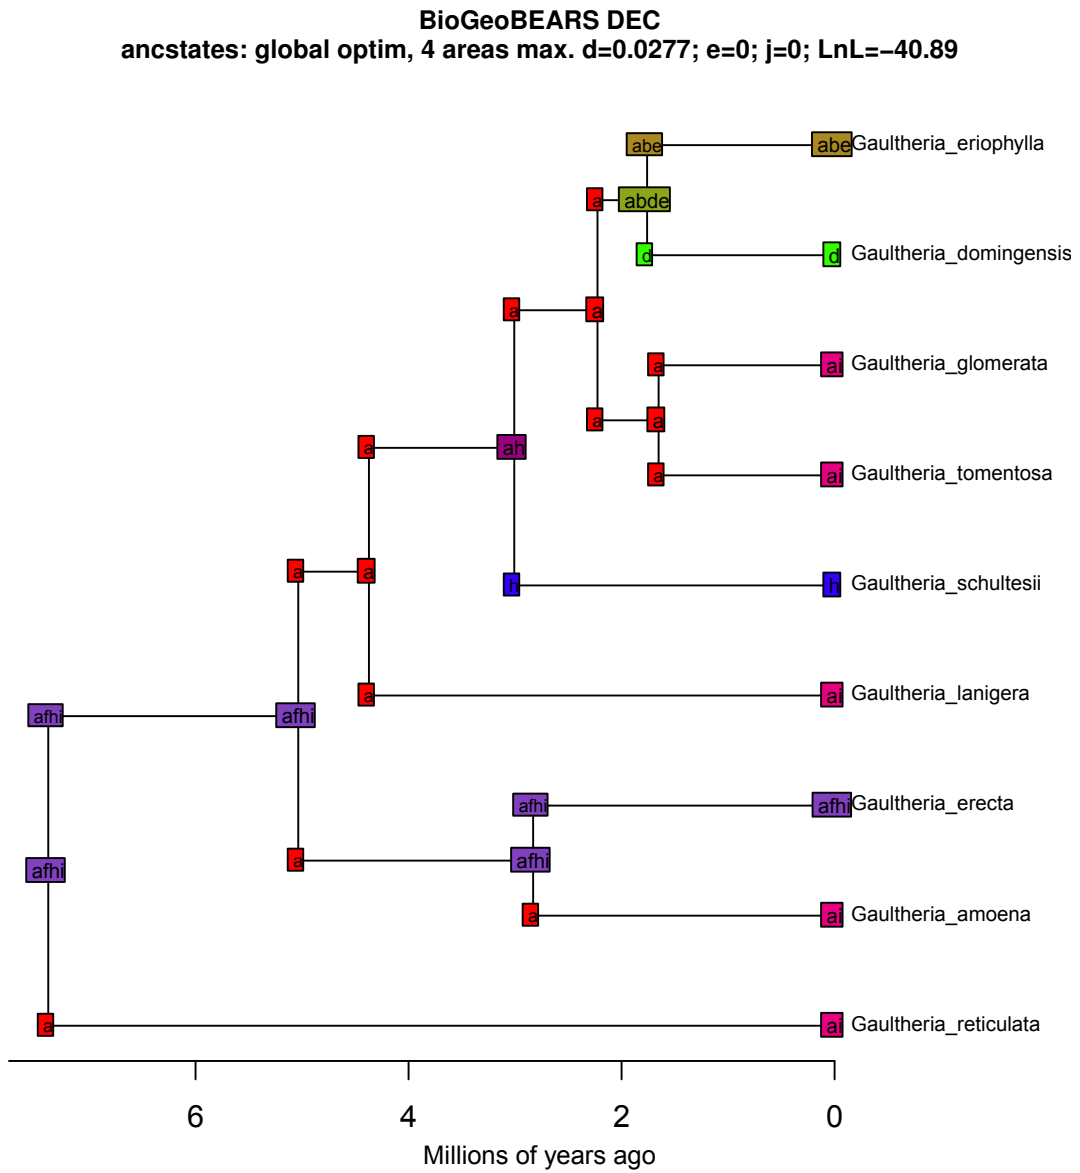



Figure S3: Clades of angiosperms

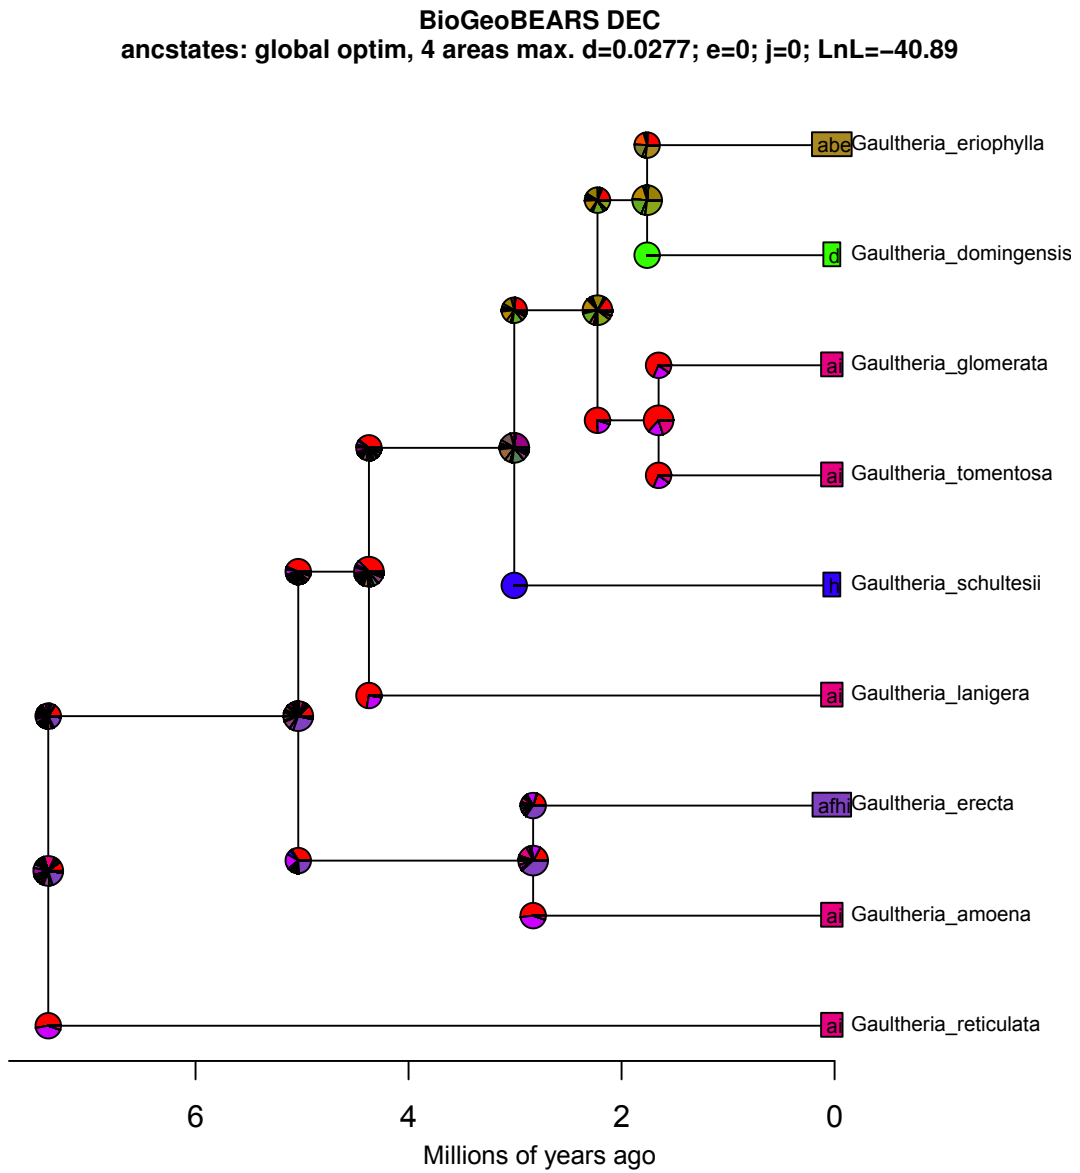

Figure S3: Clades of angiosperms

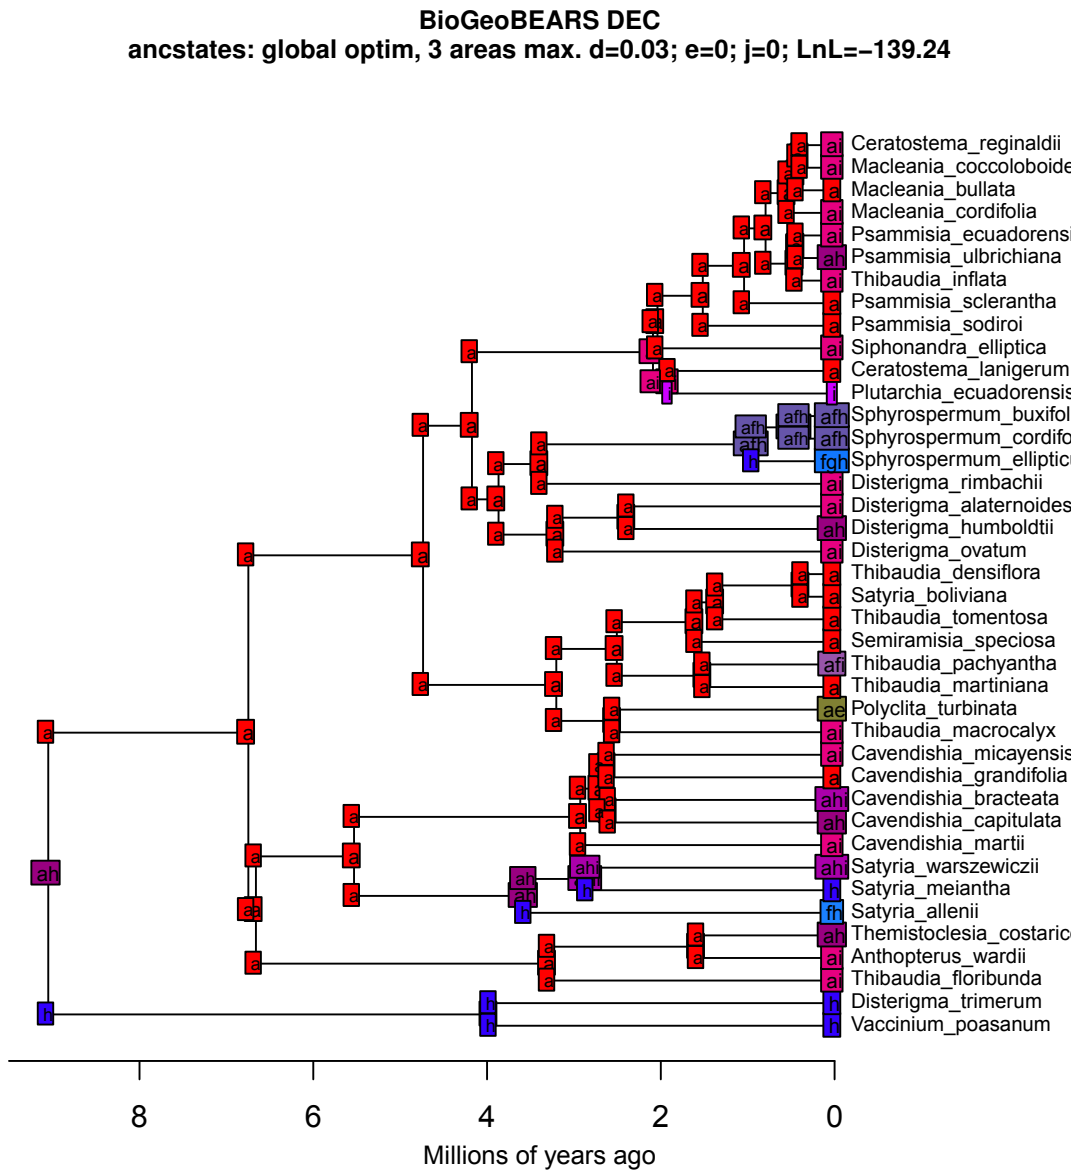

Figure S3: Clades of angiosperms

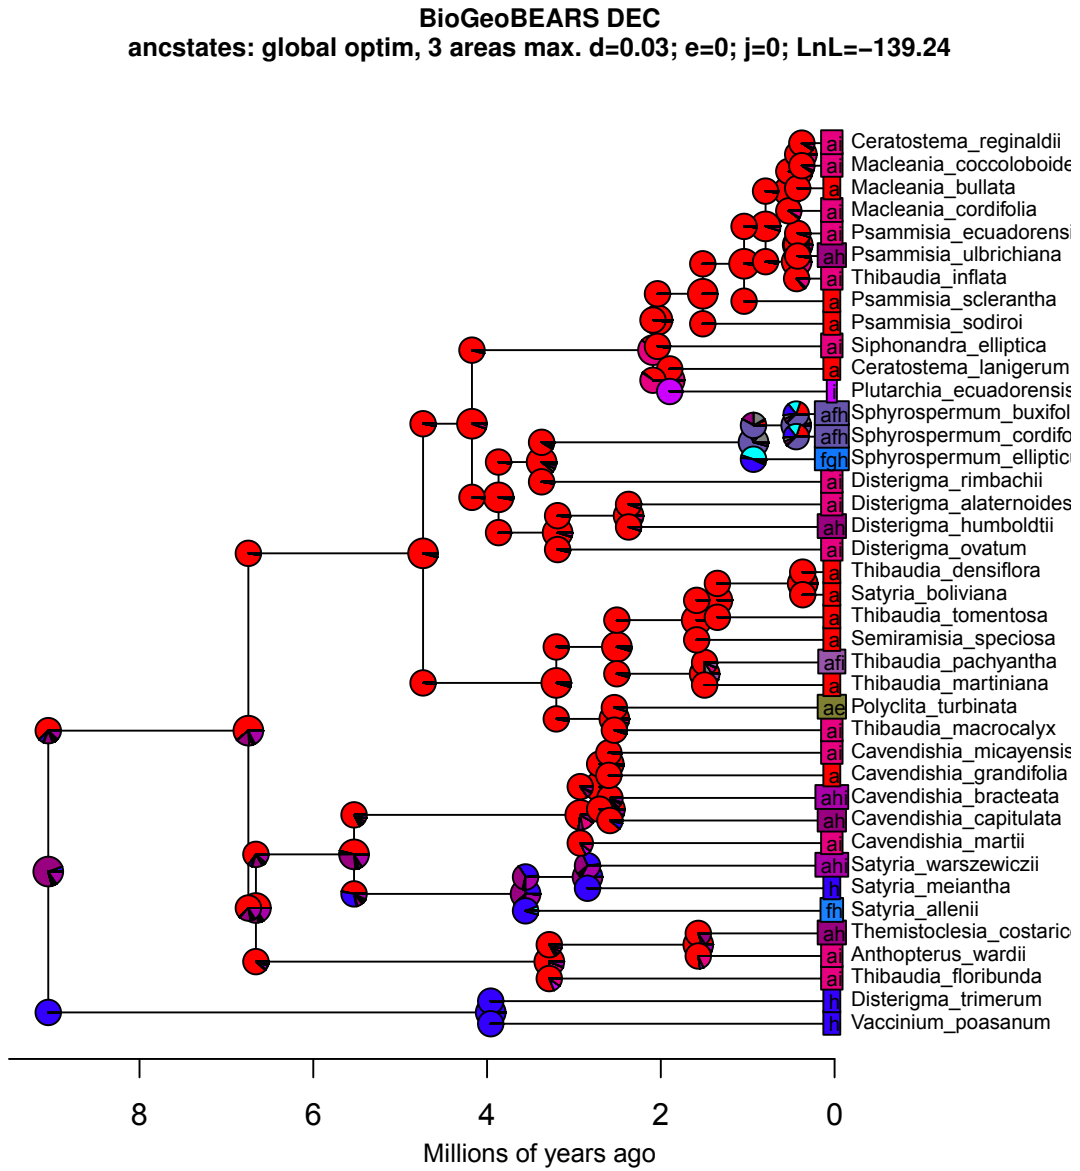

Figure S3: Clades of angiosperms

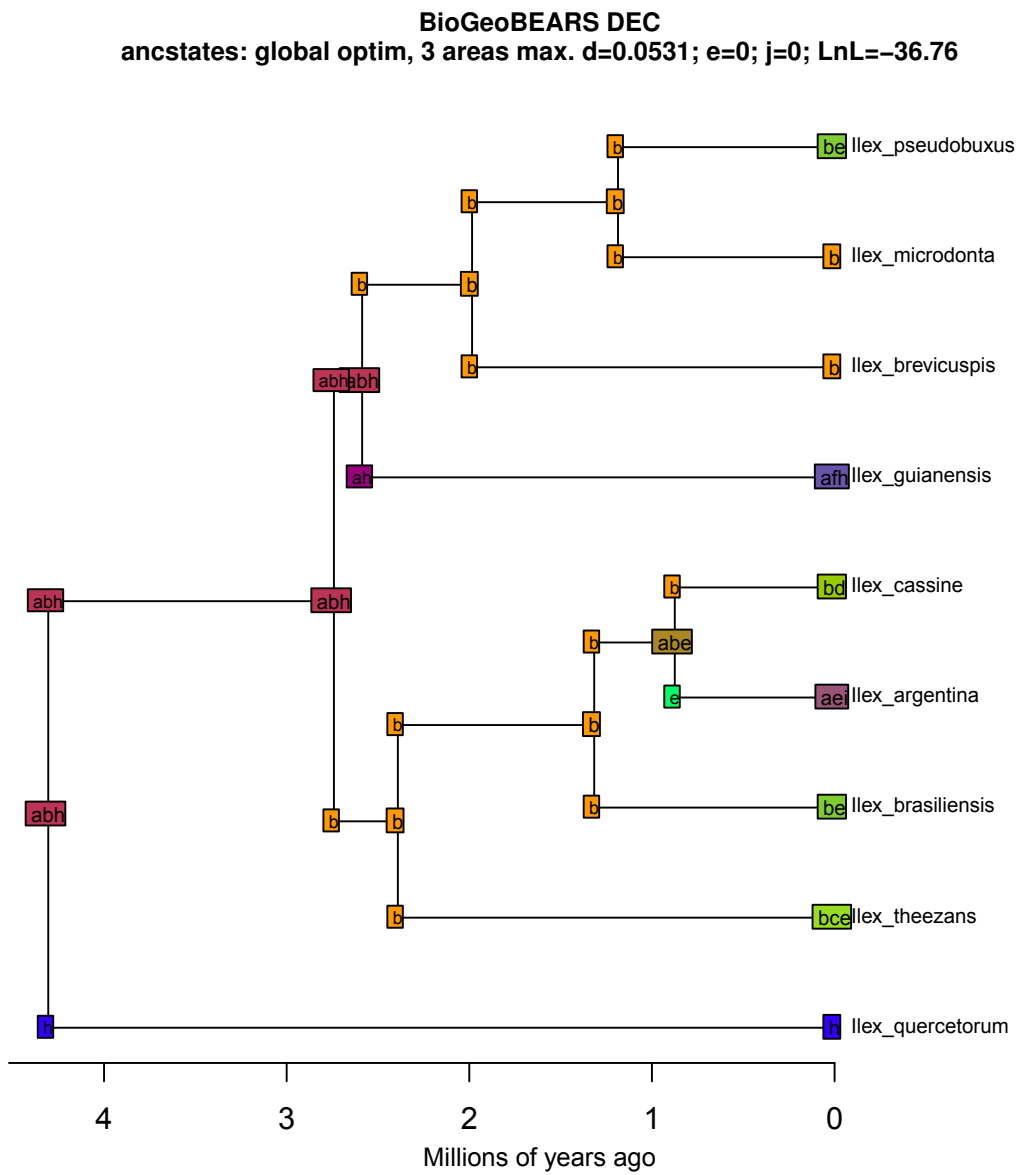

Figure S3: Clades of angiosperms

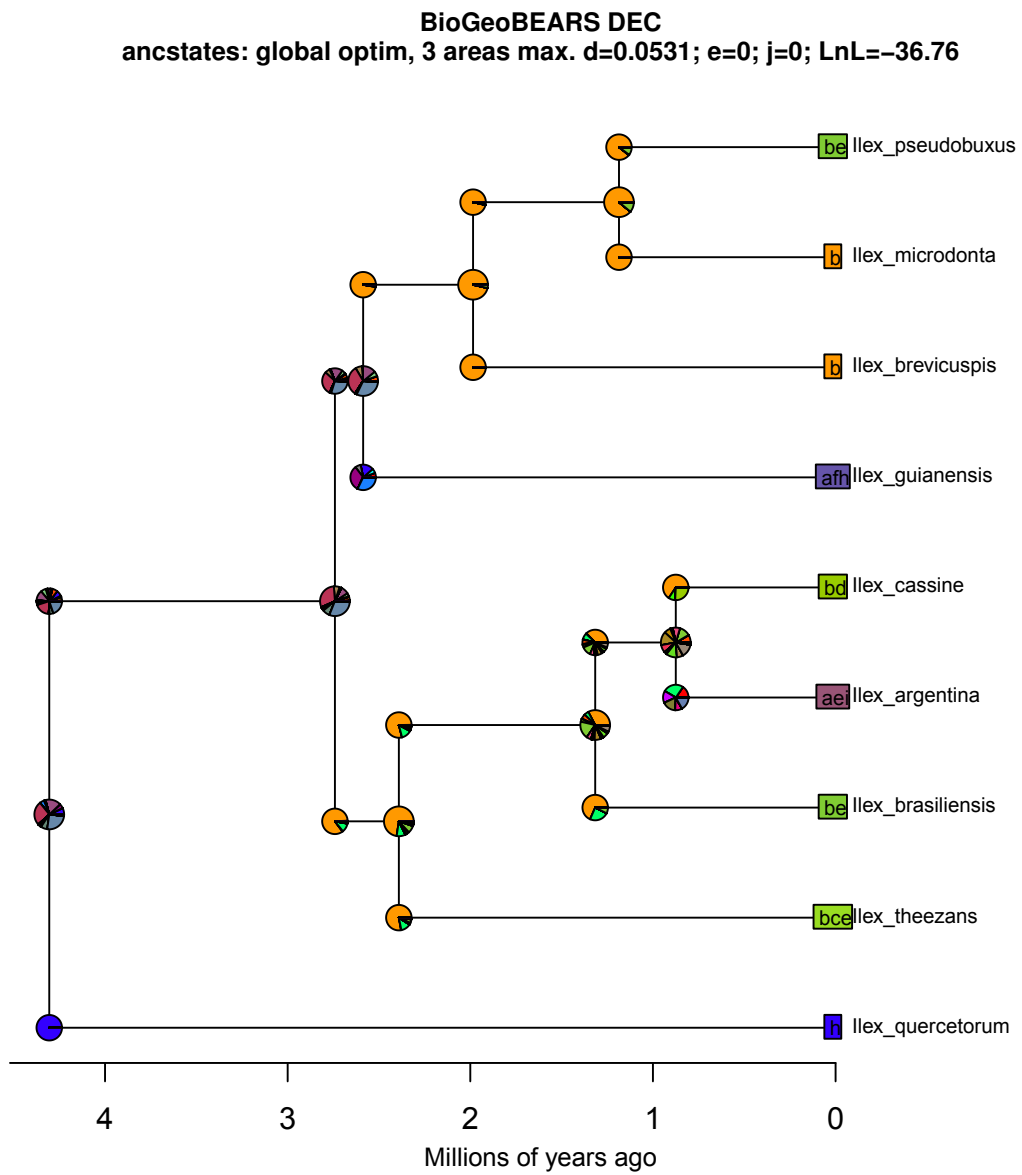

Figure S3: Clades of angiosperms

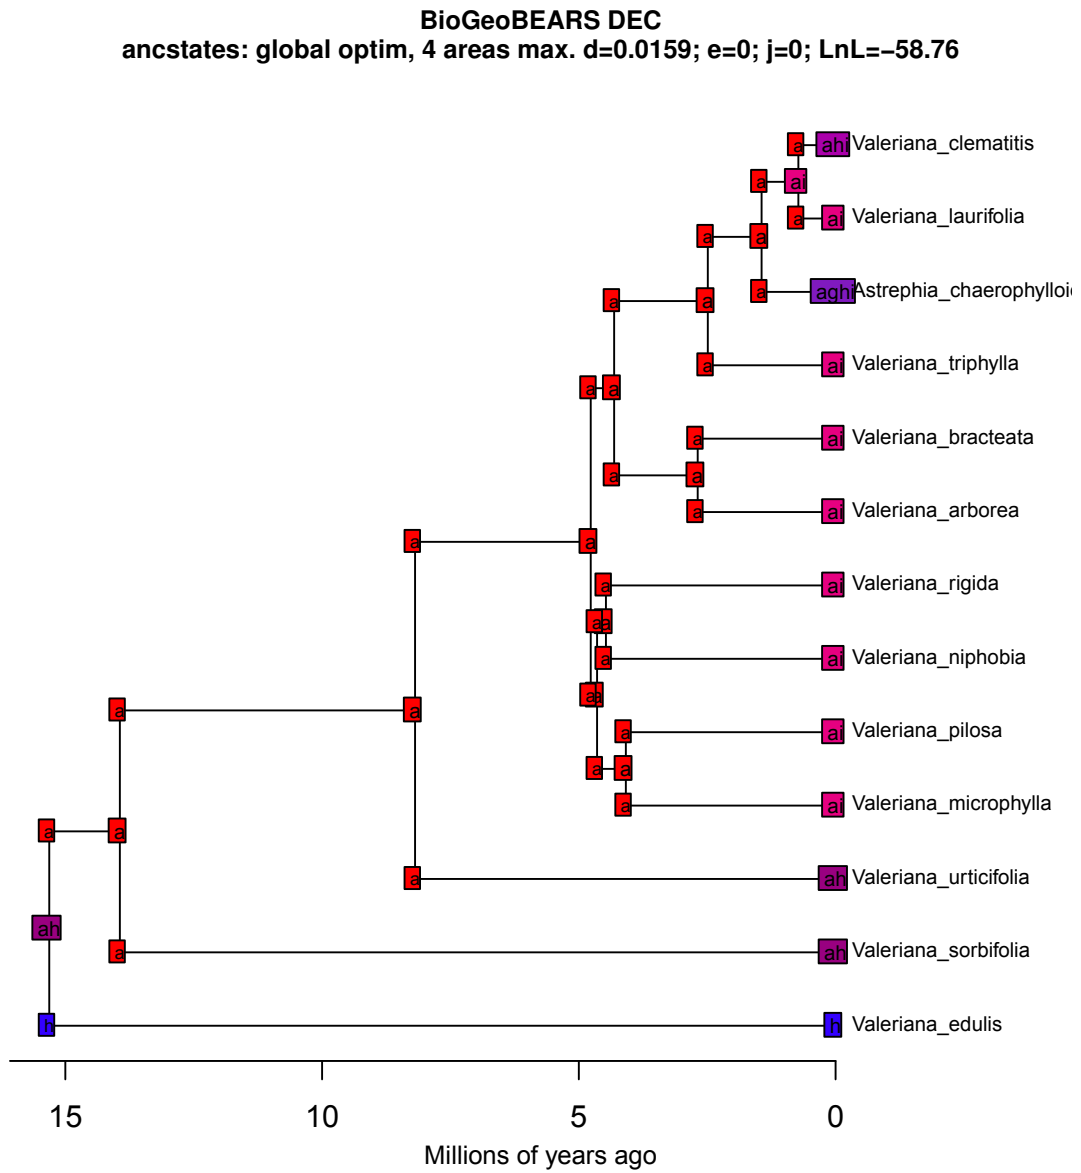

Figure S3: Clades of angiosperms

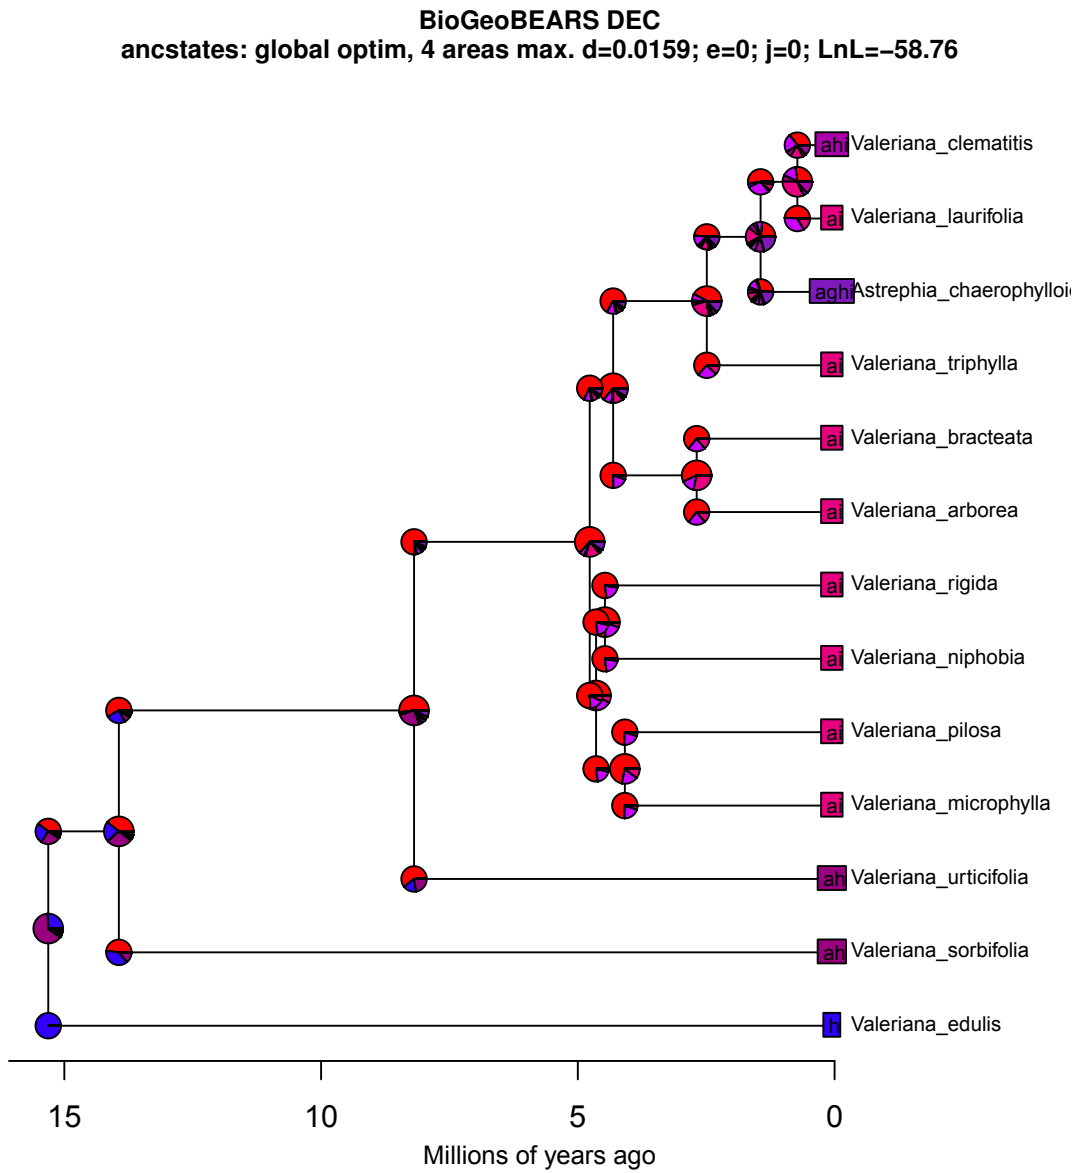

Figure S3: Clades of angiosperms

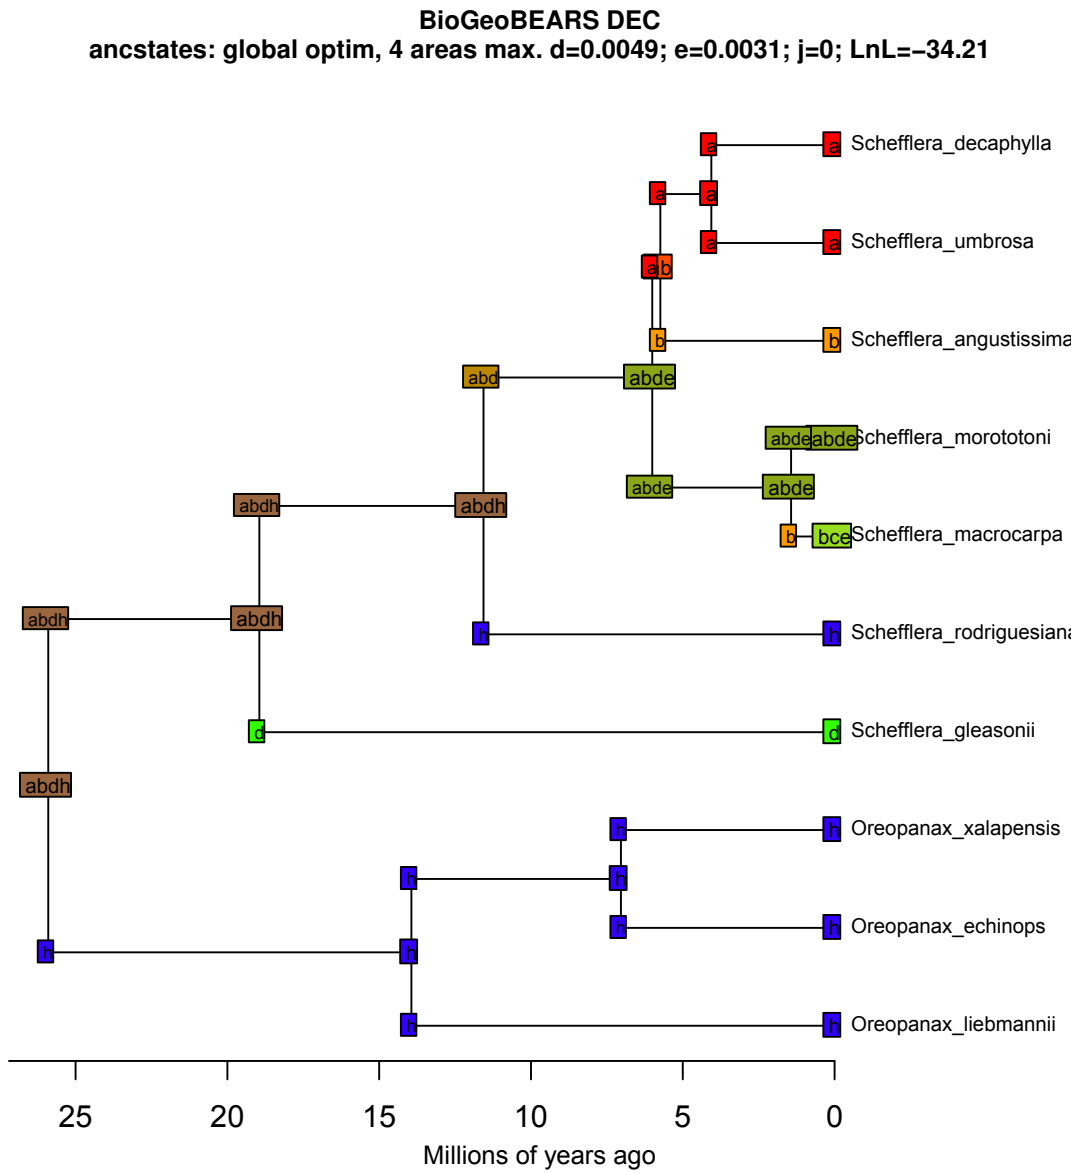



Figure S3: Clades of angiosperms

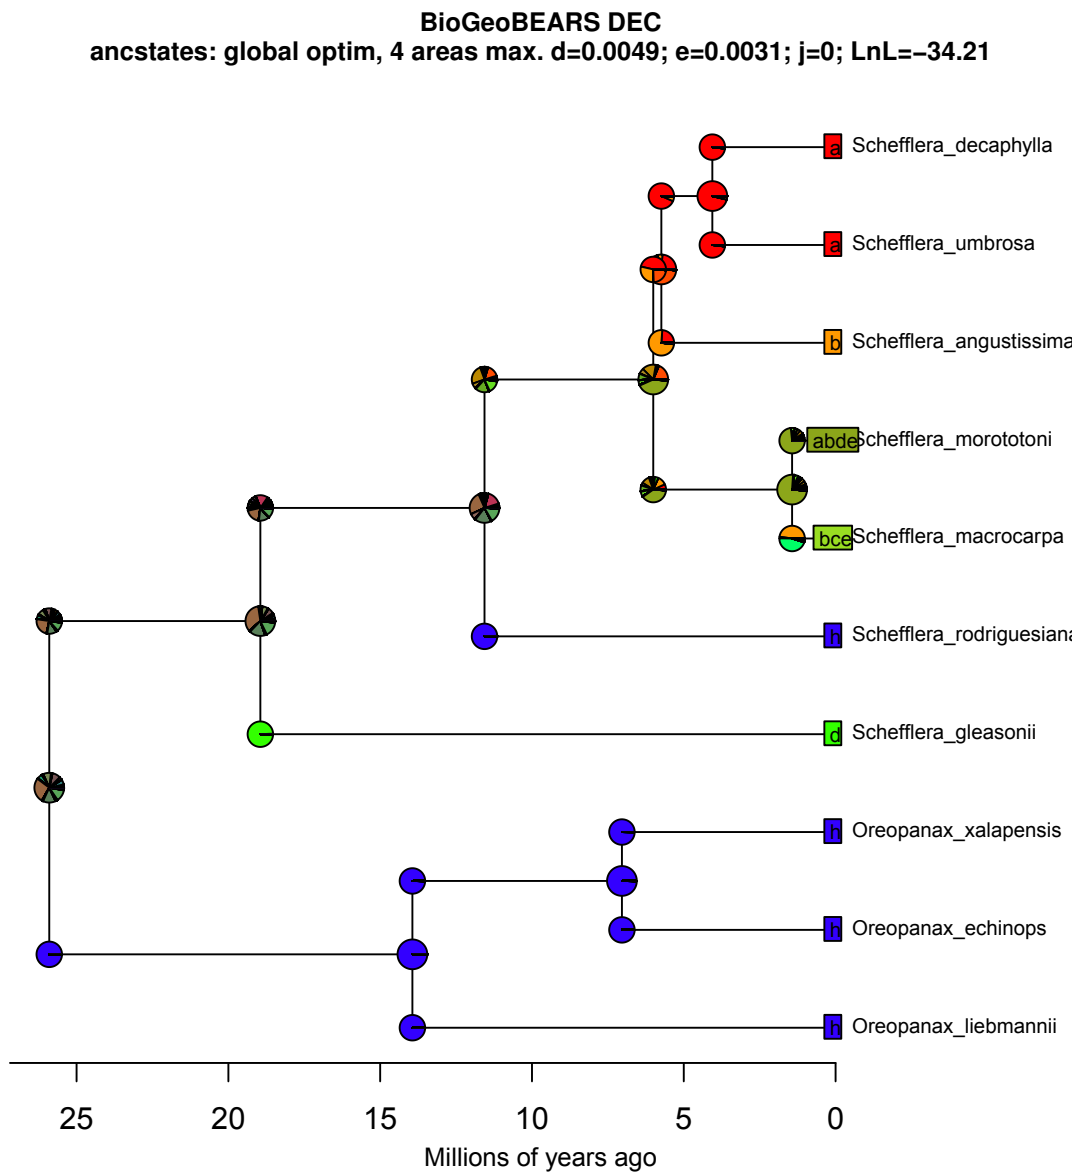

Figure S3: Clades of angiosperms

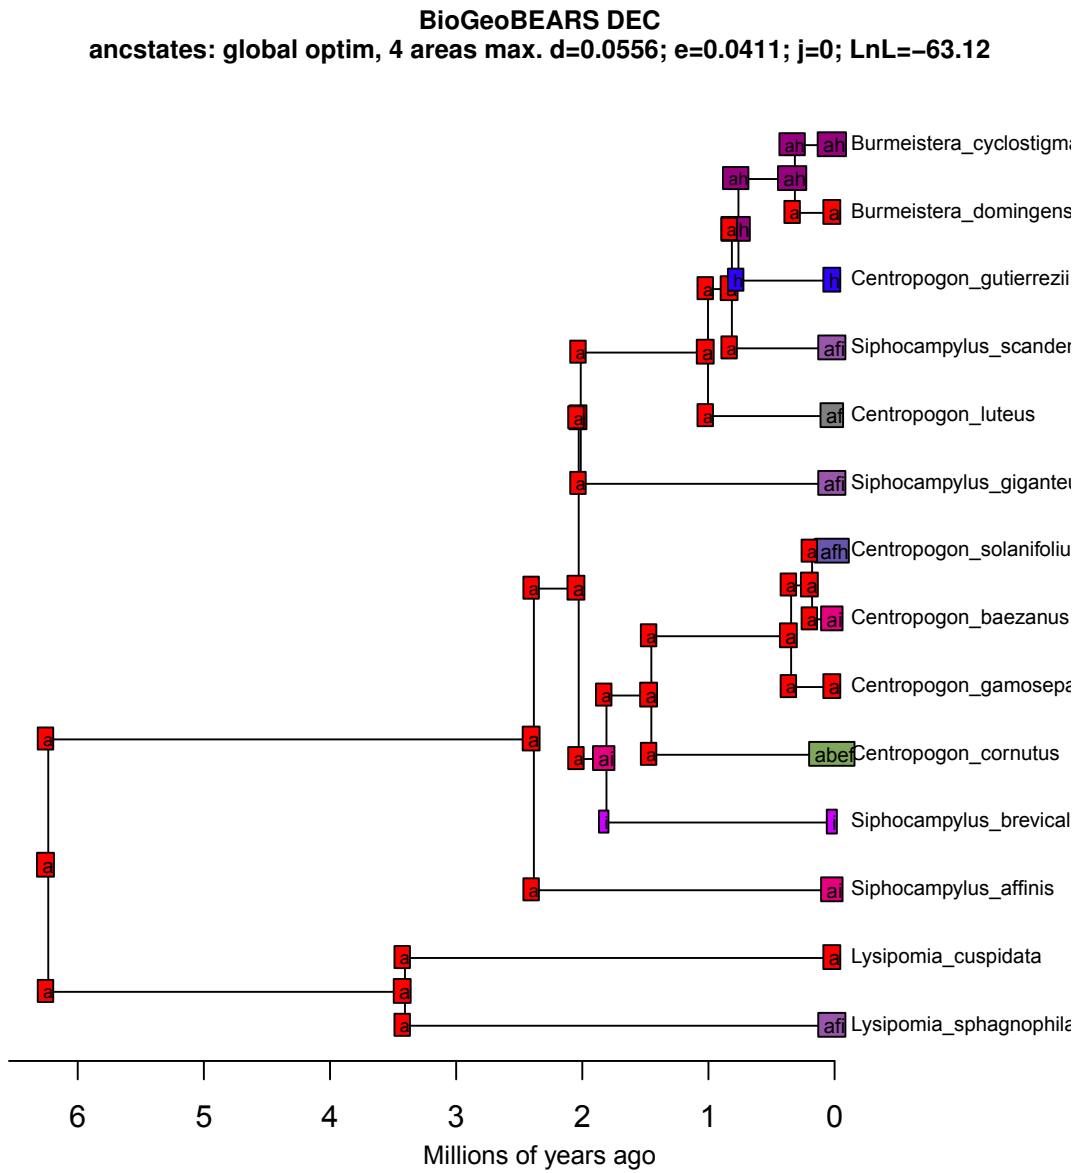

Figure S3: Clades of angiosperms

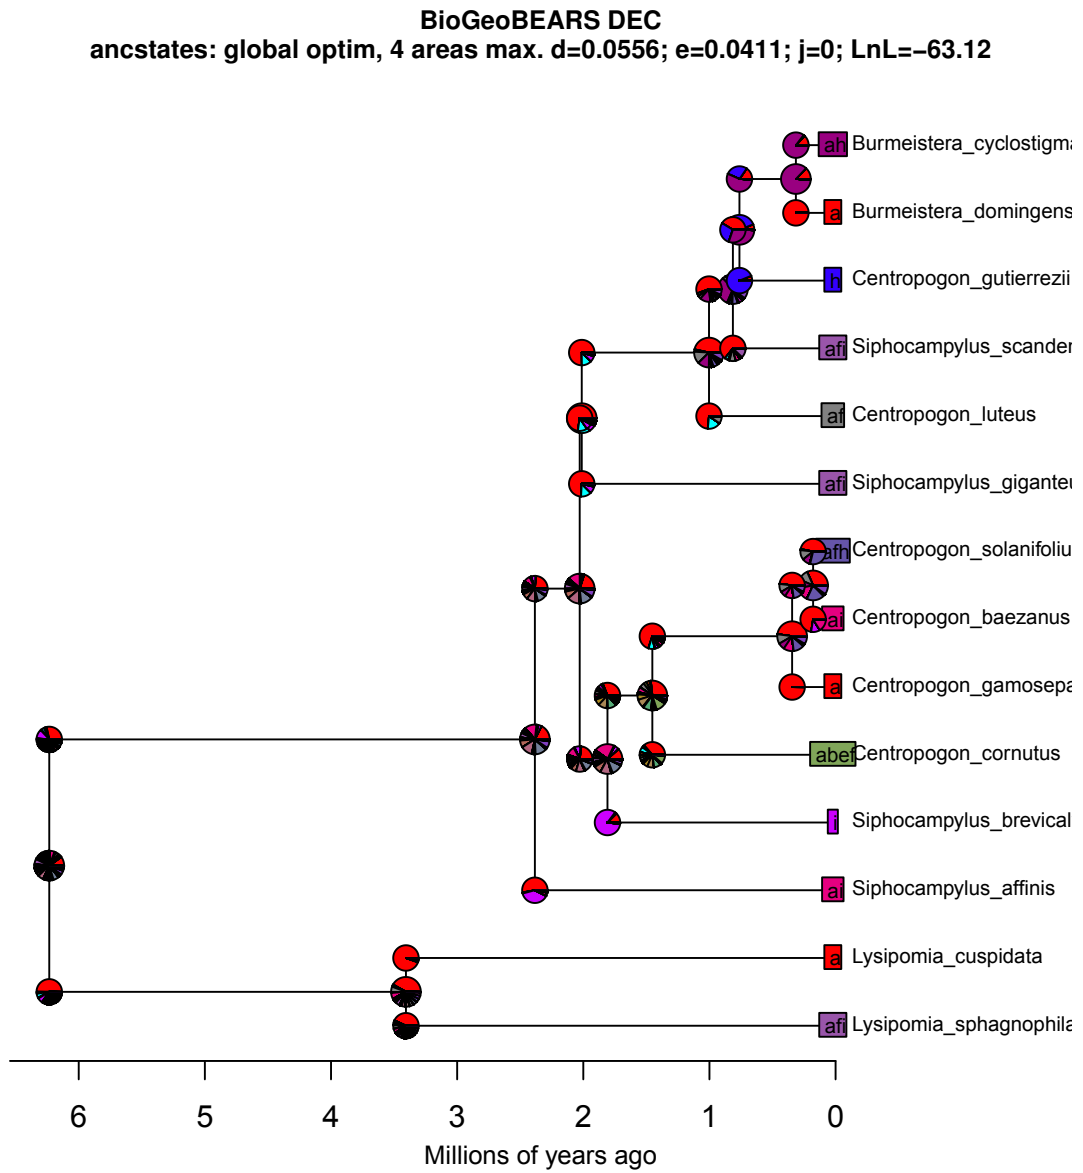

Figure S3: Clades of angiosperms

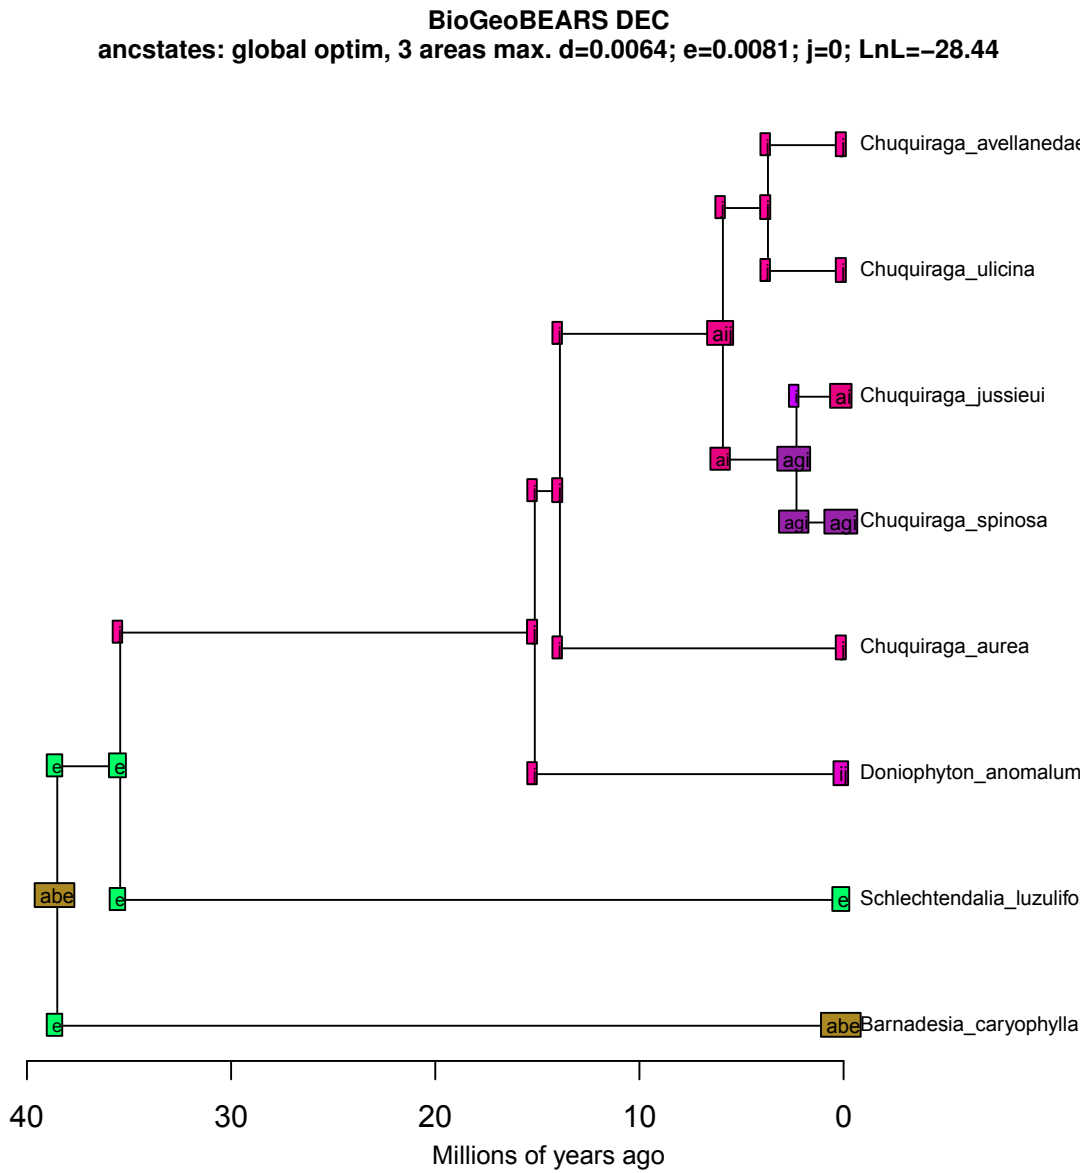

Figure S3: Clades of angiosperms

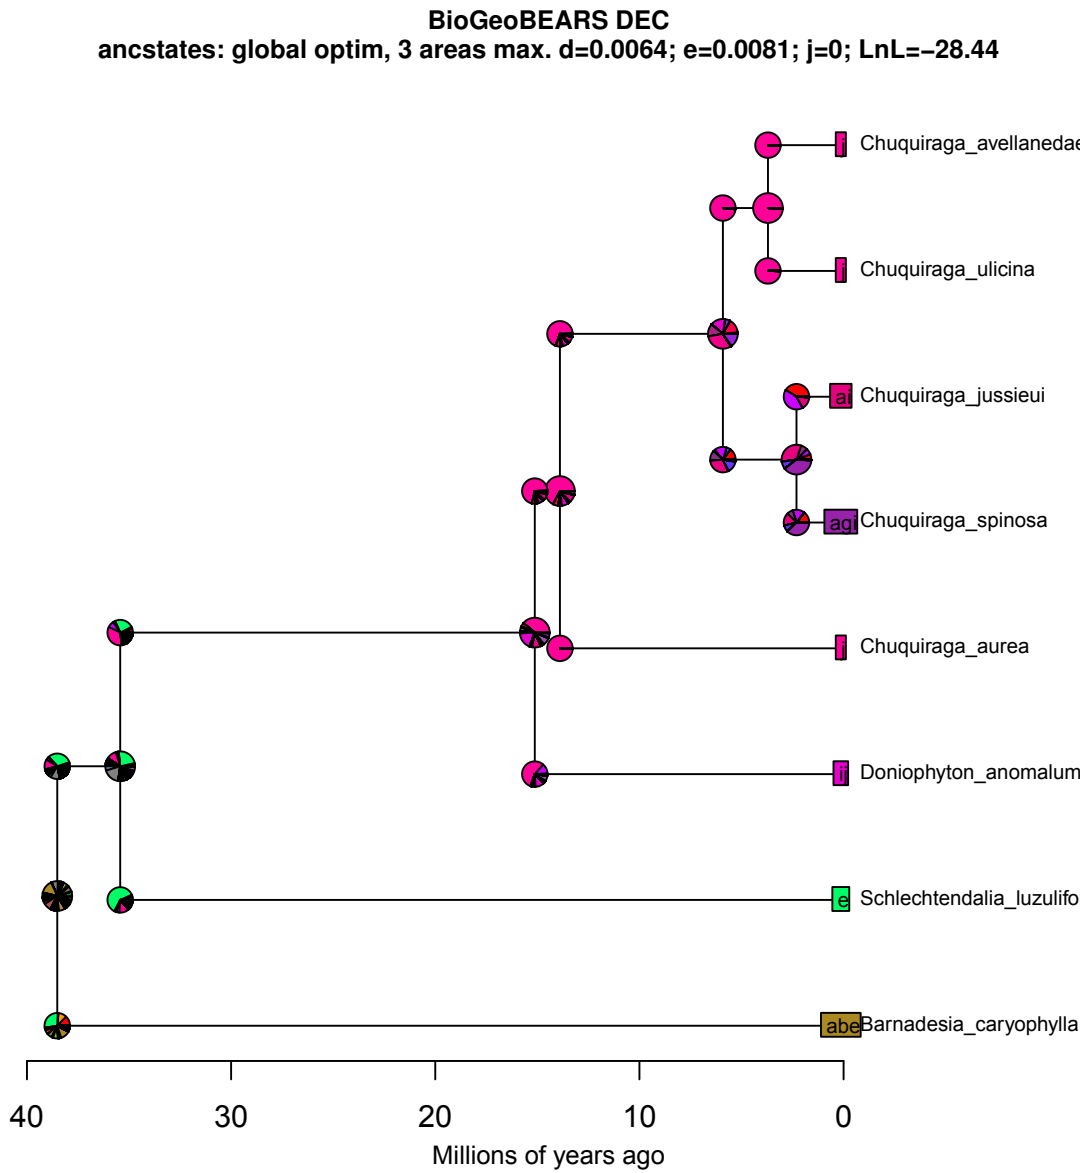

Figure S3: Clades of angiosperms

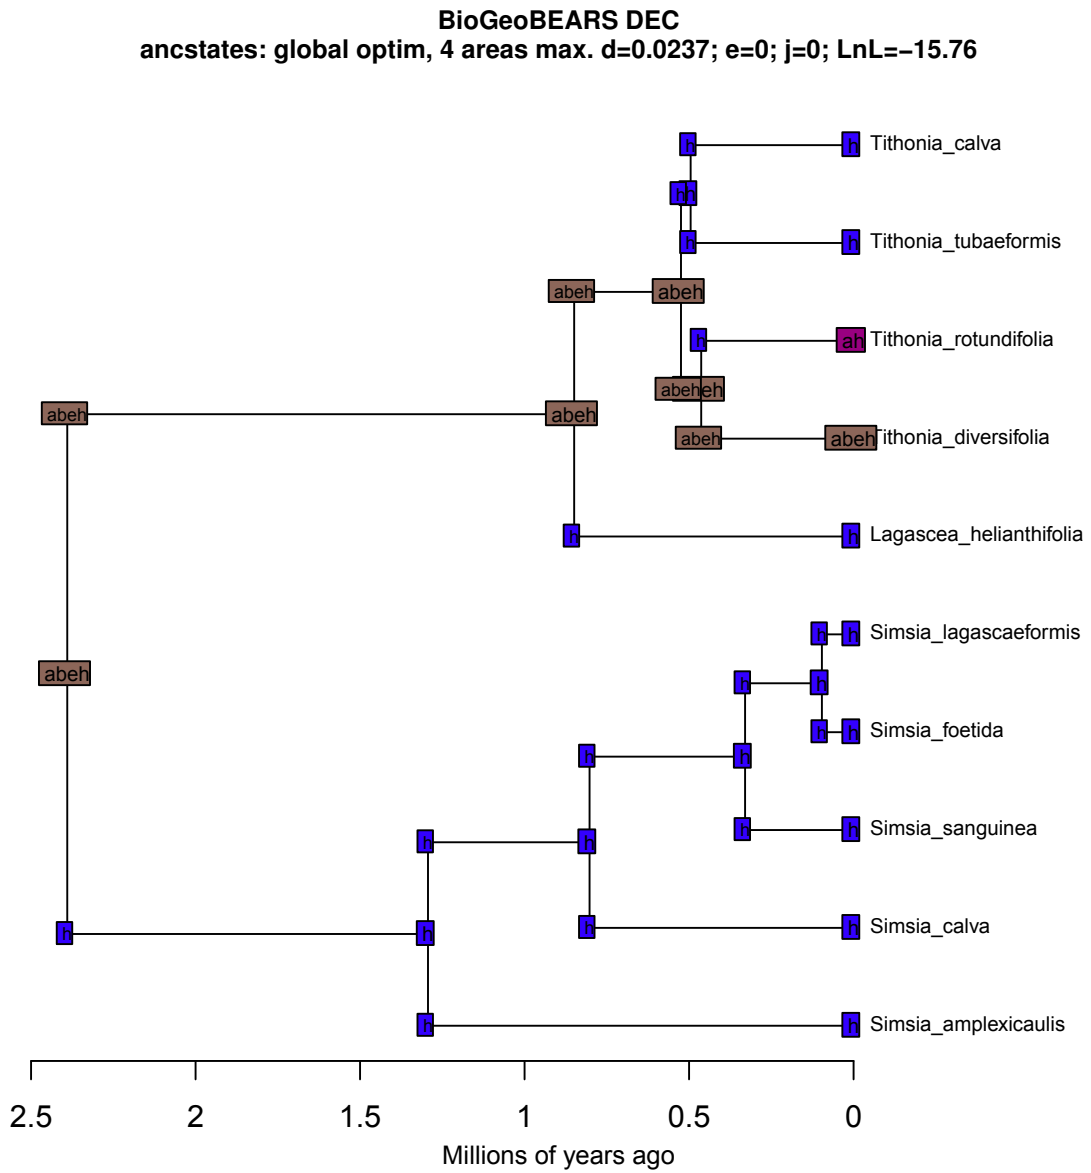

Figure S3: Clades of angiosperms

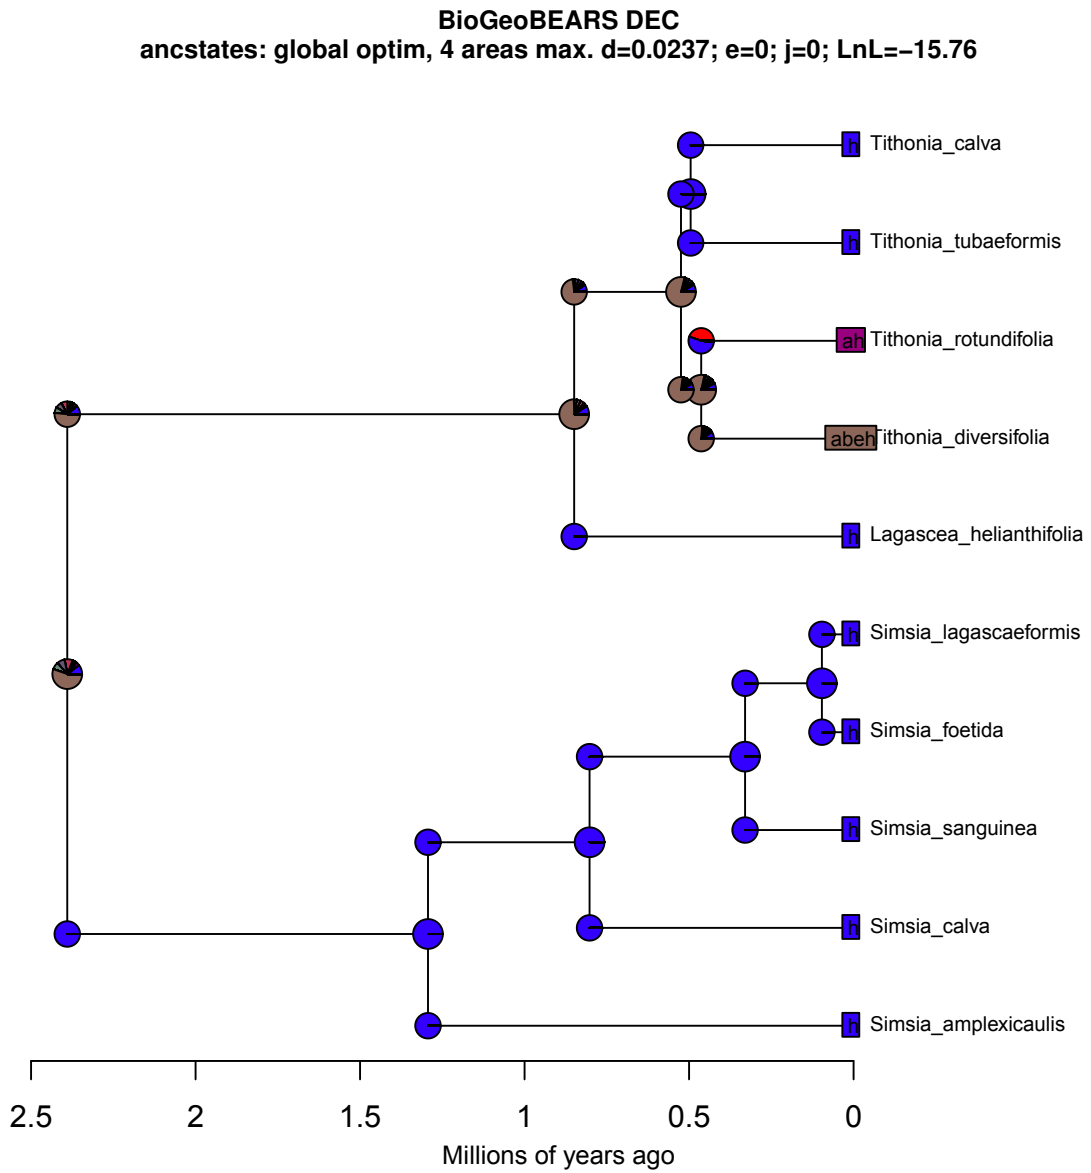

Figure S4: Clades of frogs

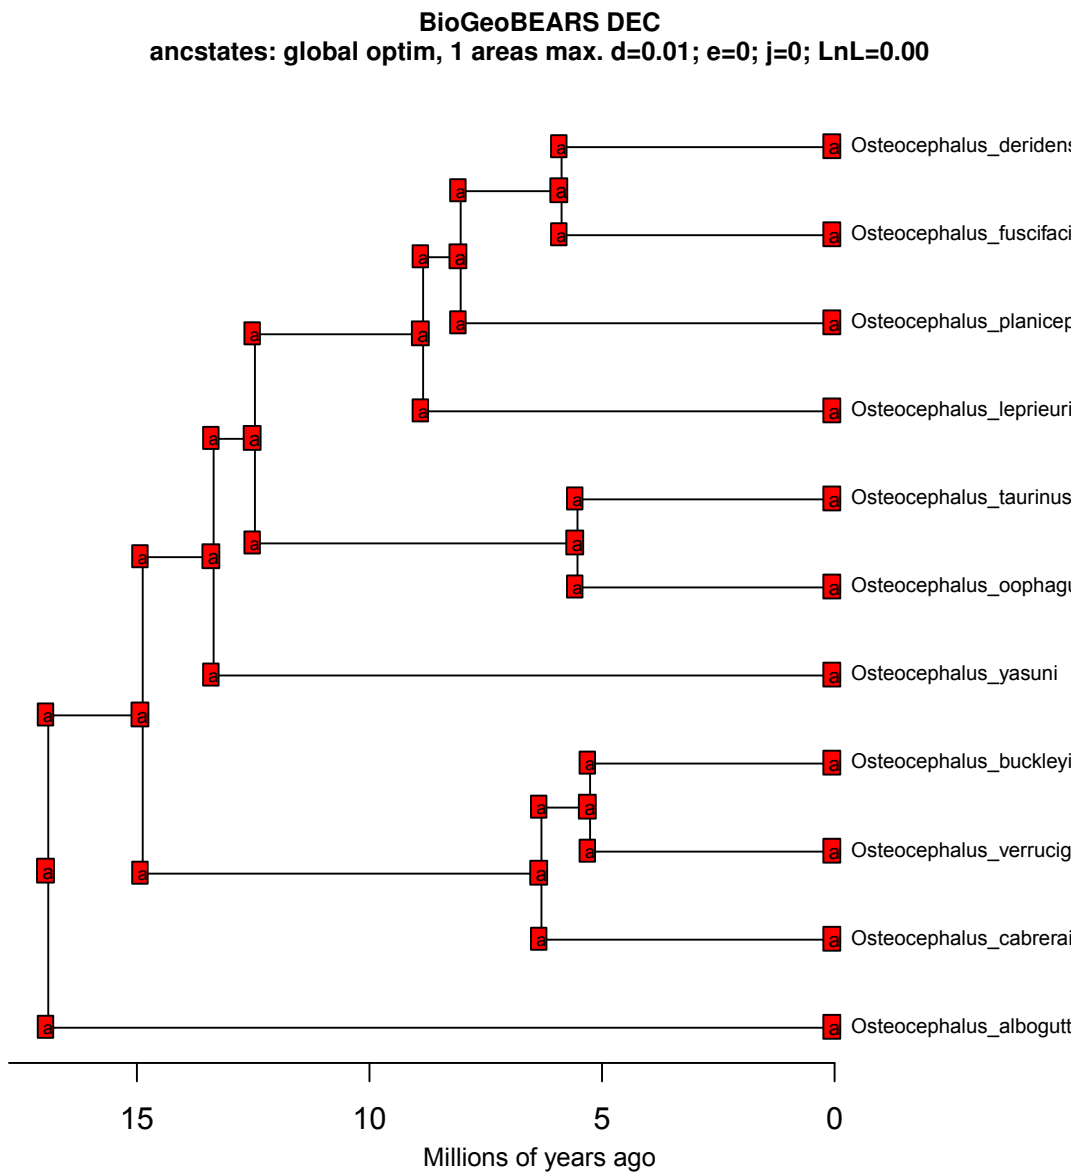



Figure S4: Clades of frogs

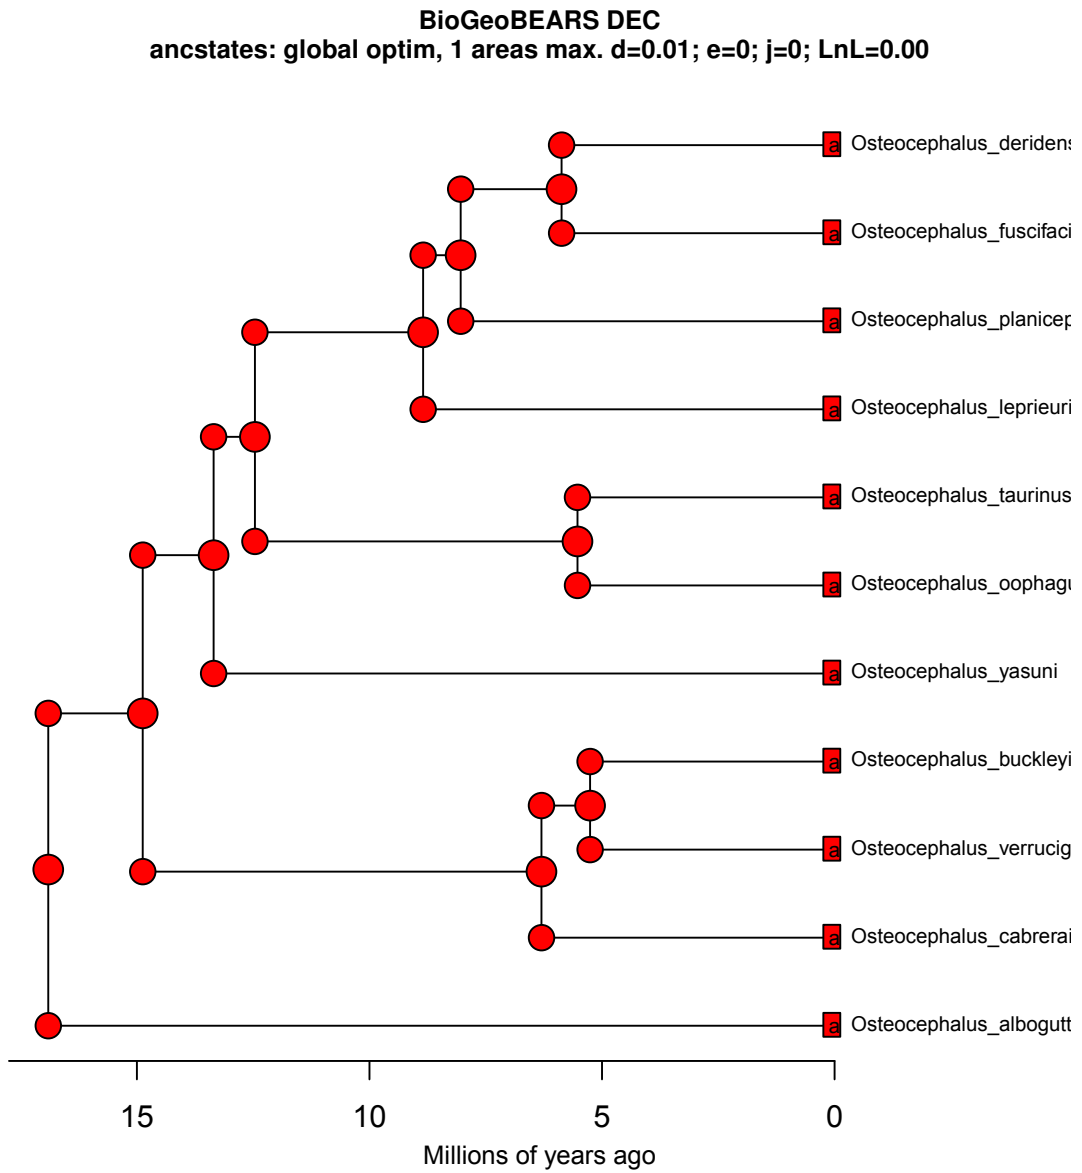

Figure S4: Clades of frogs

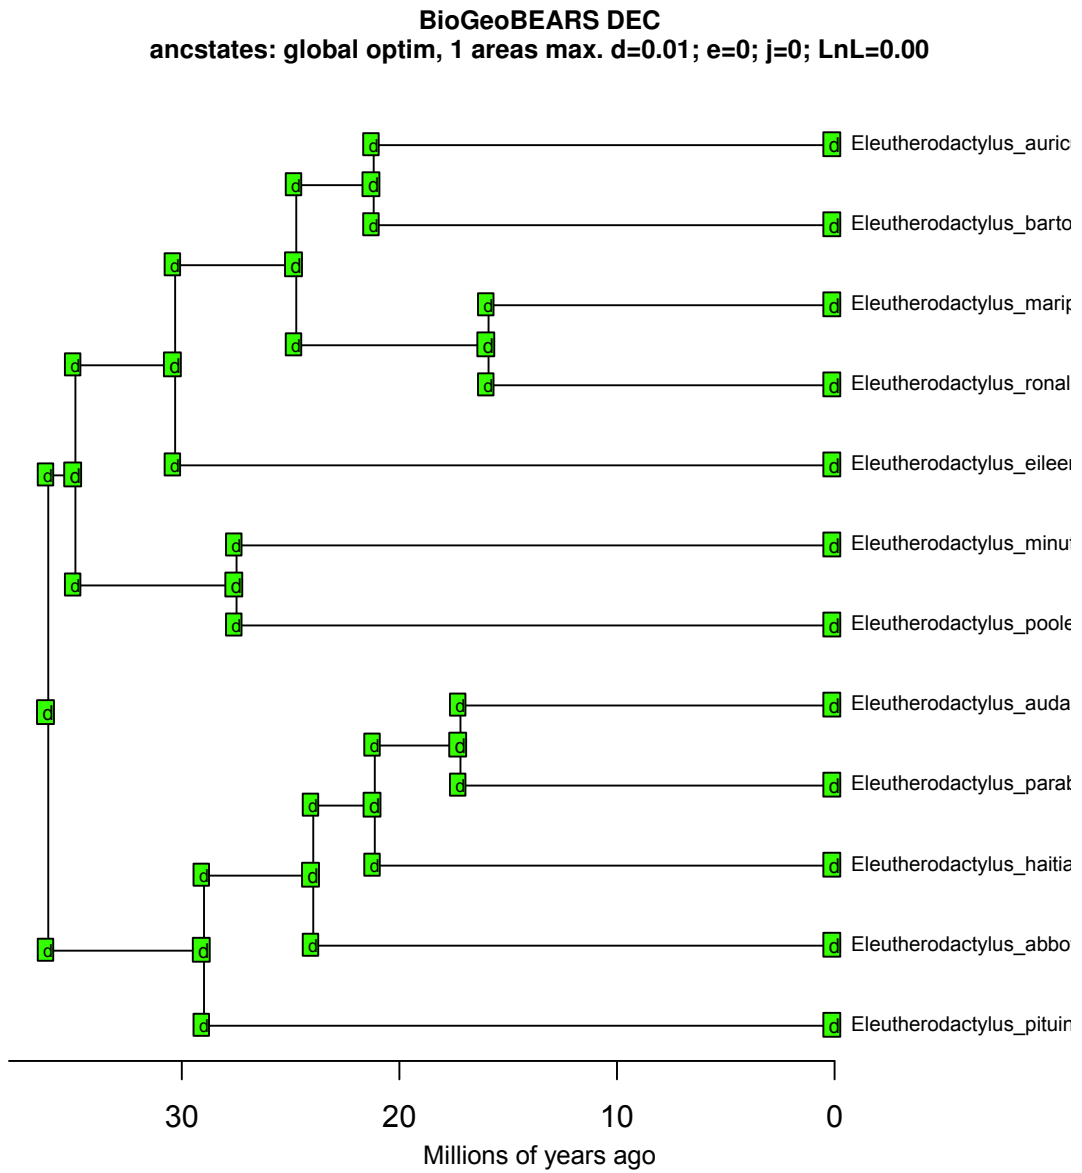

Figure S4: Clades of frogs

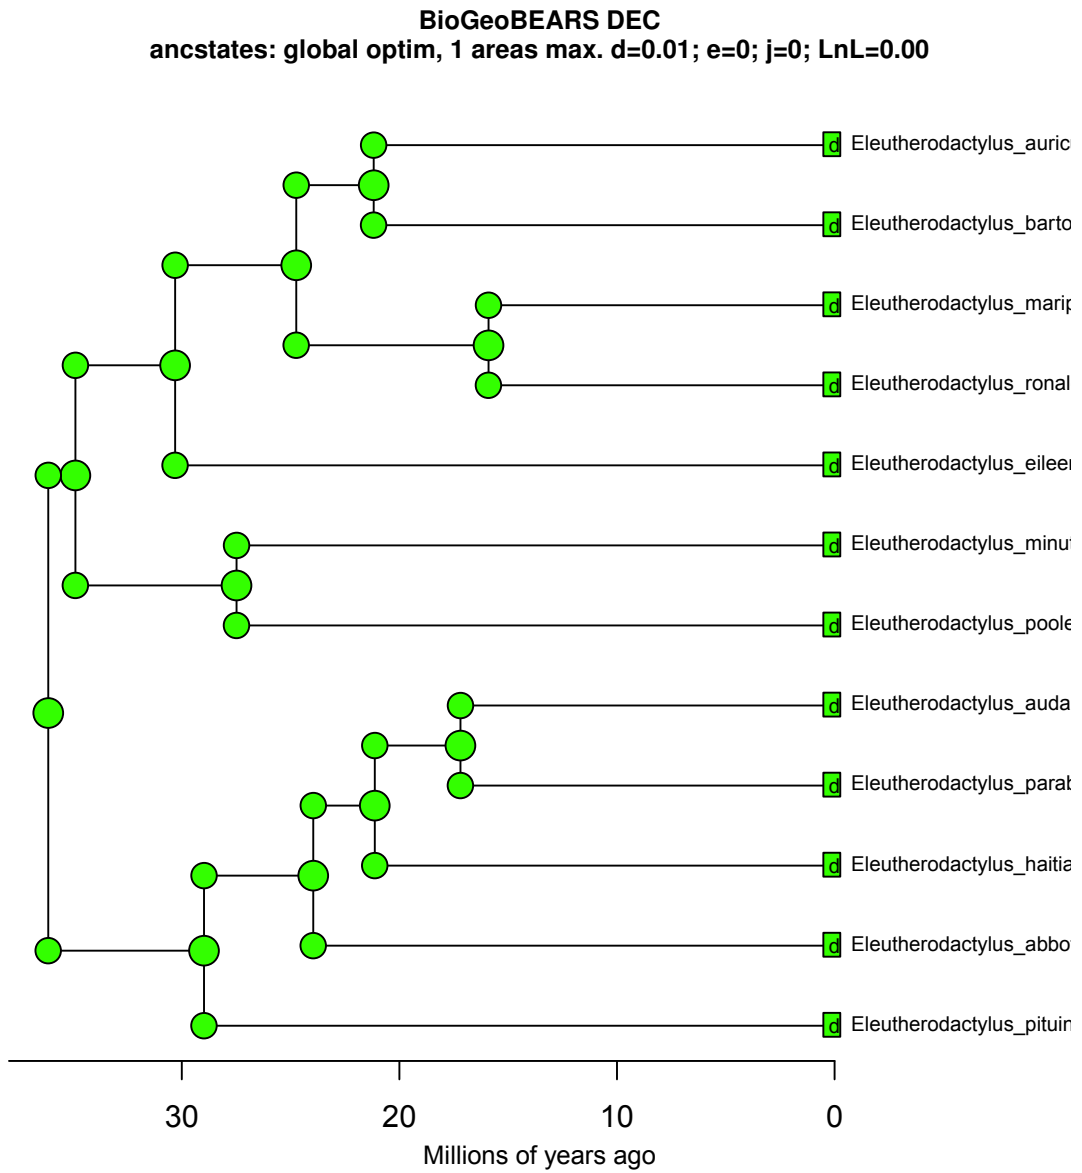

Figure S4: Clades of frogs

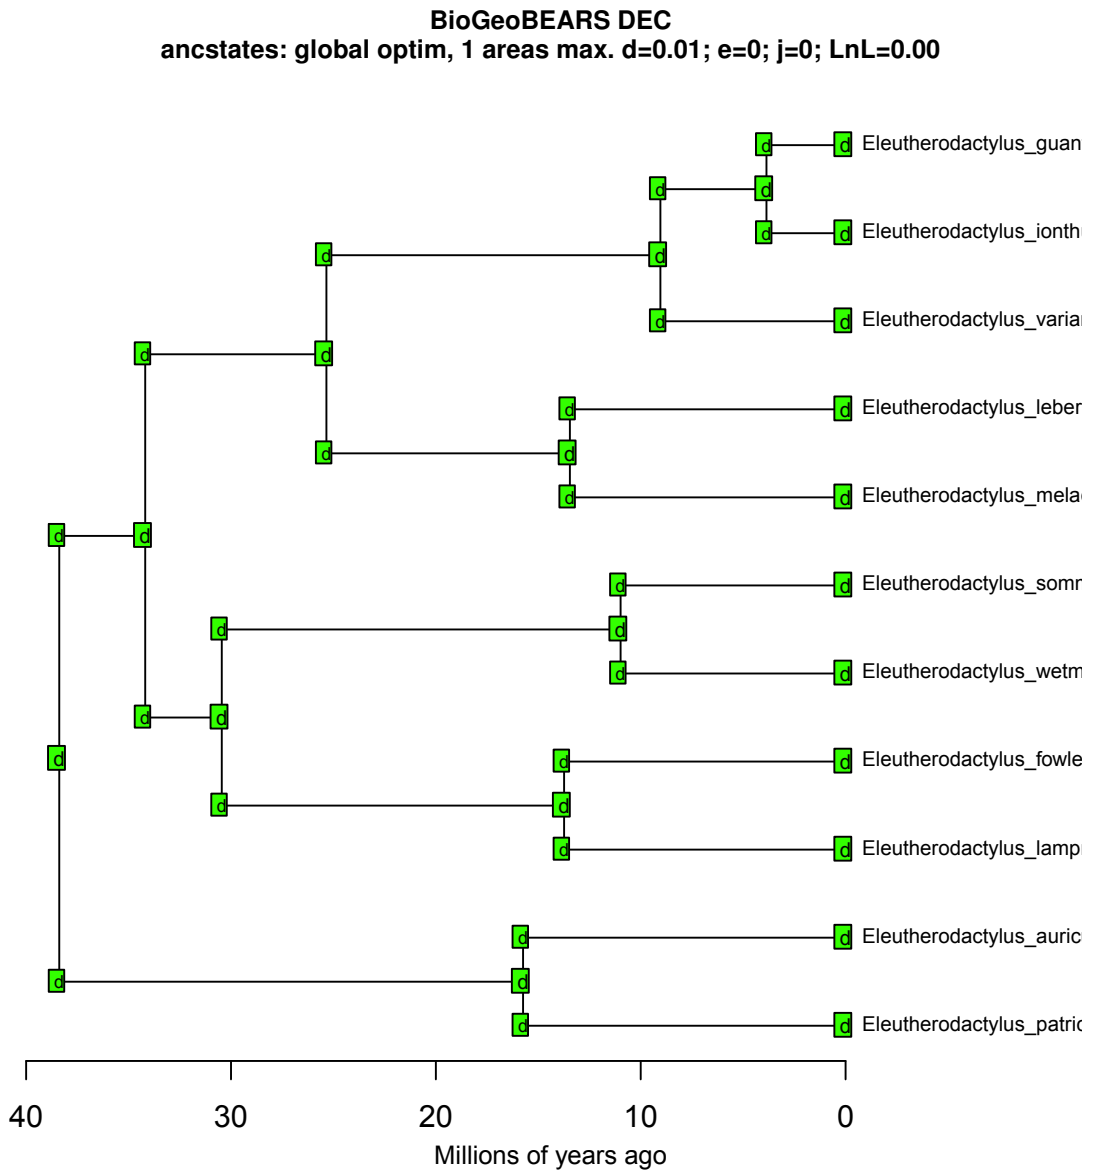

Figure S4: Clades of frogs

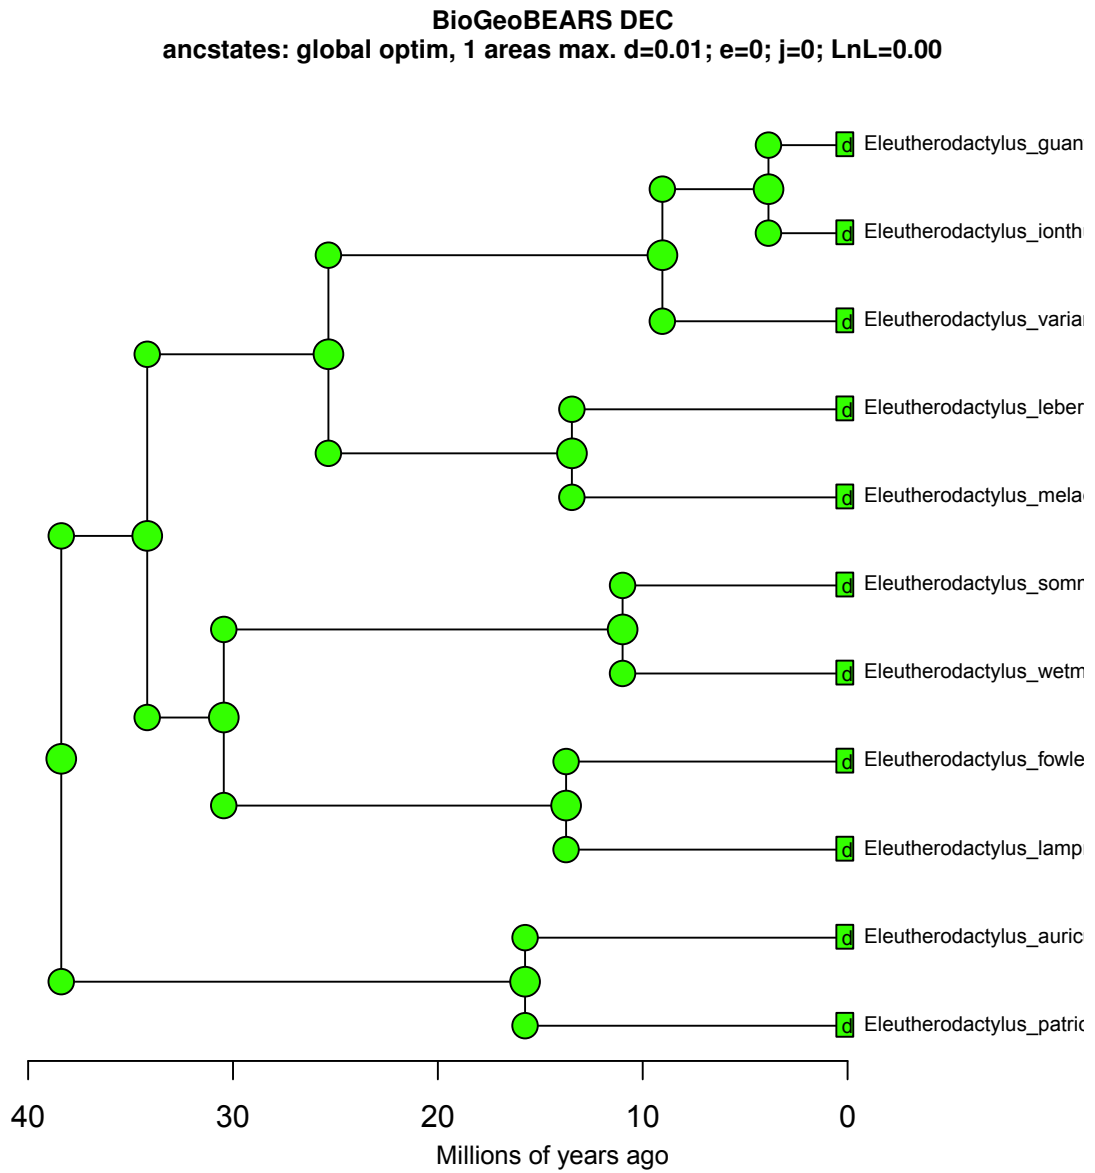

Figure S4: Clades of frogs

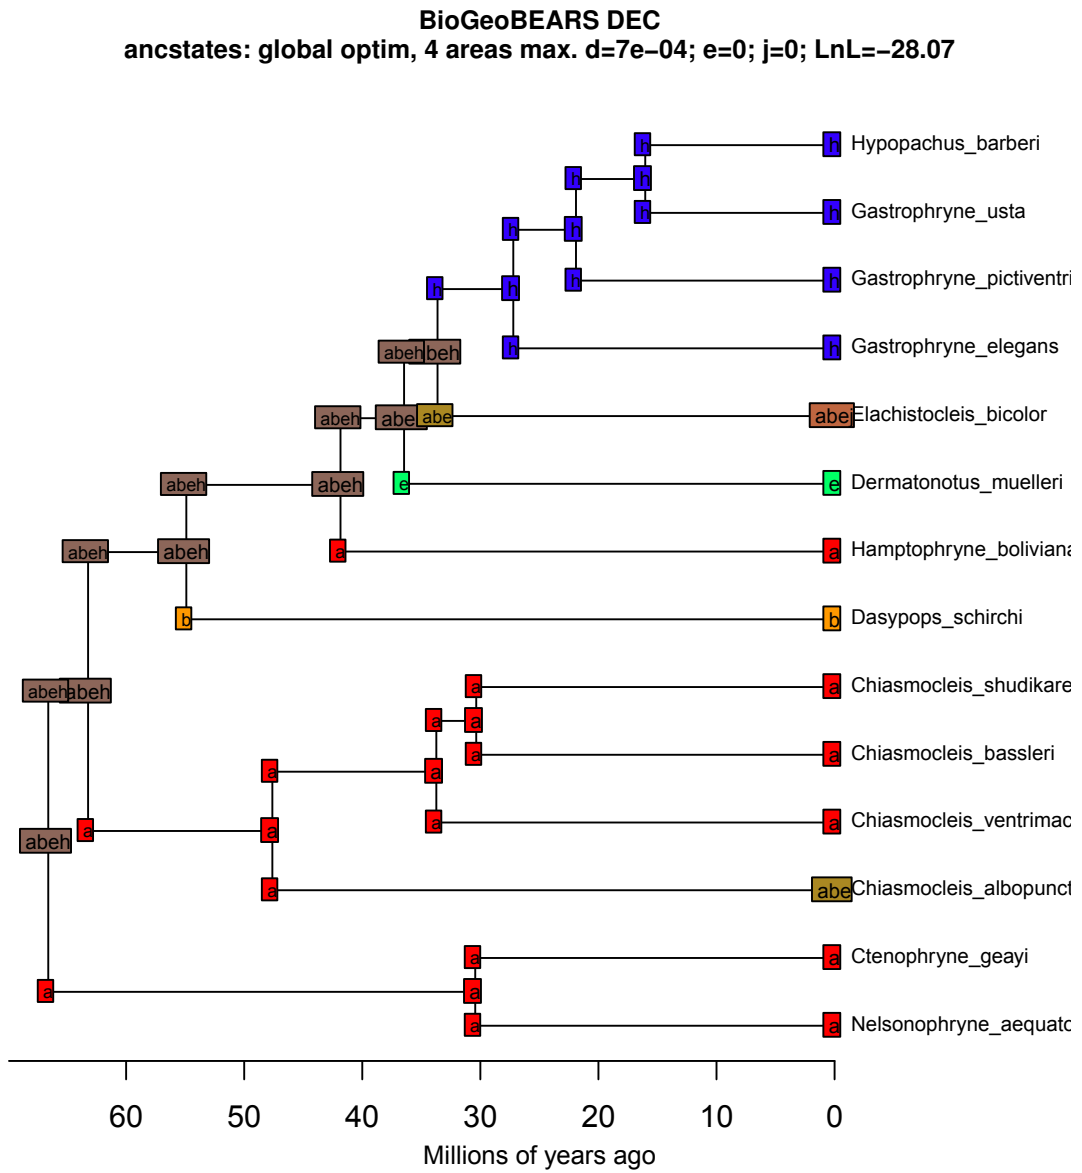

Figure S4: Clades of frogs

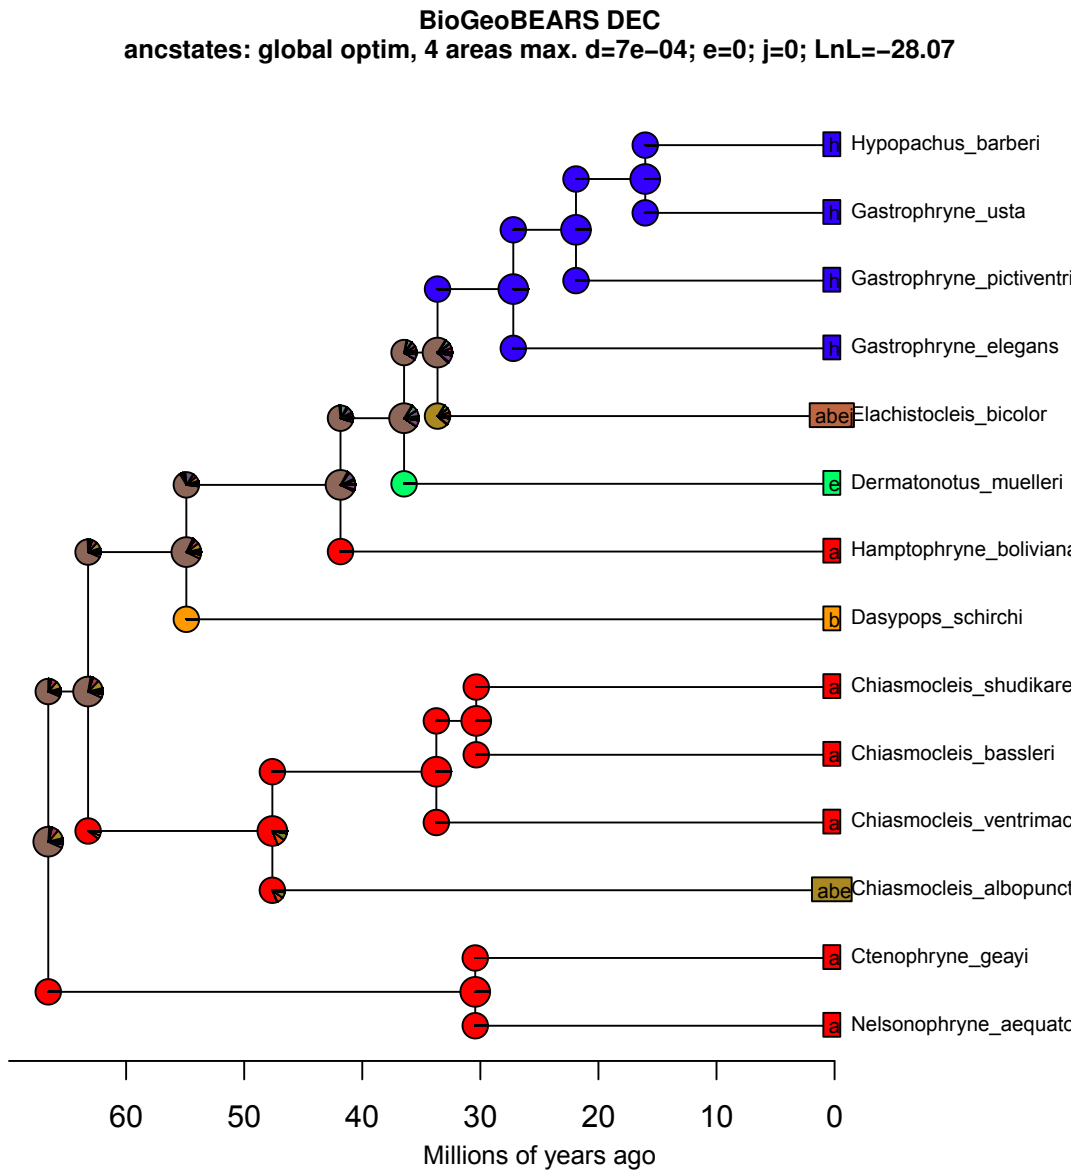

Figure S4: Clades of frogs

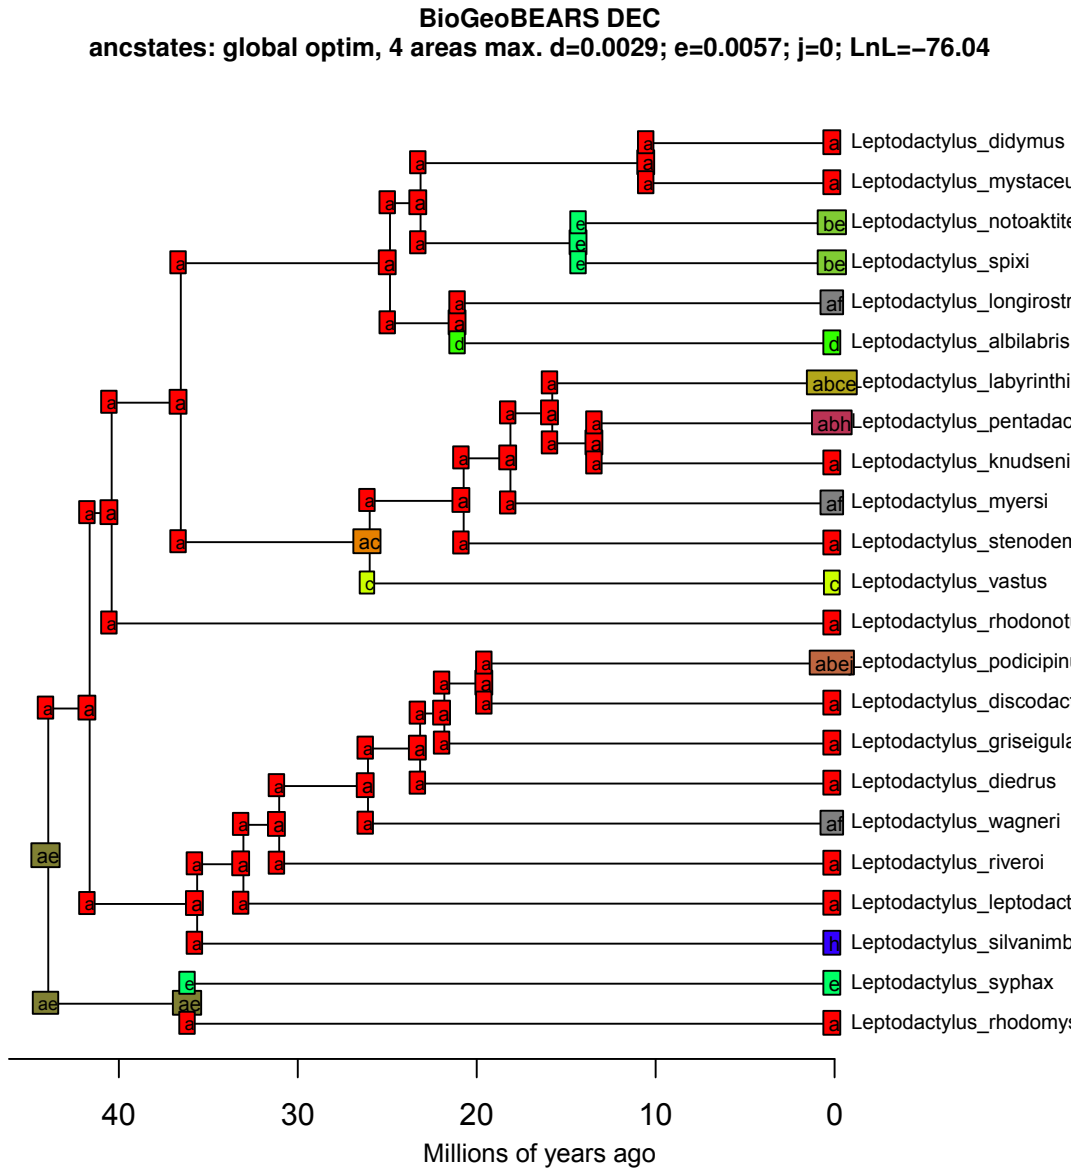



Figure S4: Clades of frogs

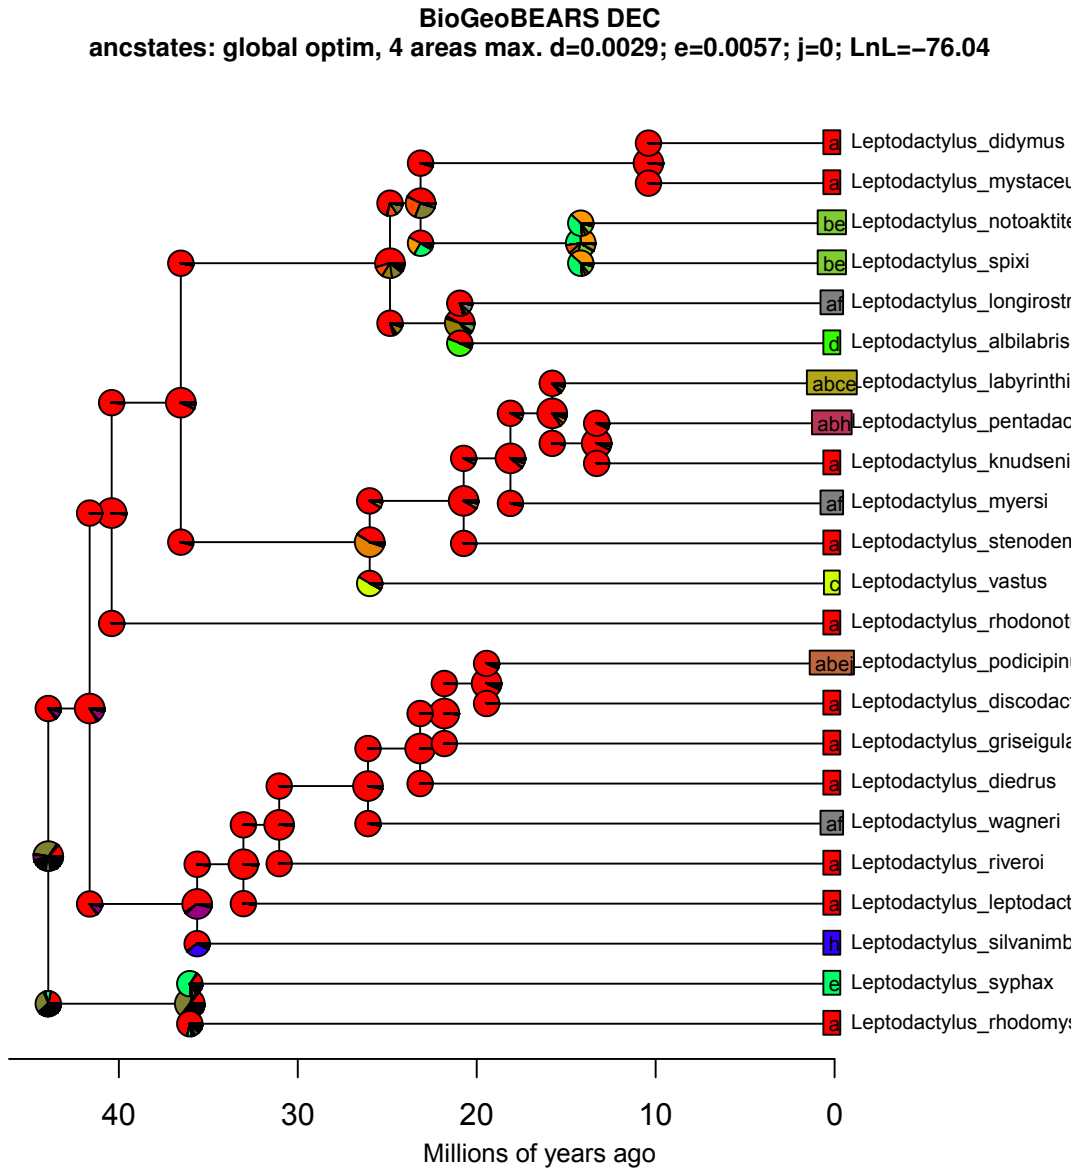

Figure S4: Clades of frogs

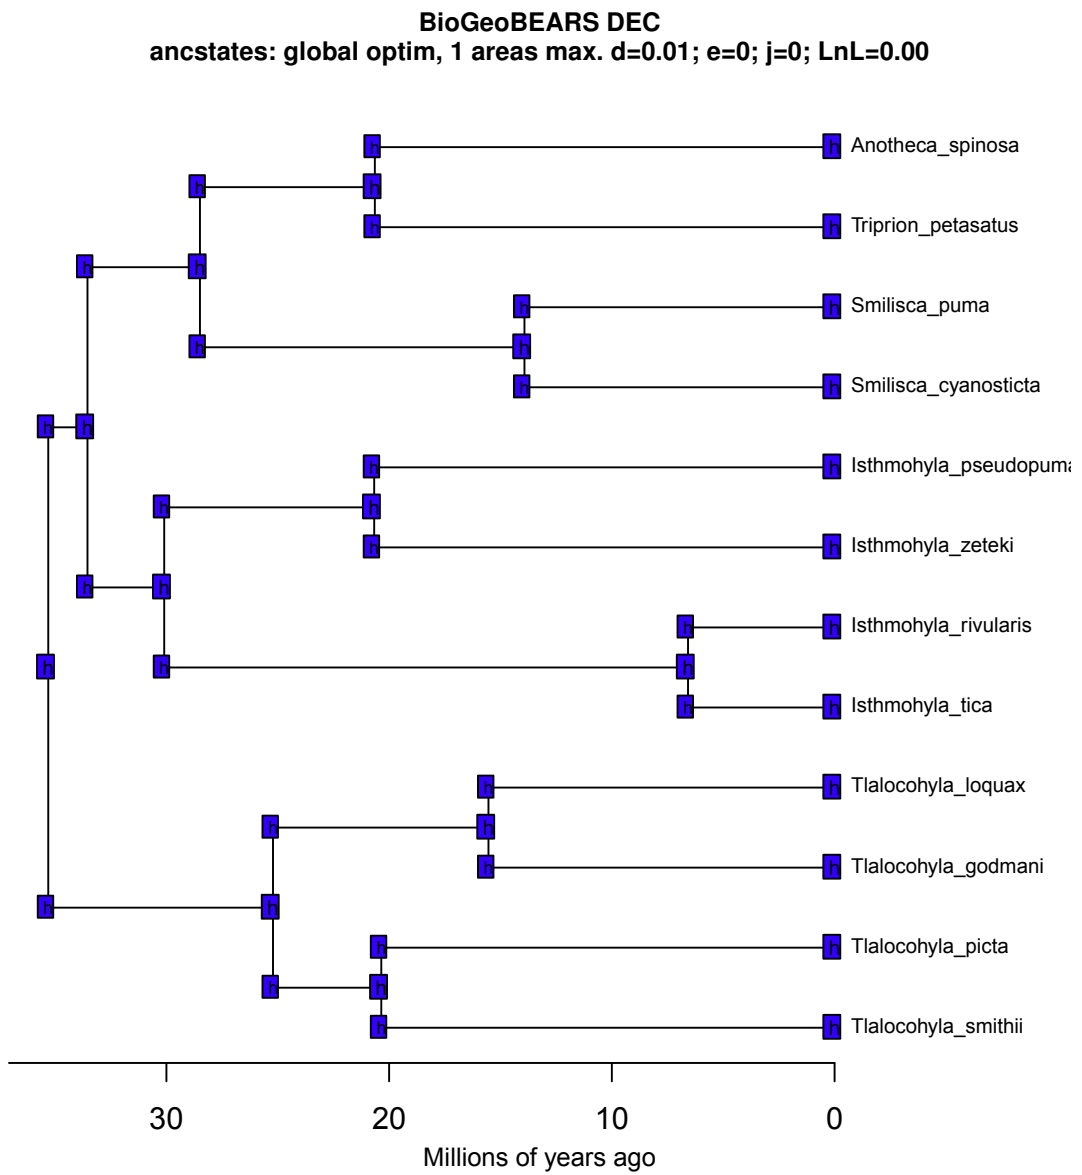

Figure S4: Clades of frogs

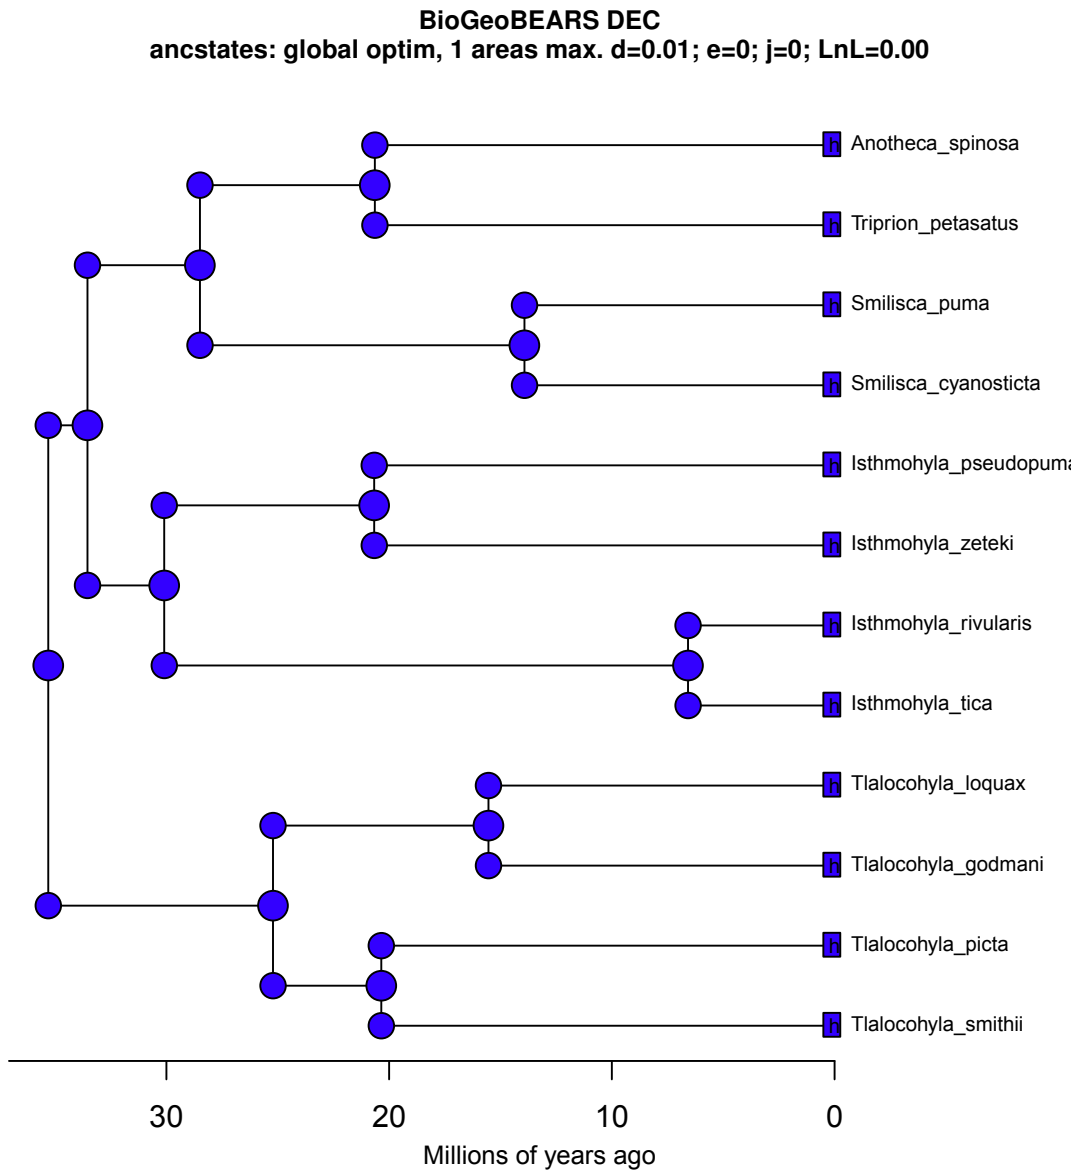

Figure S4: Clades of frogs

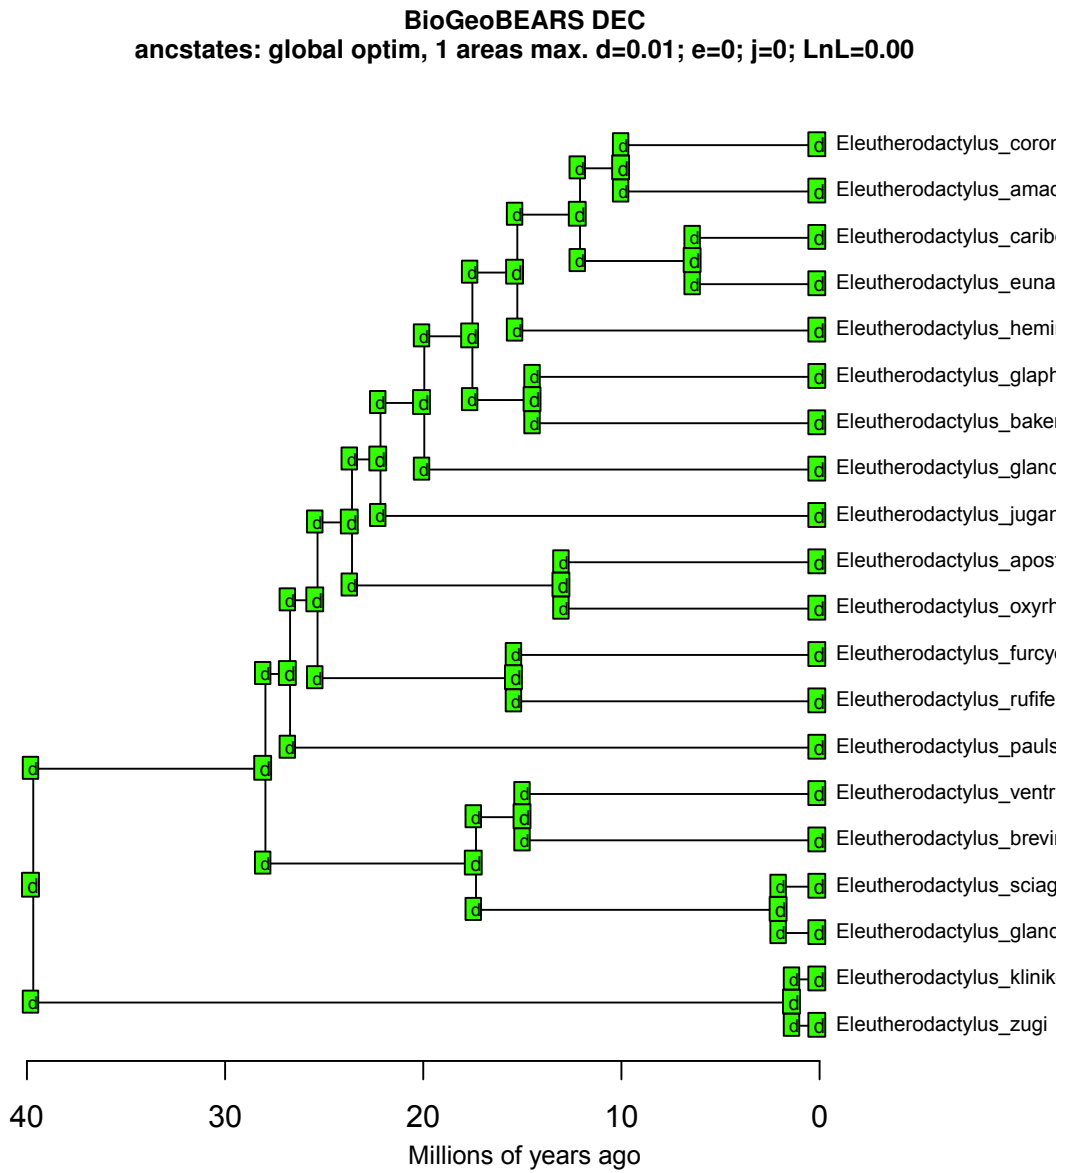

Figure S4: Clades of frogs

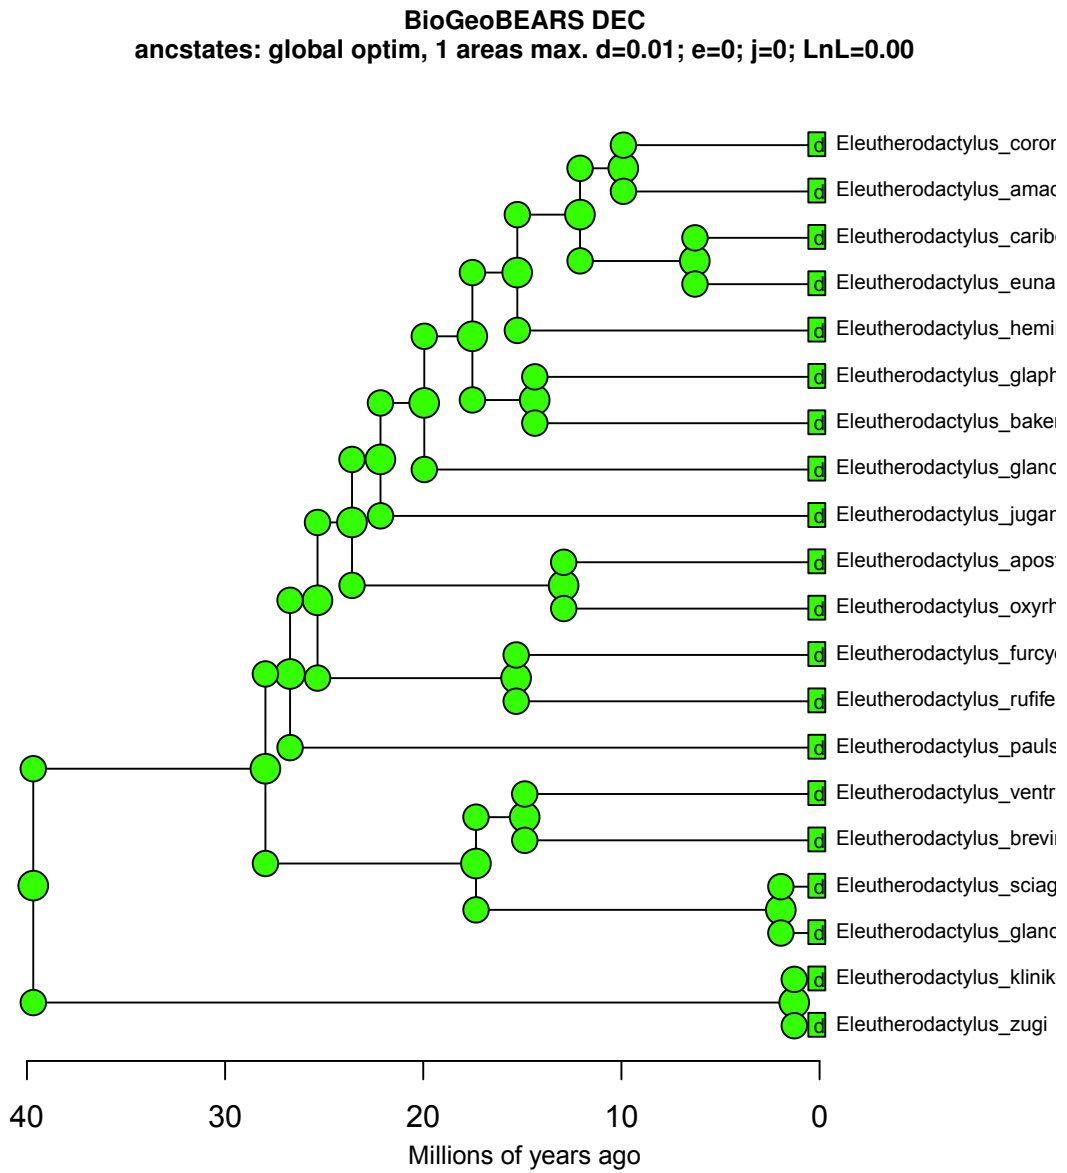

Figure S4: Clades of frogs

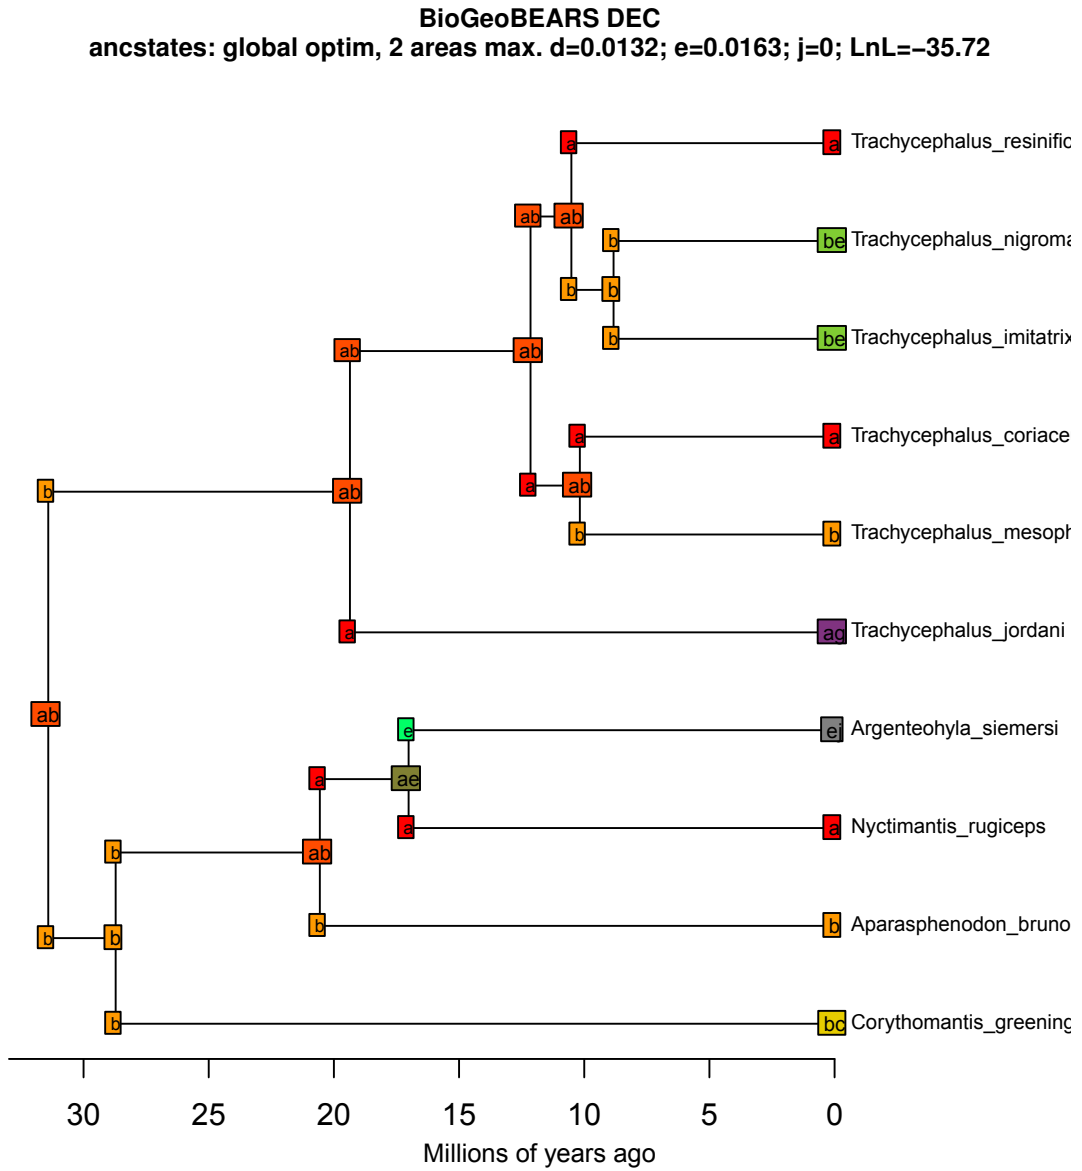

Figure S4: Clades of frogs

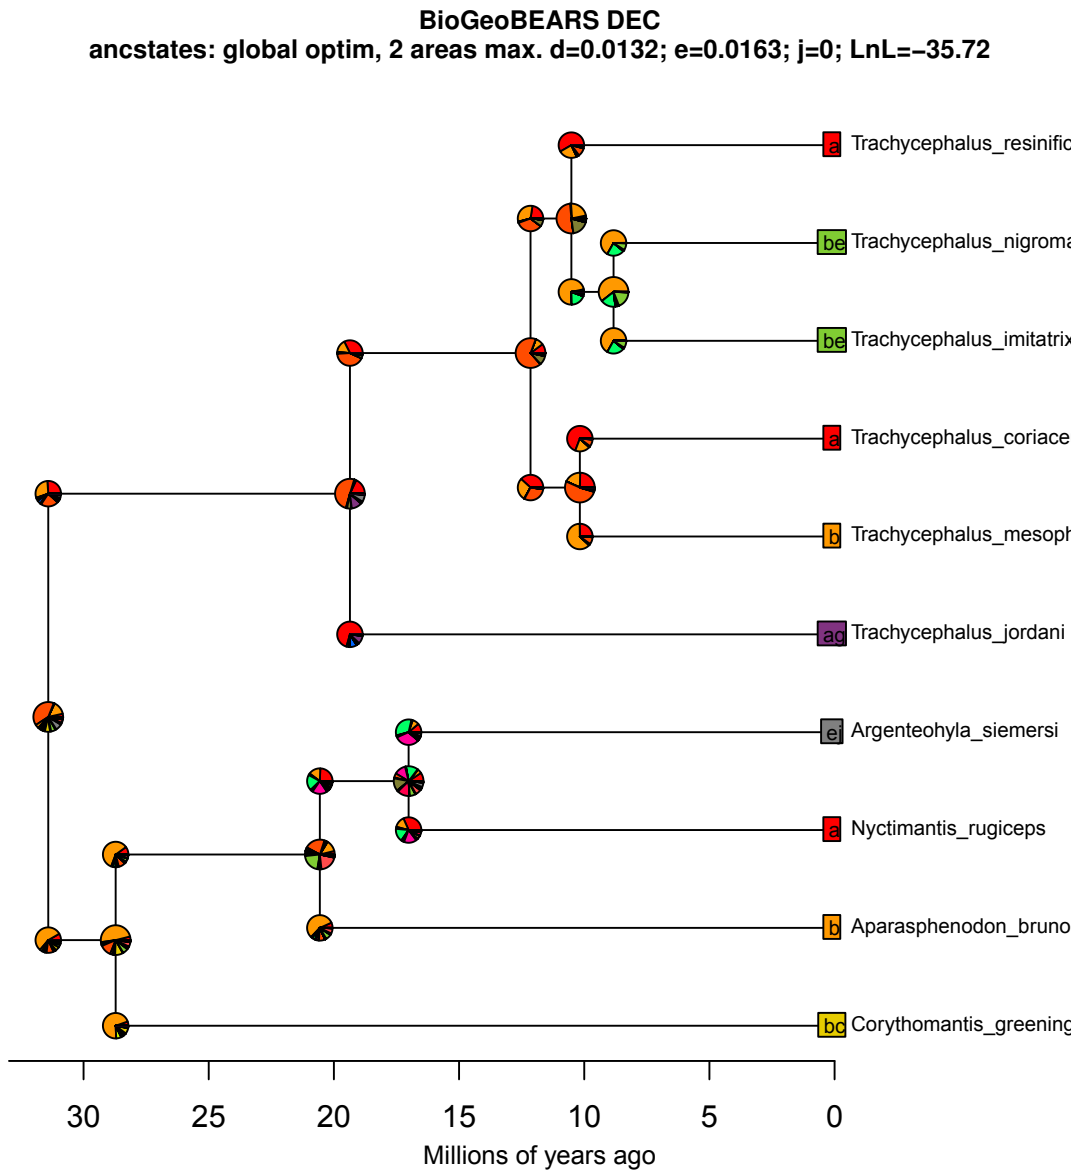

Figure S4: Clades of frogs

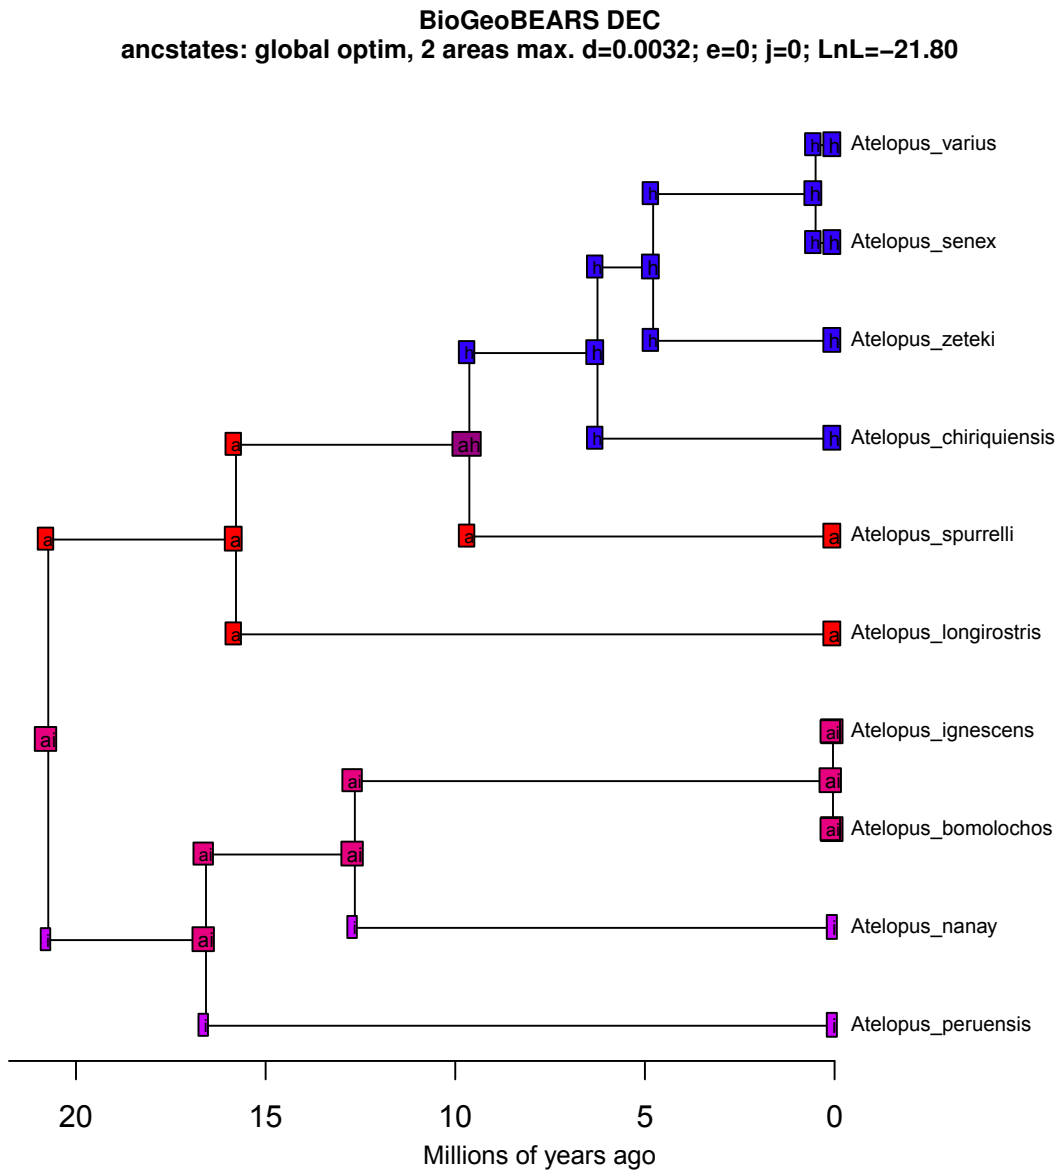



Figure S4: Clades of frogs

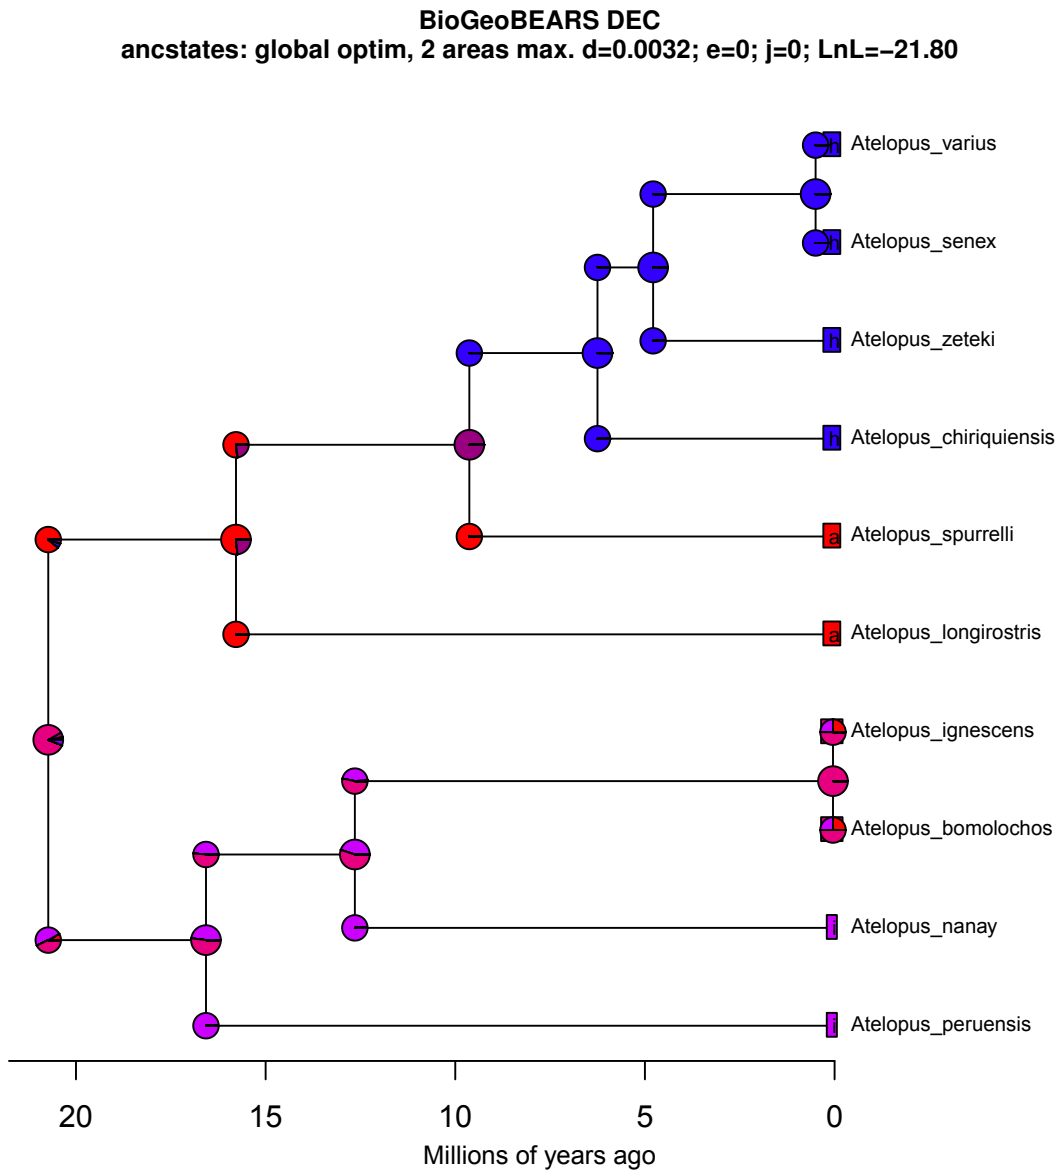

Figure S4: Clades of frogs

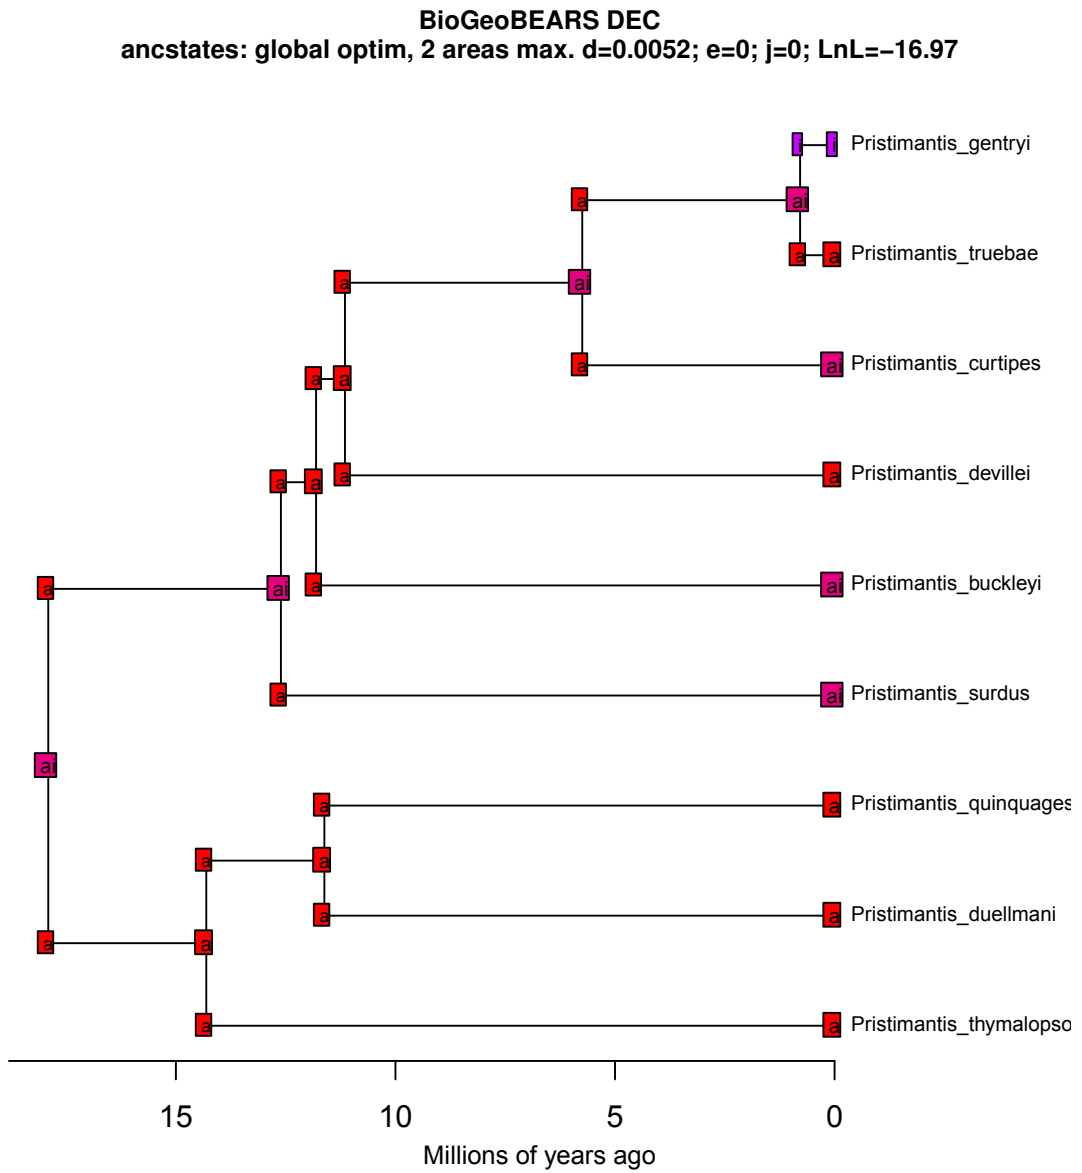

Figure S4: Clades of frogs

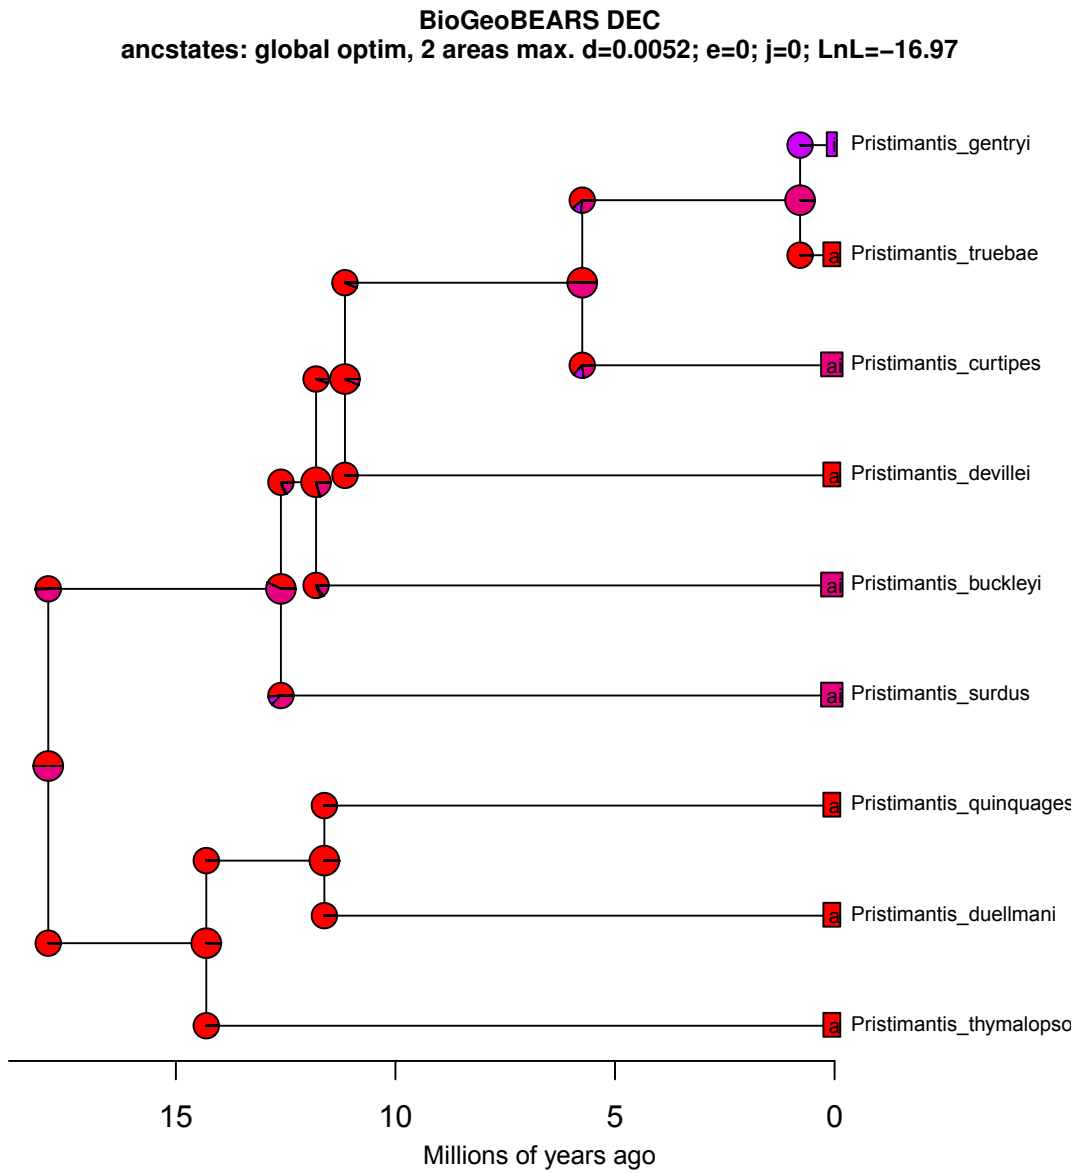

Figure S4: Clades of frogs

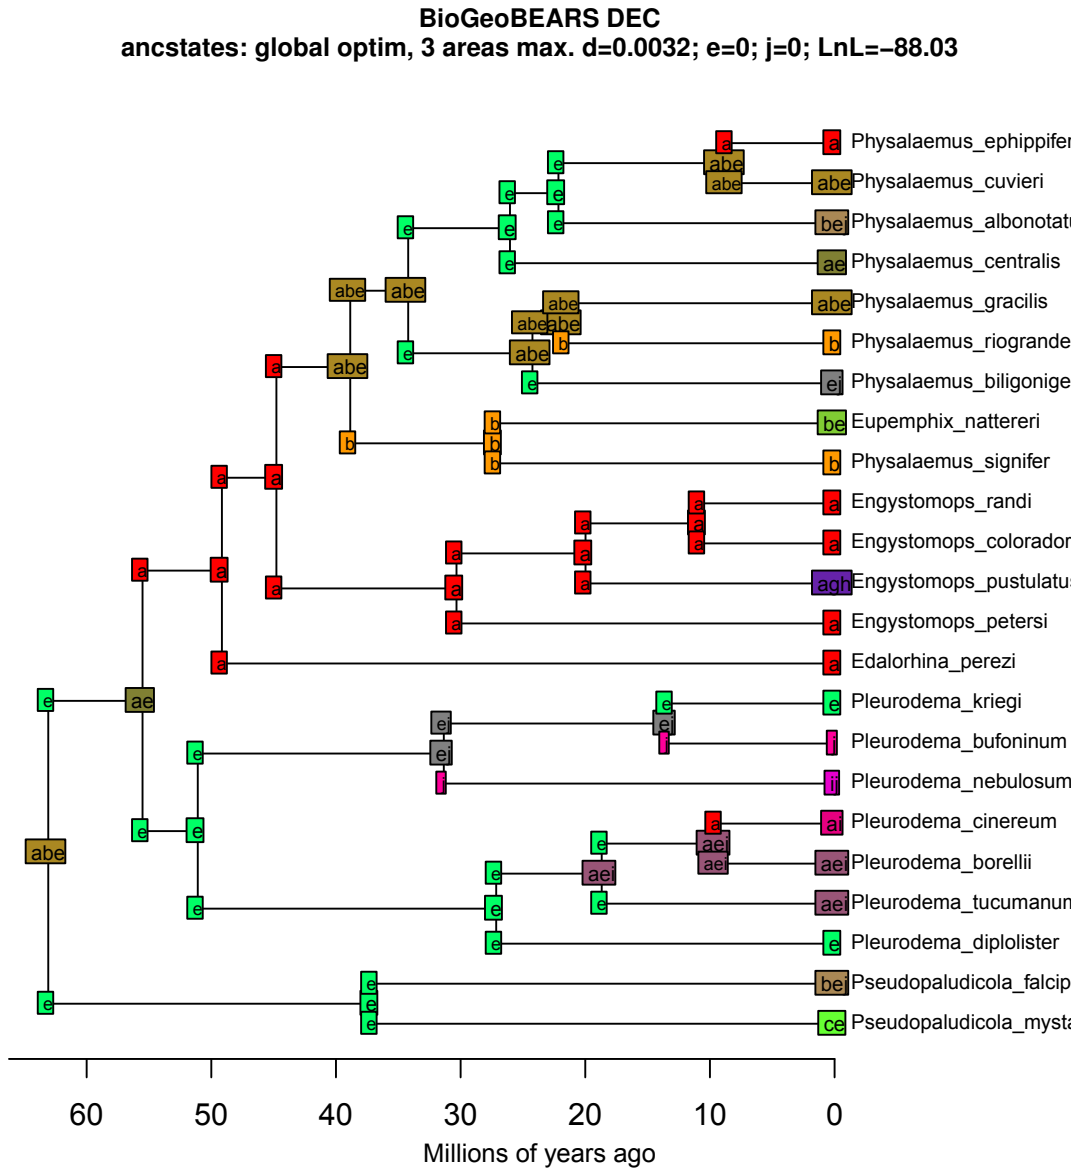

Figure S4: Clades of frogs

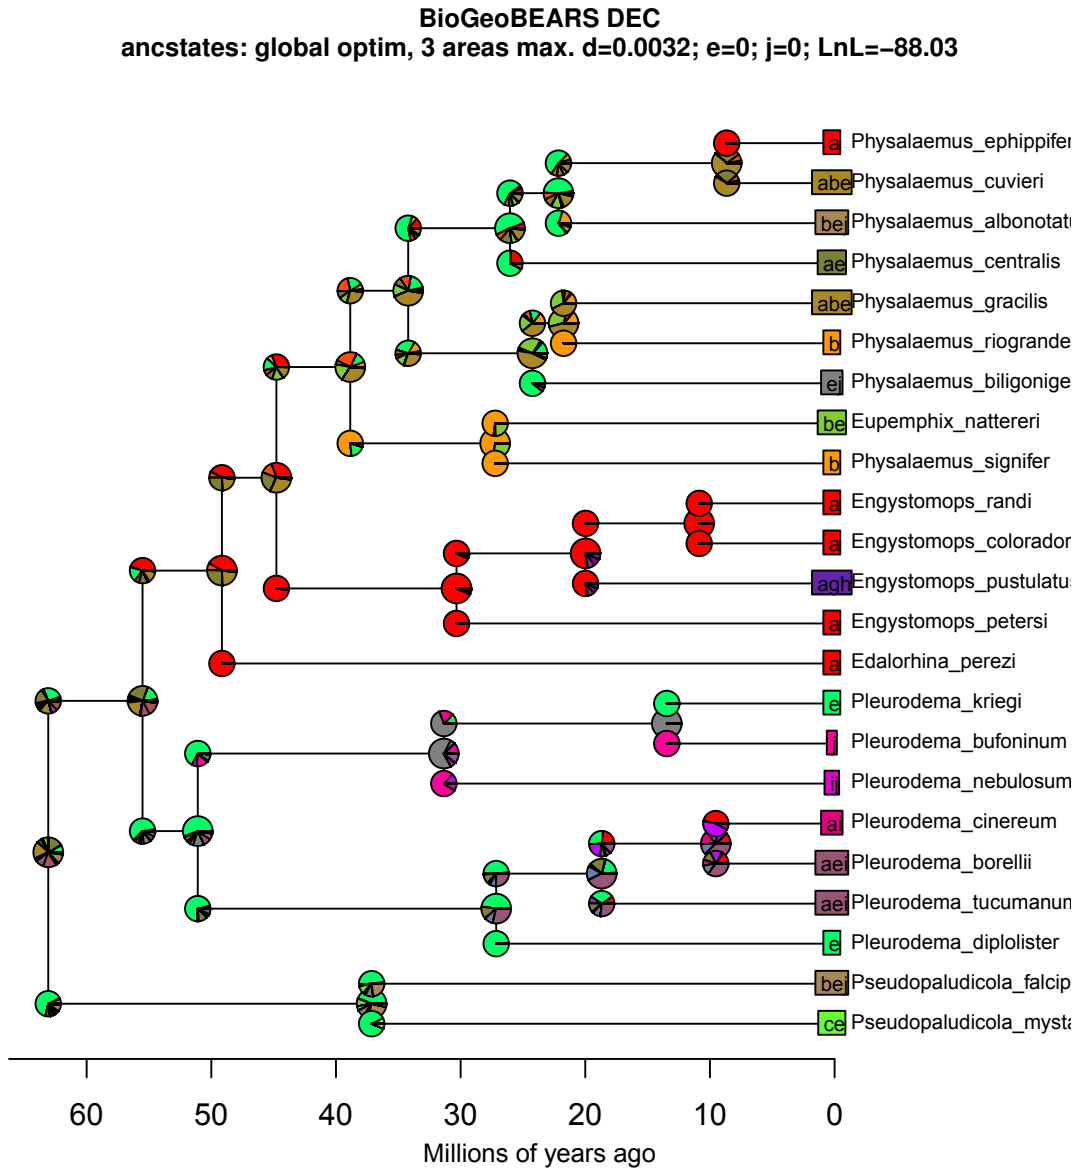

Figure S5: Clades of birds

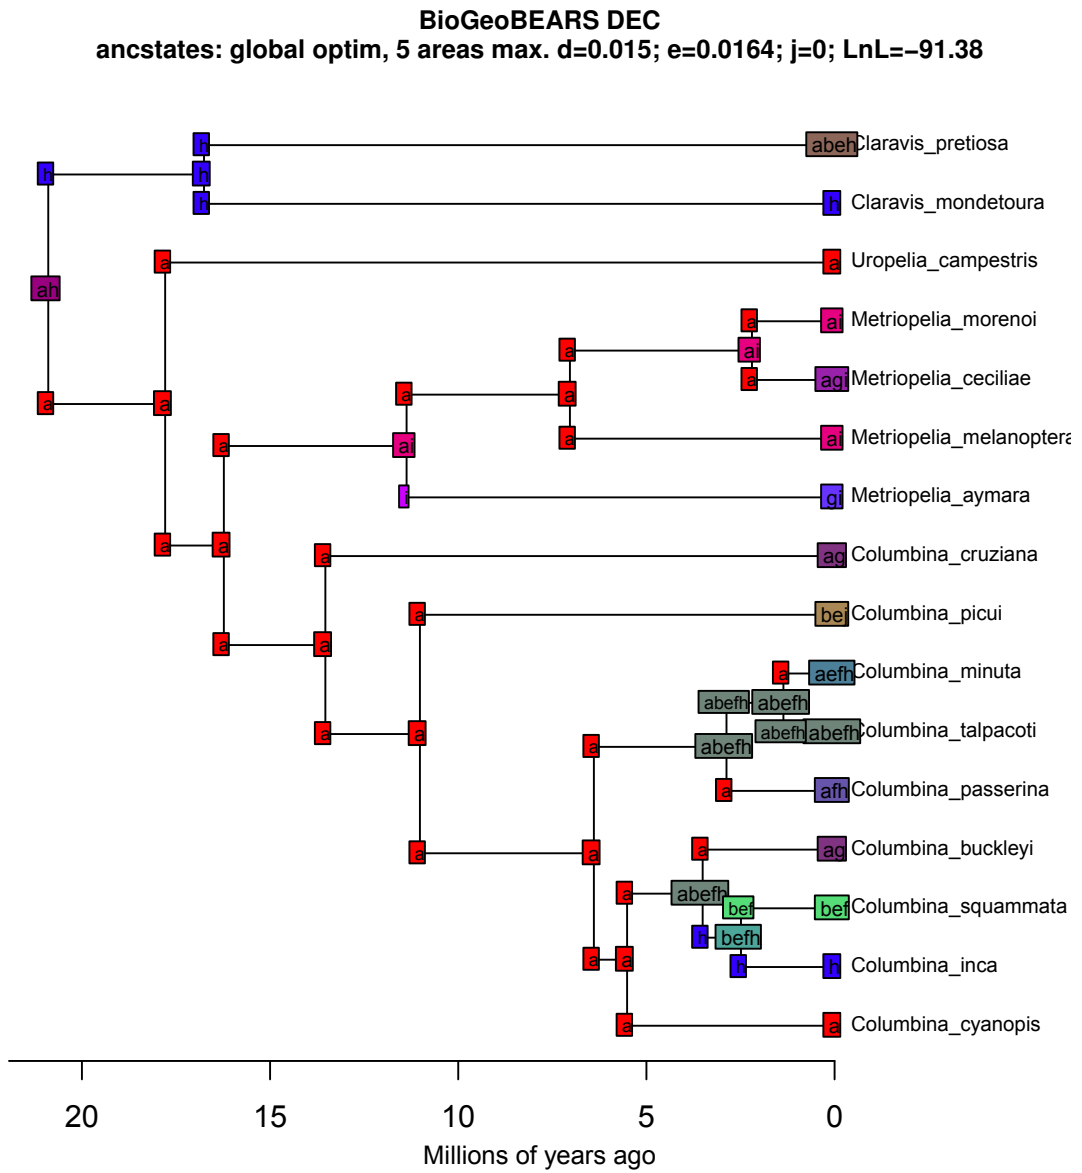

Figure S5: Clades of birds

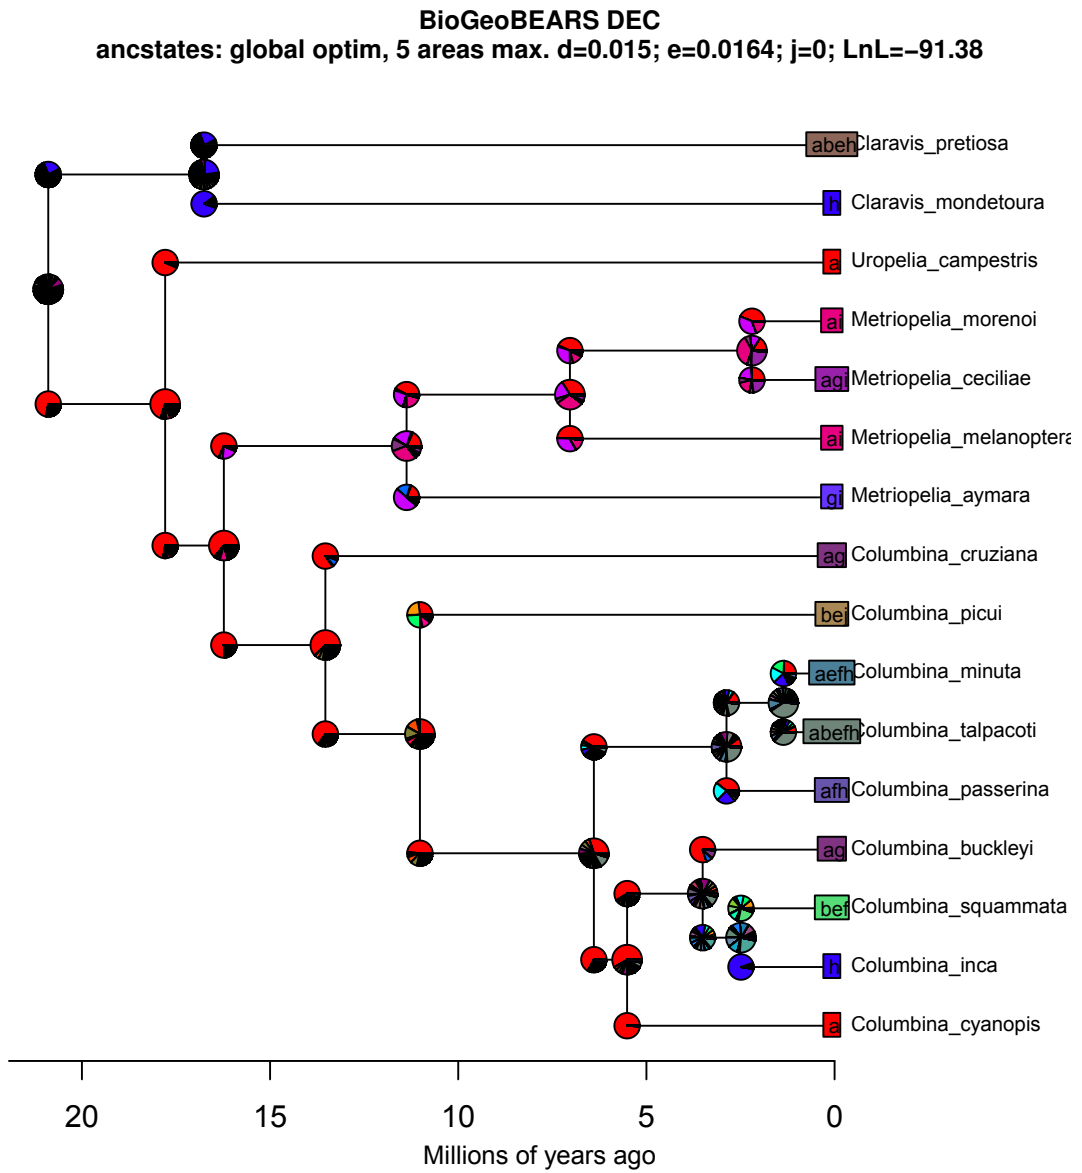

Figure S5: Clades of birds

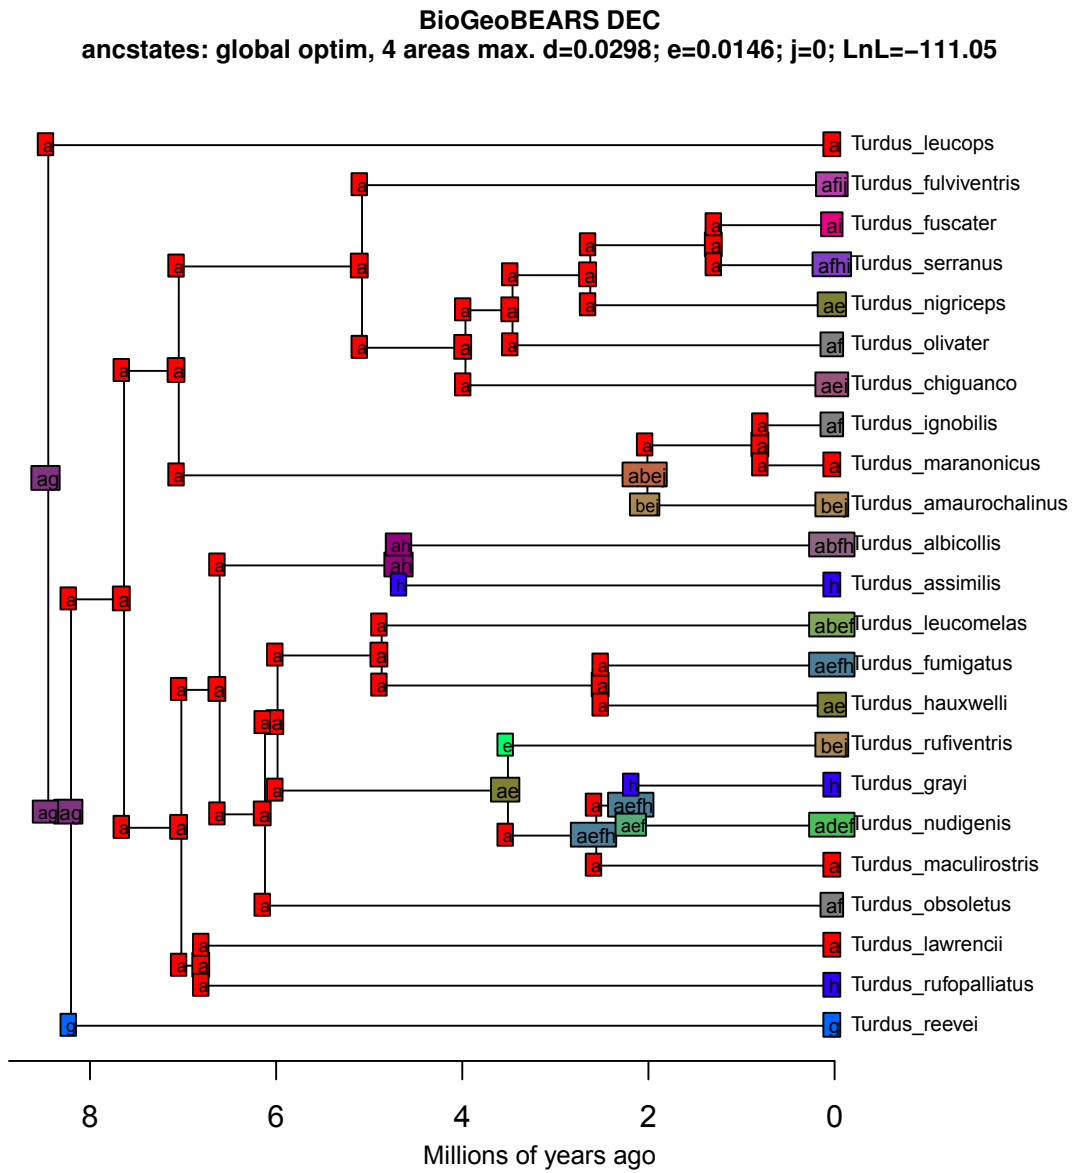



Figure S5: Clades of birds

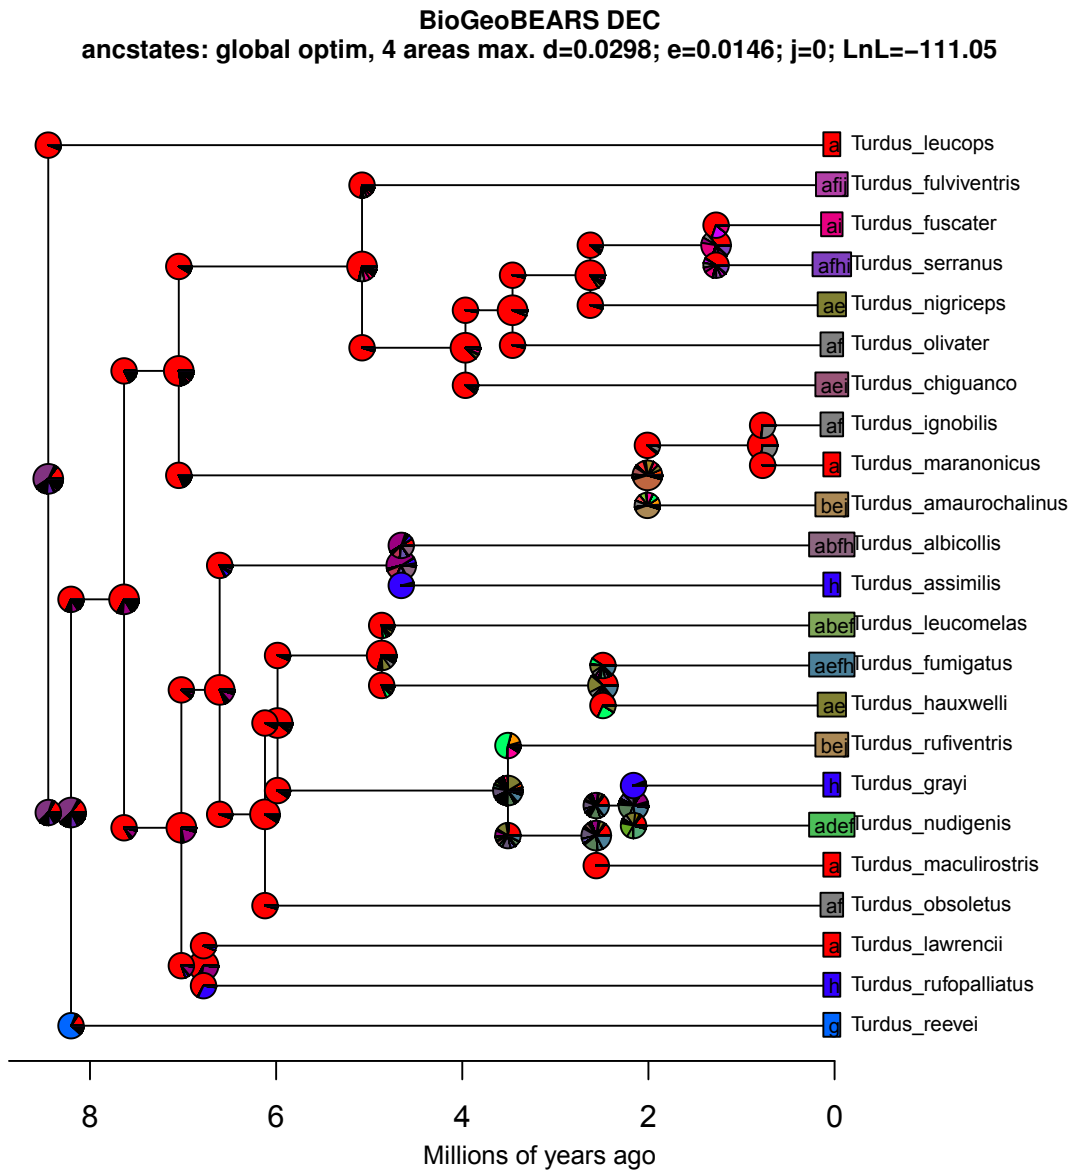

Figure S5: Clades of birds

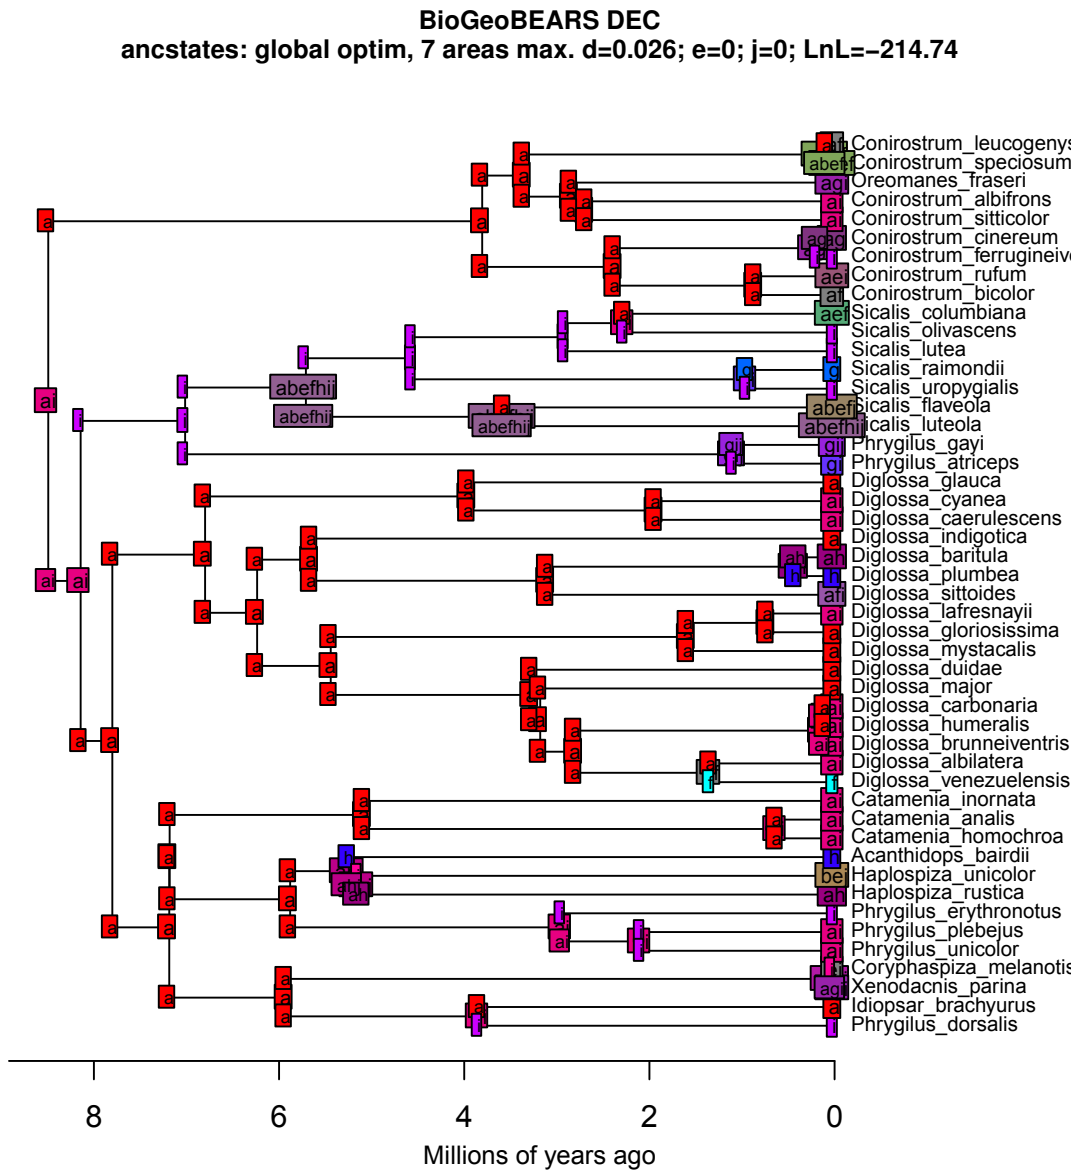

Figure S5: Clades of birds

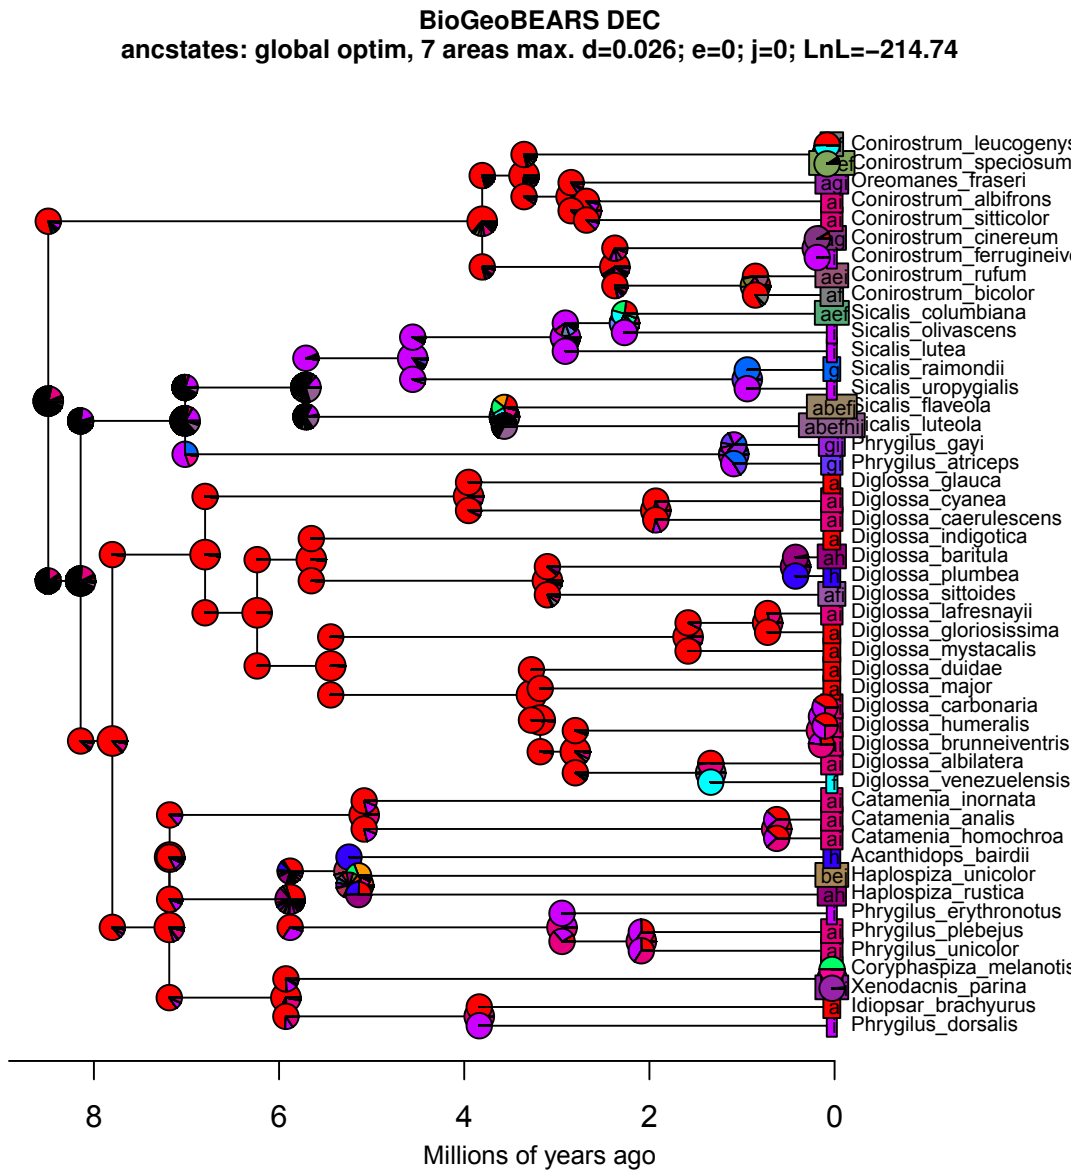

Figure S5: Clades of birds

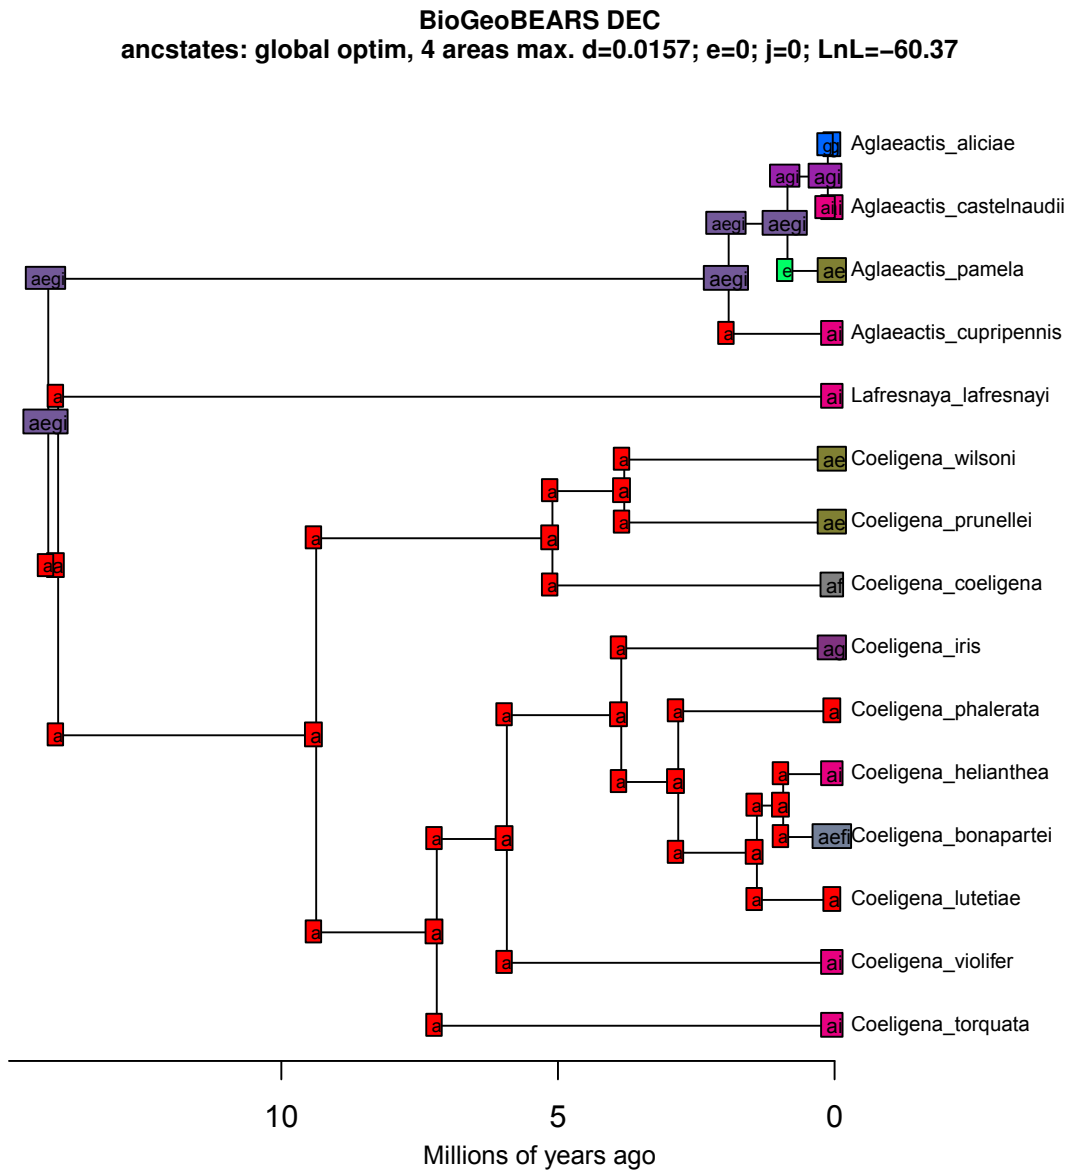

Figure S5: Clades of birds

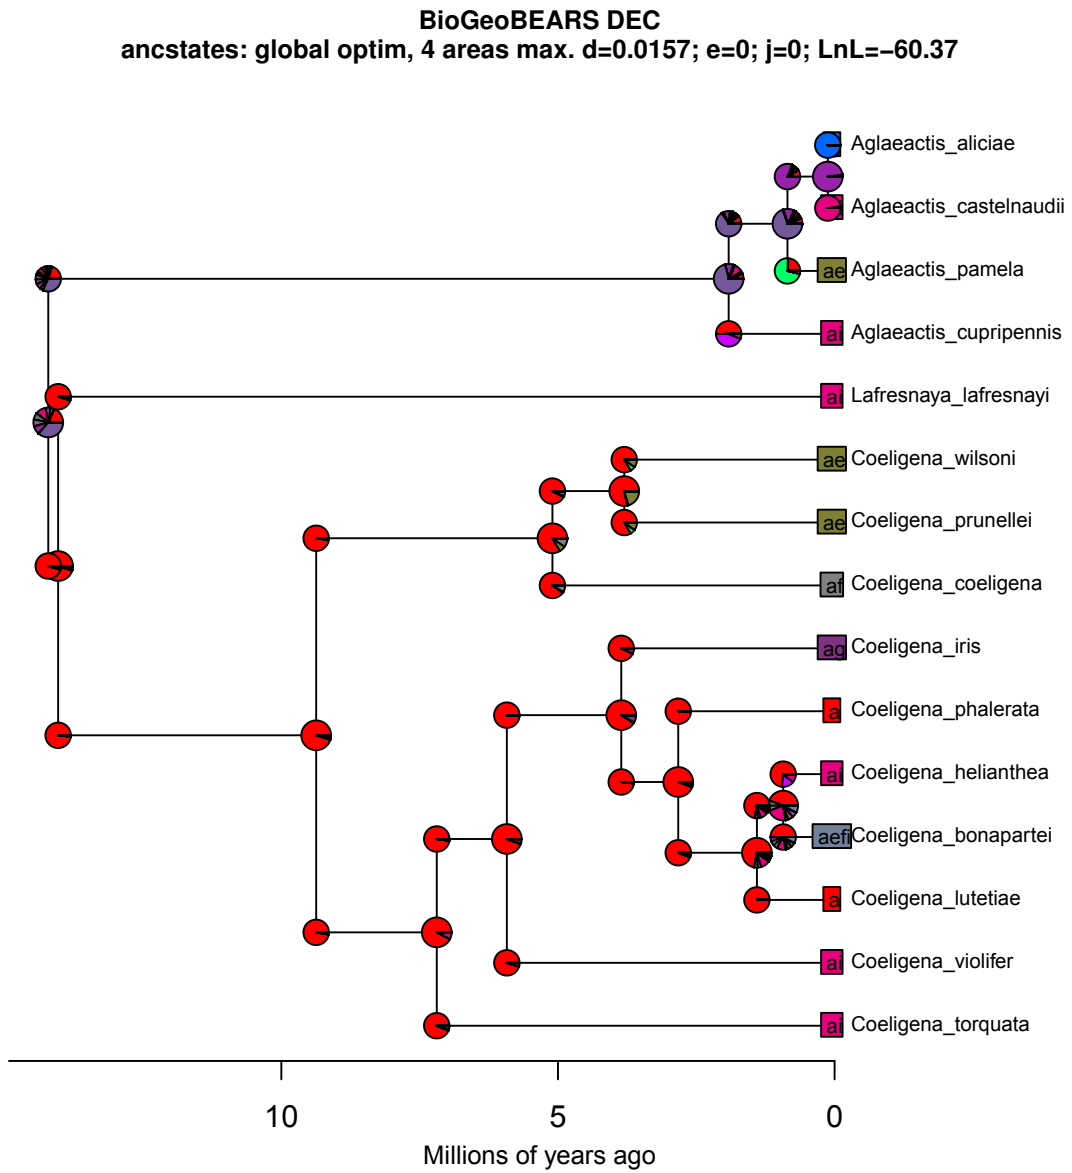

Figure S5: Clades of birds

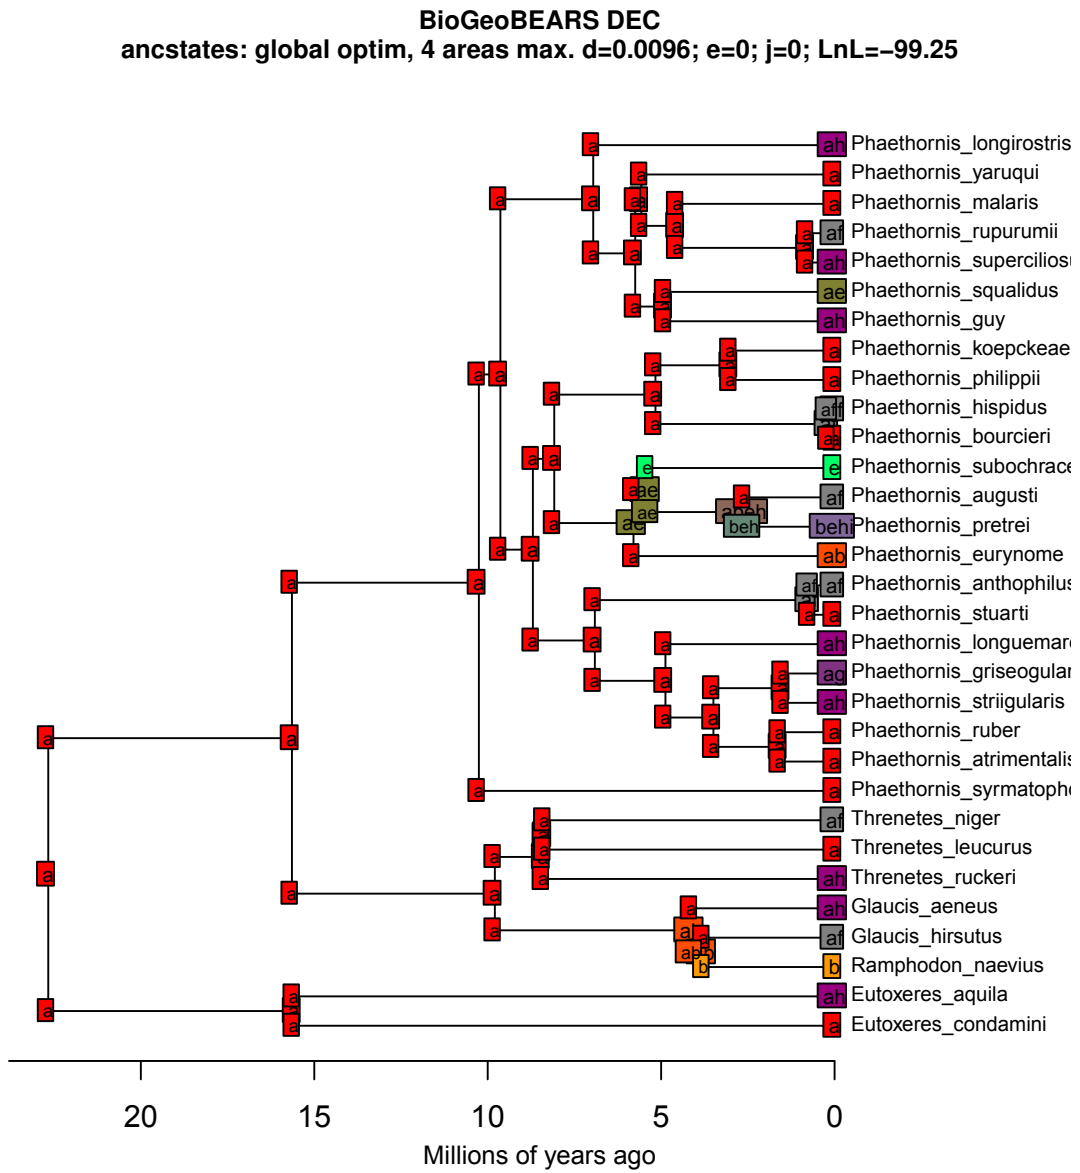

Figure S5: Clades of birds

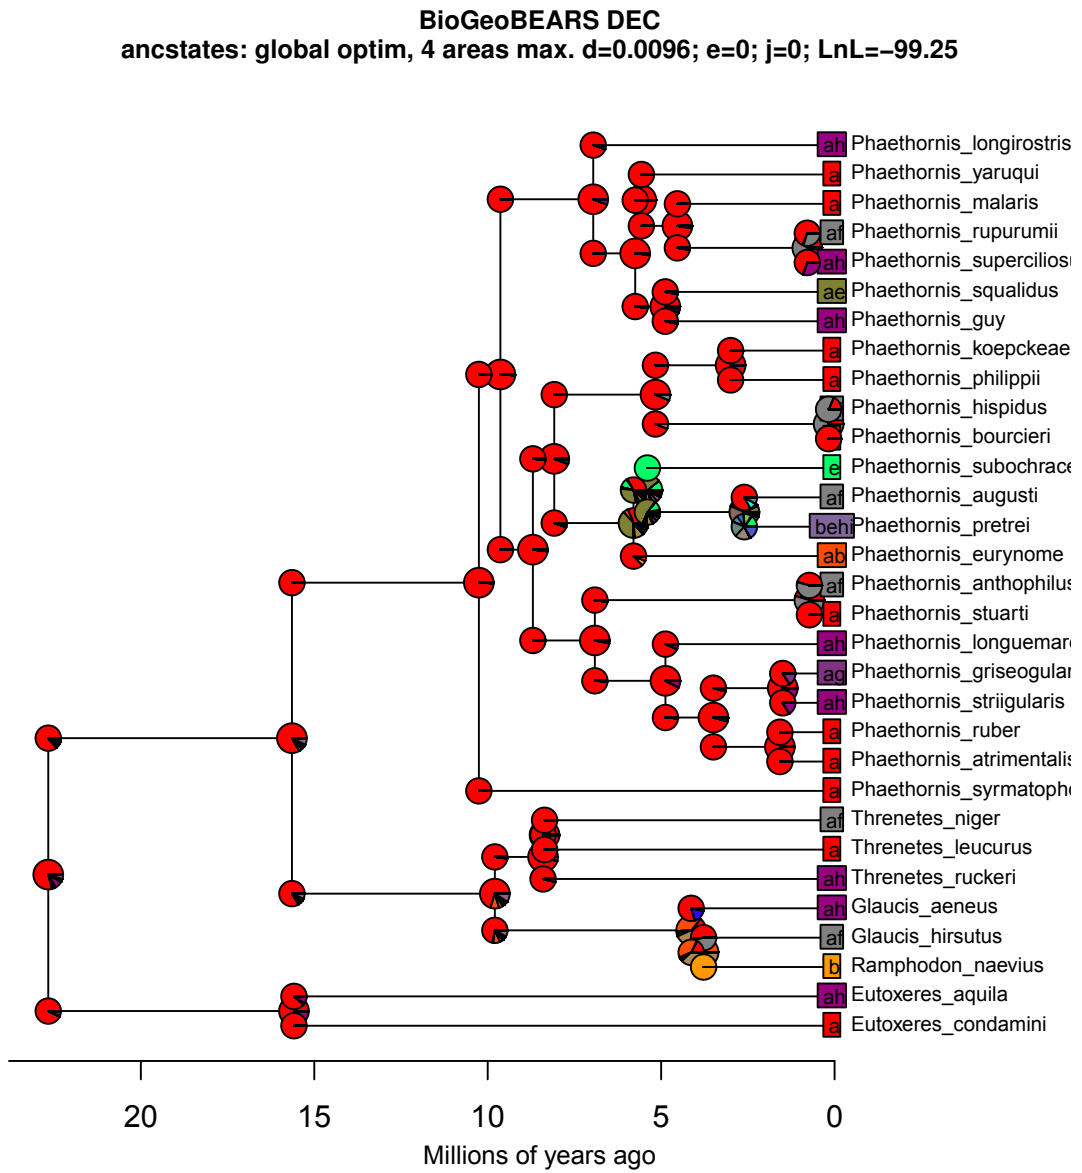

Figure S5: Clades of birds

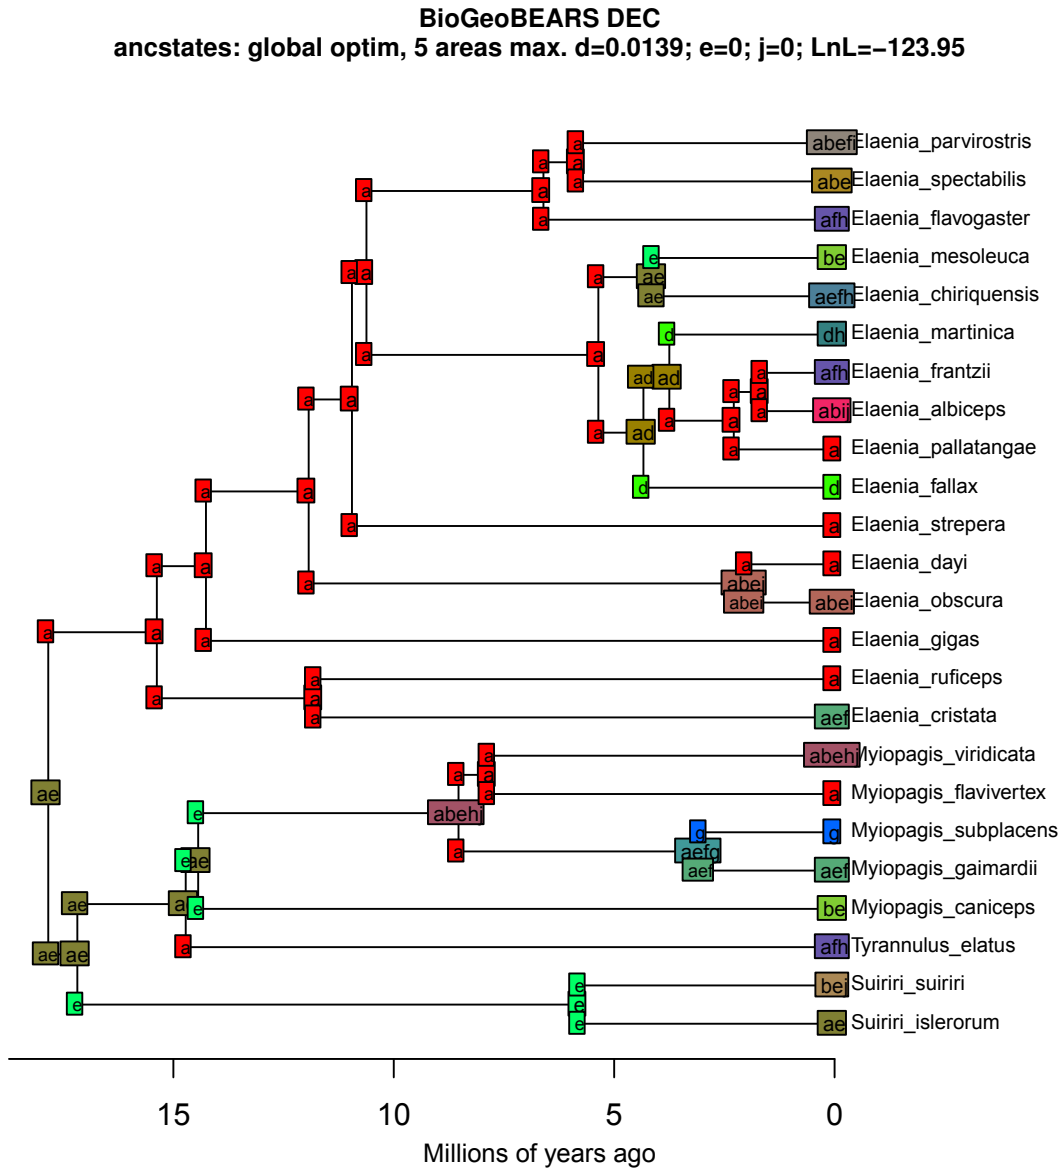



Figure S5: Clades of birds

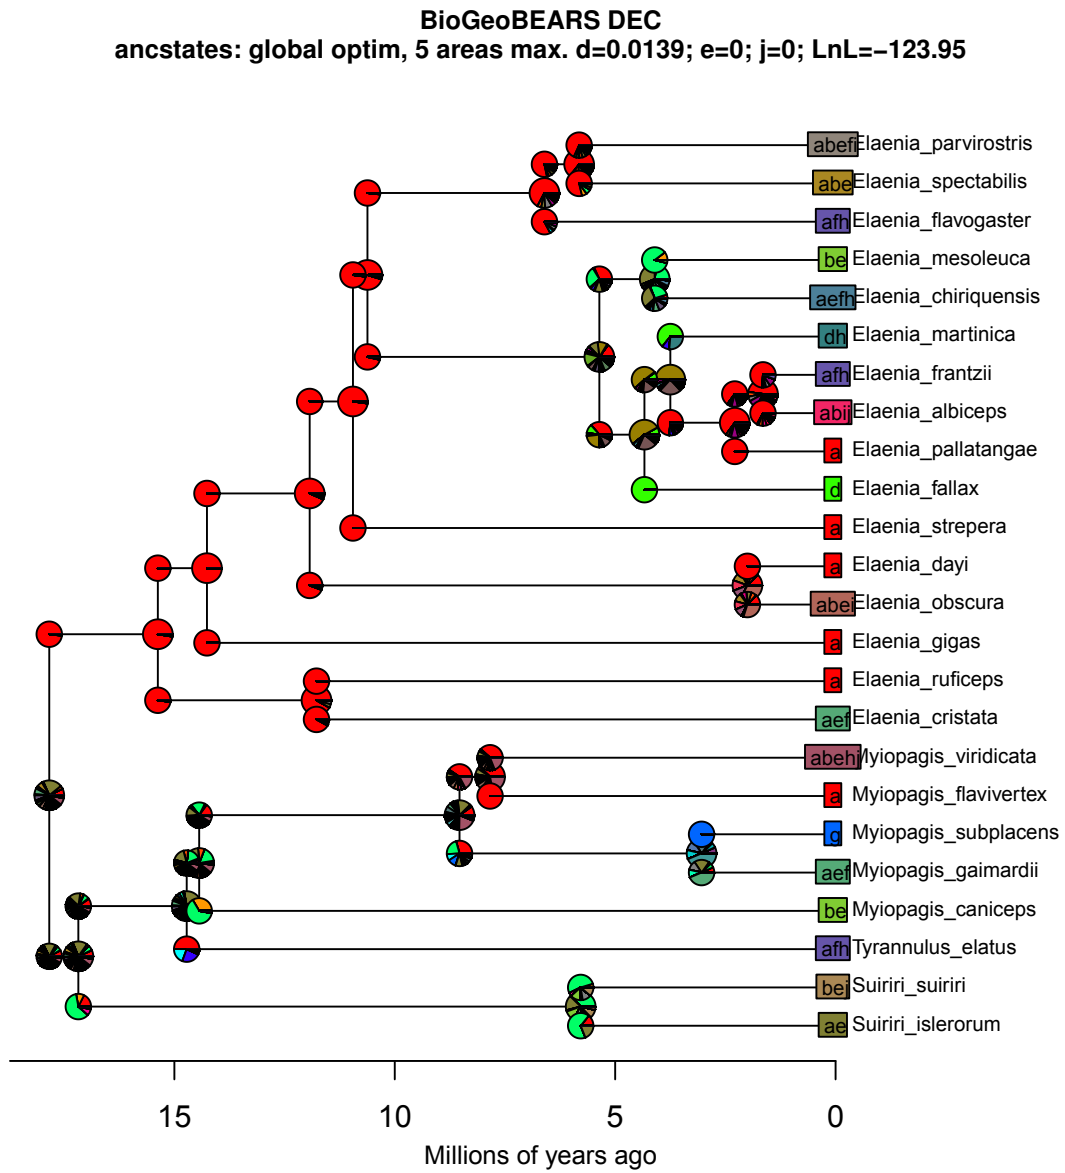

Figure S5: Clades of birds

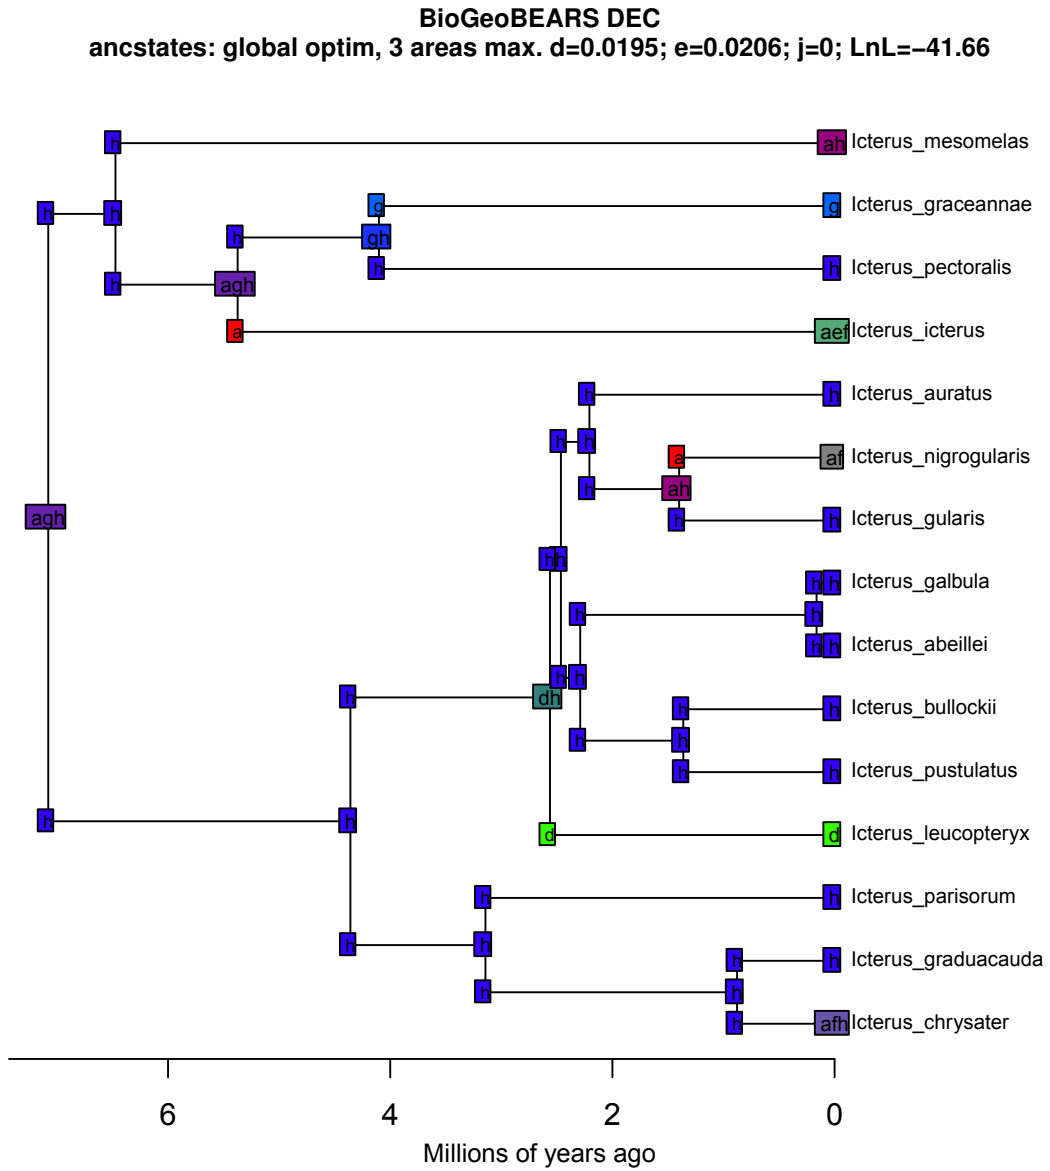

Figure S5: Clades of birds

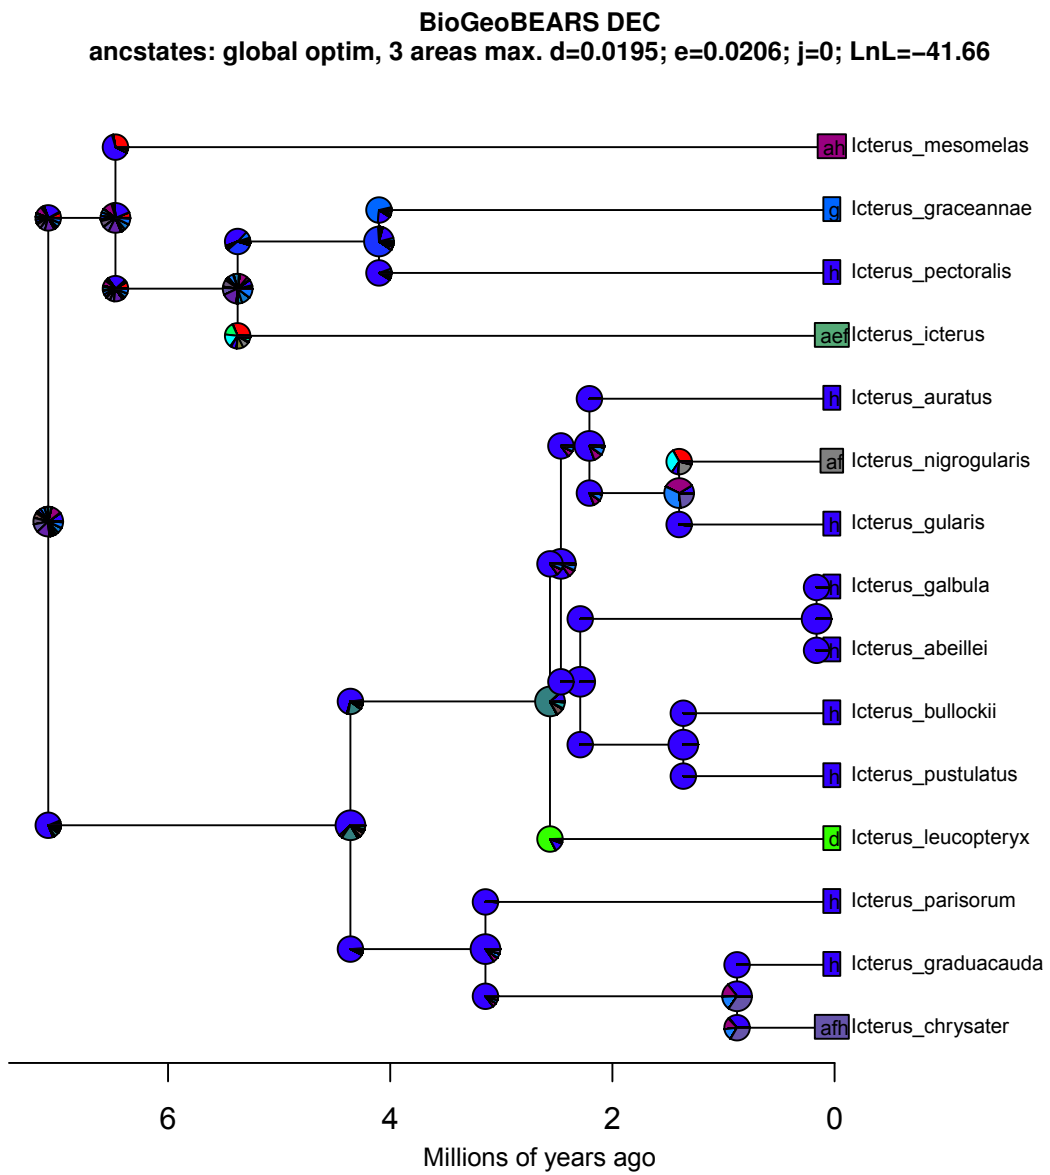

Figure S5: Clades of birds

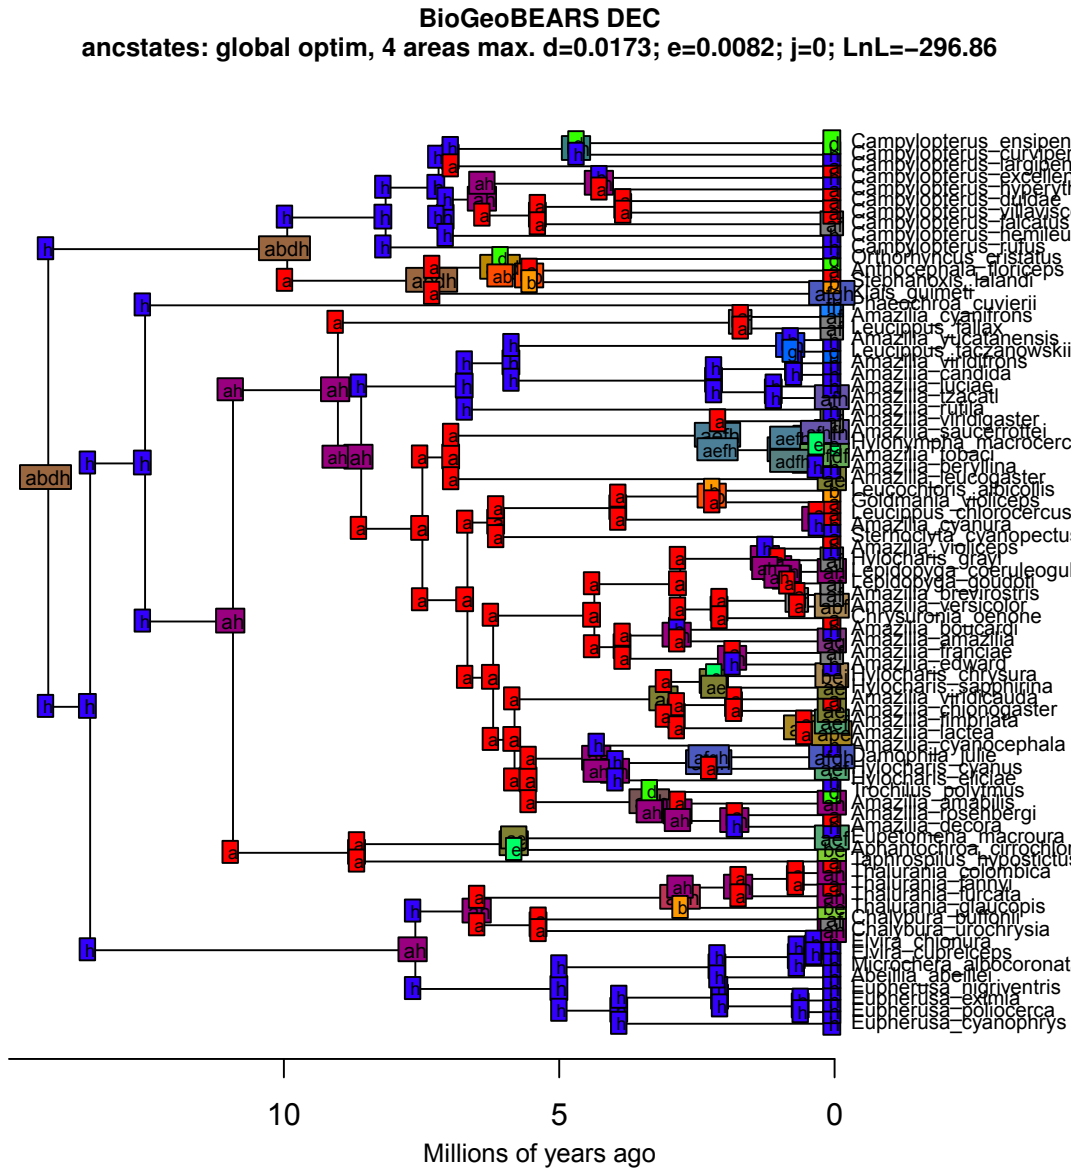



Figure S5: Clades of birds

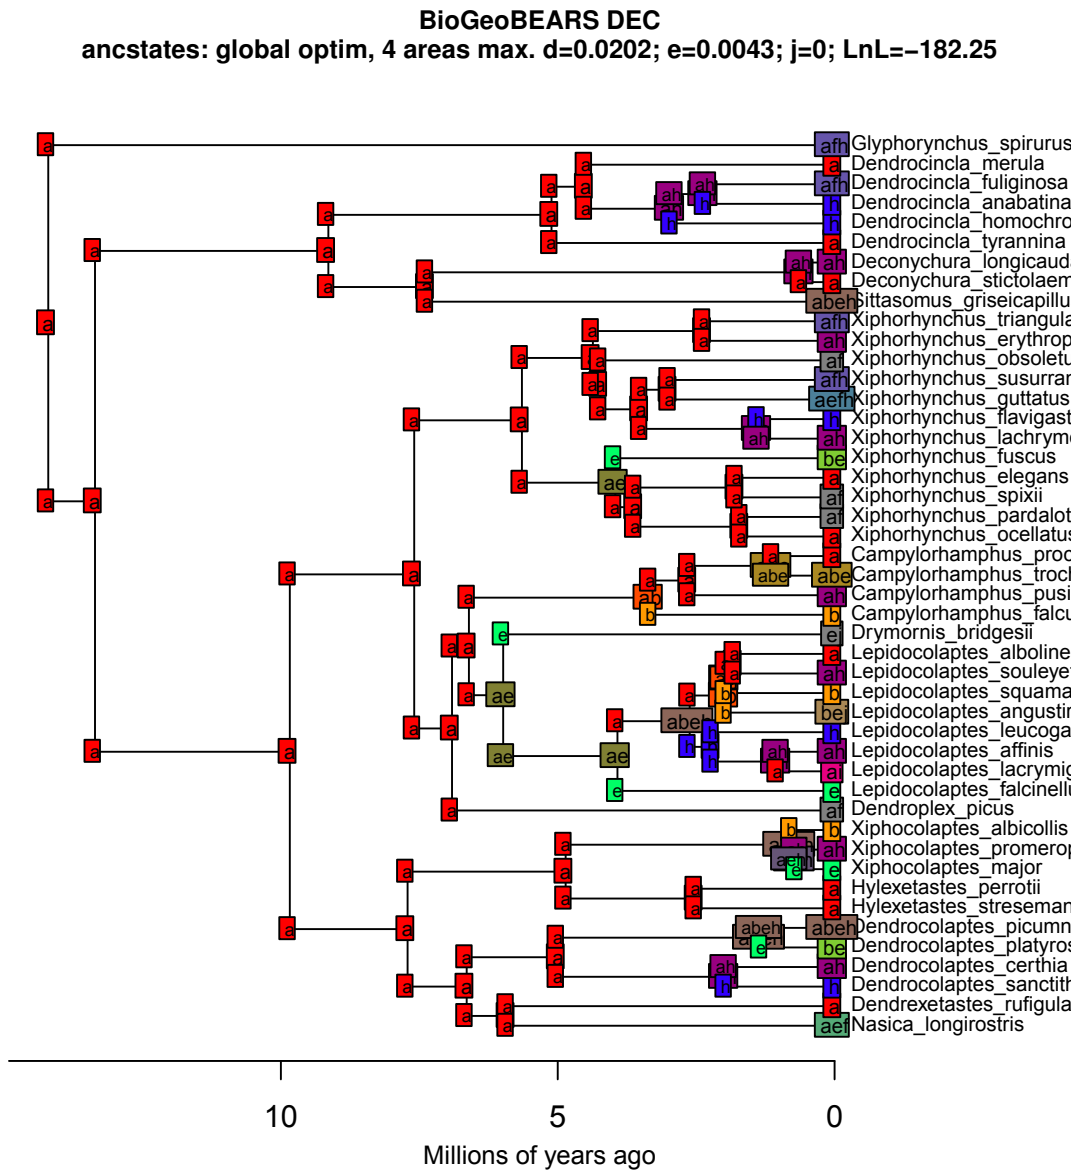

Figure S5: Clades of birds

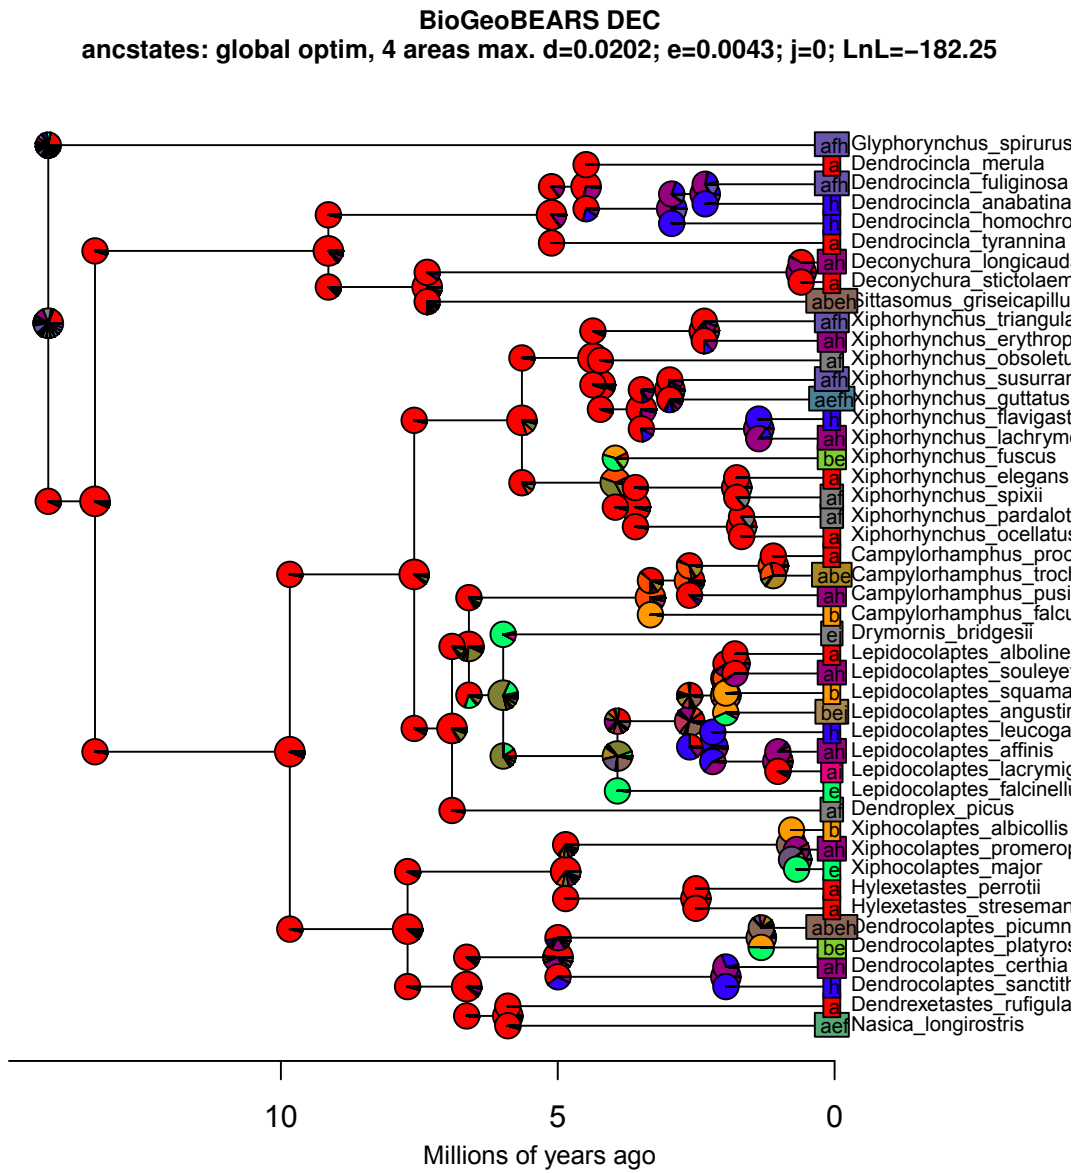

Figure S5: Clades of birds

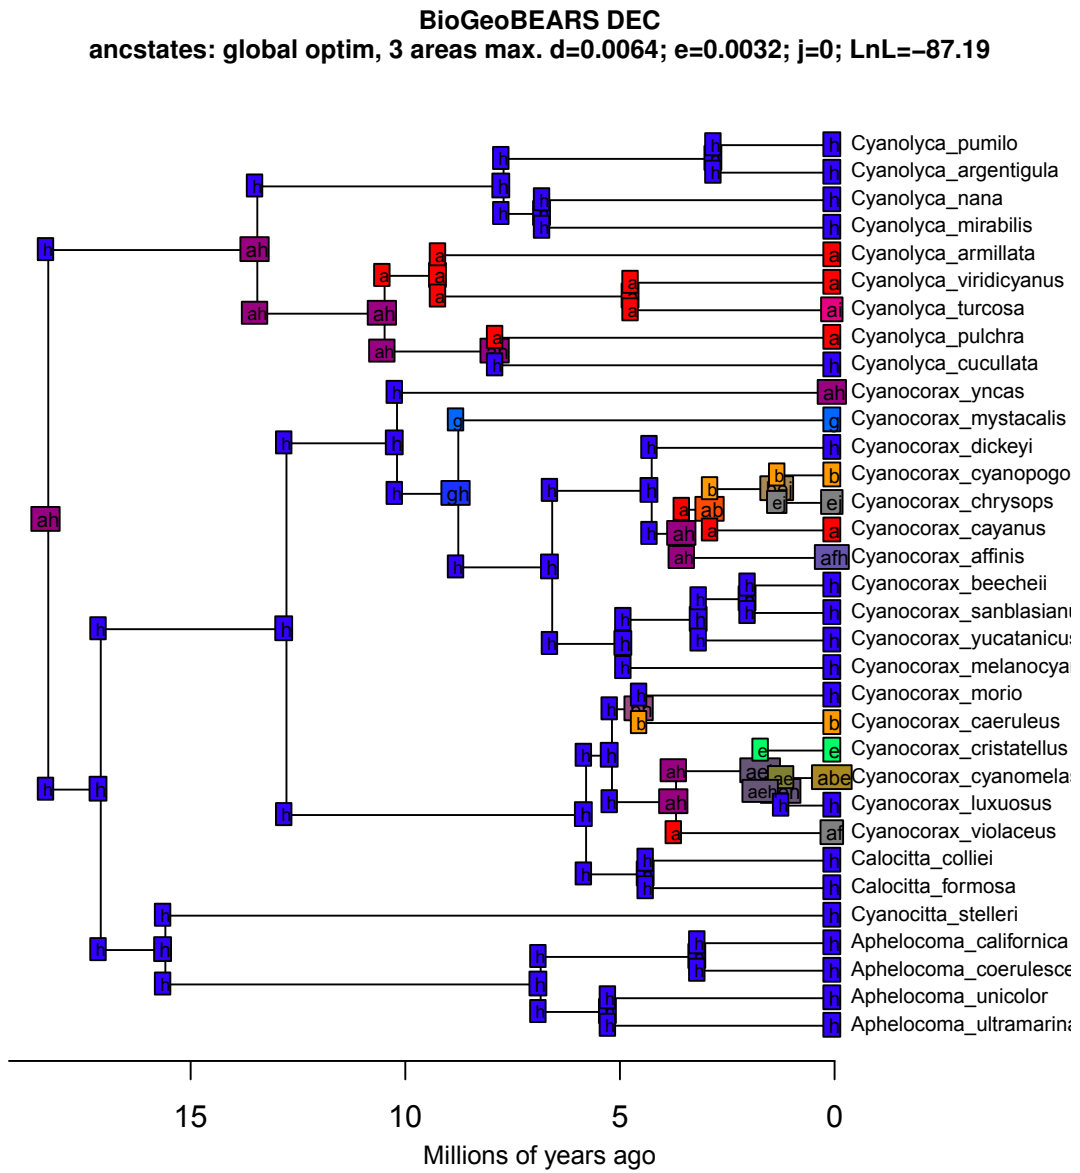



Figure S5: Clades of birds

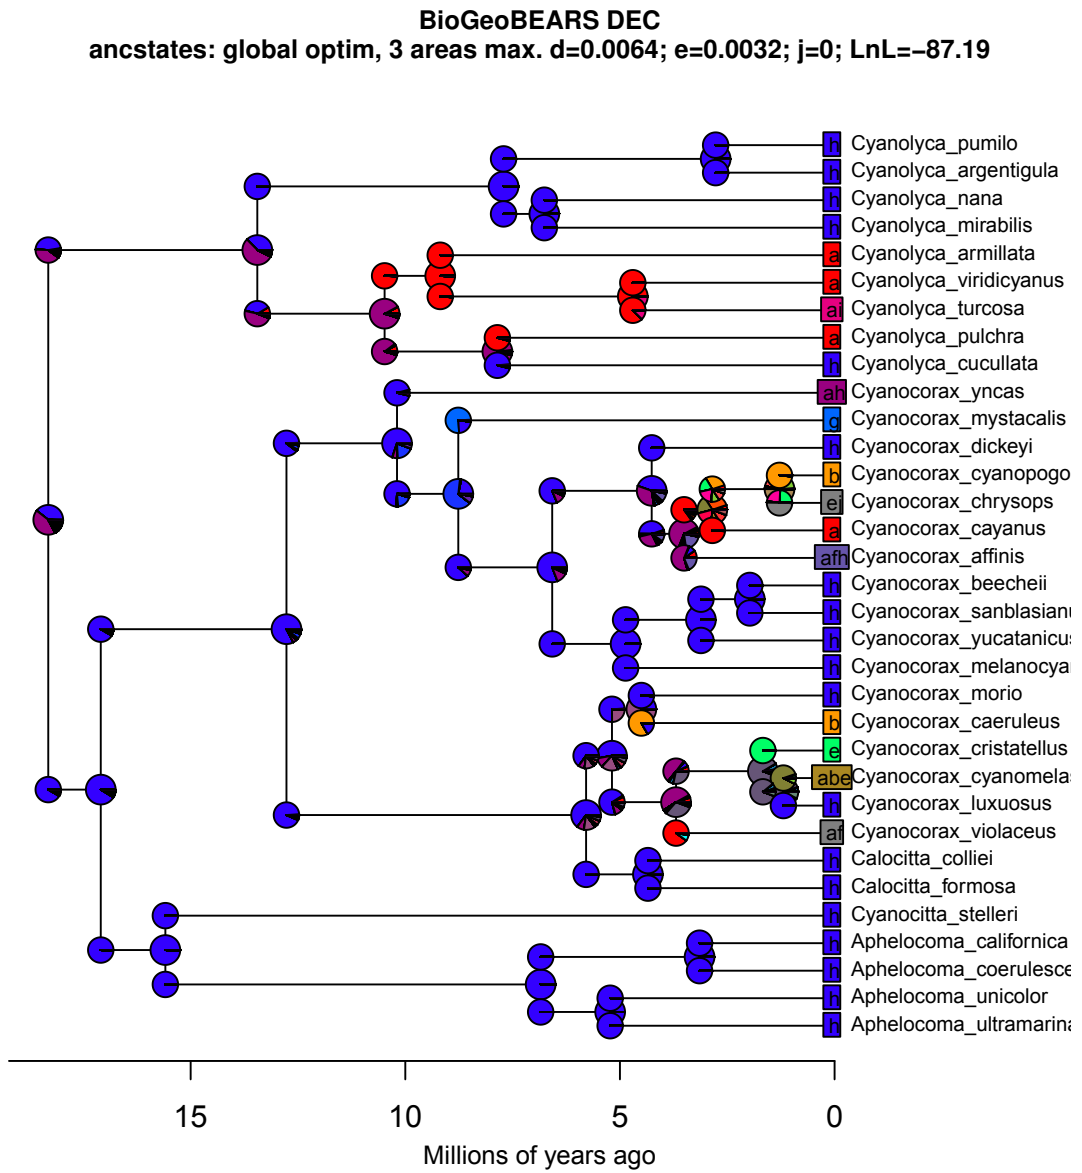

Figure S5: Clades of birds

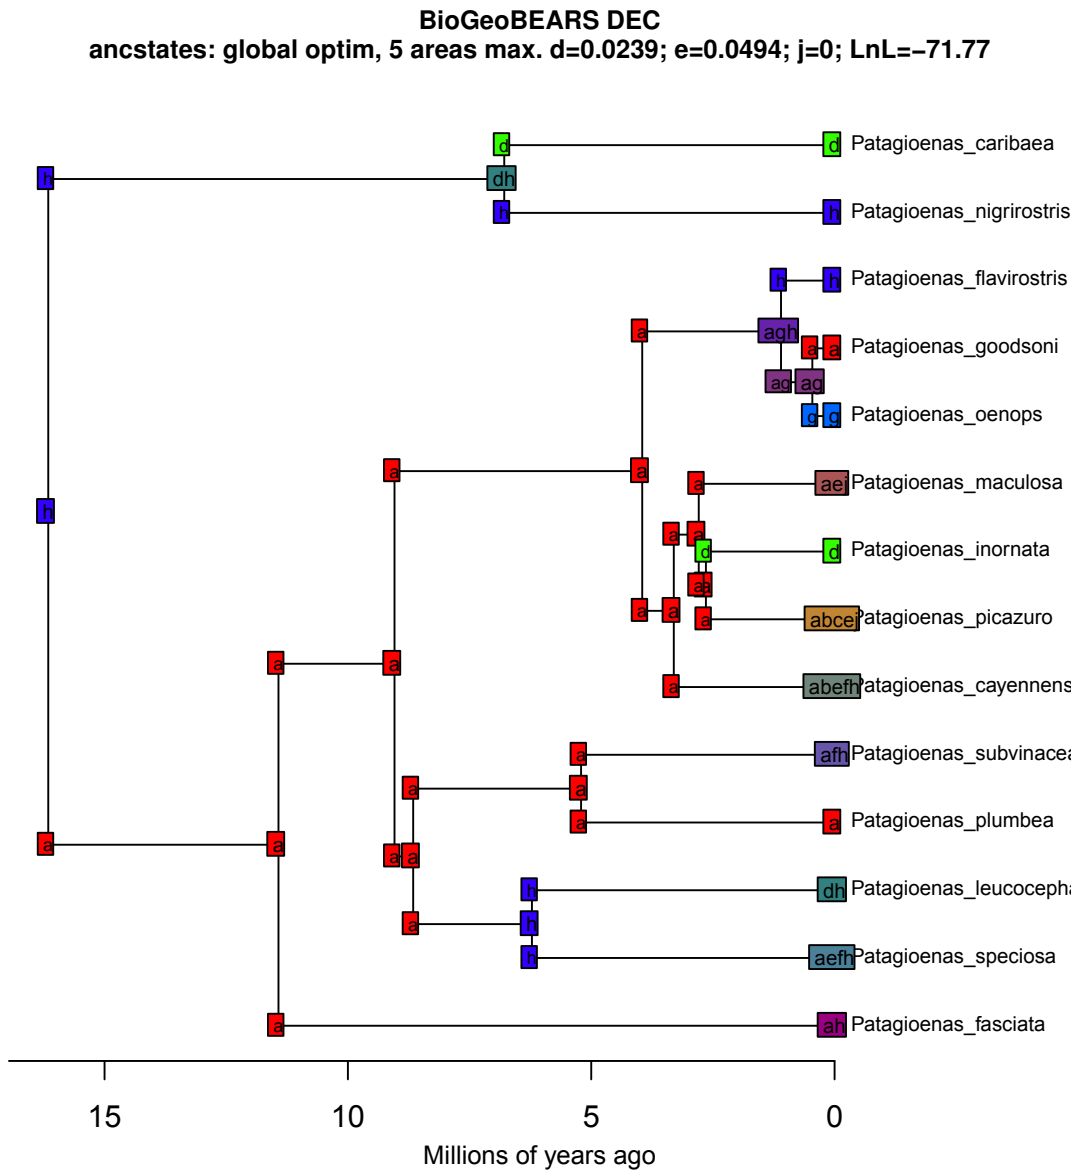

Figure S5: Clades of birds

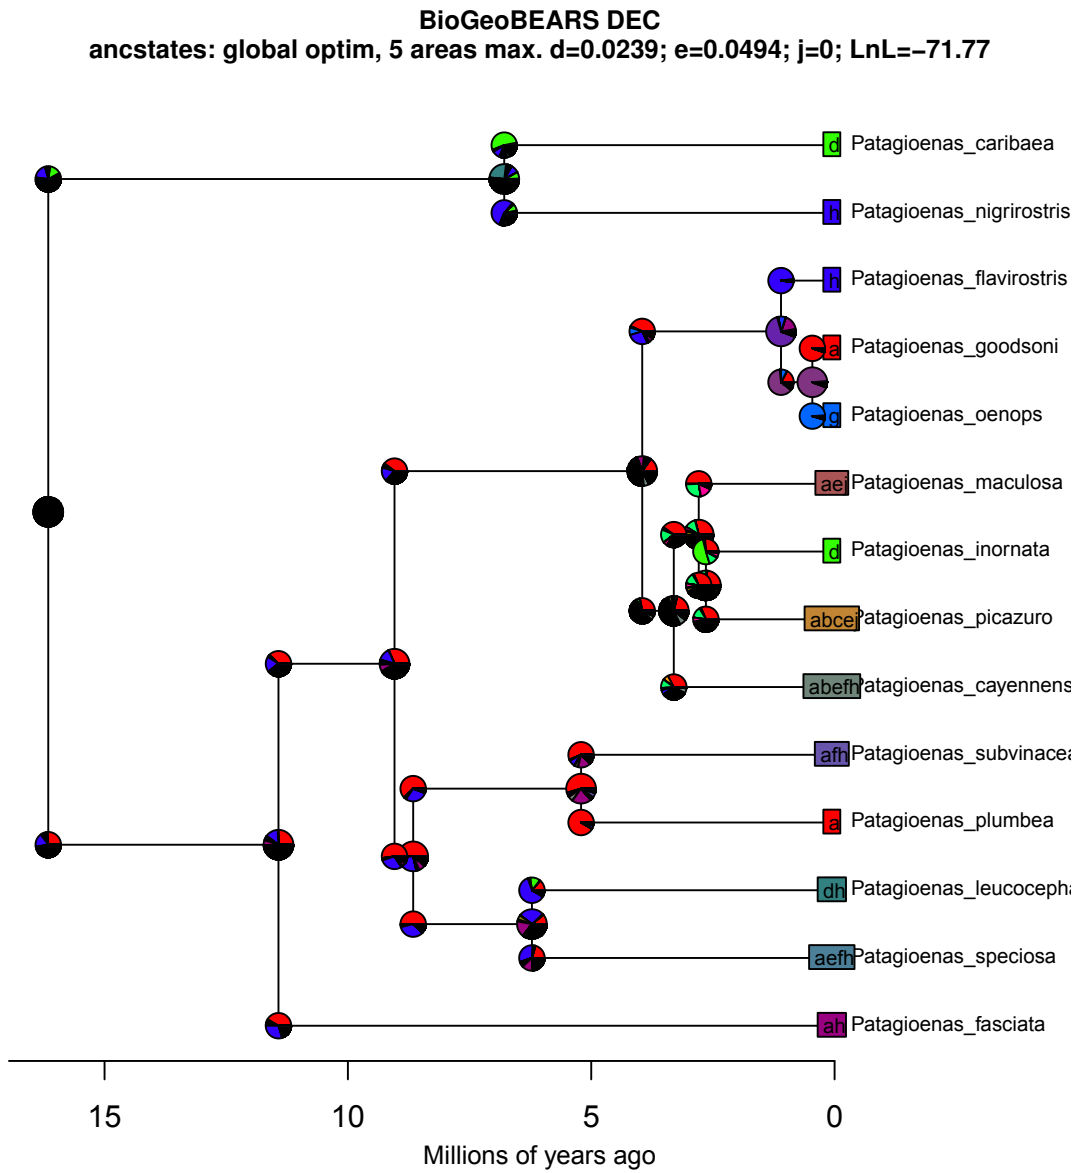

Figure S5: Clades of birds

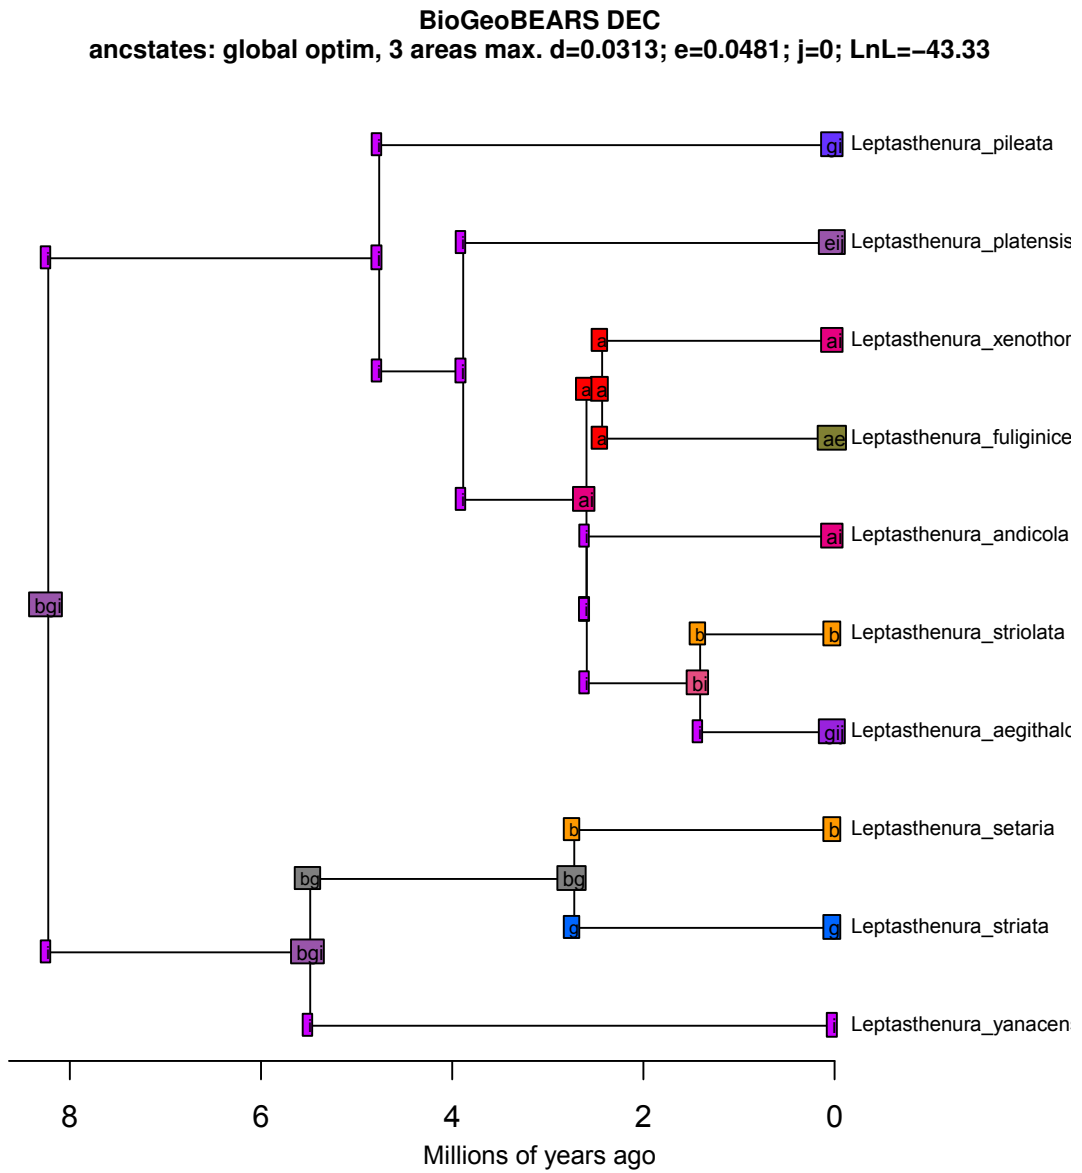

Figure S5: Clades of birds

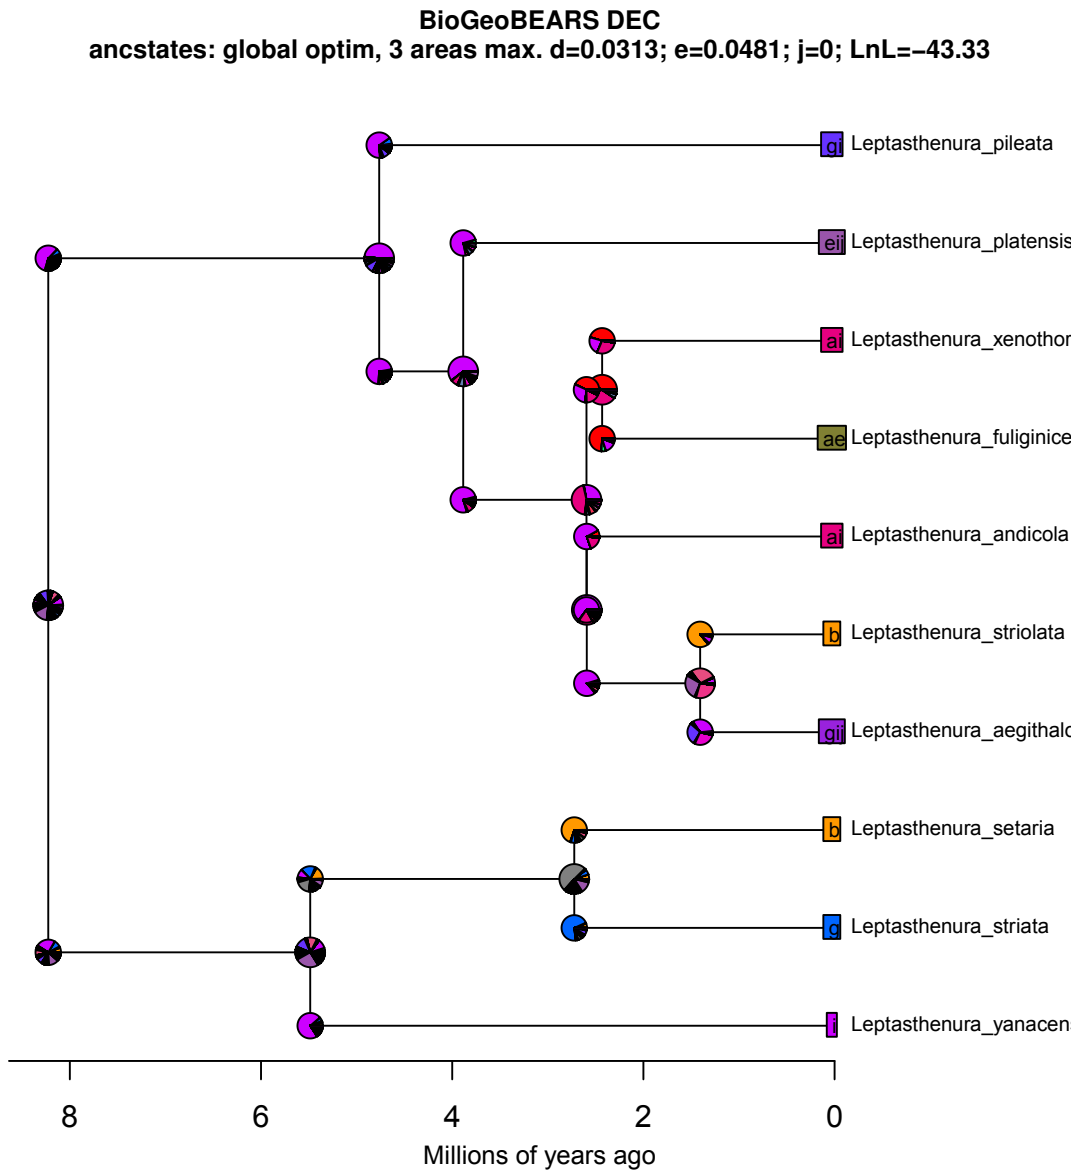

Figure S5: Clades of birds

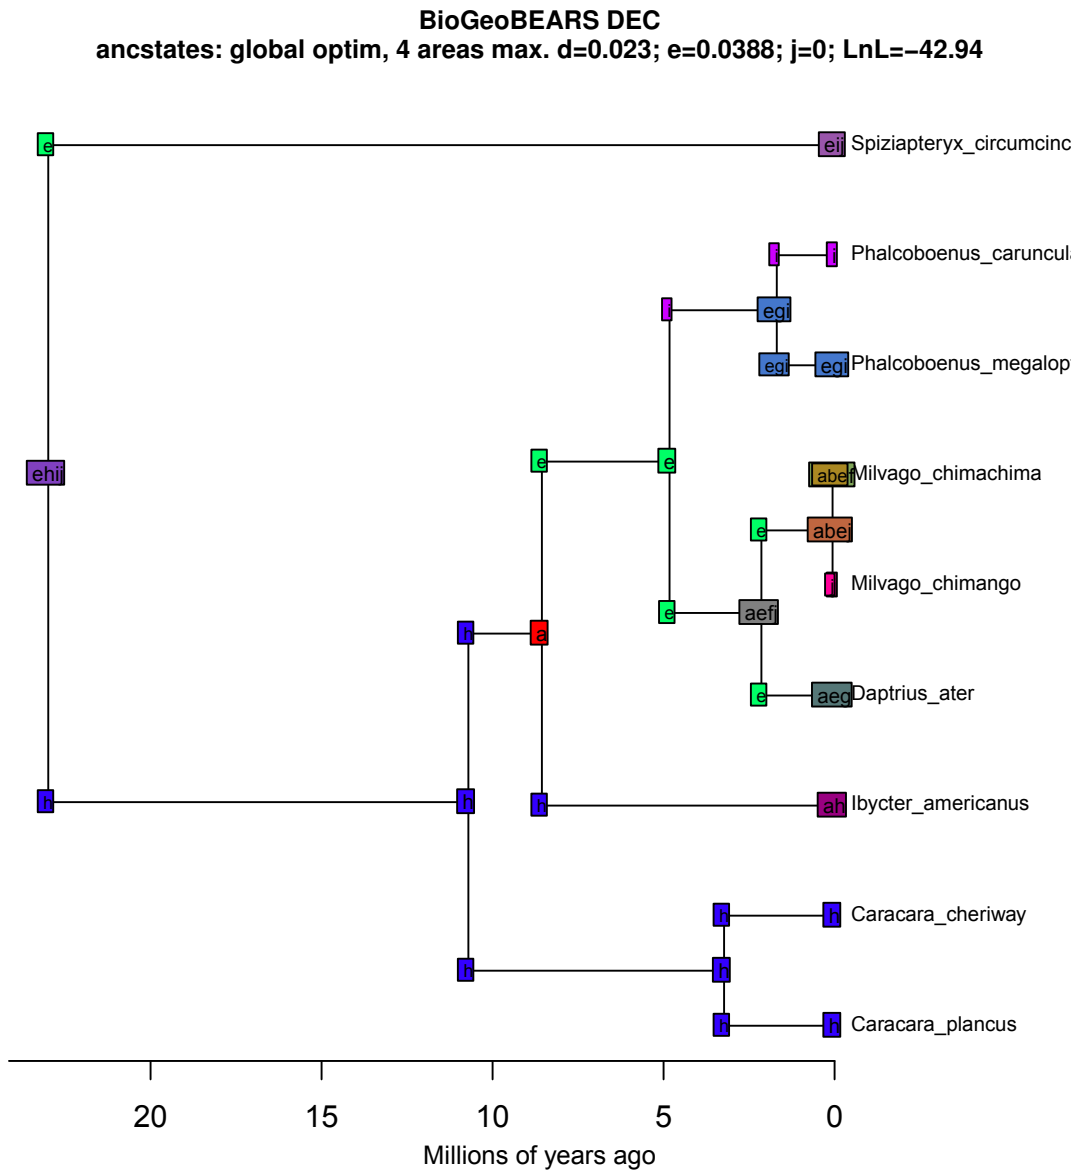

Figure S5: Clades of birds

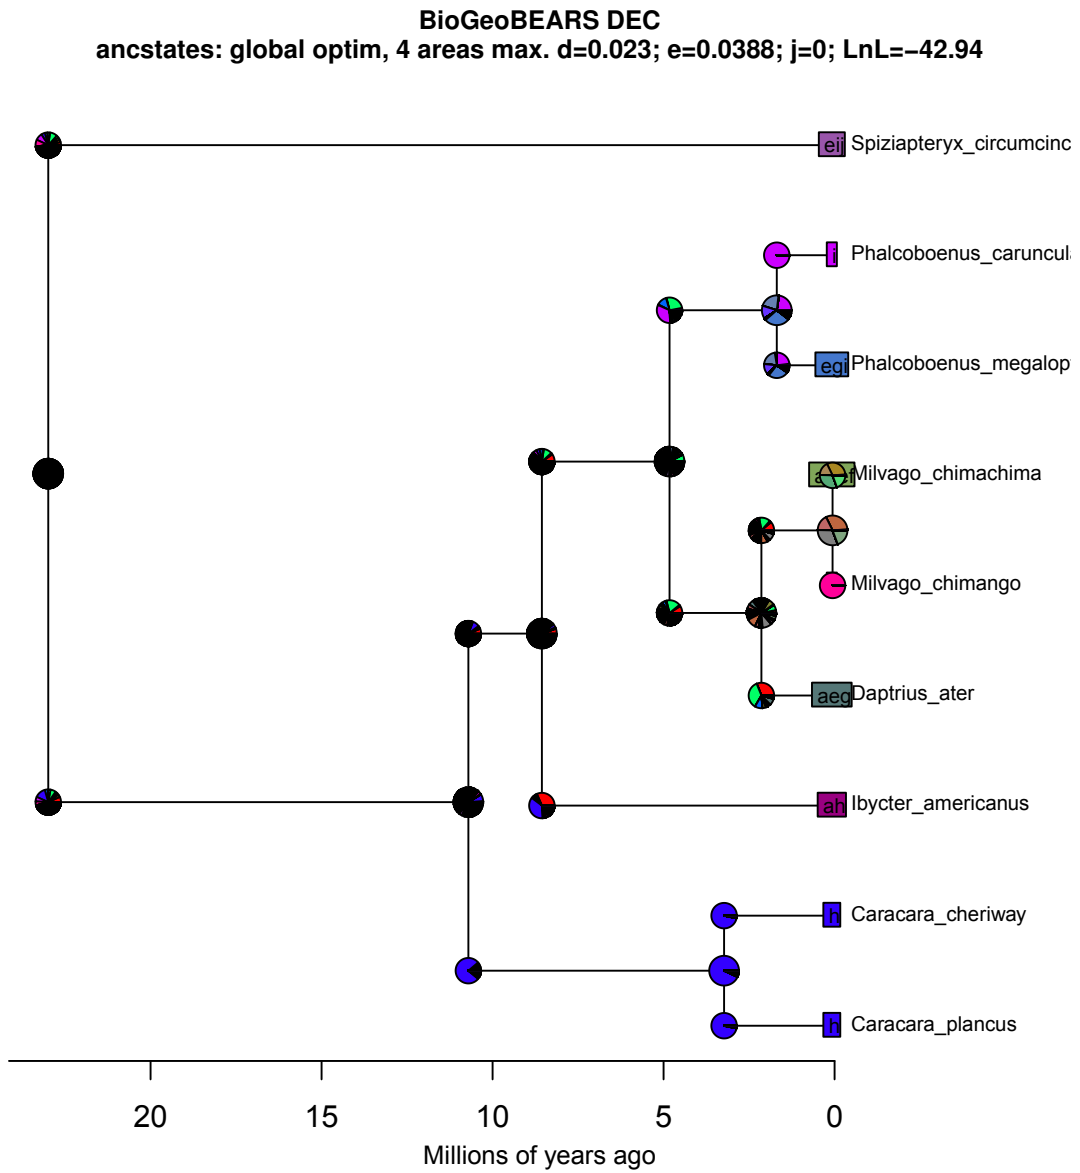

Figure S5: Clades of birds

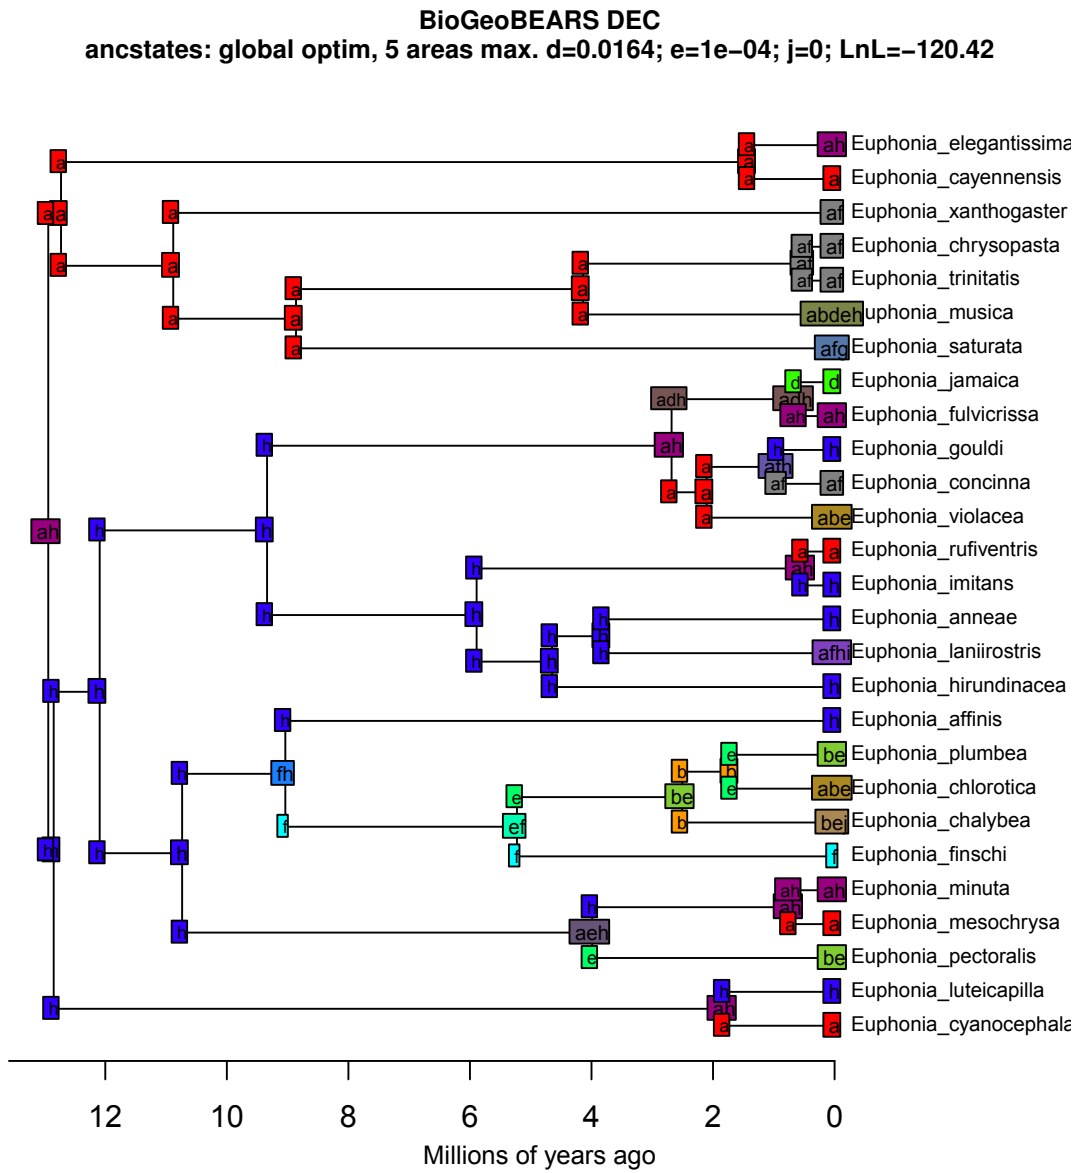



Figure S5: Clades of birds

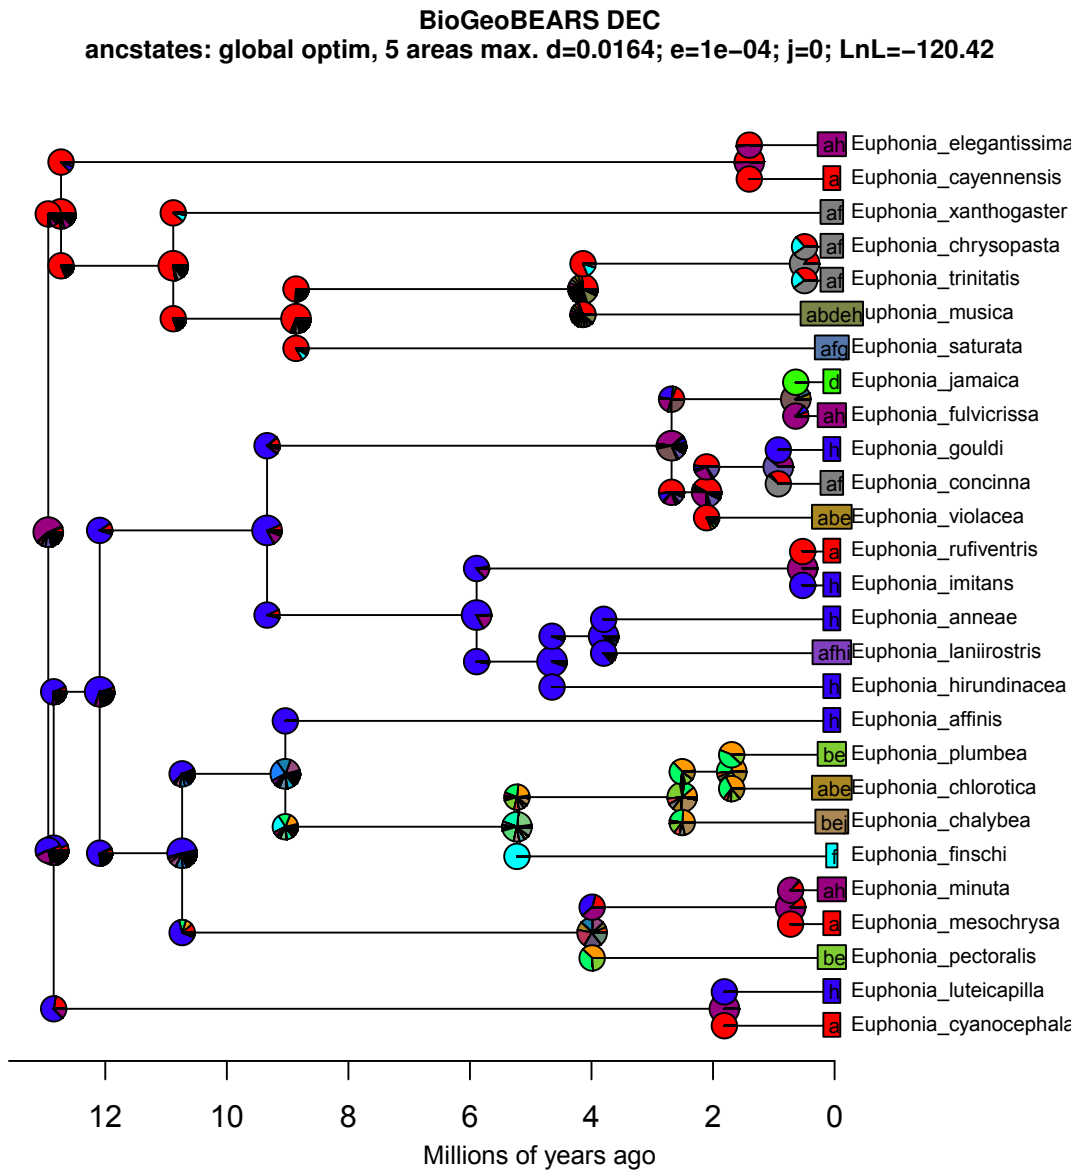

Figure S5: Clades of birds

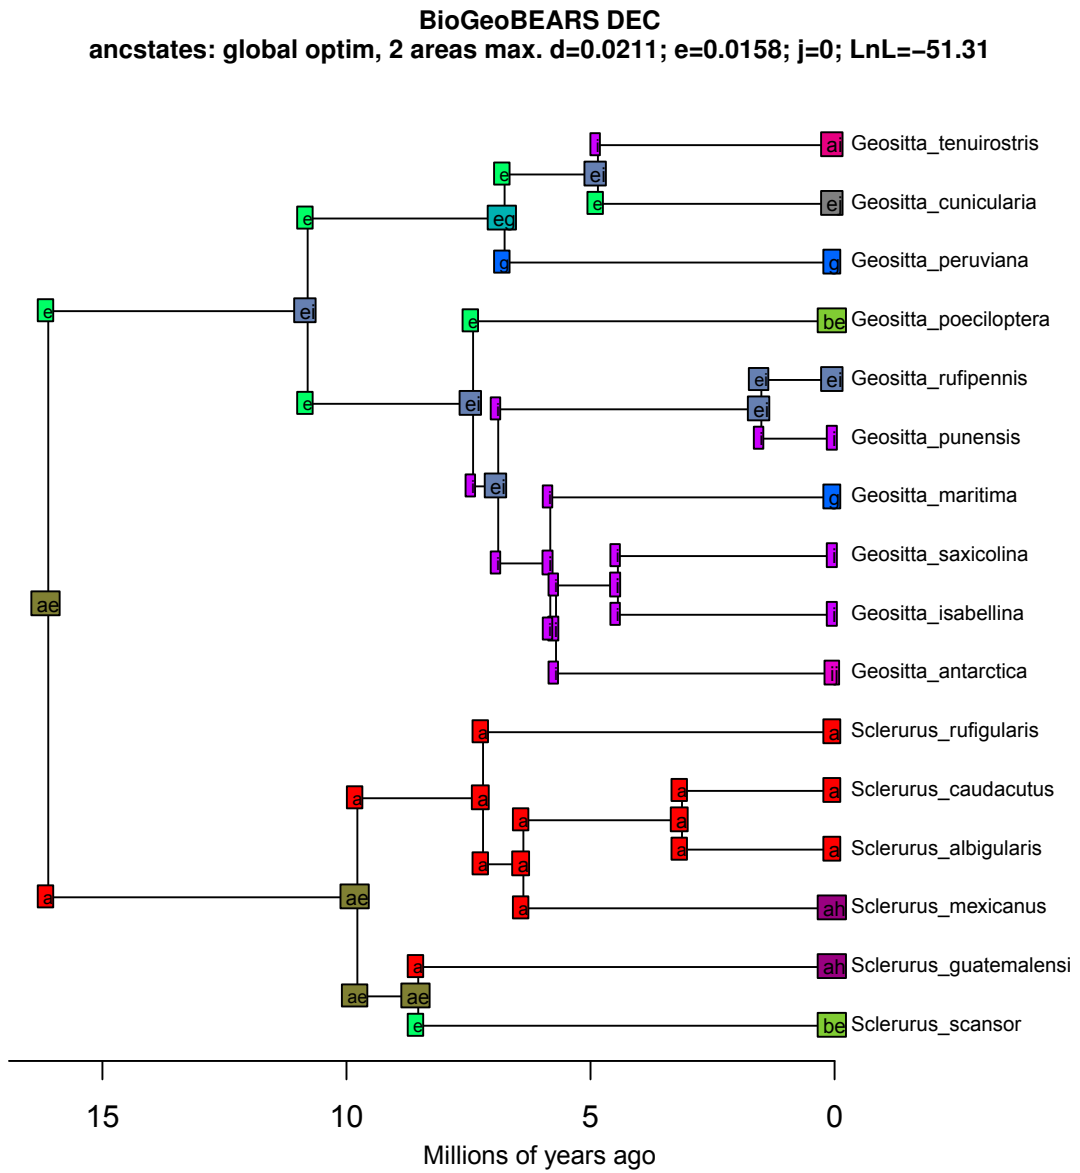

Figure S5: Clades of birds

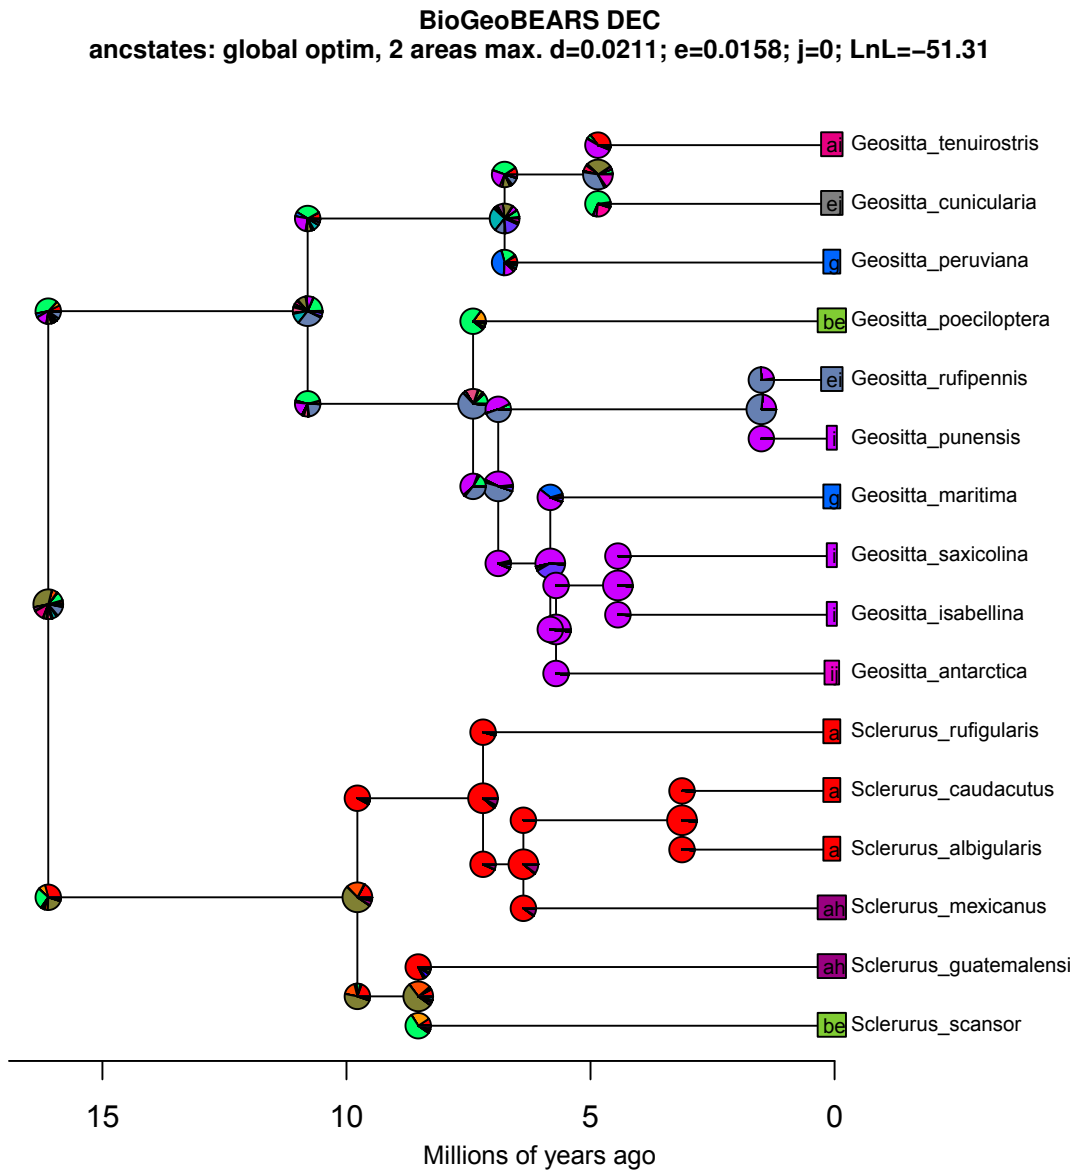

Figure S5: Clades of birds

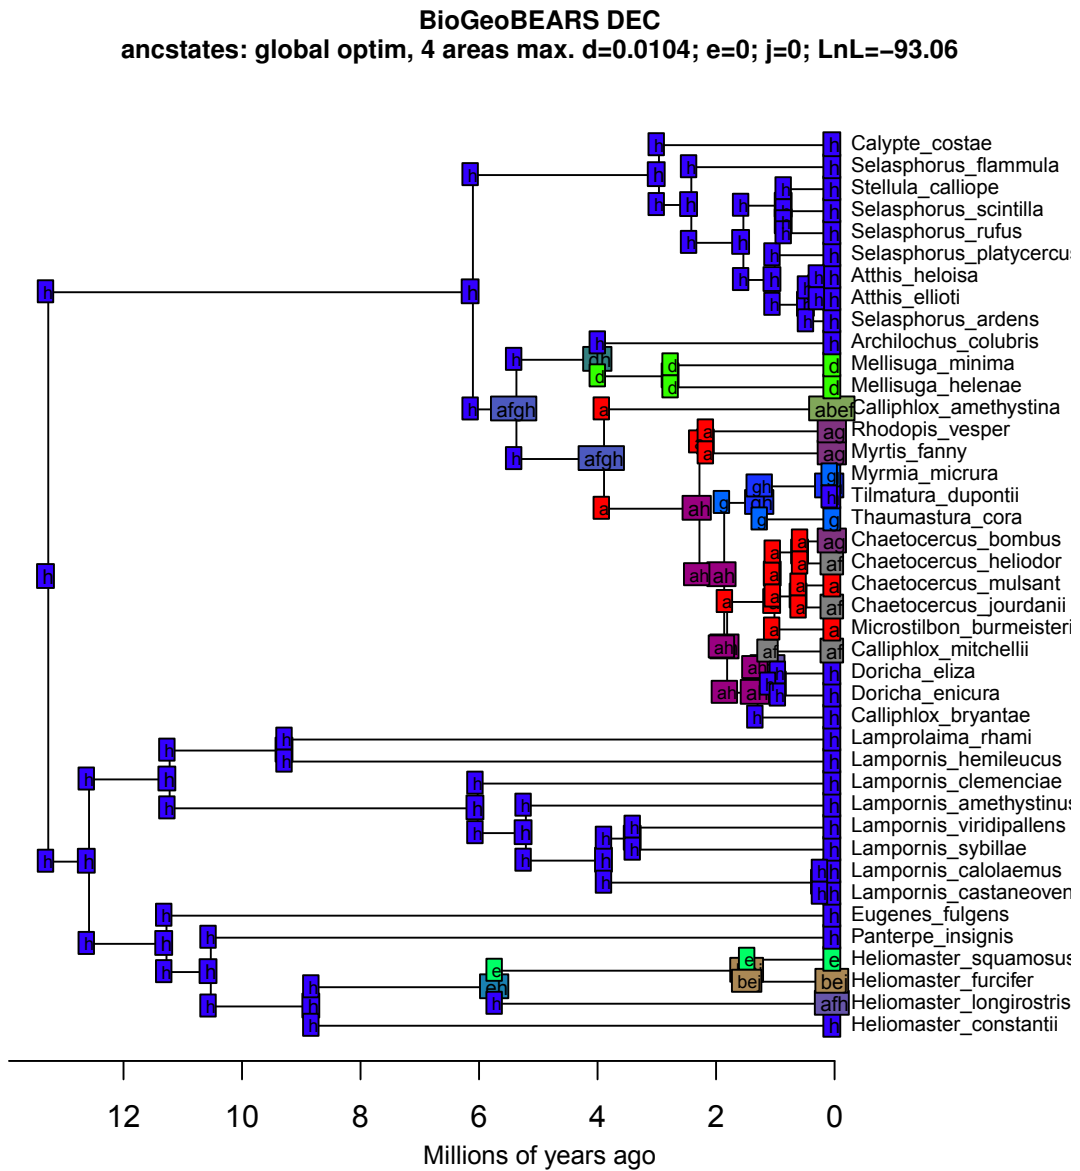

Figure S5: Clades of birds

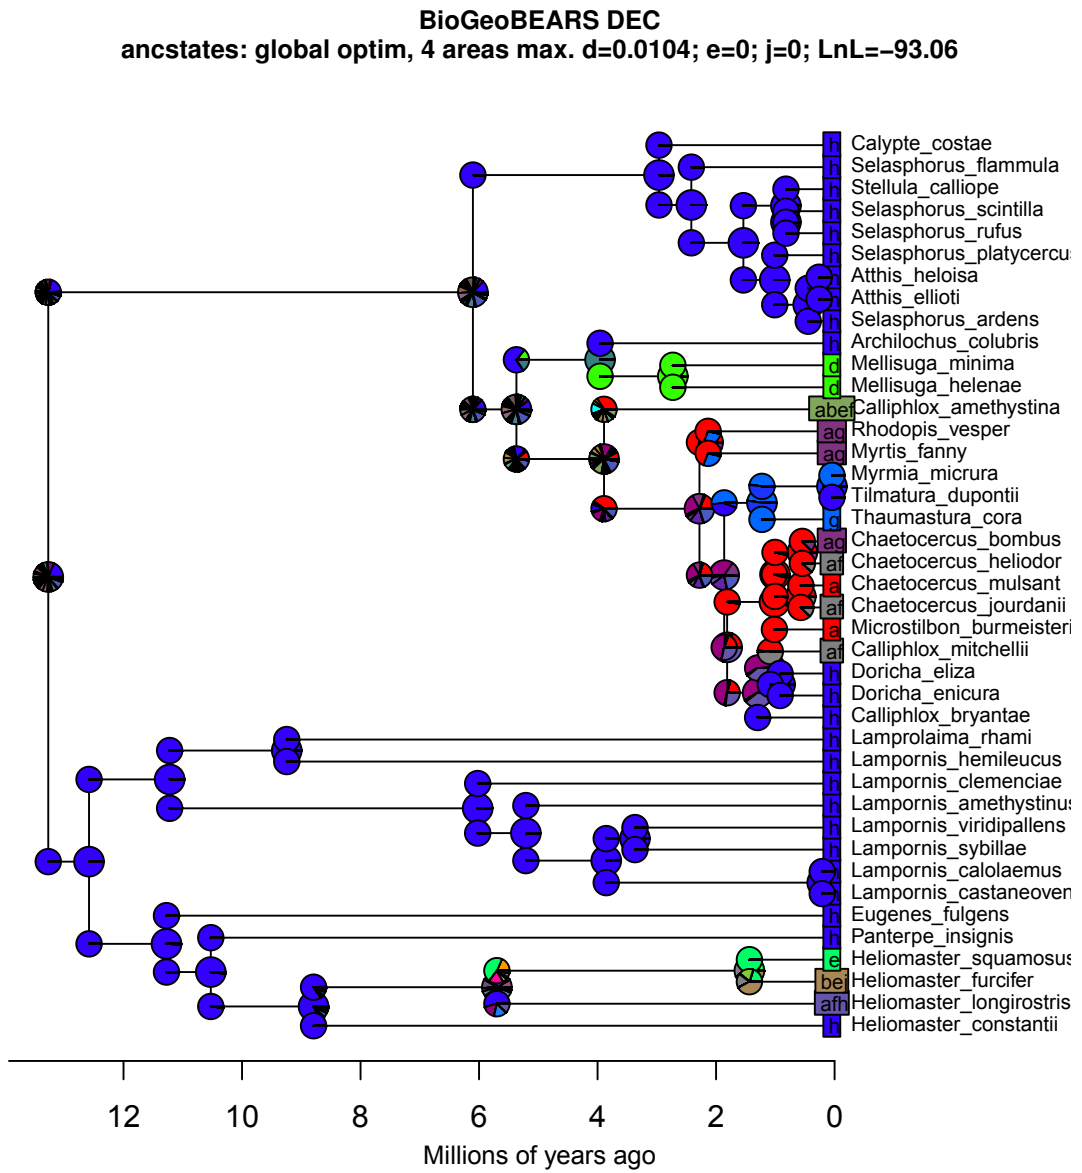

Figure S5: Clades of birds

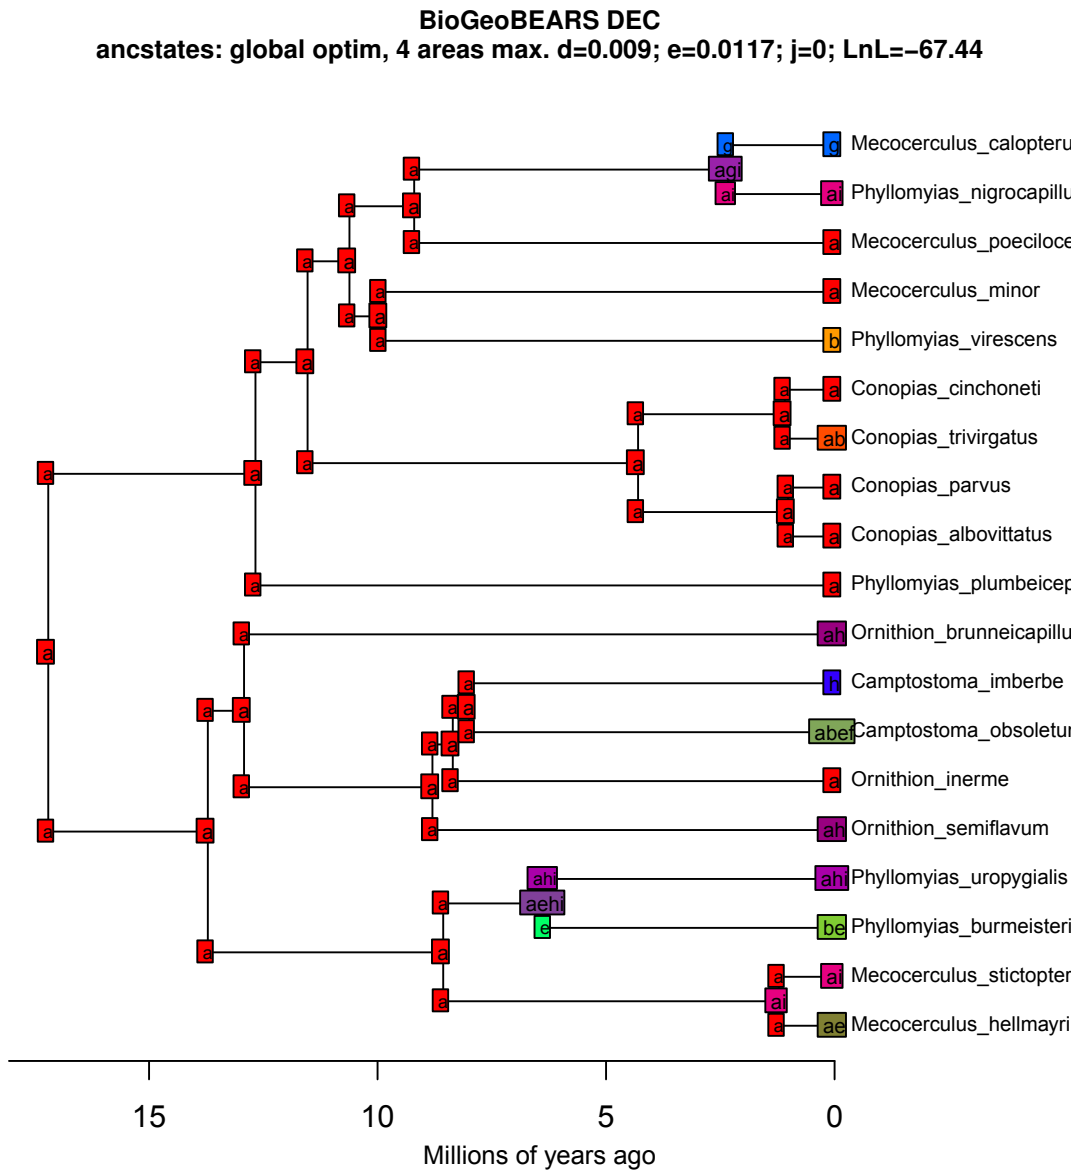

Figure S5: Clades of birds

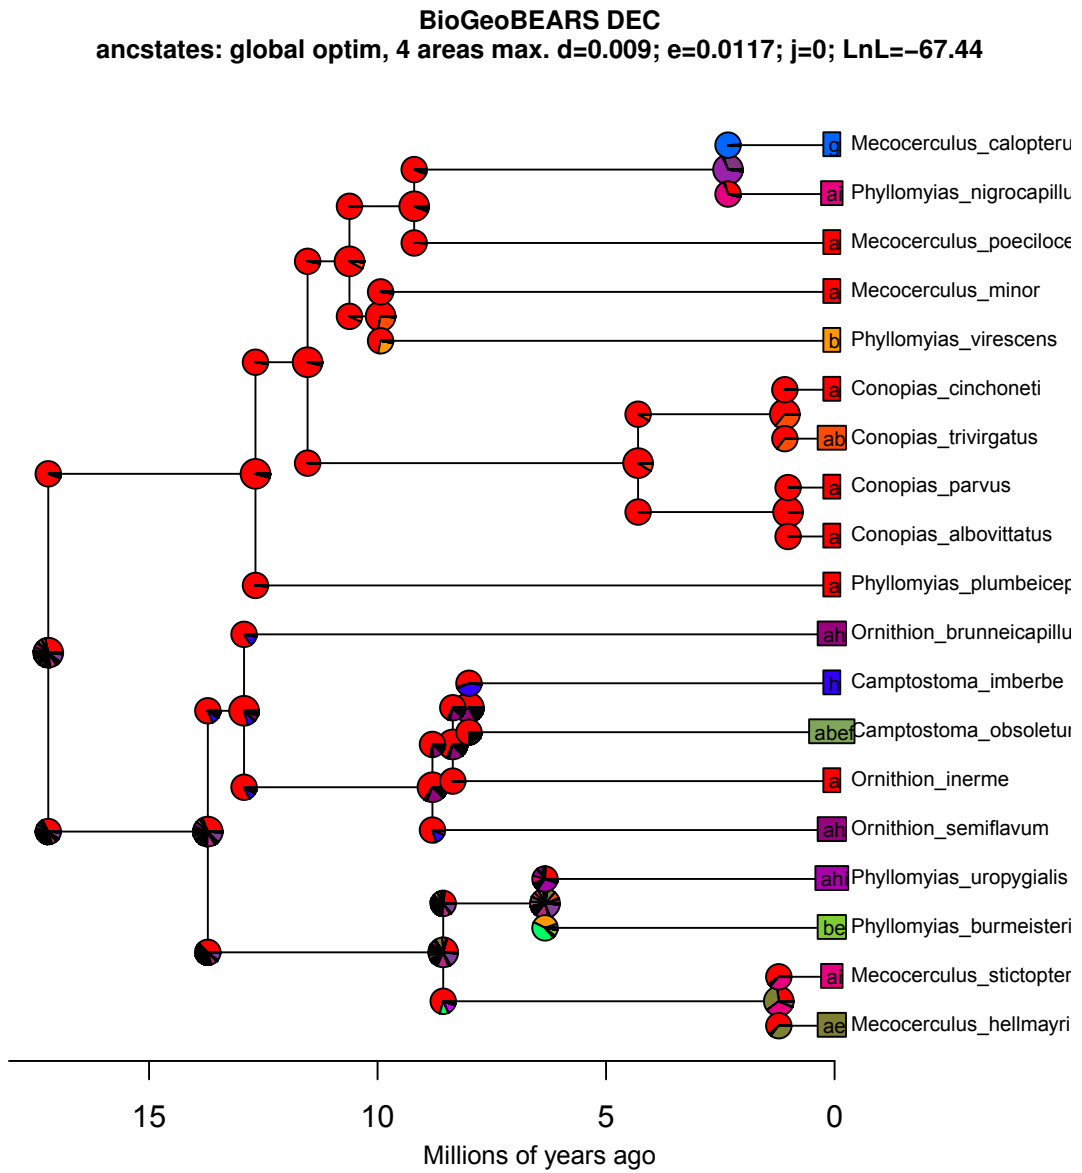

Figure S5: Clades of birds

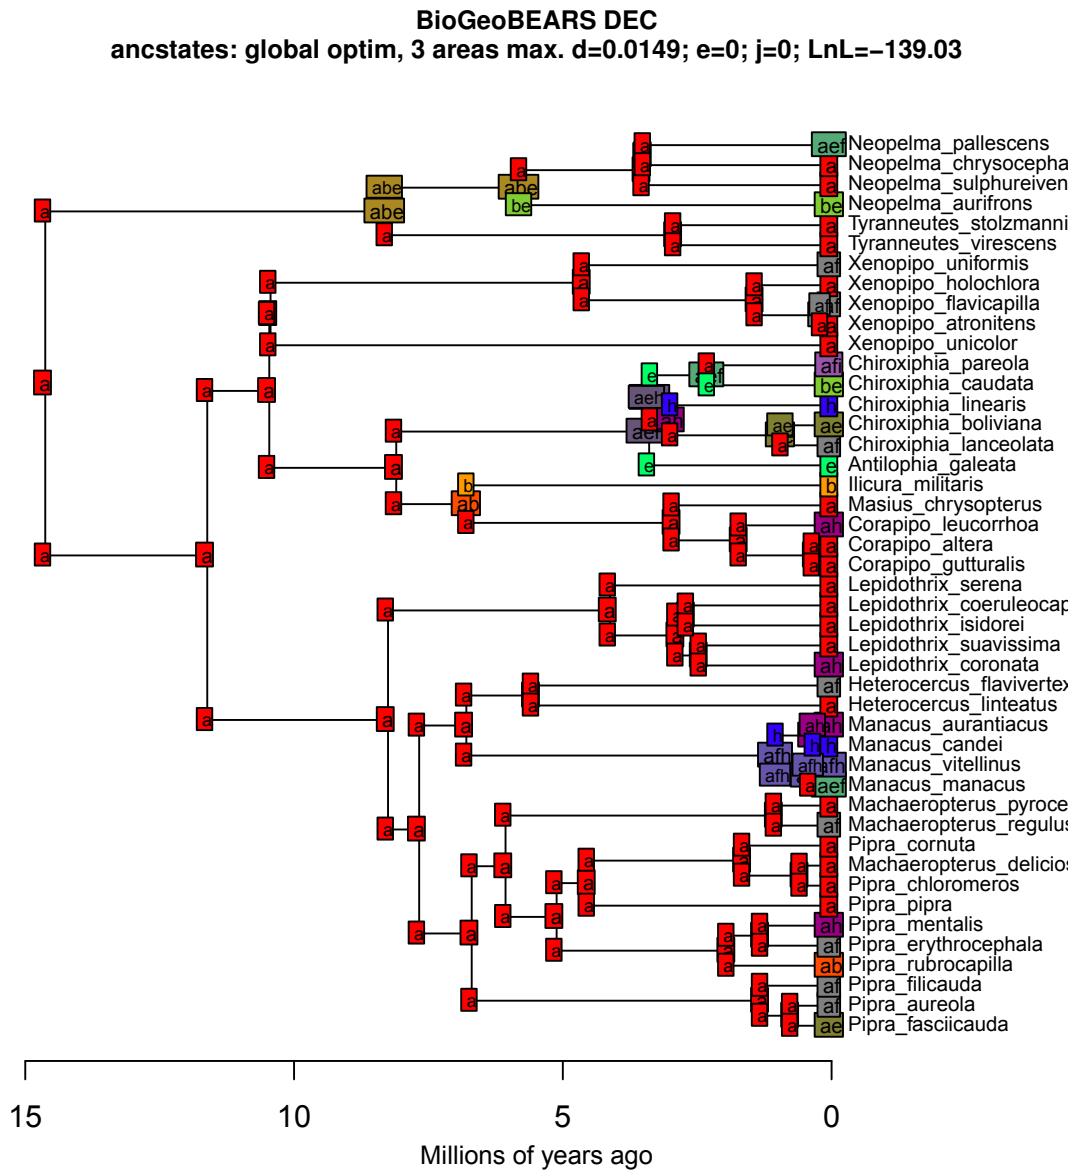



Figure S5: Clades of birds

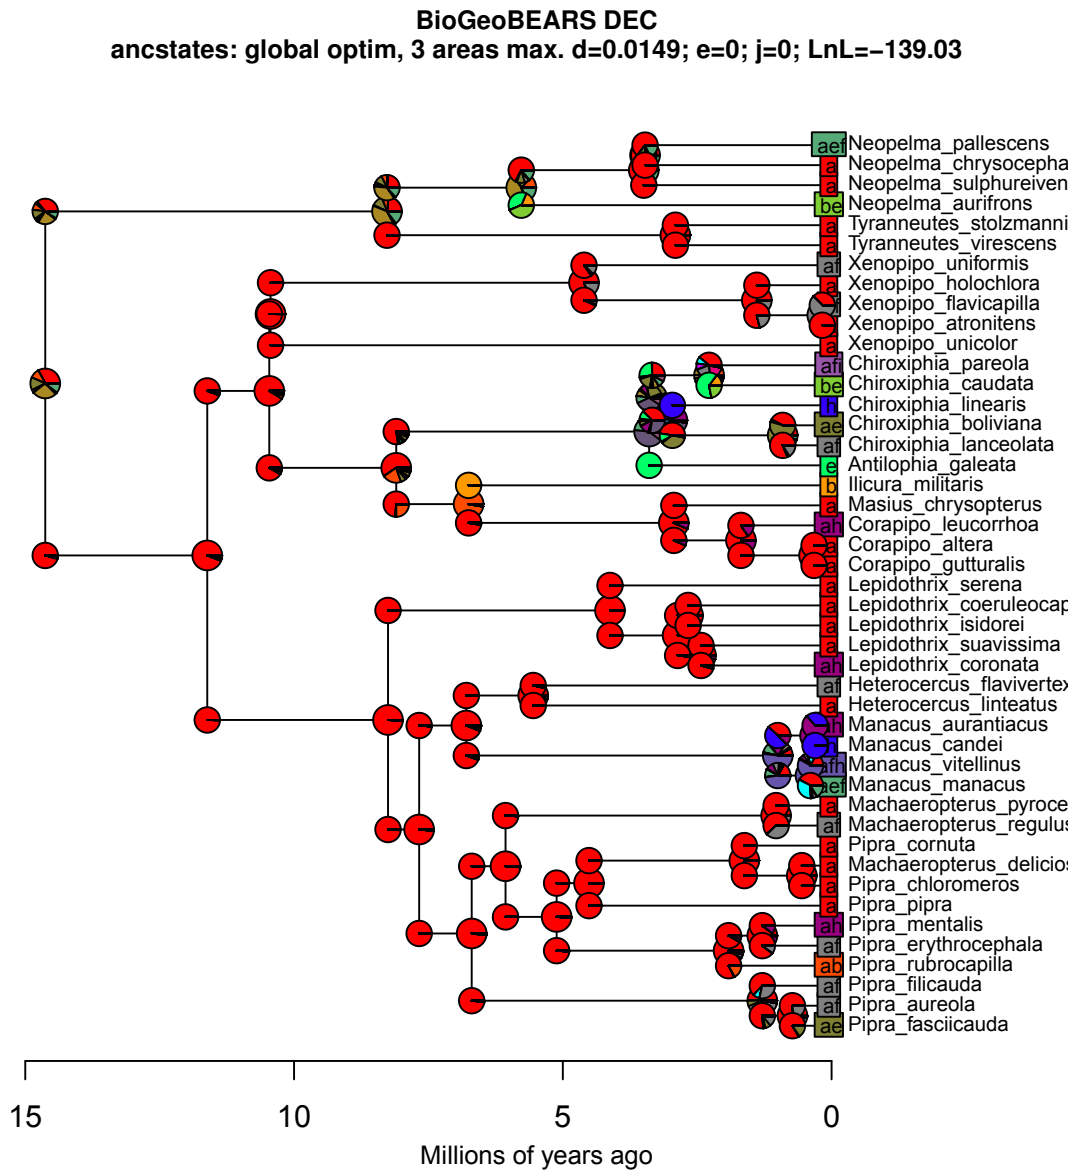

Figure S5: Clades of birds

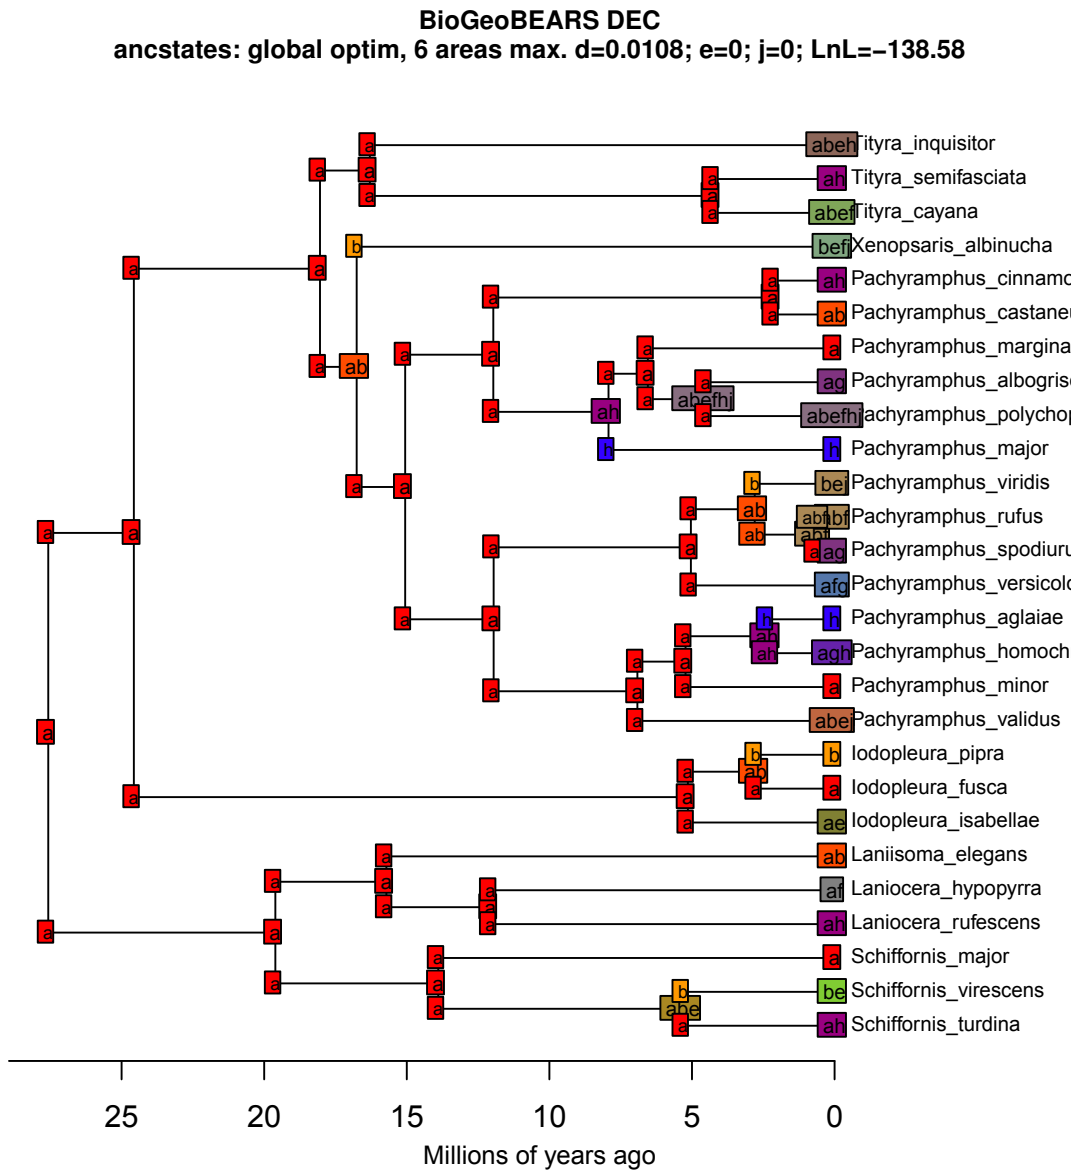

Figure S5: Clades of birds

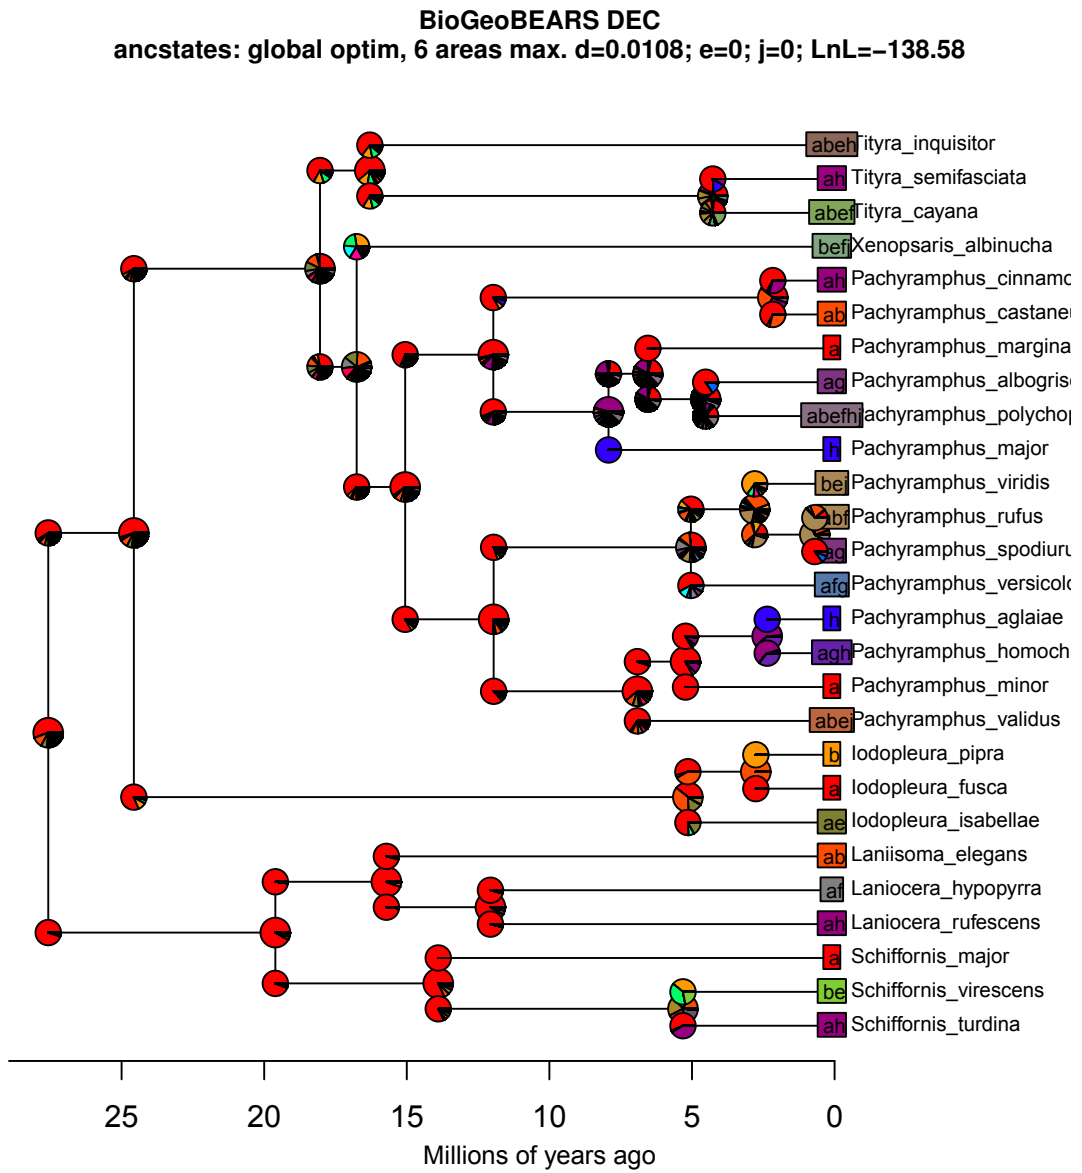

Figure S5: Clades of birds

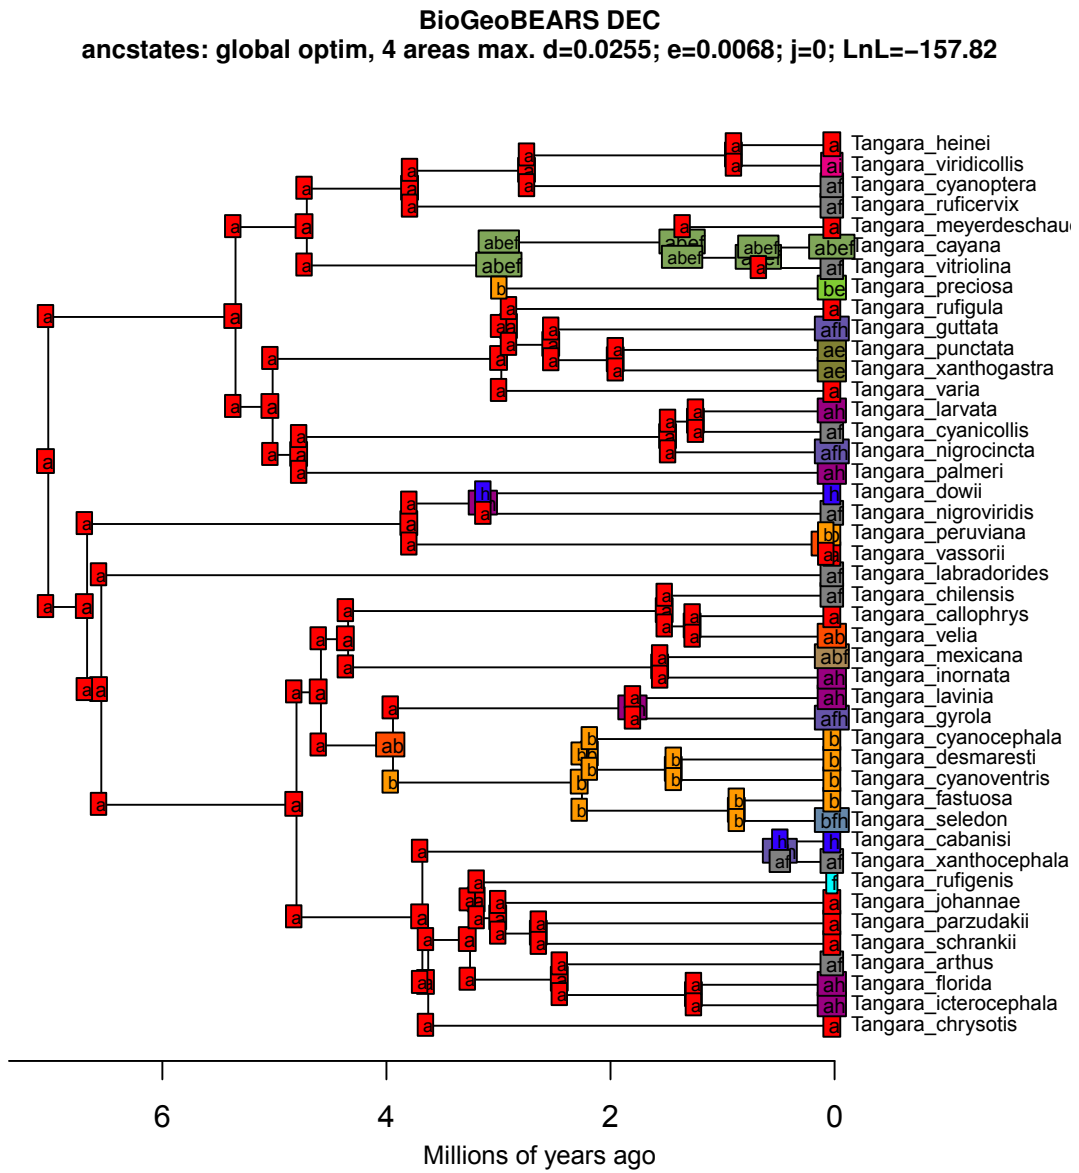

Figure S5: Clades of birds

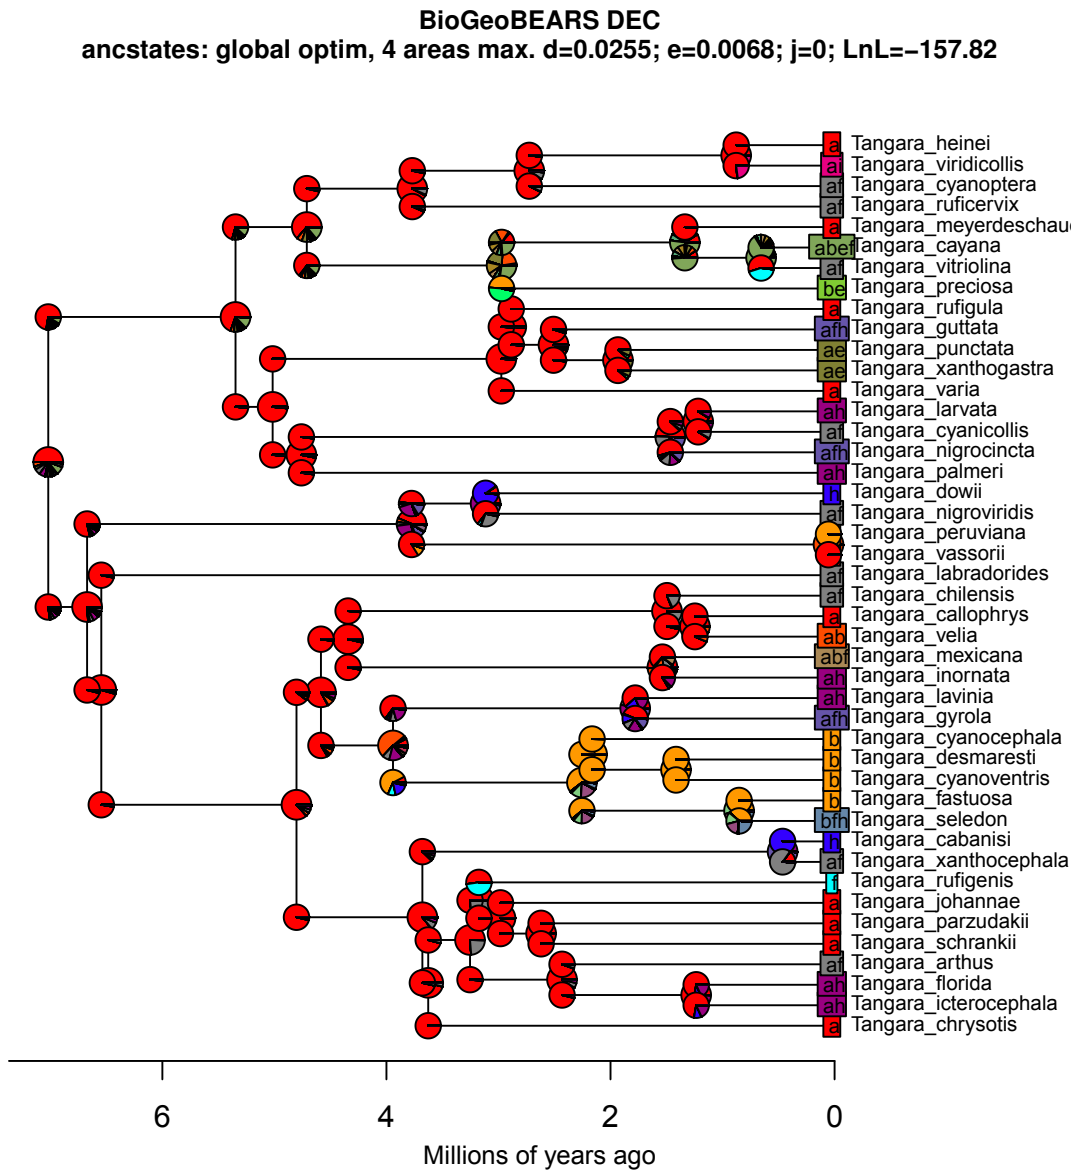

Figure S5: Clades of birds

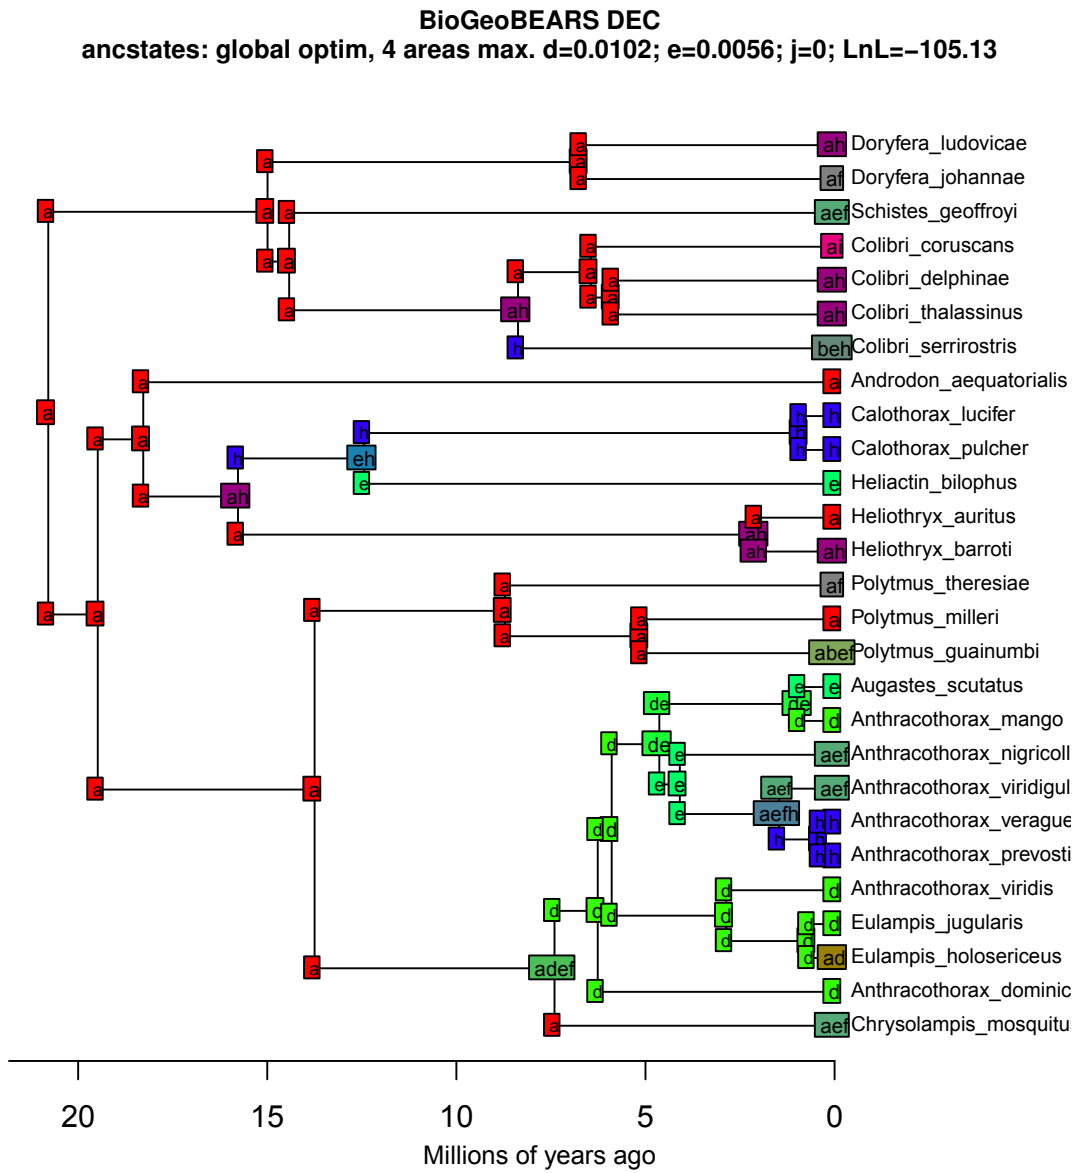

Figure S5: Clades of birds

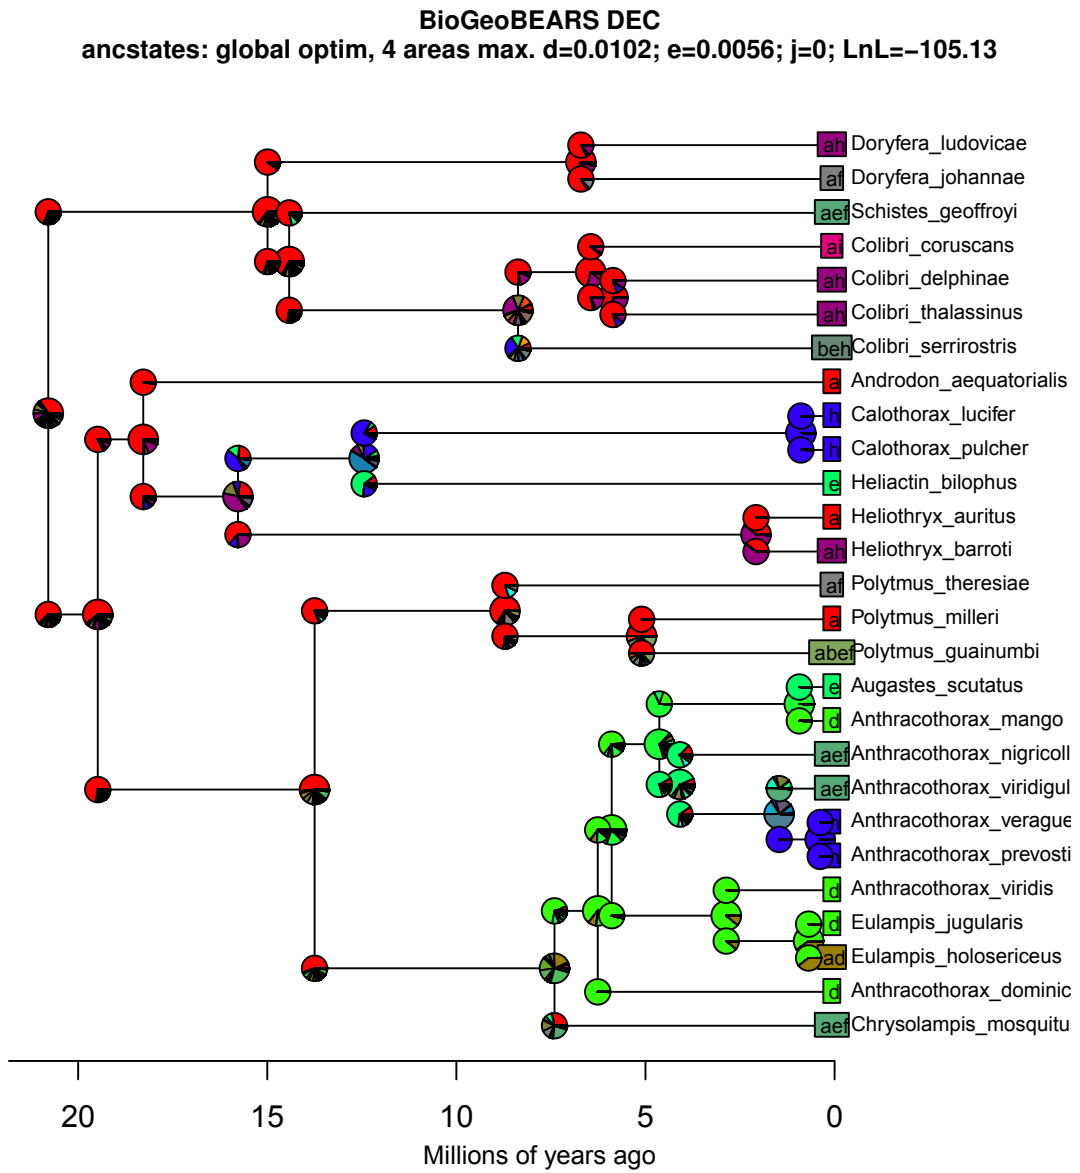

Figure S5: Clades of birds

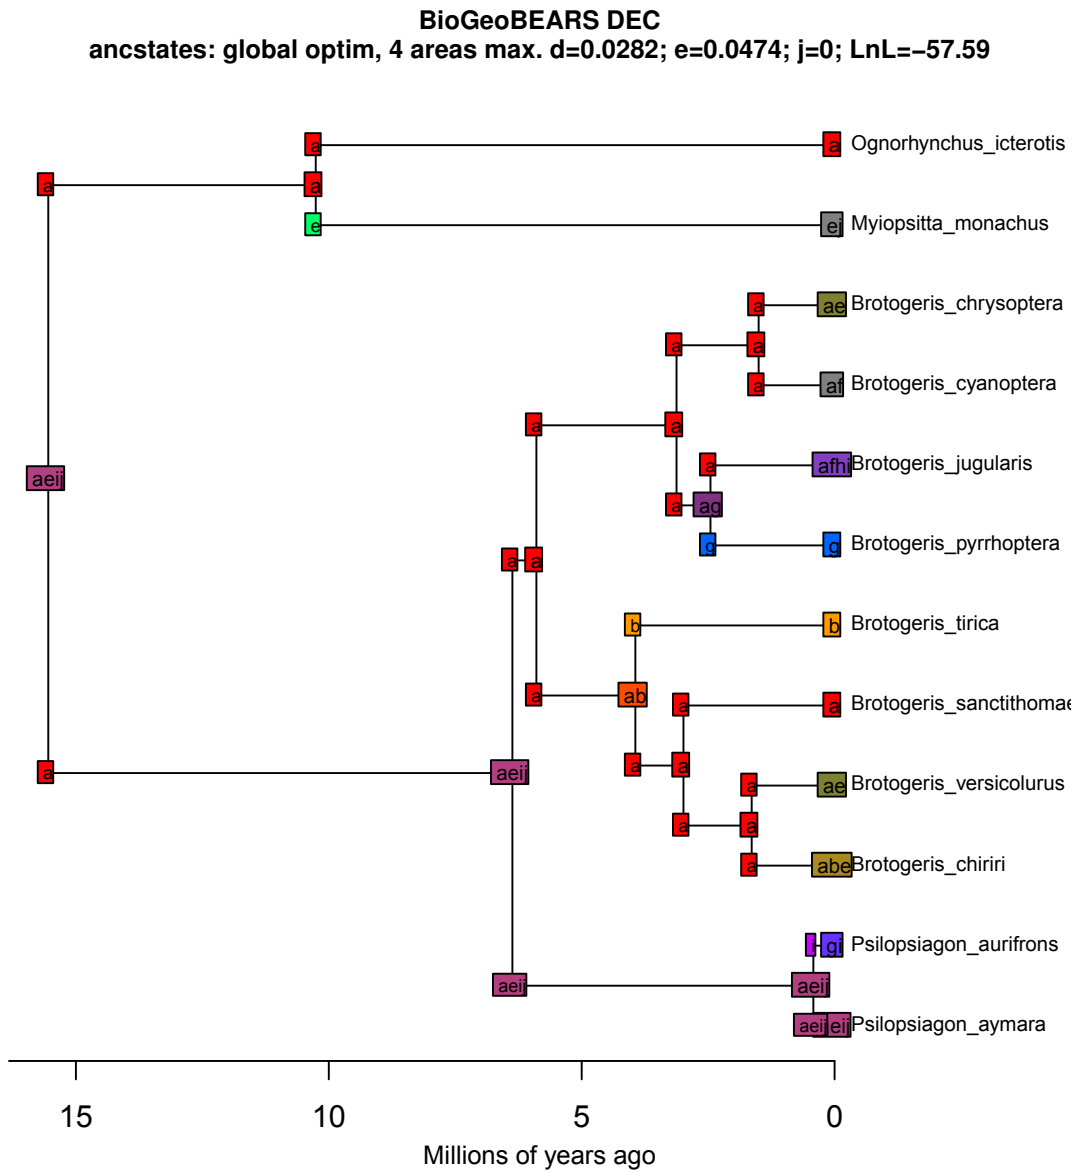



Figure S5: Clades of birds

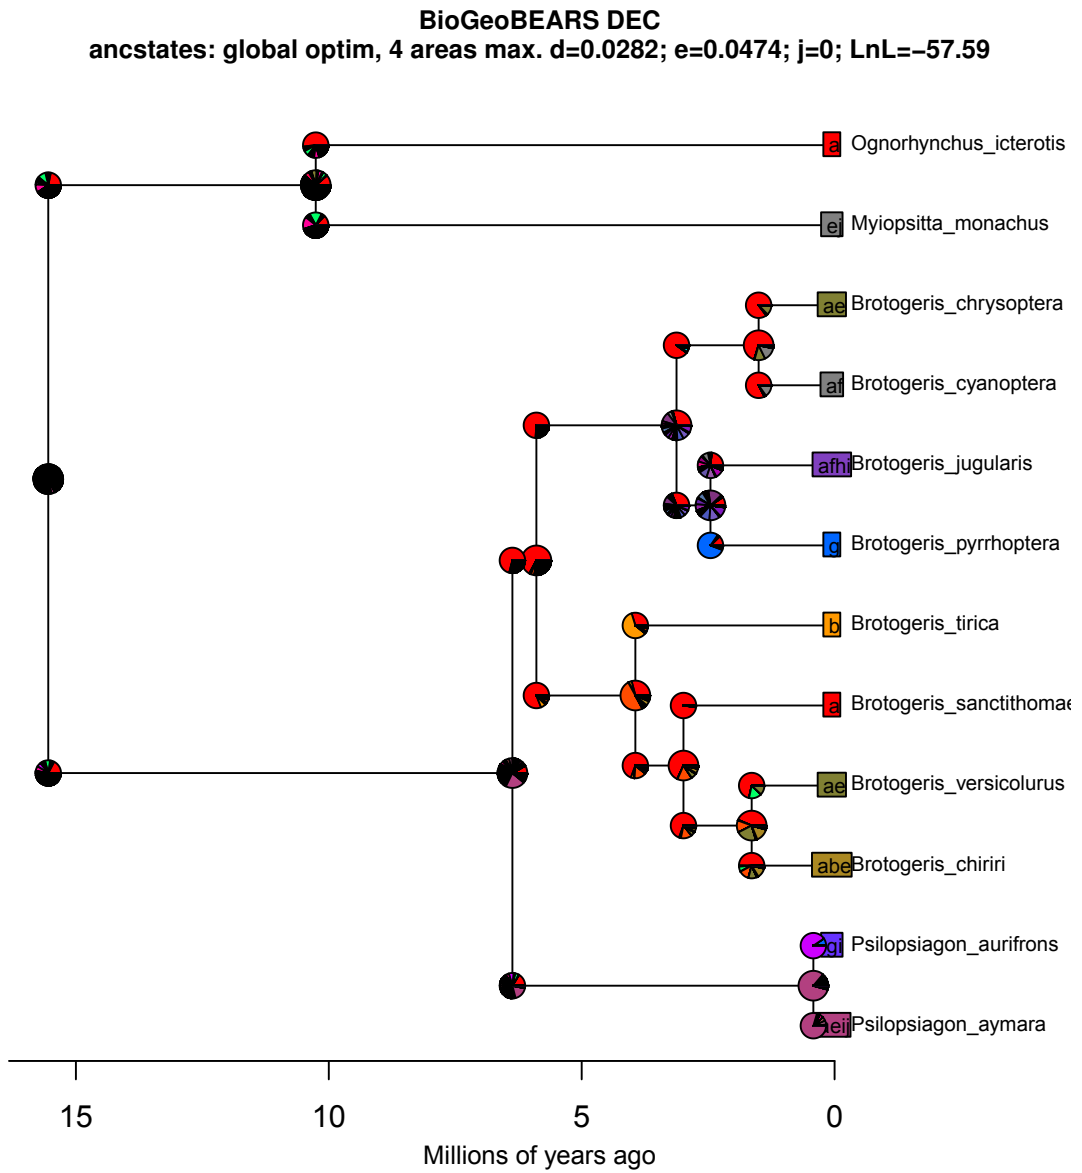

Figure S5: Clades of birds

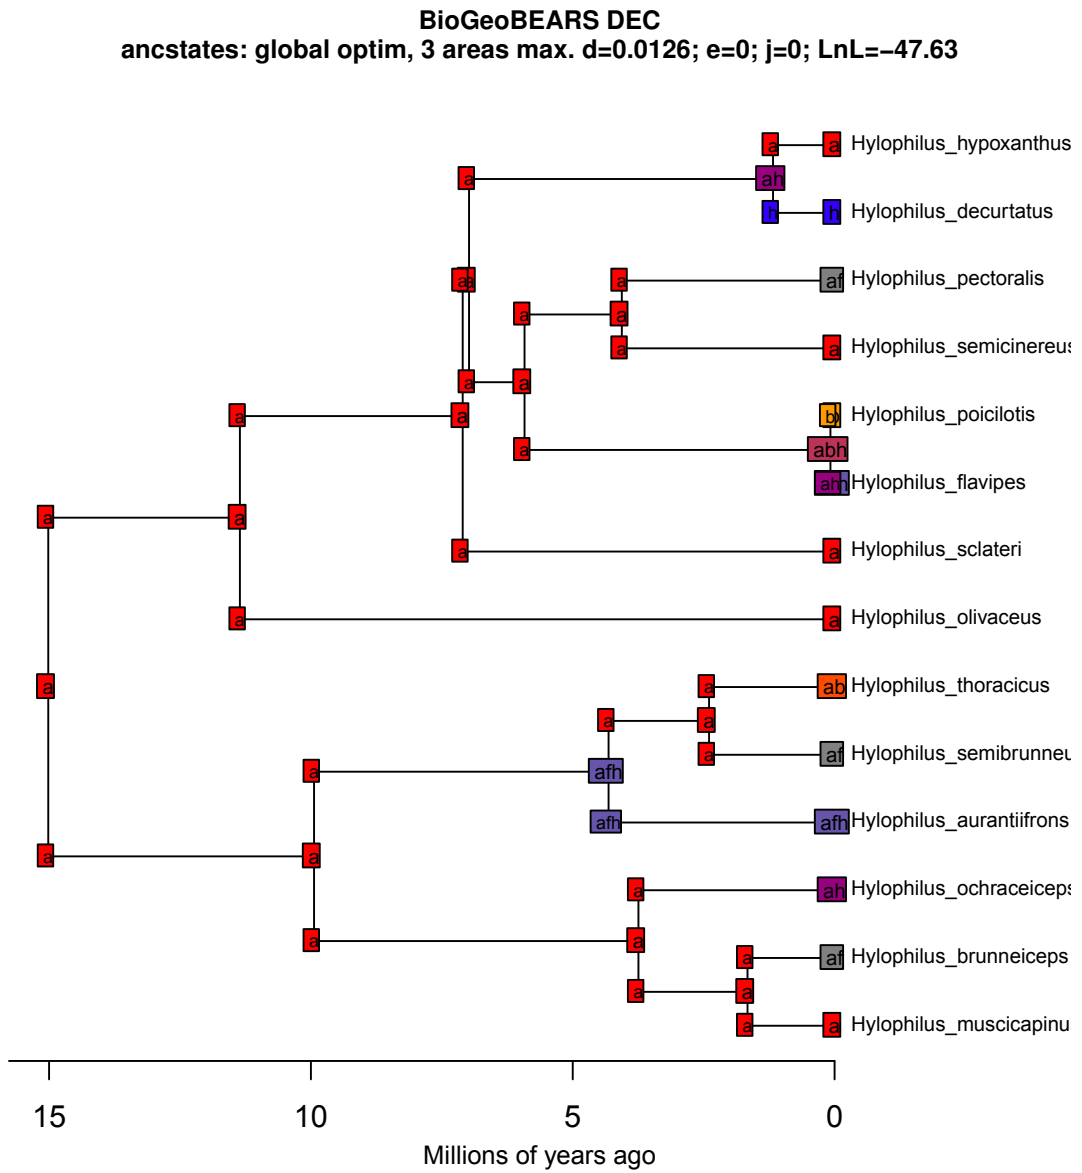

Figure S5: Clades of birds

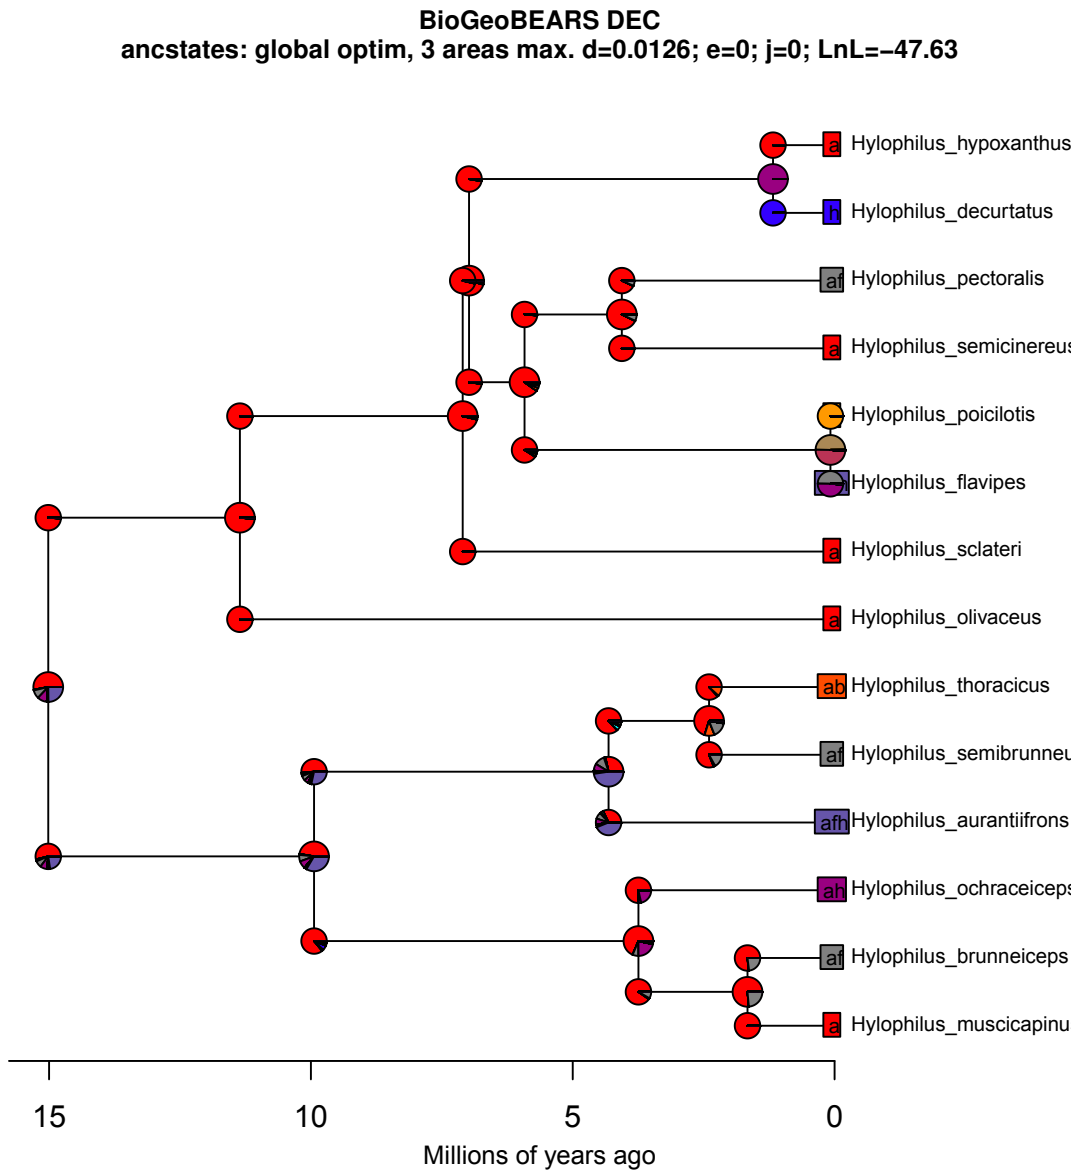

Figure S5: Clades of birds

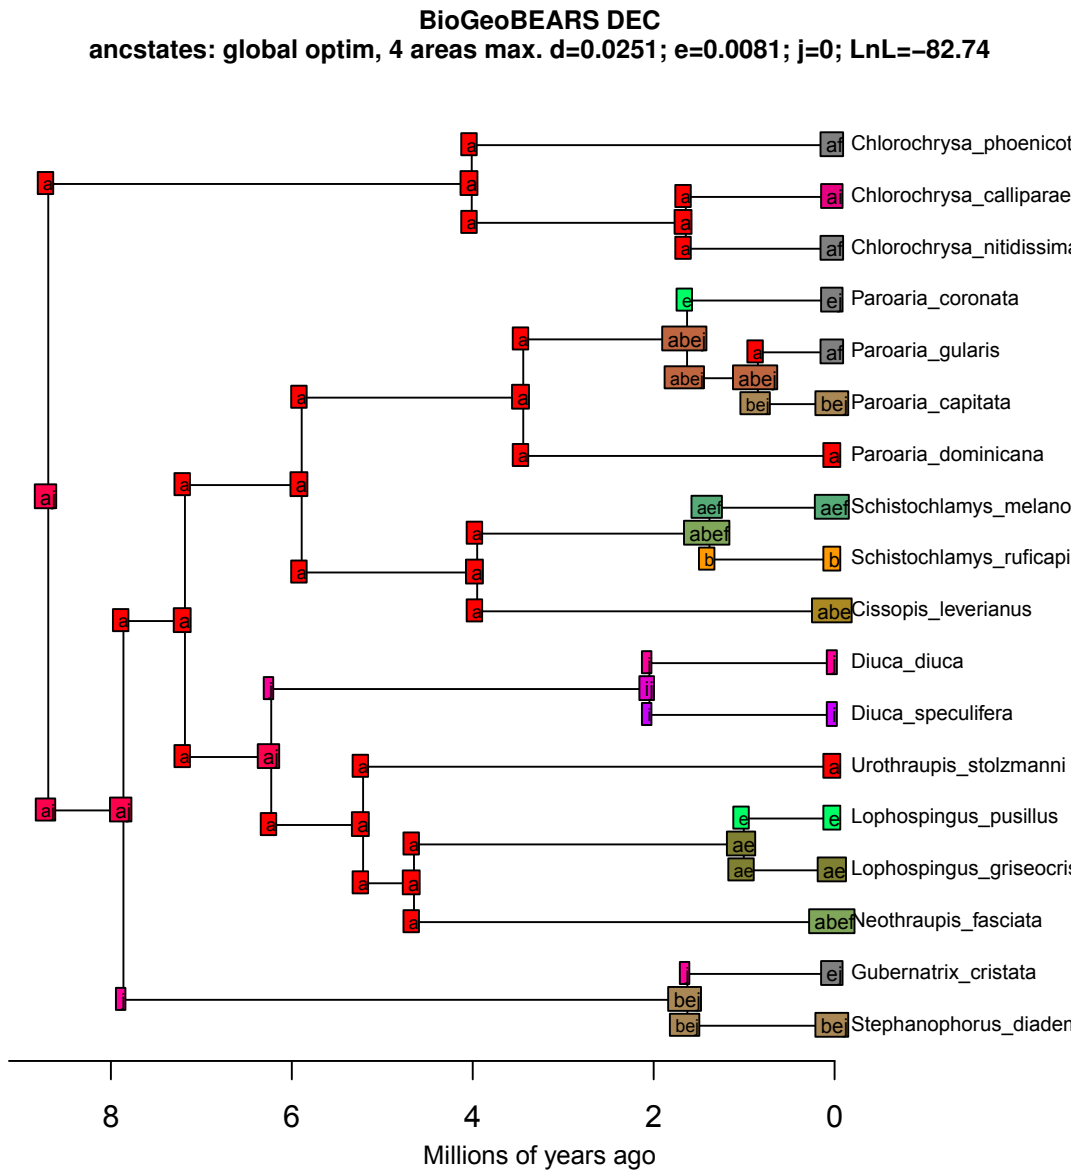

Figure S5: Clades of birds

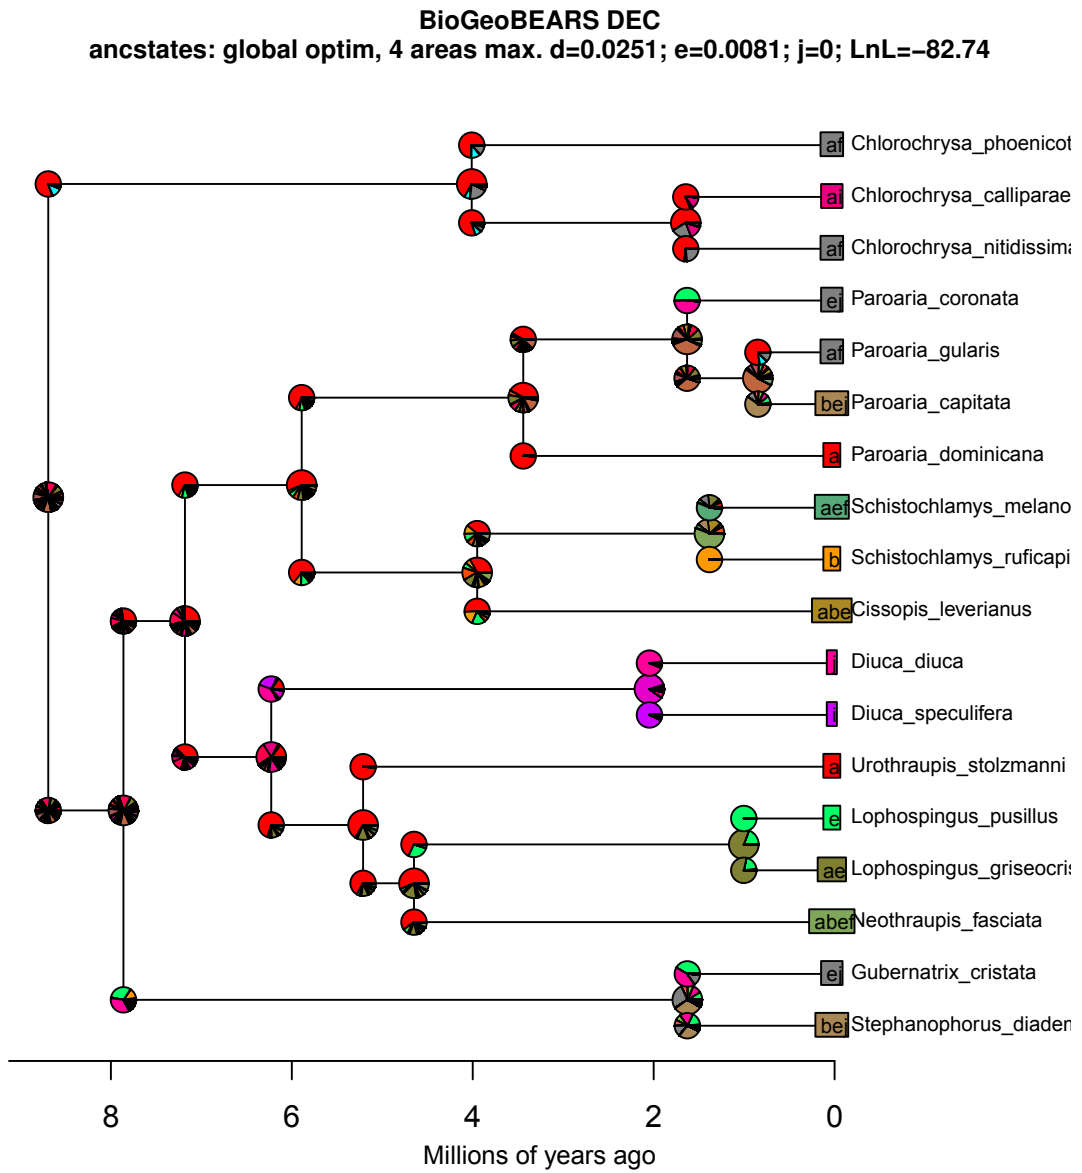

Figure S5: Clades of birds

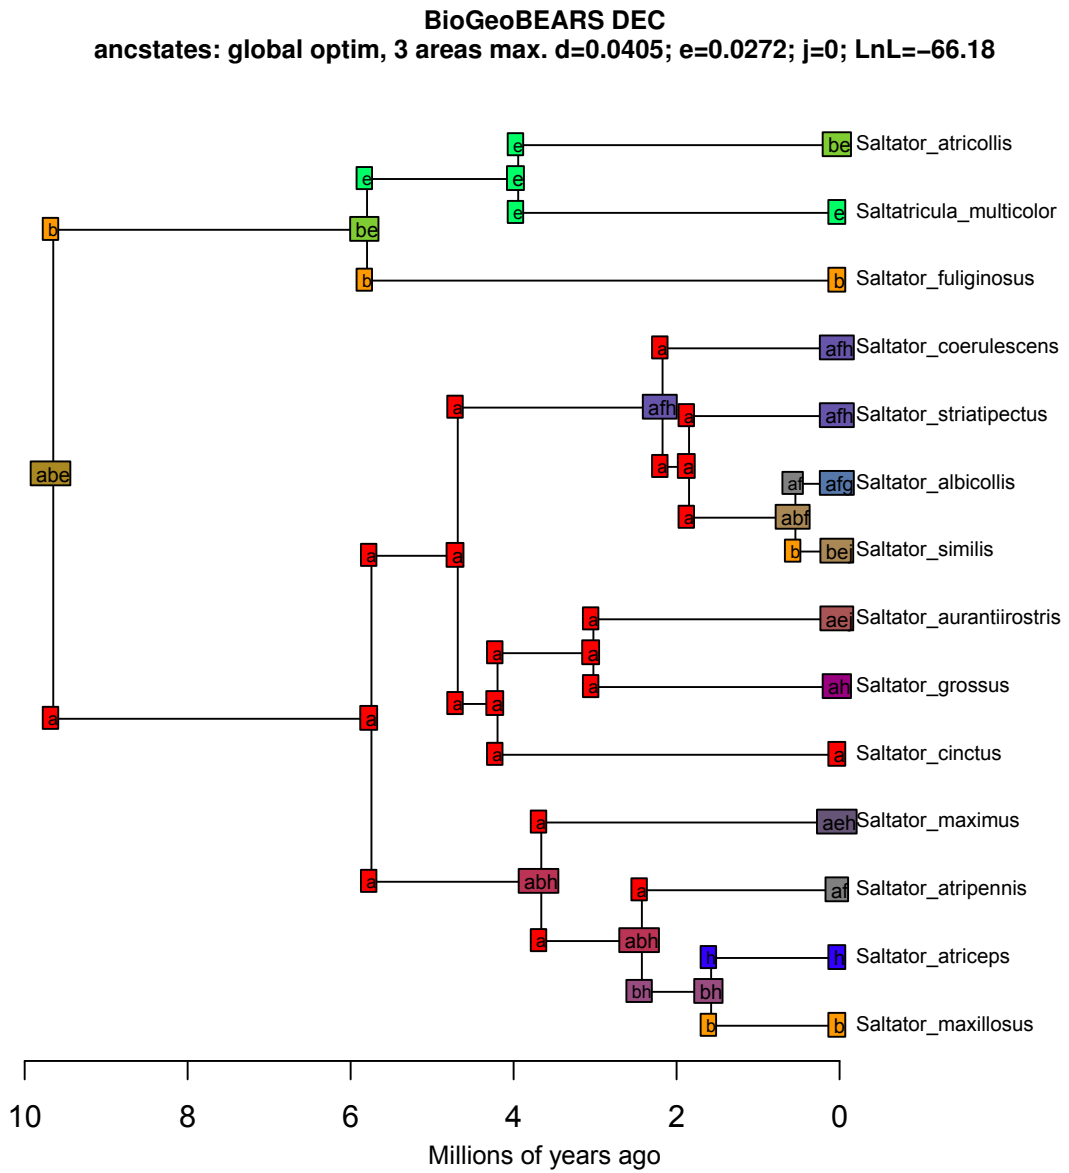

Figure S5: Clades of birds

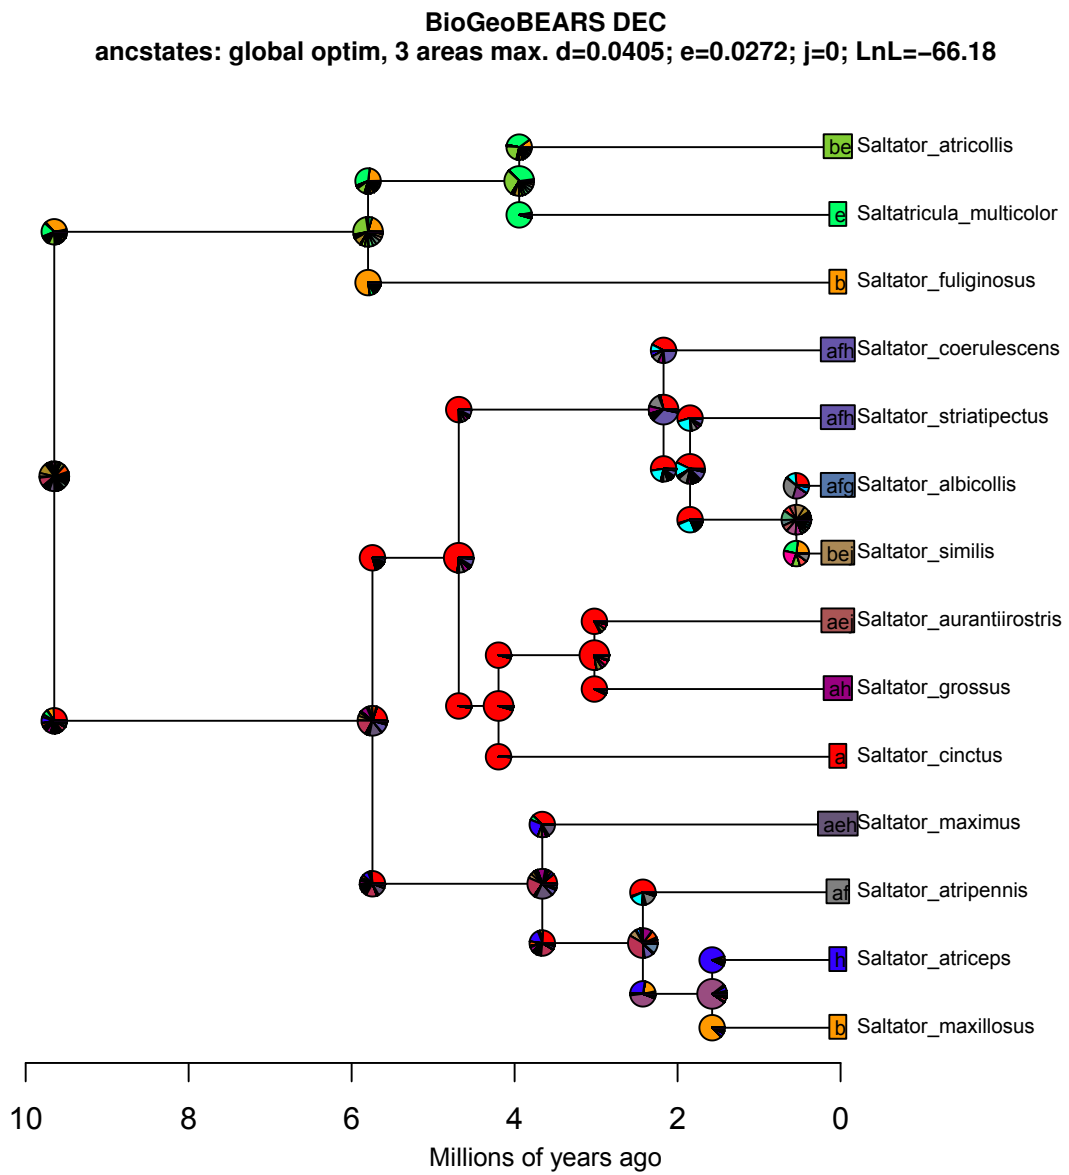

Figure S5: Clades of birds

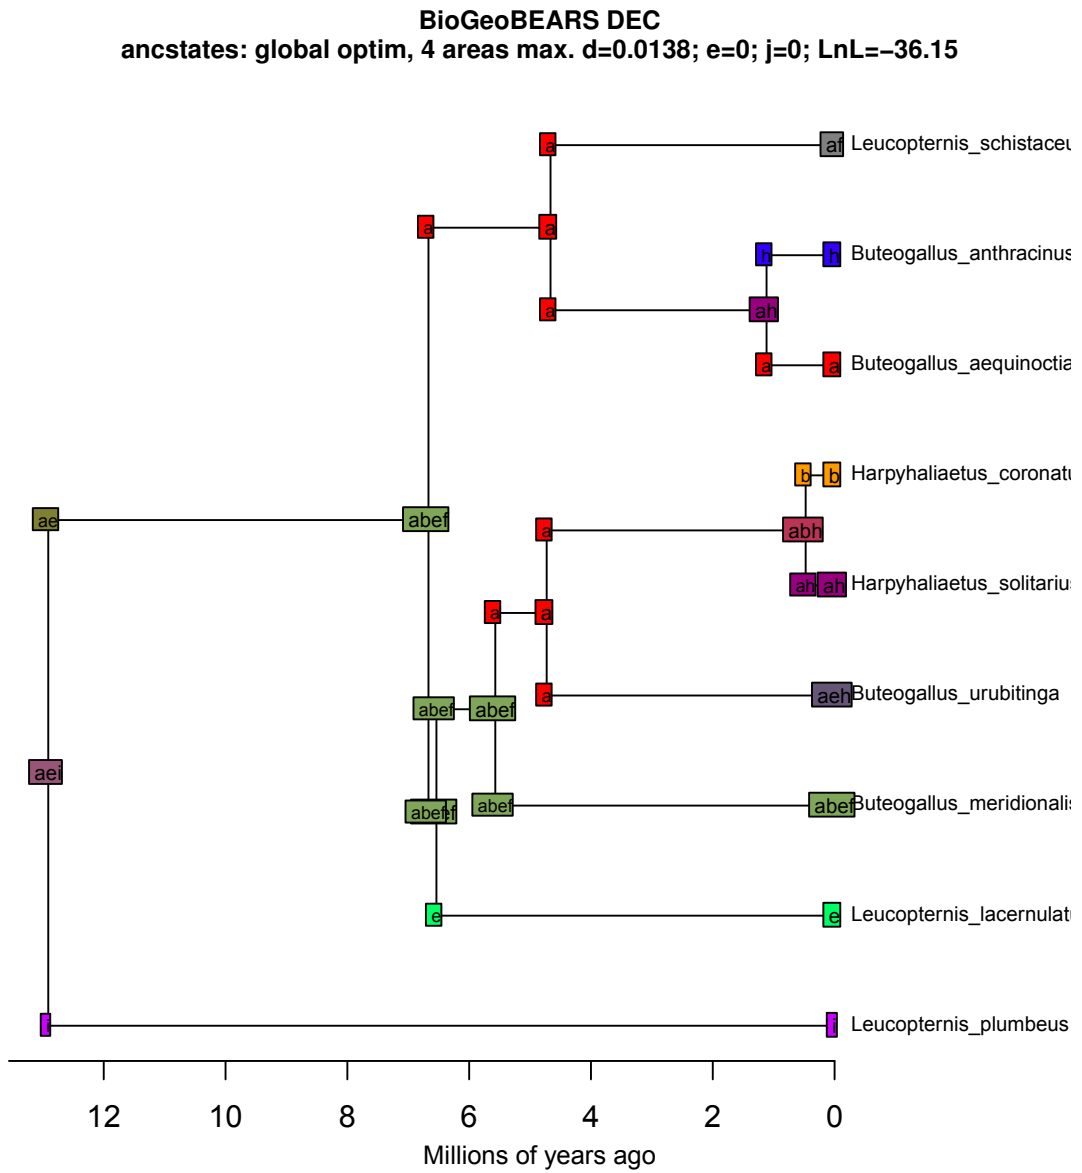



Figure S5: Clades of birds

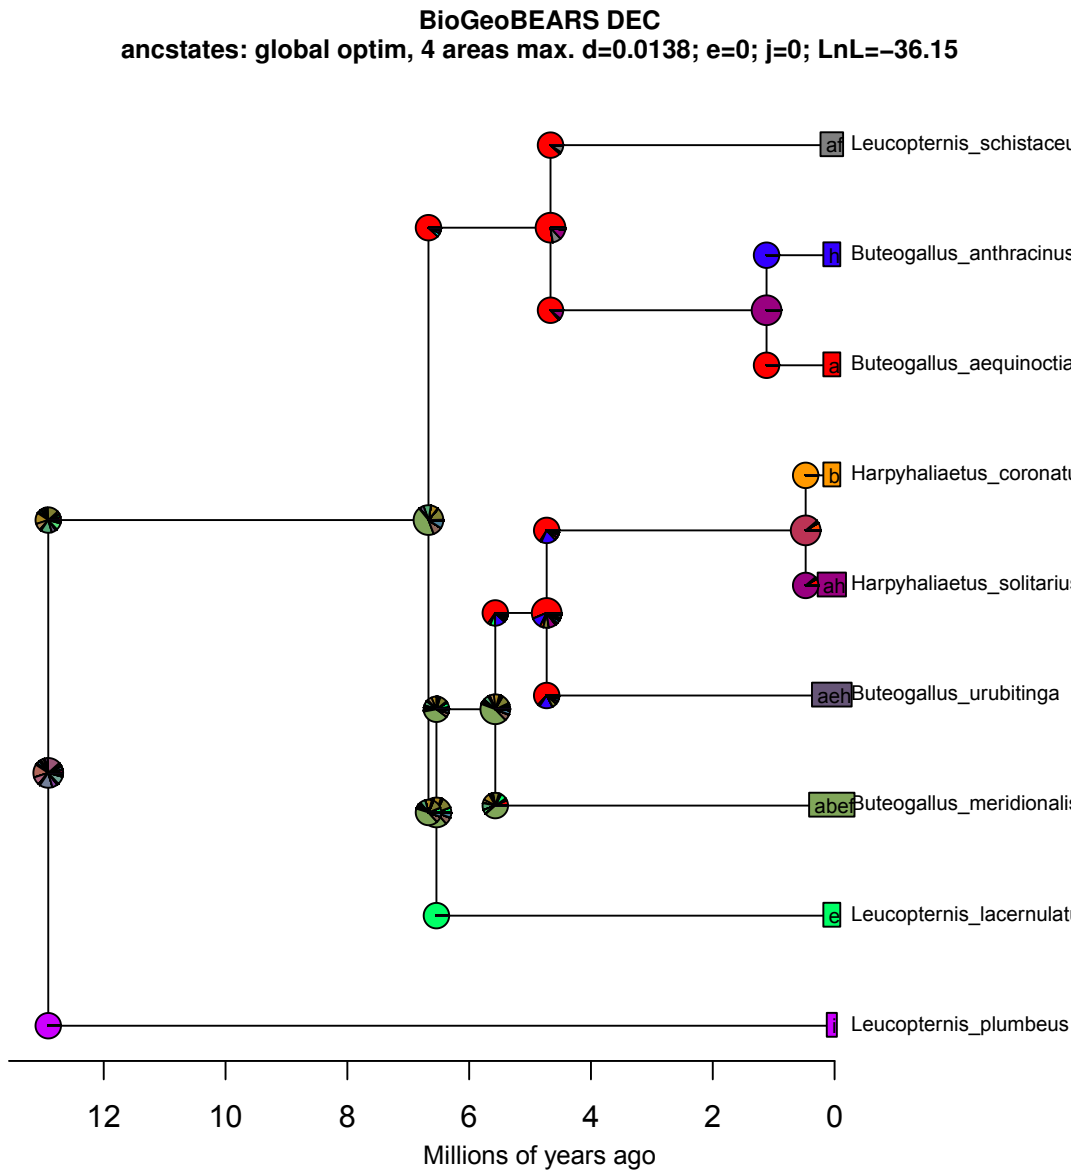

Figure S5: Clades of birds

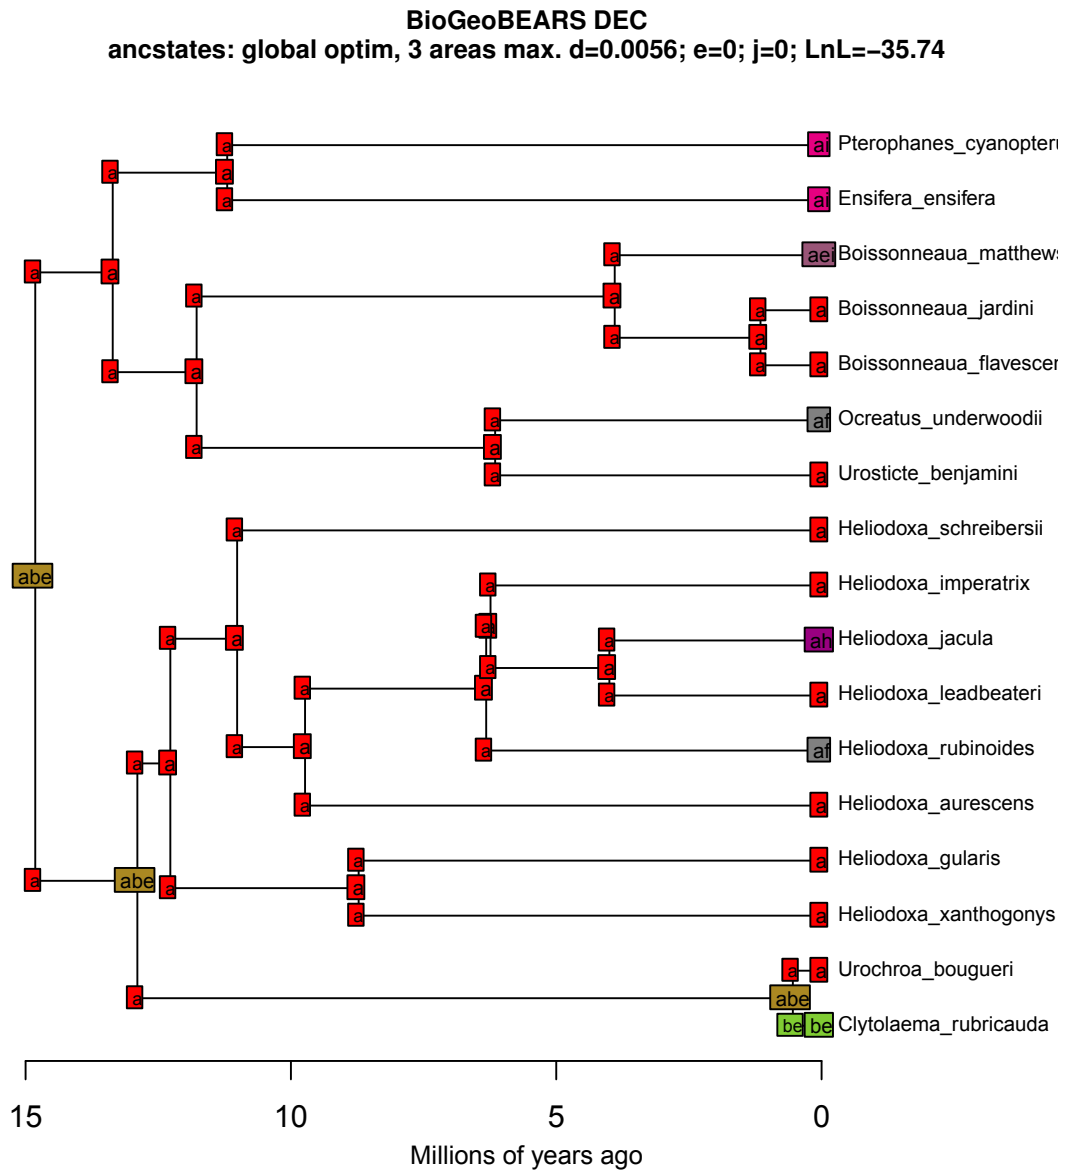

Figure S5: Clades of birds

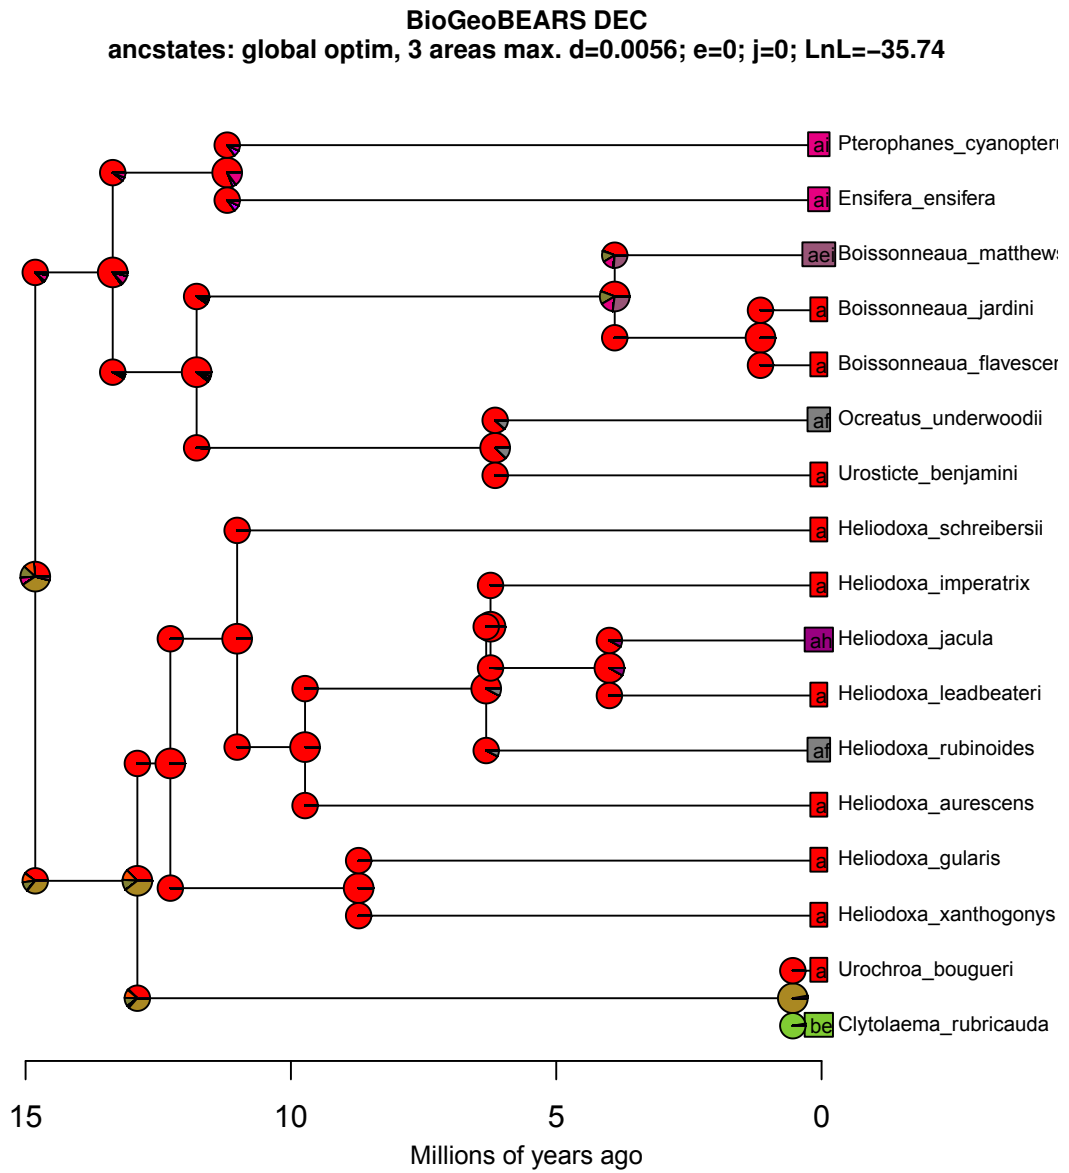

Figure S5: Clades of birds

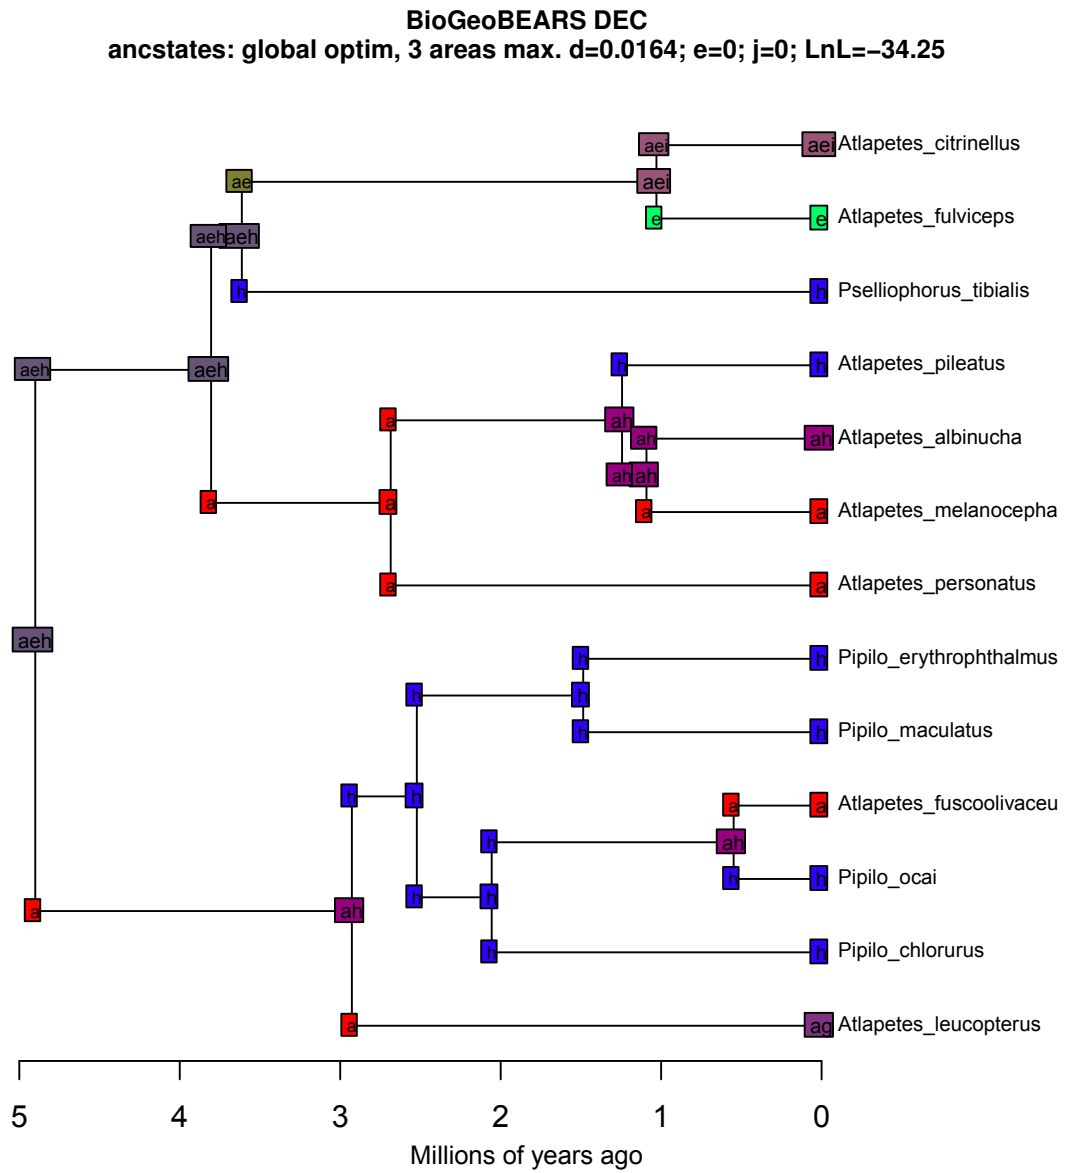

Figure S5: Clades of birds

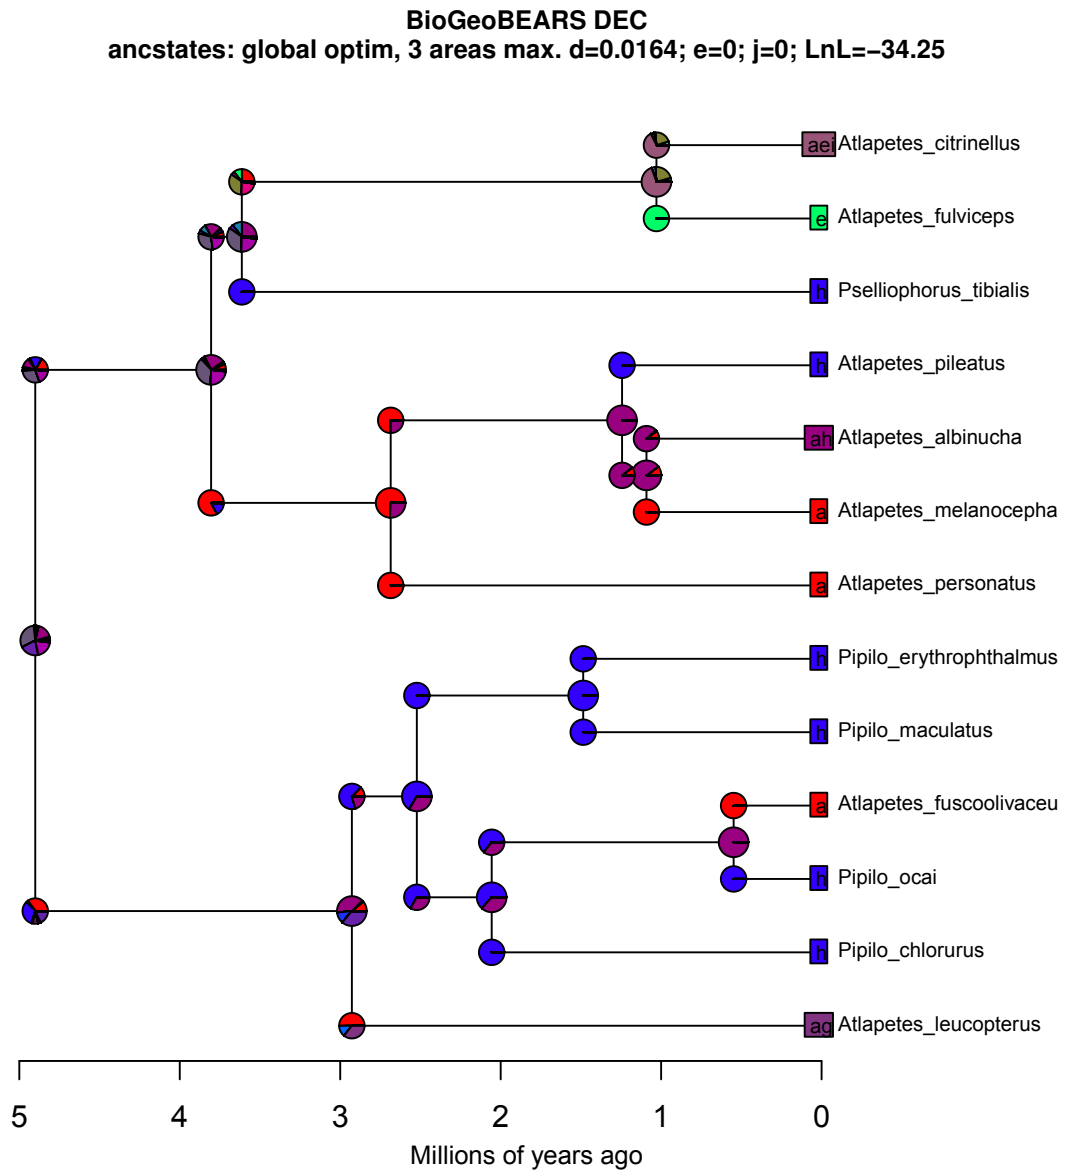

Figure S5: Clades of birds

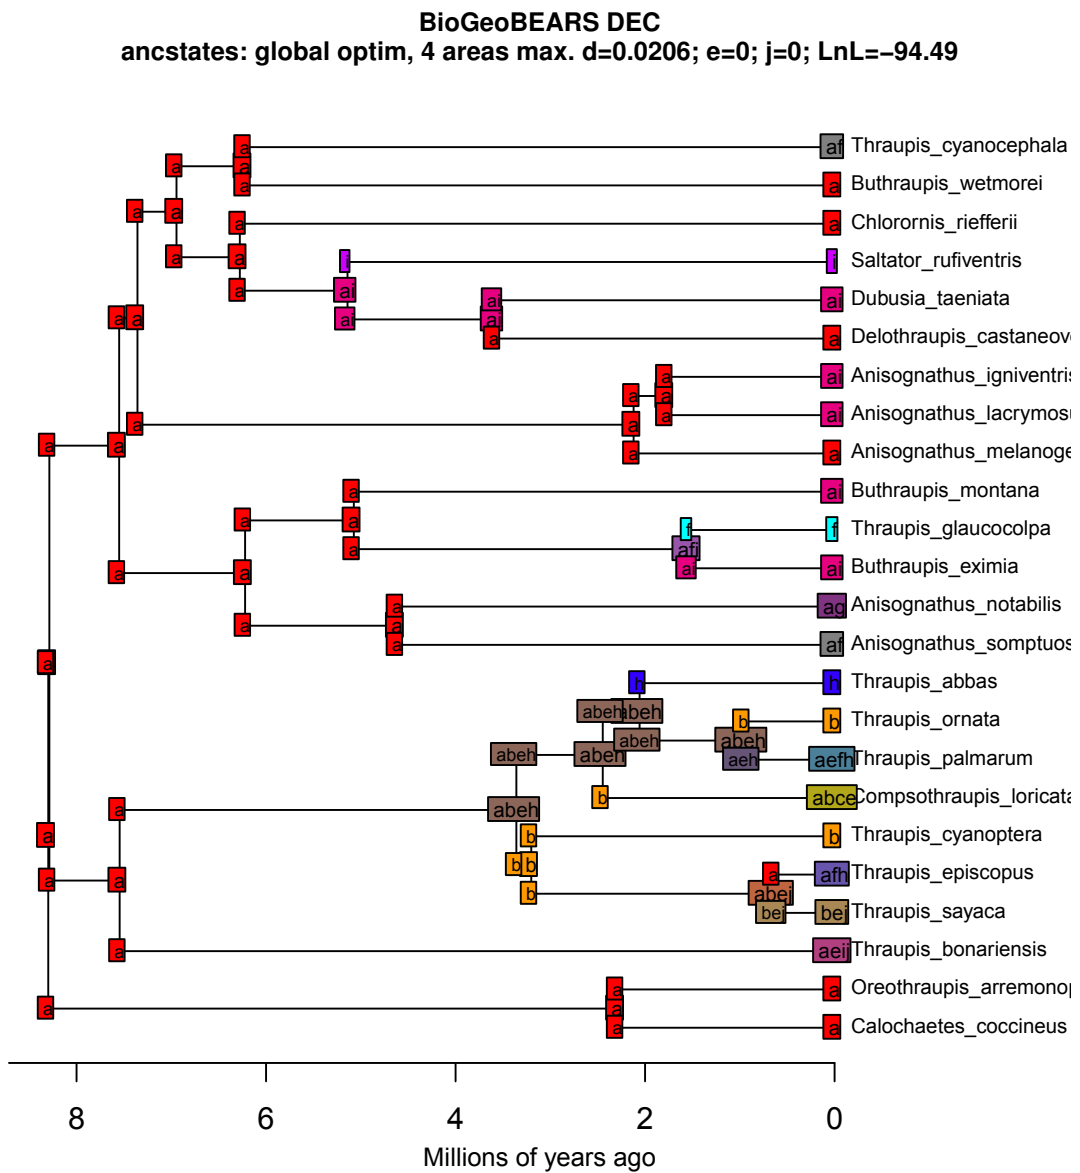

Figure S5: Clades of birds

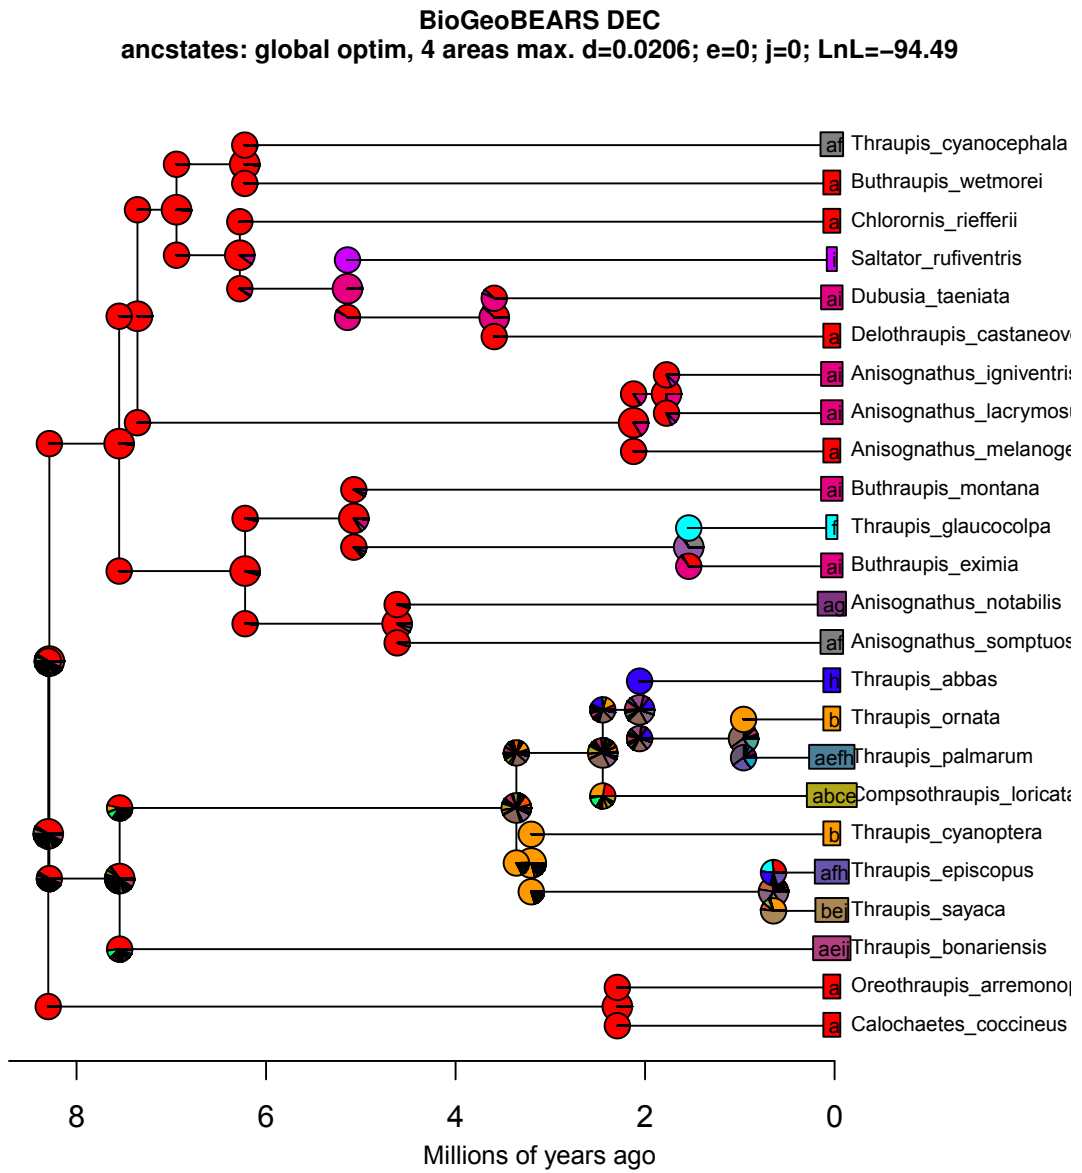

Figure S5: Clades of birds

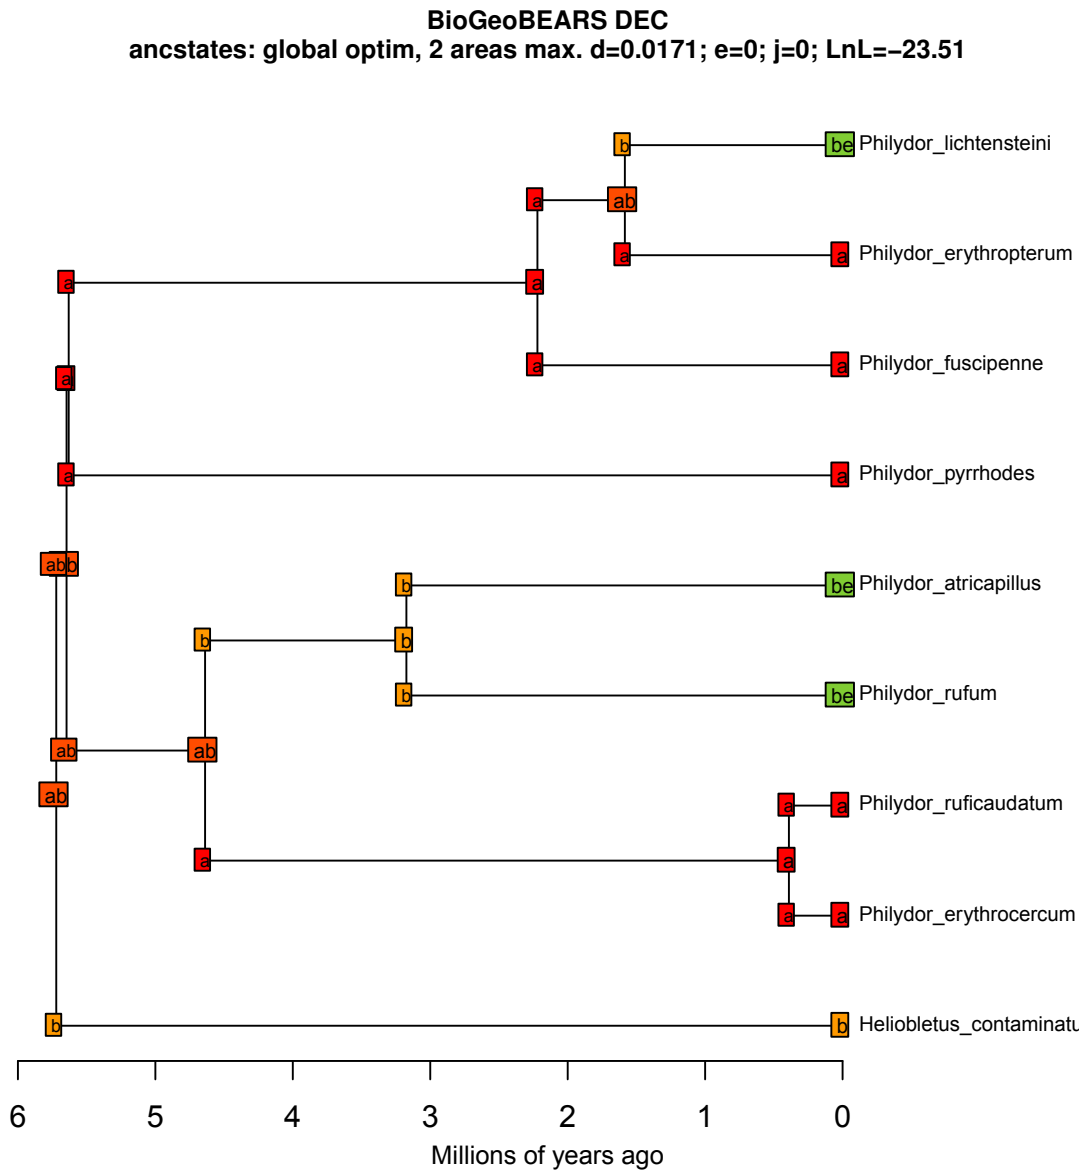



Figure S5: Clades of birds

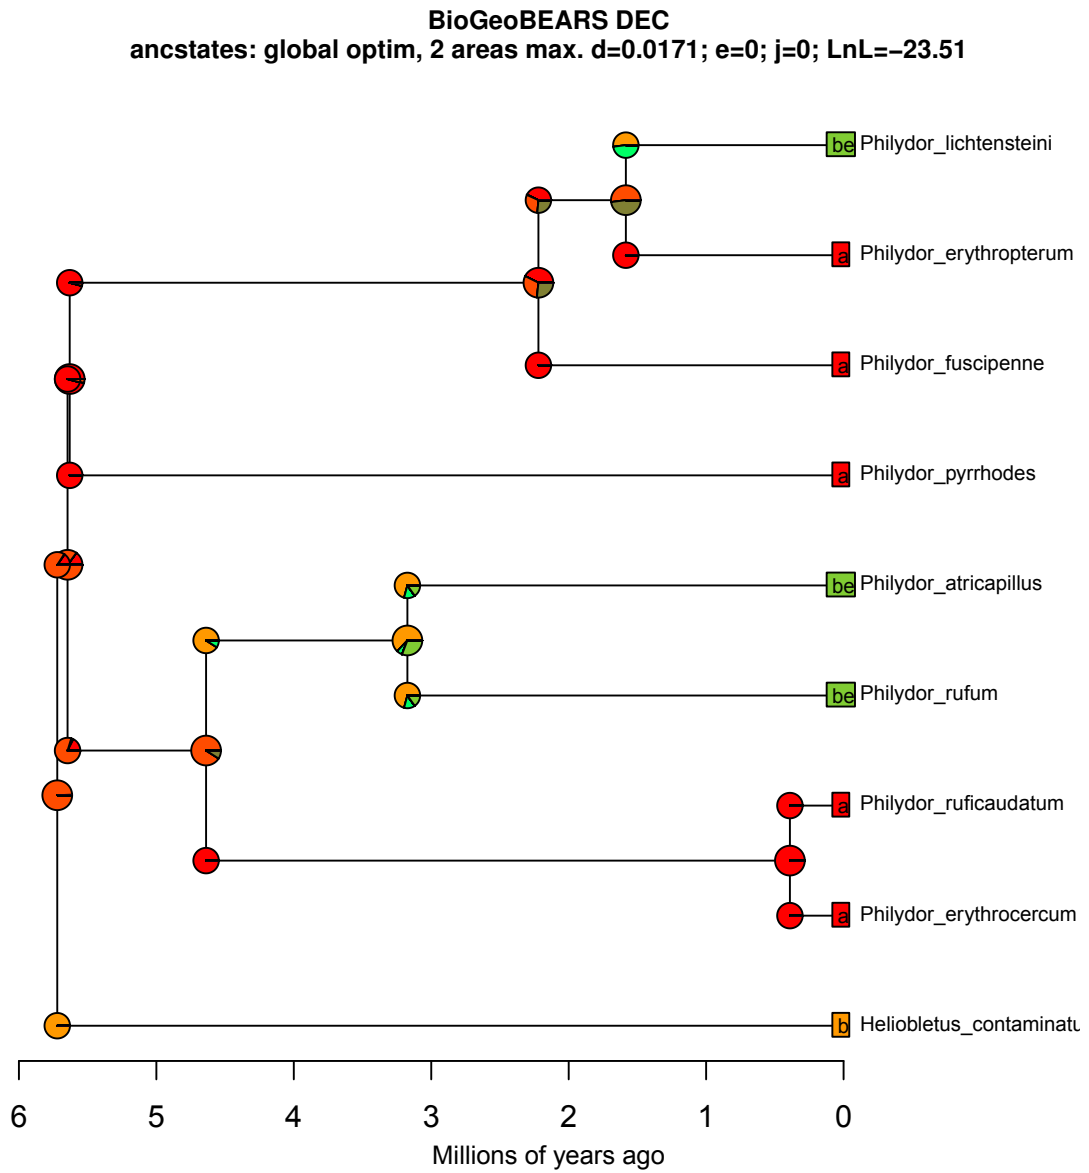

Figure S5: Clades of birds

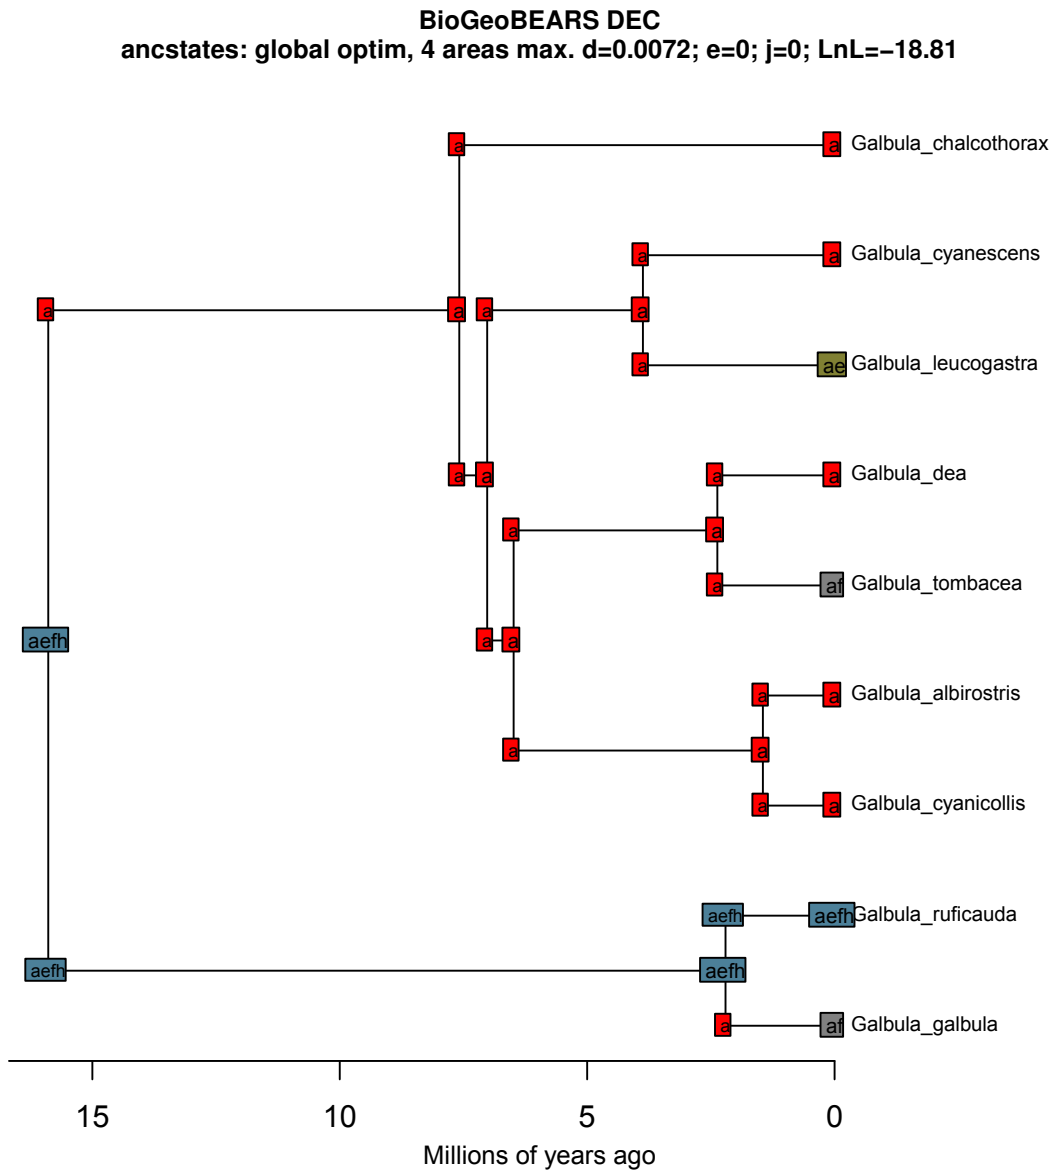

Figure S5: Clades of birds

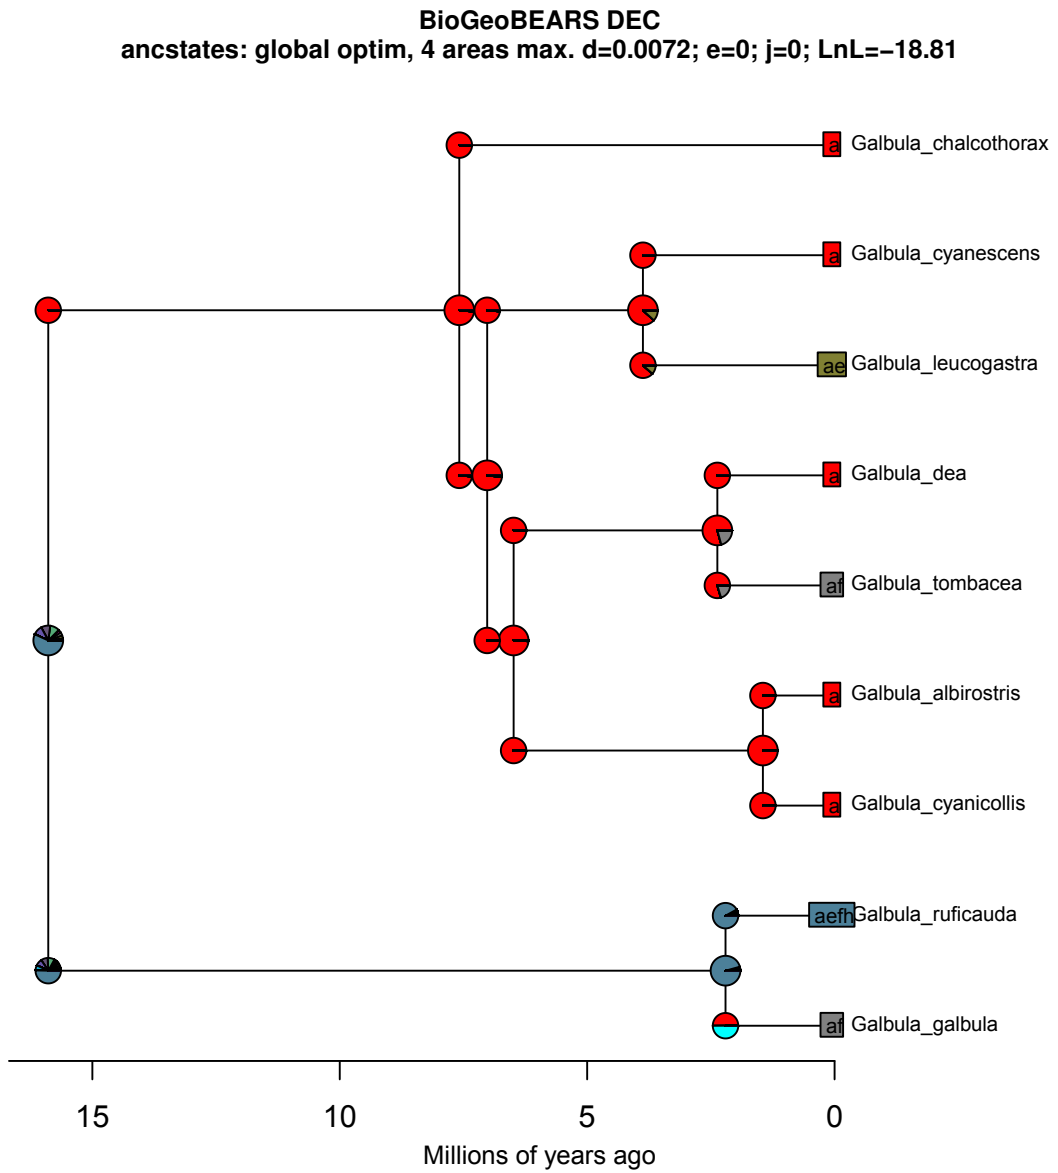

Figure S5: Clades of birds

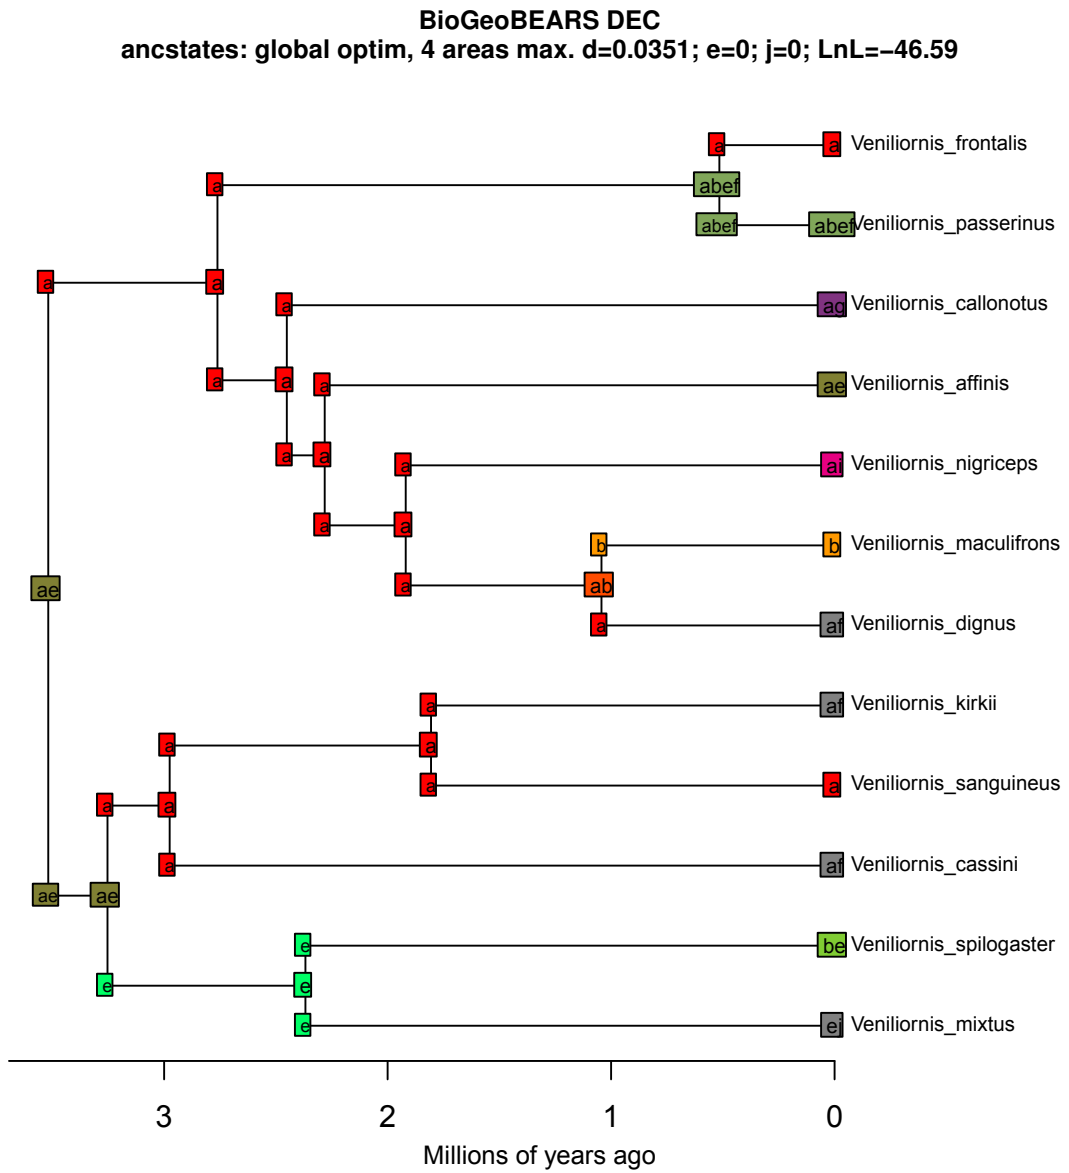

Figure S5: Clades of birds

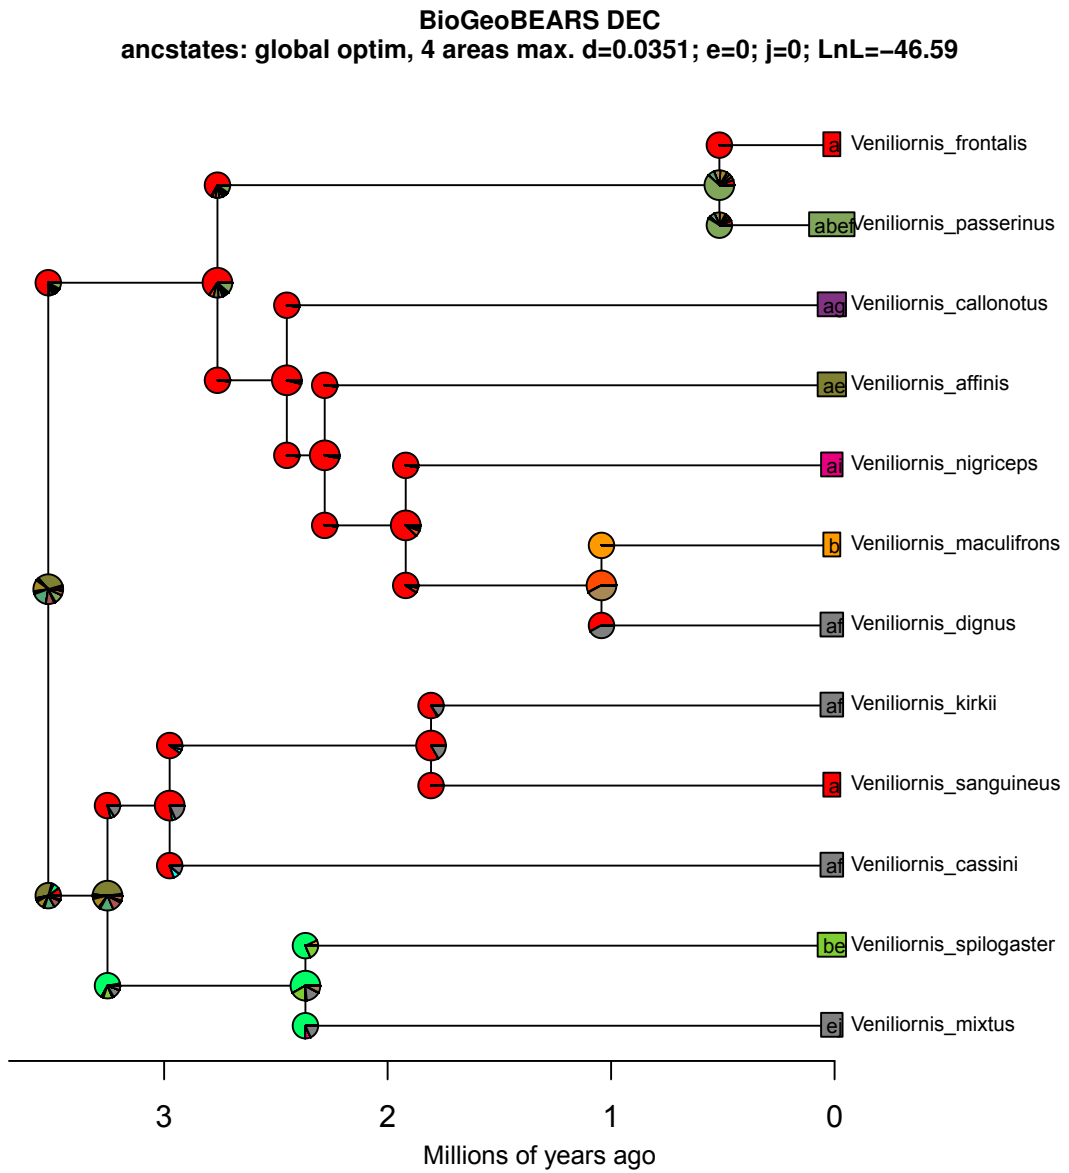

Figure S5: Clades of birds

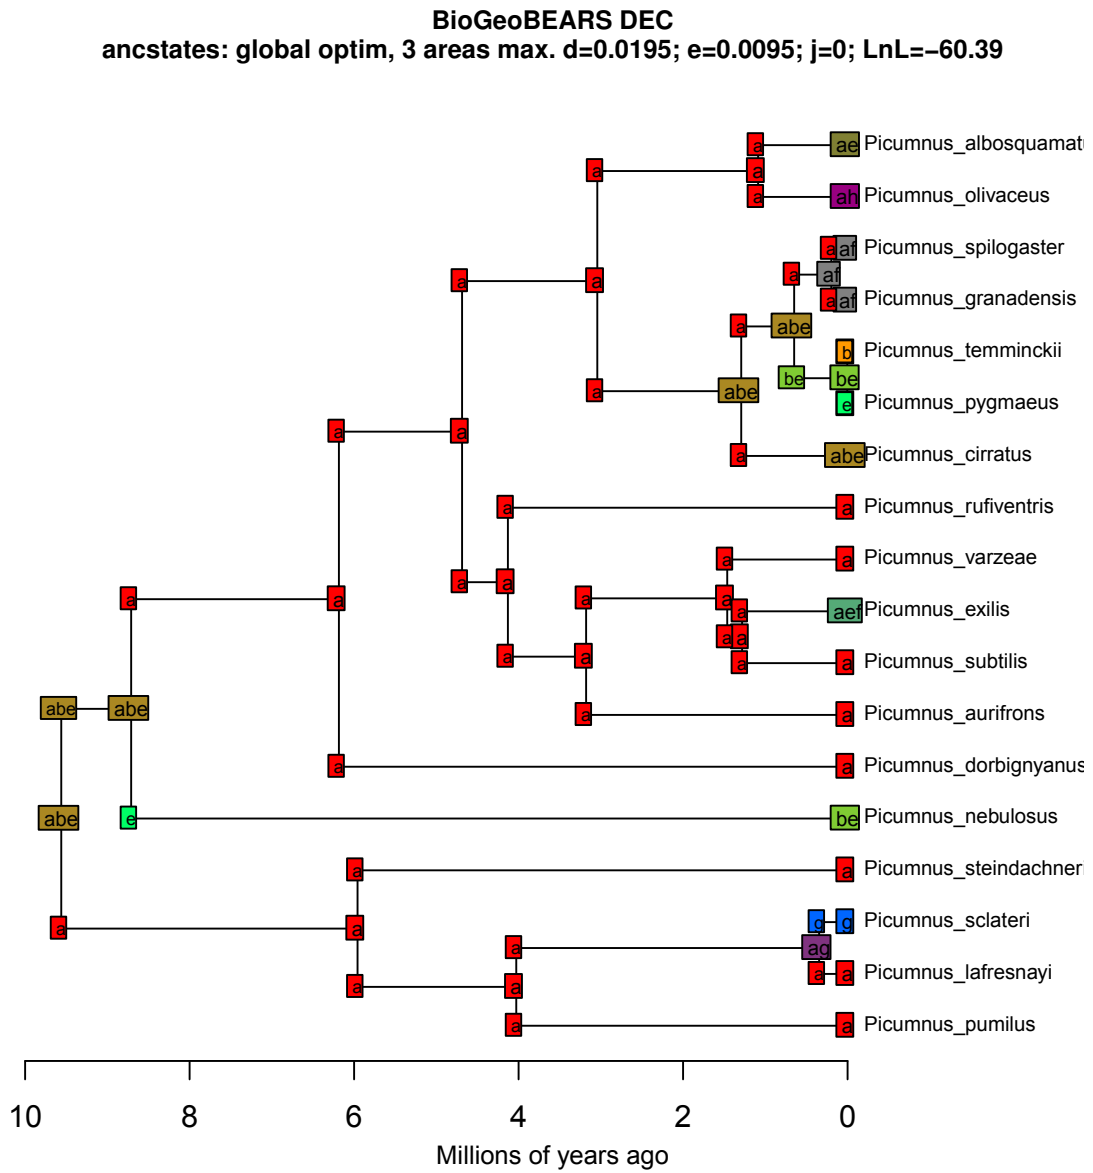

Figure S5: Clades of birds

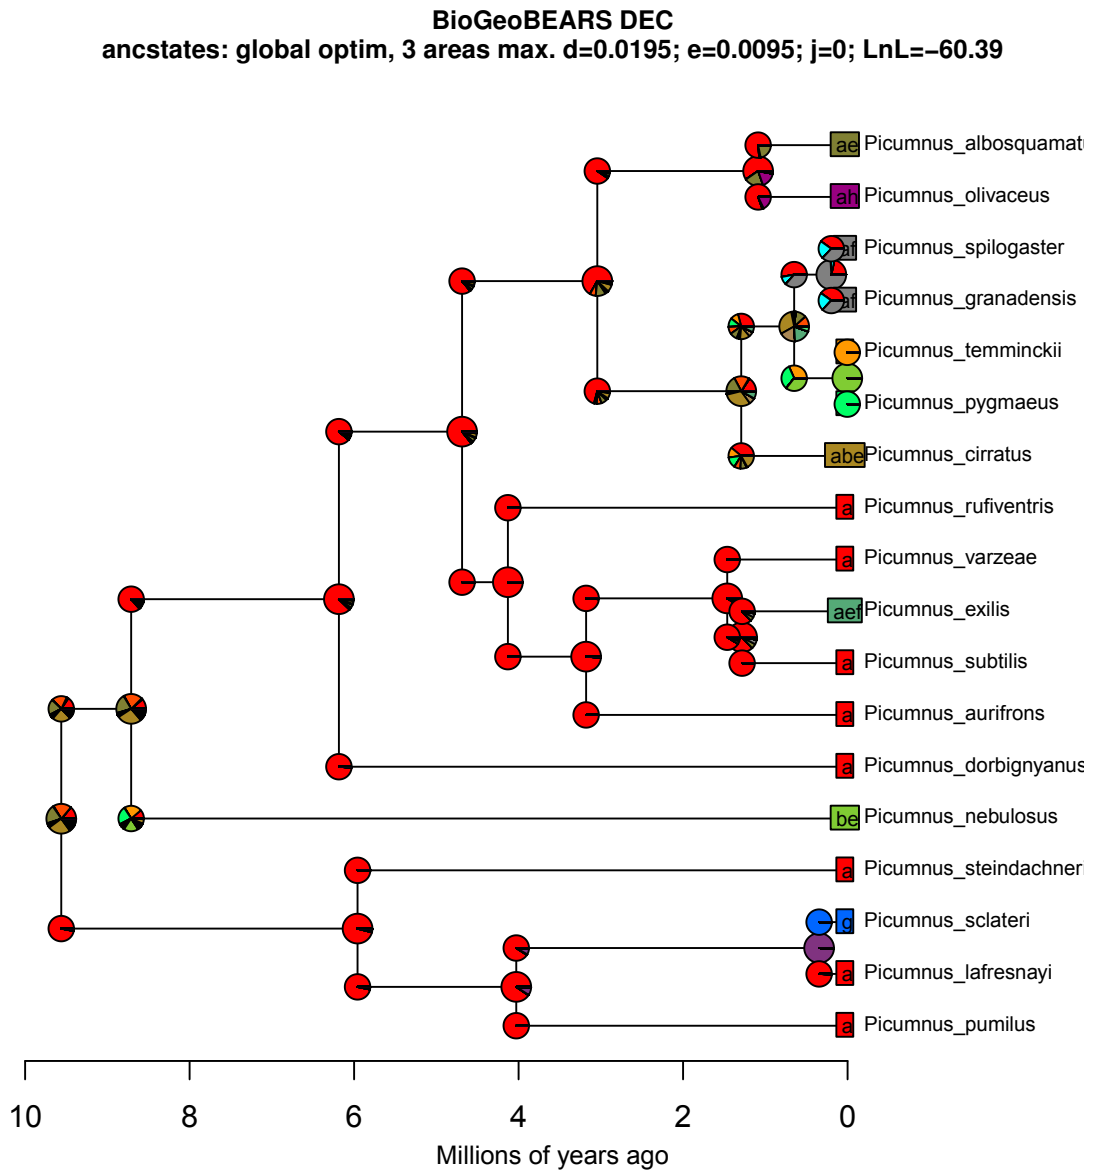

Figure S5: Clades of birds

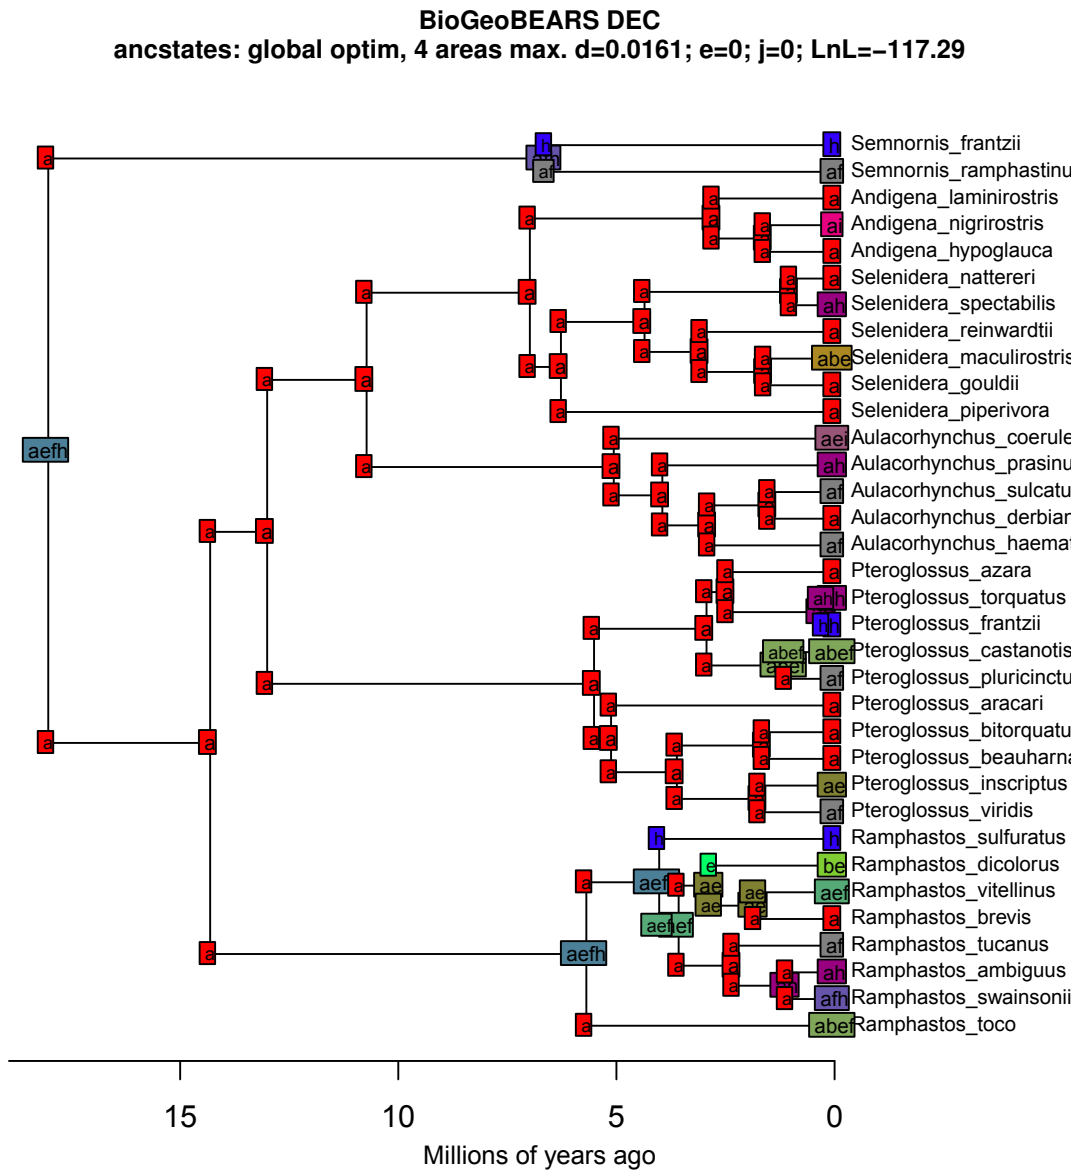



Figure S5: Clades of birds

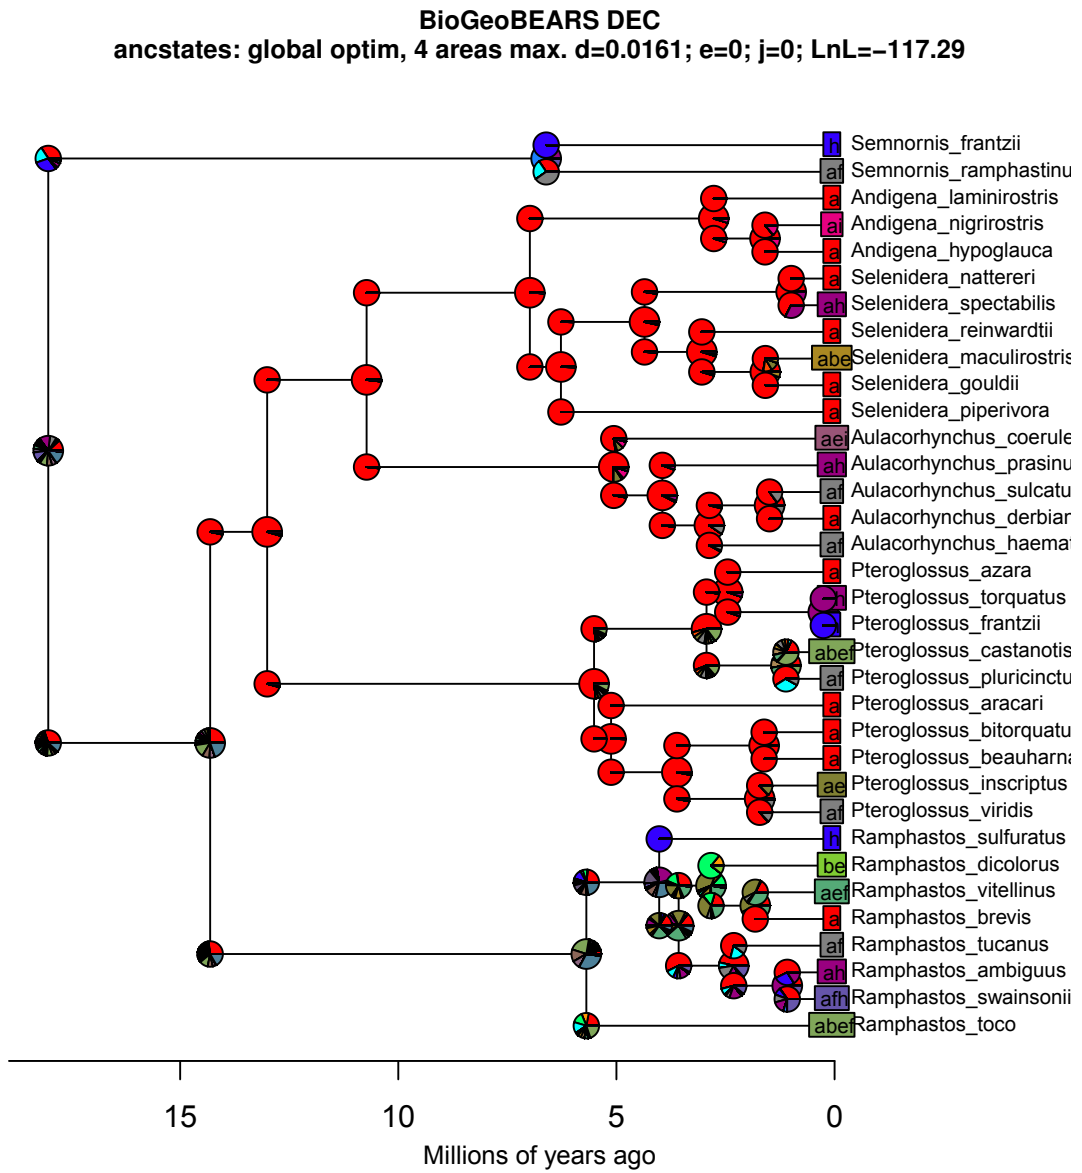

Figure S5: Clades of birds

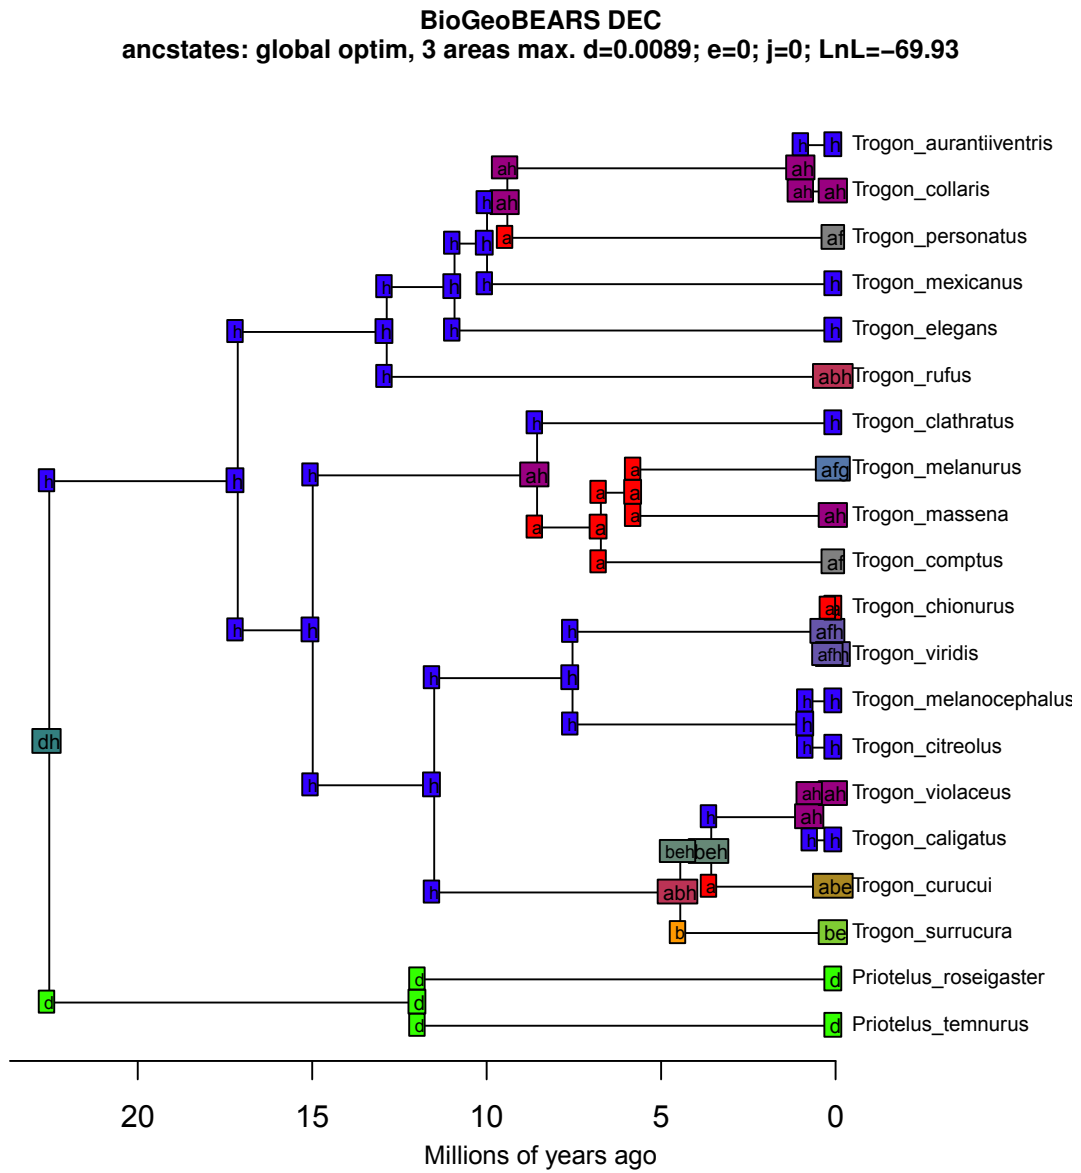

Figure S5: Clades of birds

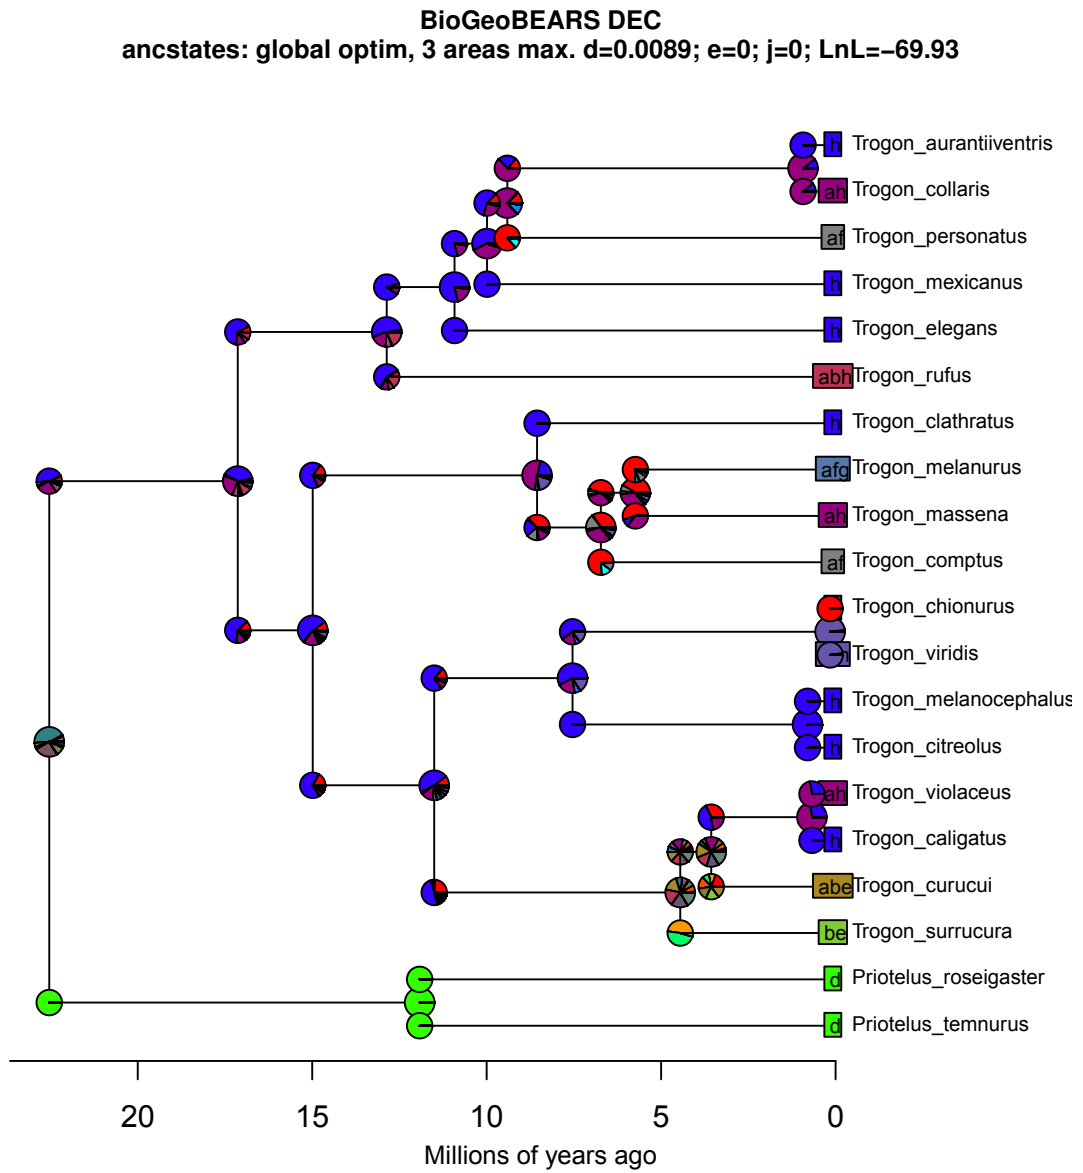

Figure S5: Clades of birds

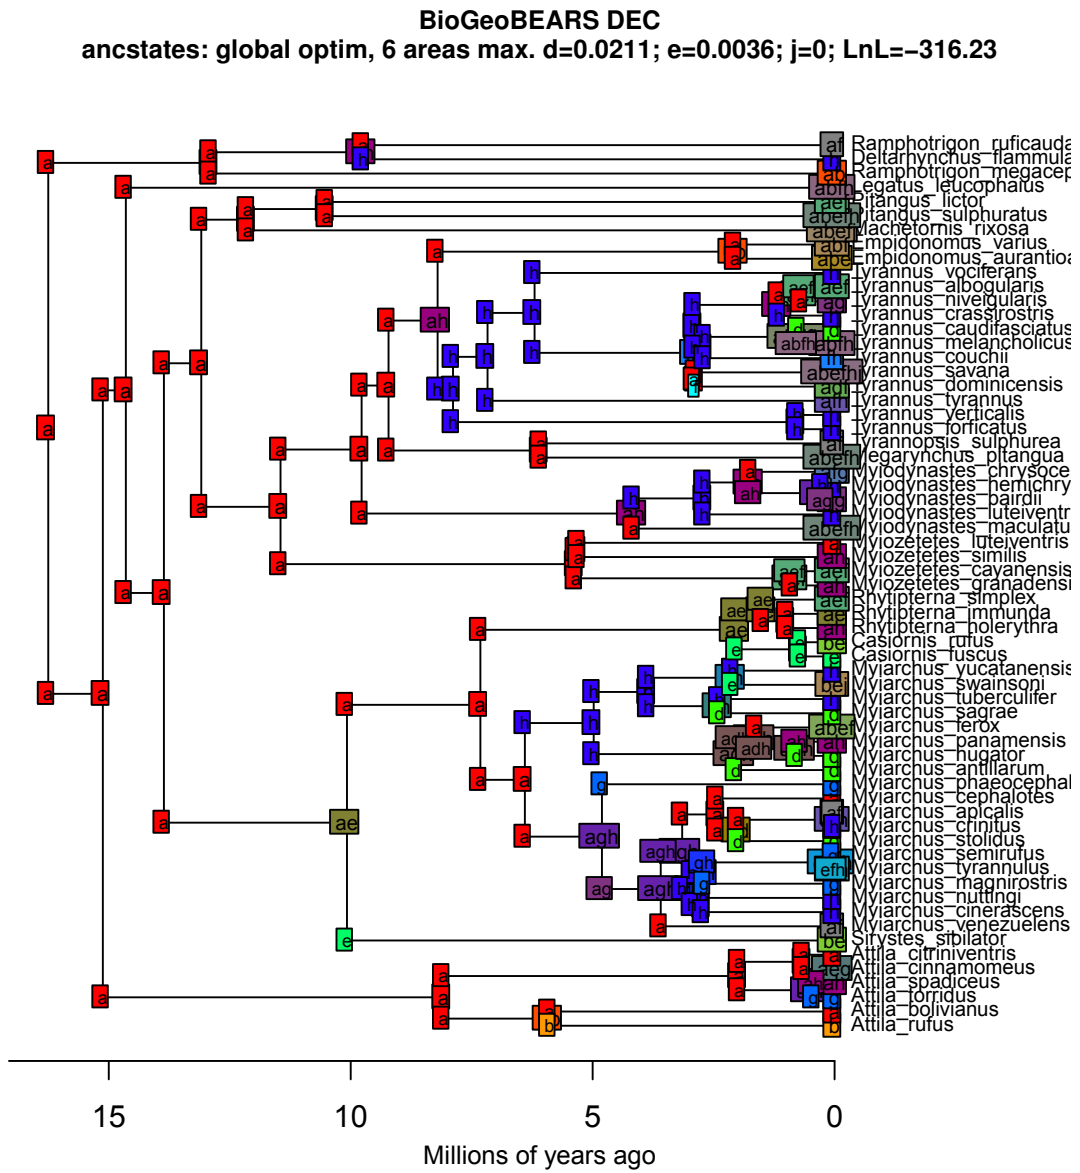

Figure S5: Clades of birds

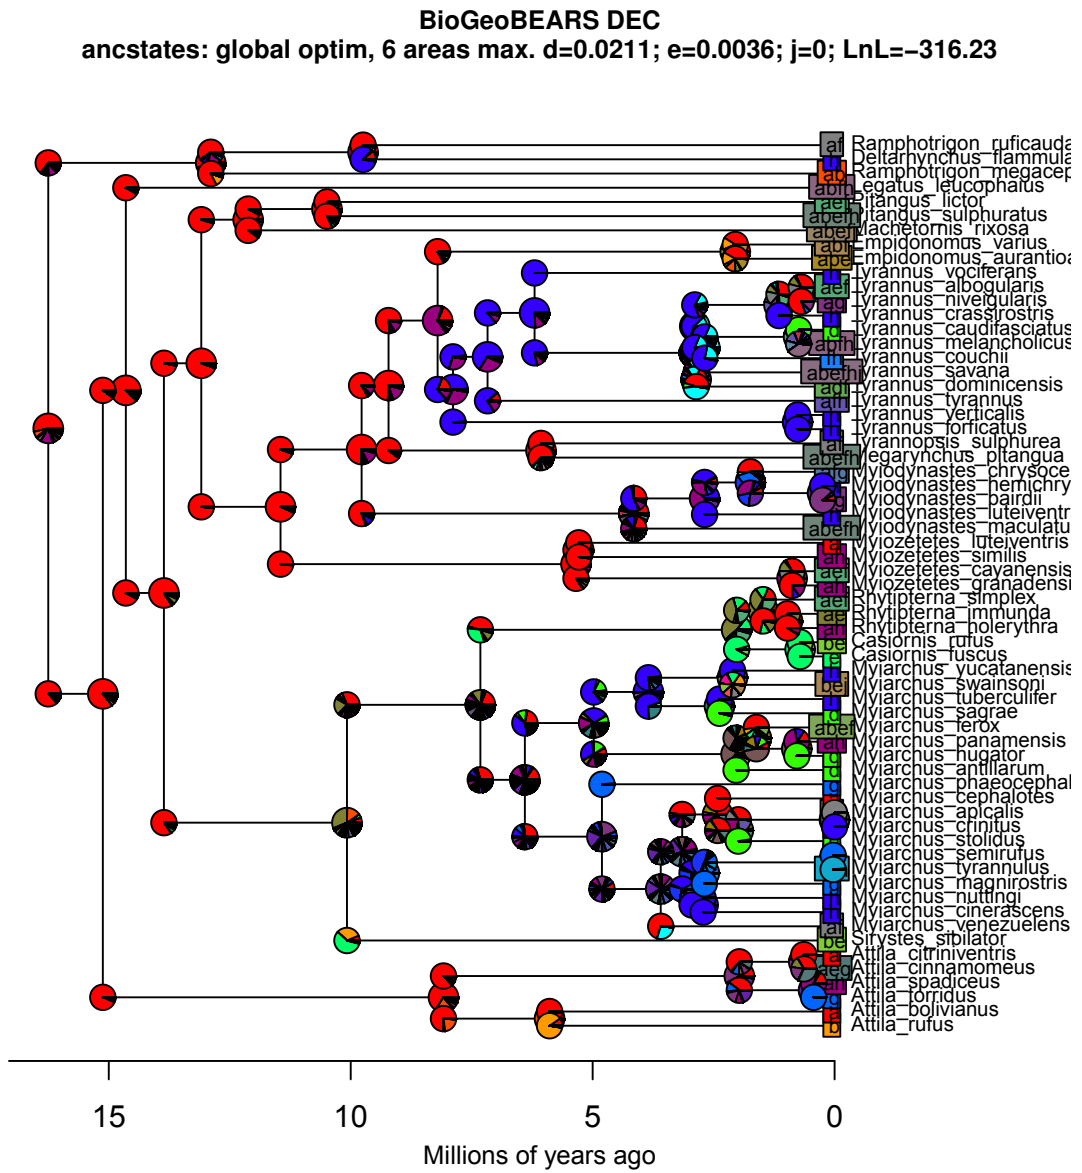

Figure S5: Clades of birds

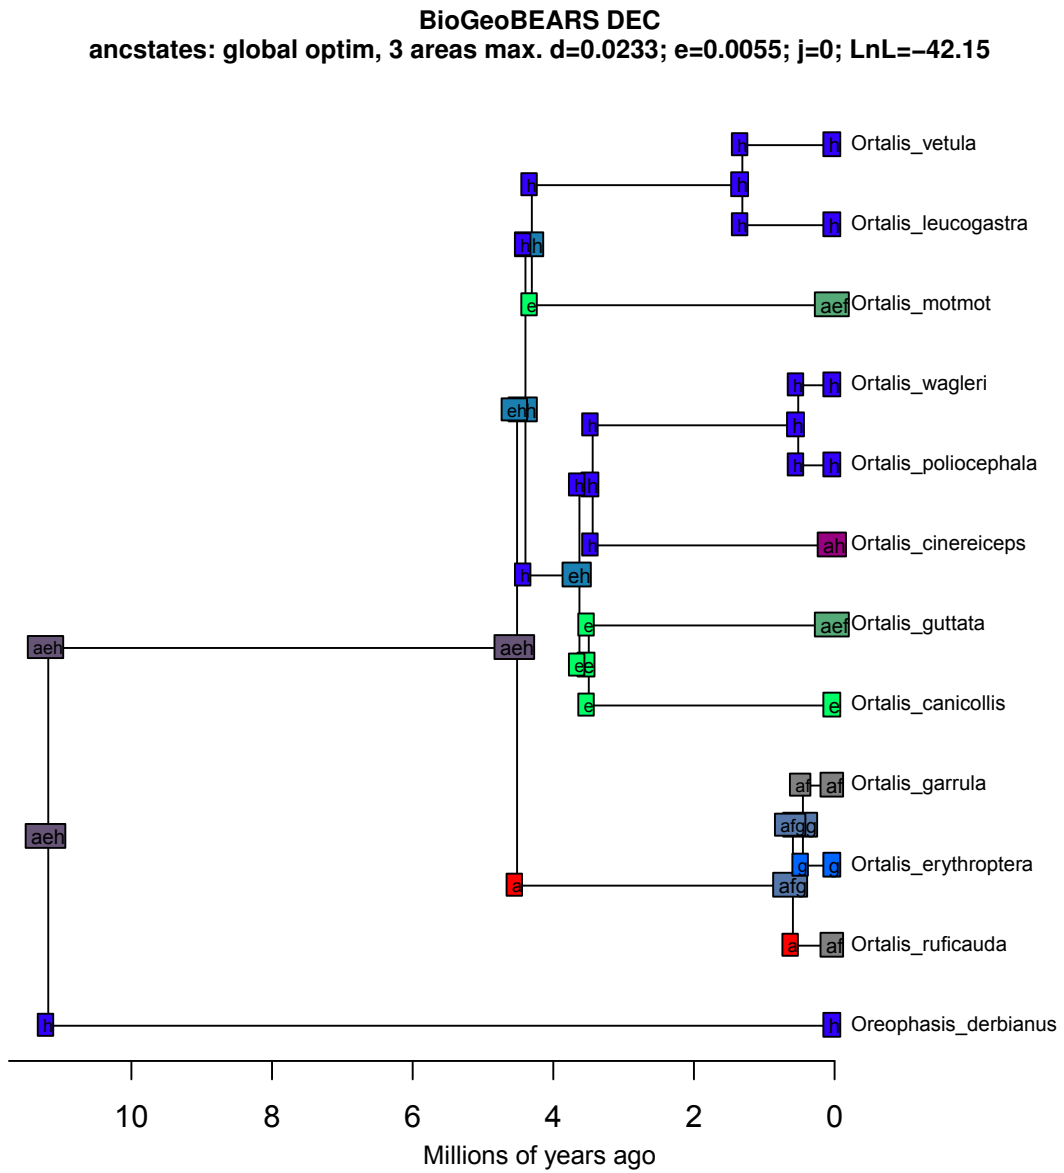

Figure S5: Clades of birds

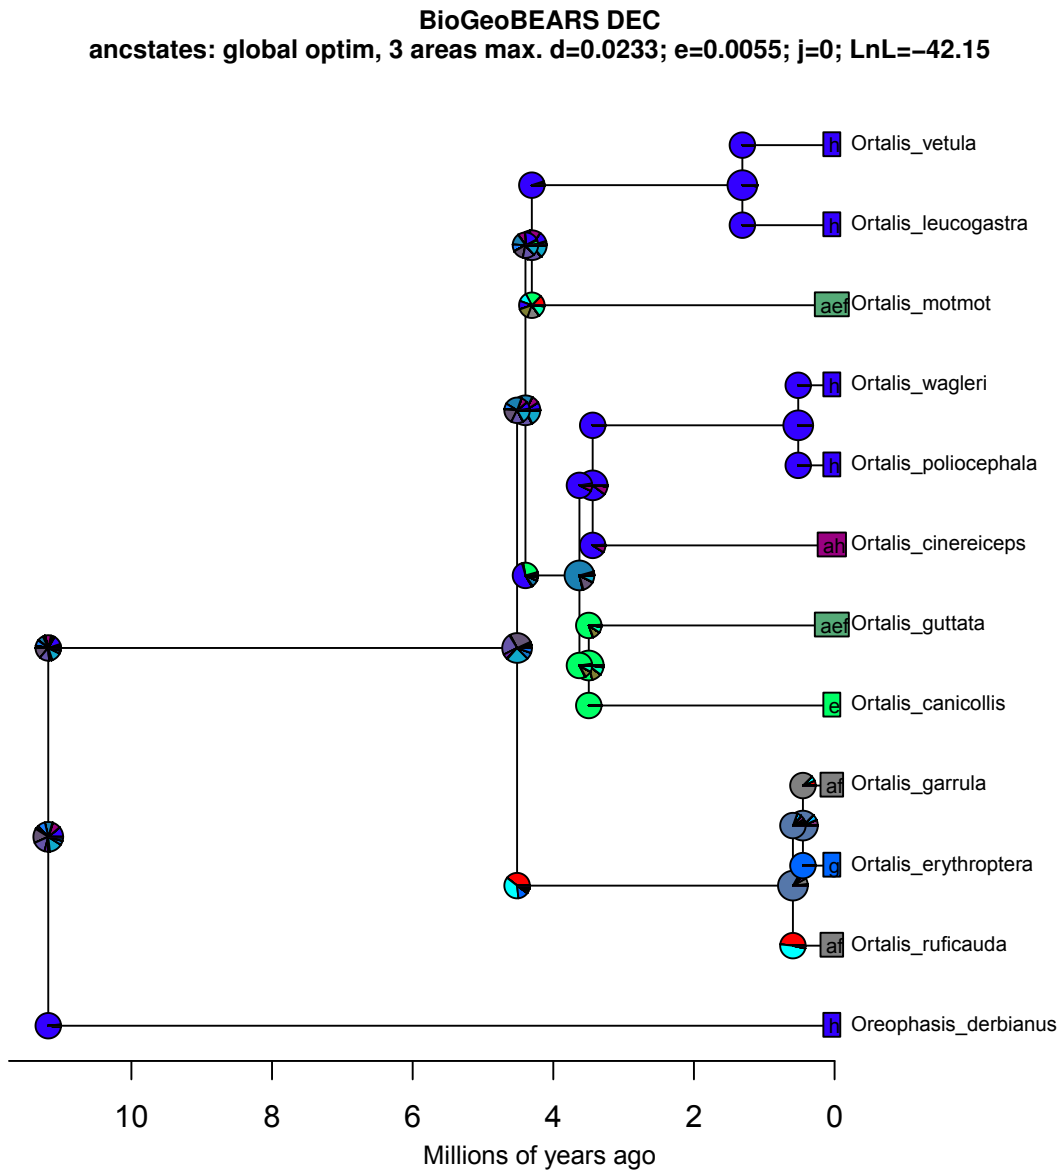

Figure S5: Clades of birds

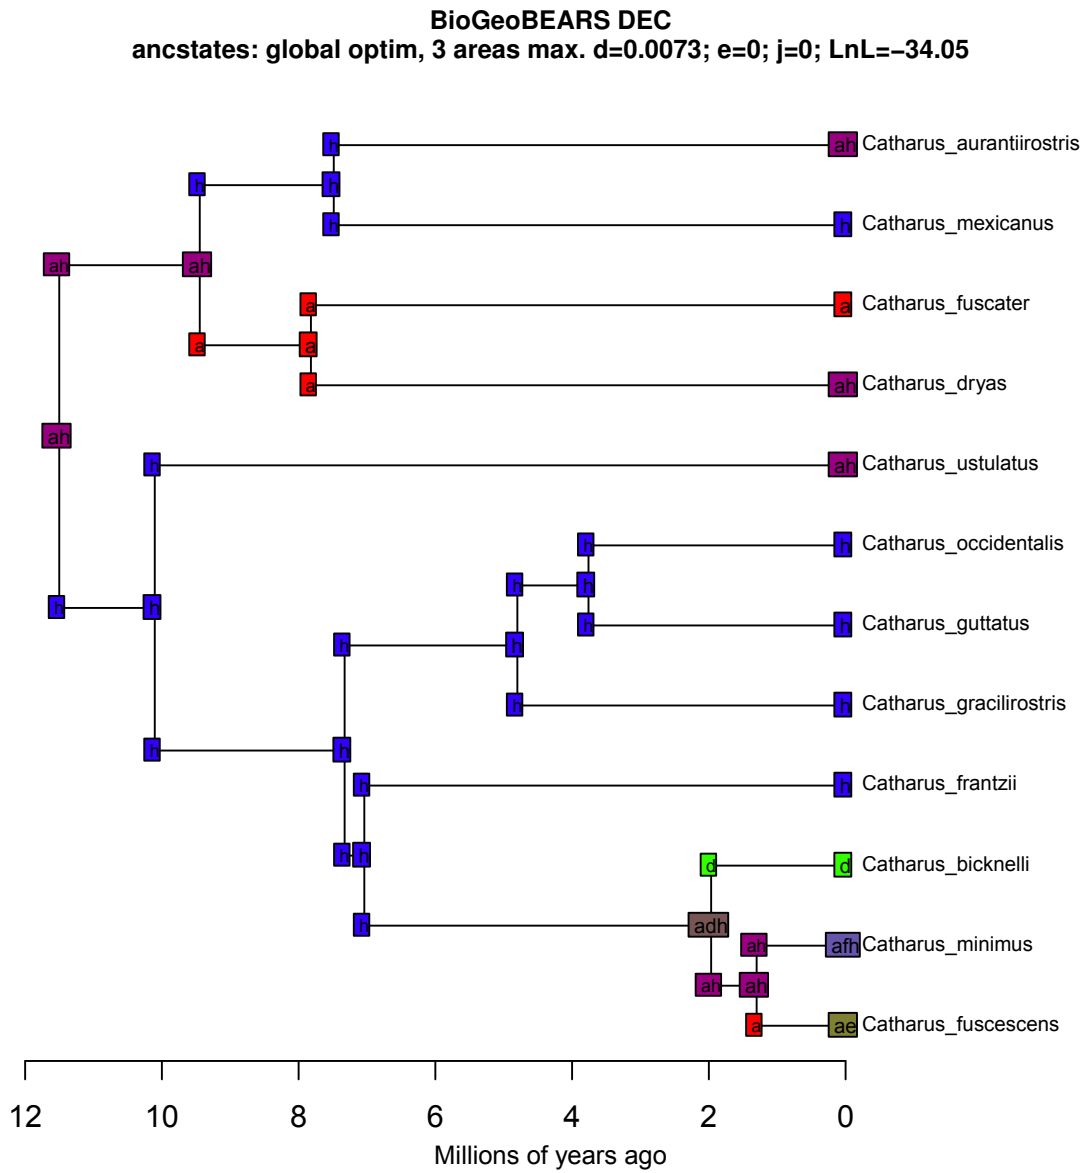



Figure S5: Clades of birds

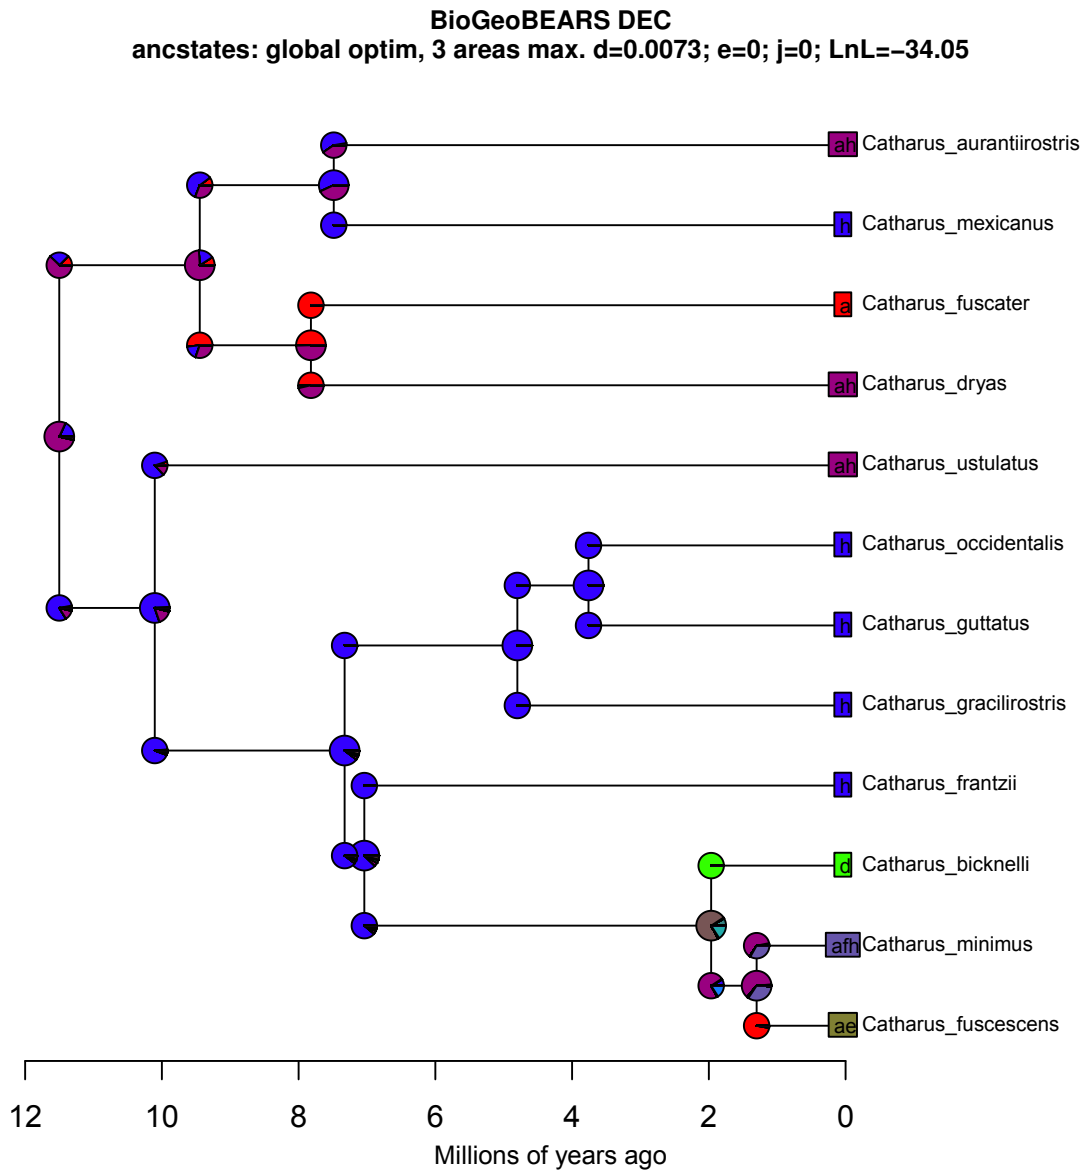

Figure S5: Clades of birds

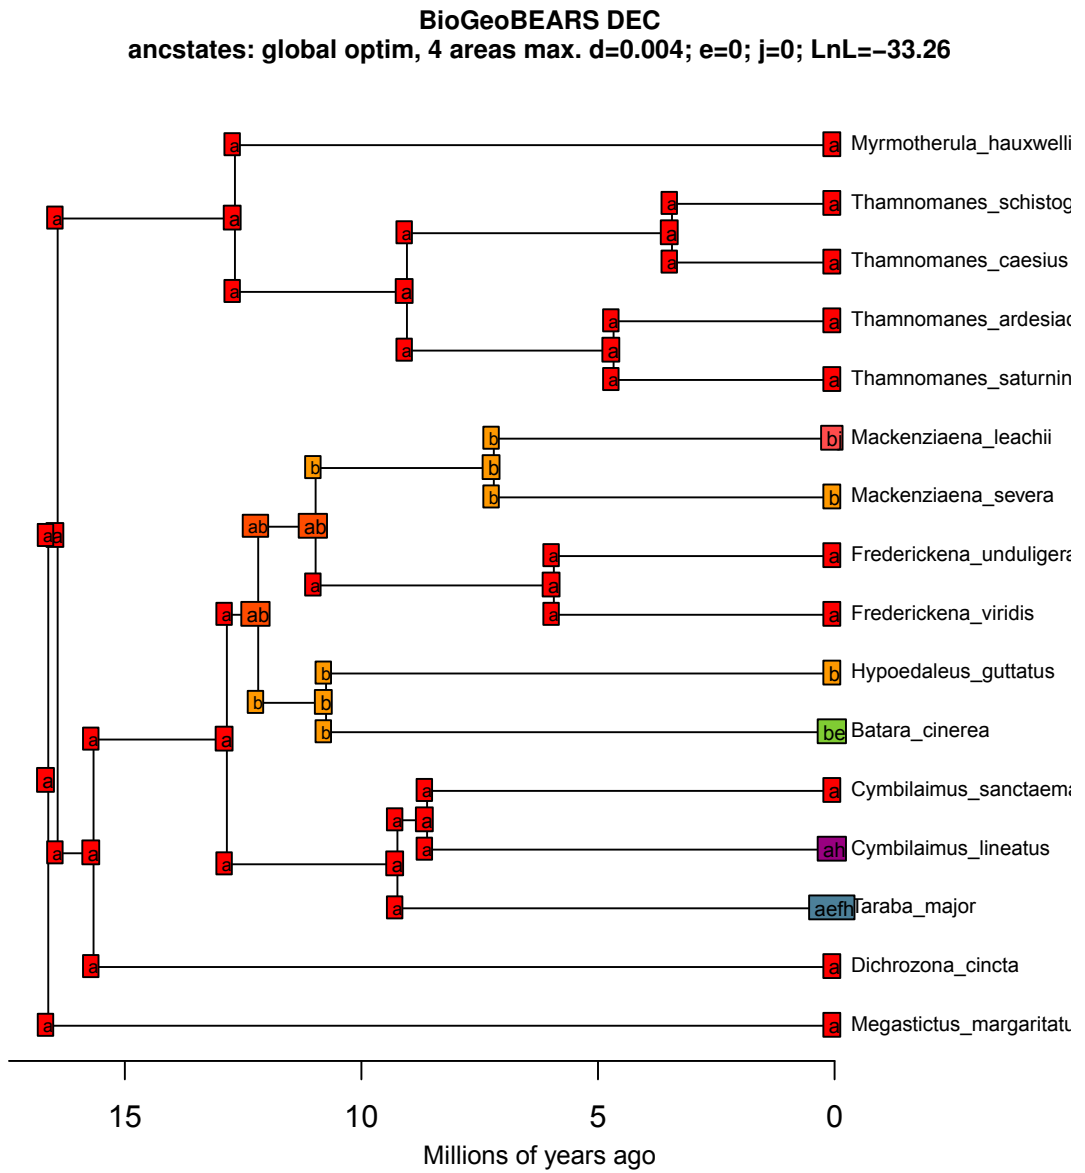

Figure S5: Clades of birds

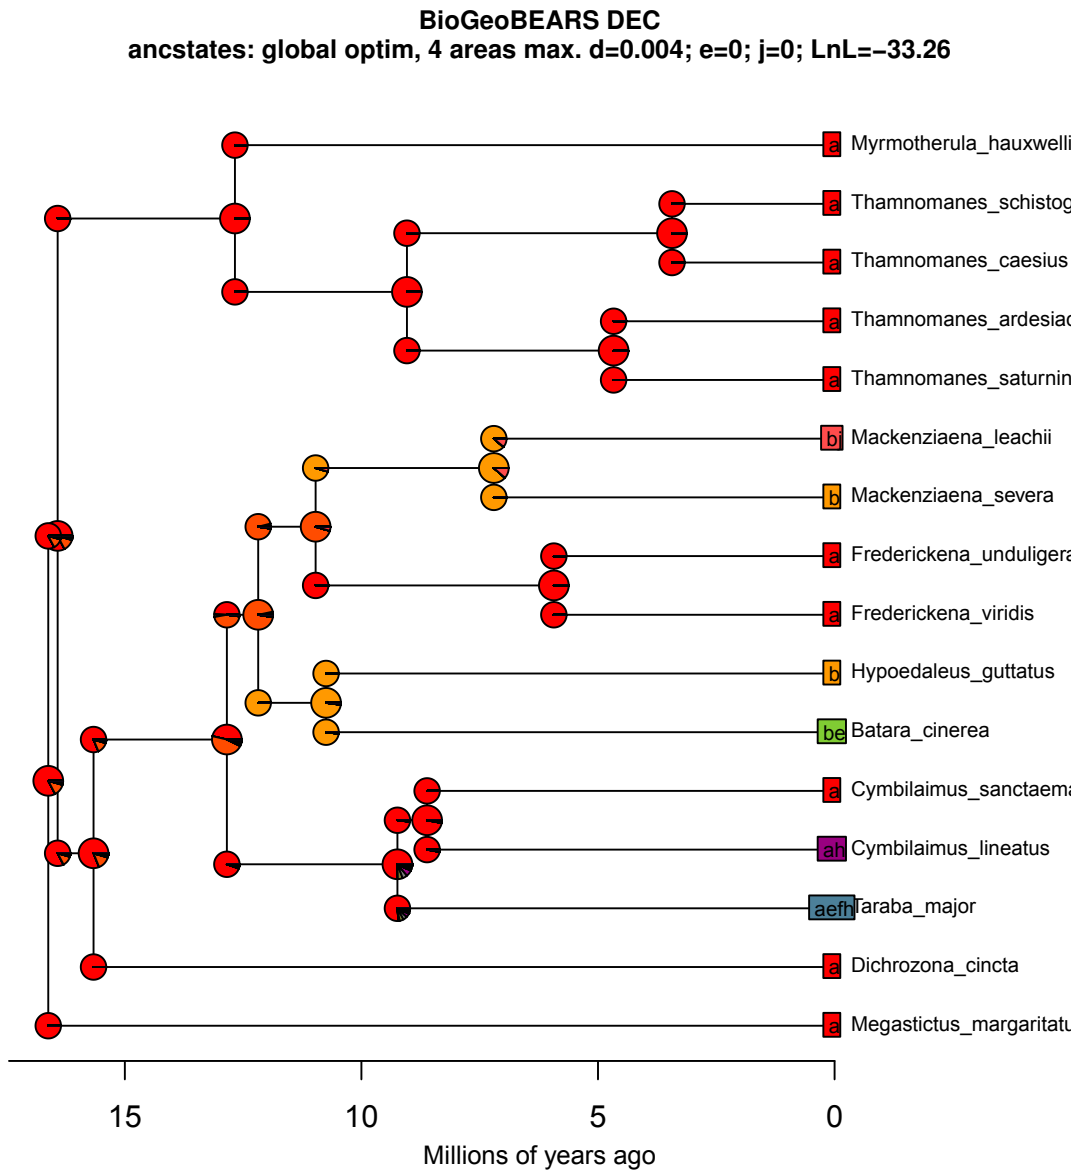

Figure S5: Clades of birds

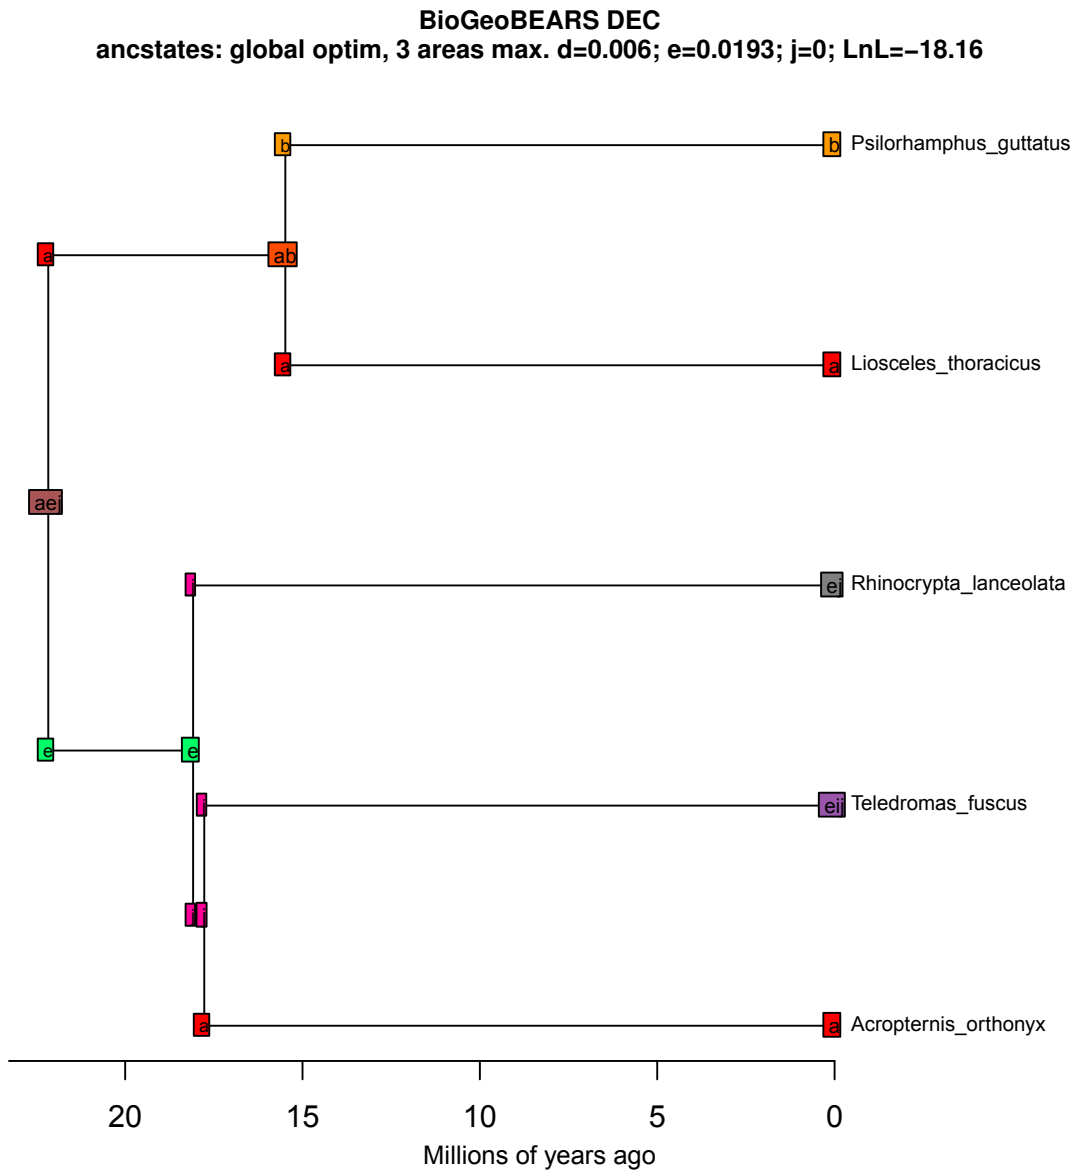

Figure S5: Clades of birds

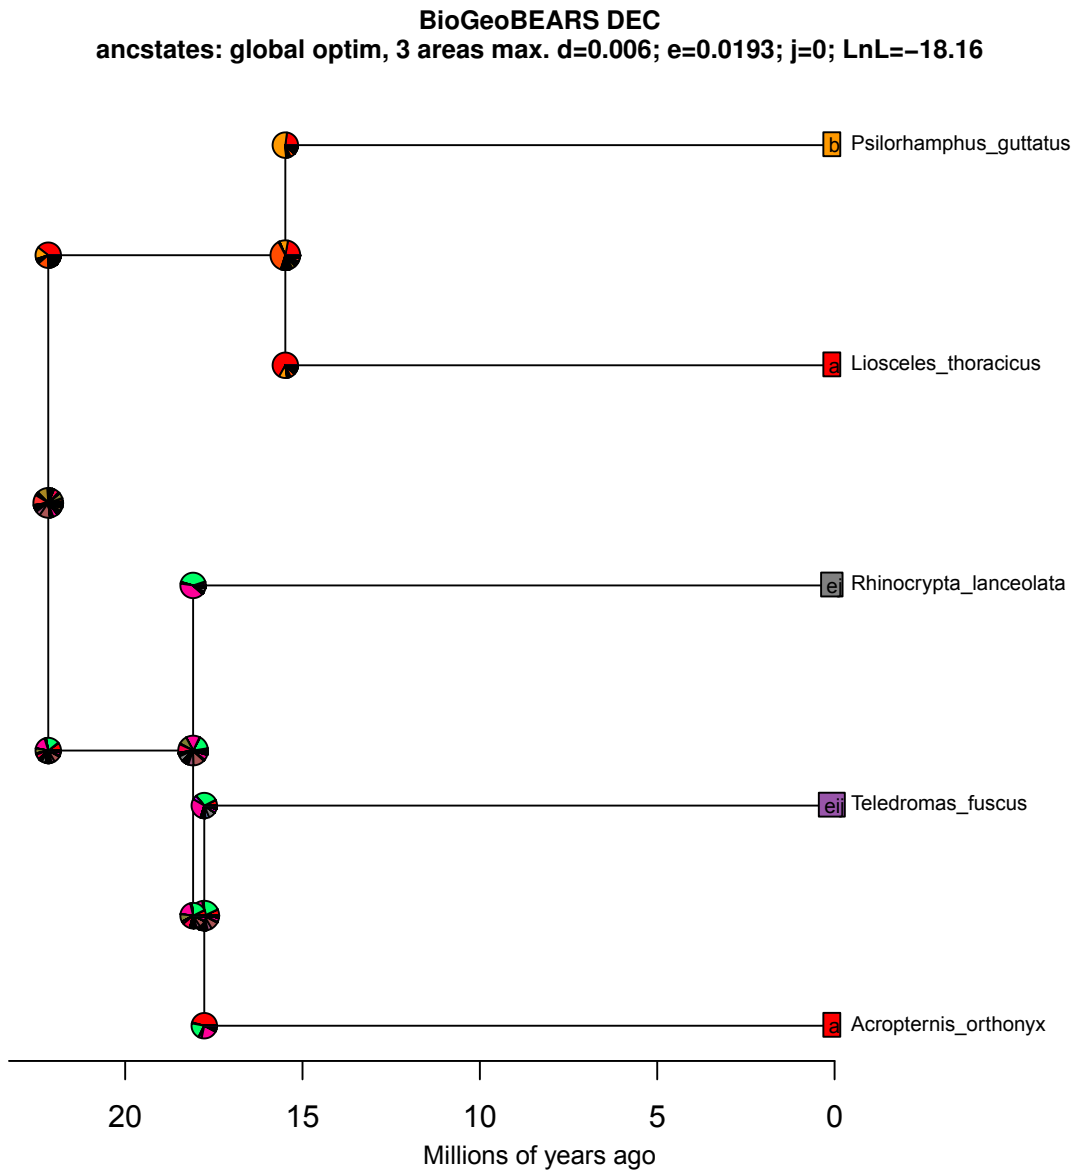

Figure S5: Clades of birds

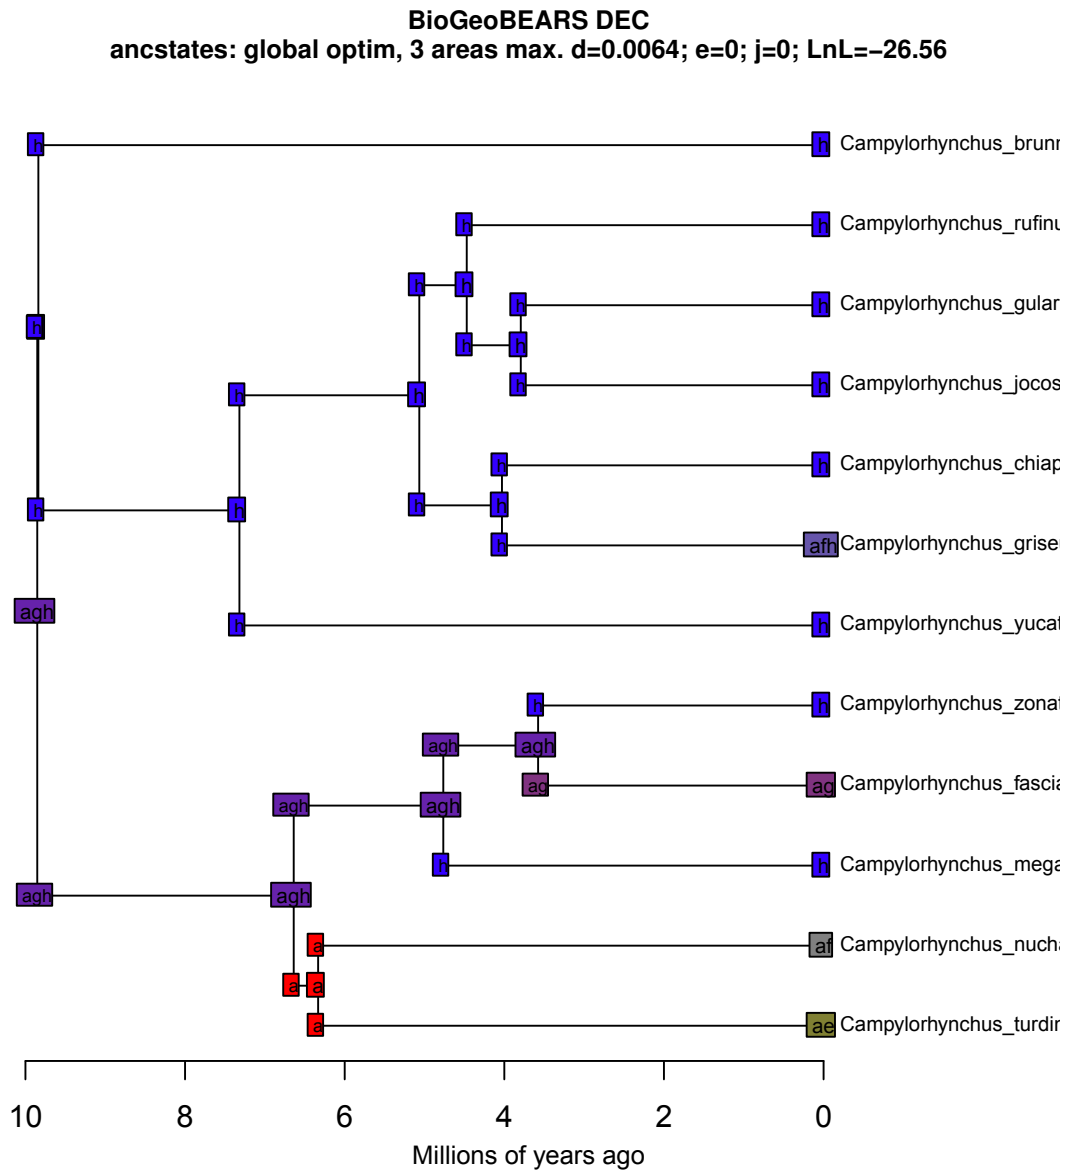

Figure S5: Clades of birds

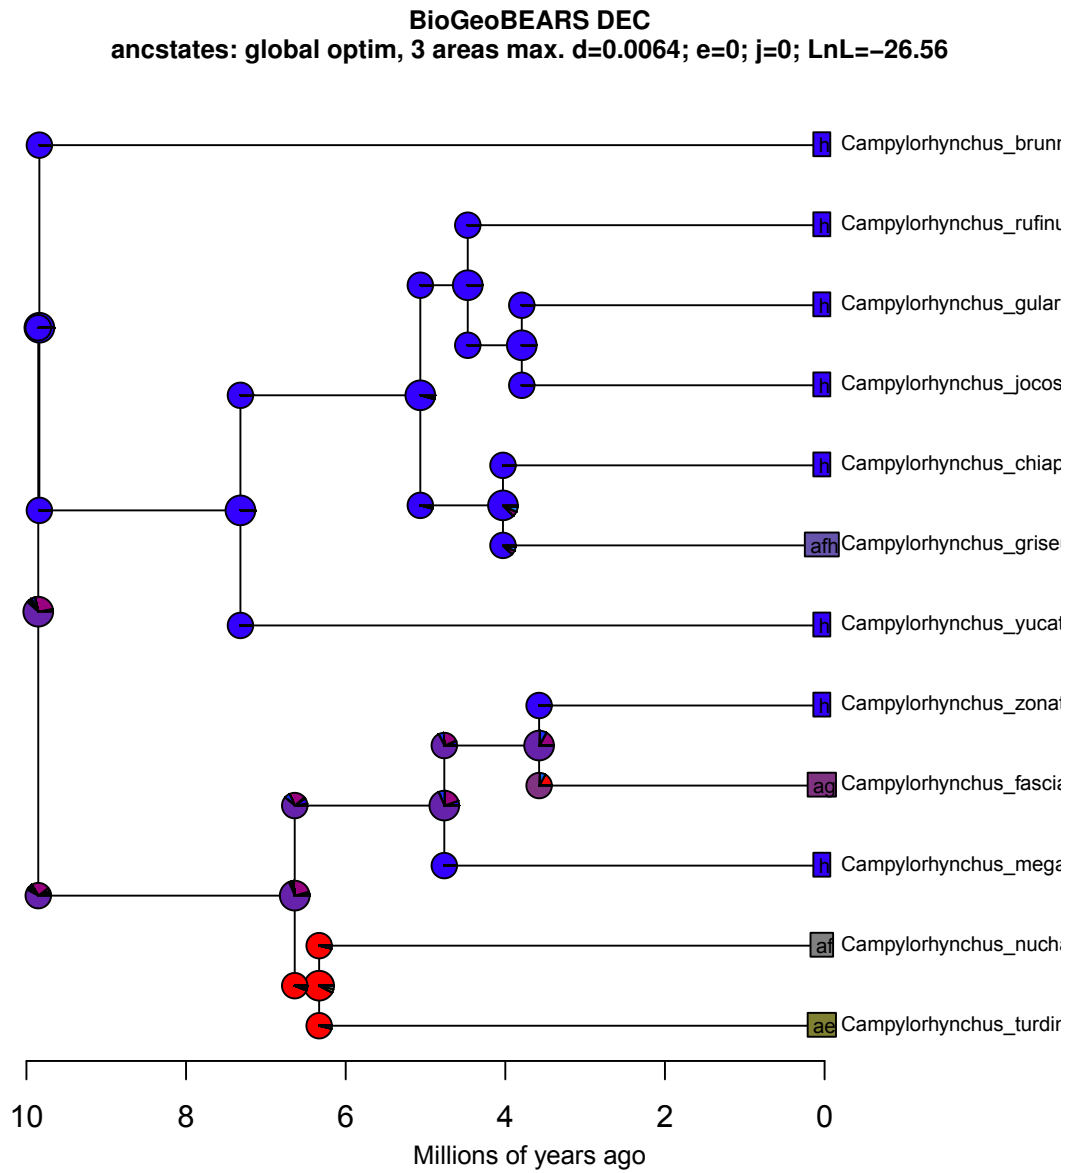

Figure S5: Clades of birds

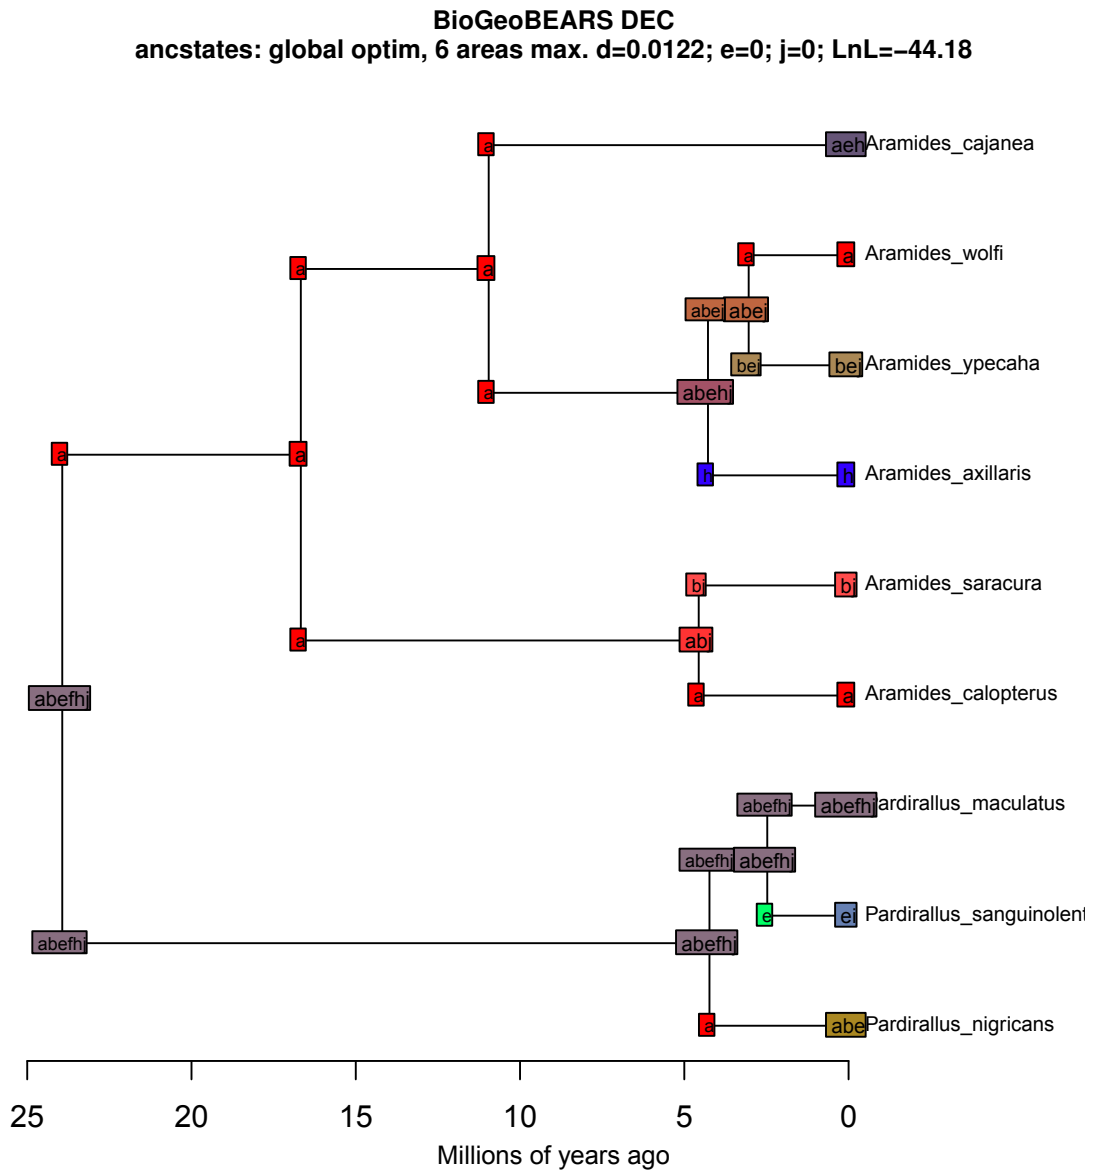



Figure S5: Clades of birds

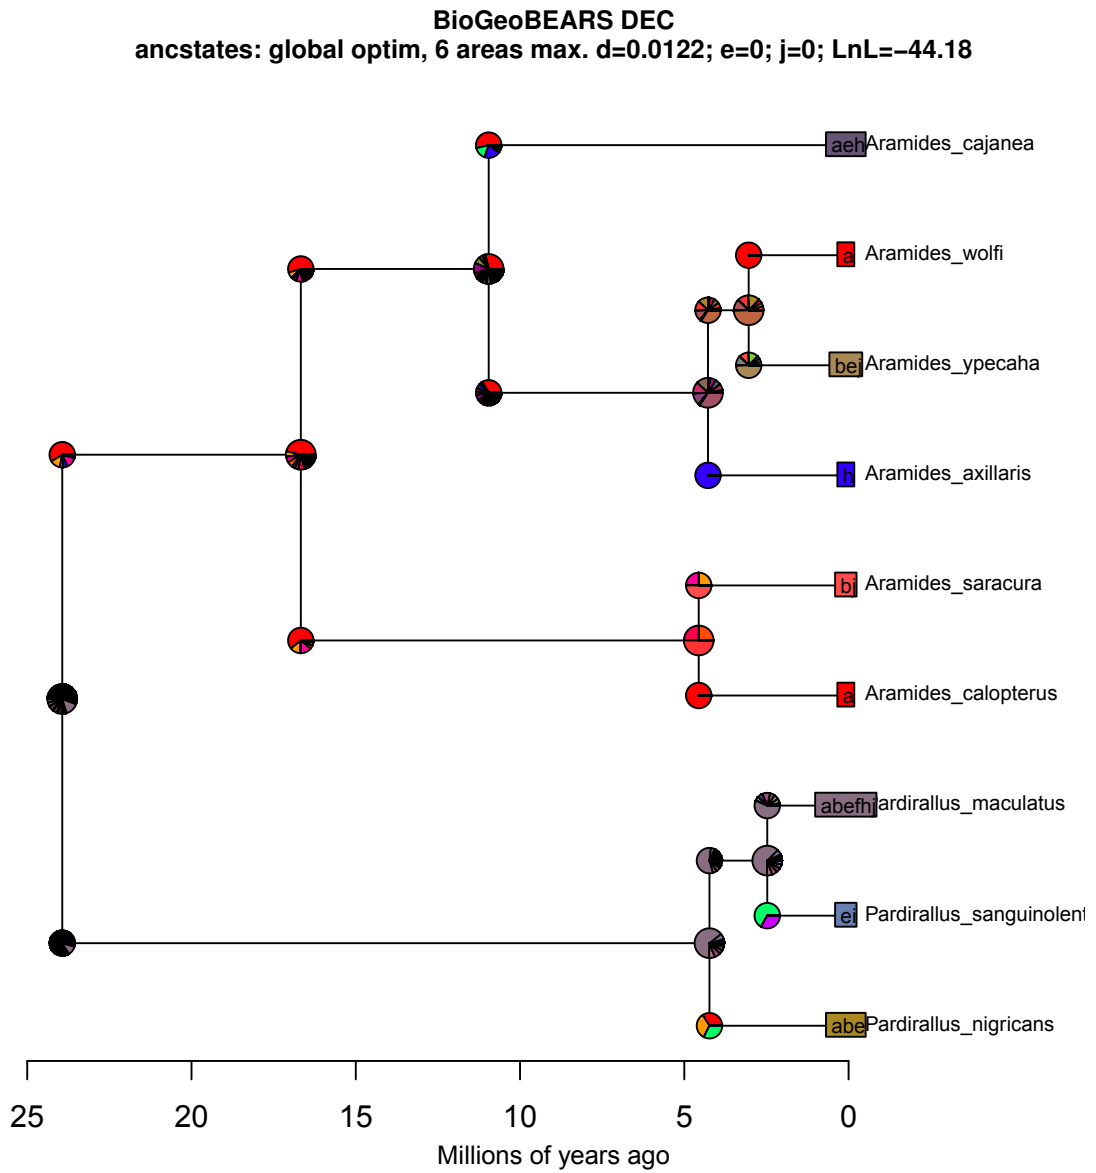

Figure S5: Clades of birds

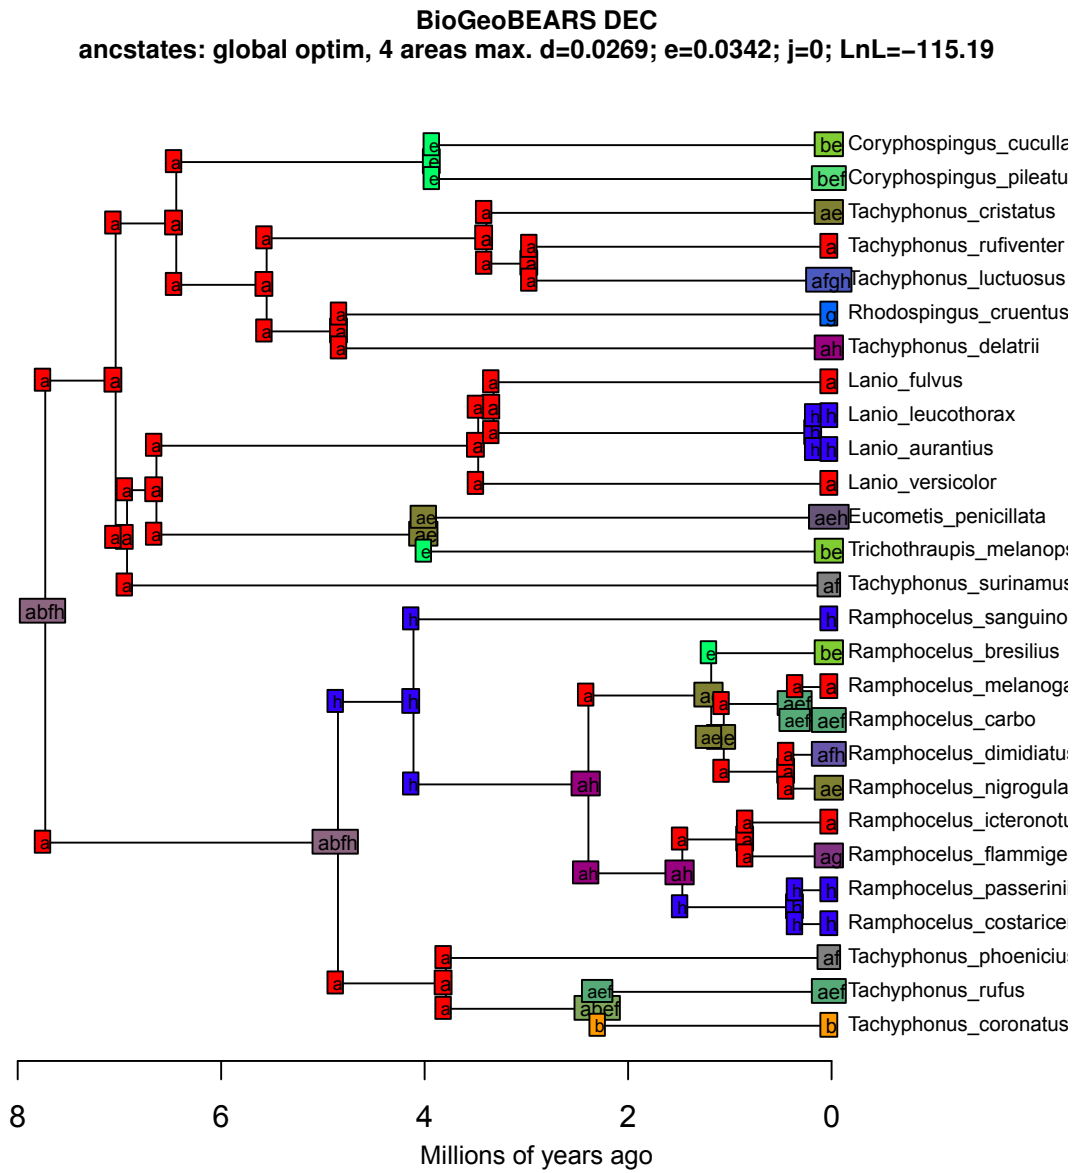

Figure S5: Clades of birds

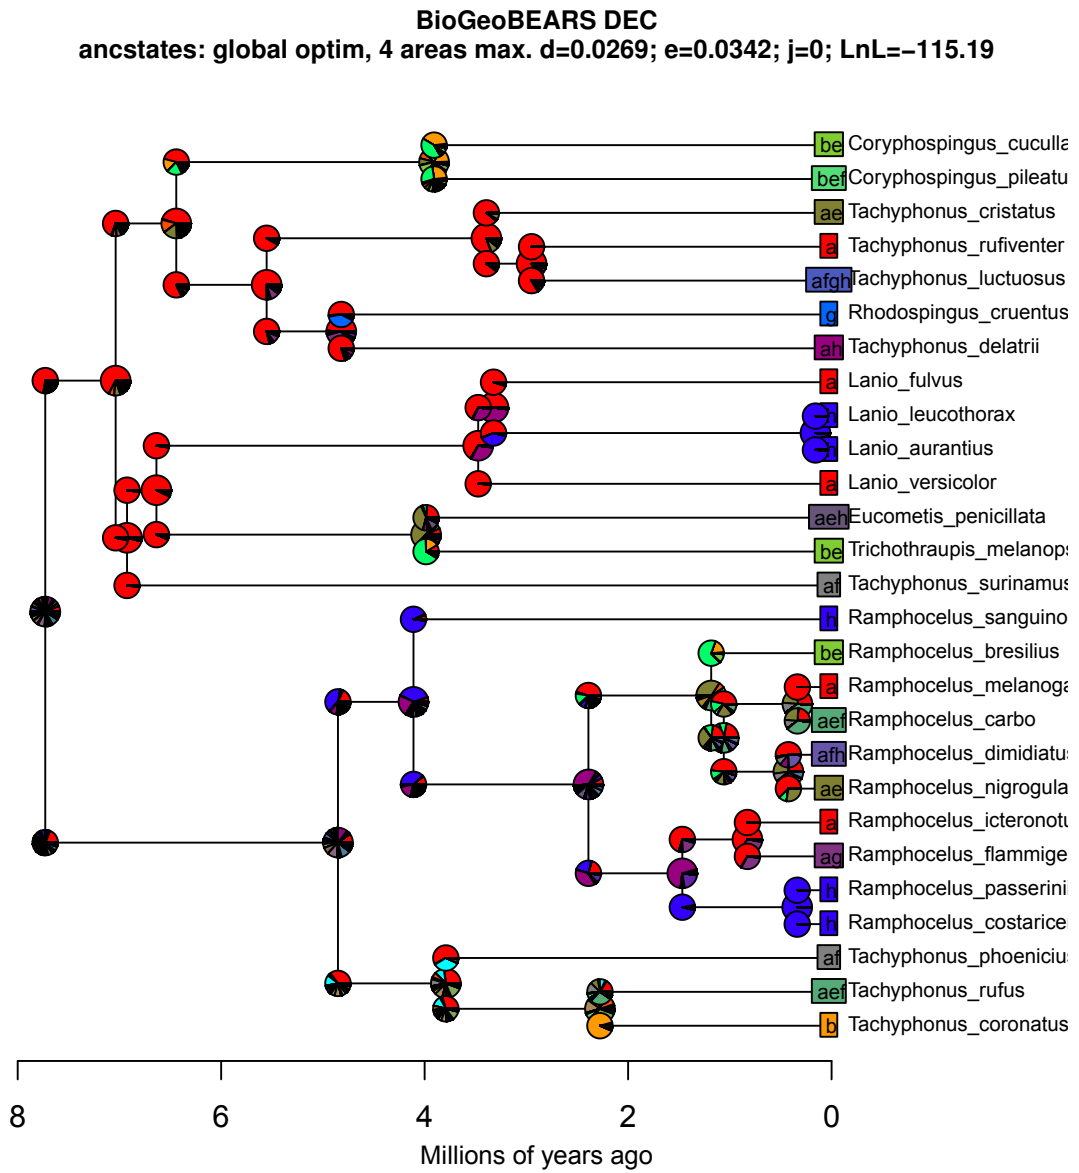

Figure S5: Clades of birds

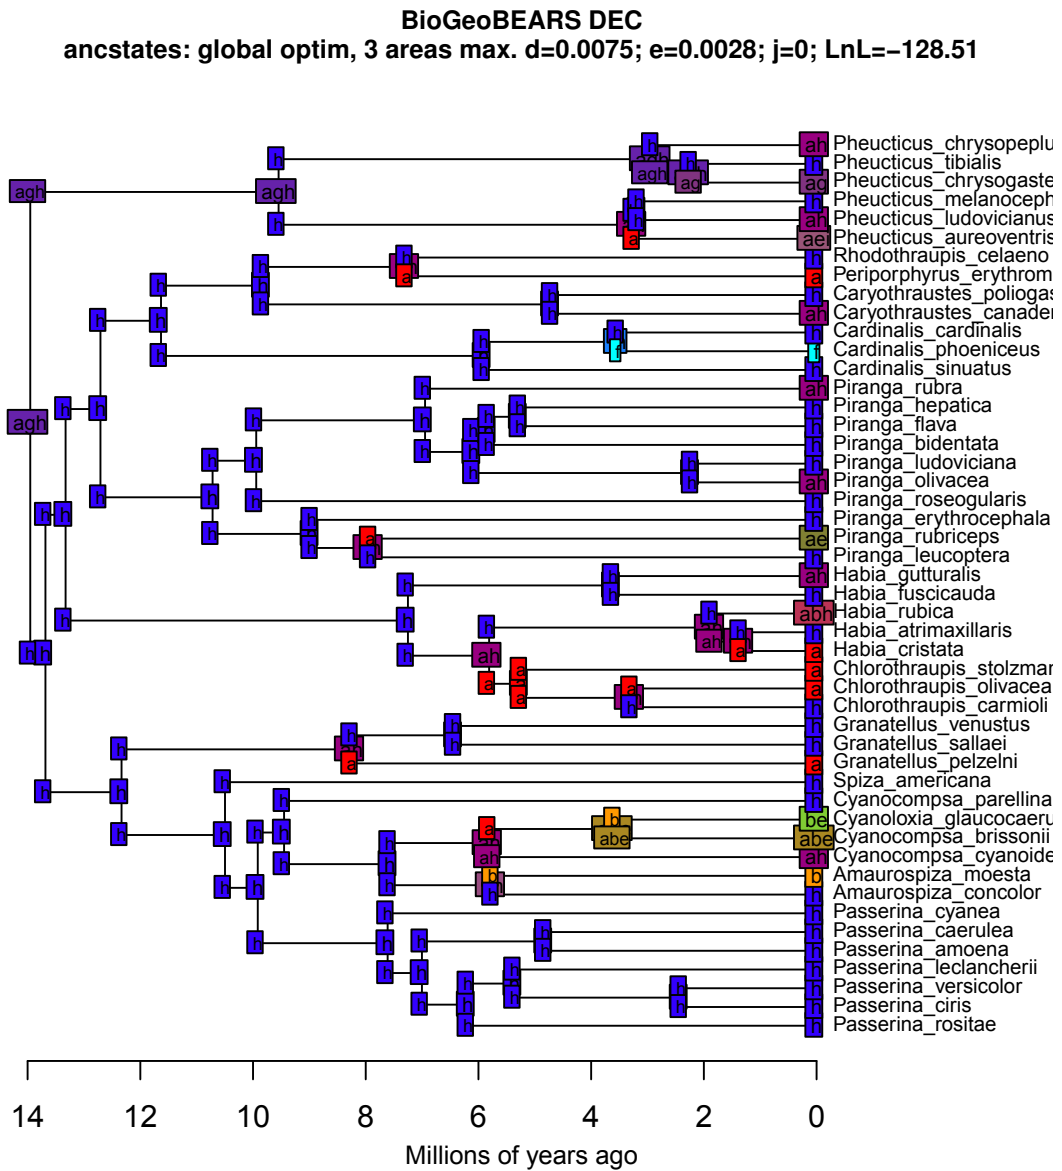

Figure S5: Clades of birds

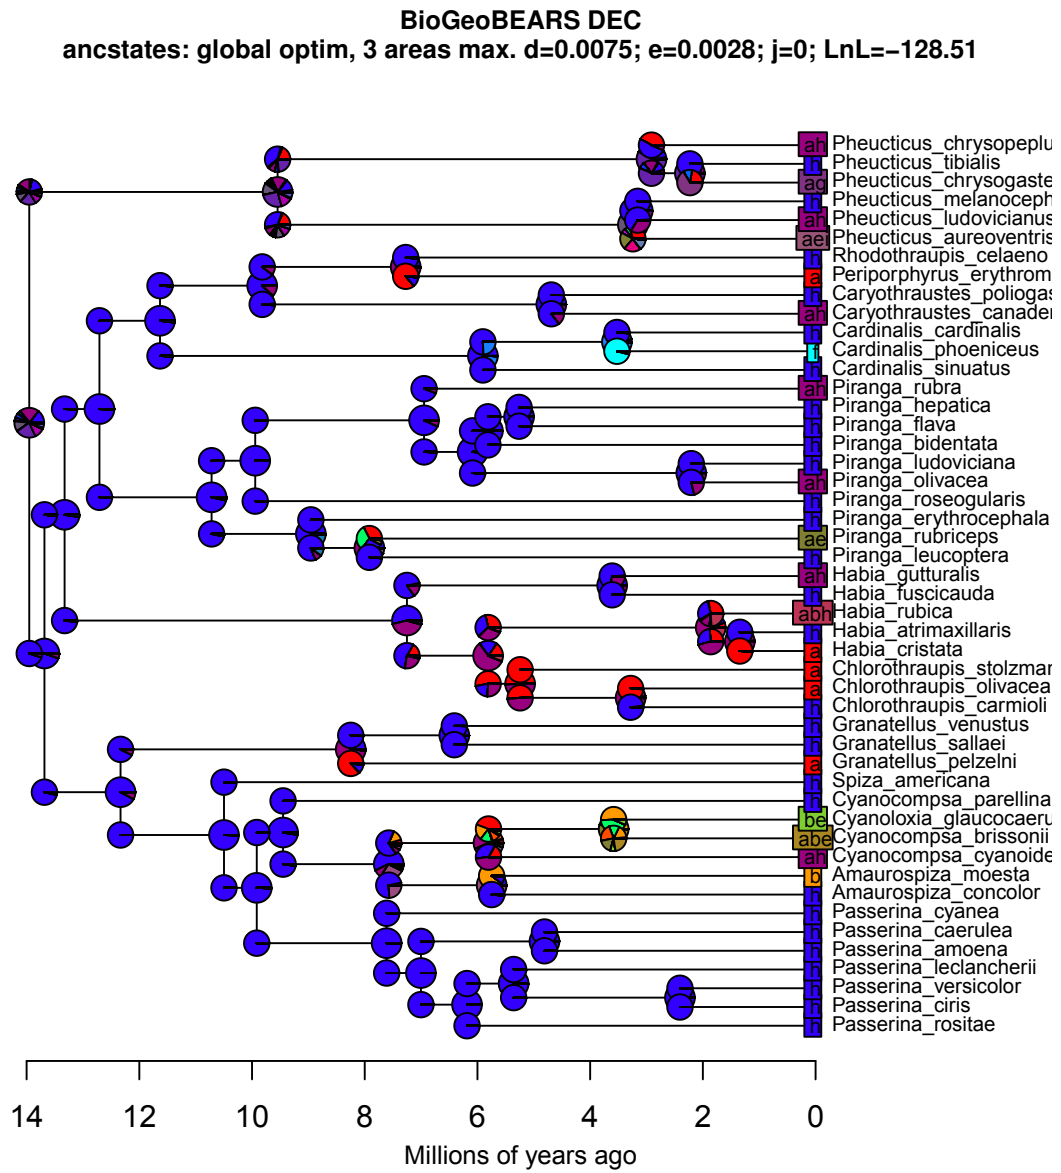

Figure S5: Clades of birds

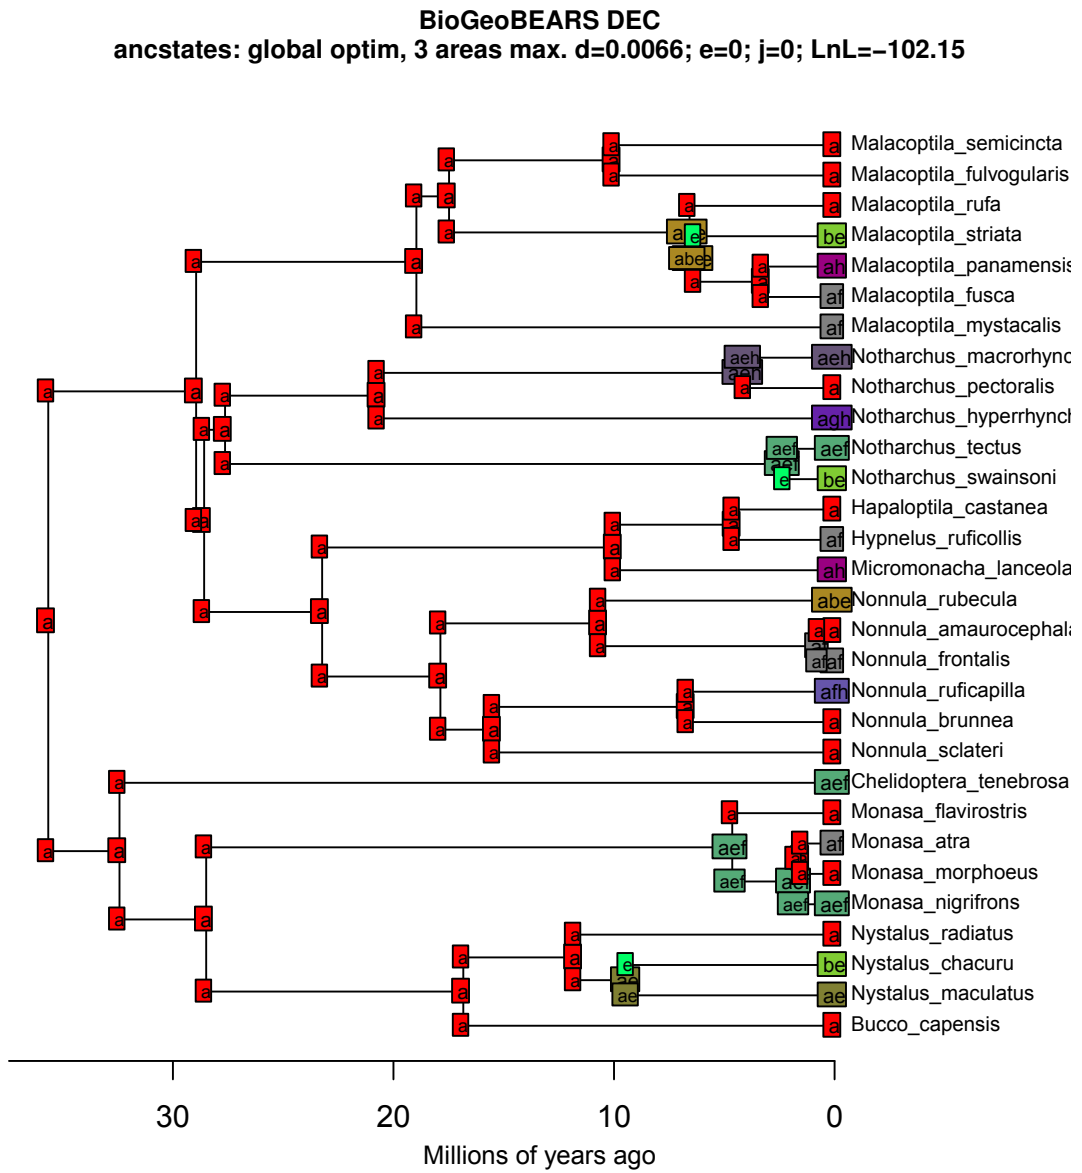

Figure S5: Clades of birds

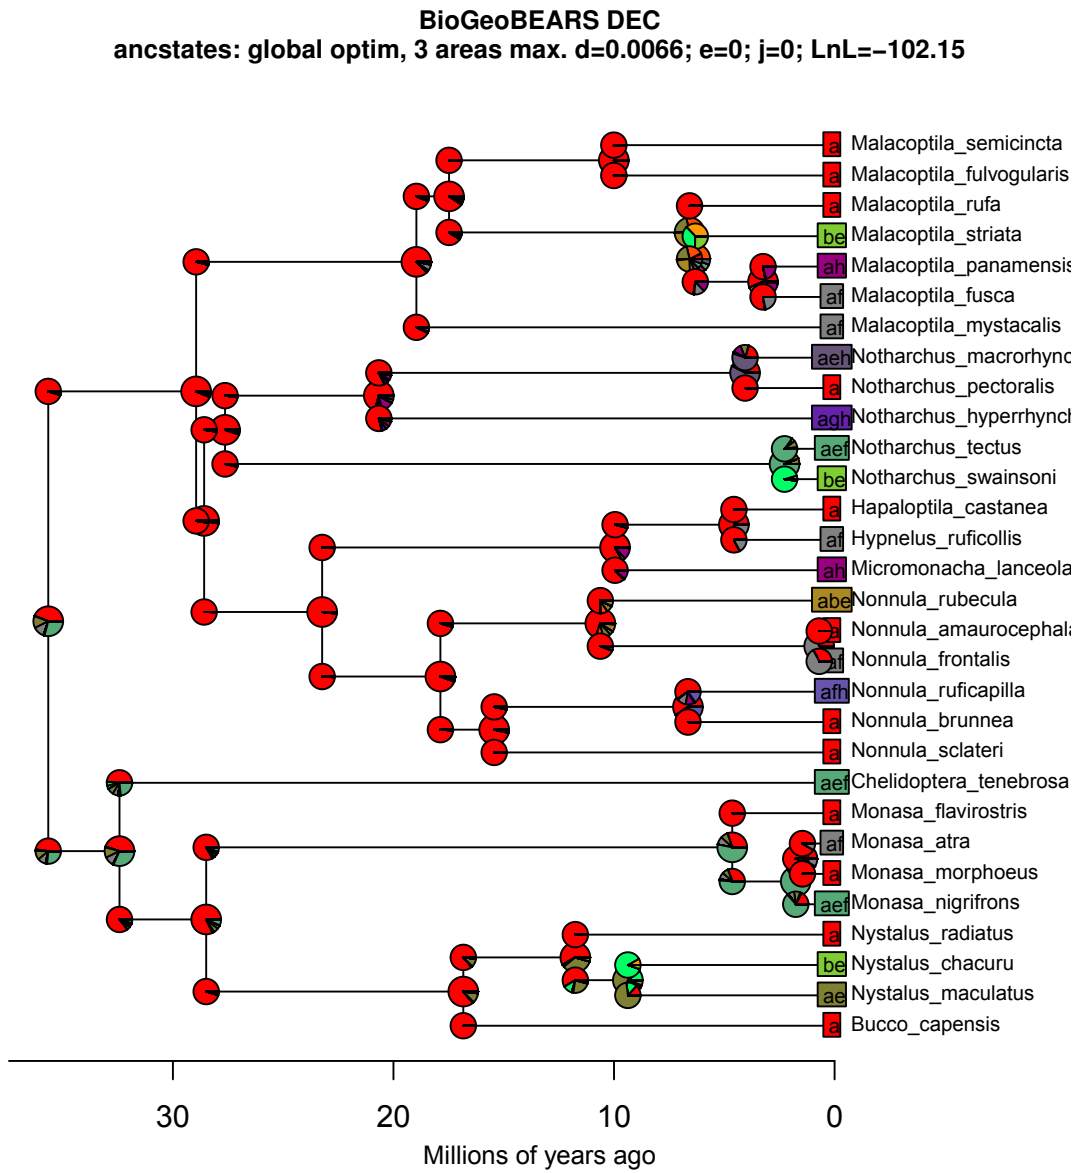

Figure S5: Clades of birds

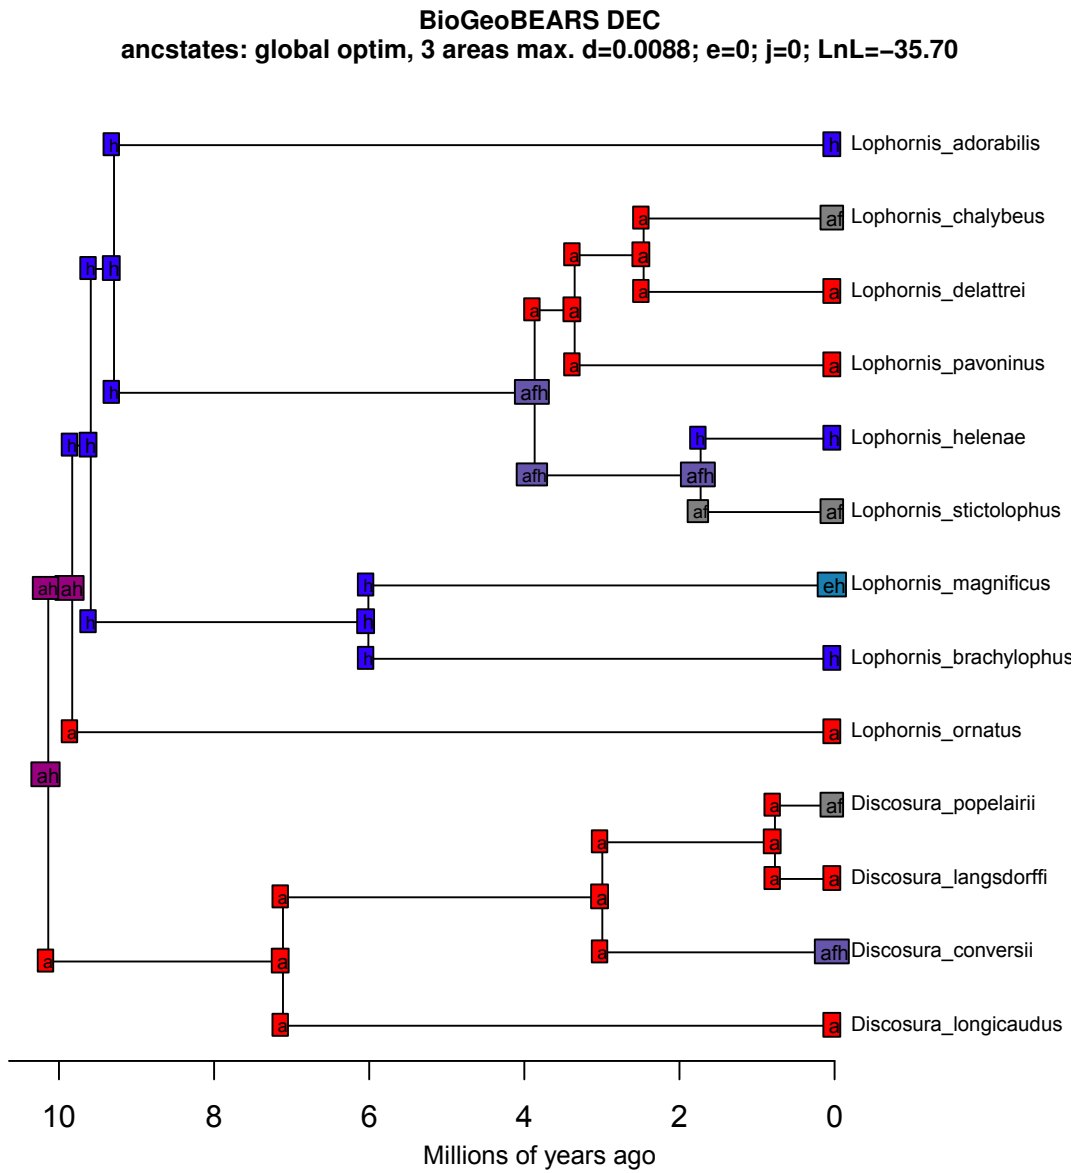



Figure S5: Clades of birds

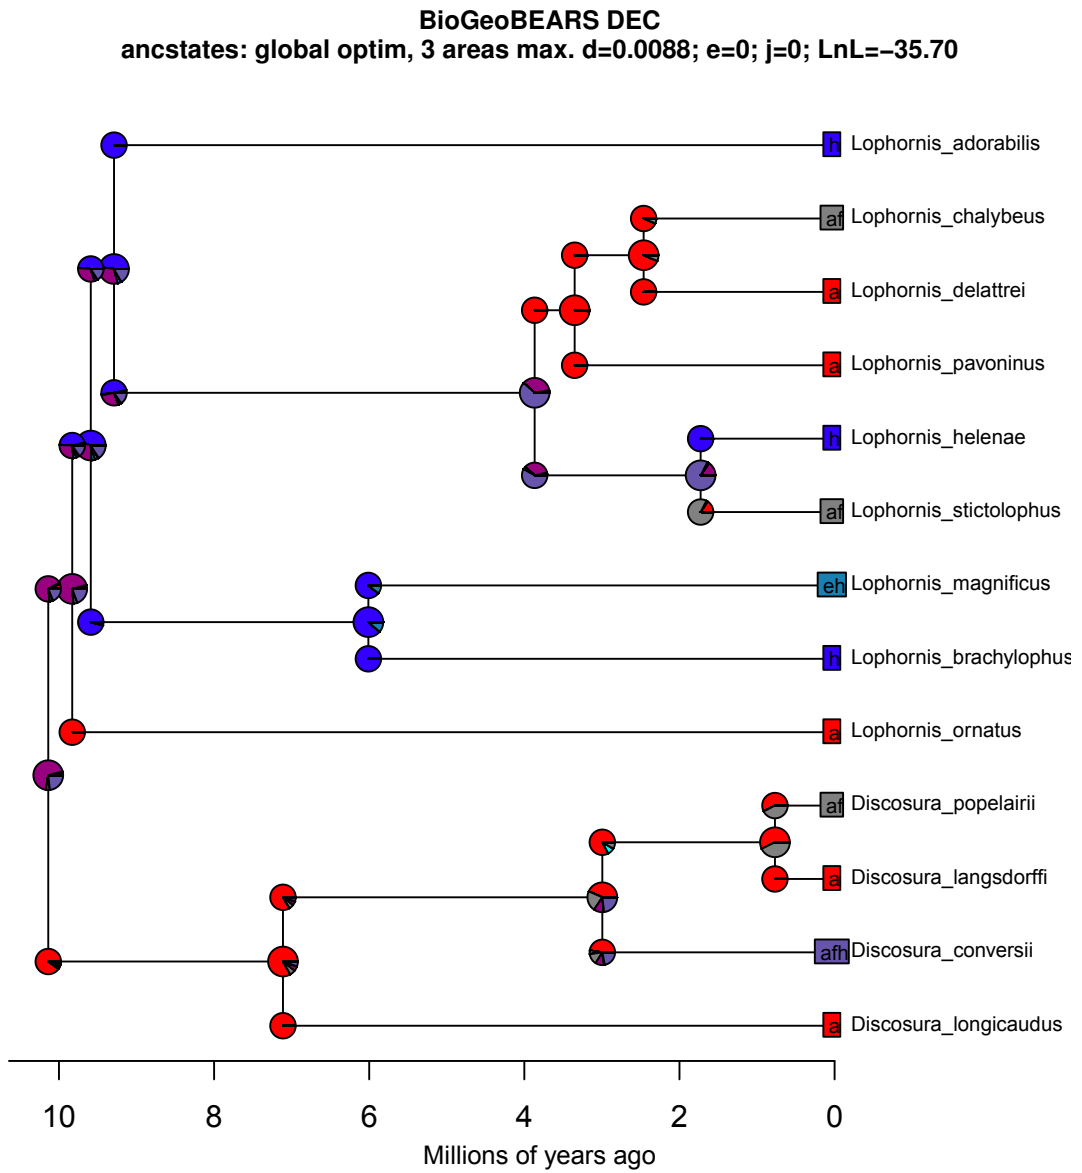



Figure S5: Clades of birds

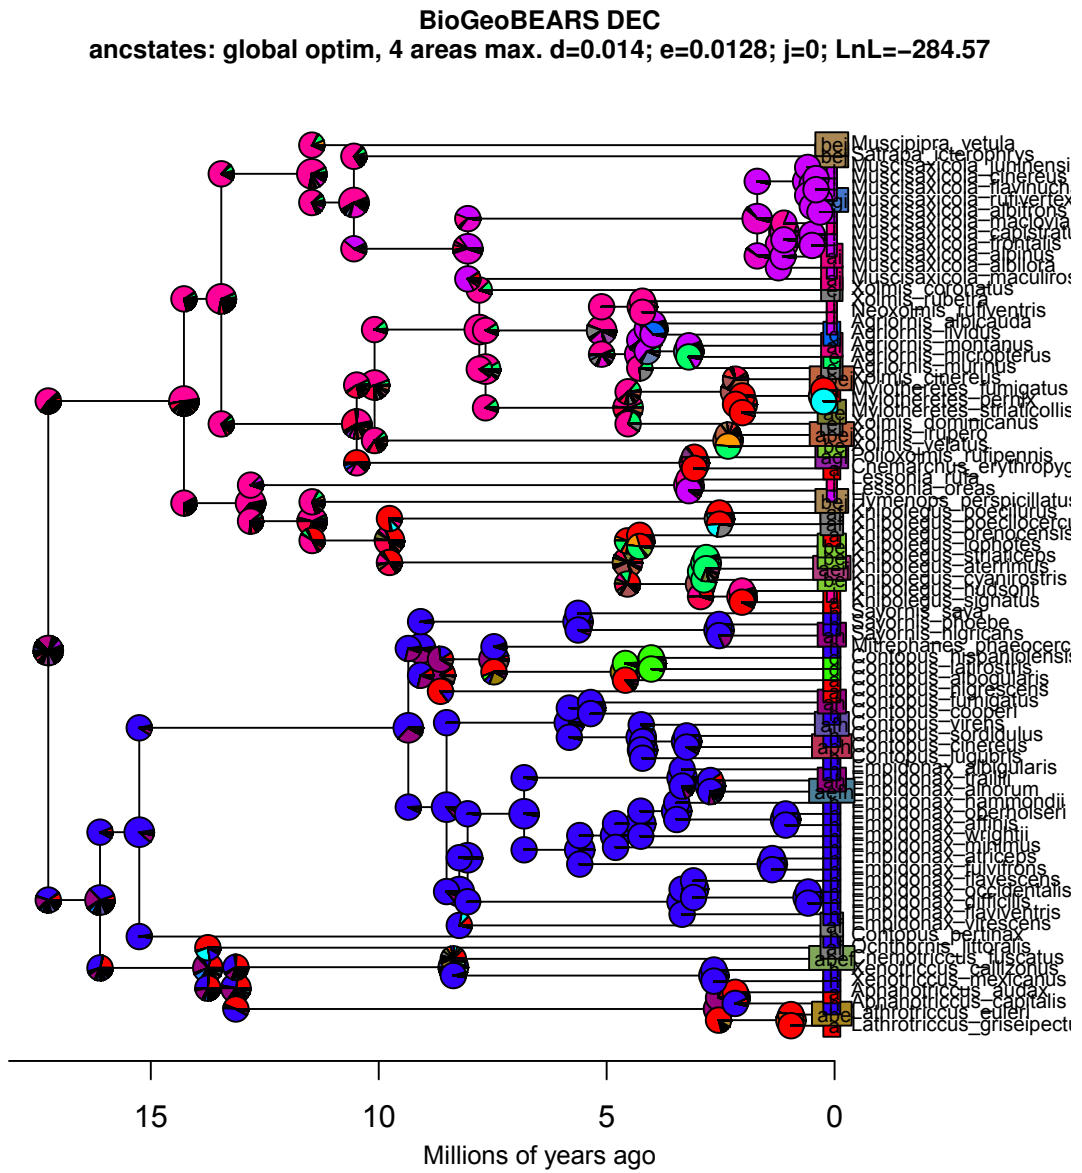

Figure S5: Clades of birds

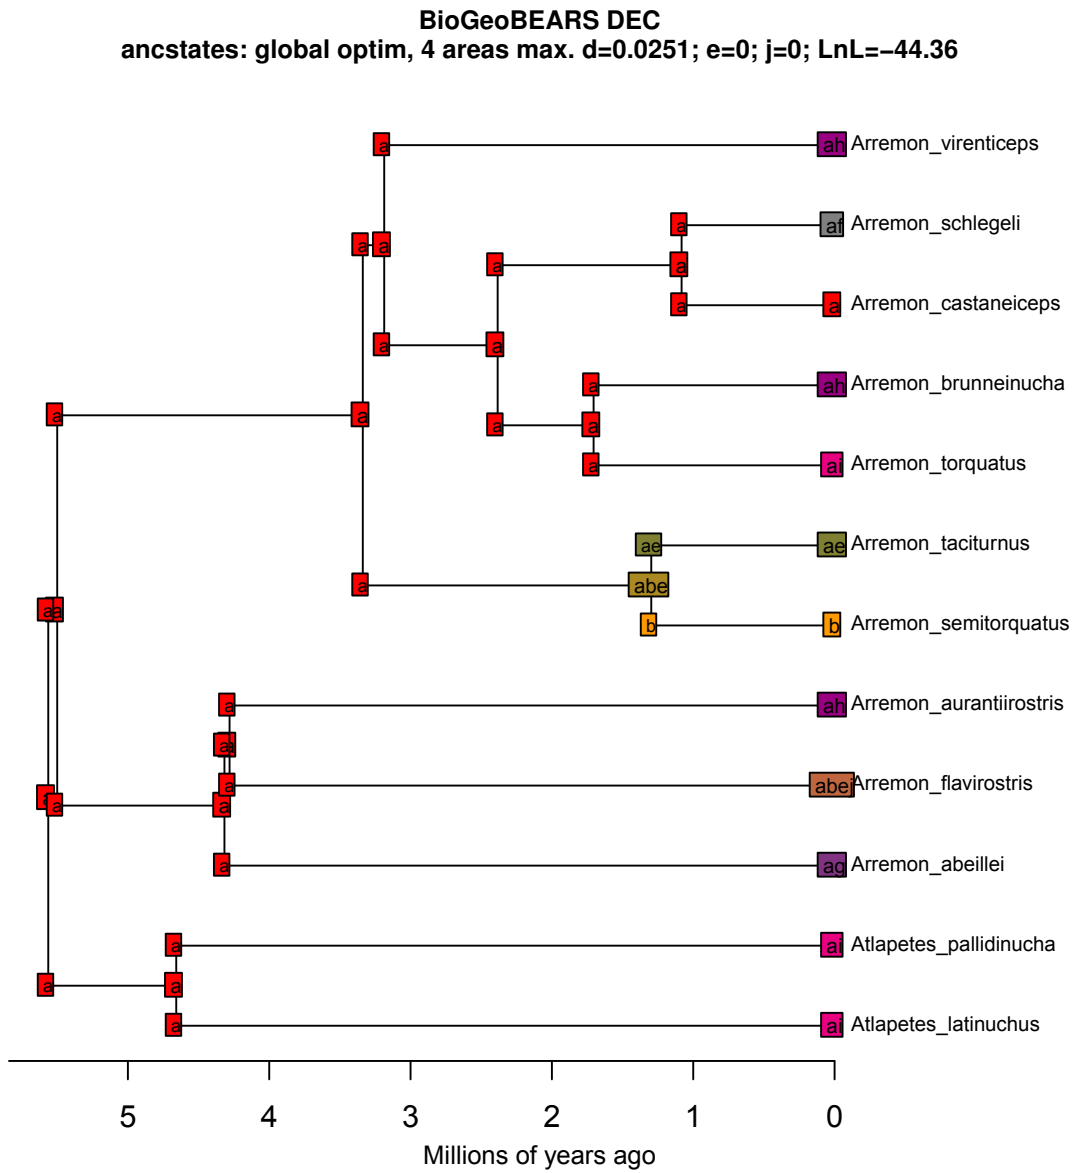

Figure S5: Clades of birds

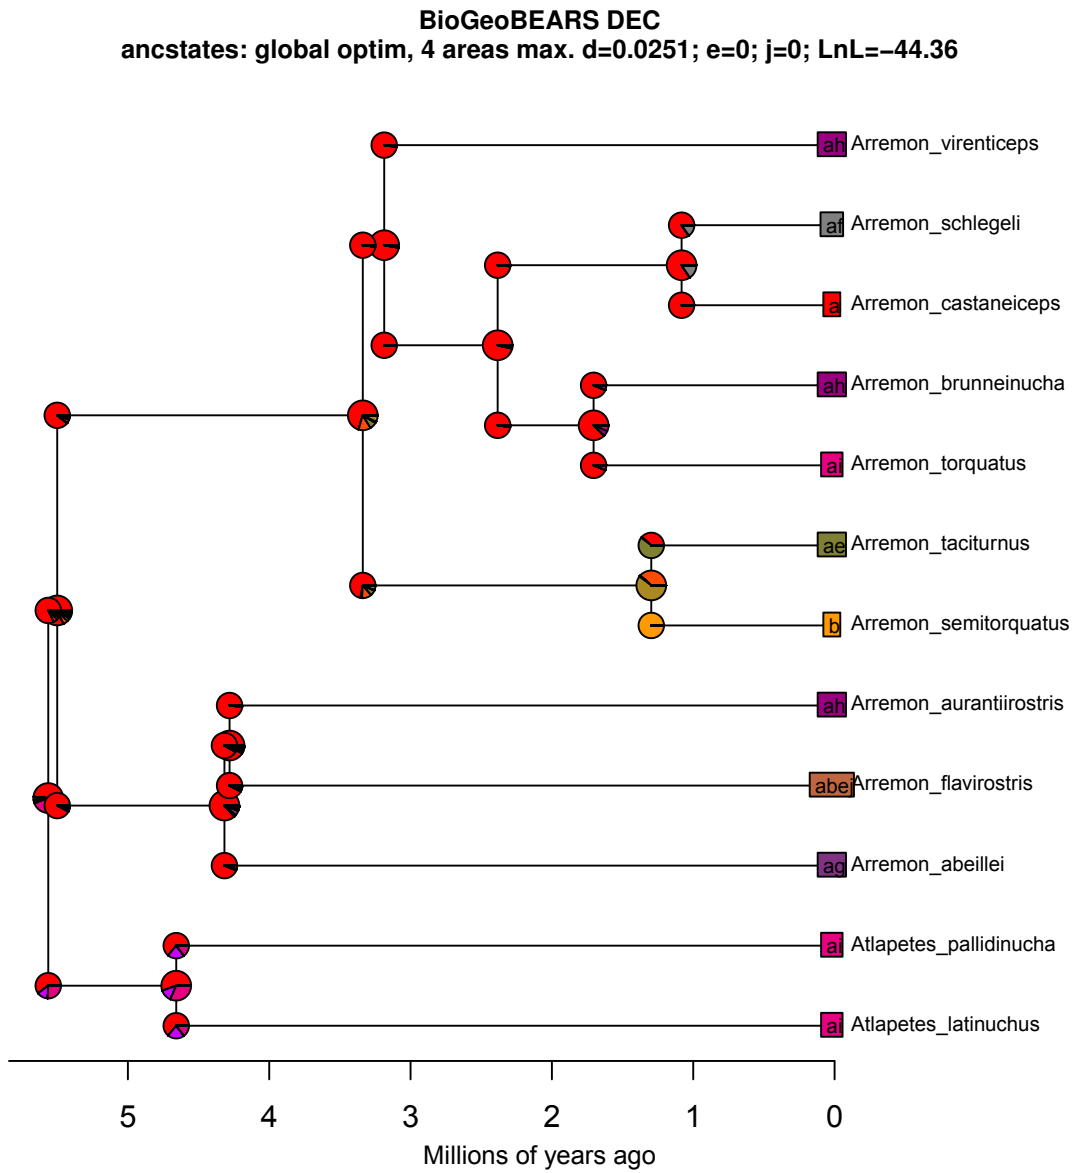

Figure S5: Clades of birds

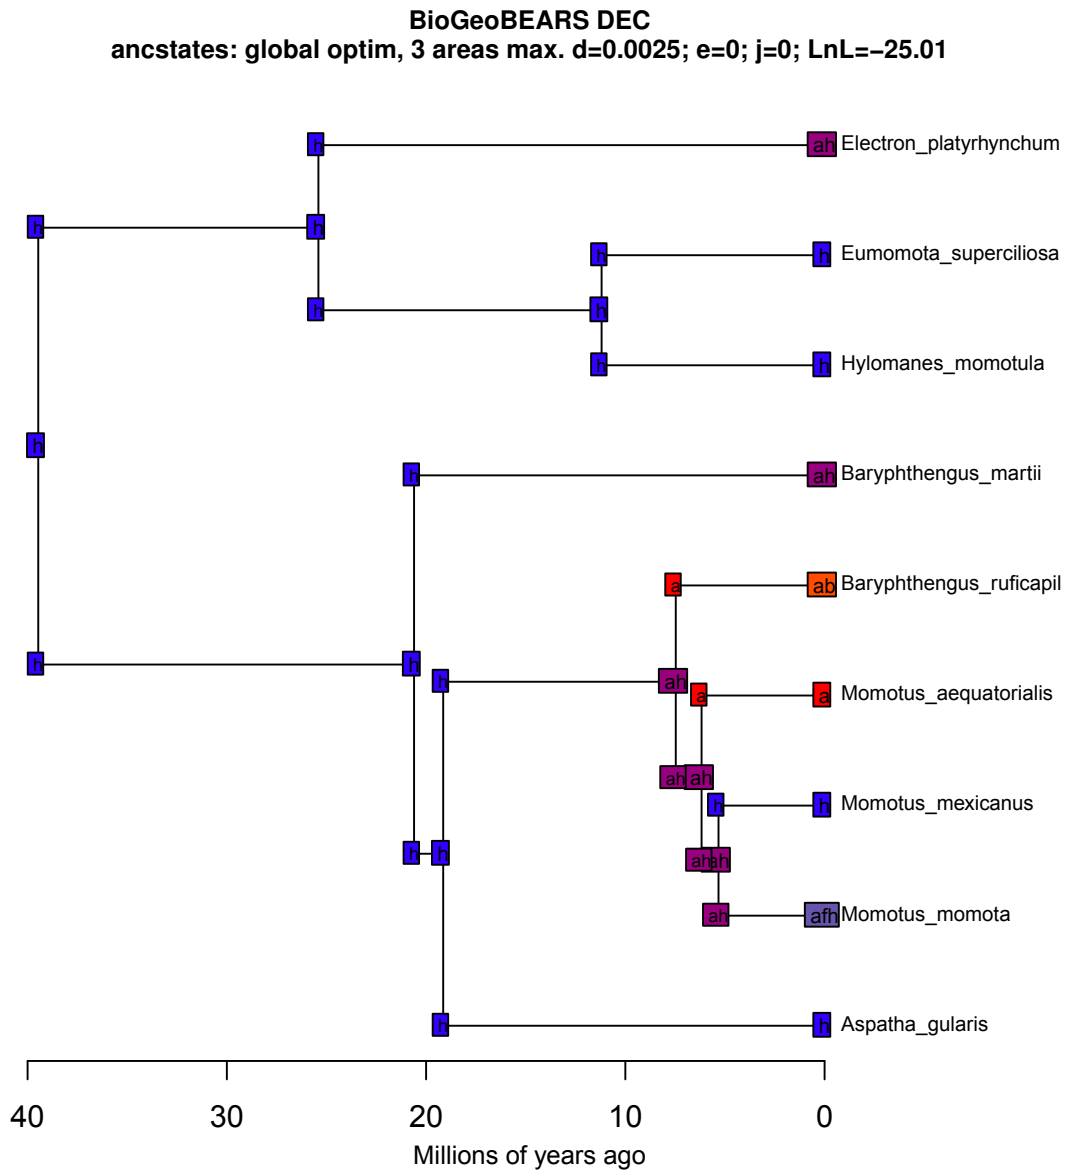

Figure S5: Clades of birds

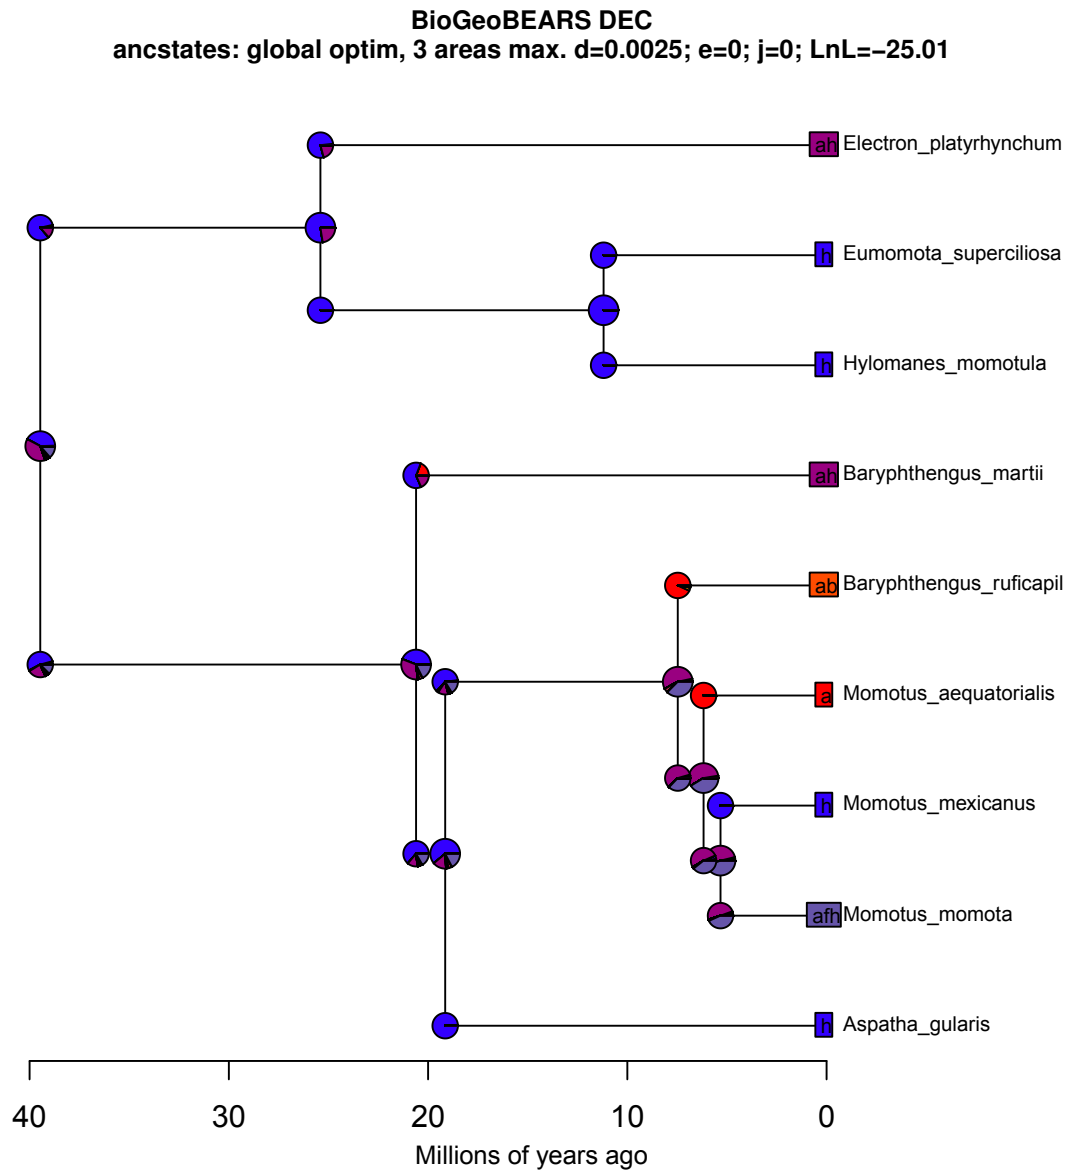

Figure S5: Clades of birds

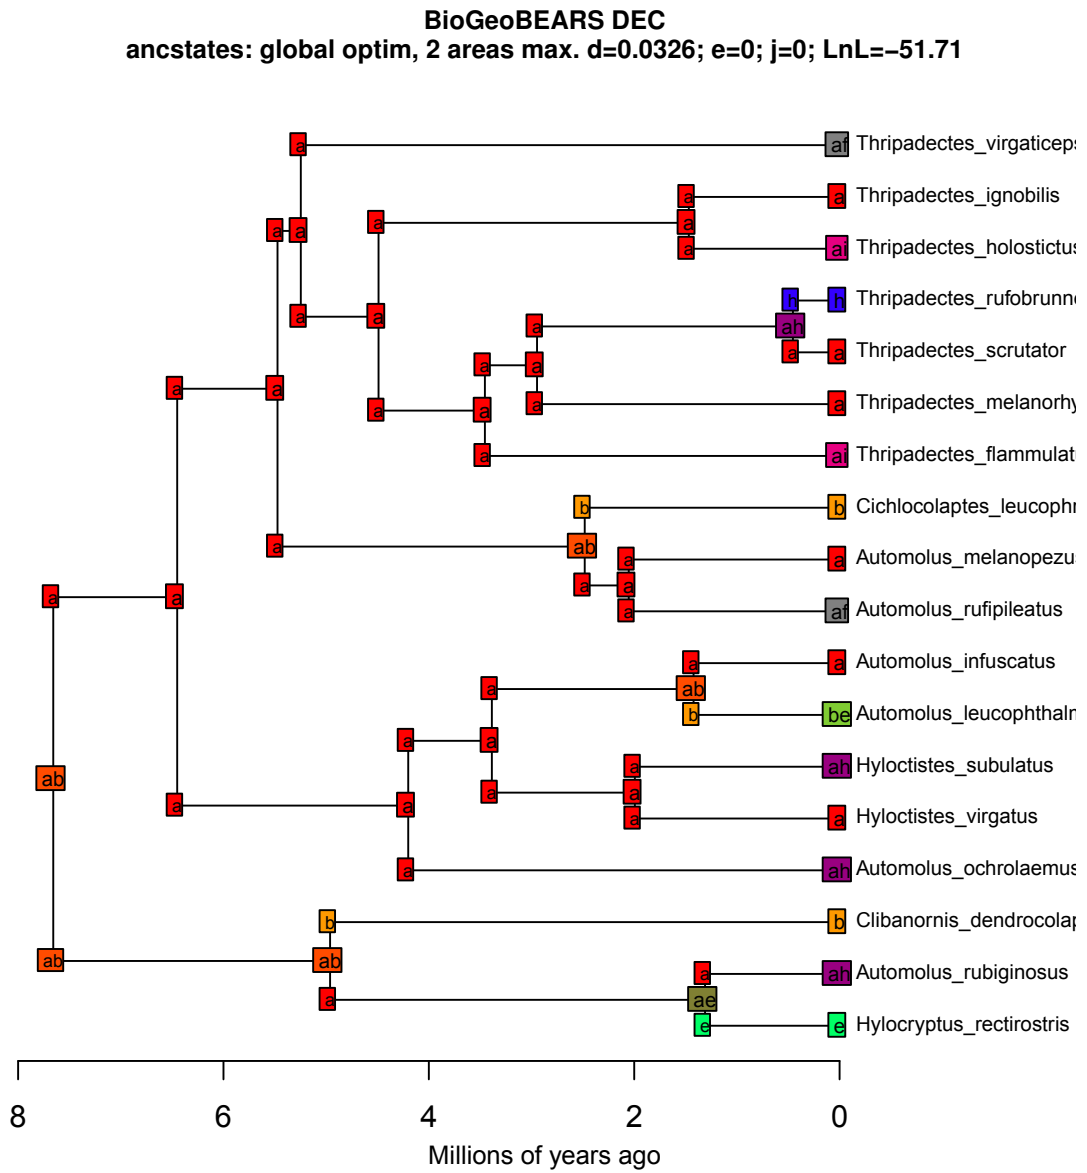



Figure S5: Clades of birds

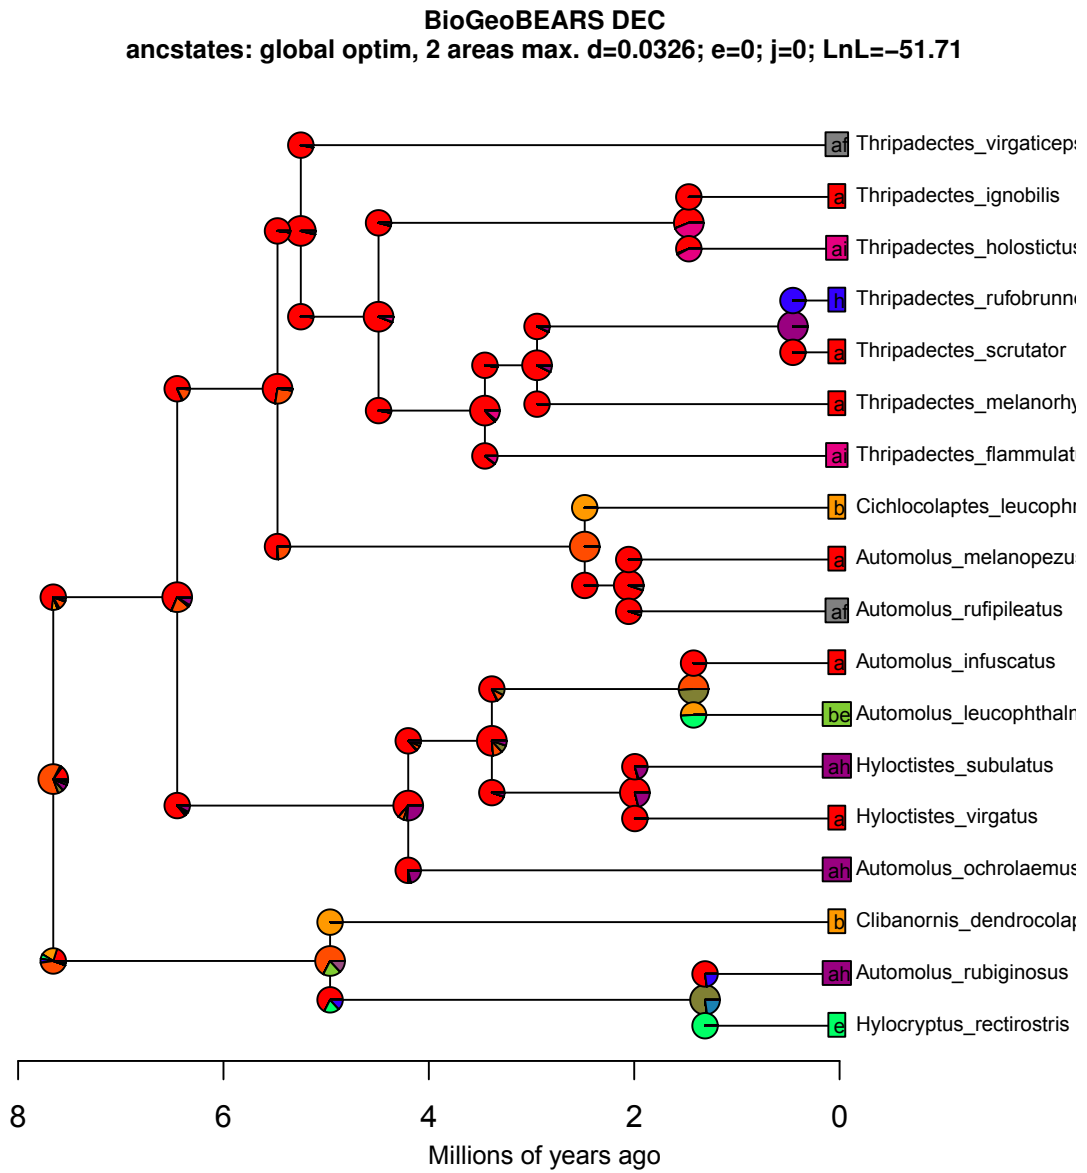

Figure S5: Clades of birds

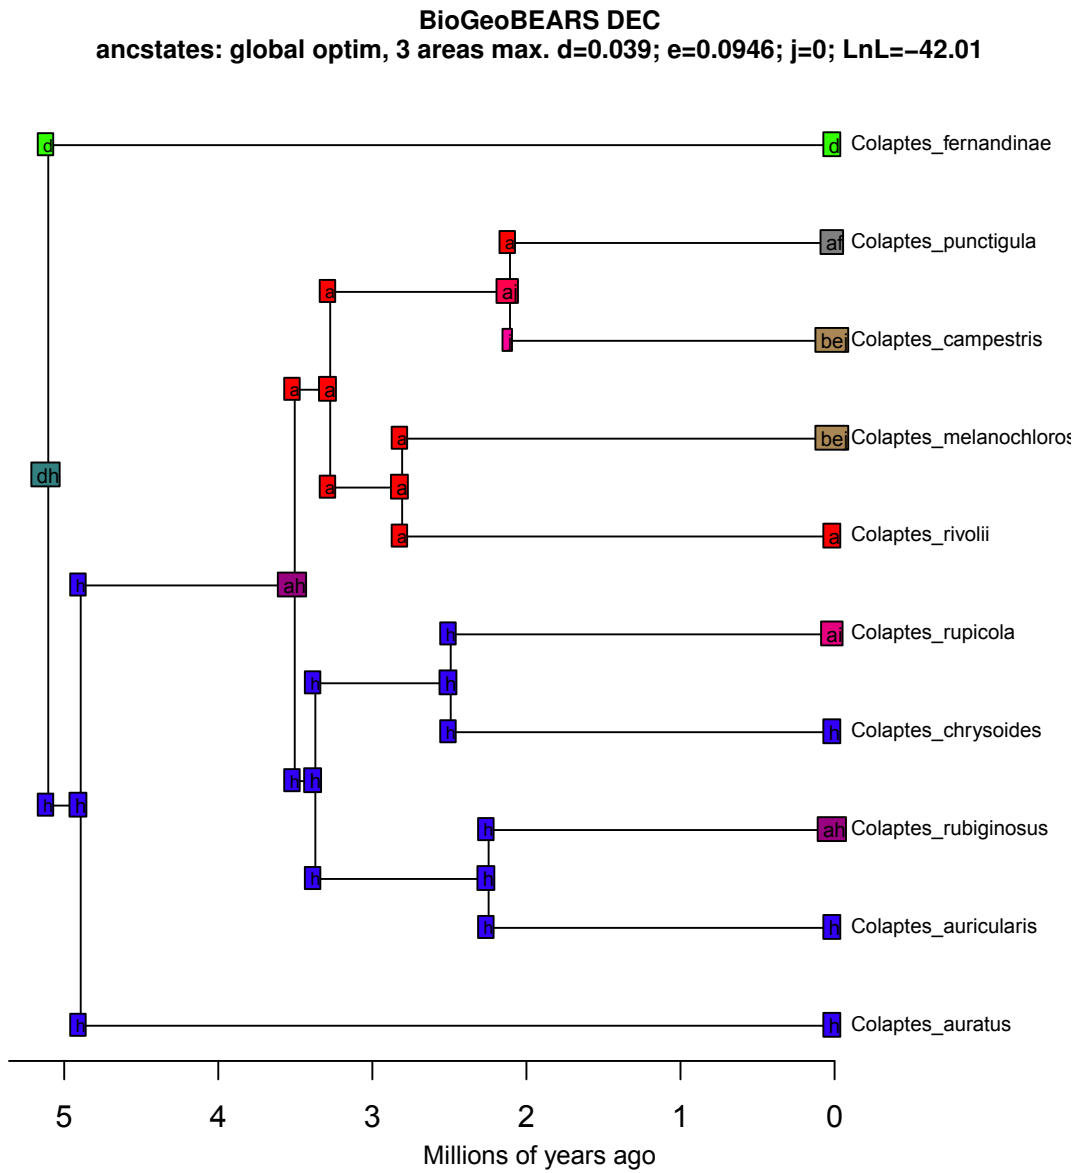

Figure S5: Clades of birds

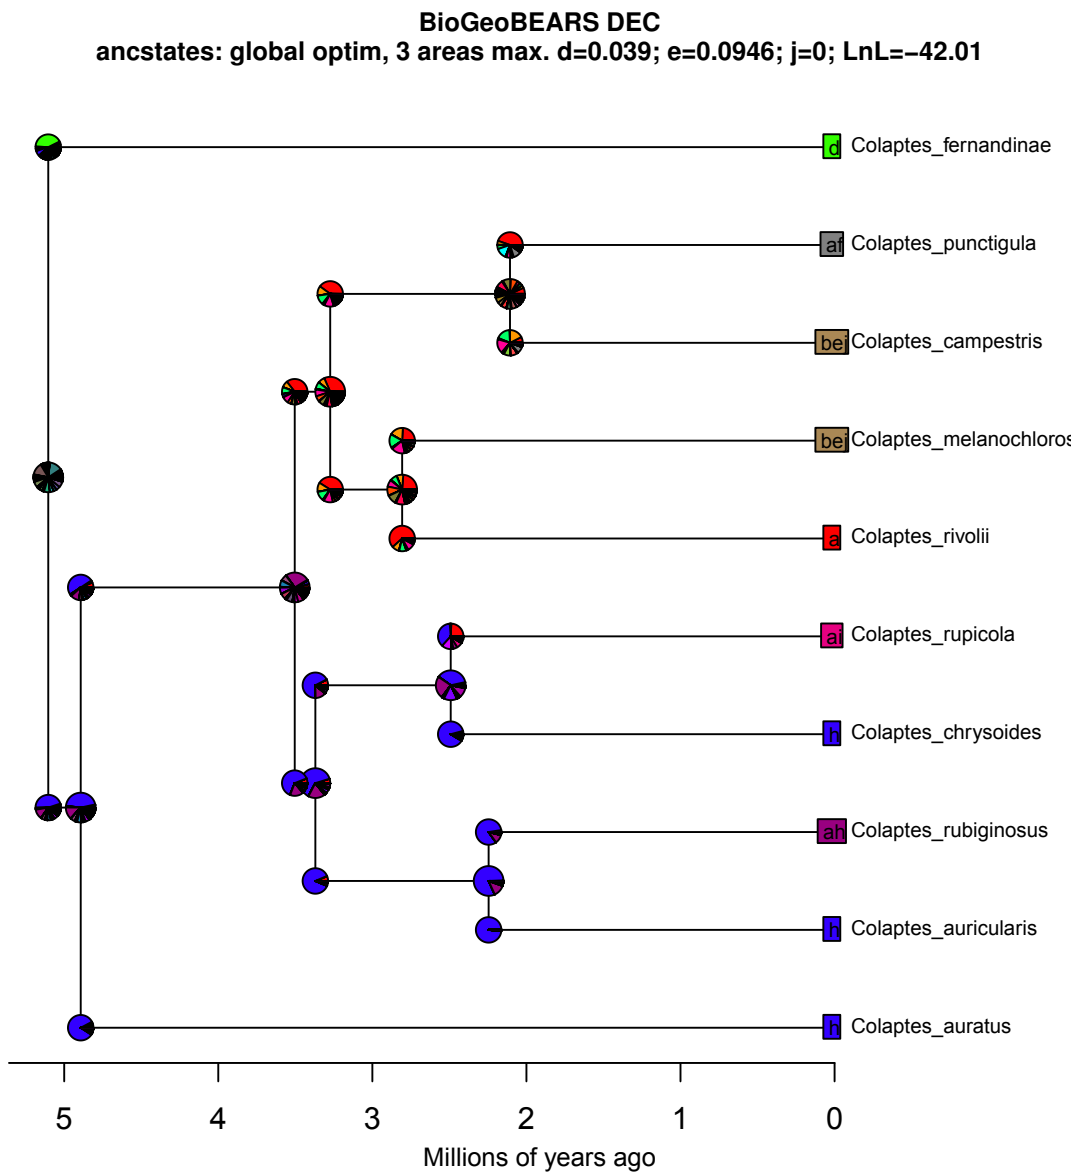

Figure S5: Clades of birds

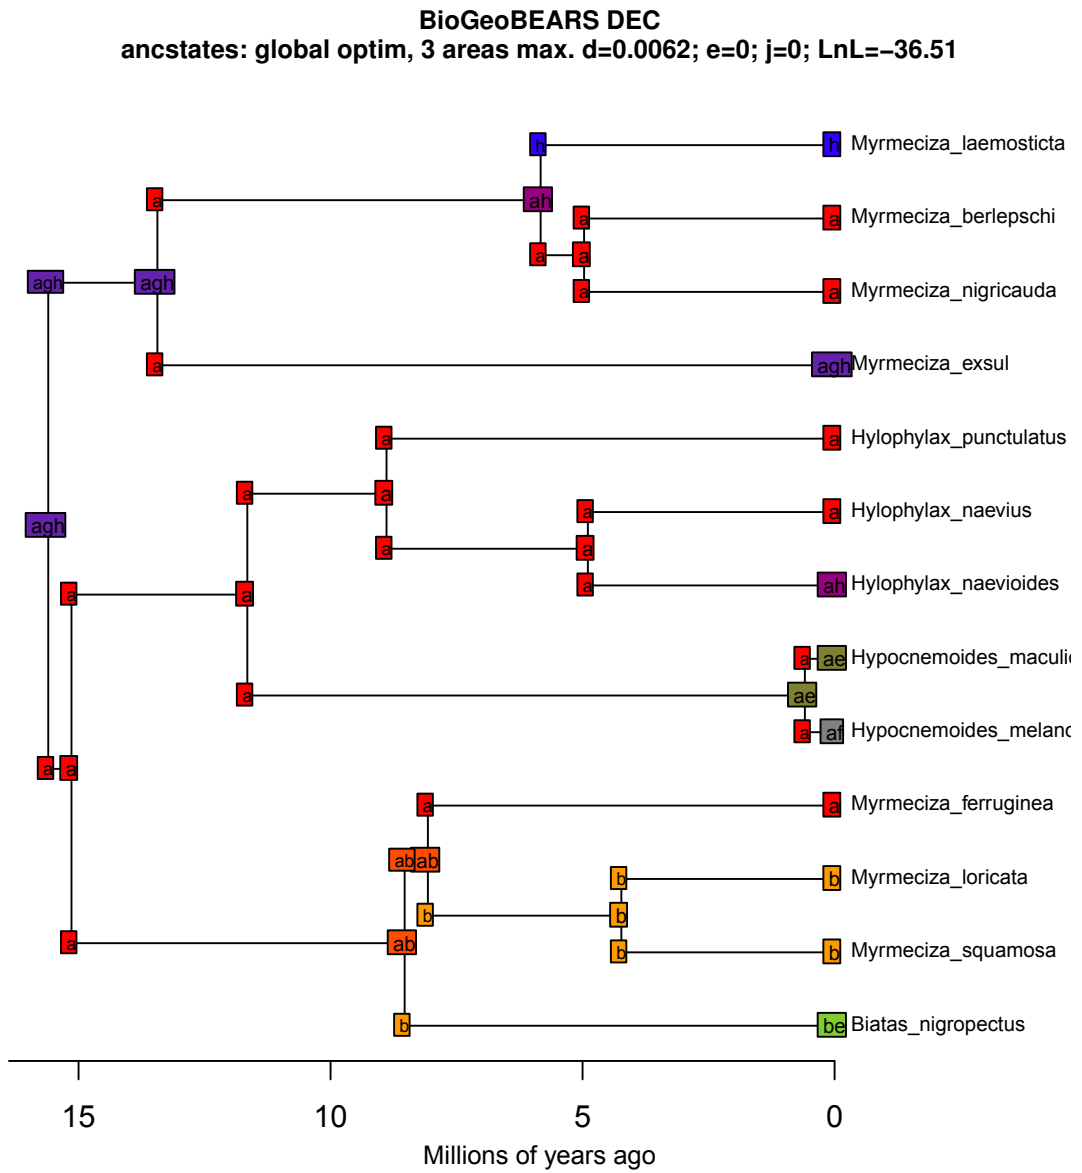

Figure S5: Clades of birds

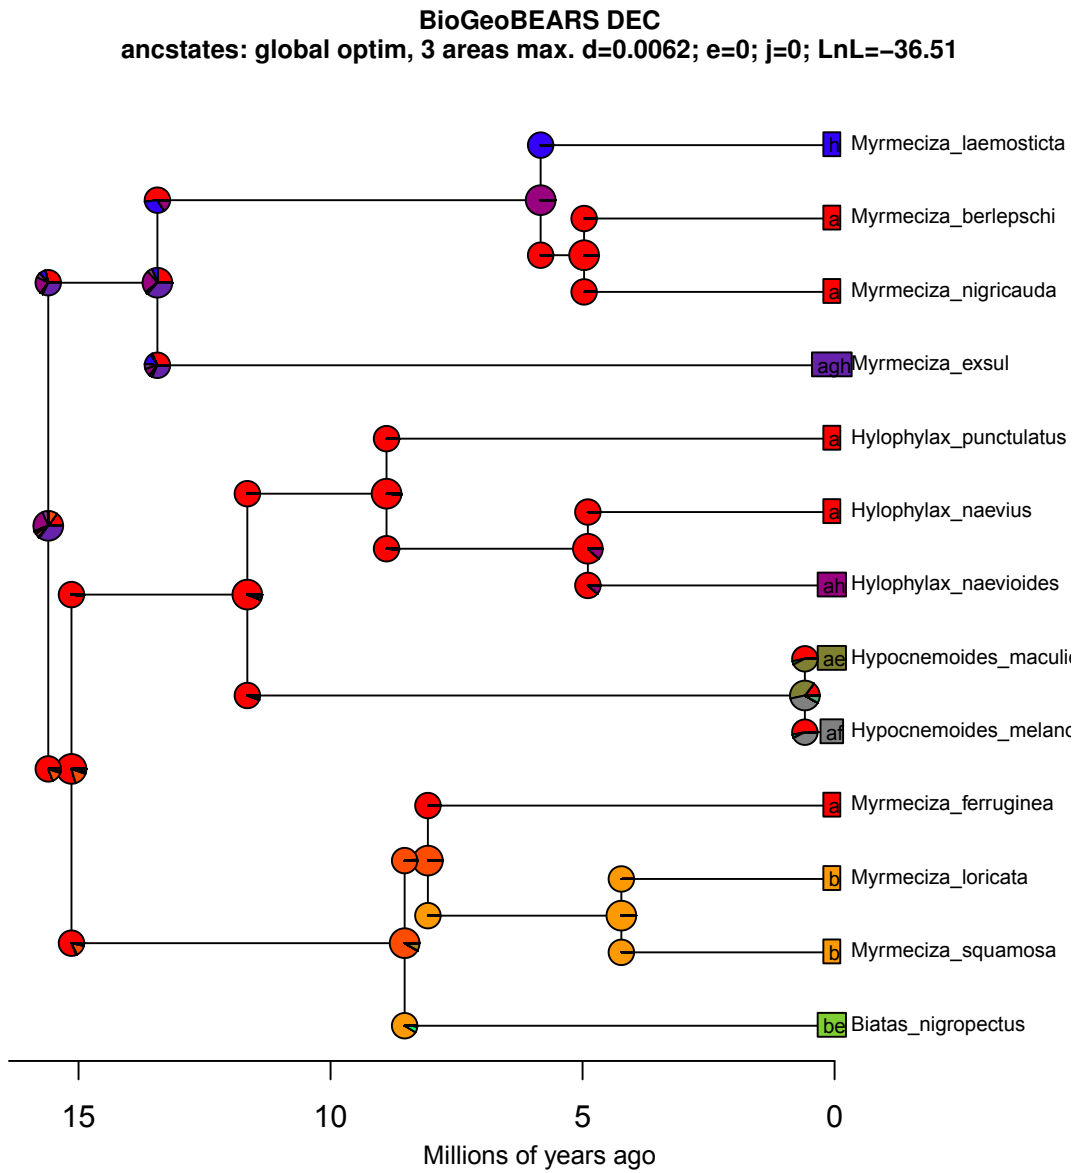

Figure S5: Clades of birds

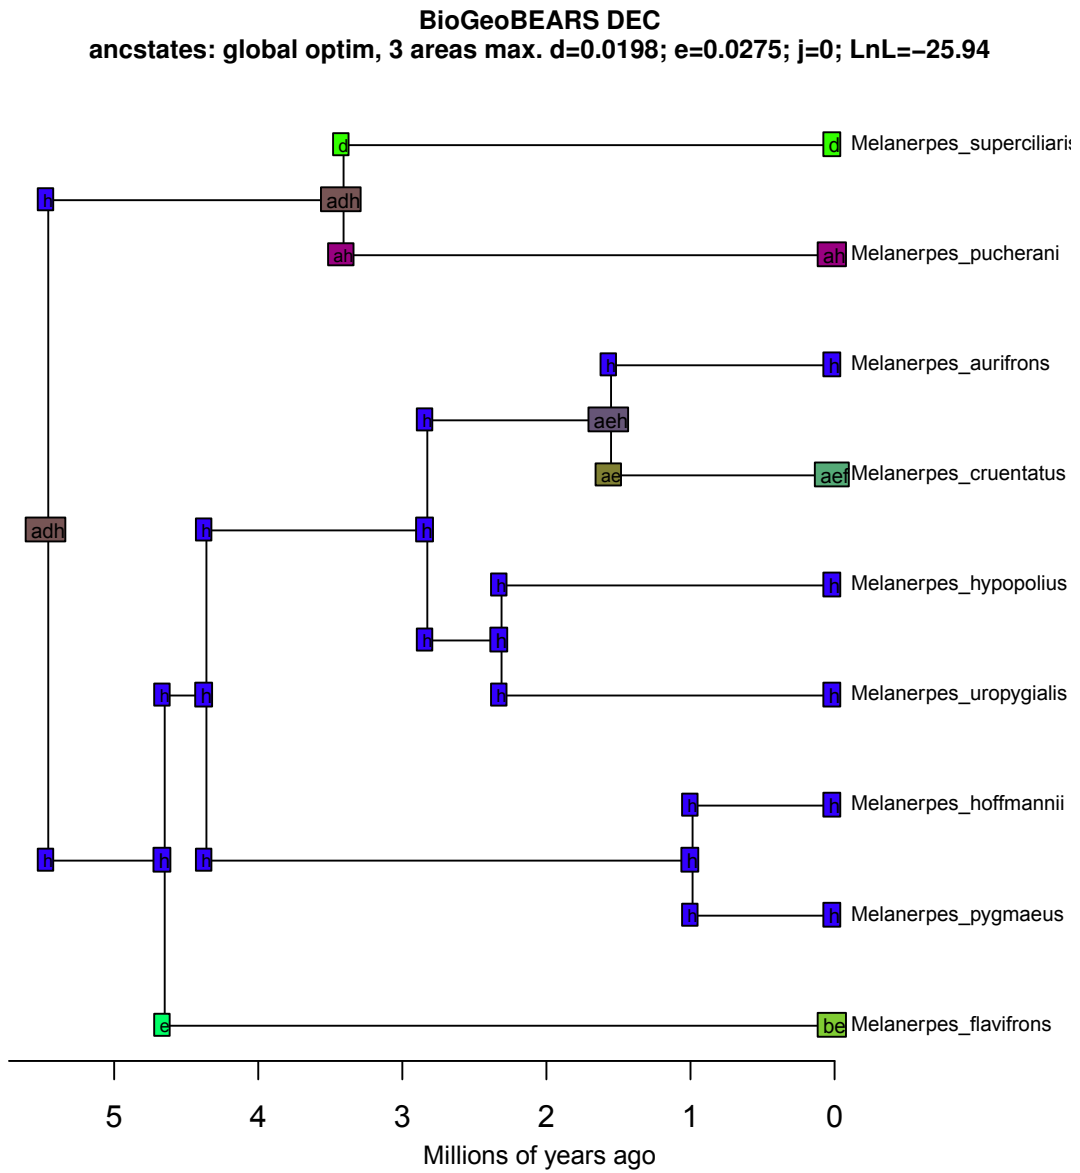

Figure S5: Clades of birds

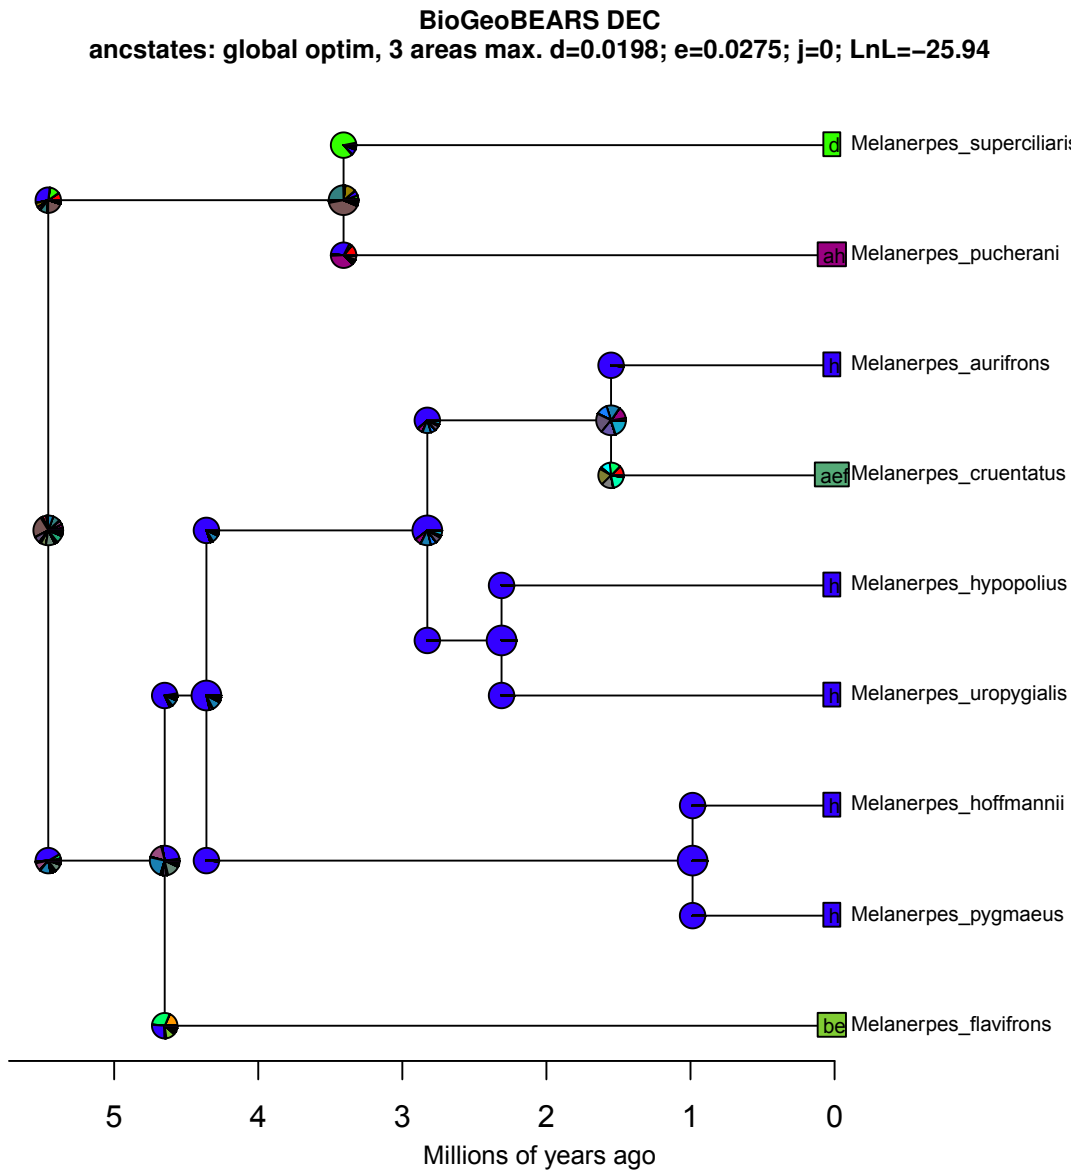

Figure S5: Clades of birds

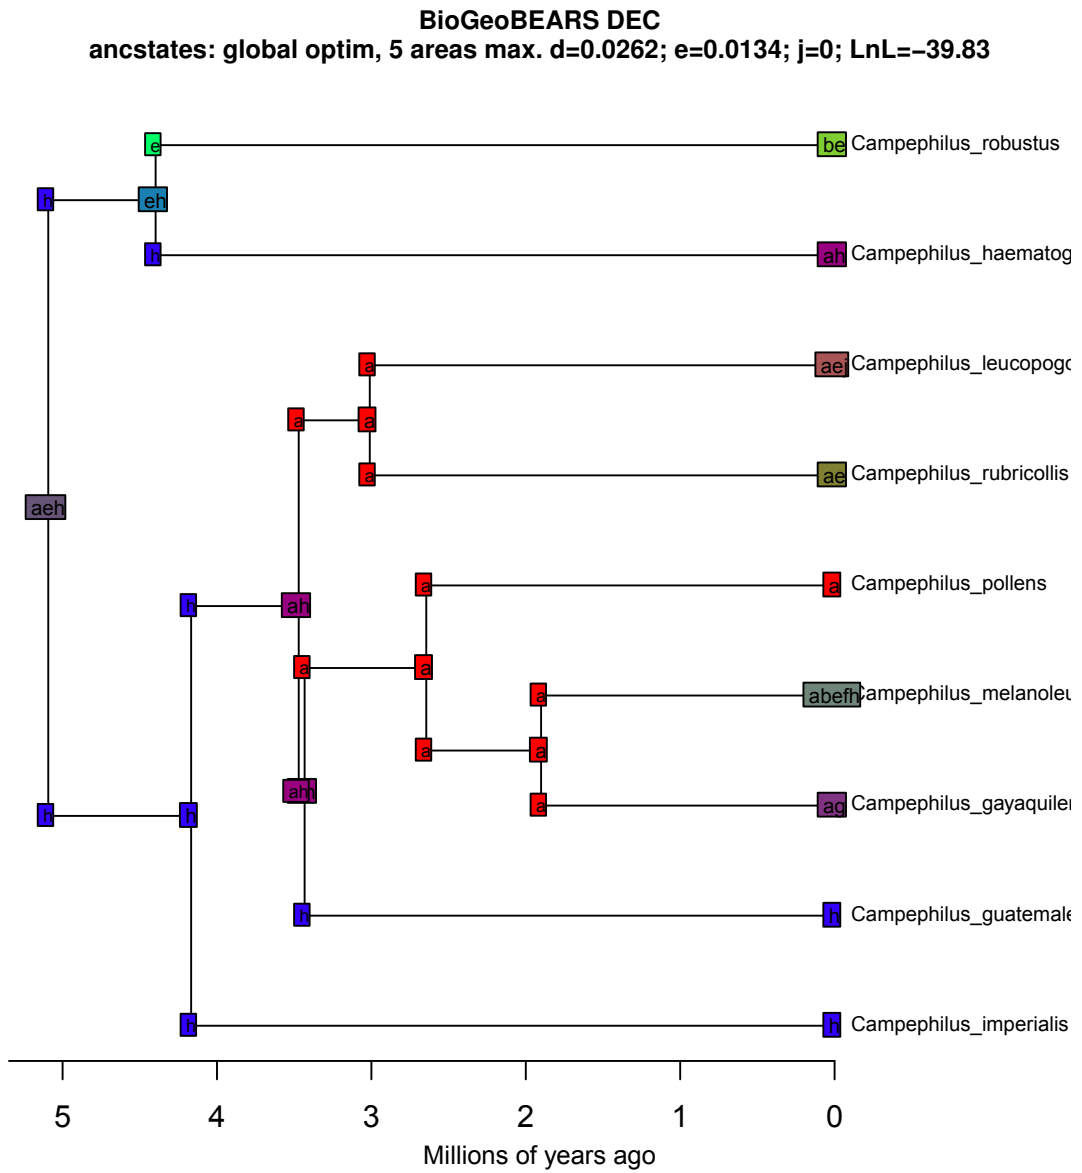



Figure S5: Clades of birds

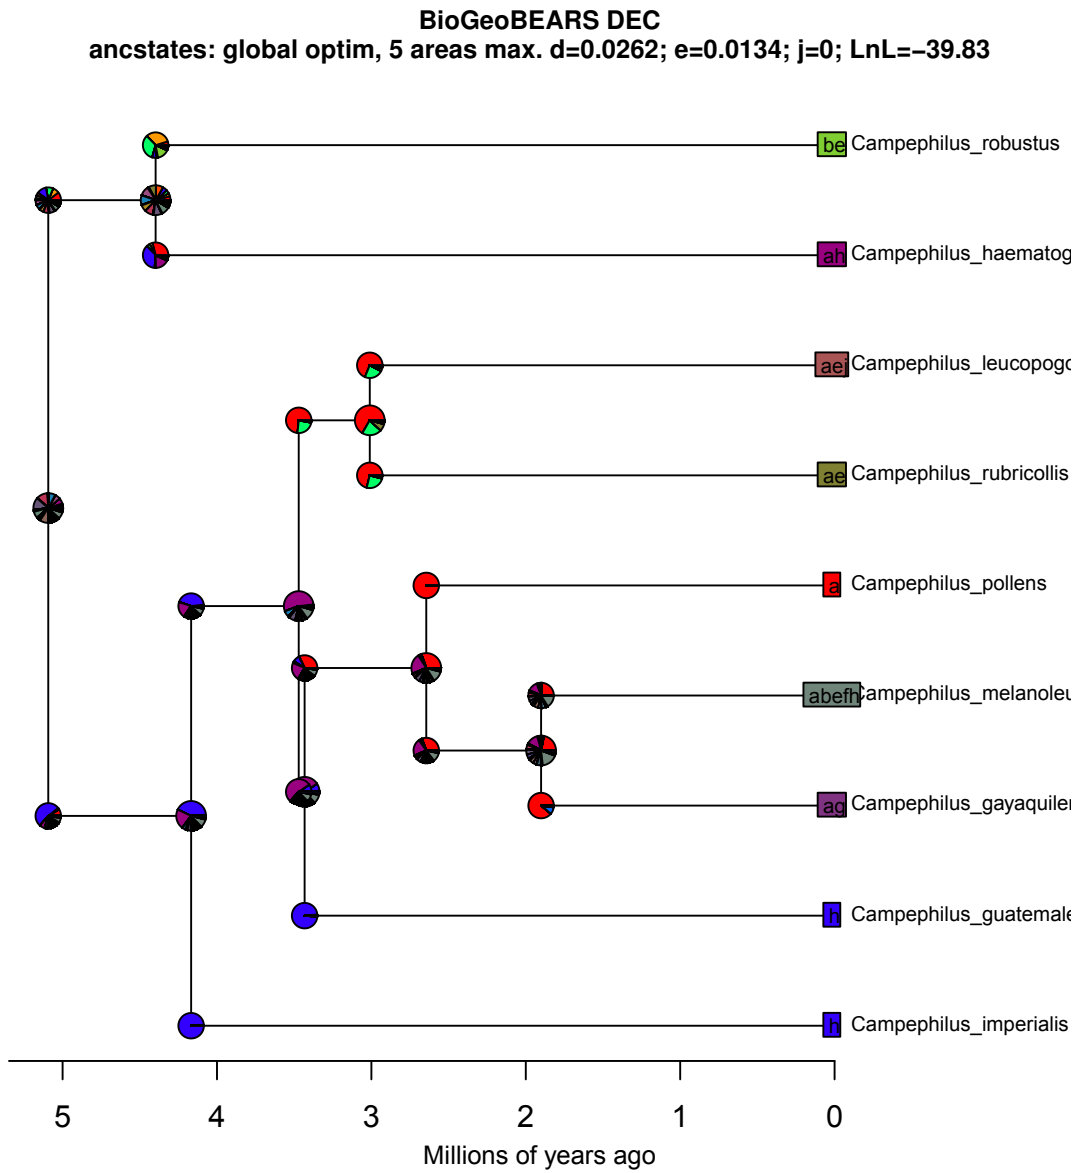

Figure S6: Clades of ferns

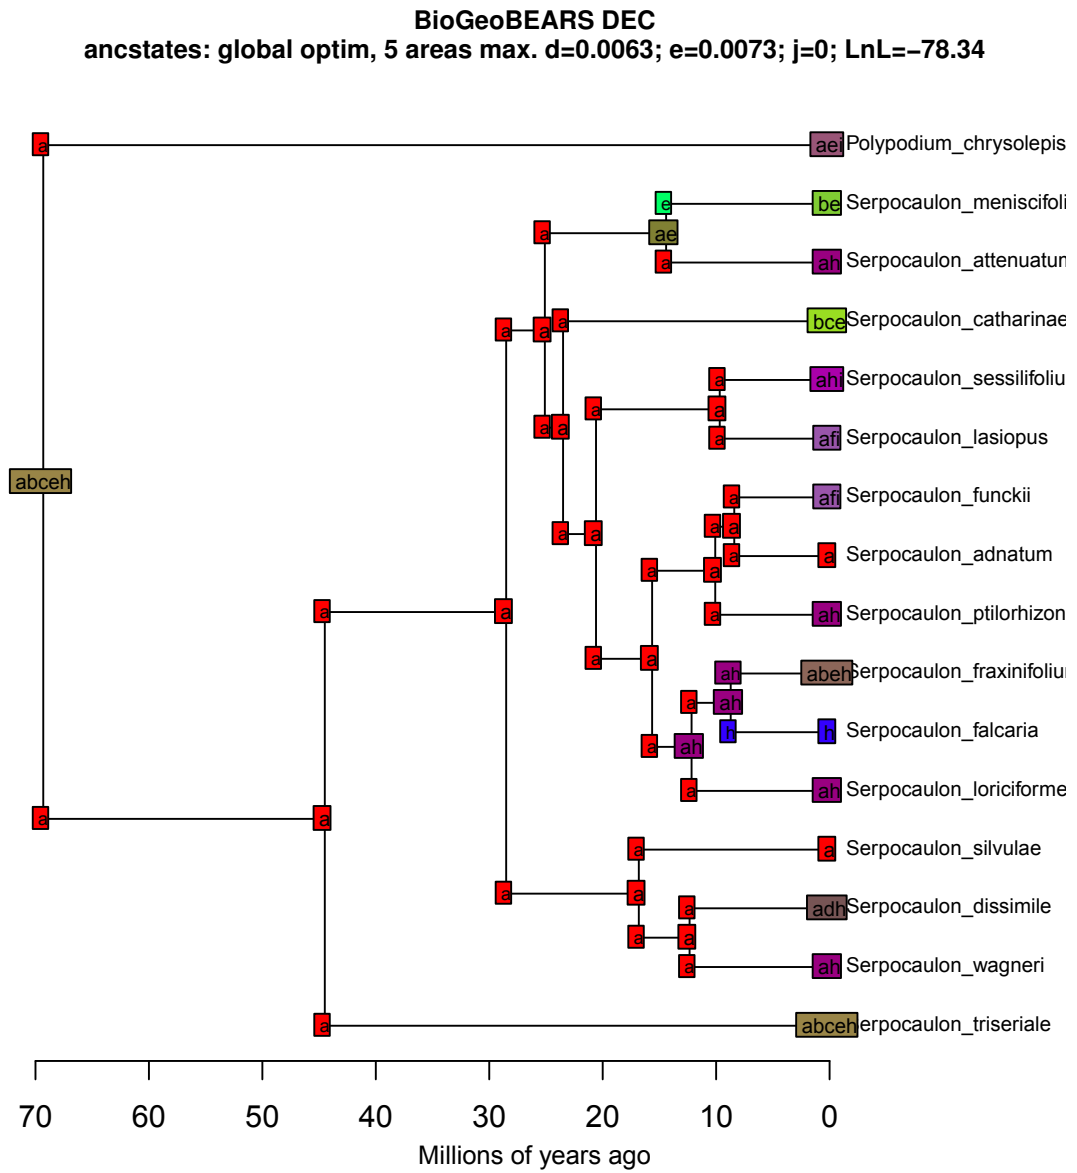

Figure S6: Clades of ferns

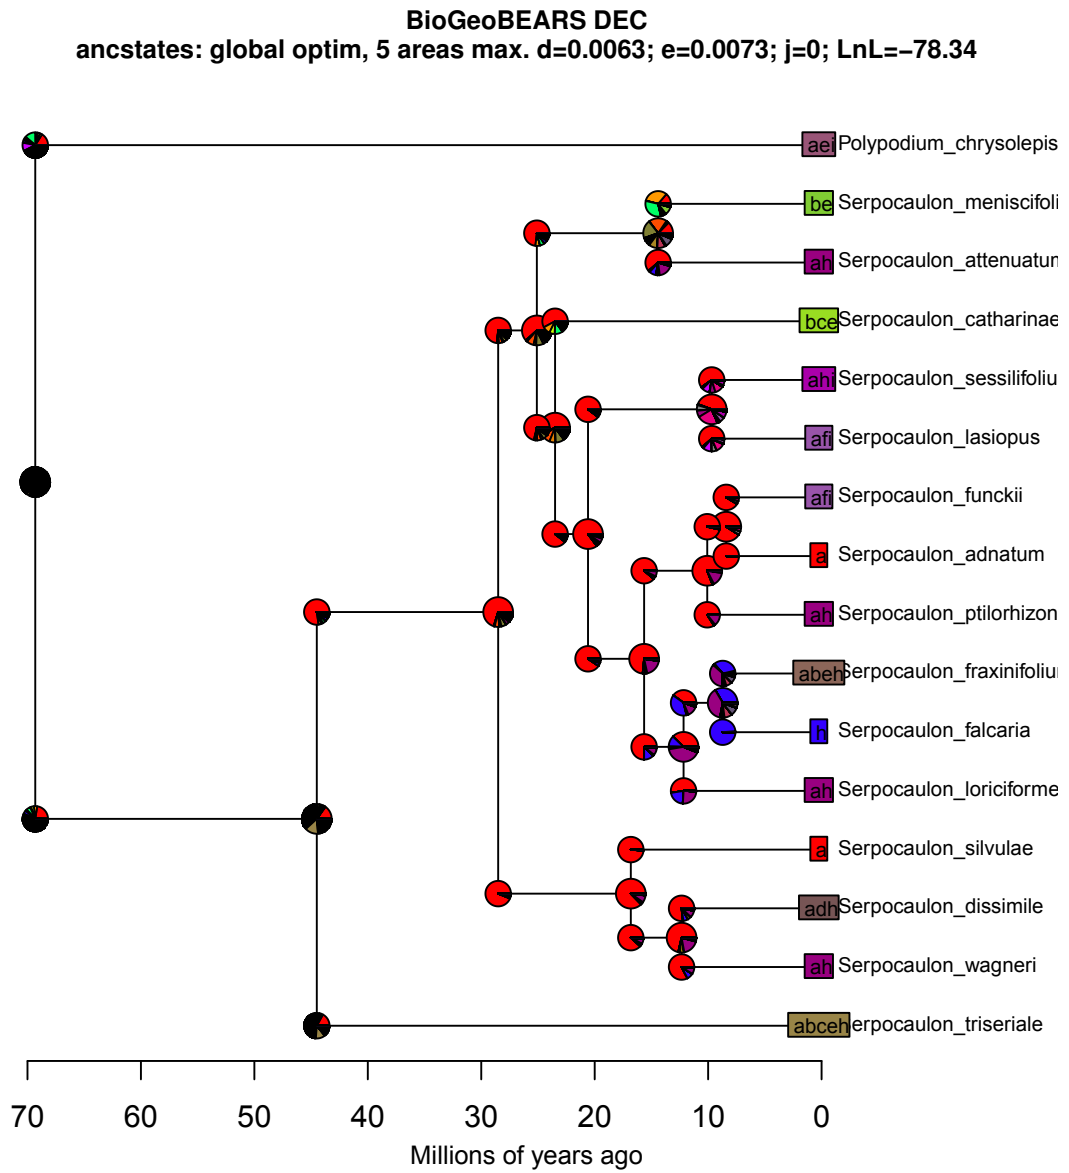

Figure S6: Clades of ferns

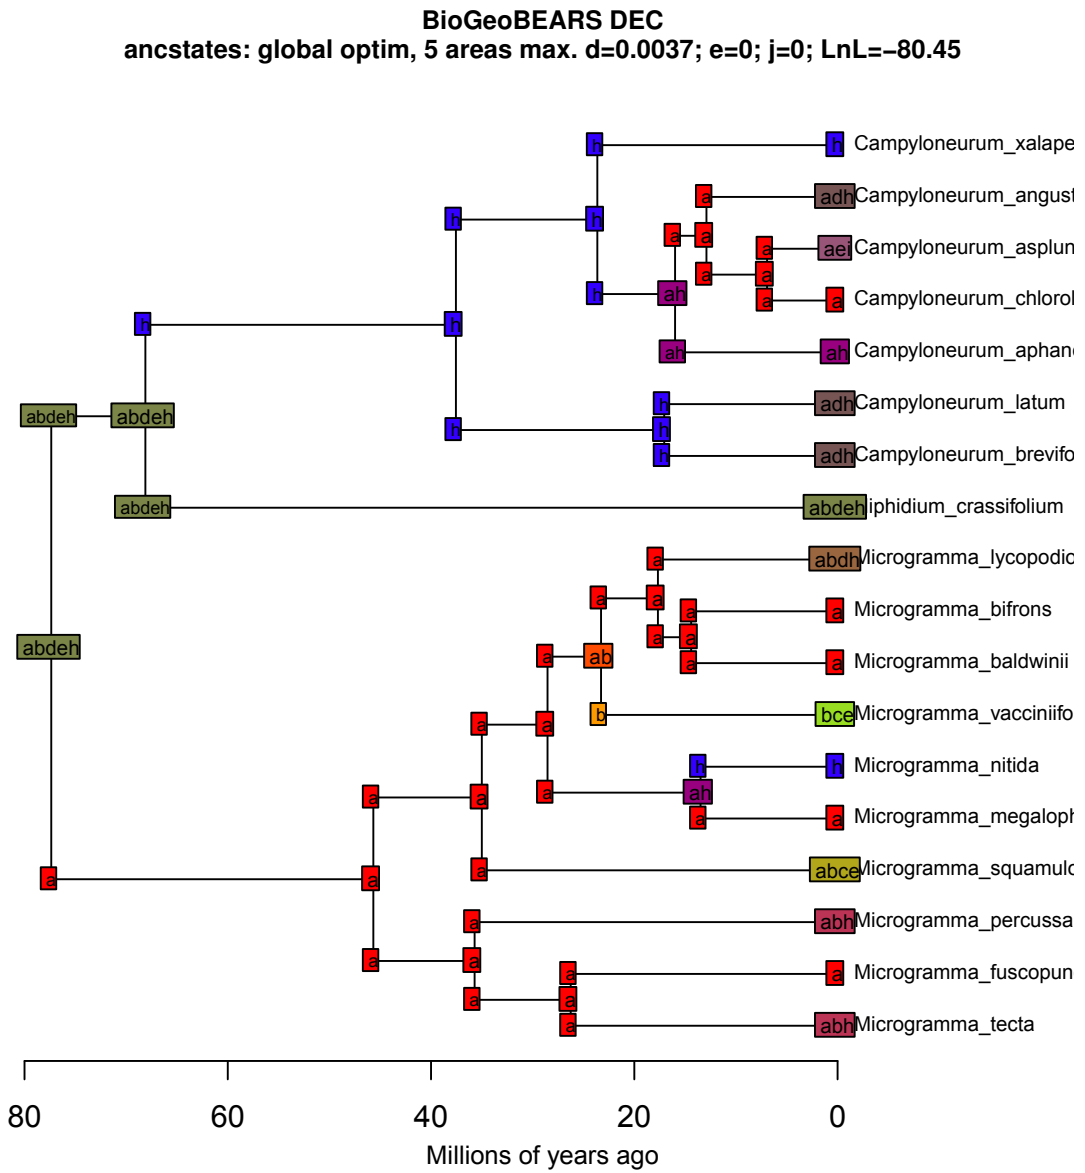

Figure S6: Clades of ferns

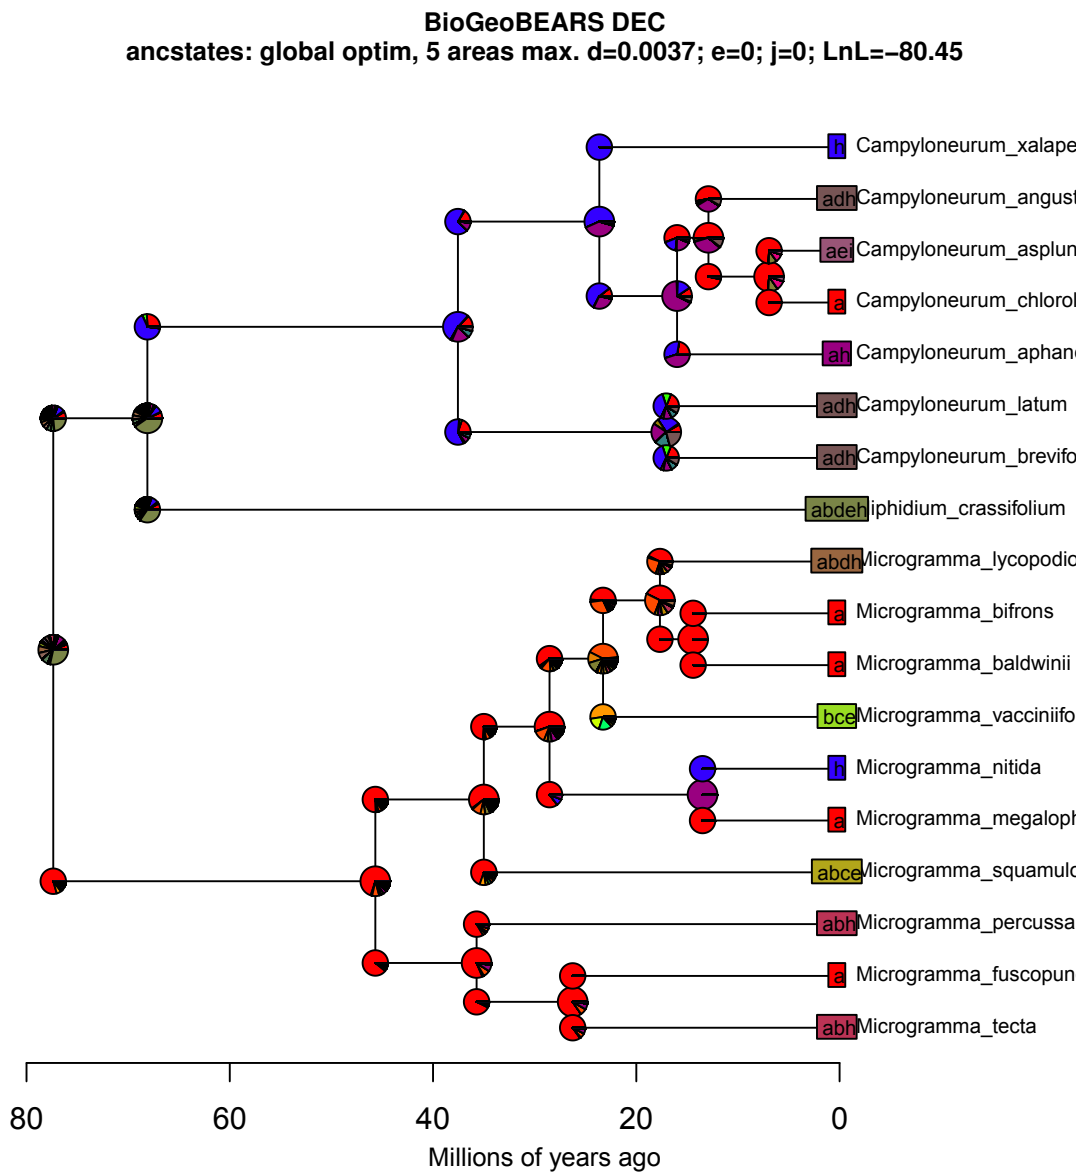

Figure S6: Clades of ferns

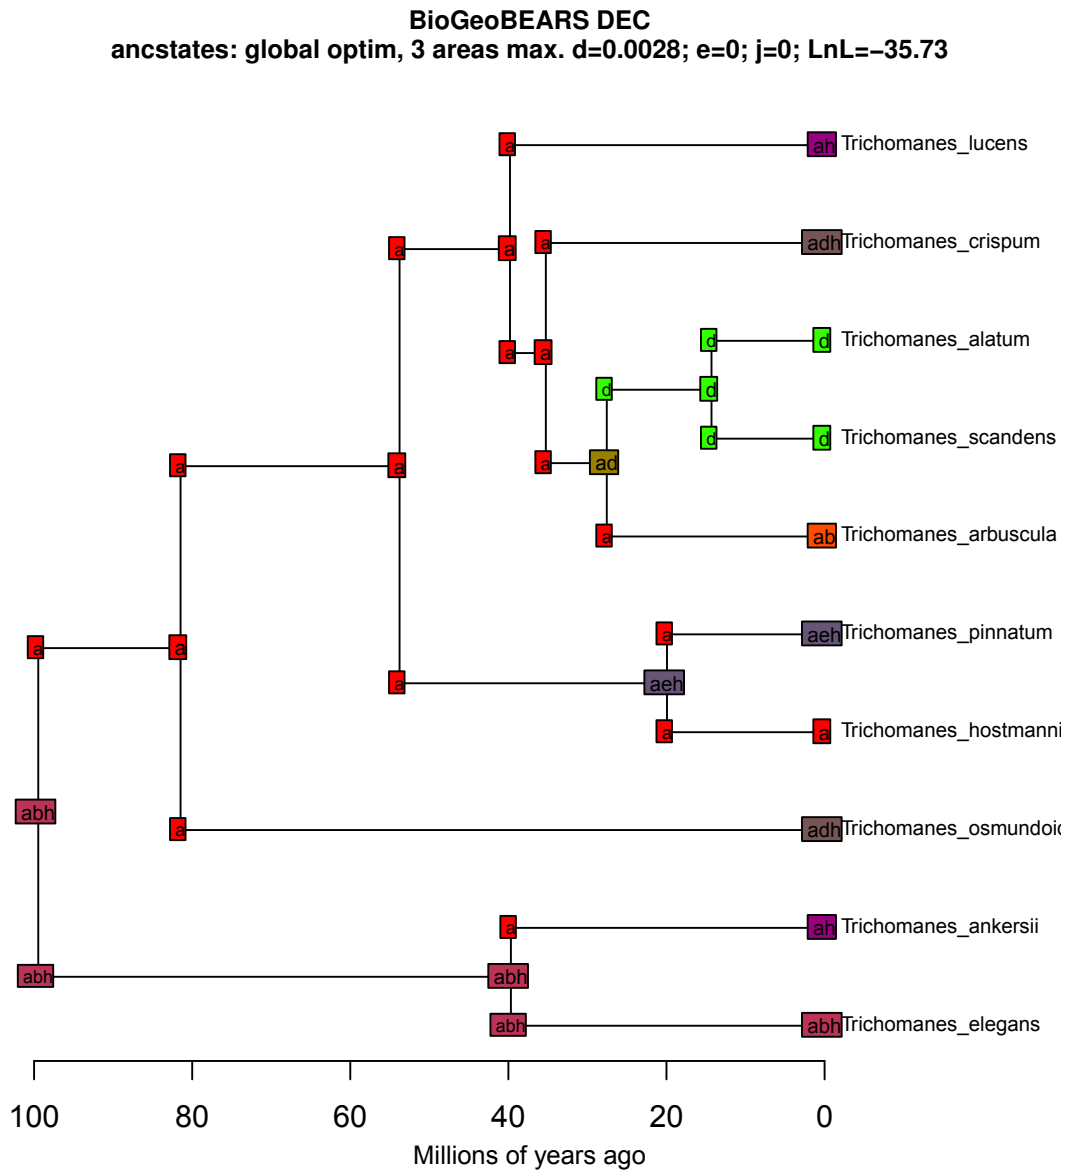

Figure S6: Clades of ferns

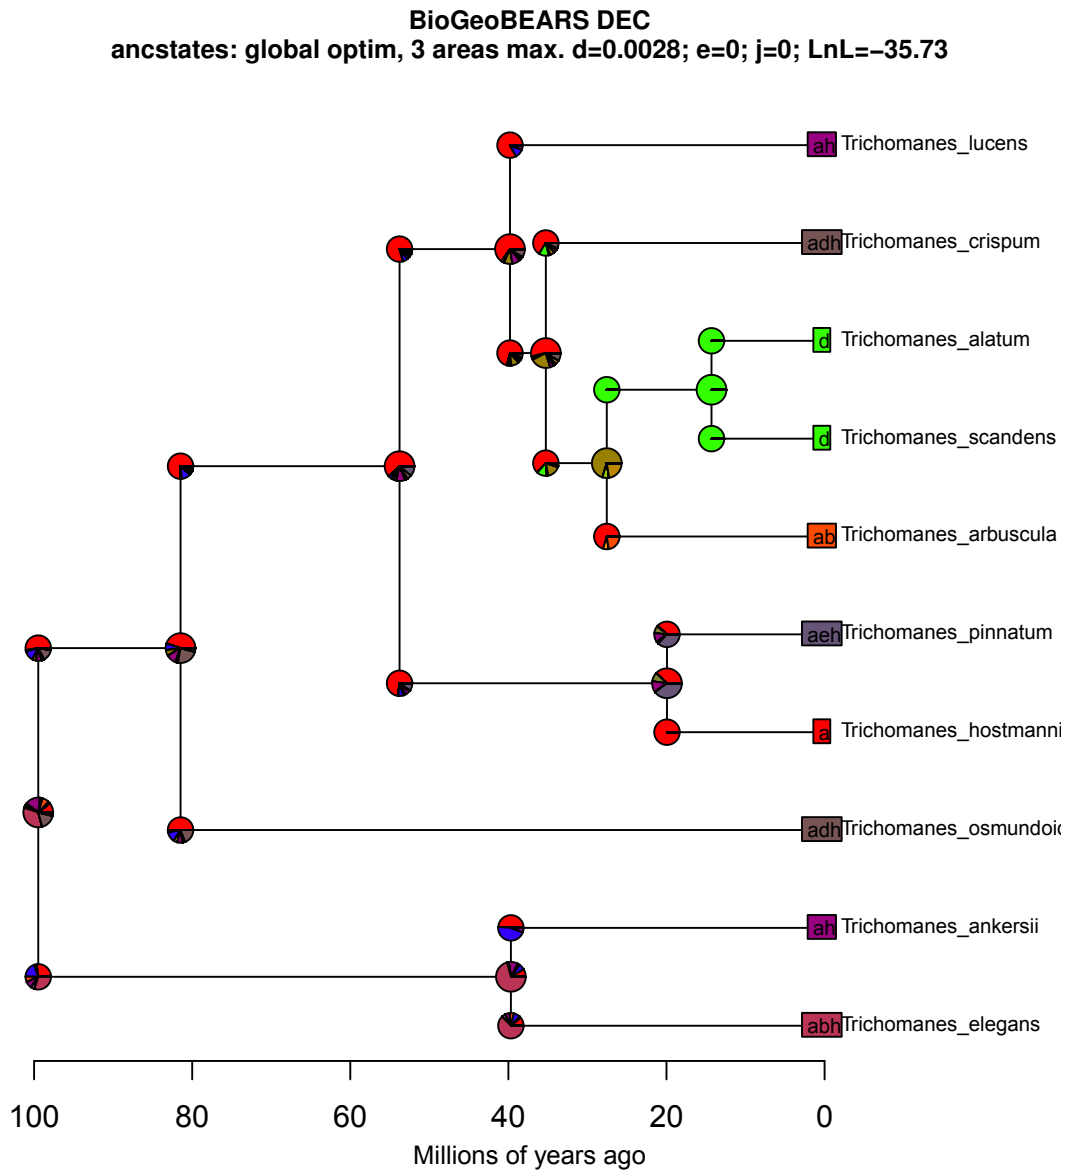

Figure S6: Clades of ferns

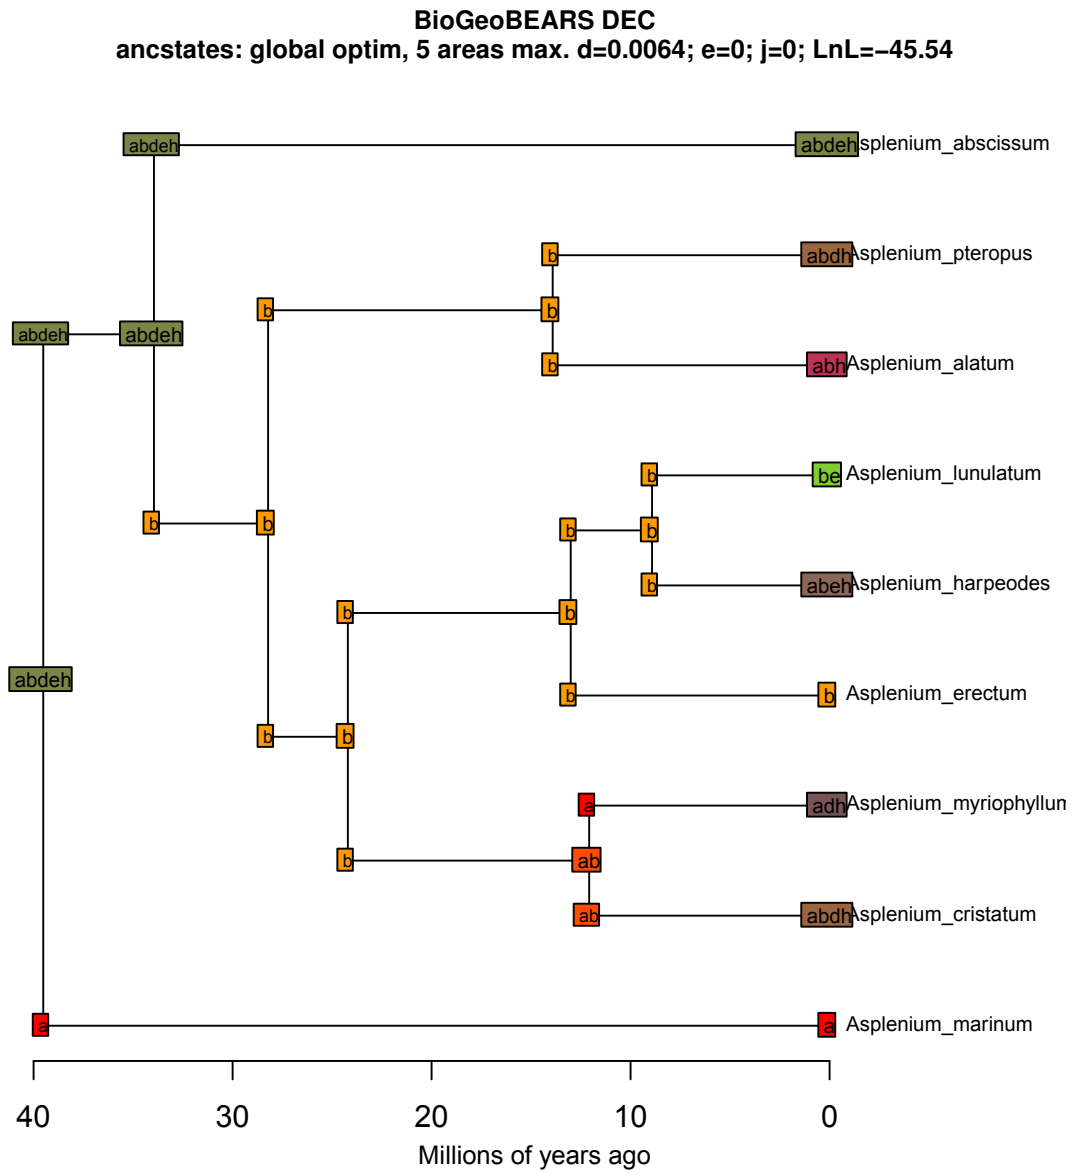



Figure S6: Clades of ferns

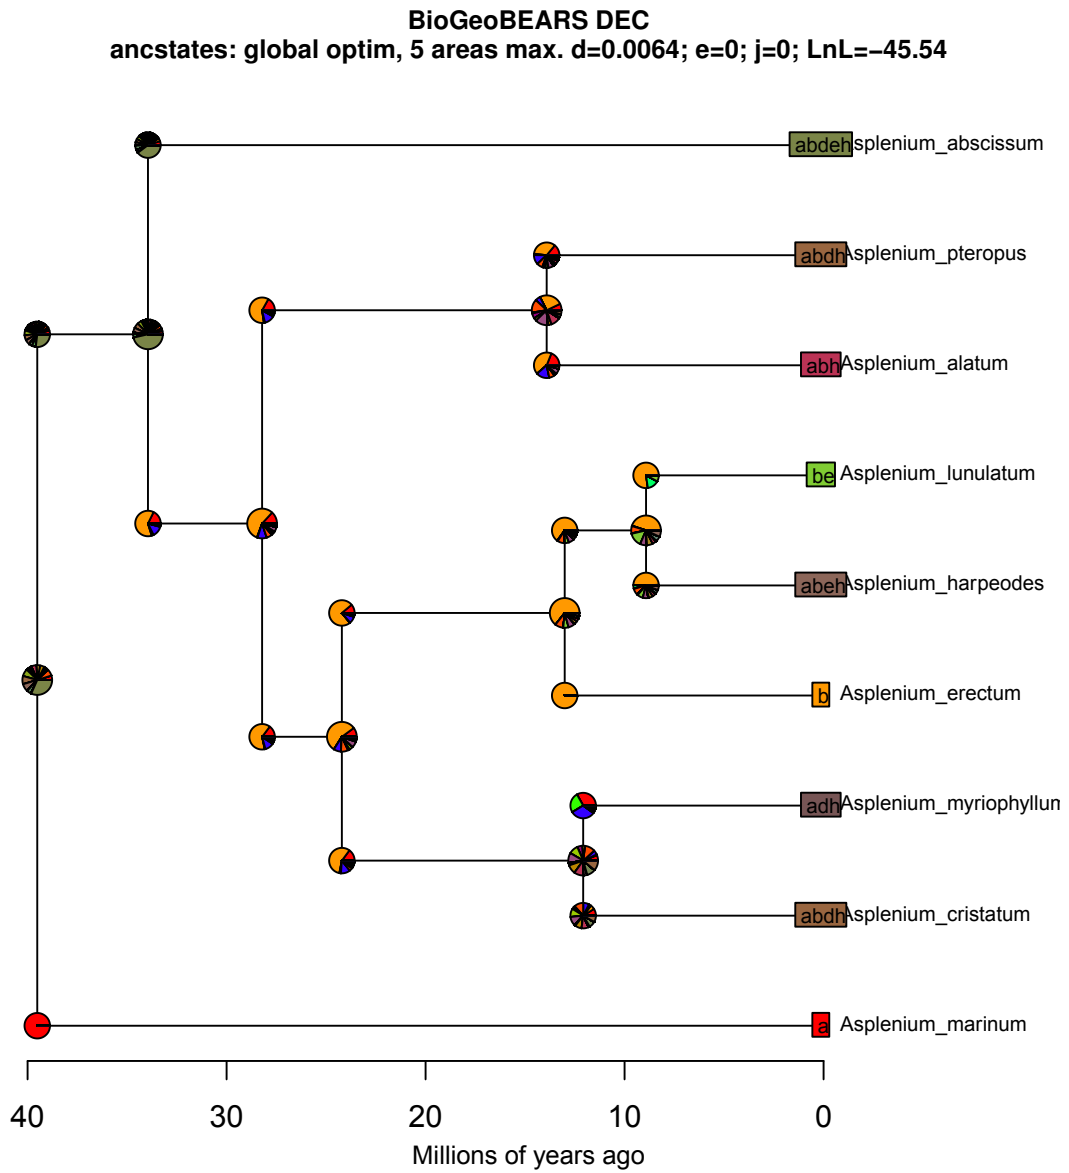

Figure S7: Clades of mammals

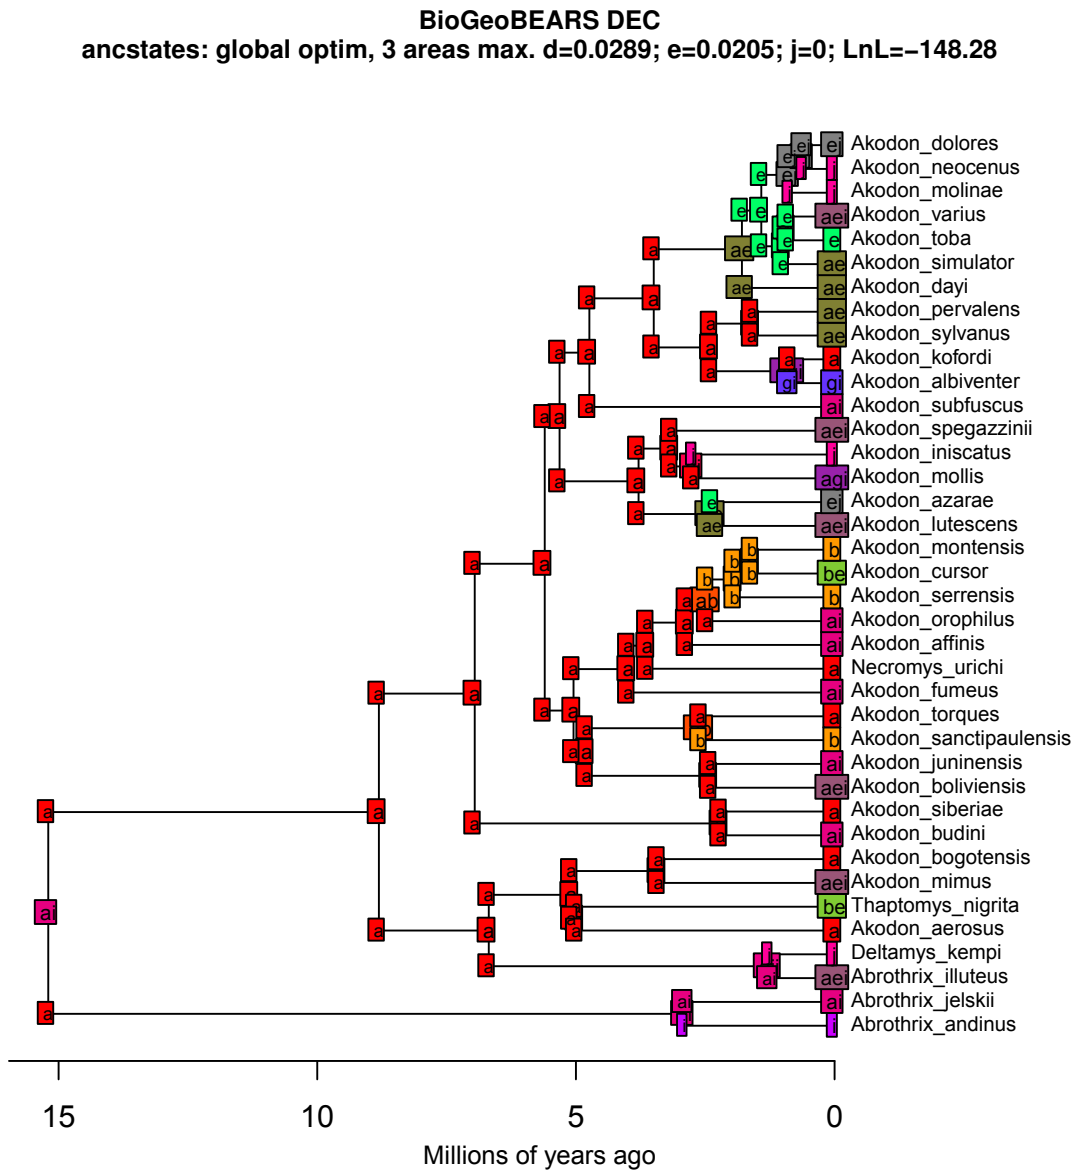

Figure S7: Clades of mammals

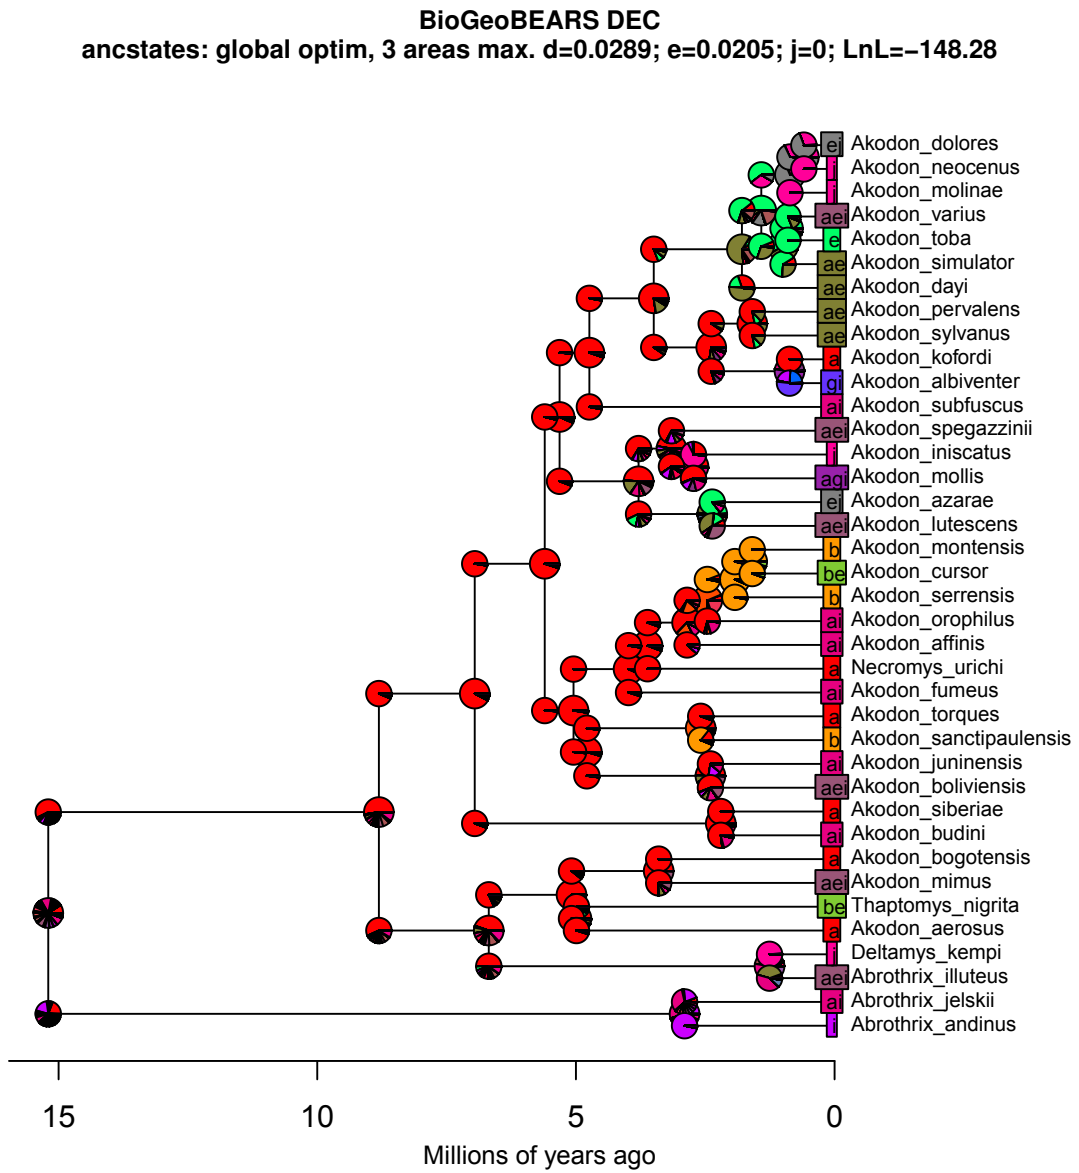

Figure S7: Clades of mammals

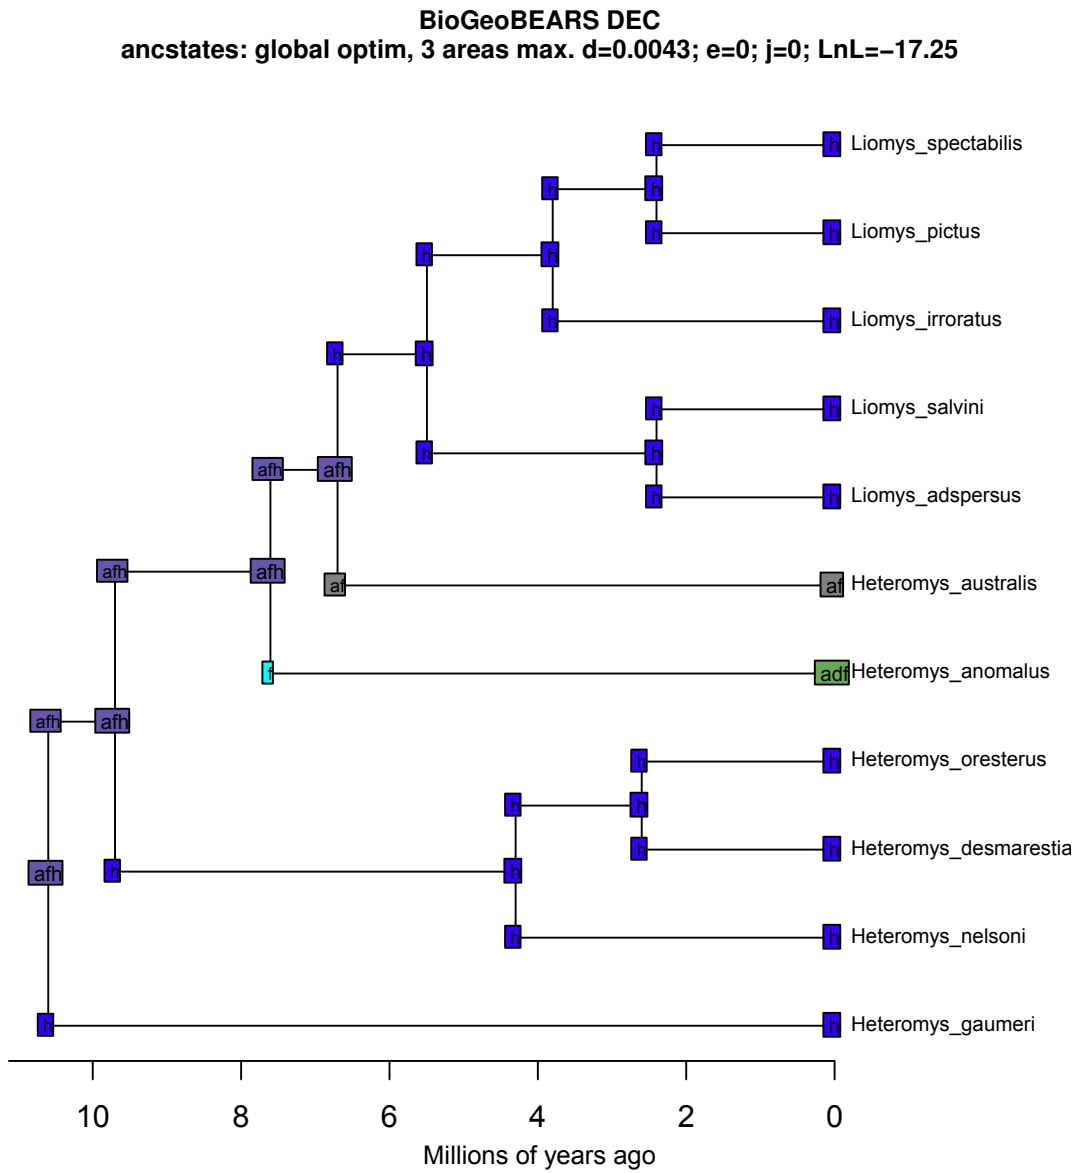

Figure S7: Clades of mammals

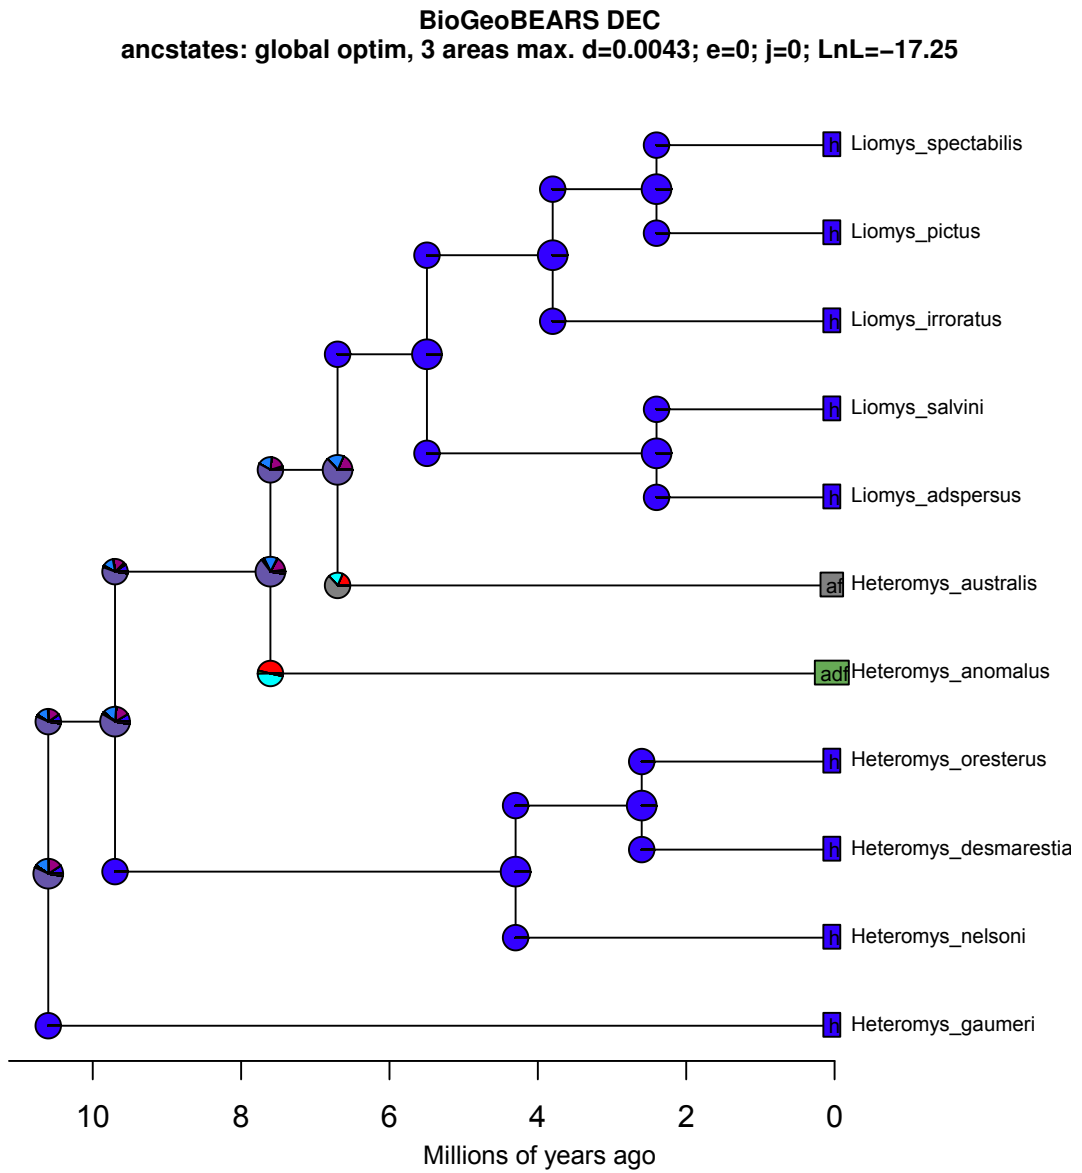

Figure S7: Clades of mammals

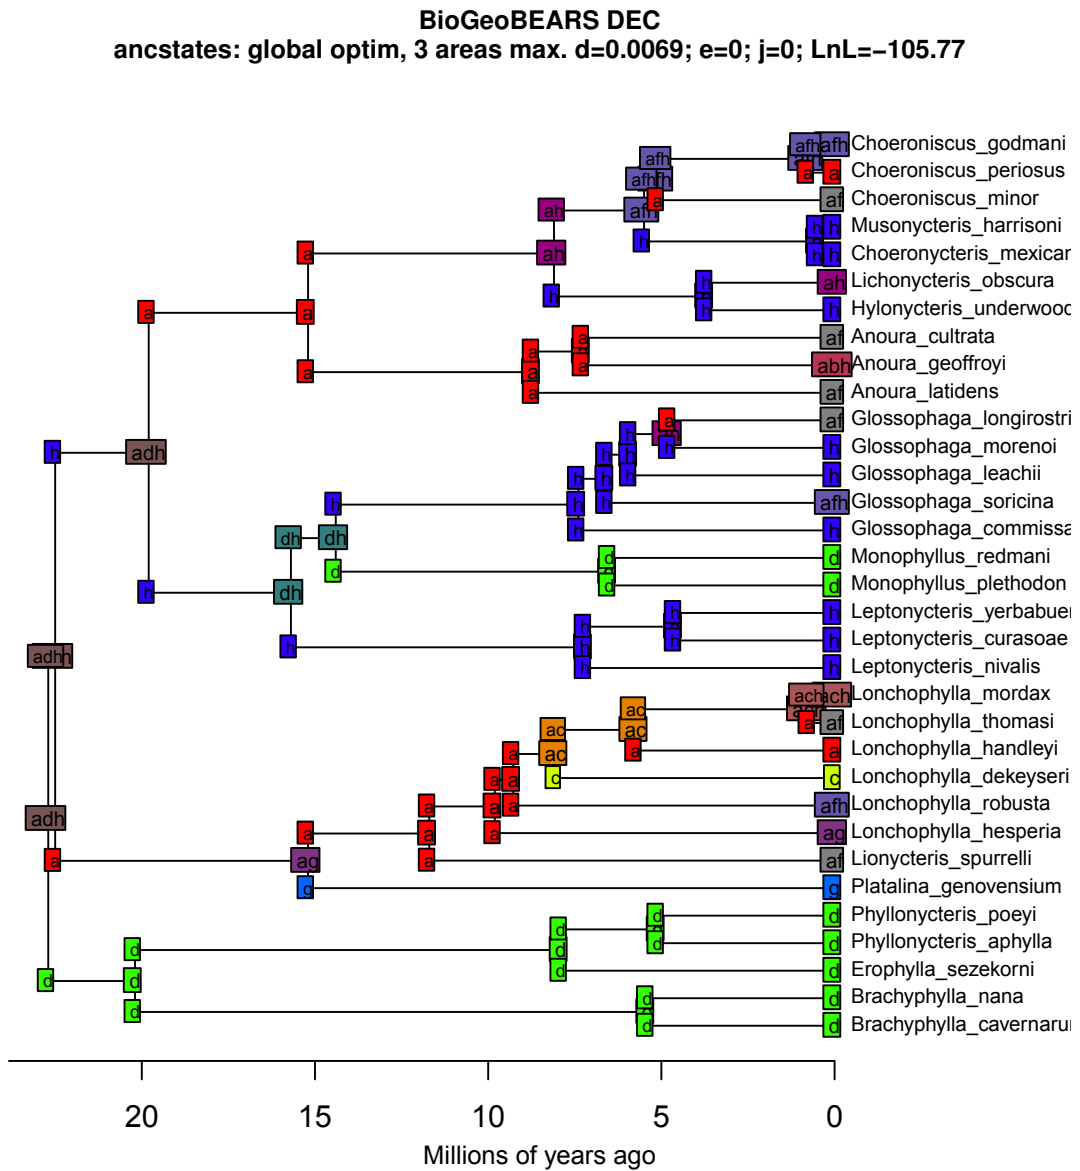

Figure S7: Clades of mammals

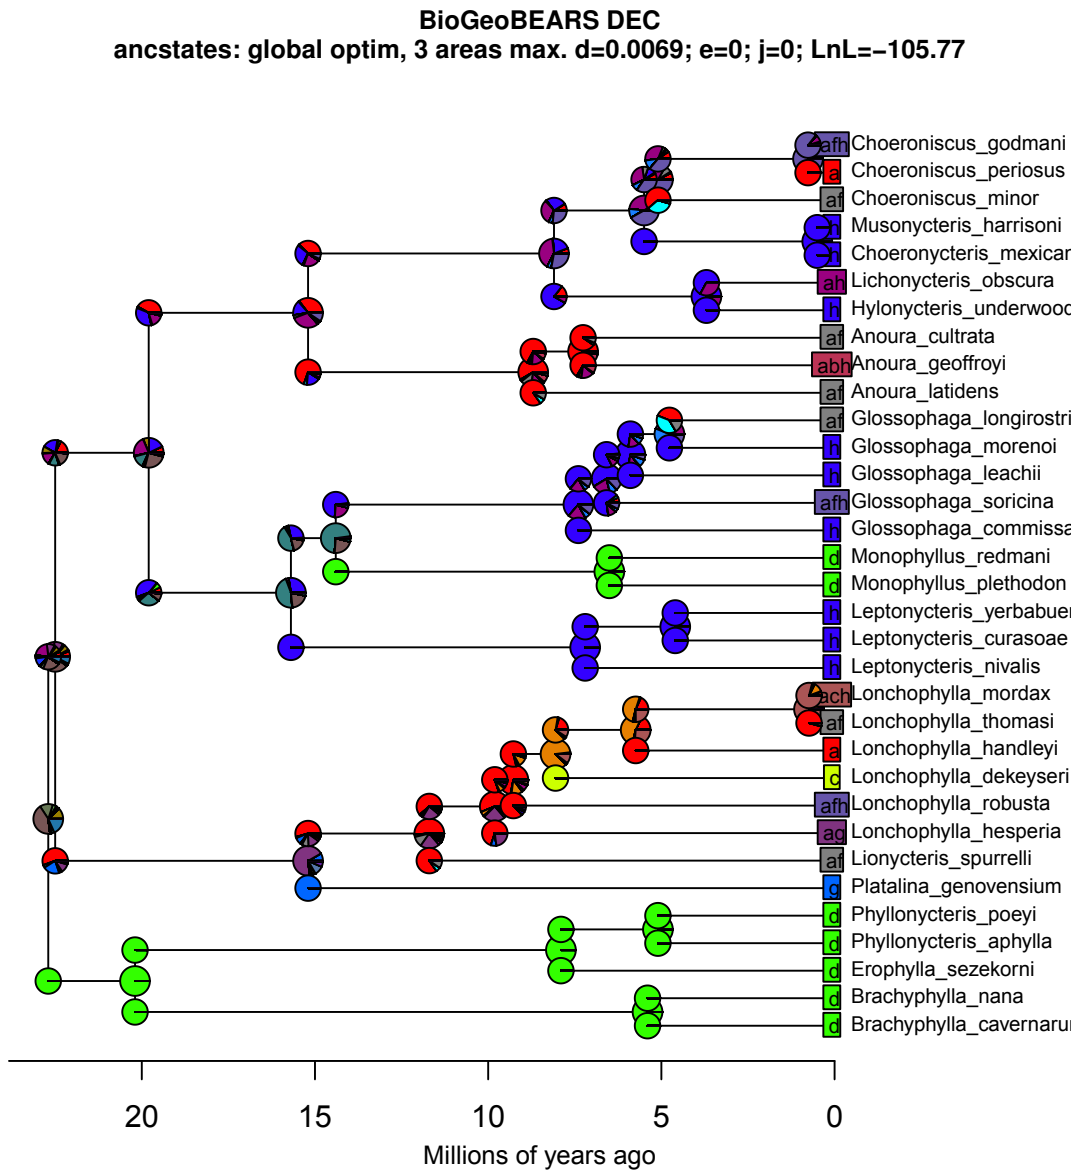

Figure S7: Clades of mammals

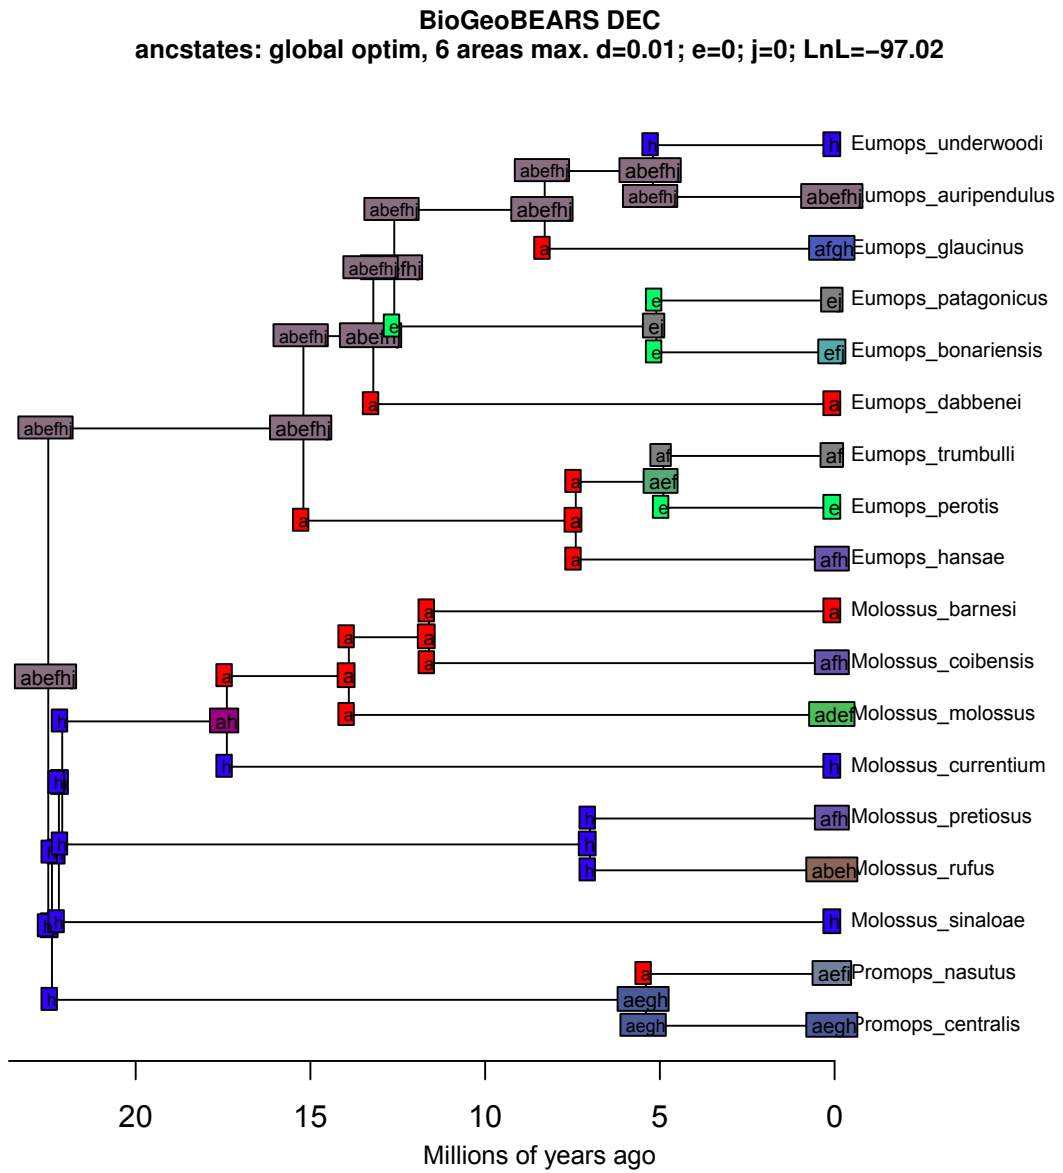



Figure S7: Clades of mammals

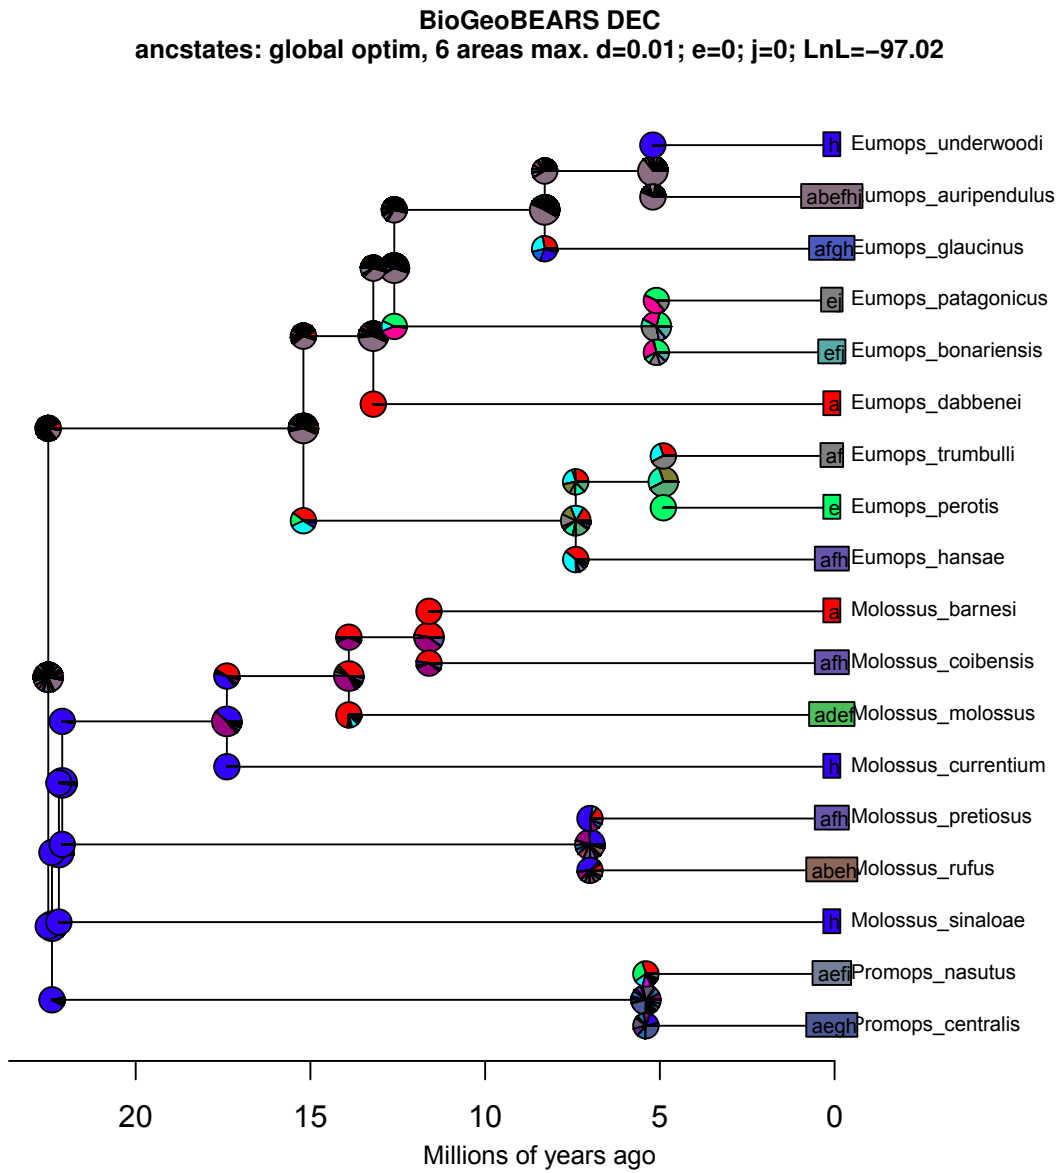

Figure S7: Clades of mammals

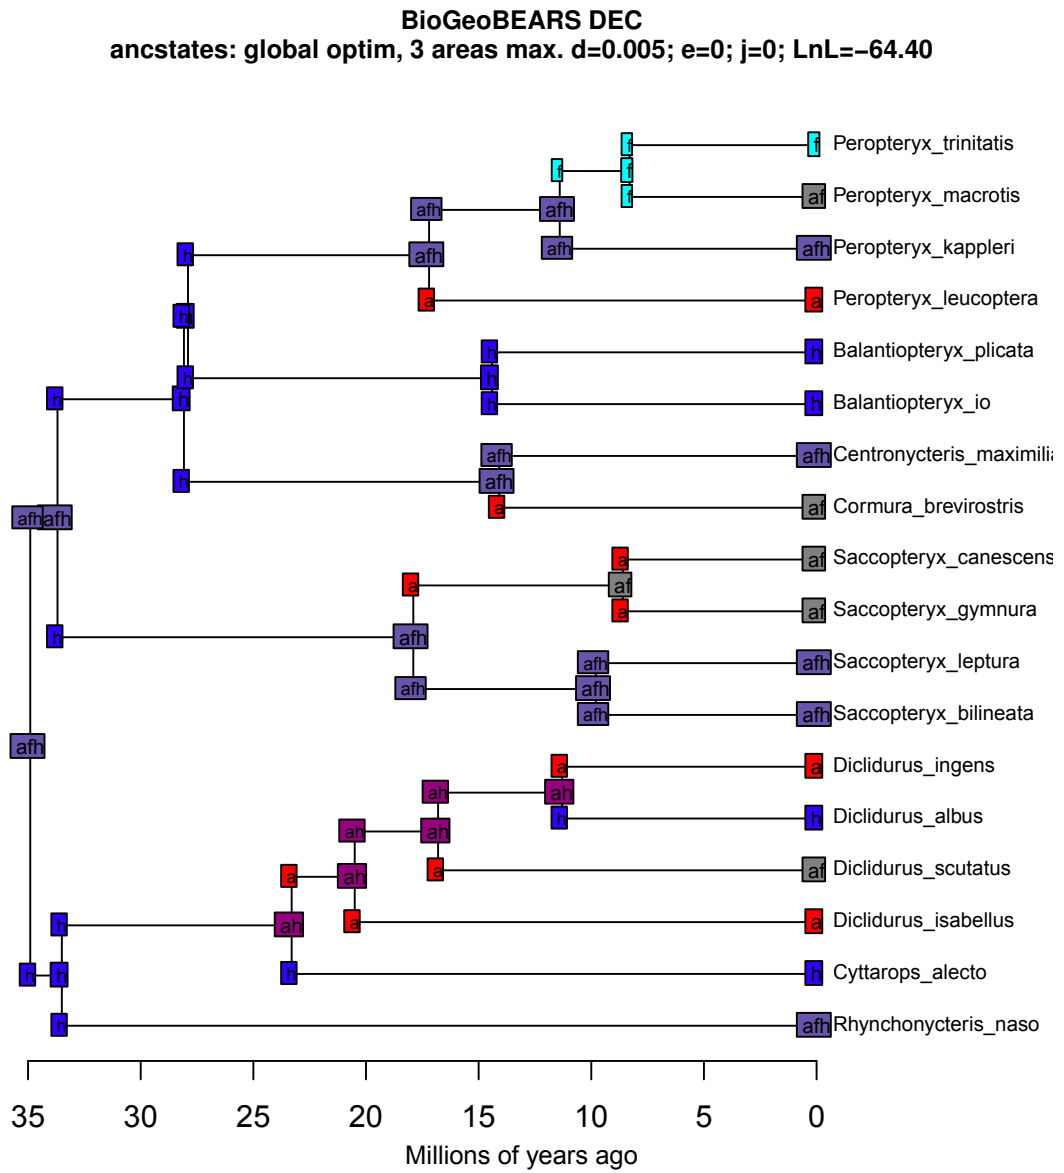

Figure S7: Clades of mammals

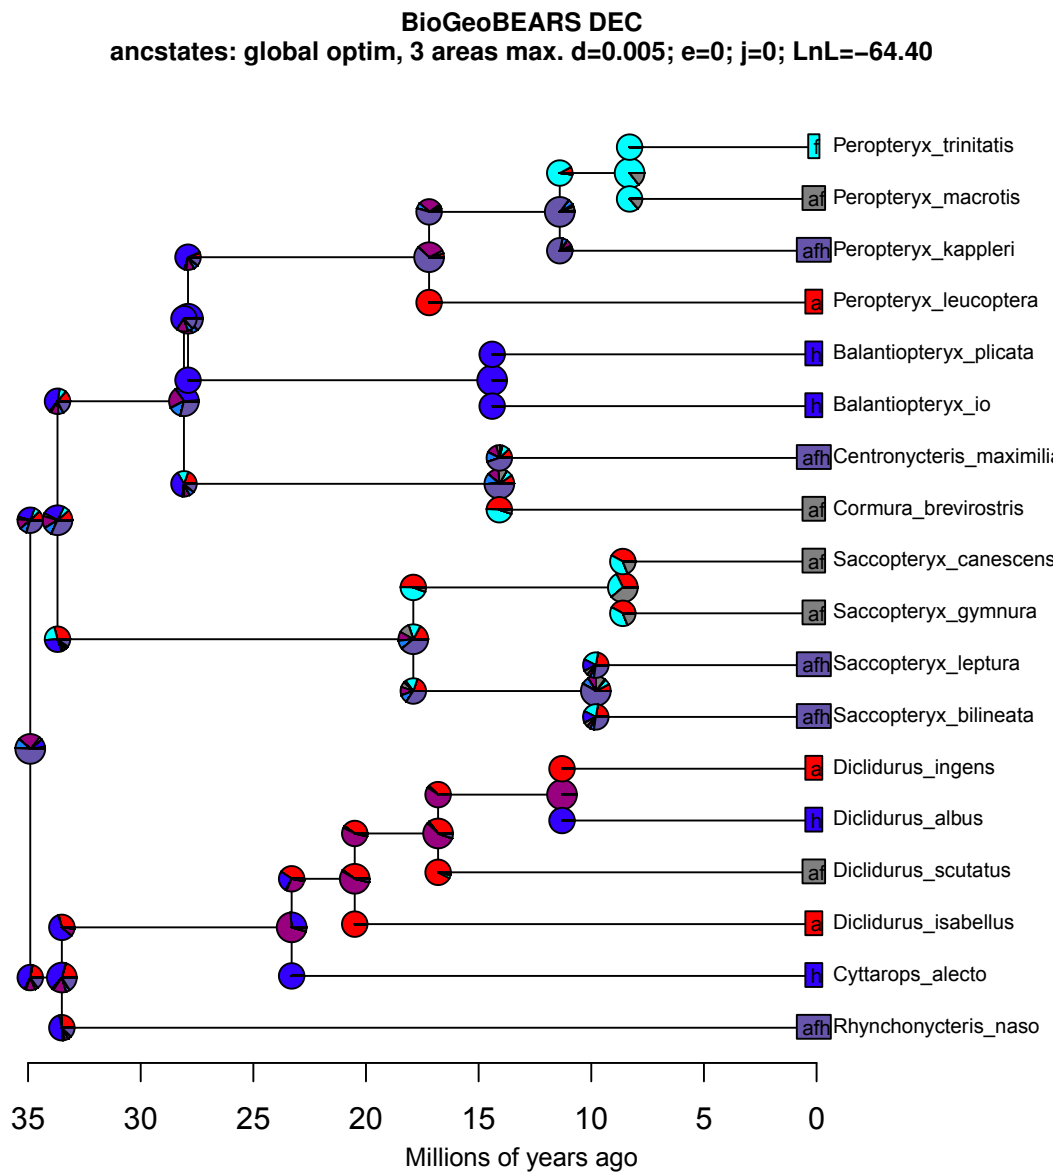

Figure S7: Clades of mammals

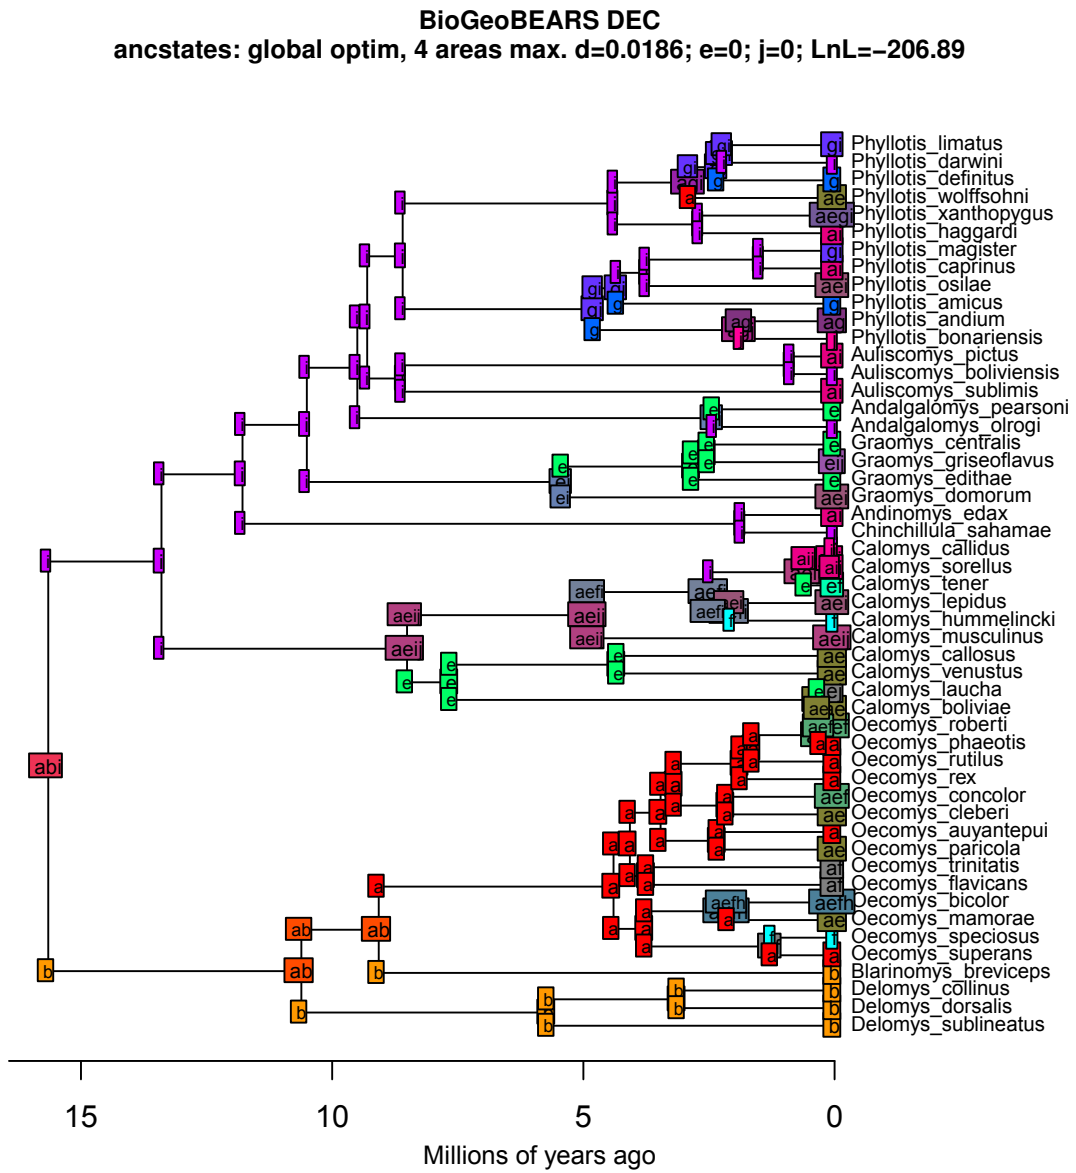

Figure S7: Clades of mammals

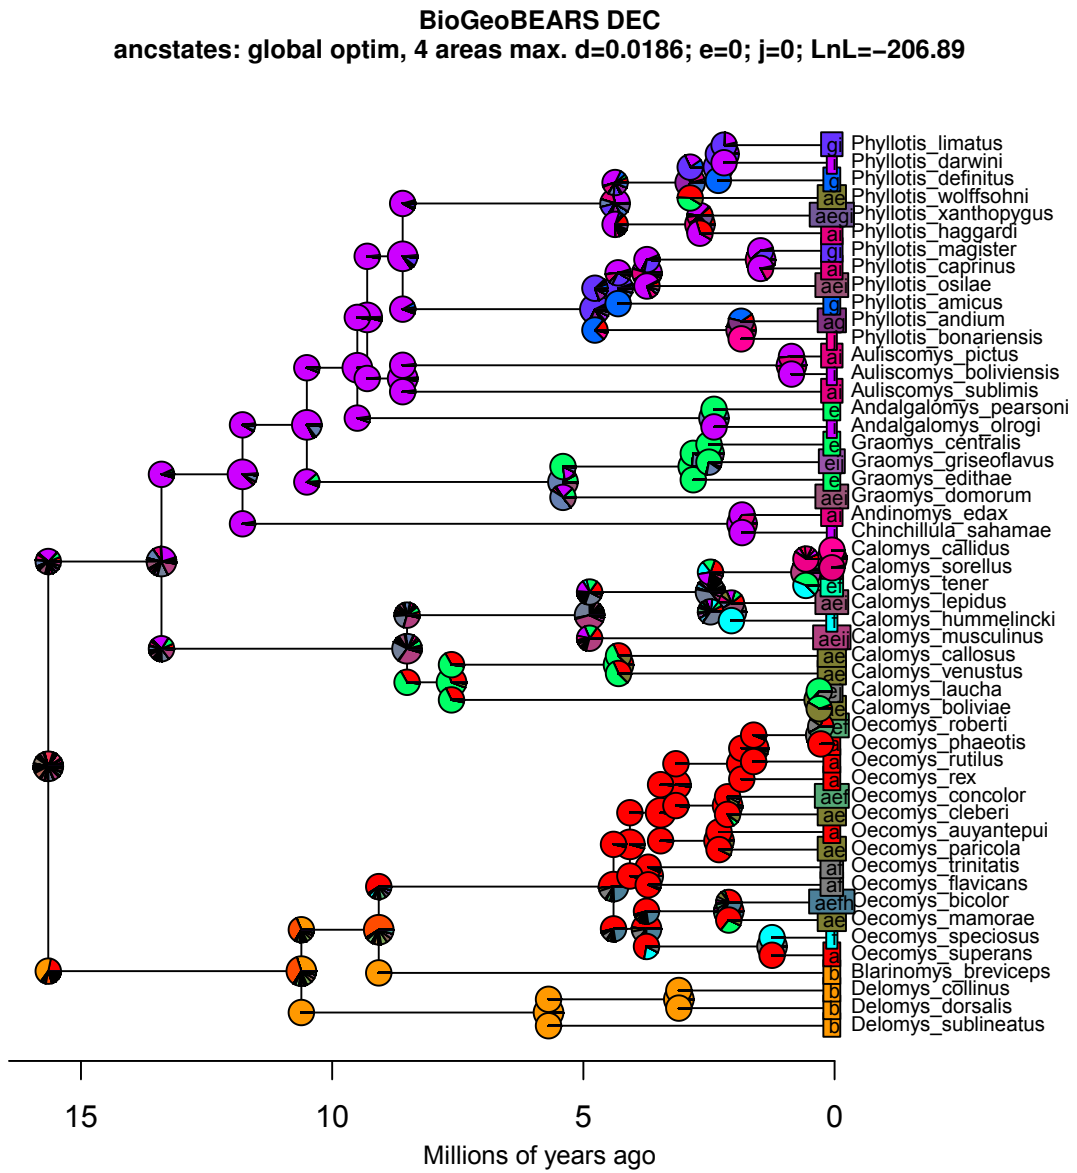

Figure S7: Clades of mammals

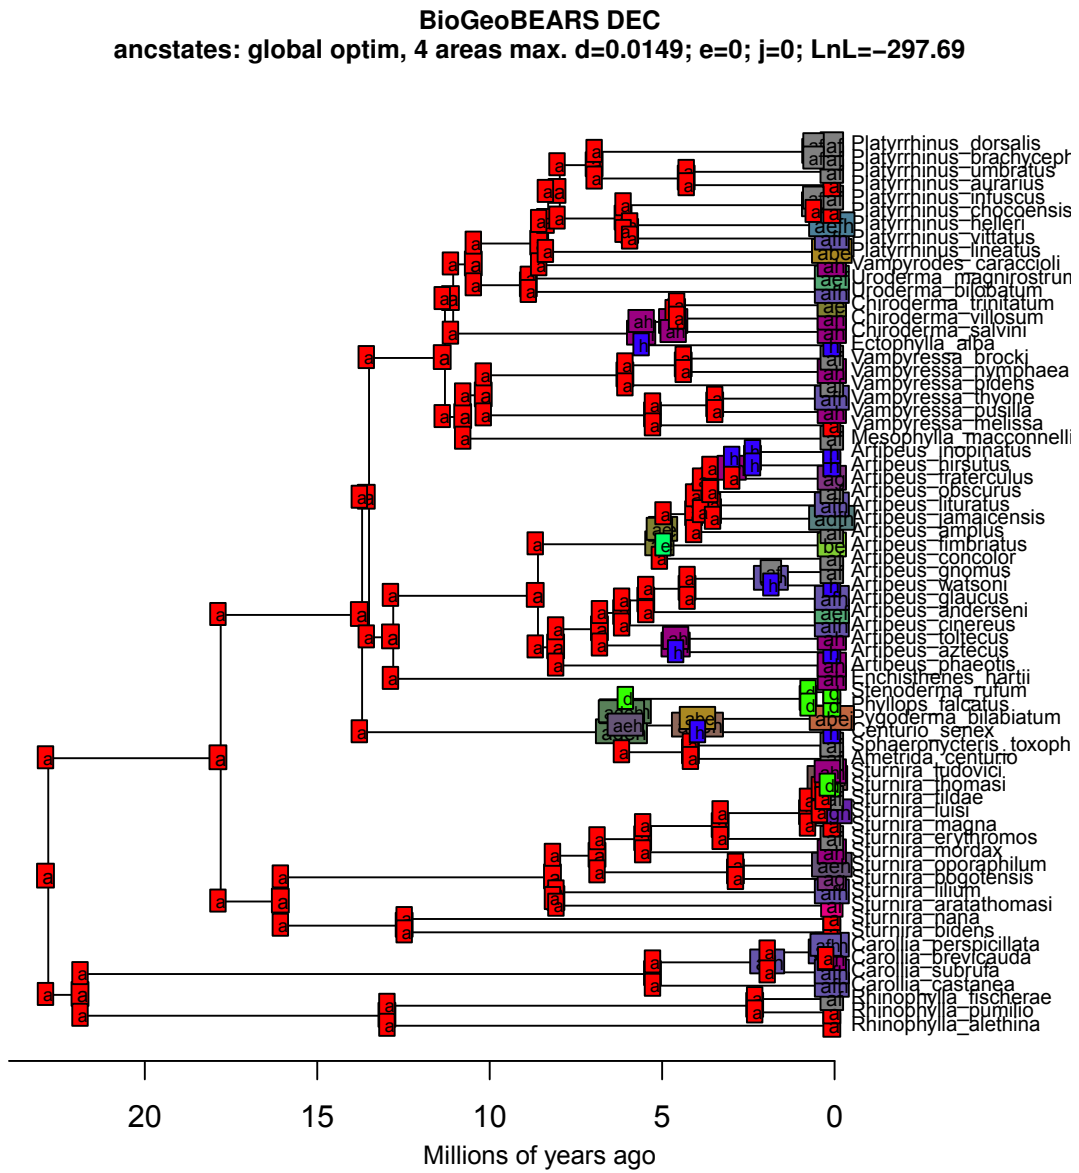

Figure S7: Clades of mammals

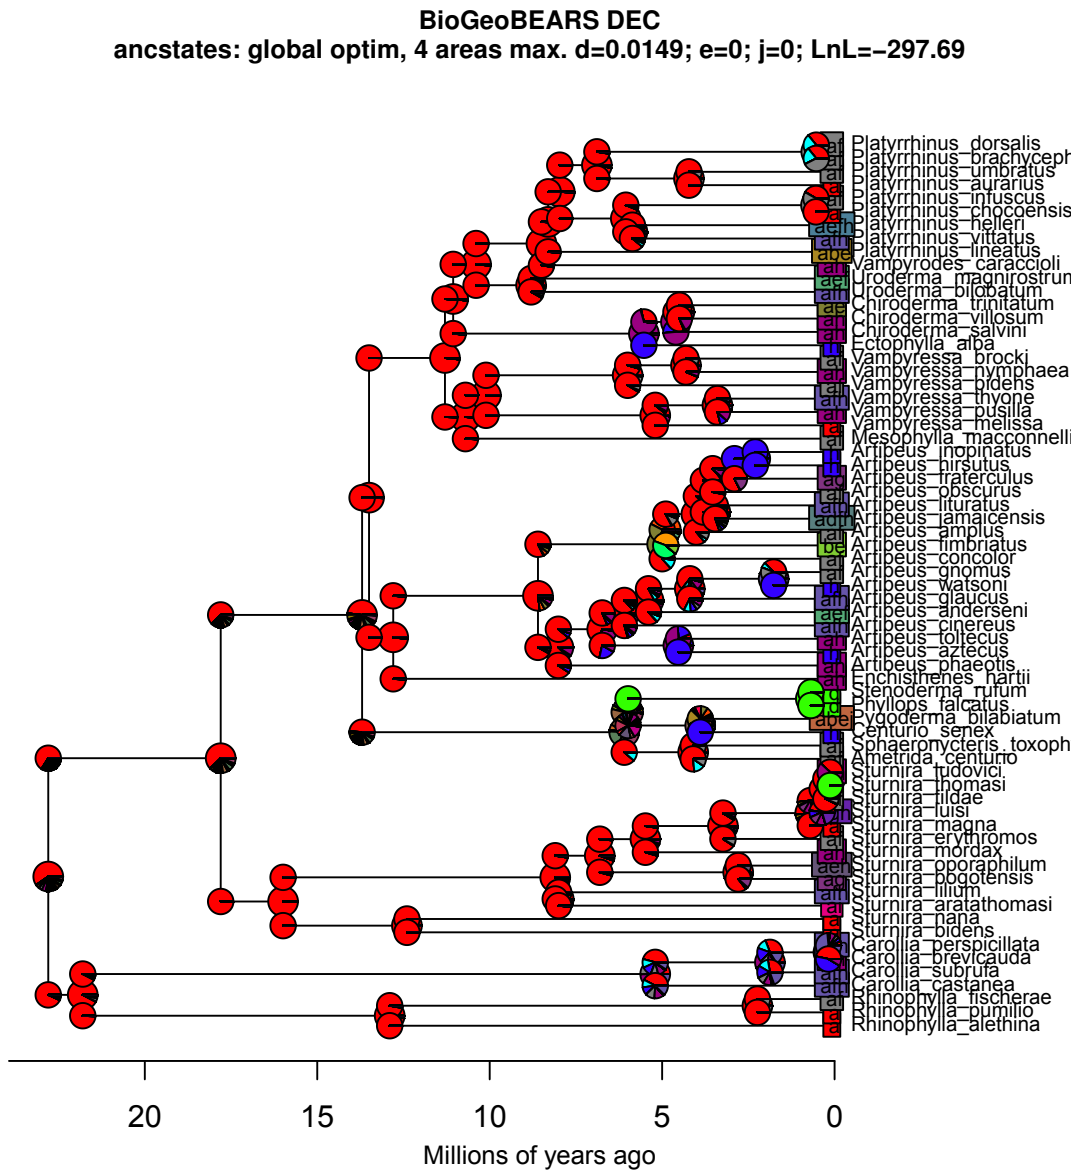

Figure S7: Clades of mammals

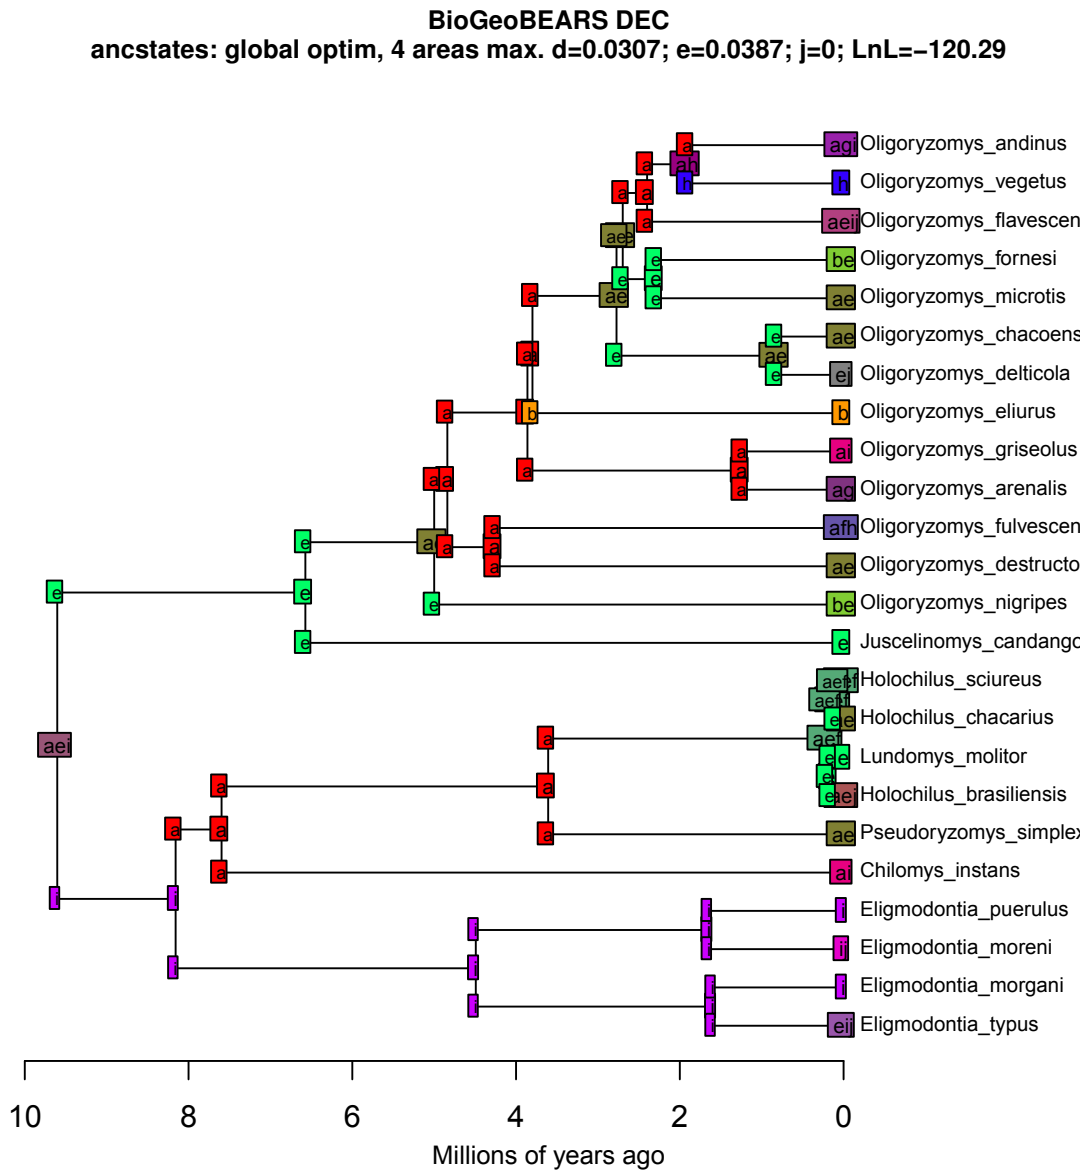



Figure S7: Clades of mammals

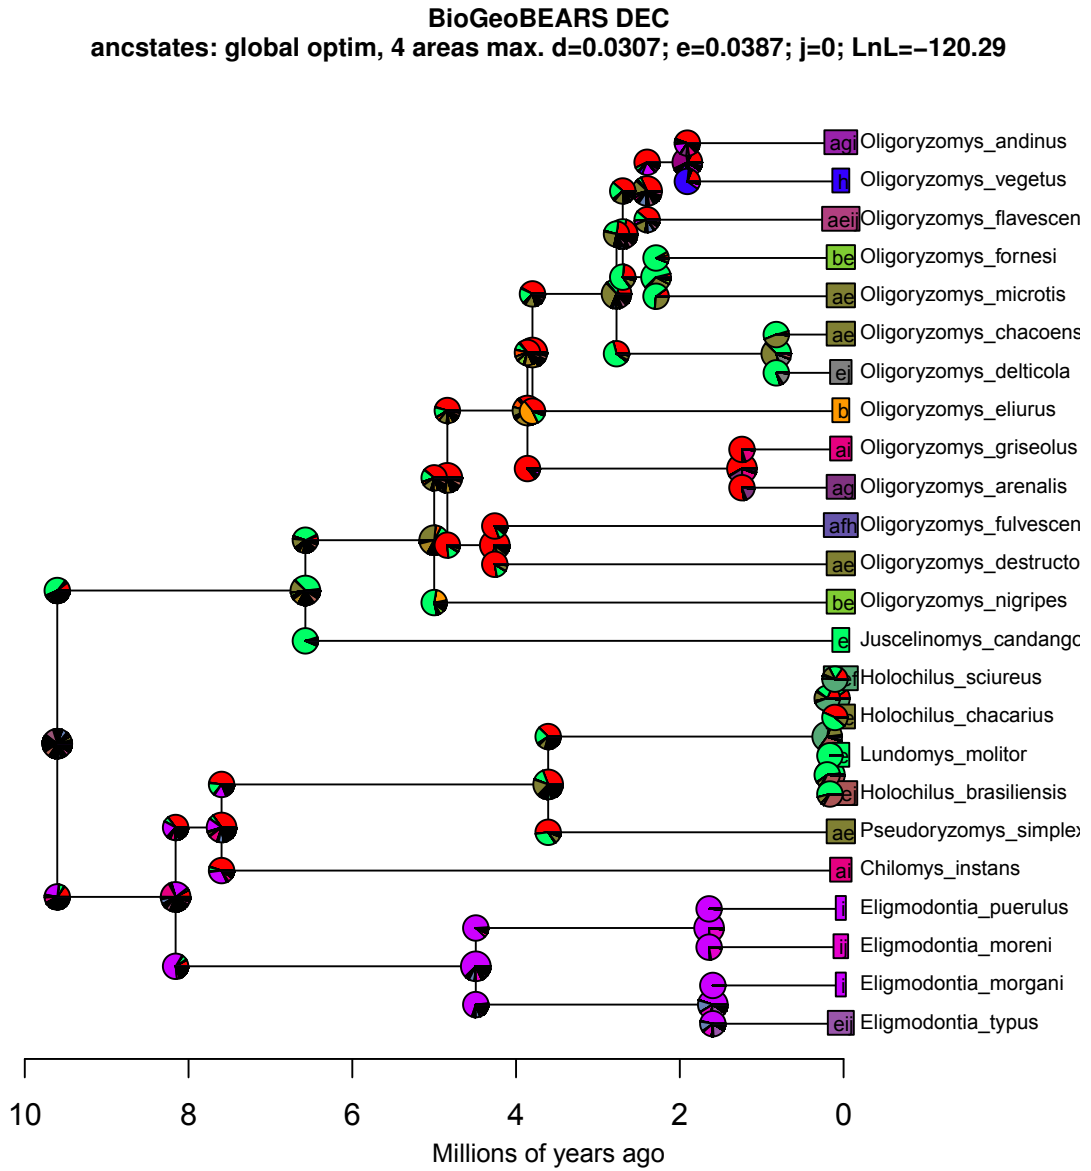

Figure S7: Clades of mammals

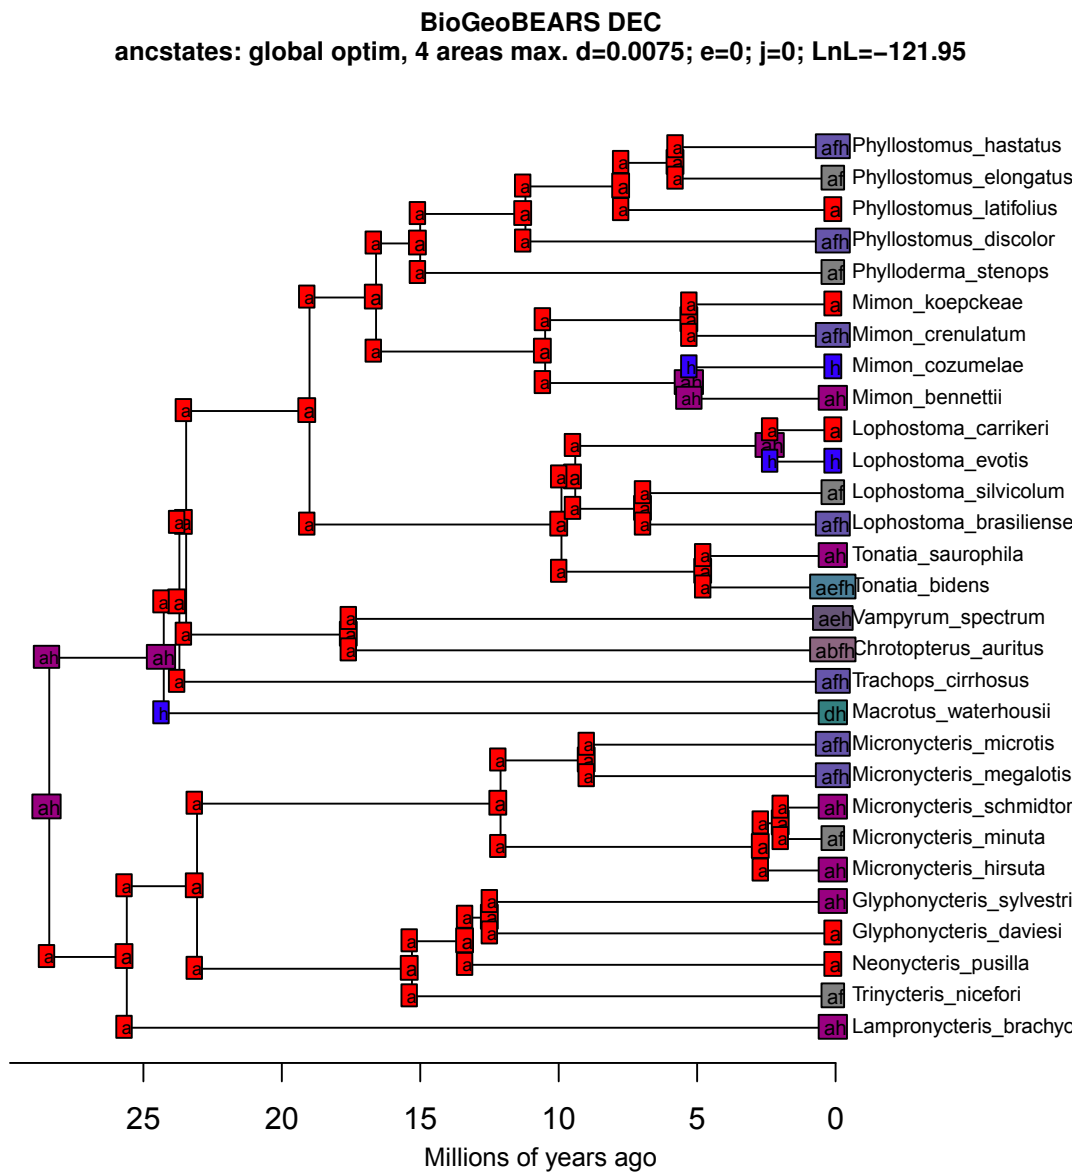

Figure S7: Clades of mammals

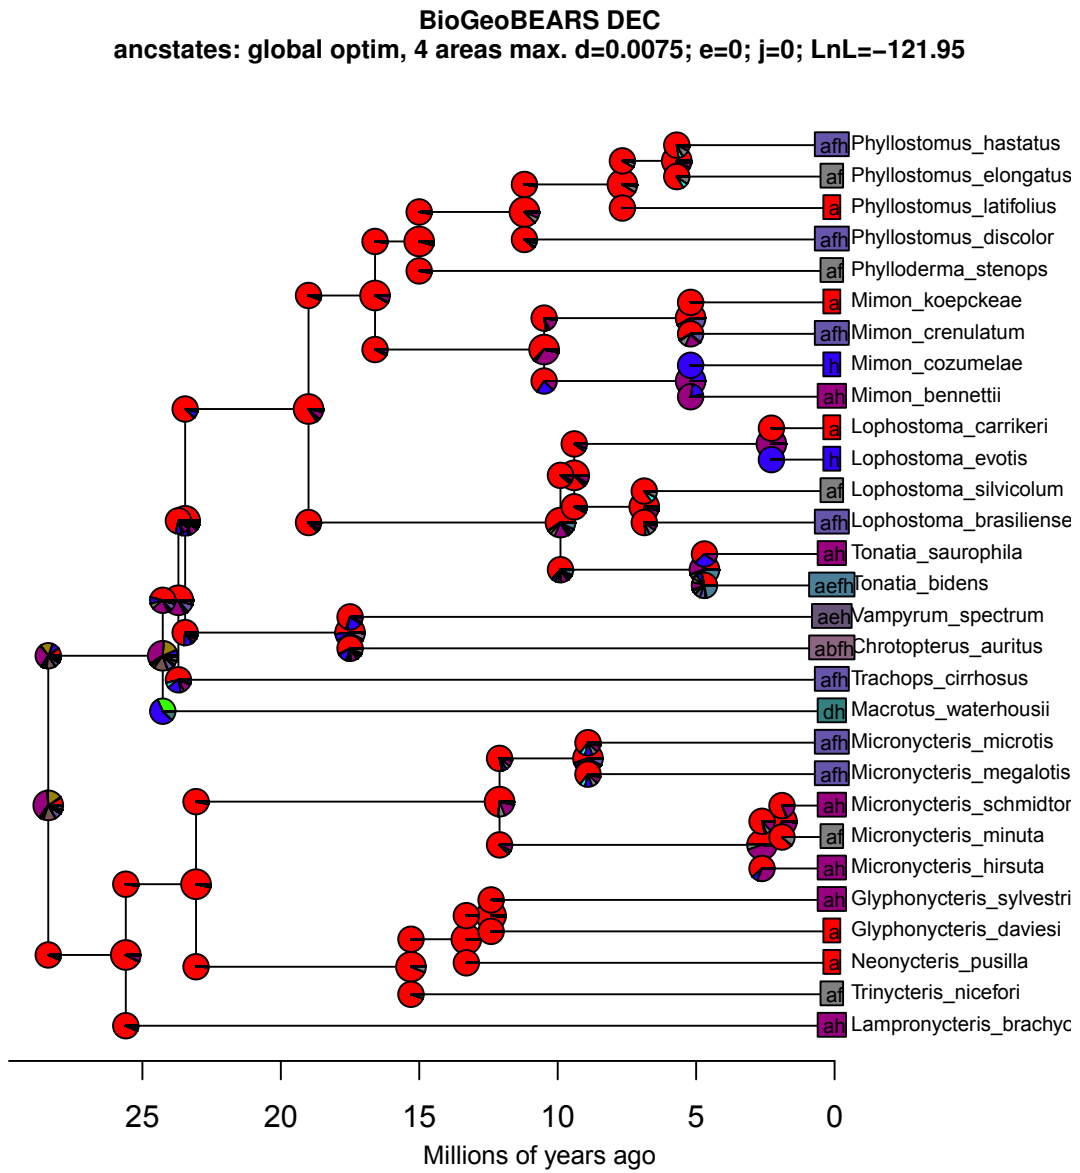

Figure S7: Clades of mammals

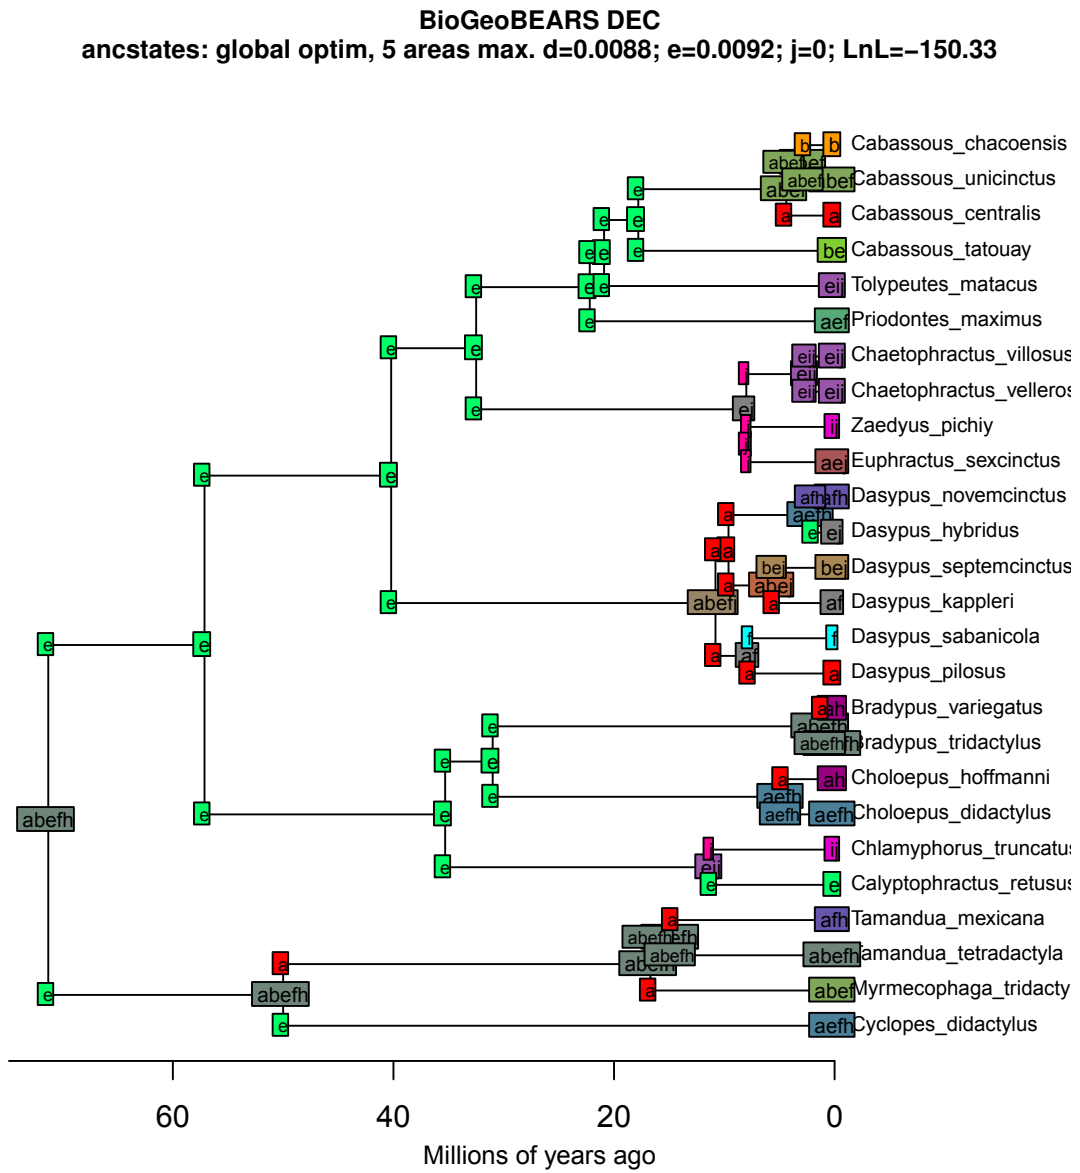

Figure S7: Clades of mammals

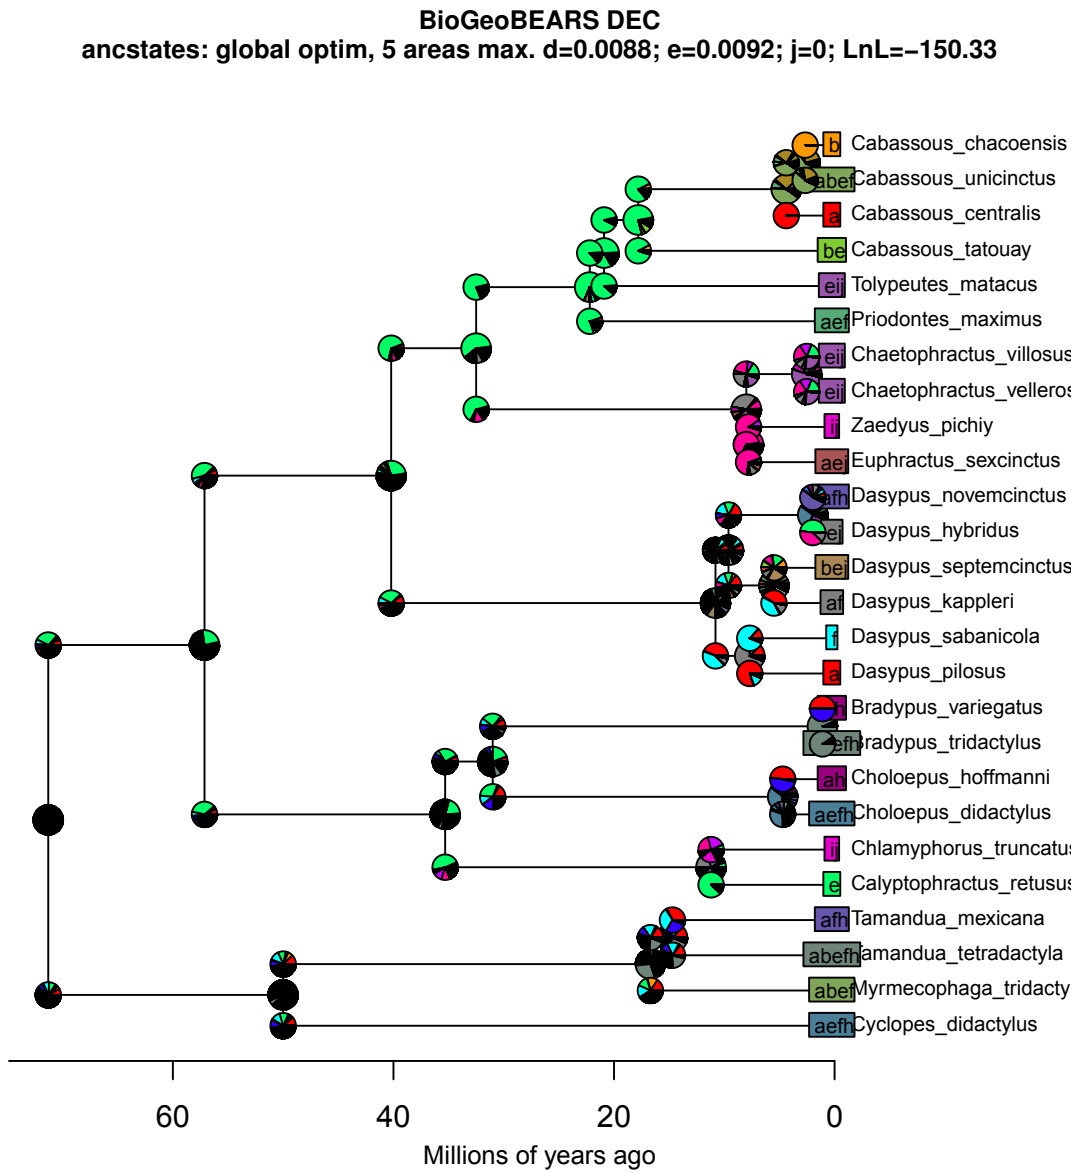

Figure S7: Clades of mammals

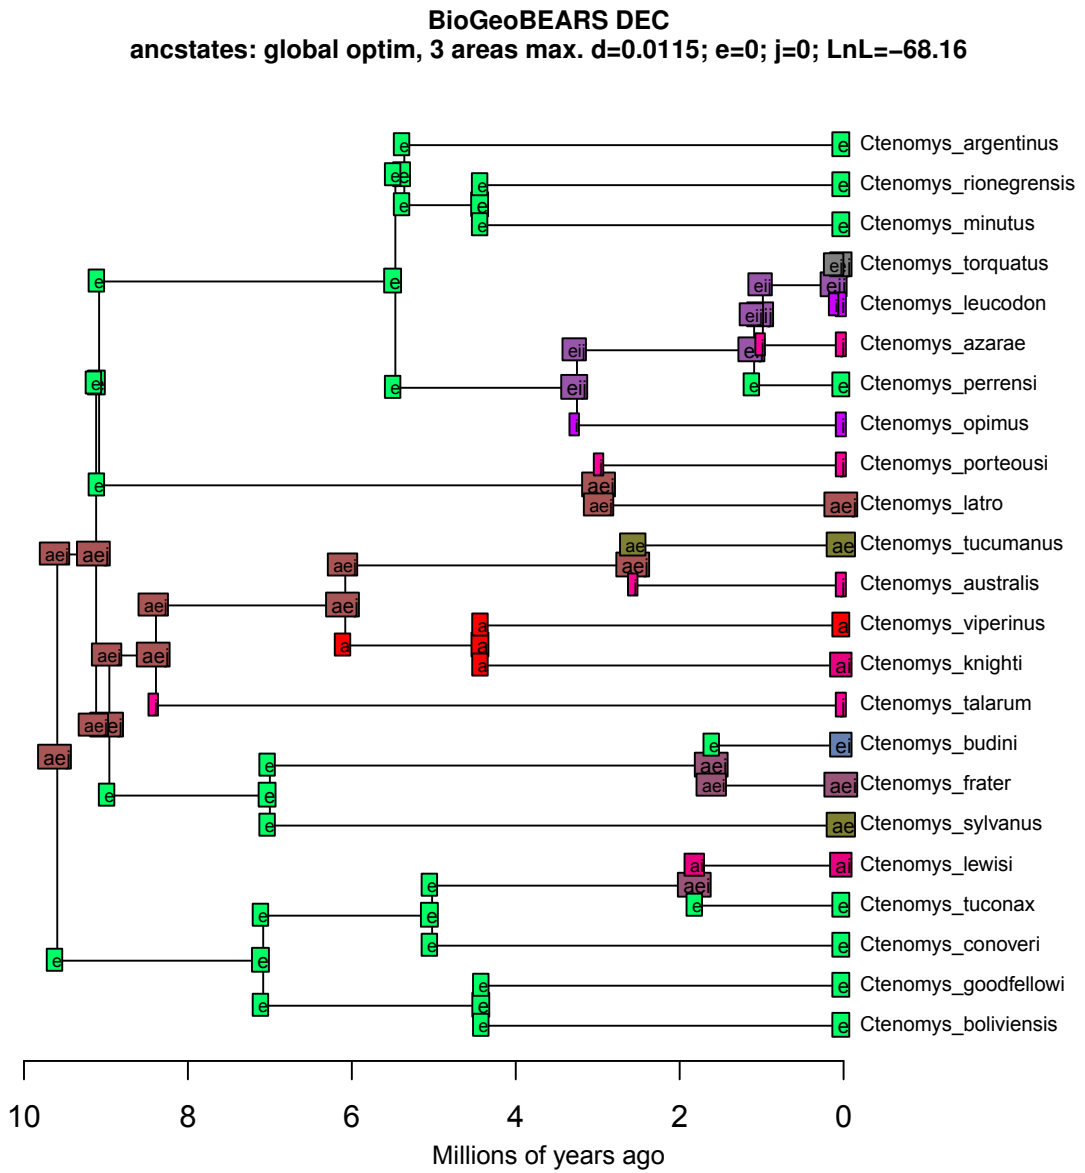

Figure S7: Clades of mammals

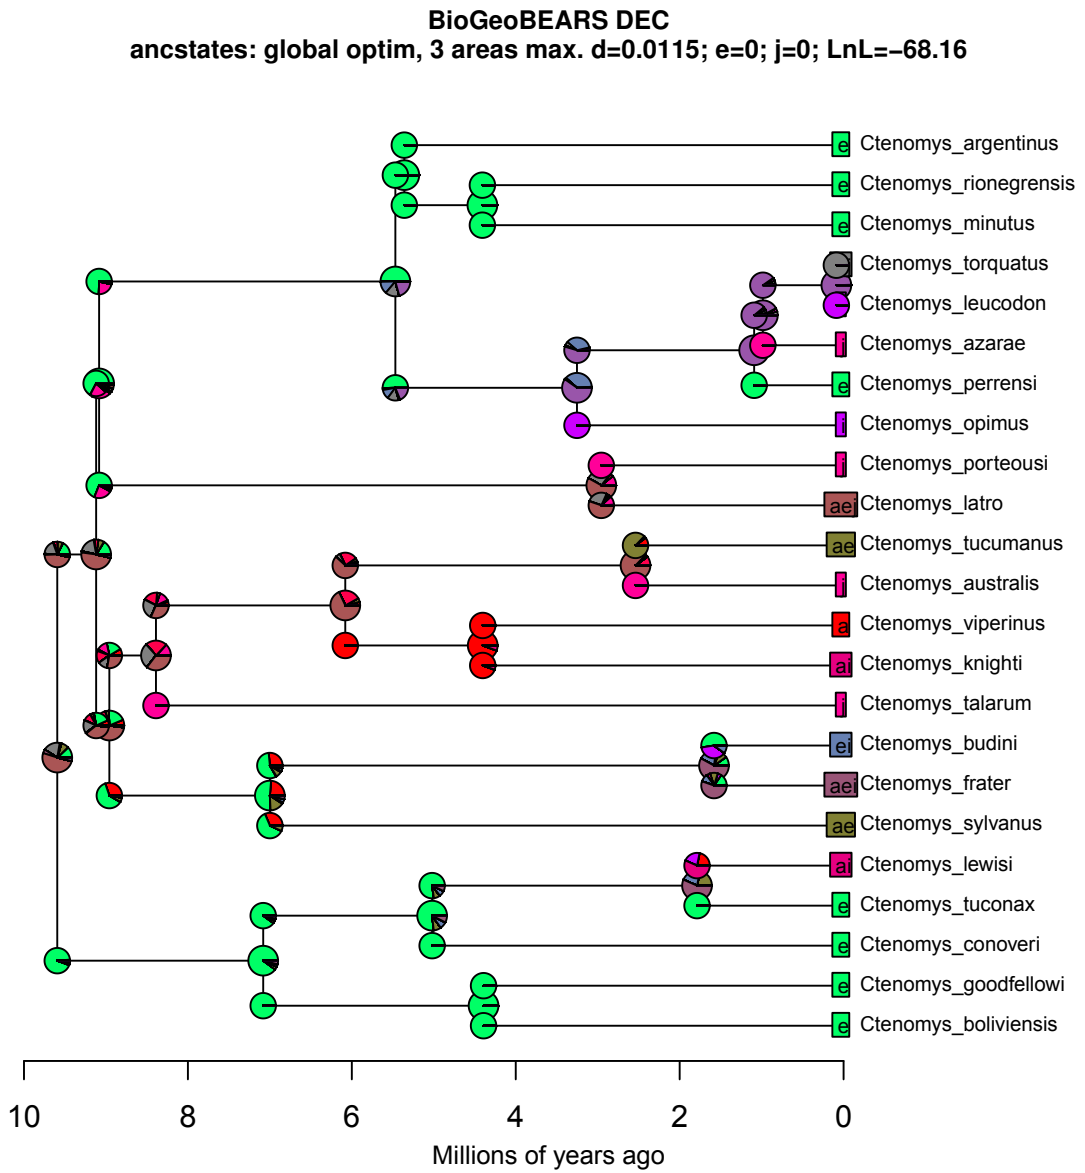

Figure S7: Clades of mammals

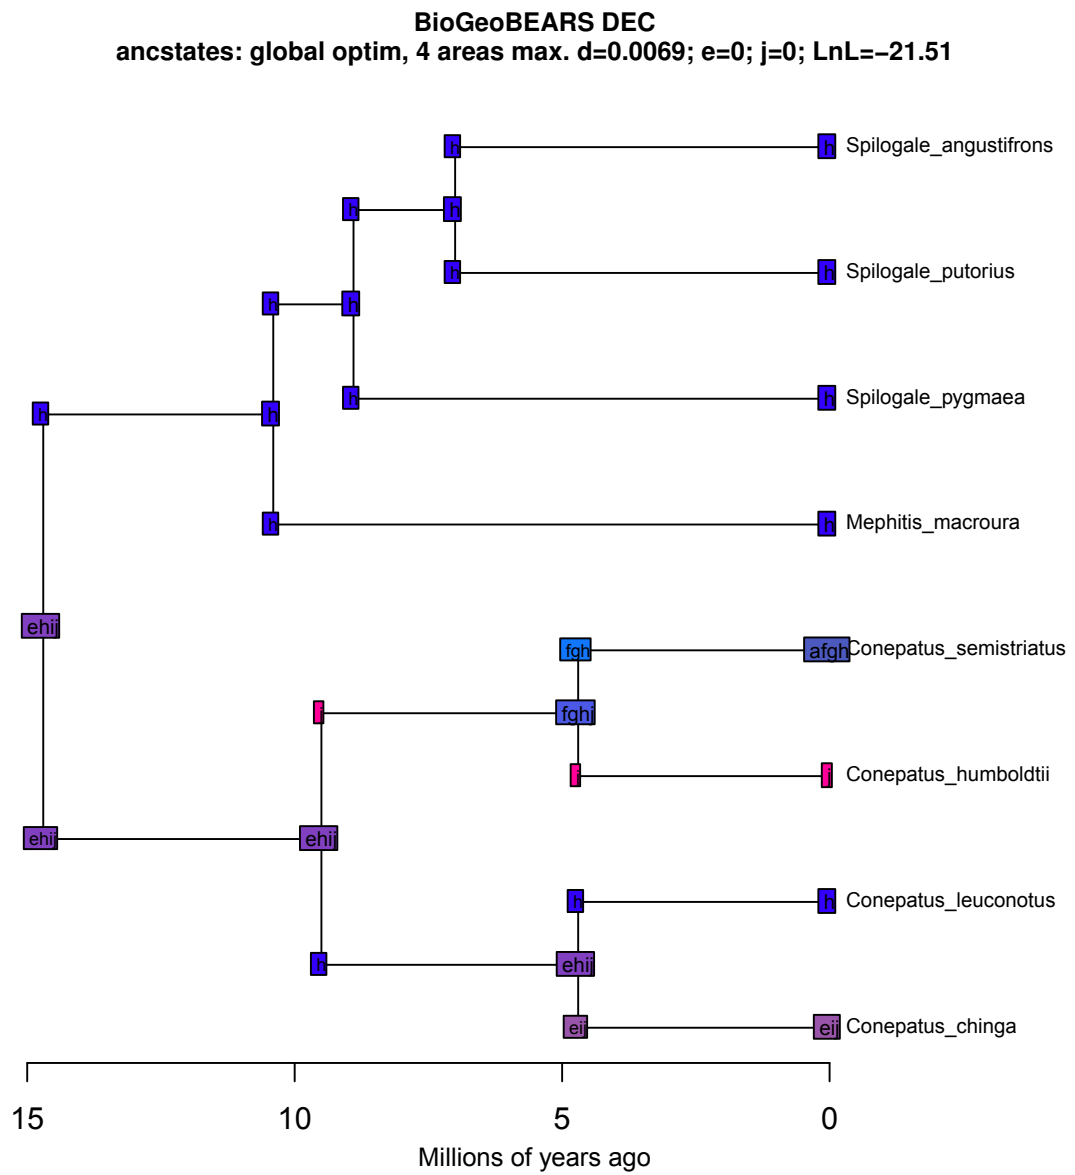



Figure S7: Clades of mammals

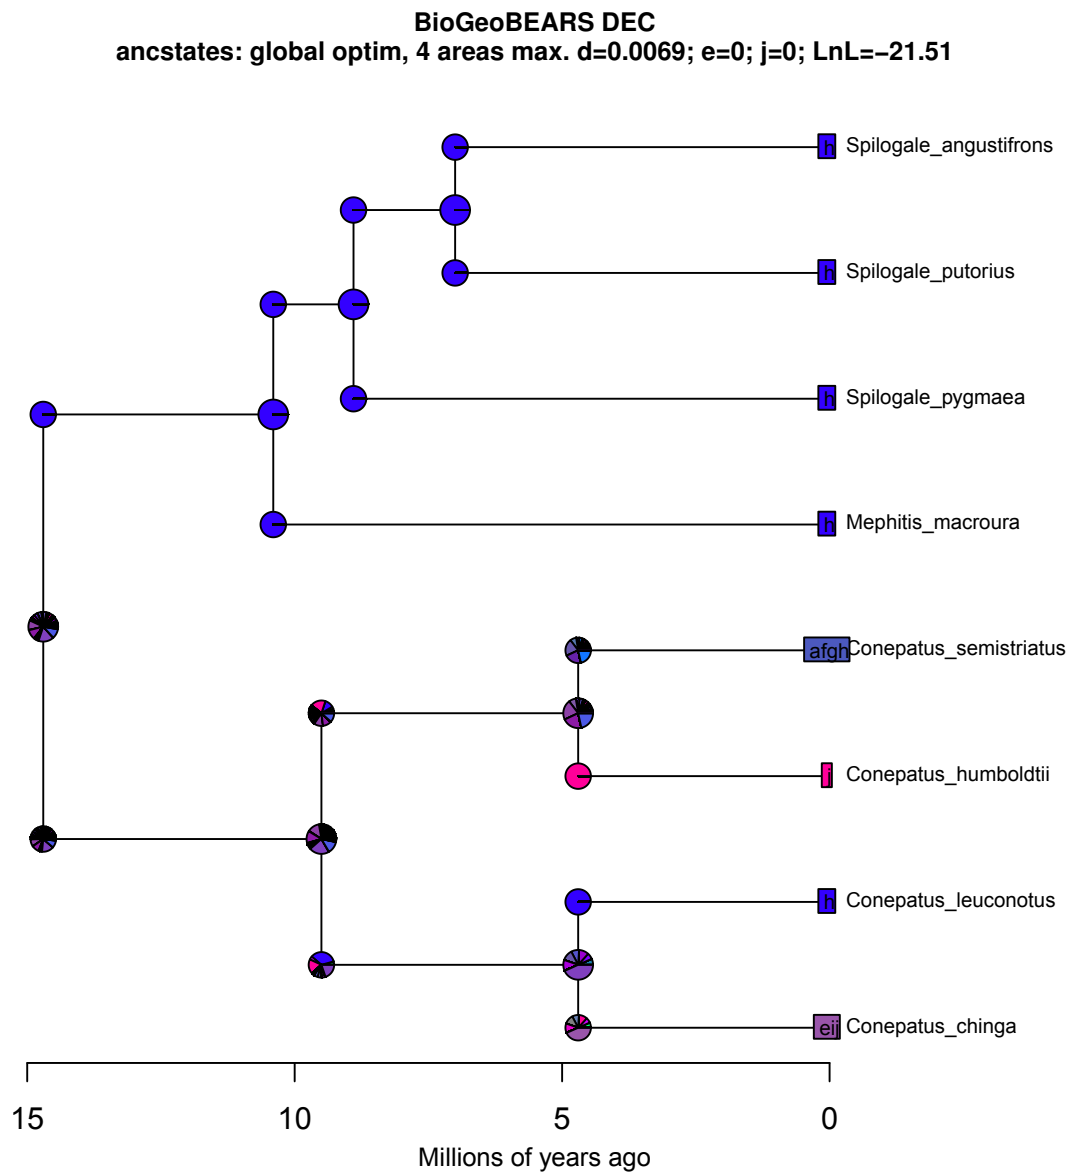

Figure S8: Clades of squamates

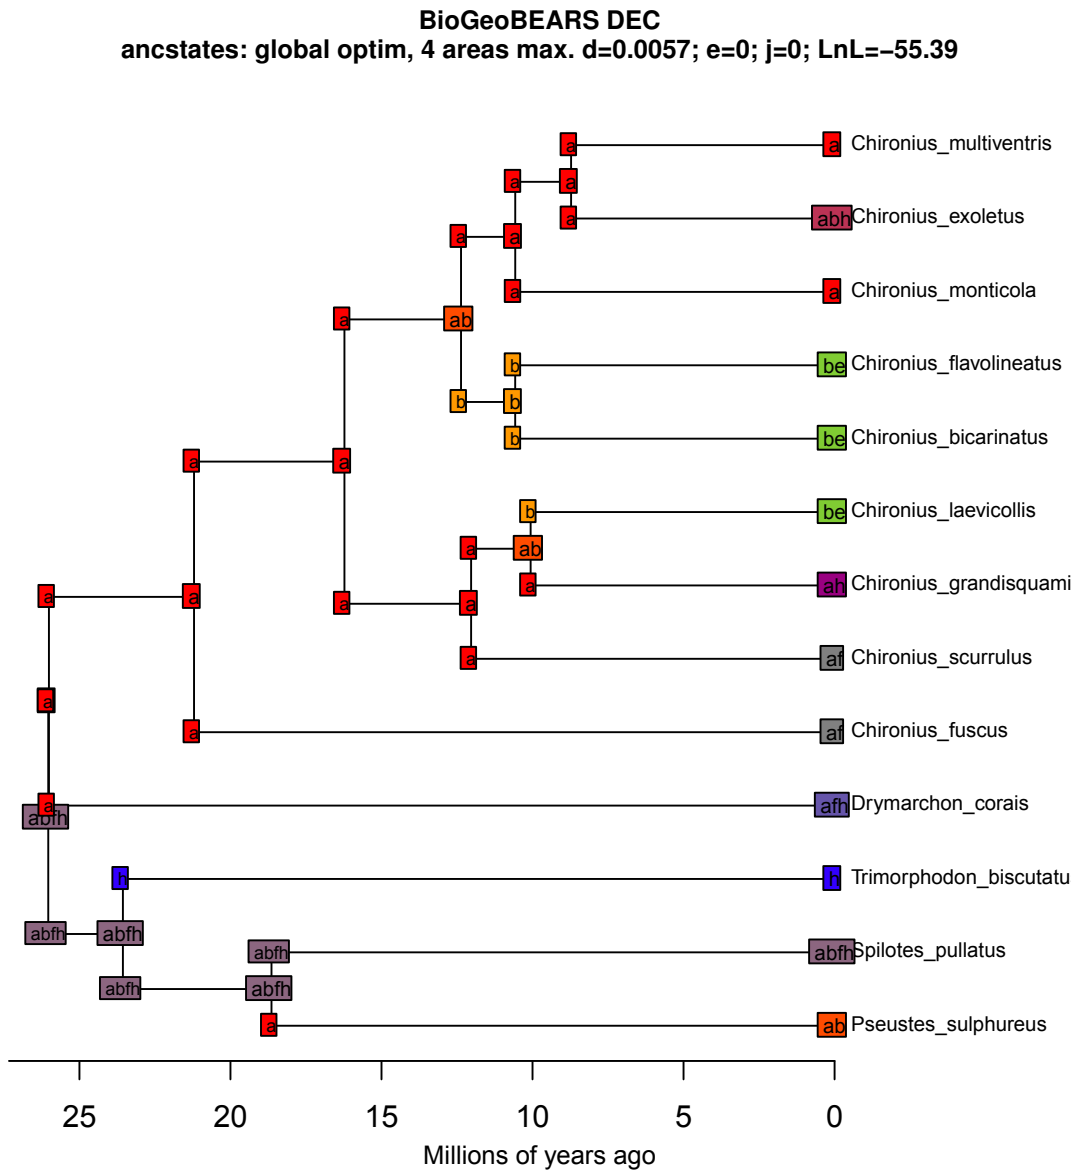

Figure S8: Clades of squamates

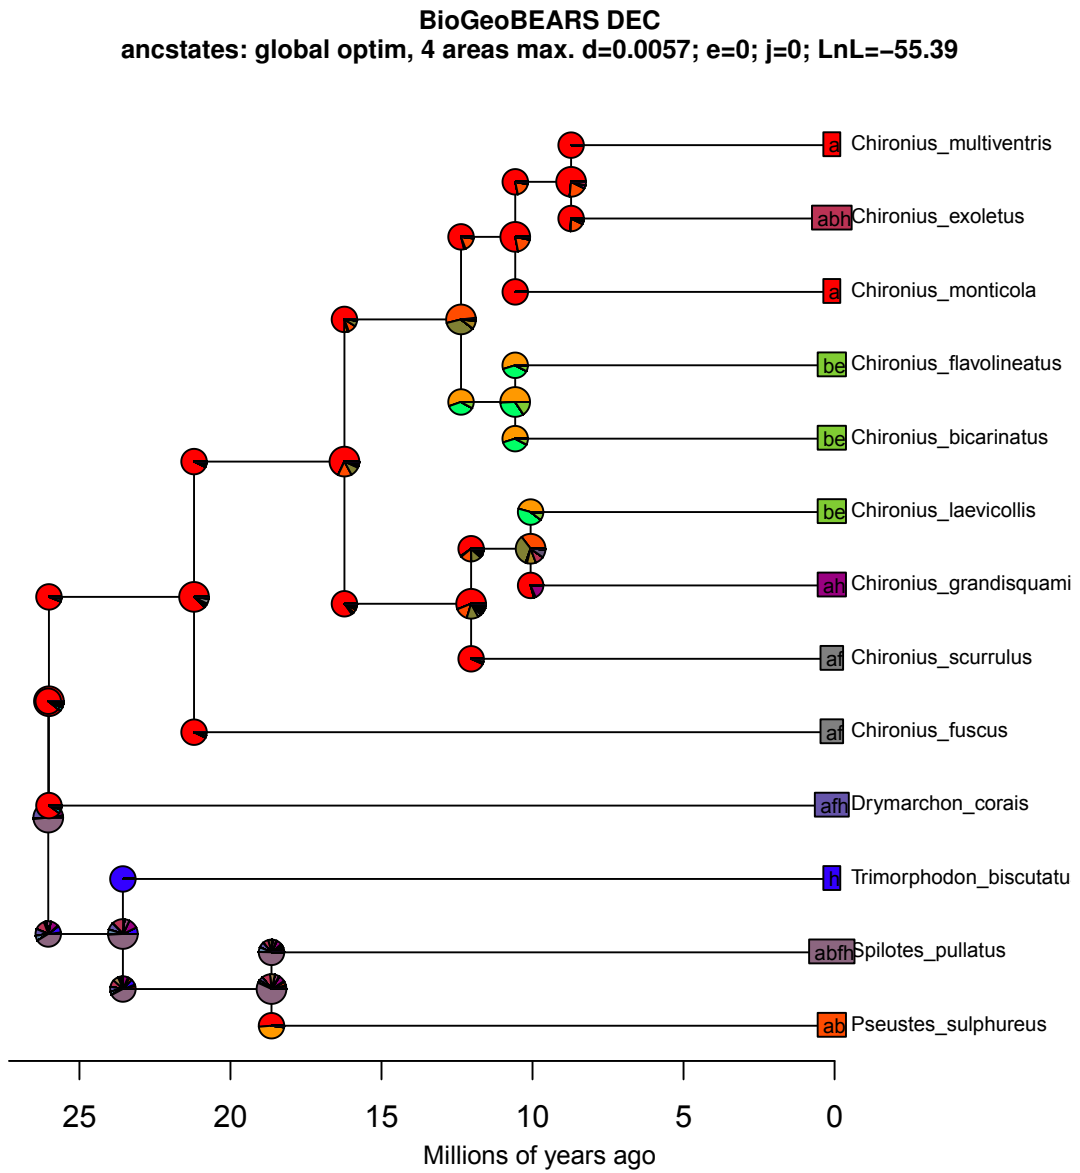

Figure S8: Clades of squamates

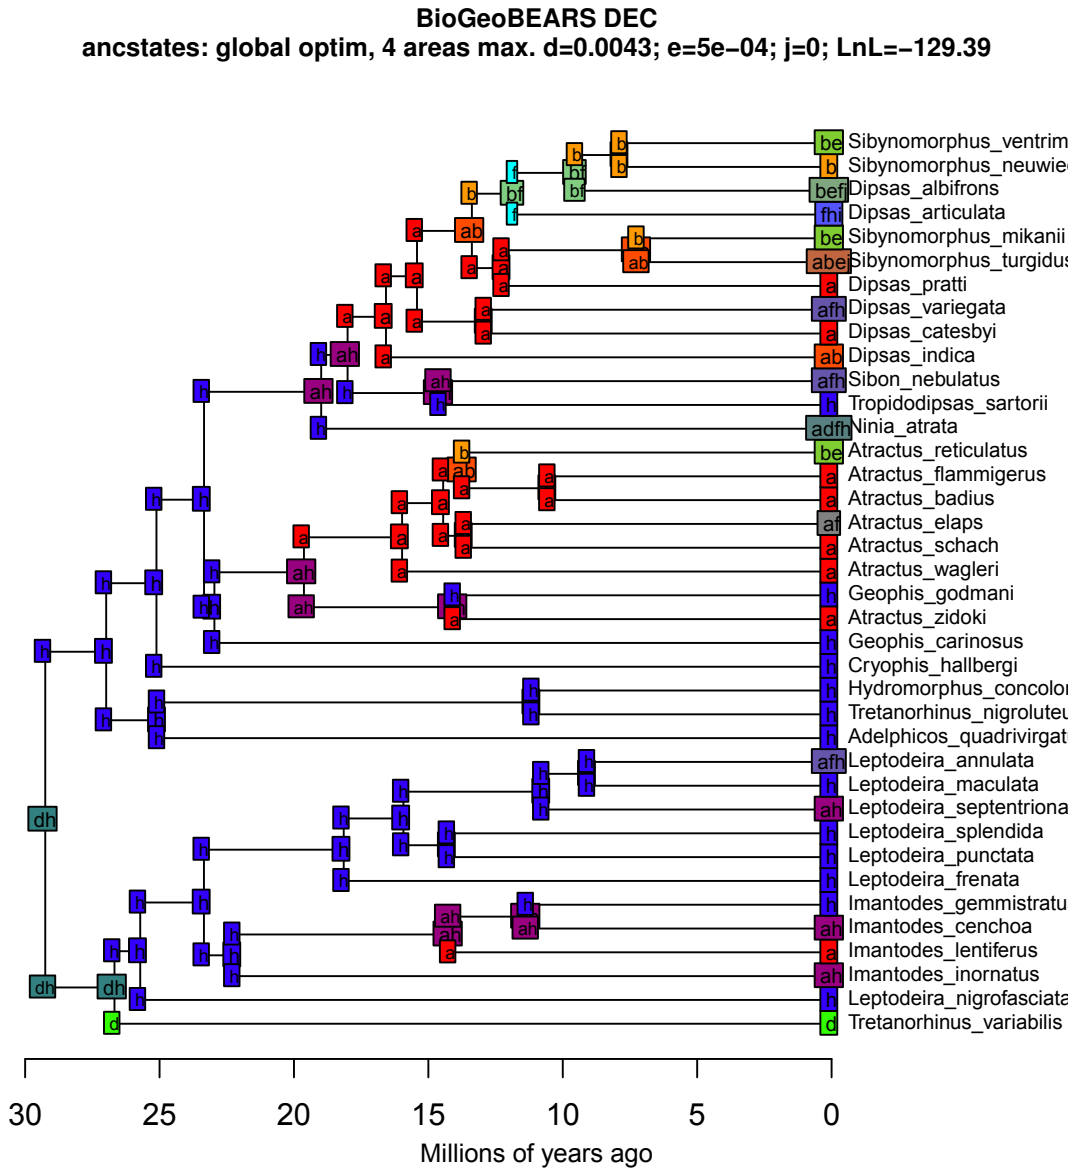

Figure S8: Clades of squamates

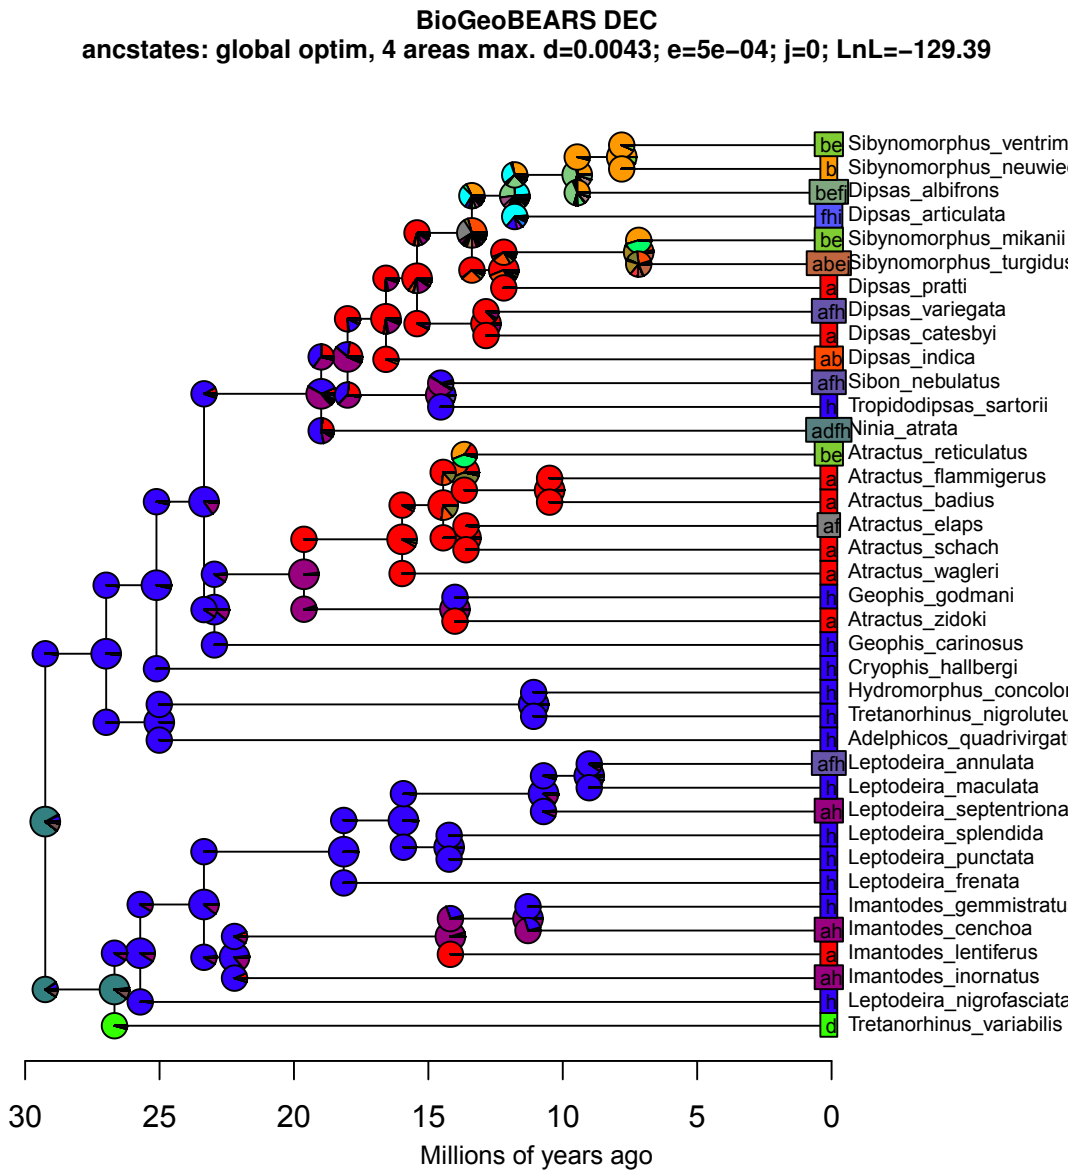

Figure S8: Clades of squamates

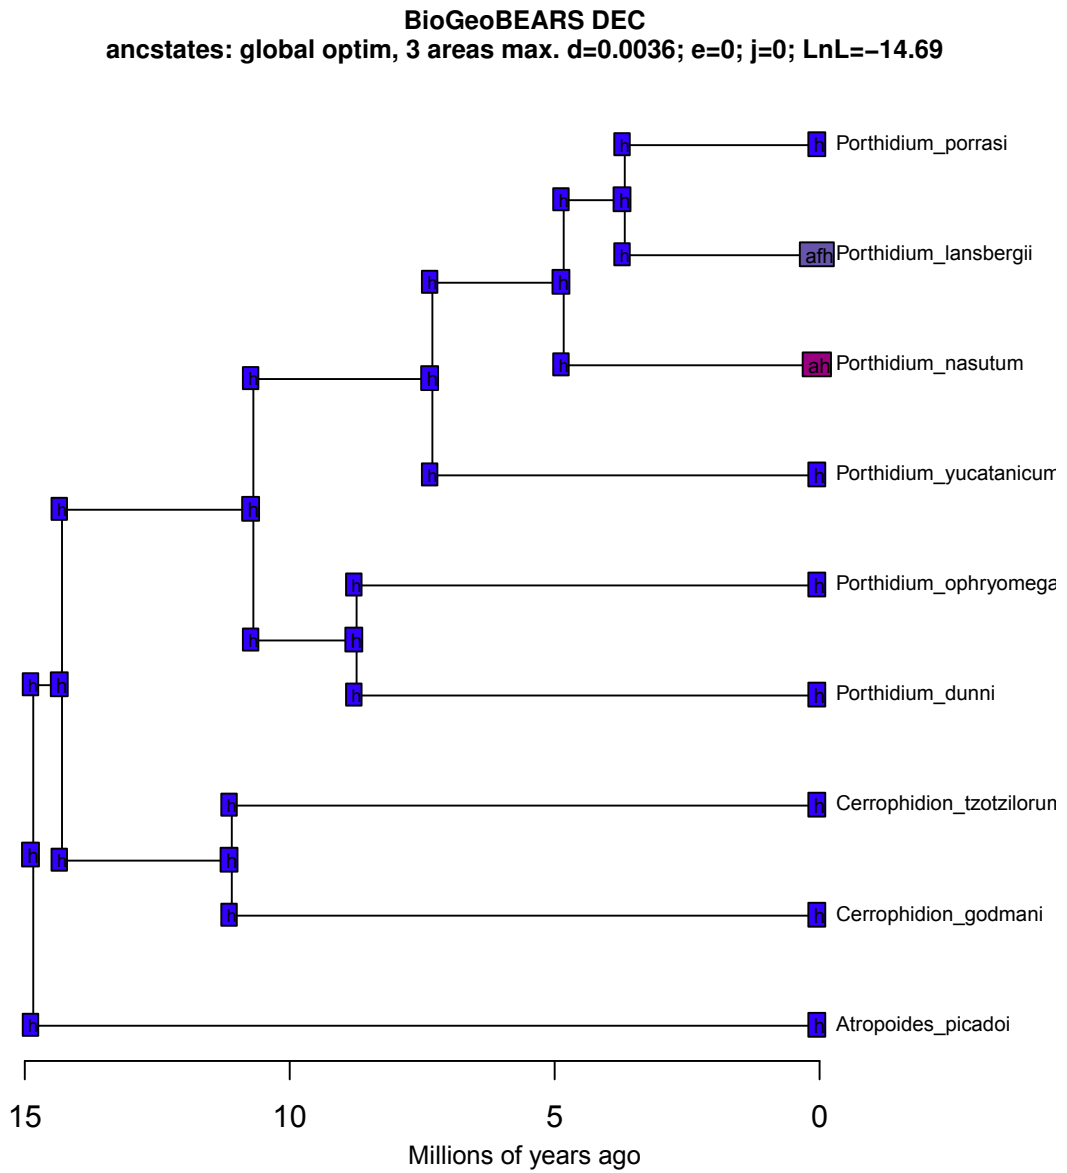

Figure S8: Clades of squamates

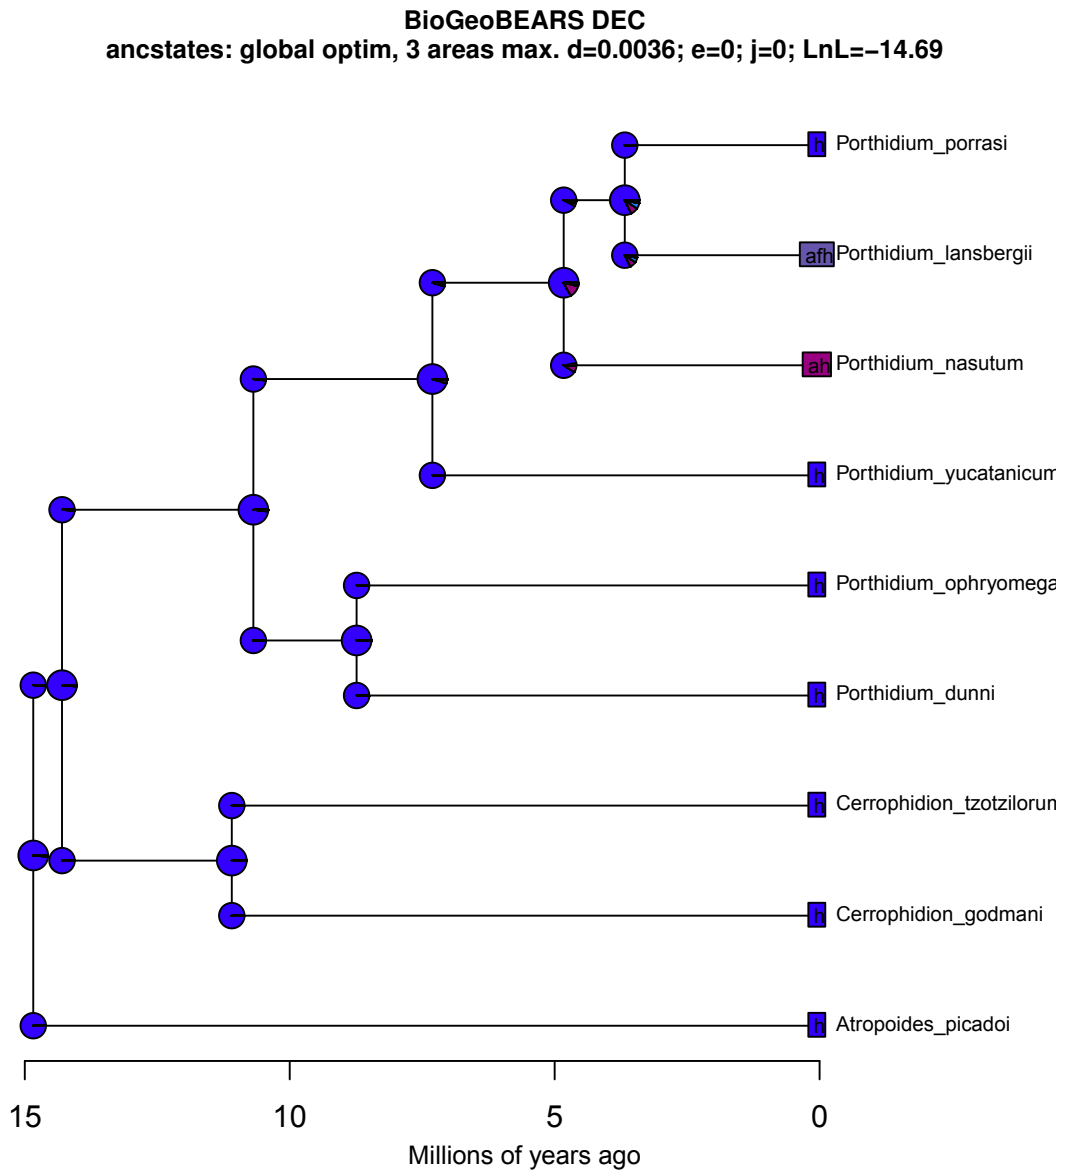

Figure S8: Clades of squamates

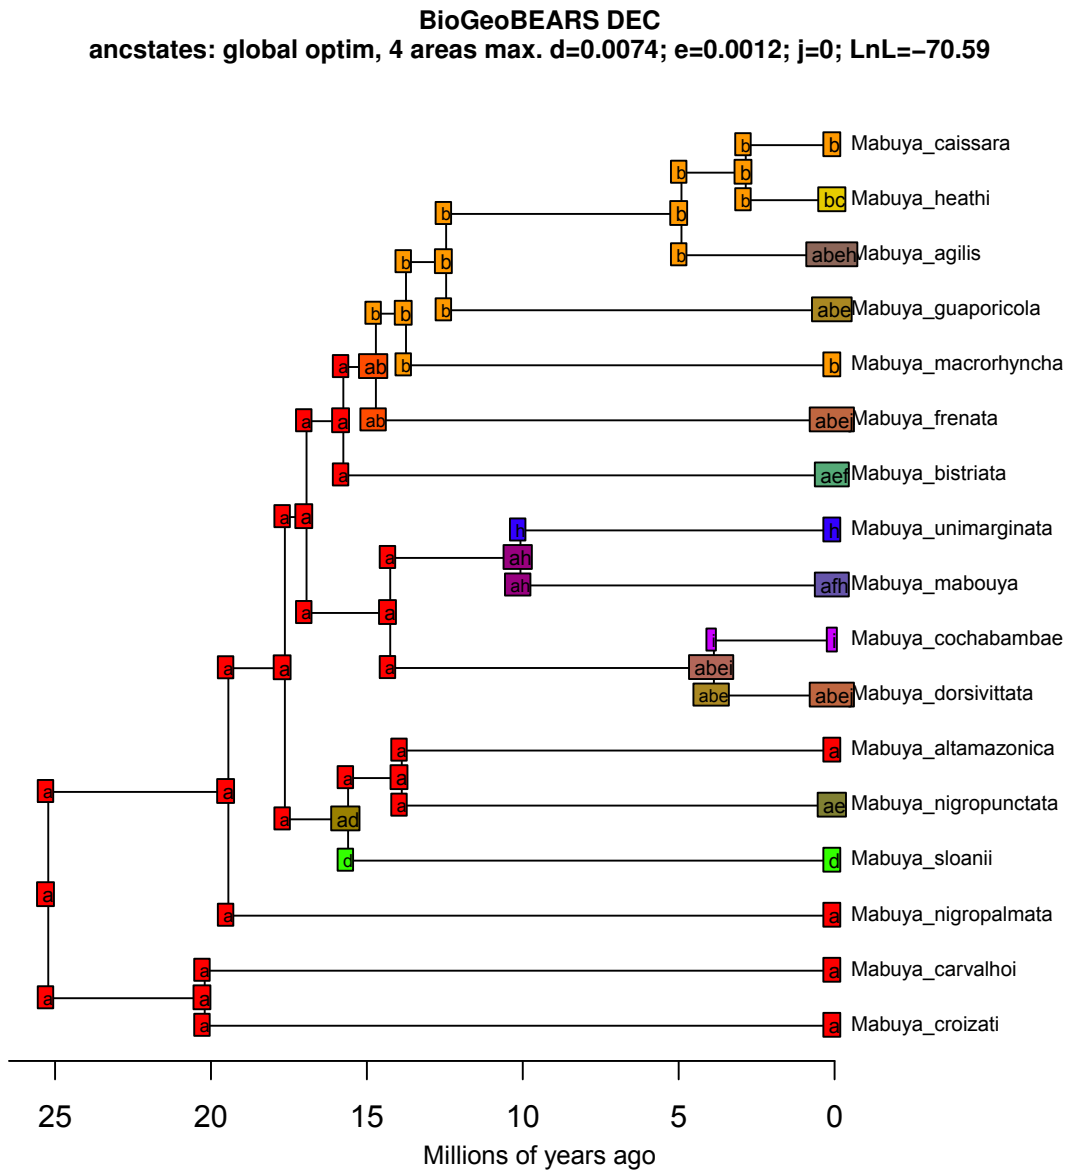



Figure S8: Clades of squamates

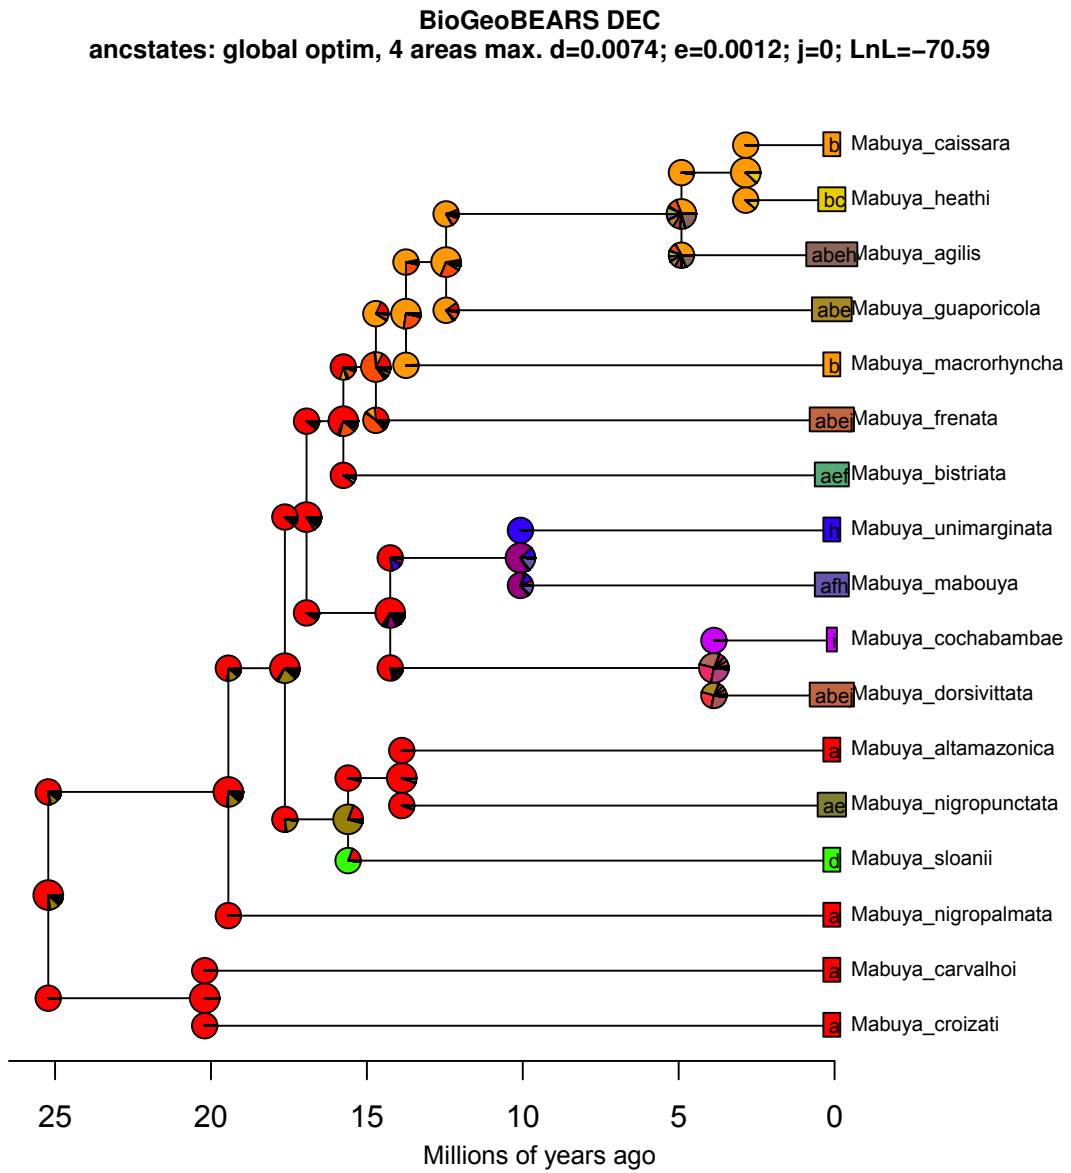

Figure S8: Clades of squamates

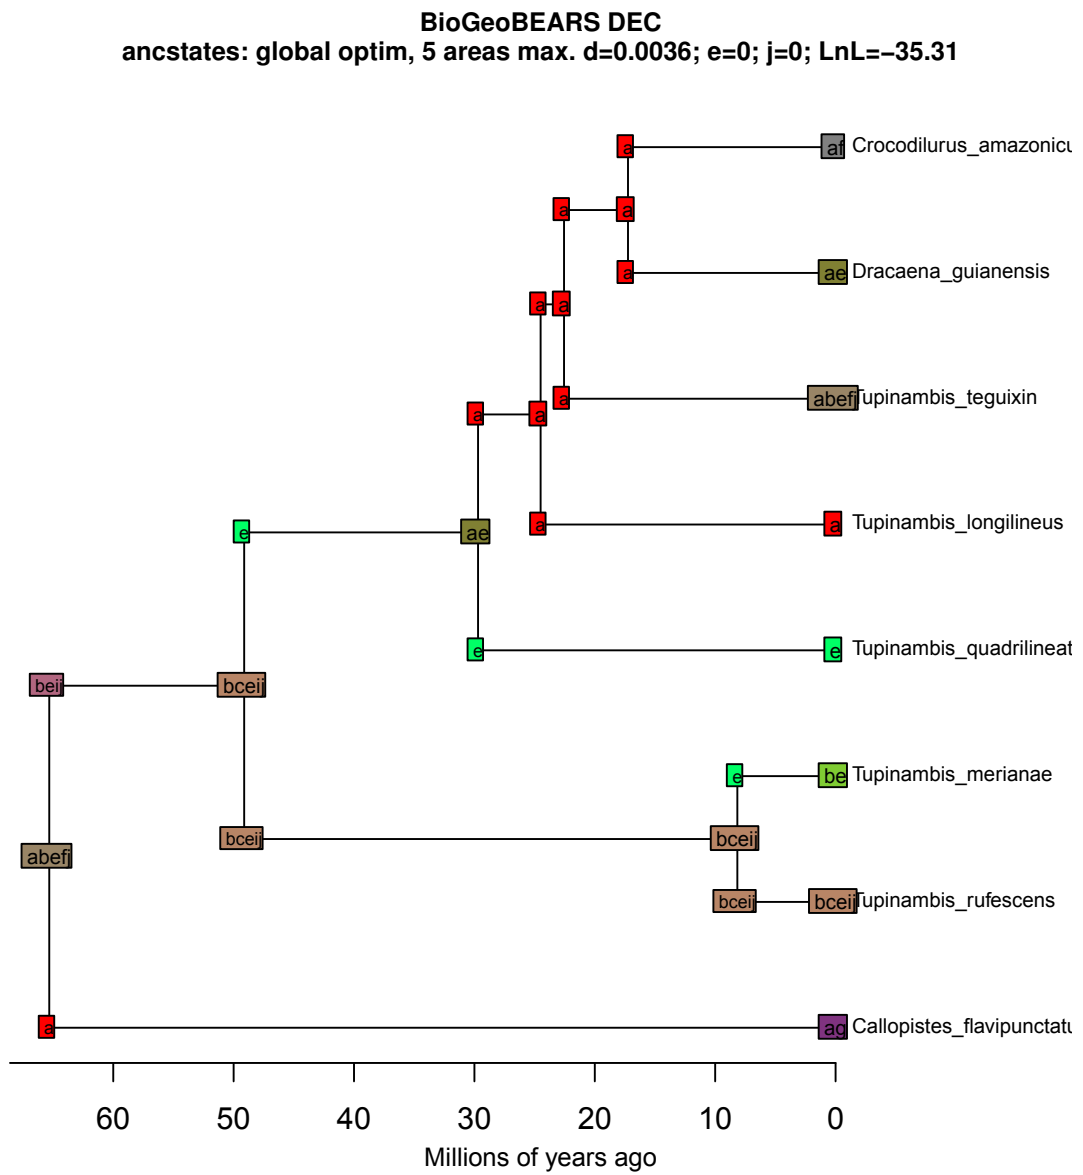

Figure S8: Clades of squamates

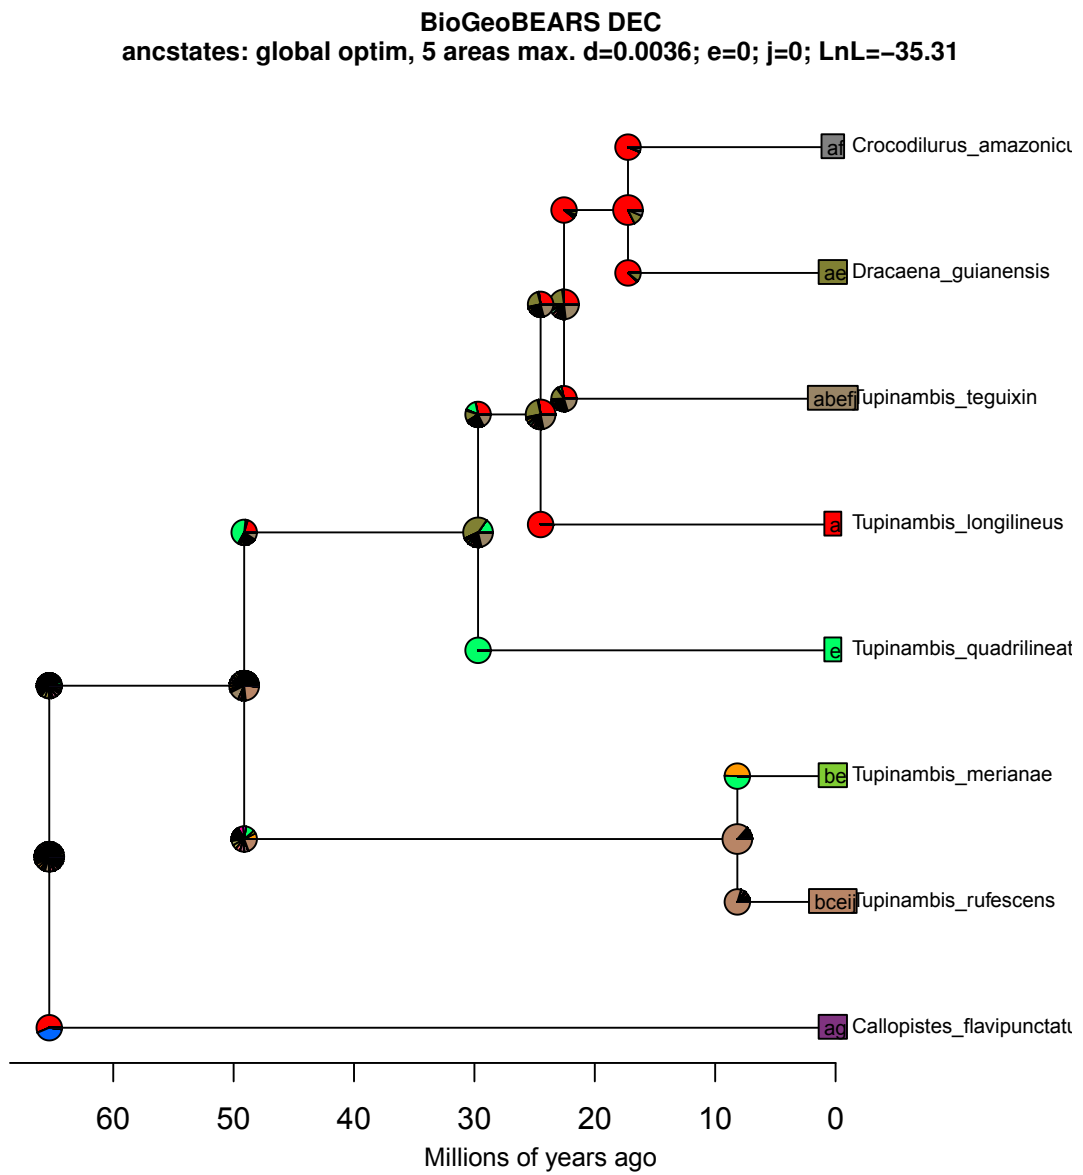

Figure S8: Clades of squamates

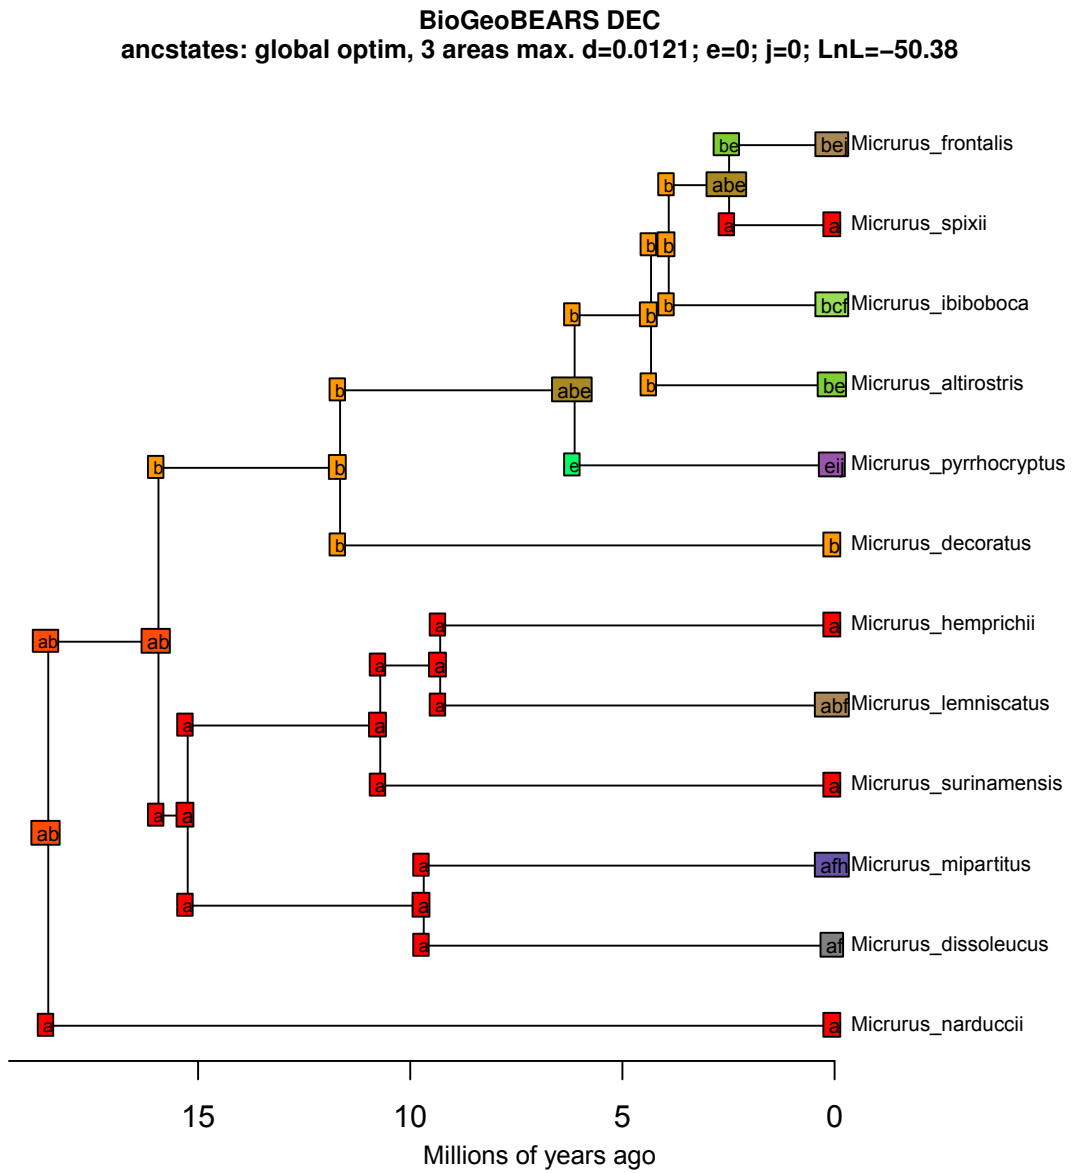

Figure S8: Clades of squamates

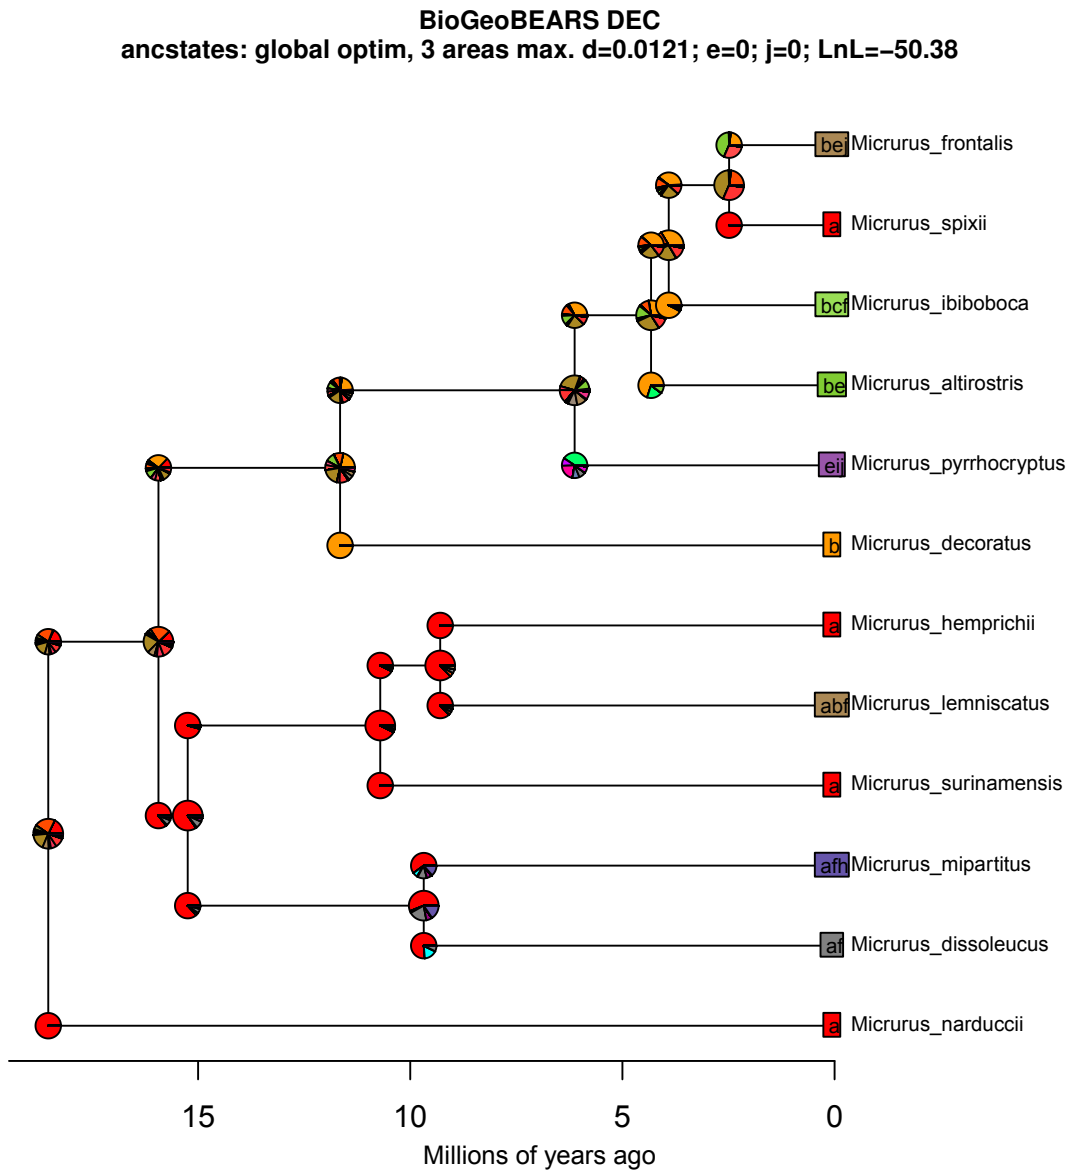

Figure S8: Clades of squamates

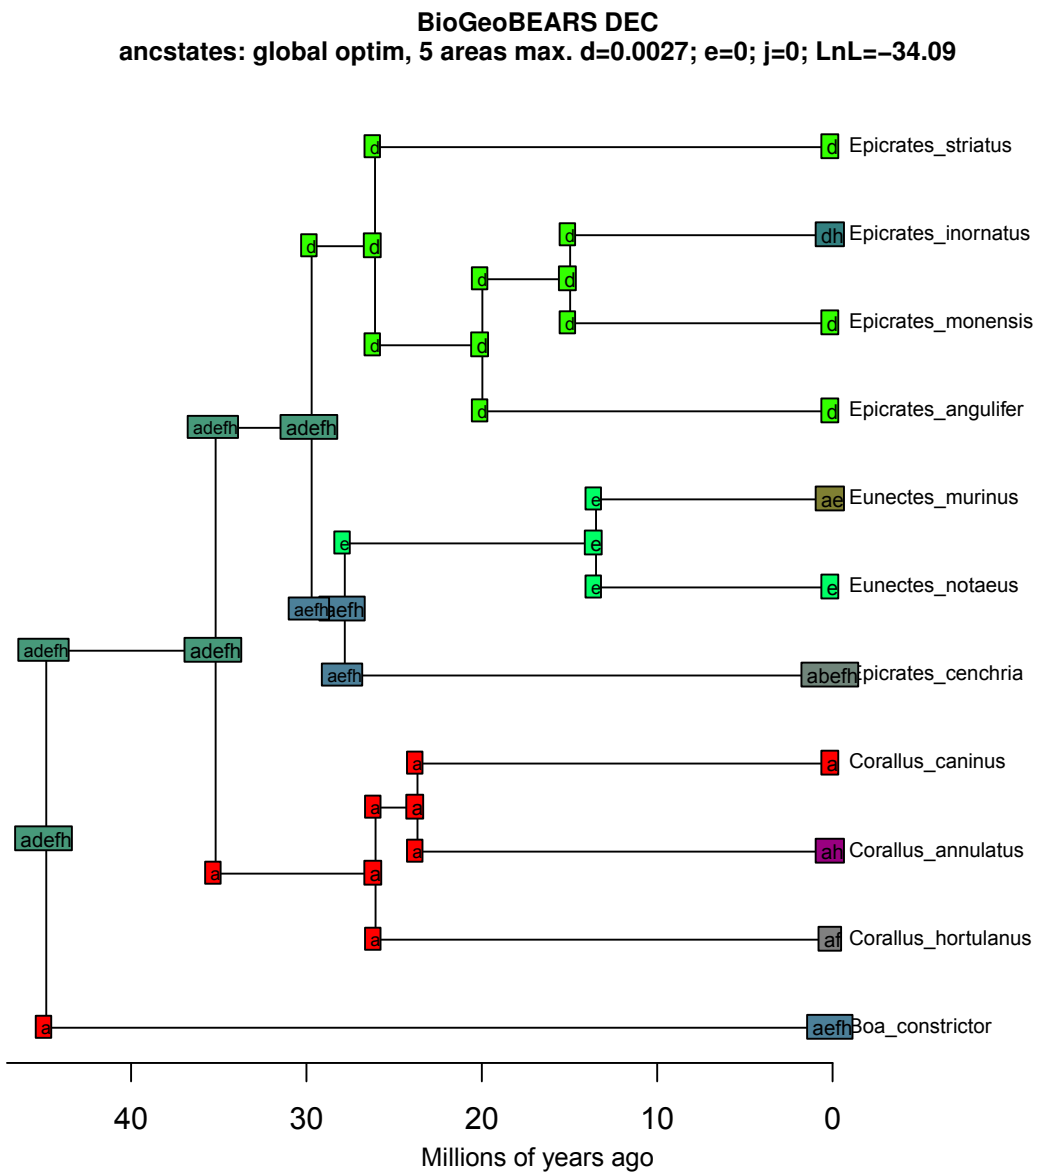

Figure S8: Clades of squamates

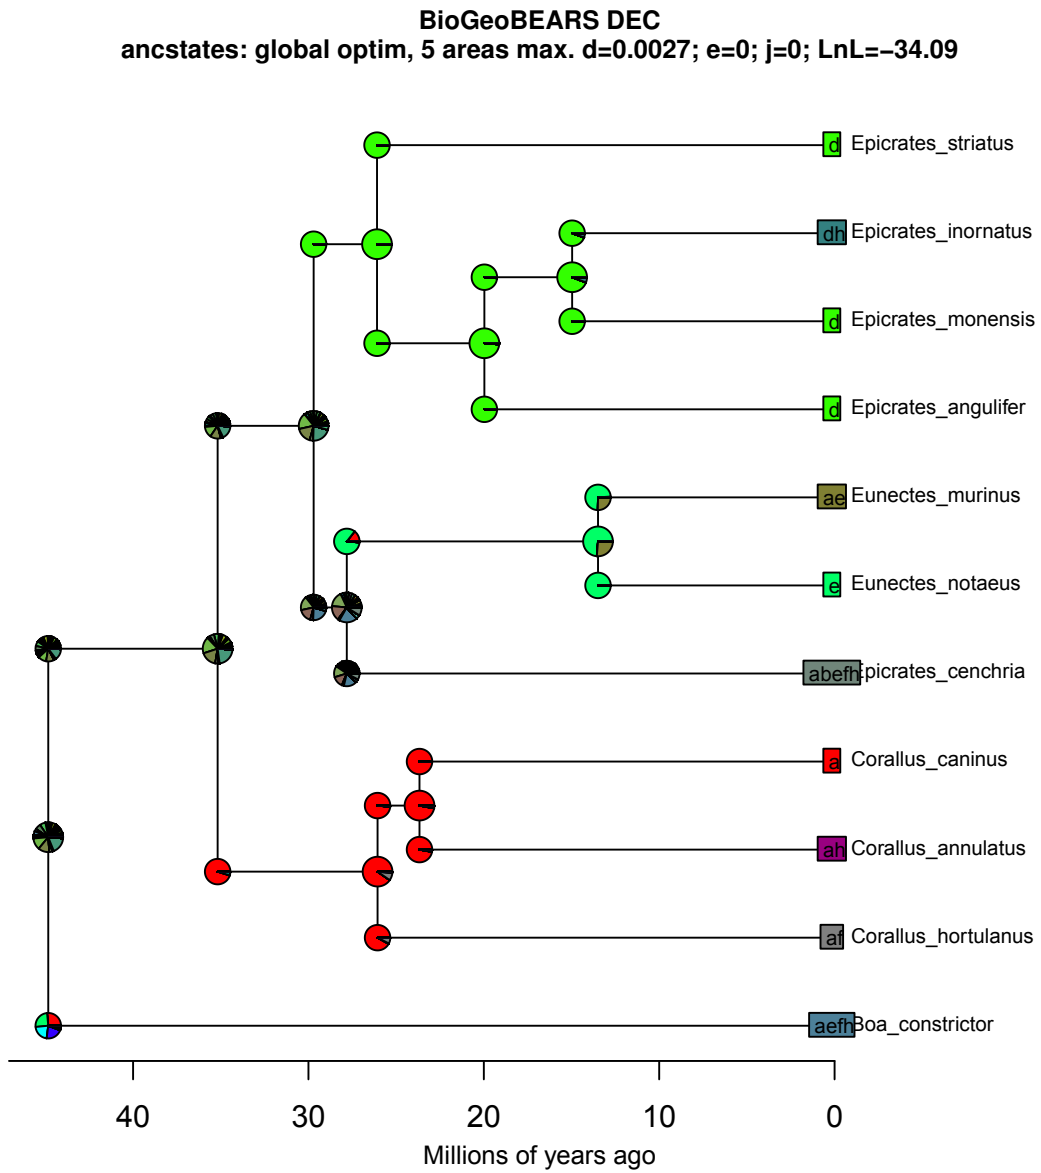

Figure S8: Clades of squamates

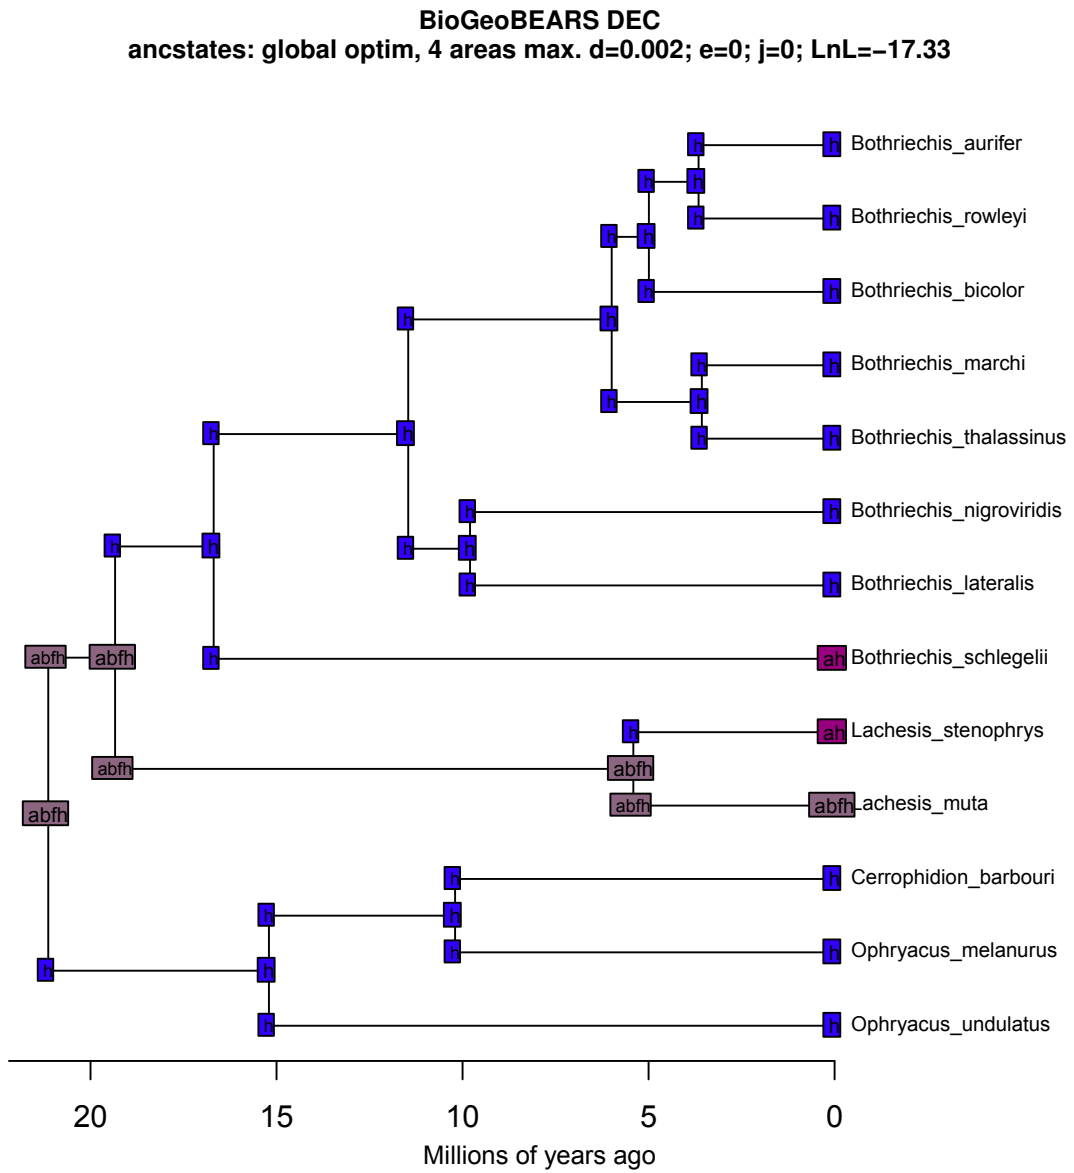



Figure S8: Clades of squamates

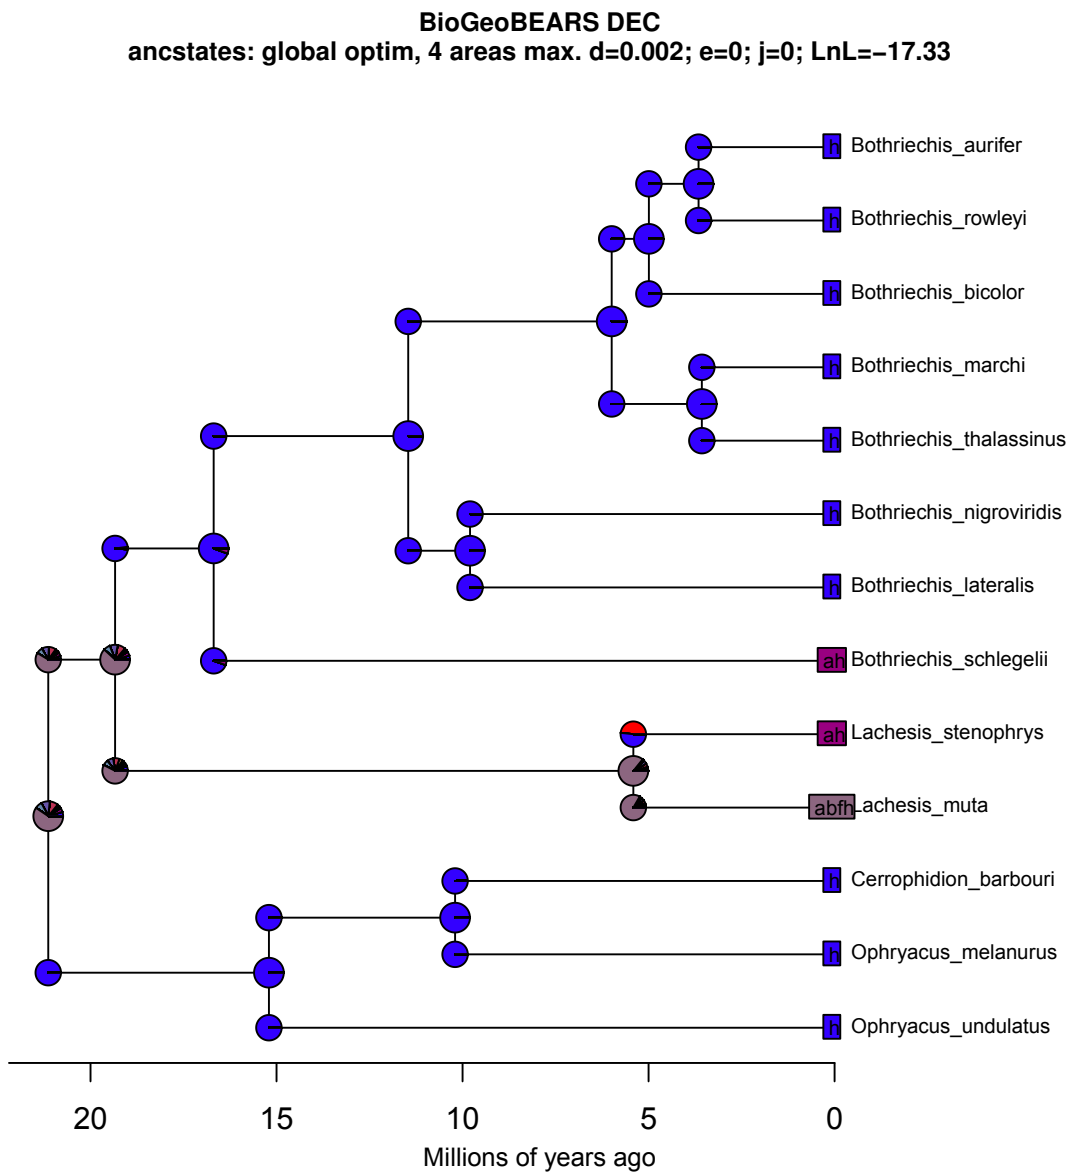

Figure S8: Clades of squamates

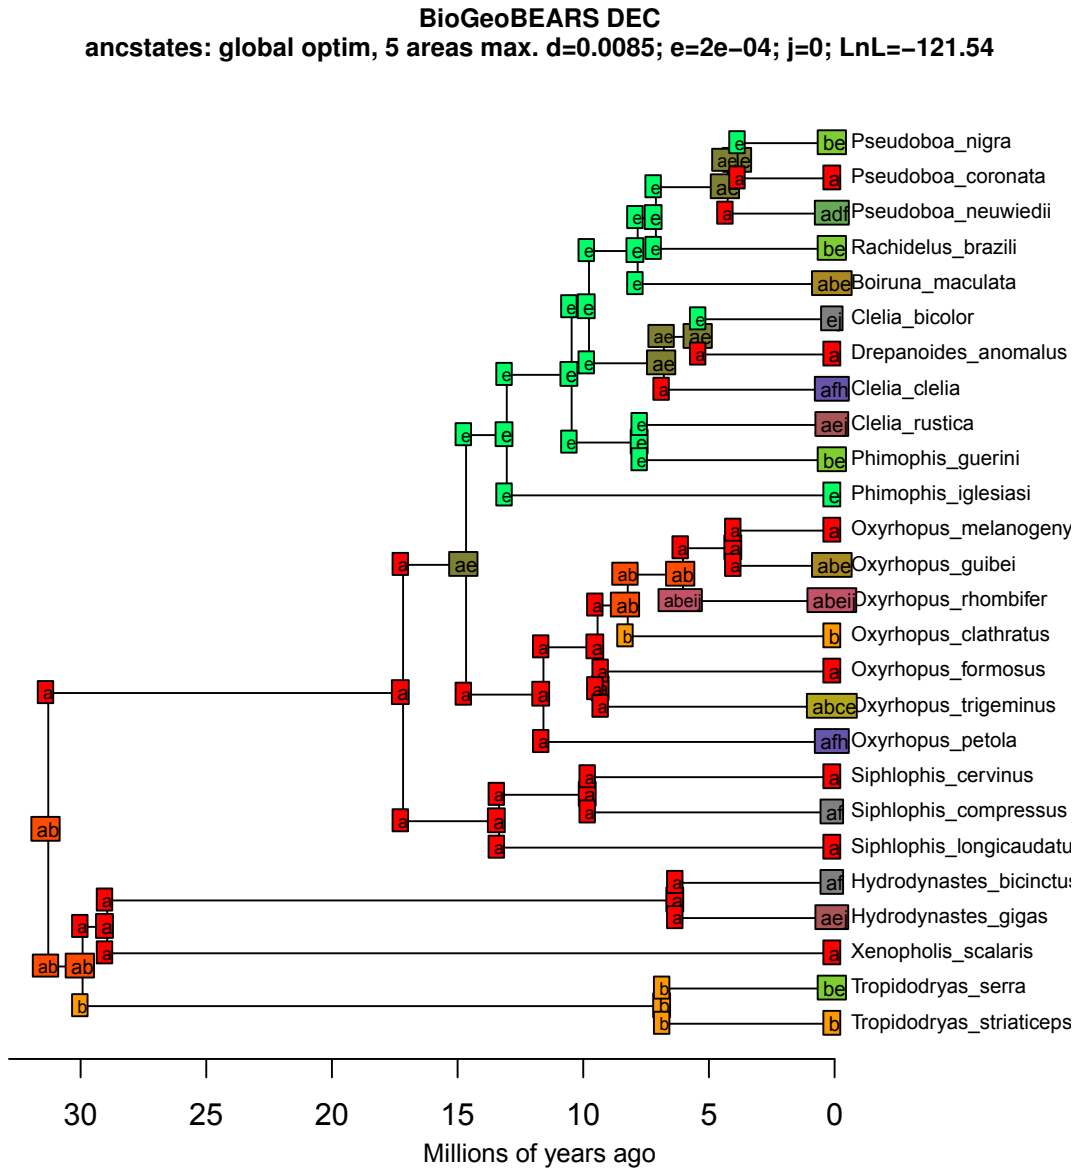

Figure S8: Clades of squamates

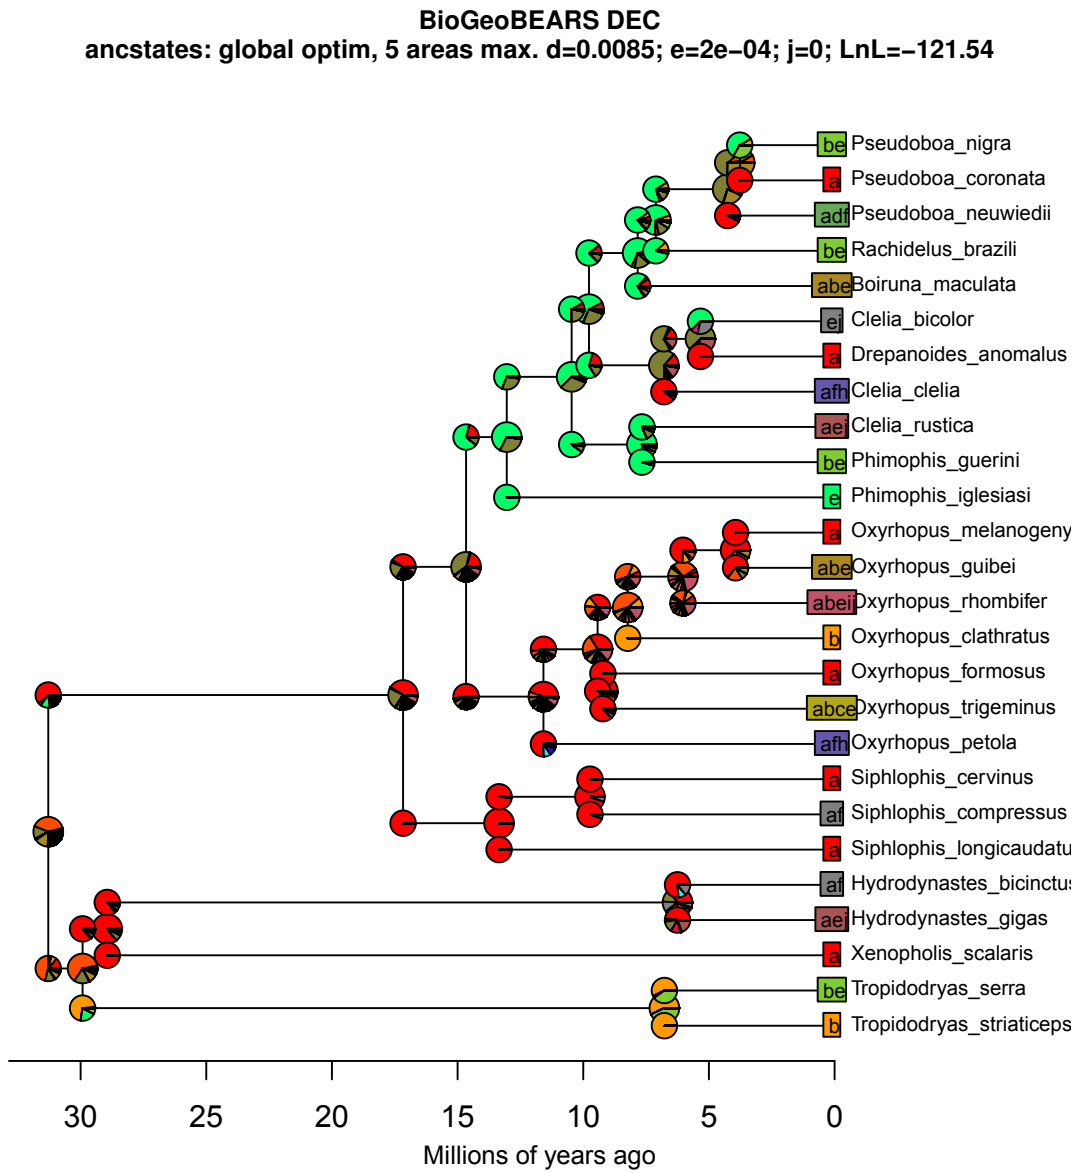

Figure S8: Clades of squamates

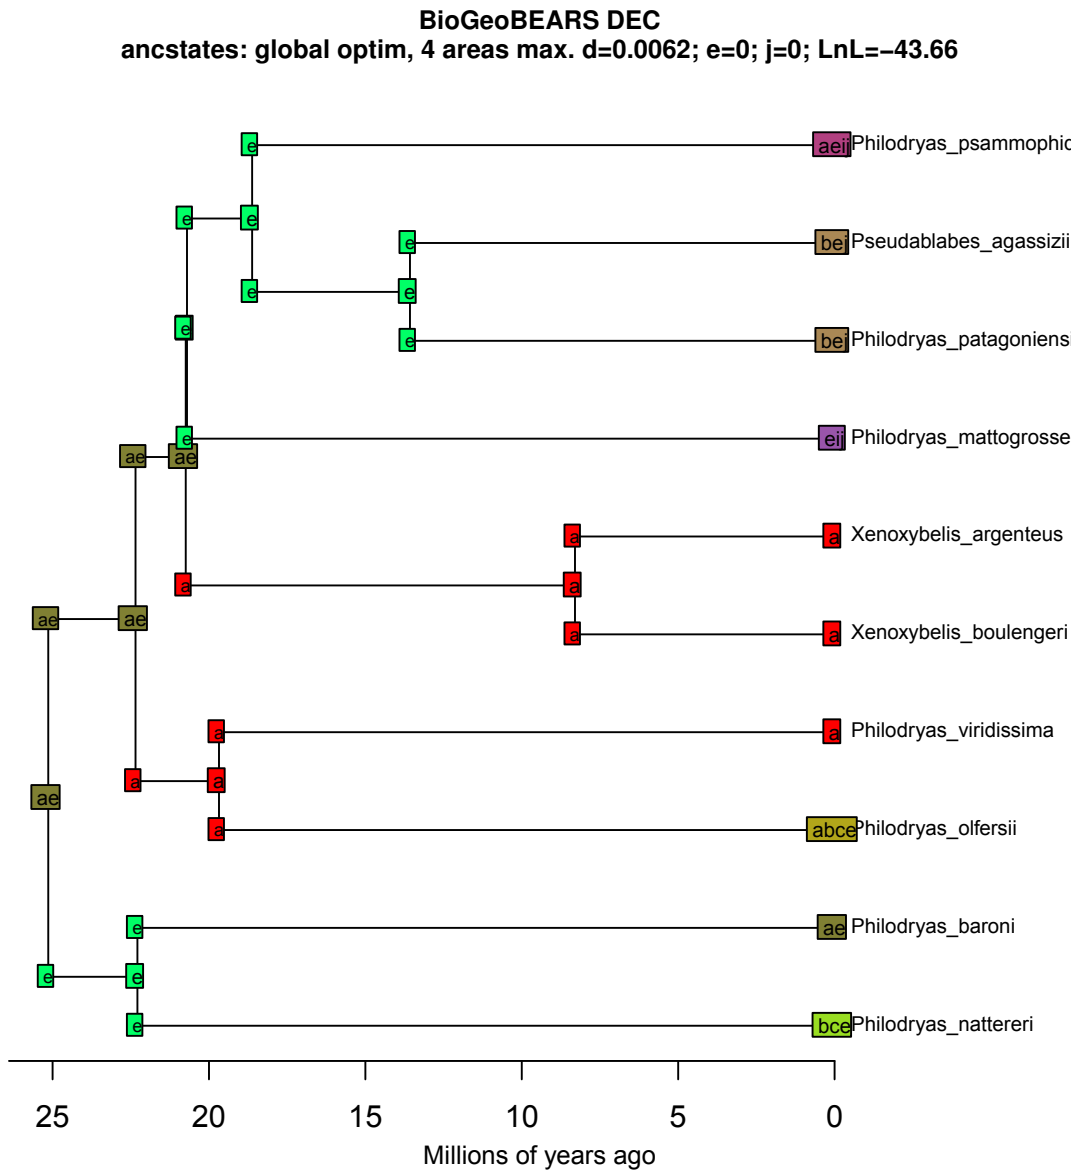

Figure S8: Clades of squamates

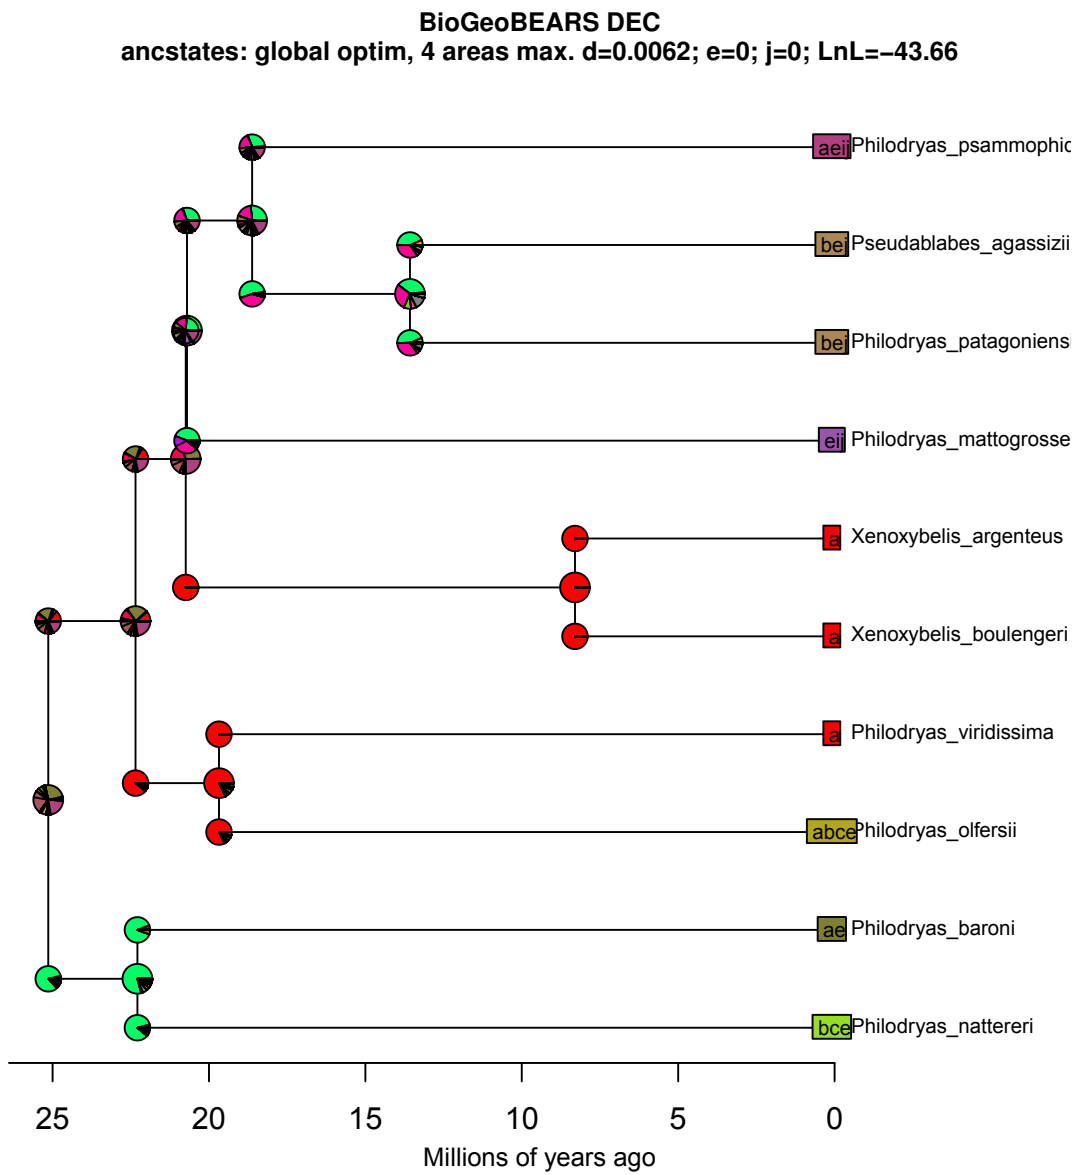

Figure S8: Clades of squamates

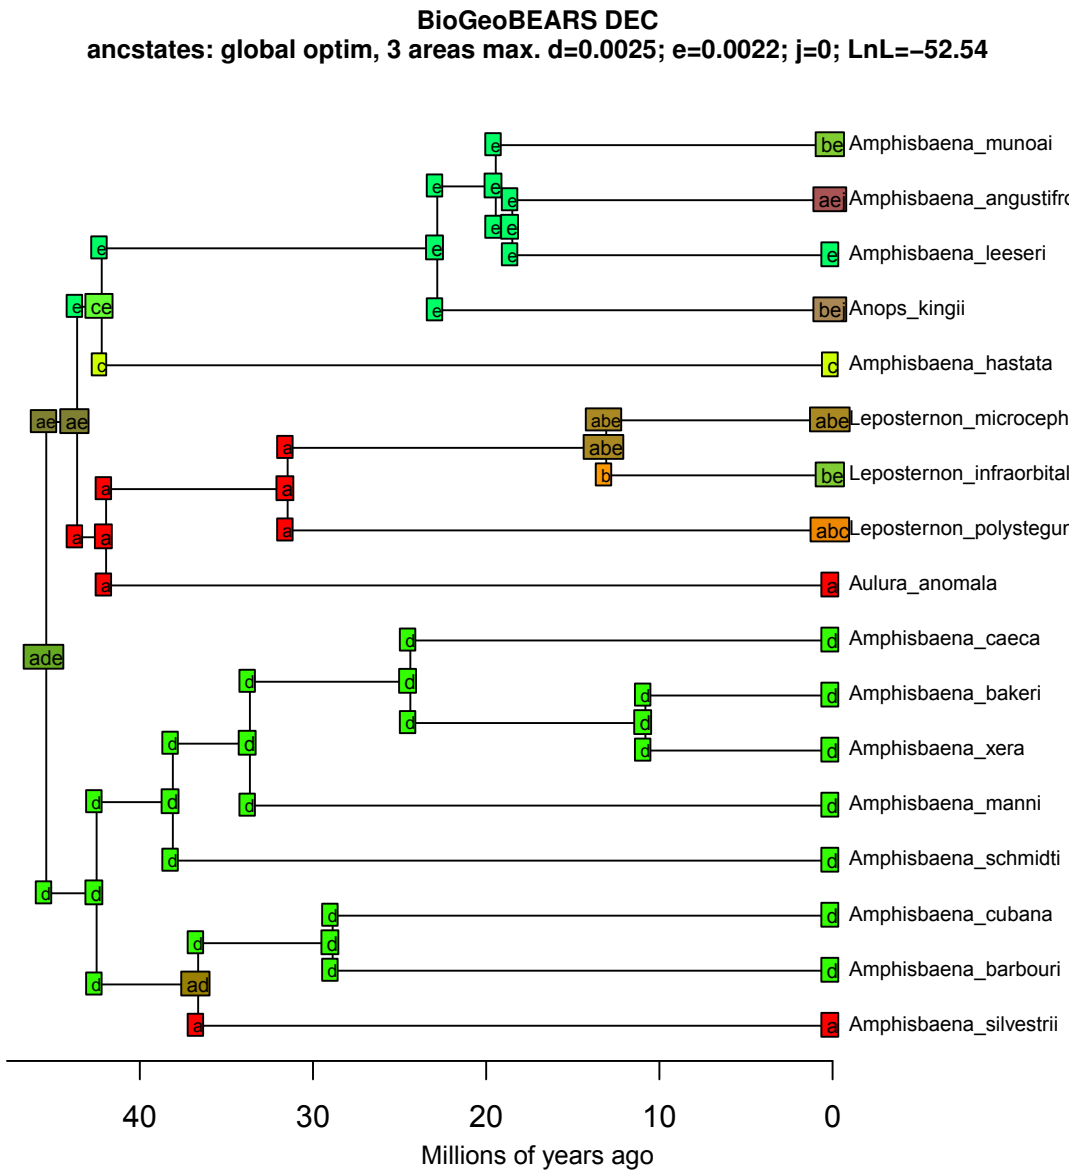

Figure S8: Clades of squamates

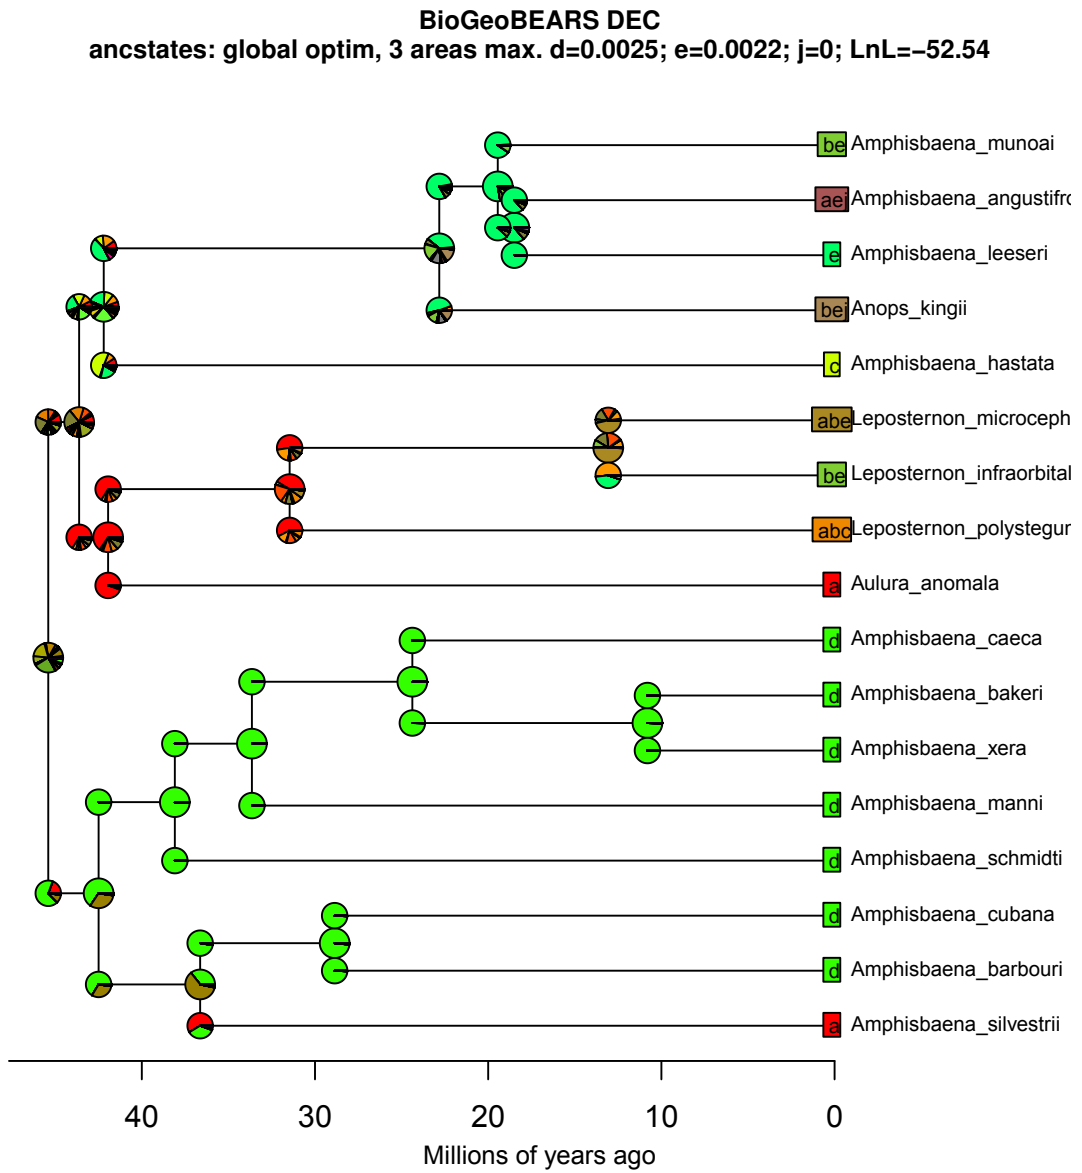

Figure S8: Clades of squamates

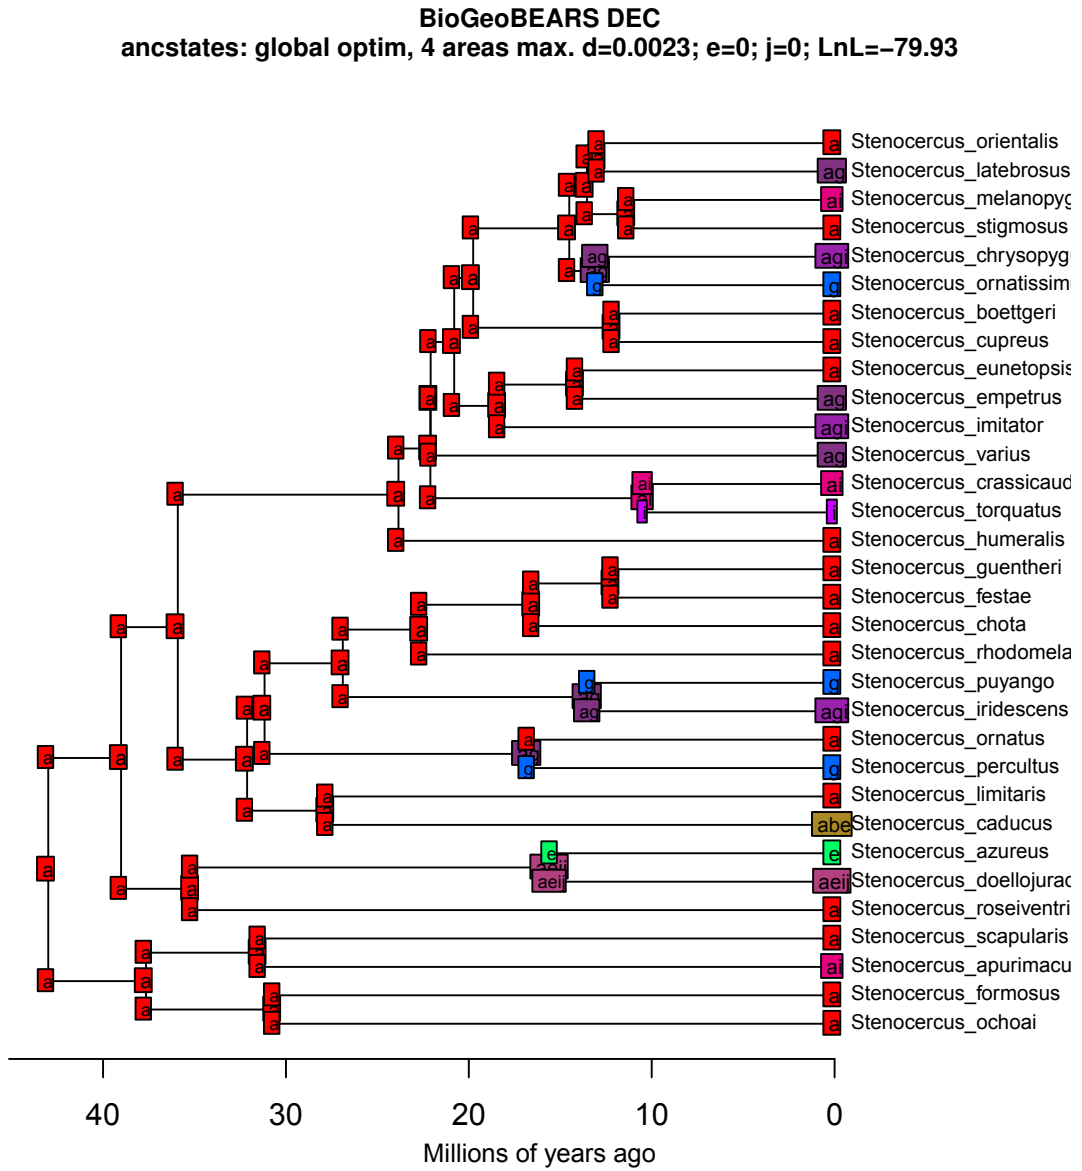



Figure S8: Clades of squamates

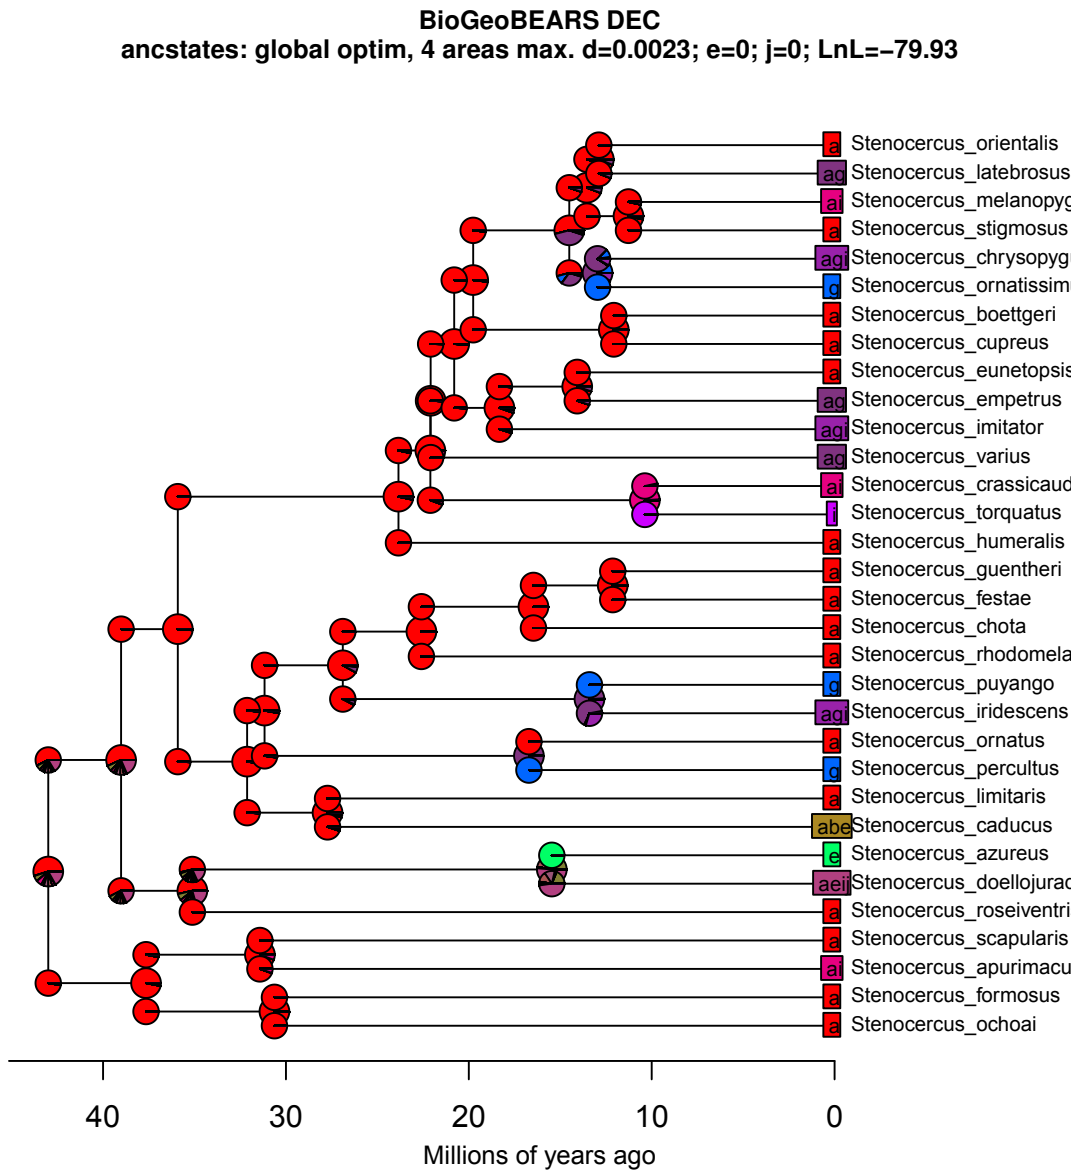

Figure S8: Clades of squamates

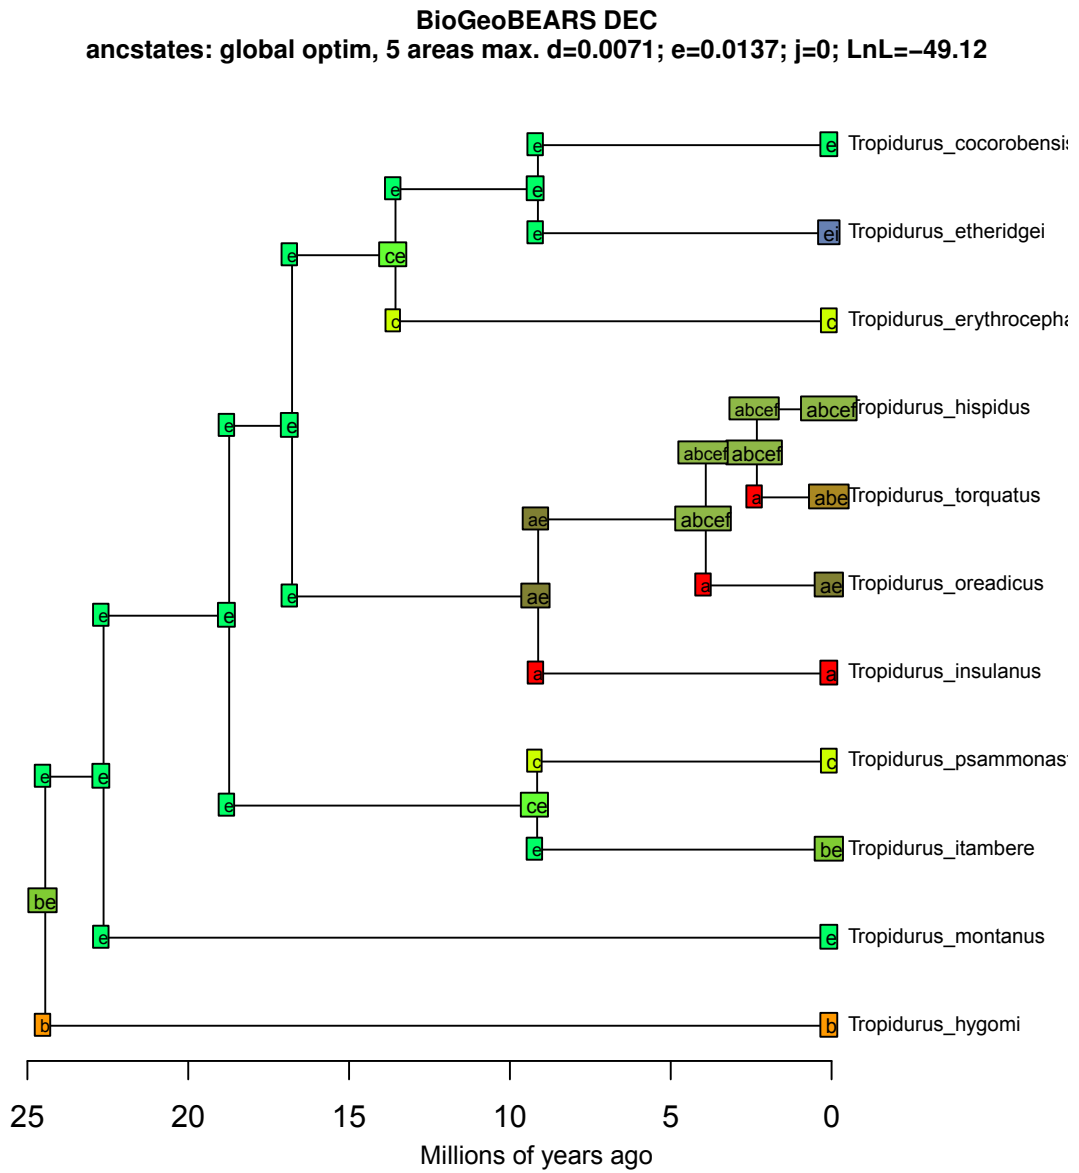

Figure S8: Clades of squamates

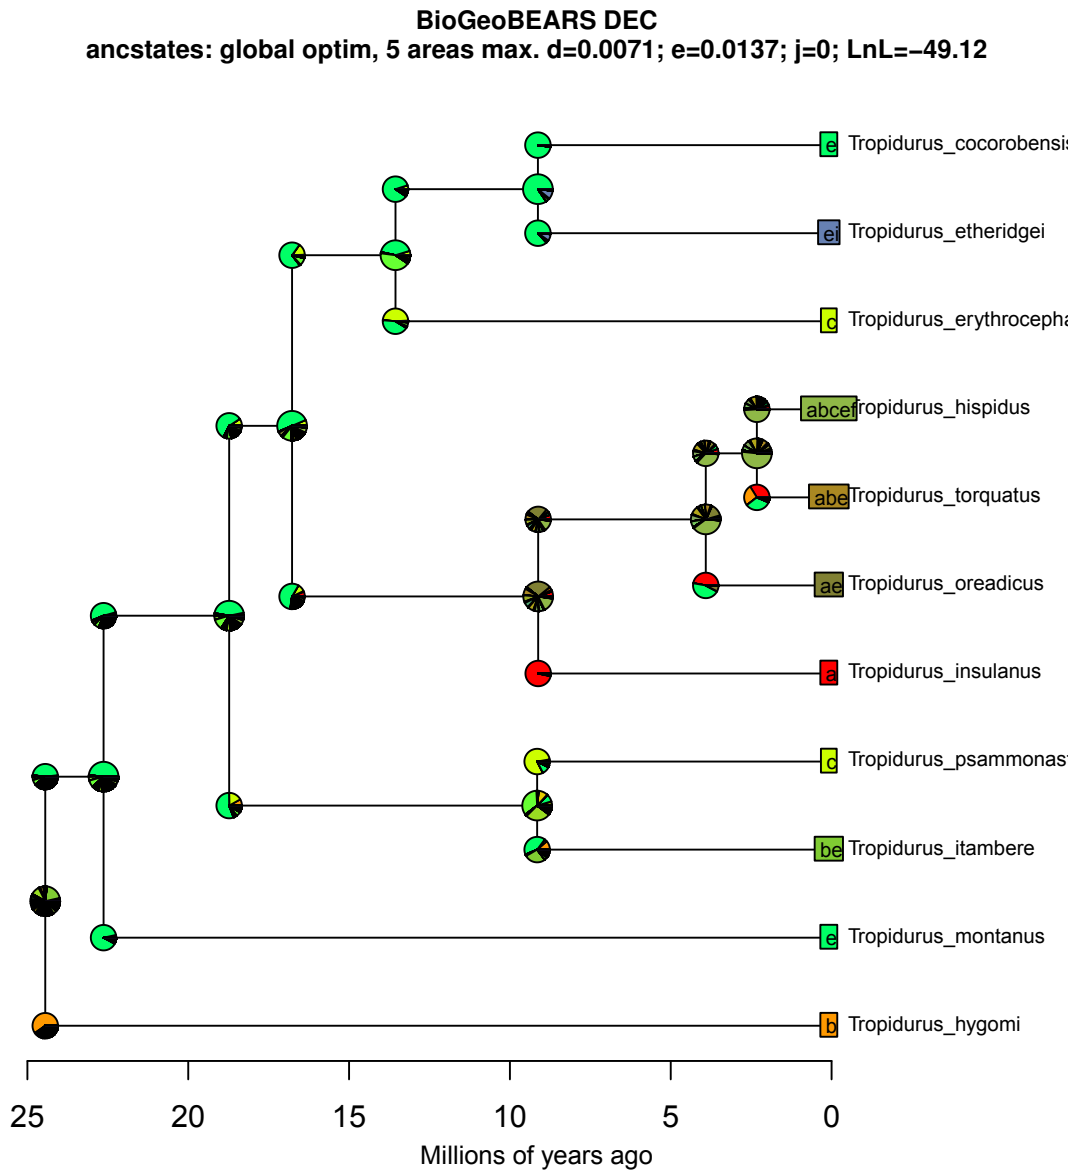

Figure S8: Clades of squamates

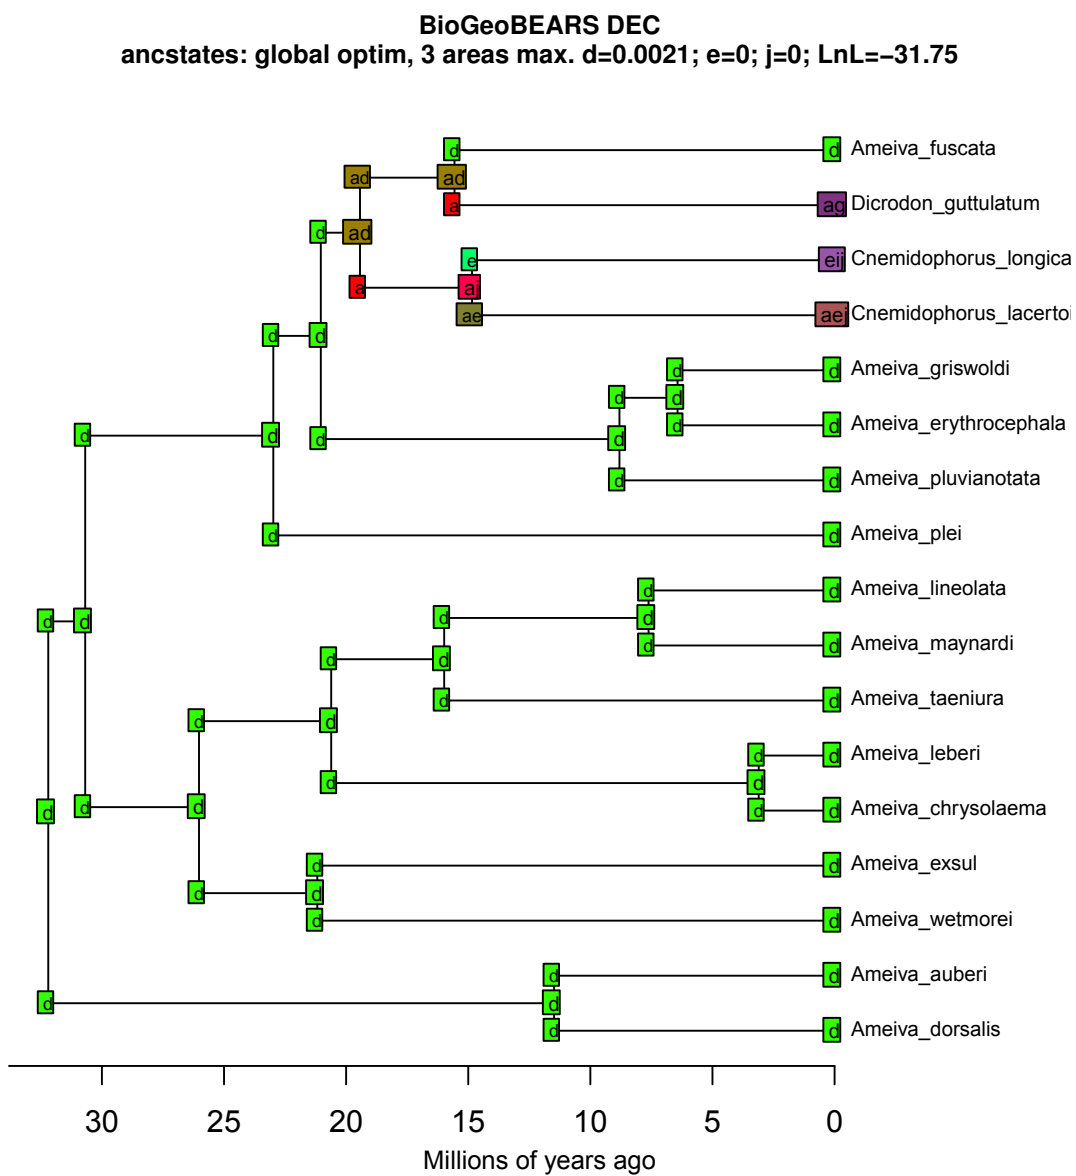

Figure S8: Clades of squamates

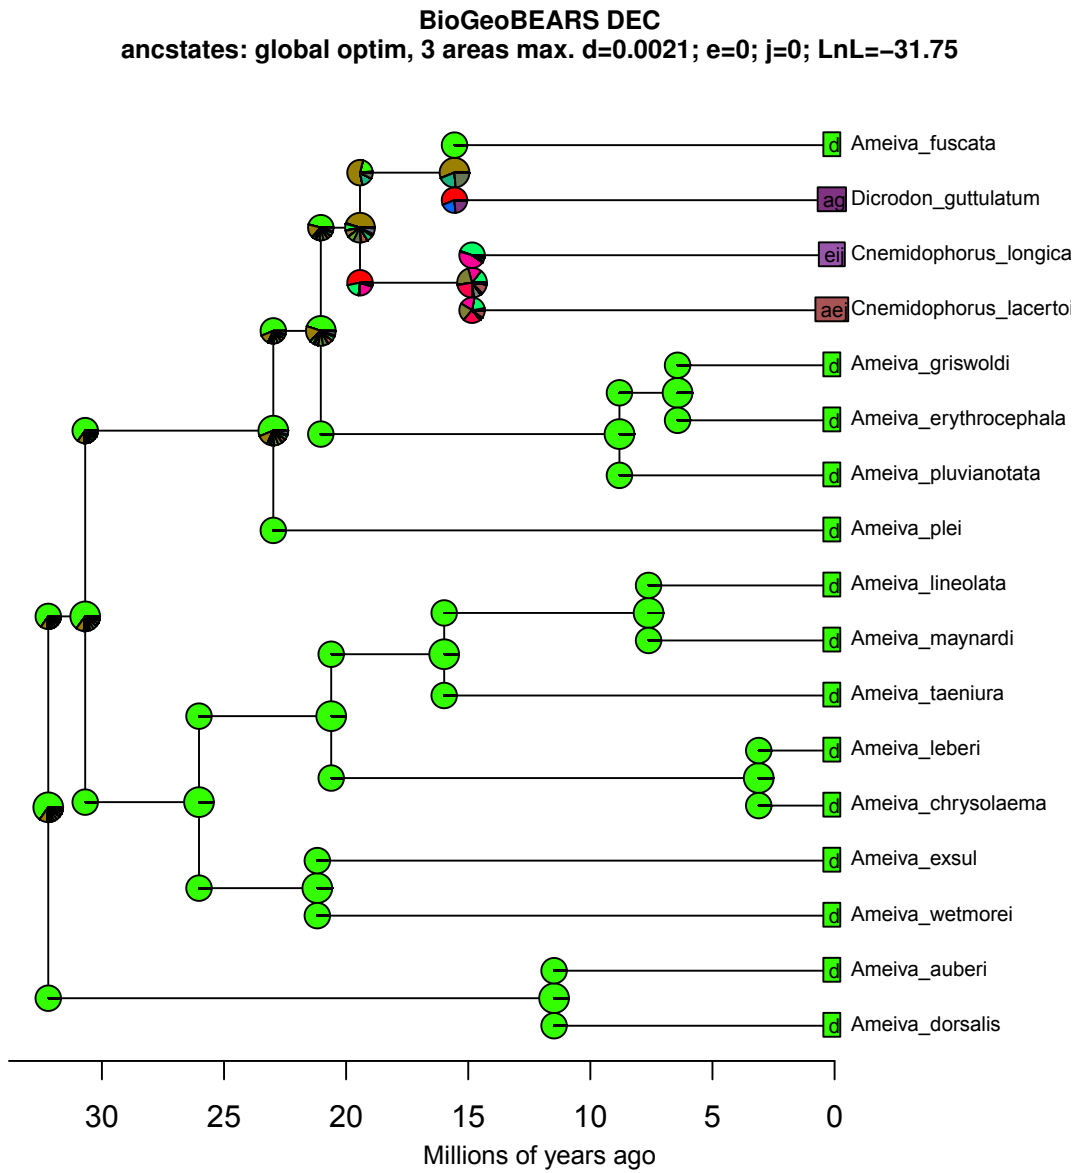

Figure S8: Clades of squamates

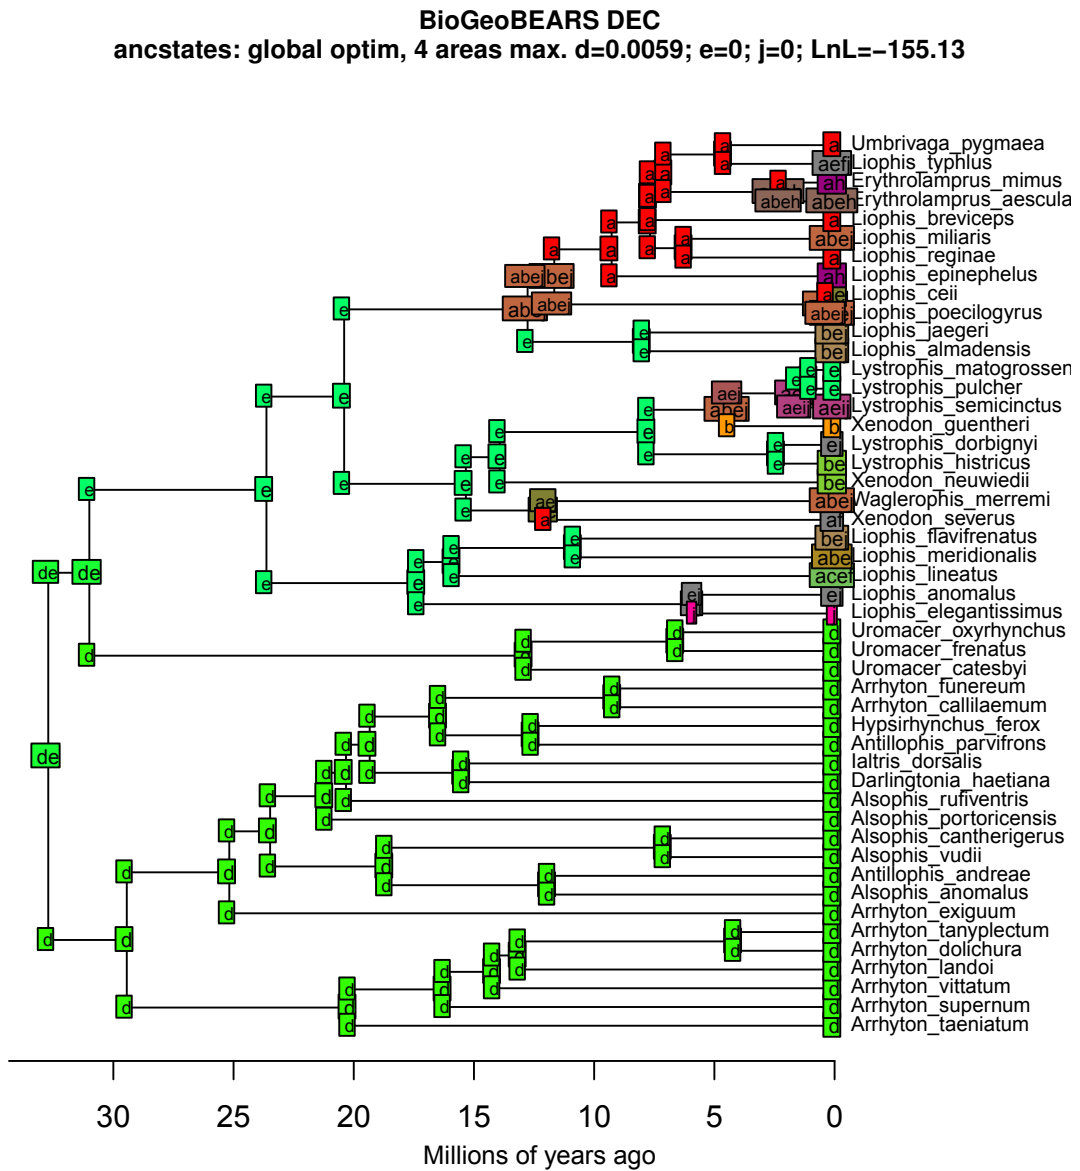

Figure S8: Clades of squamates

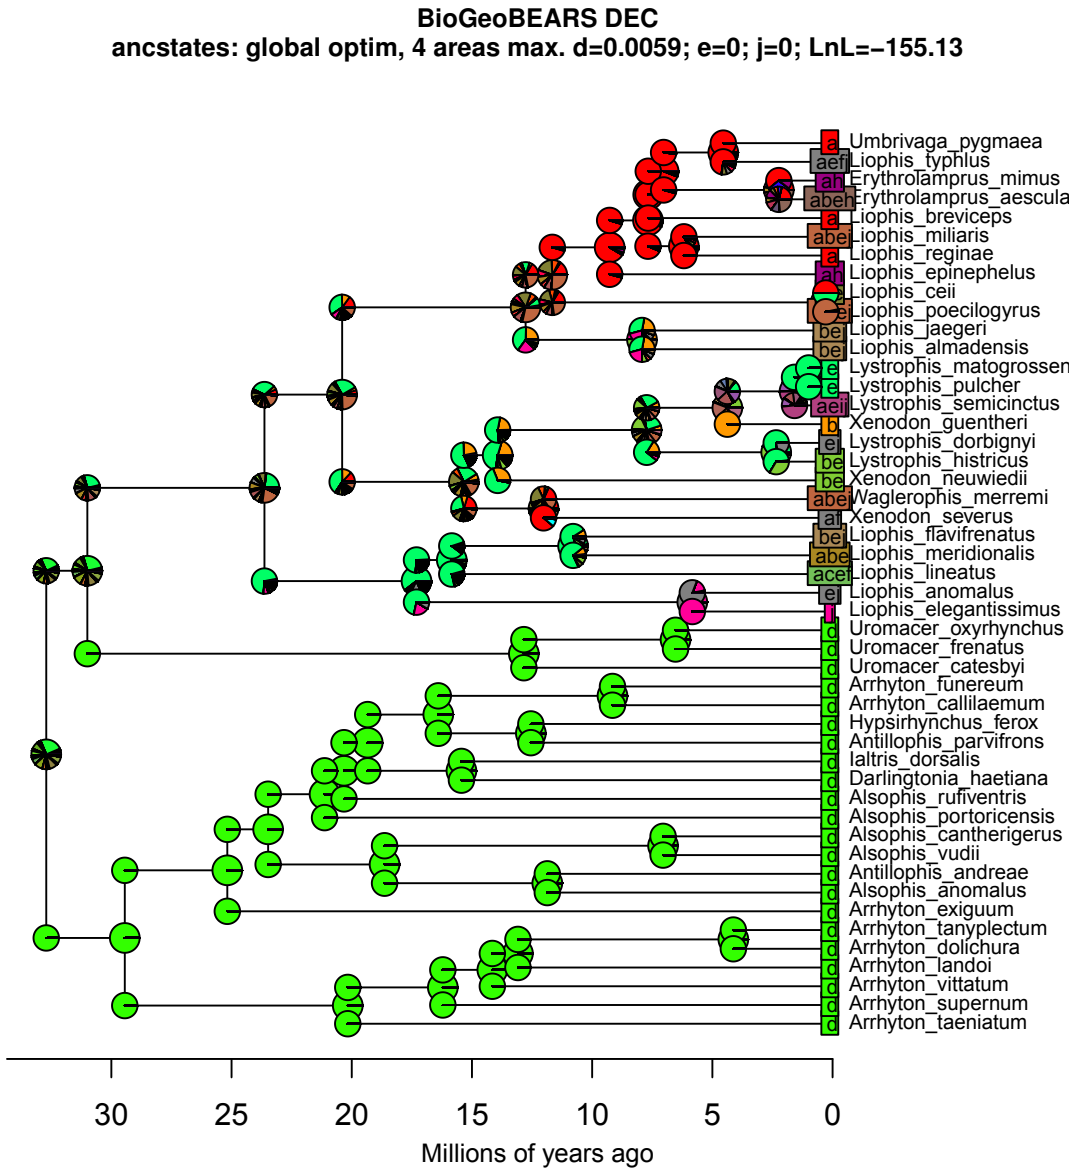

Figure S8: Clades of squamates

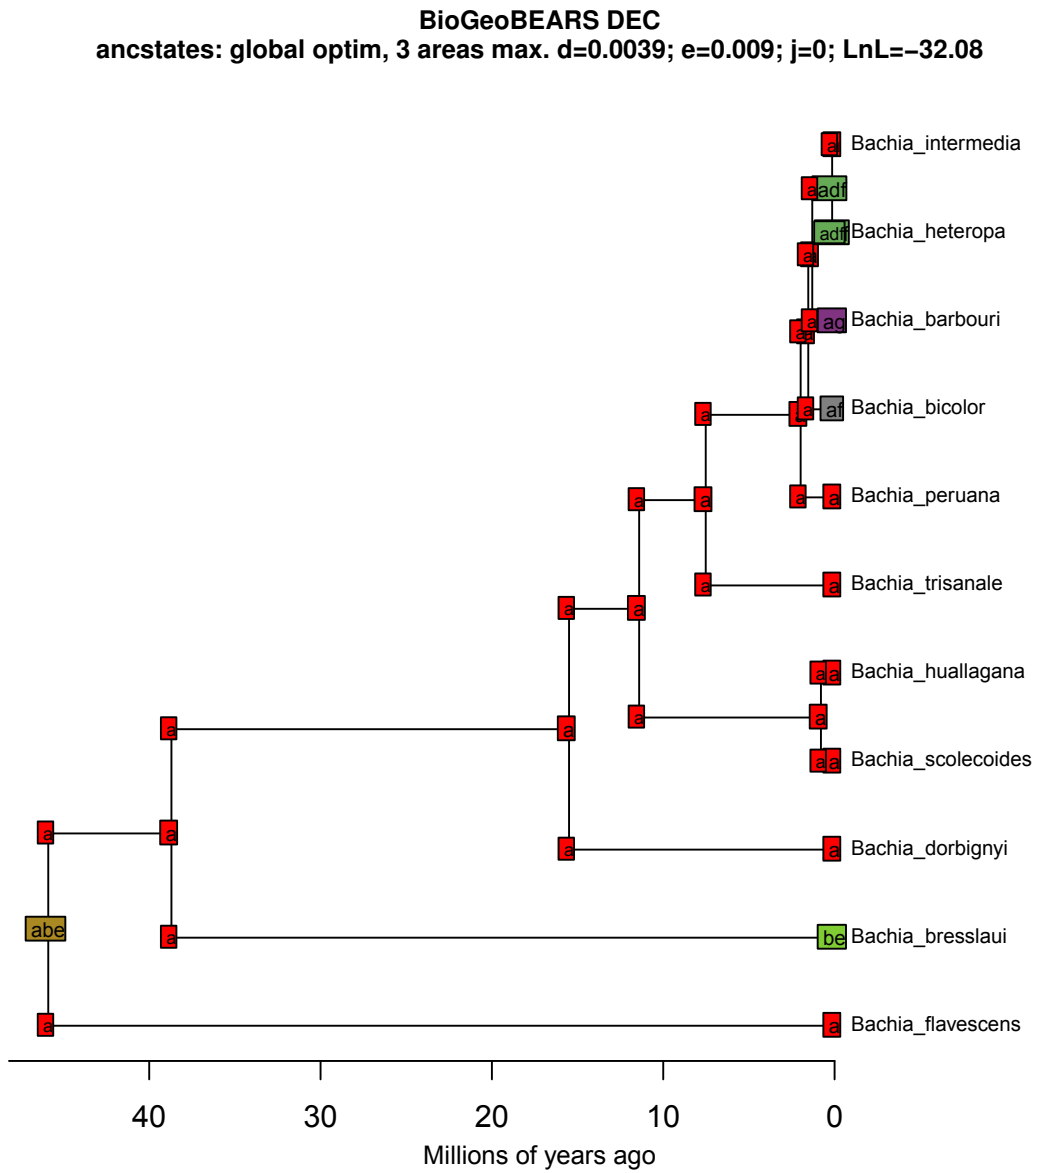



Figure S8: Clades of squamates

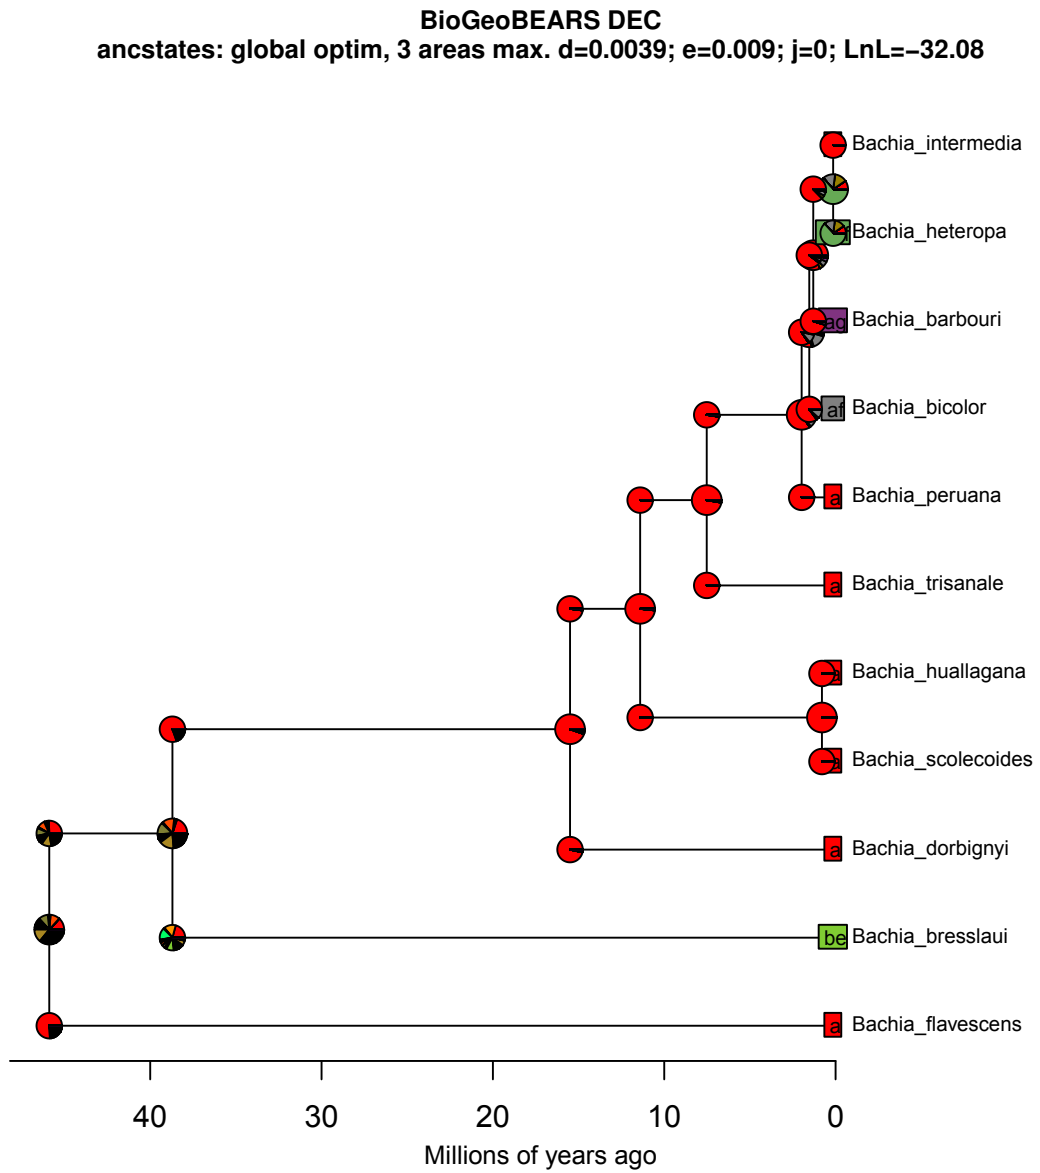

Figure S8: Clades of squamates

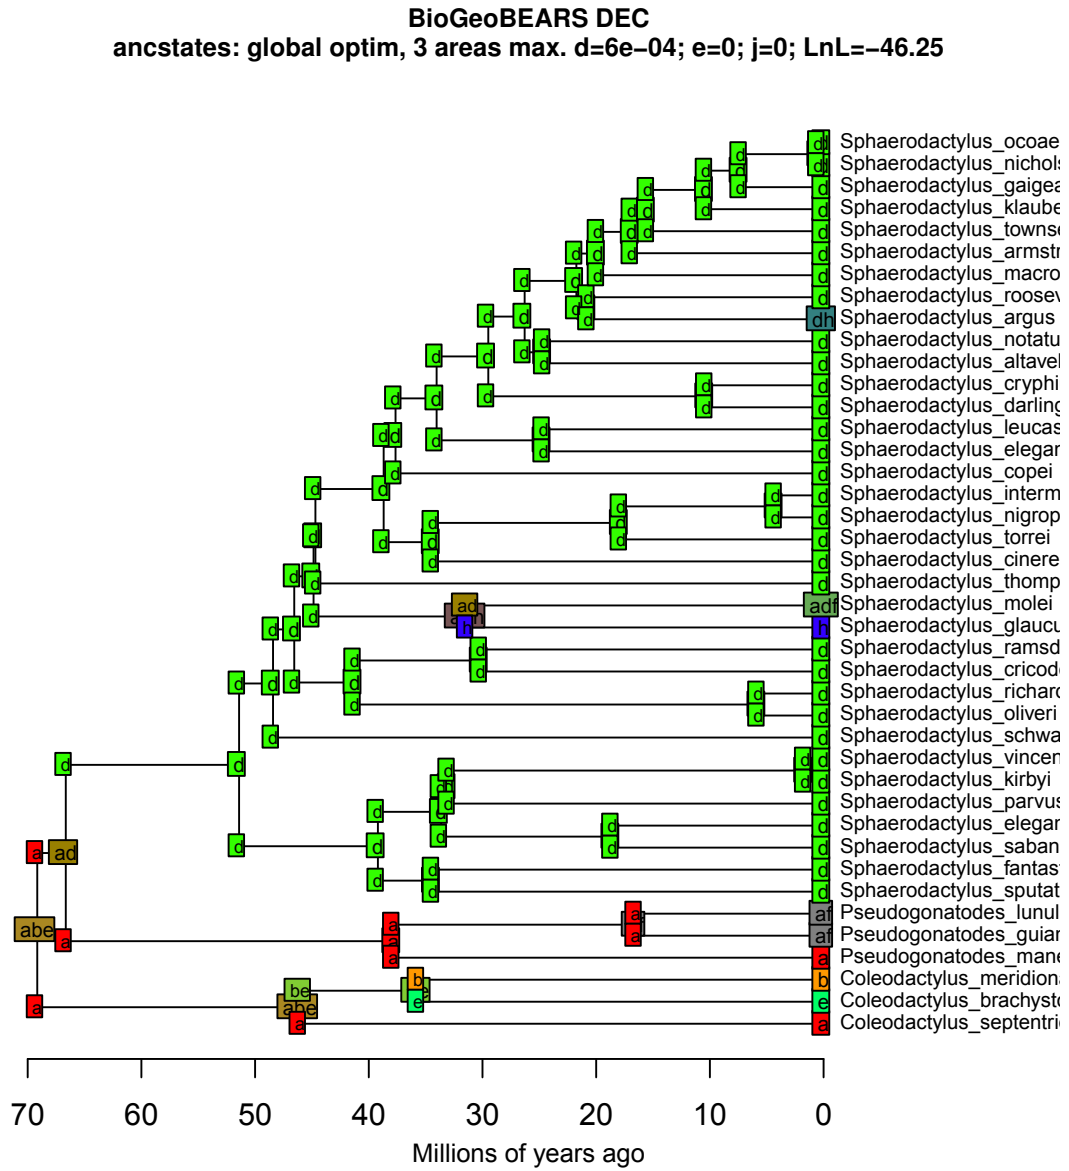

Figure S8: Clades of squamates

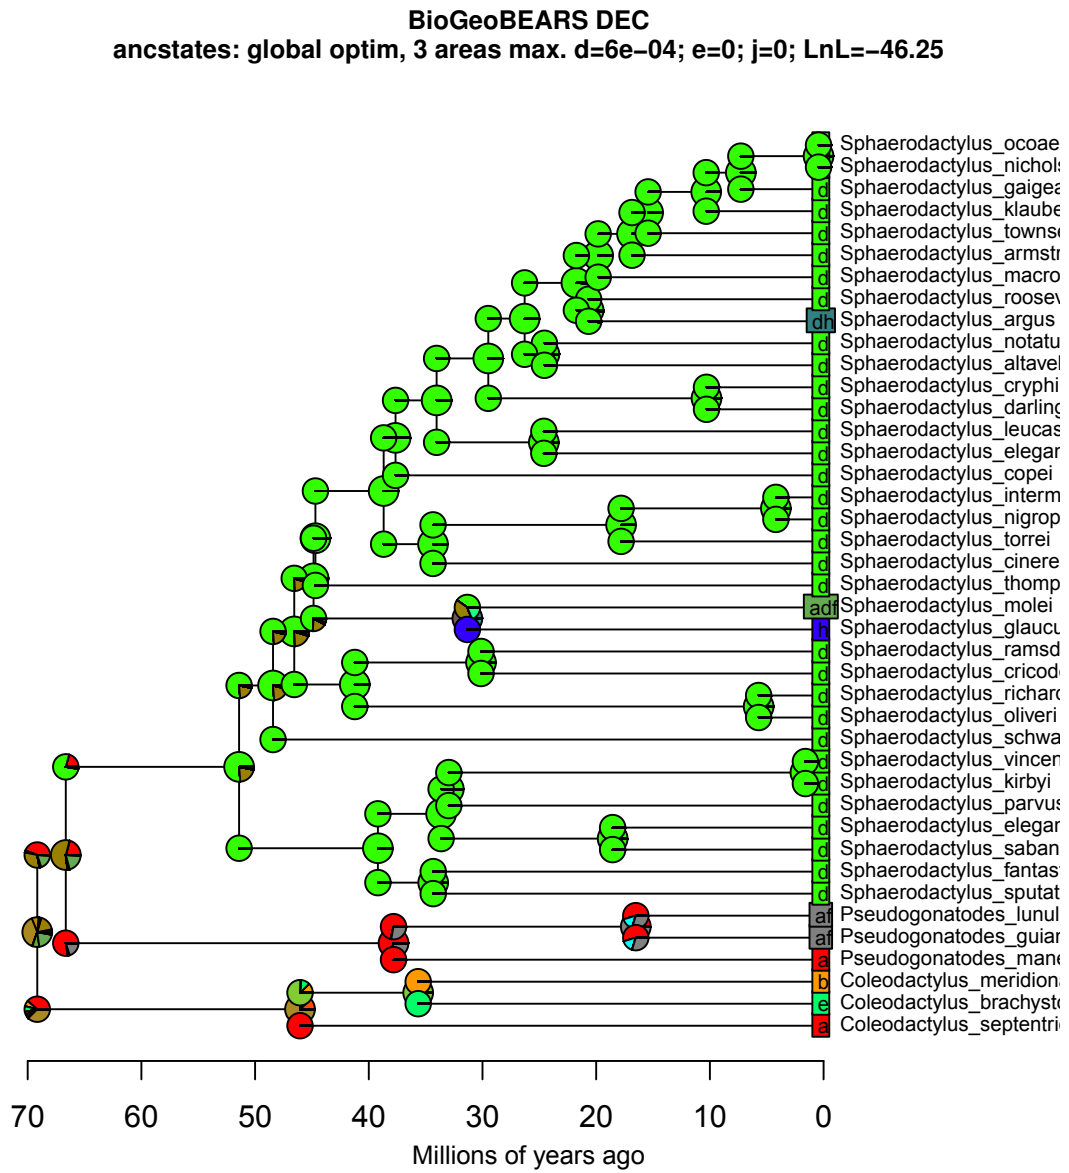

Figure S8: Clades of squamates

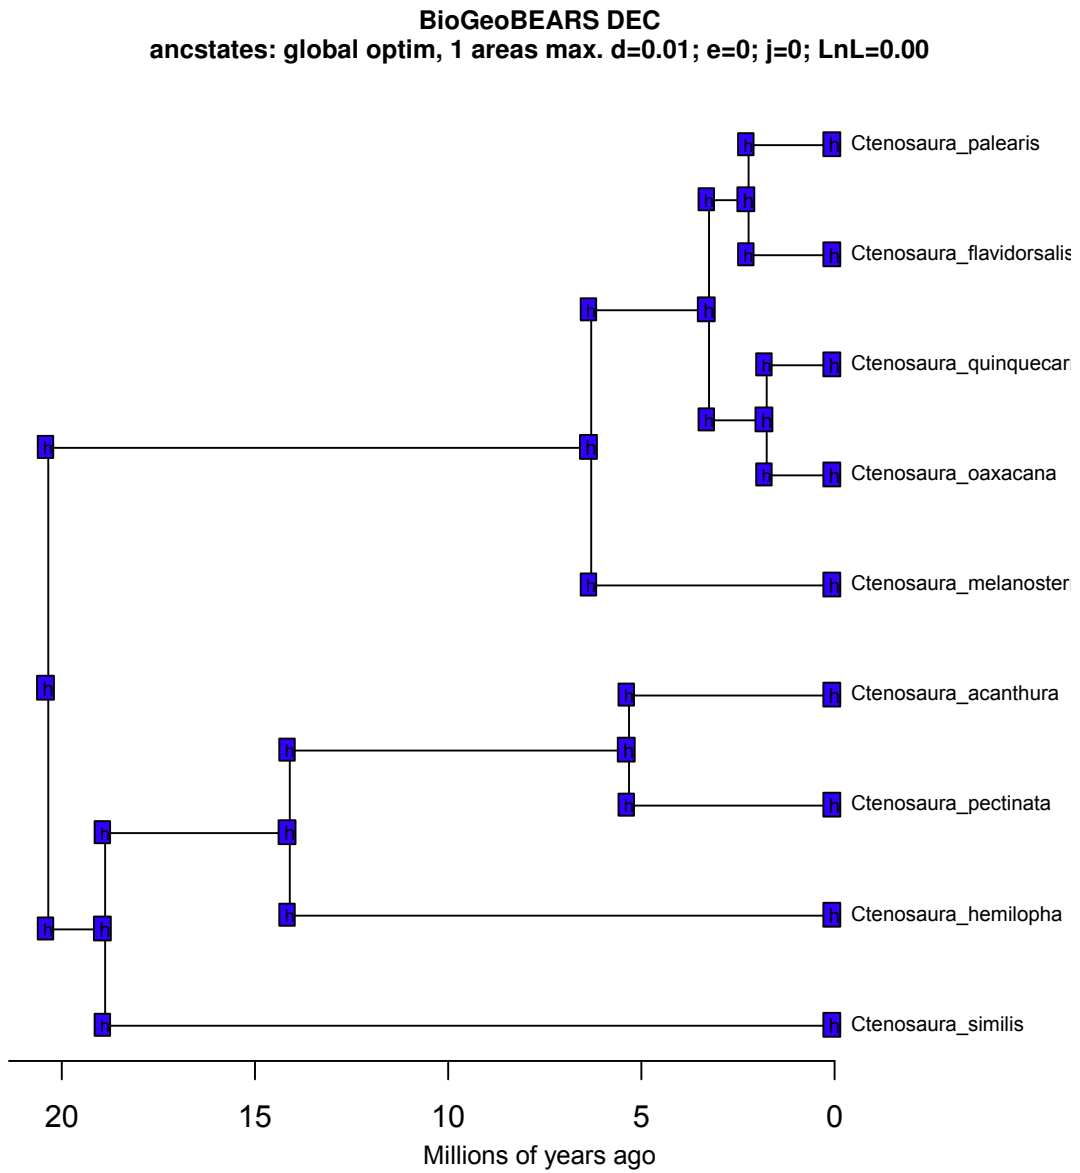

Figure S8: Clades of squamates

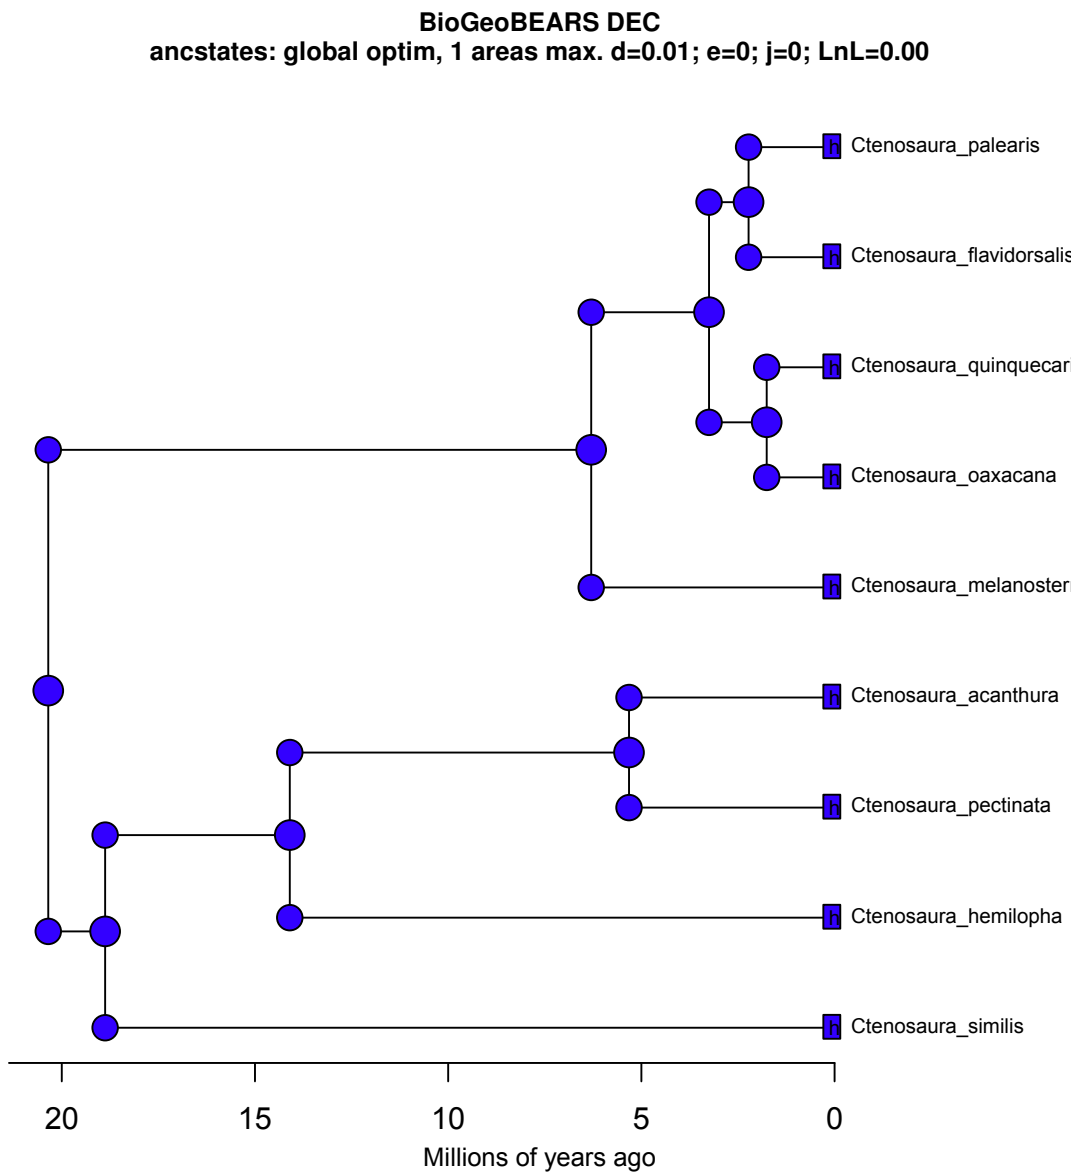

Figure S8: Clades of squamates

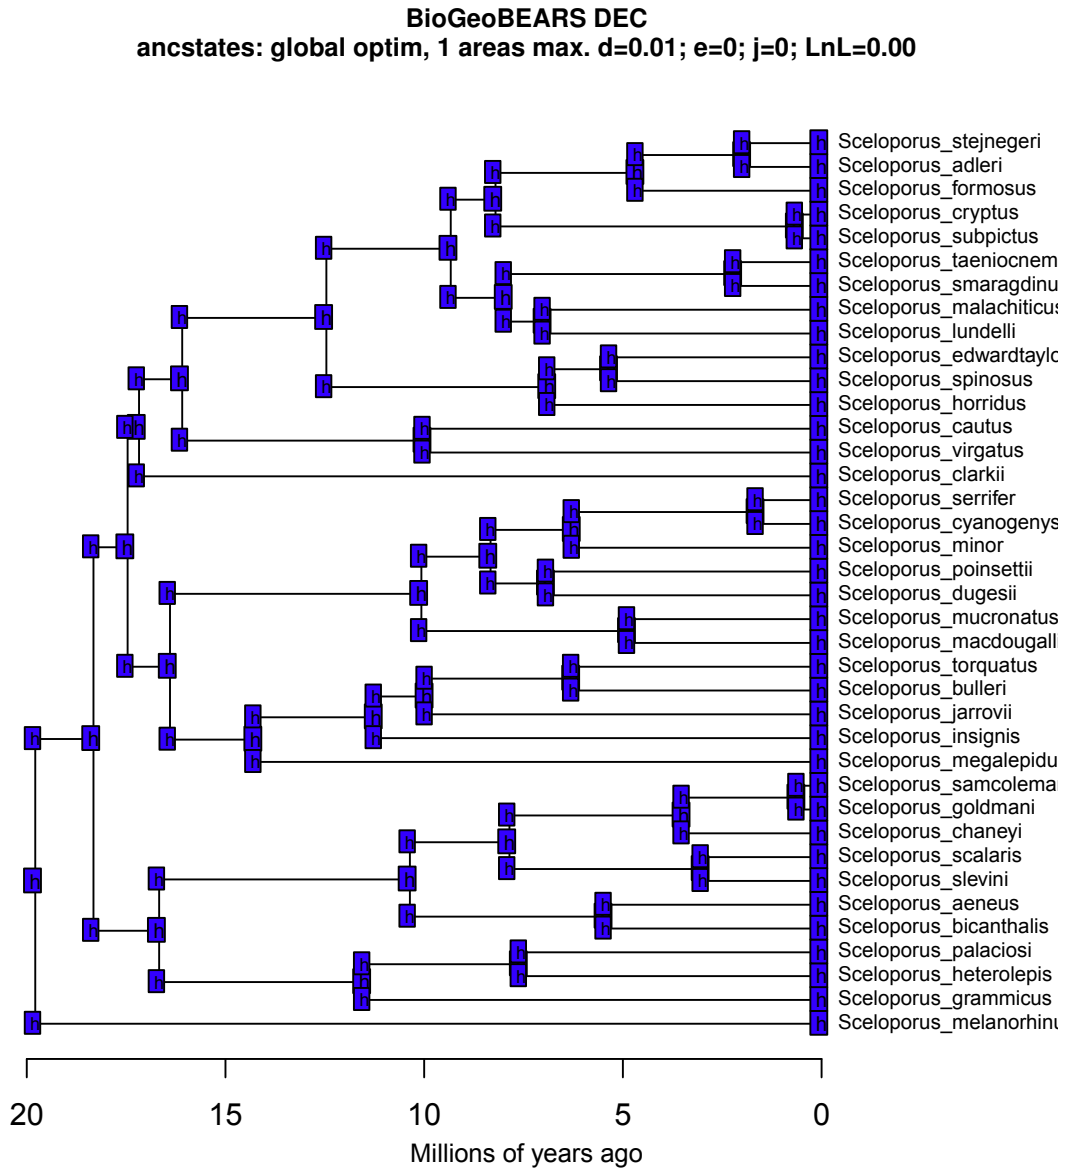

Figure S8: Clades of squamates

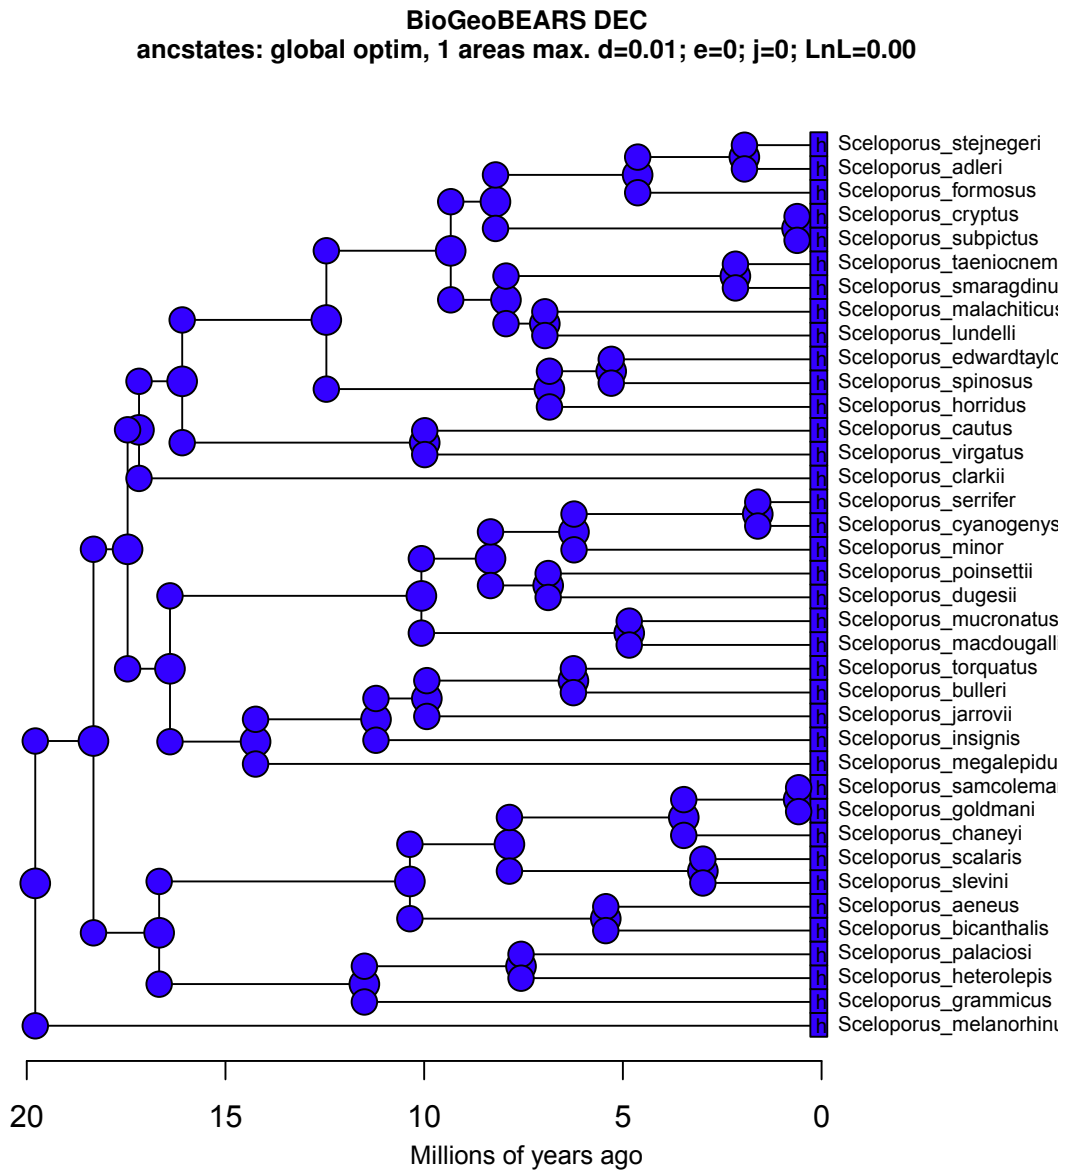

Figure S8: Clades of squamates

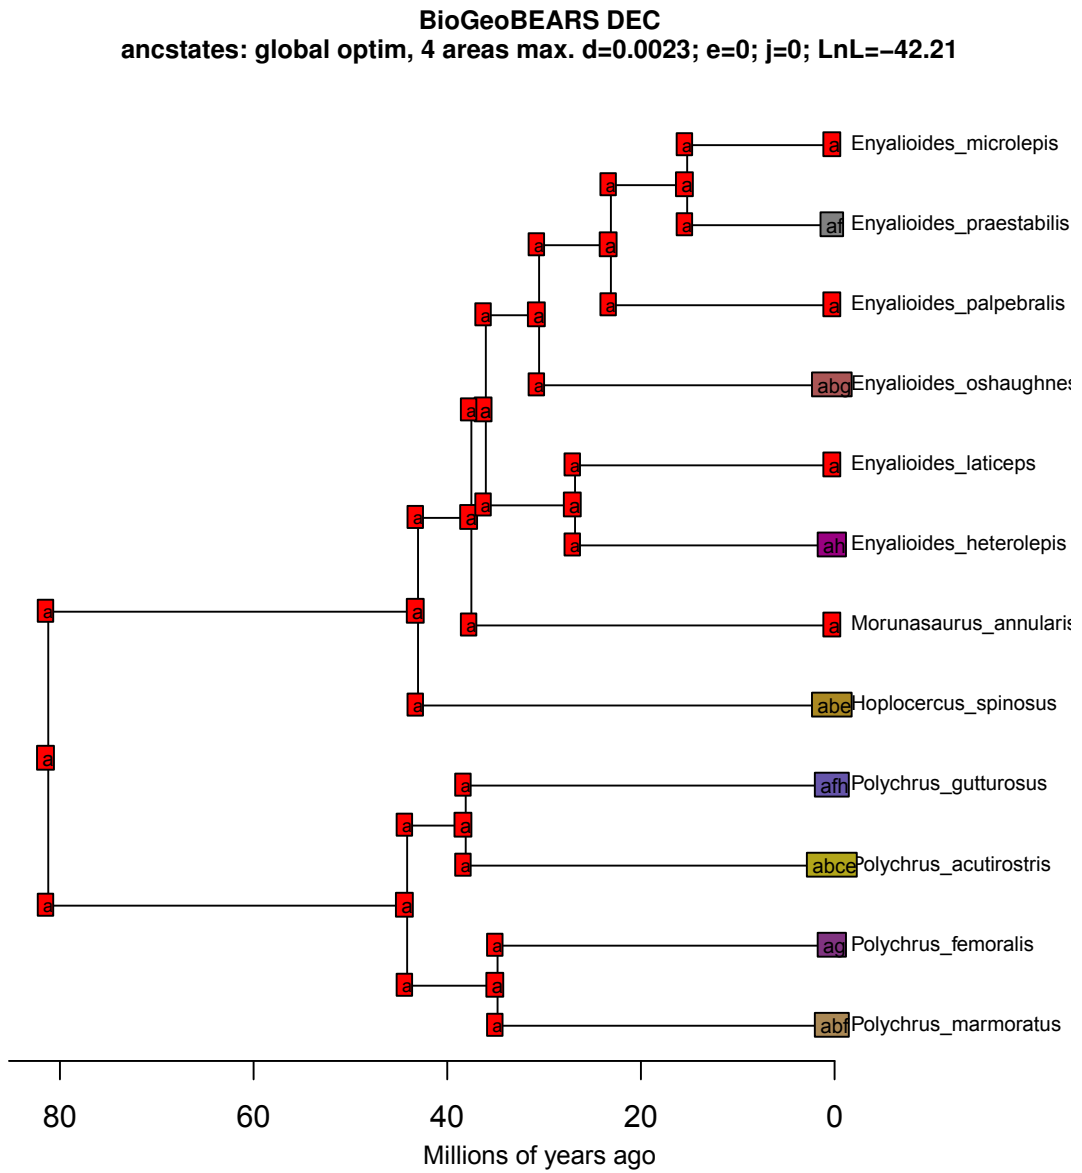



Figure S8: Clades of squamates

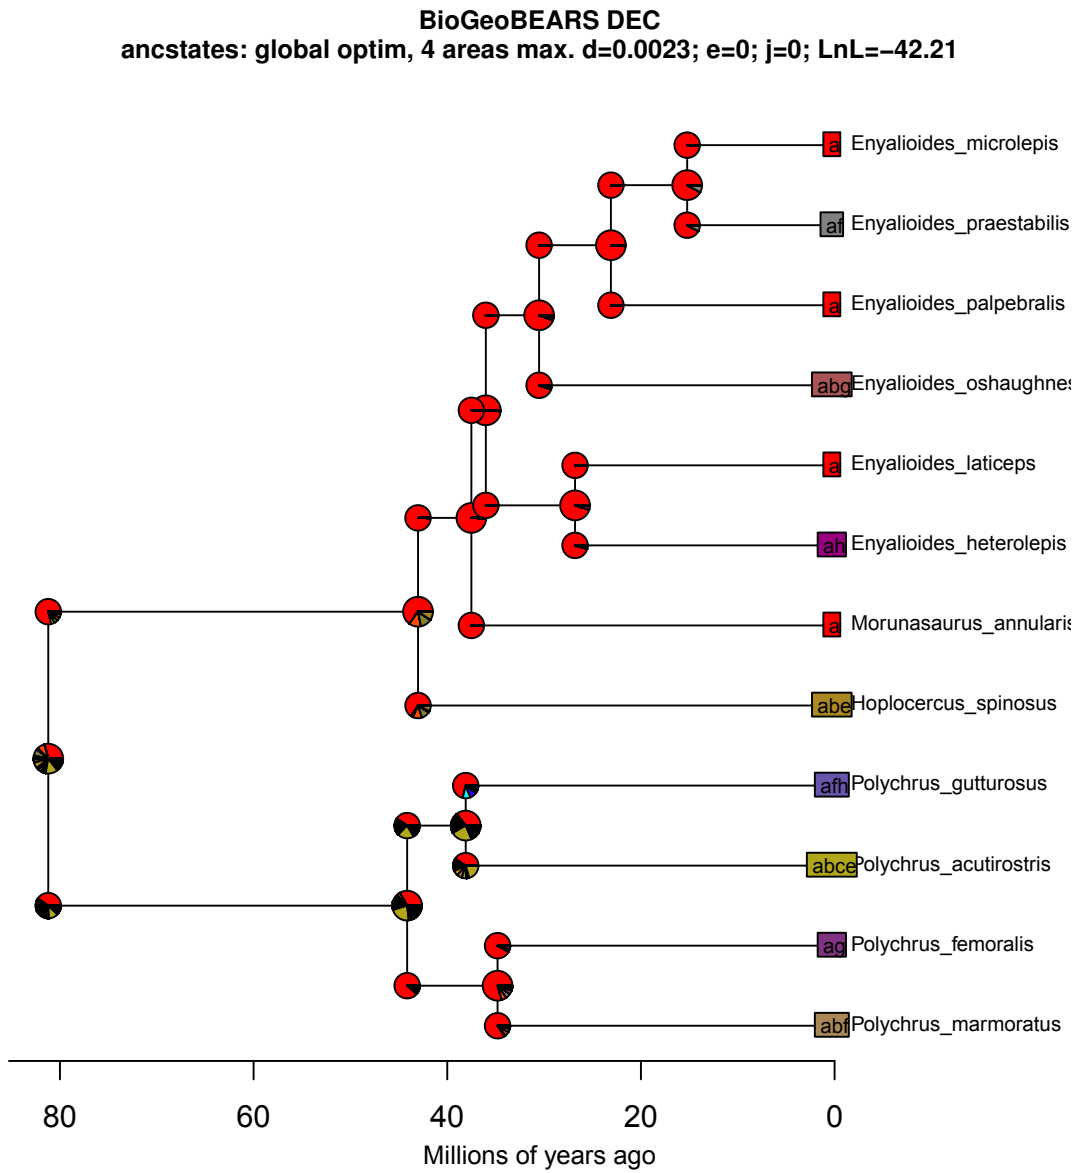

Figure S8: Clades of squamates

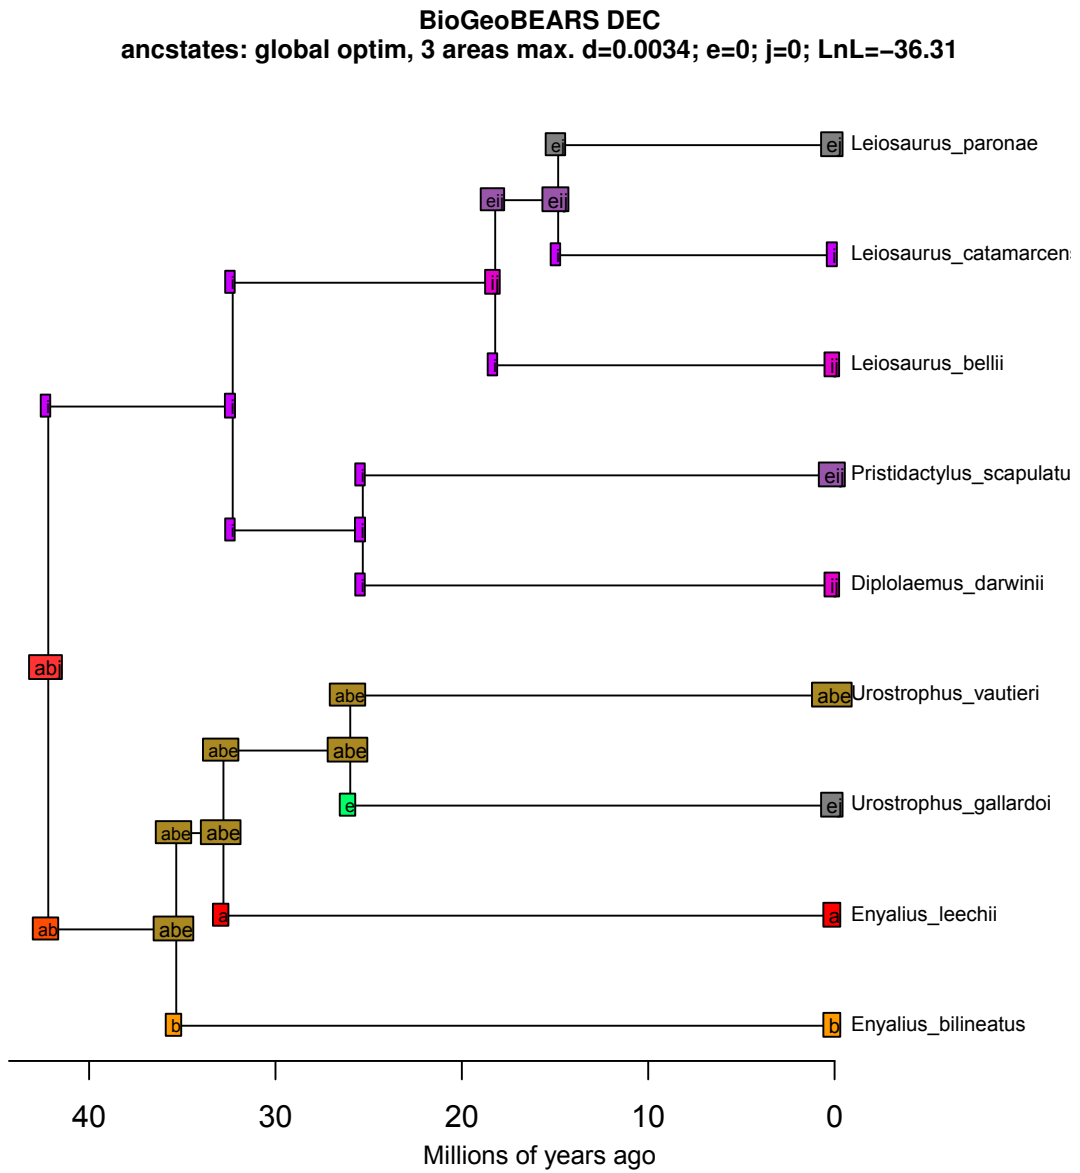

Figure S8: Clades of squamates

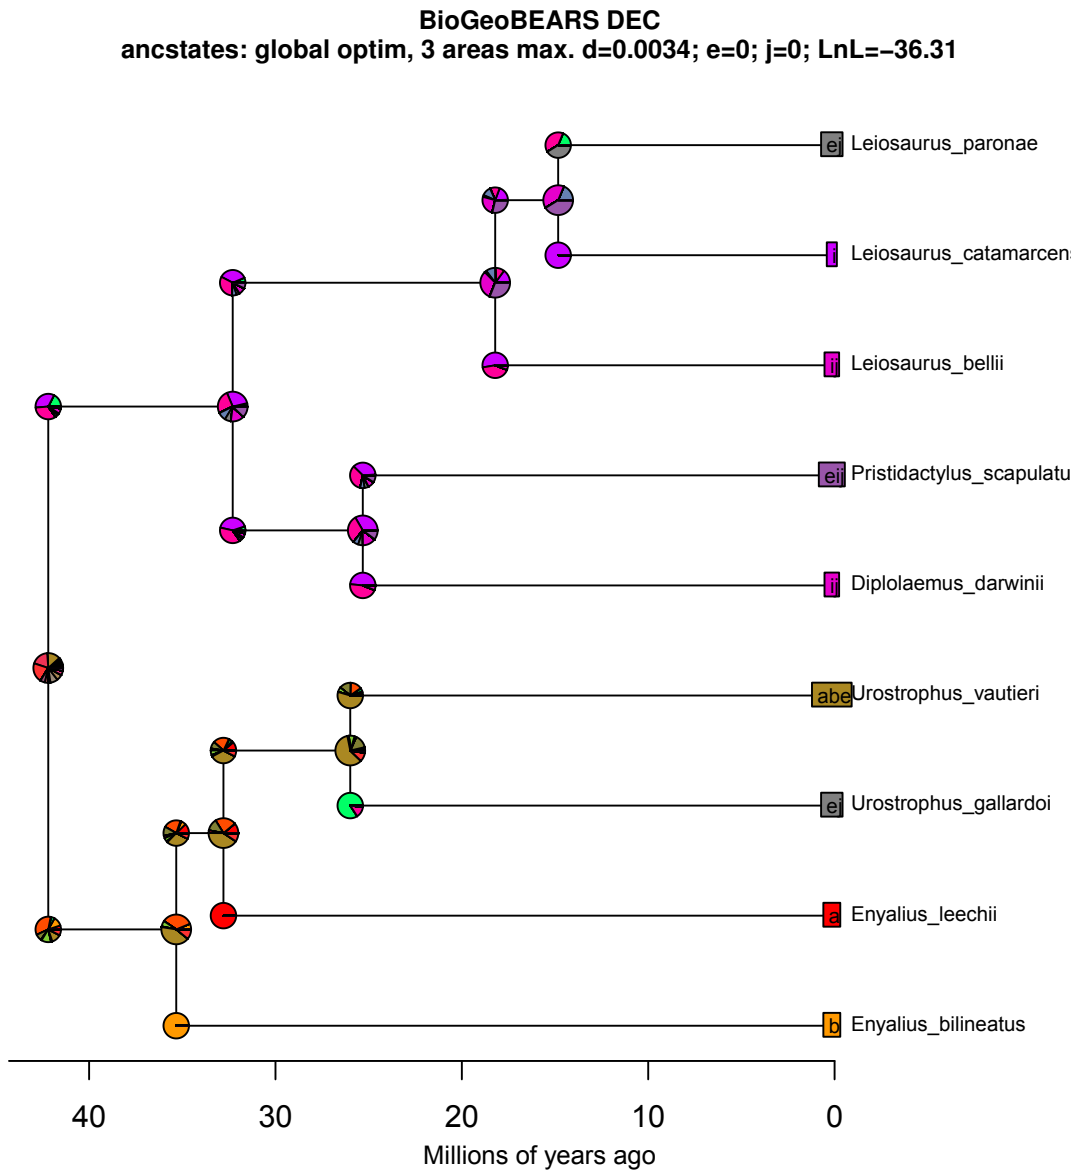

Figure S8: Clades of squamates

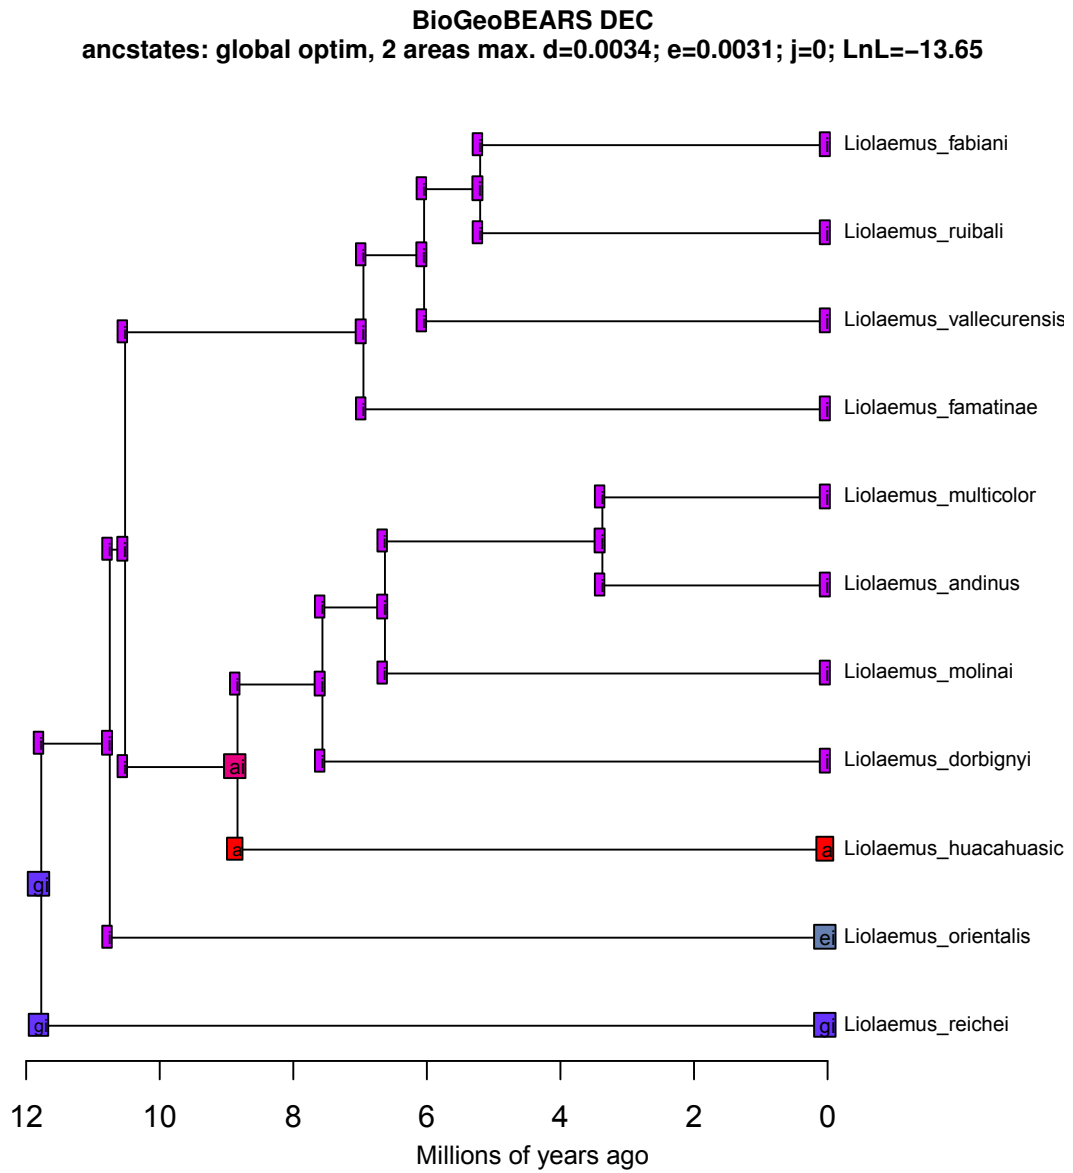

Figure S8: Clades of squamates

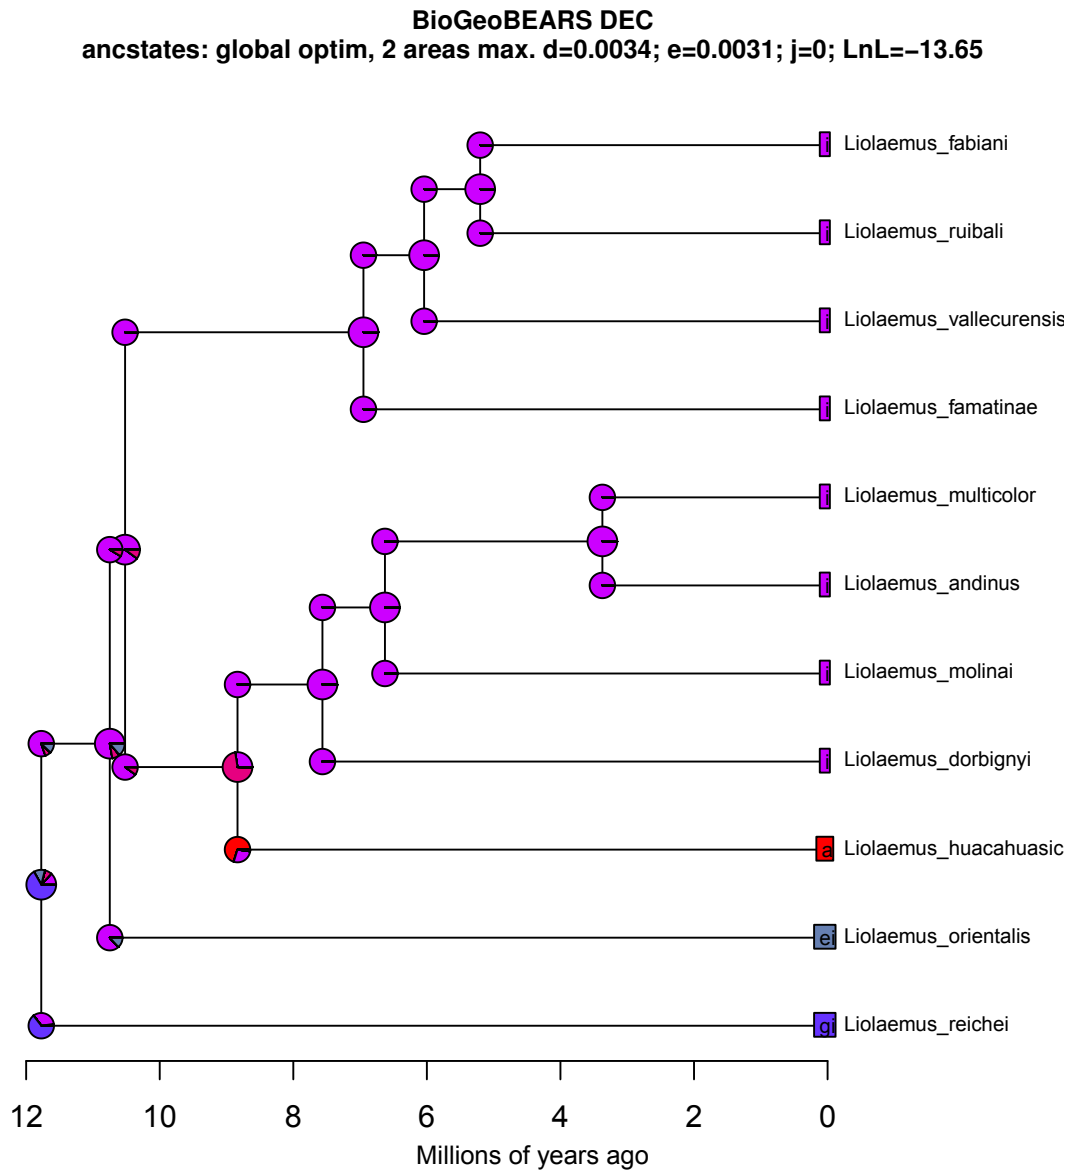

Figure S8: Clades of squamates

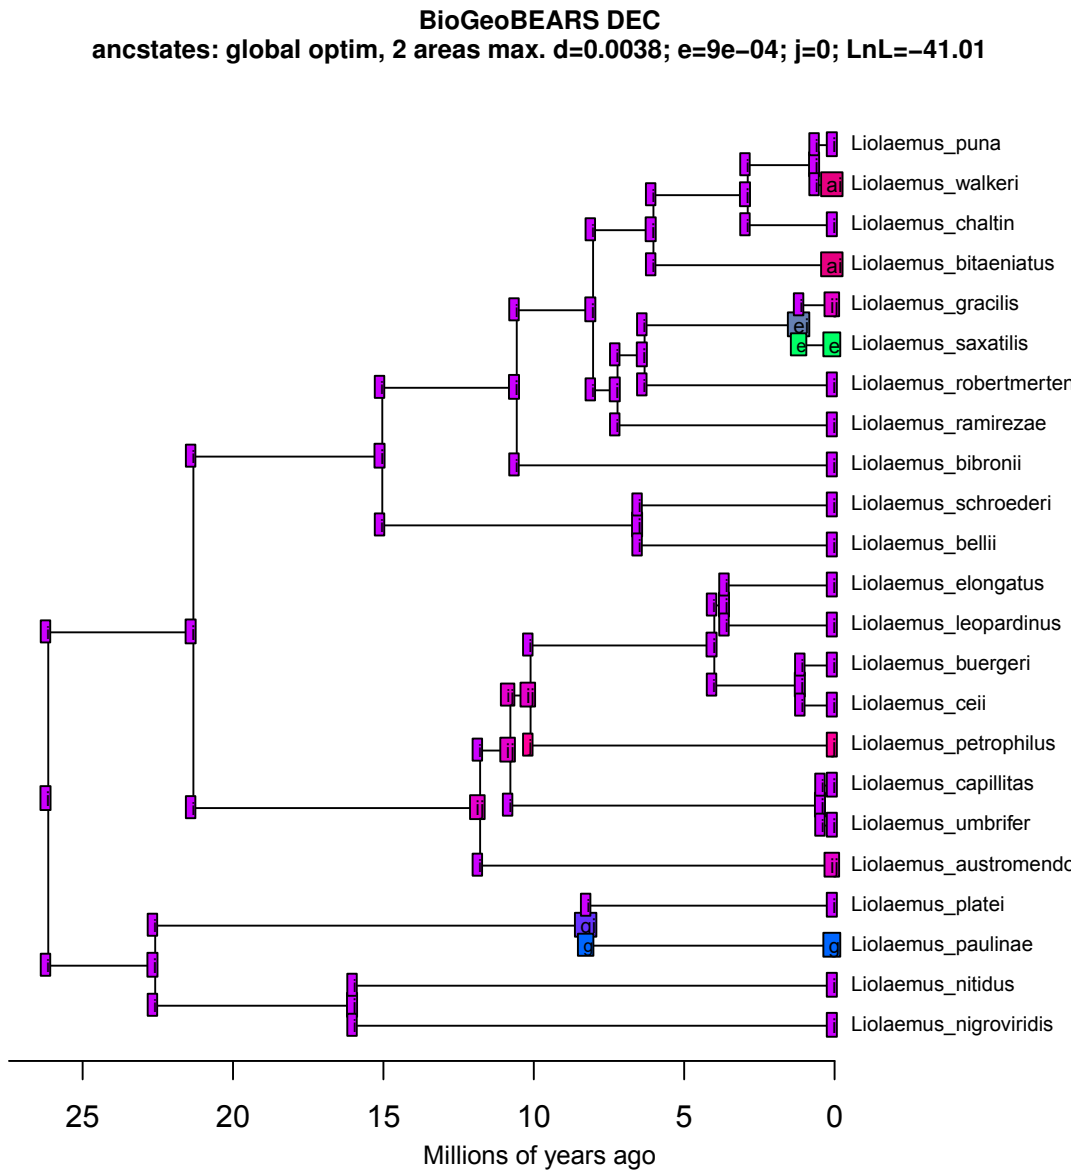

Figure S8: Clades of squamates

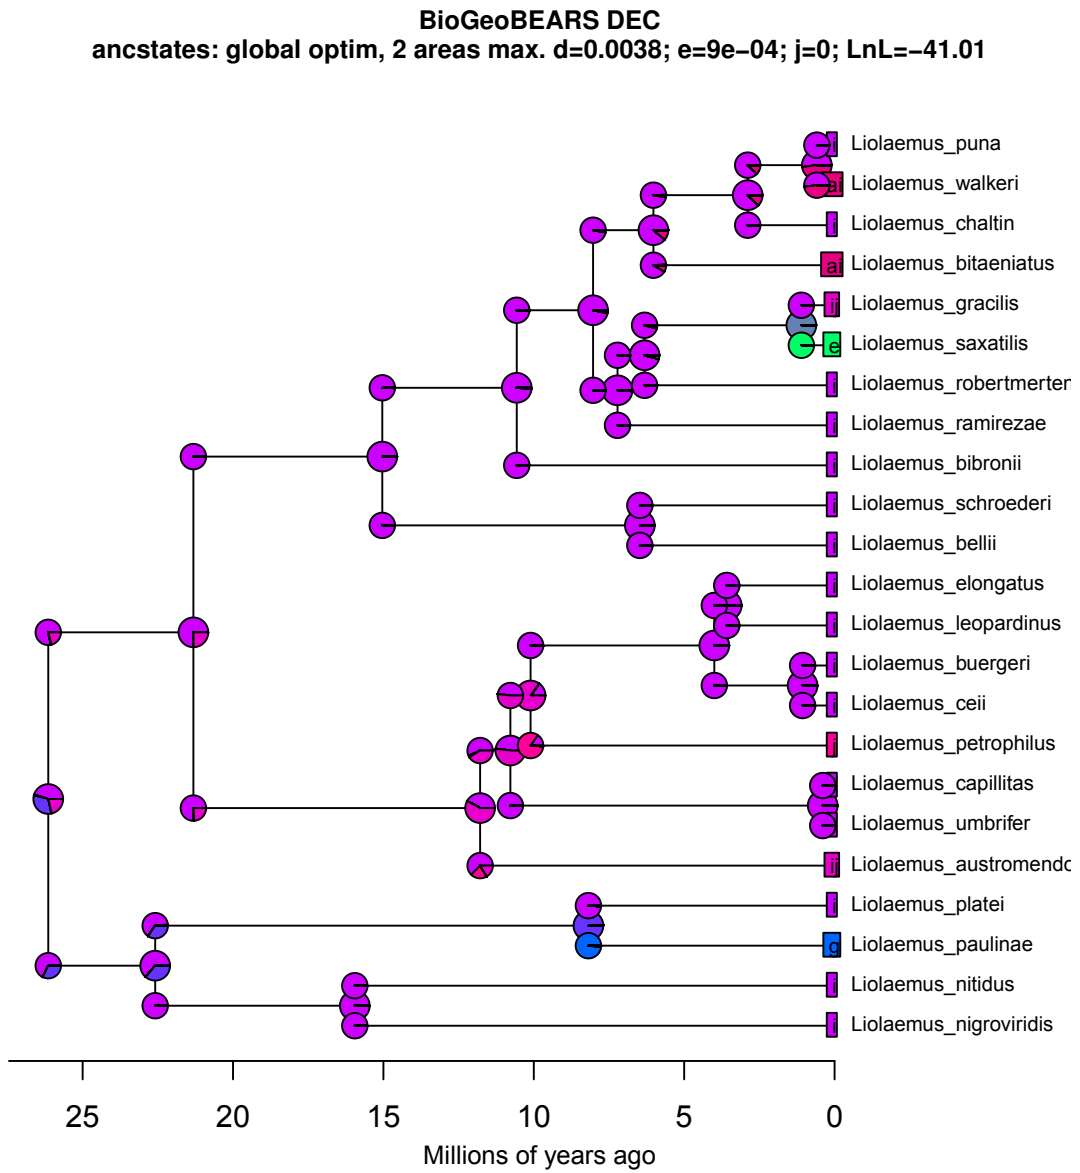

Figure S8: Clades of squamates

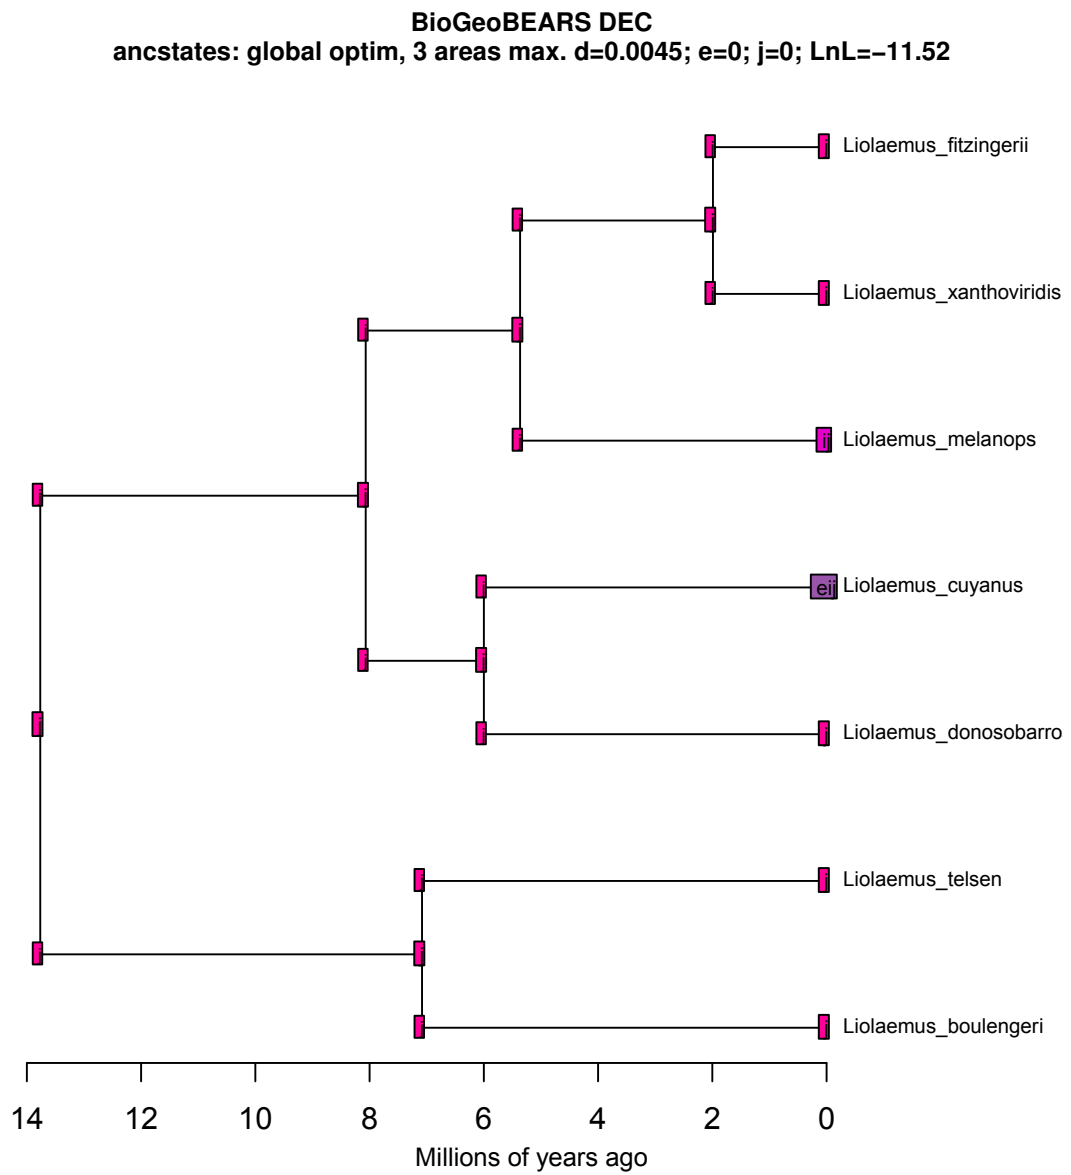



Figure S8: Clades of squamates

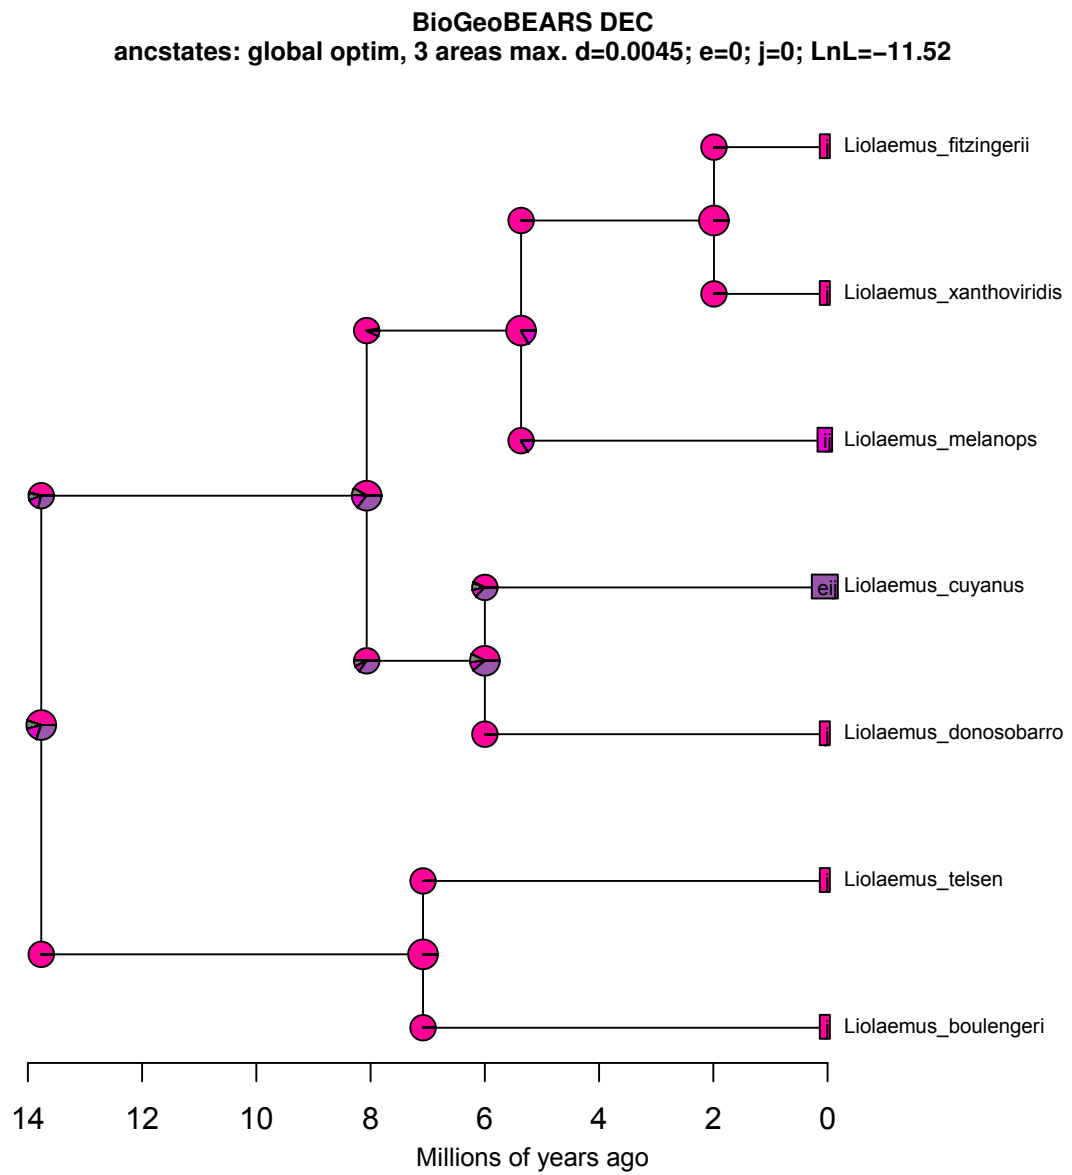

Figure S8: Clades of squamates

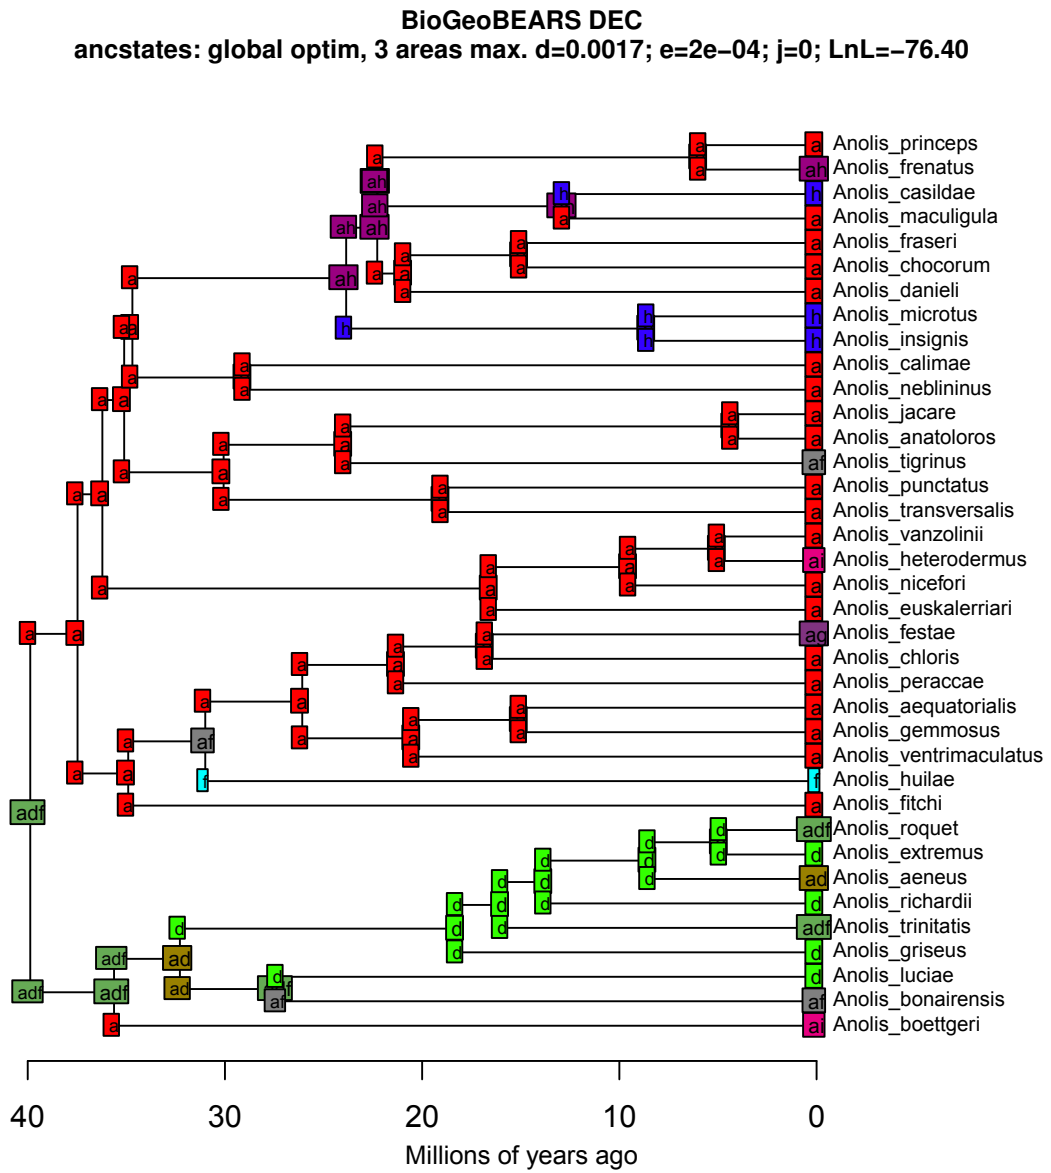

Figure S8: Clades of squamates

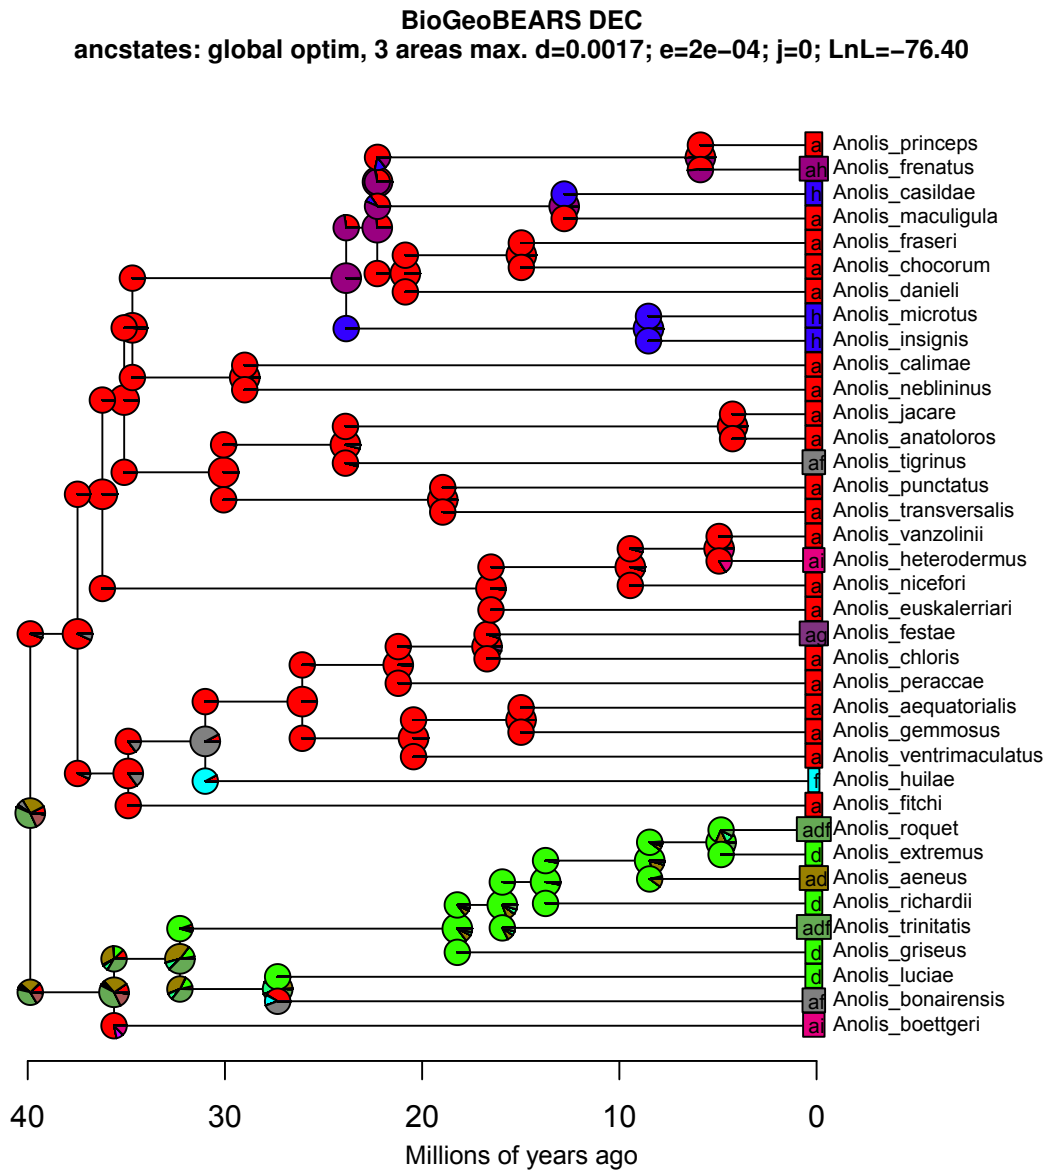

Figure S8: Clades of squamates

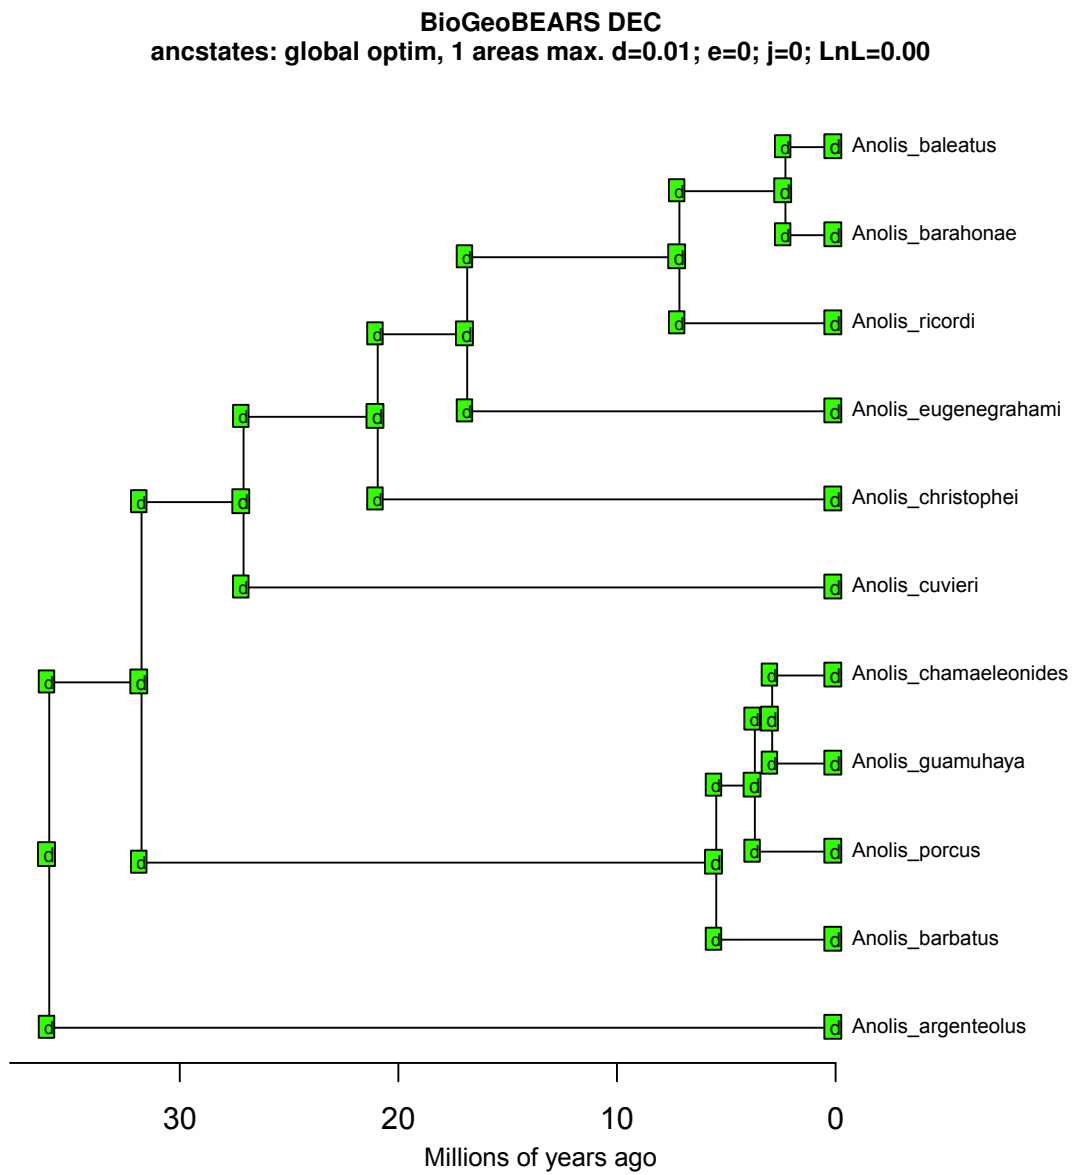

Figure S8: Clades of squamates

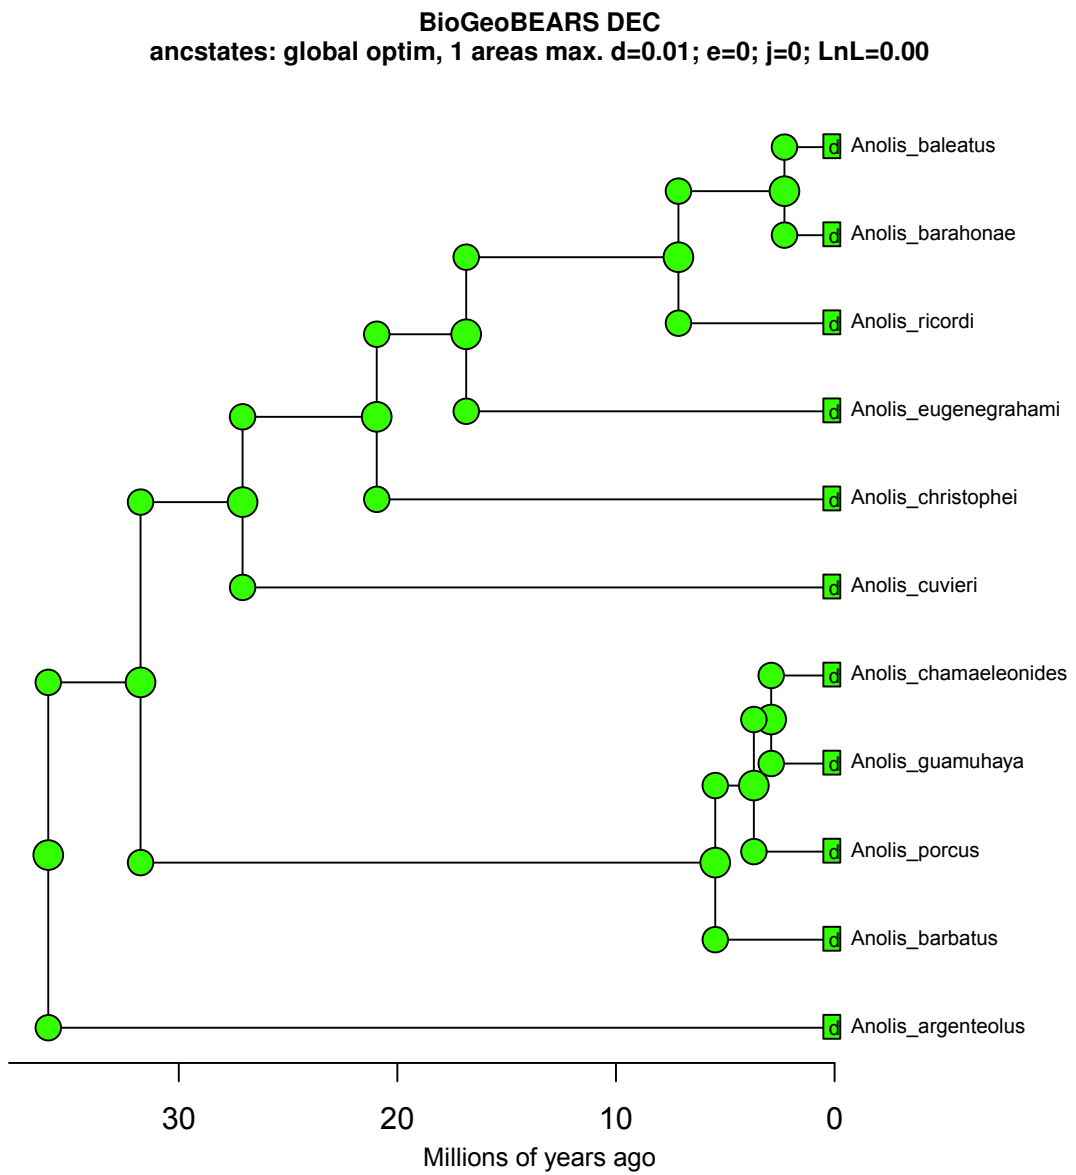

Figure S8: Clades of squamates

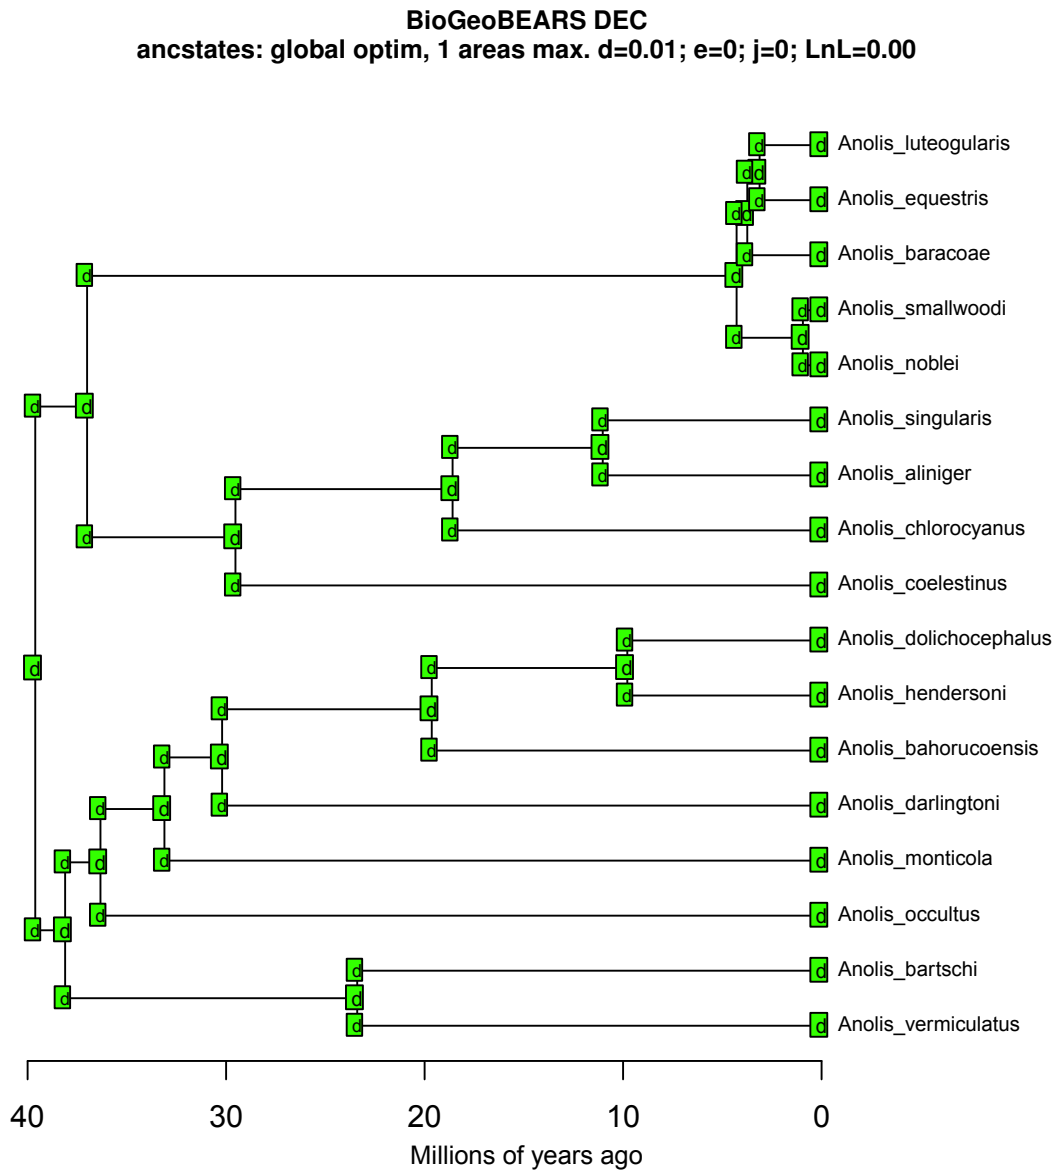

Figure S8: Clades of squamates

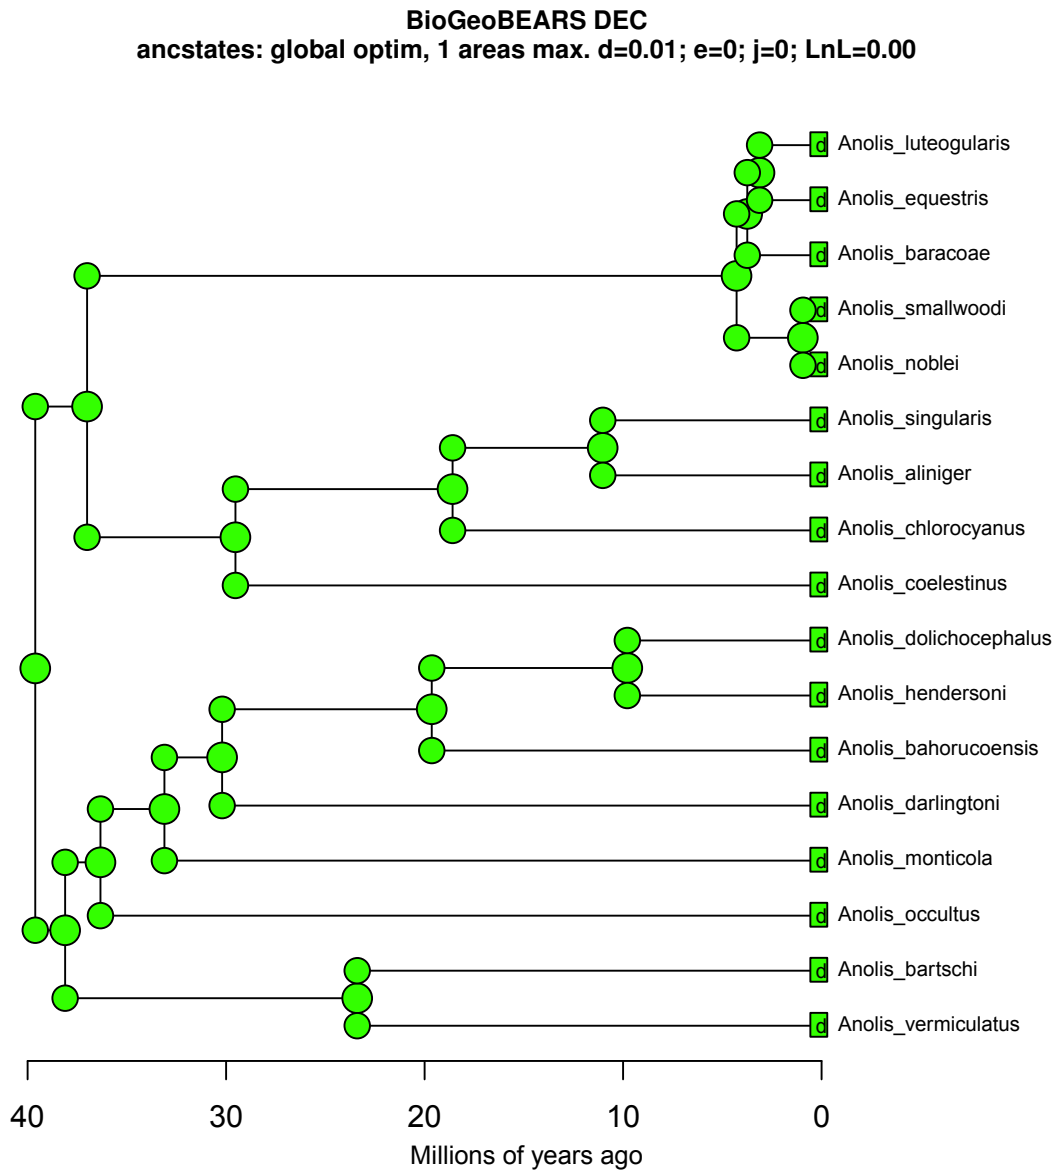

Figure S8: Clades of squamates

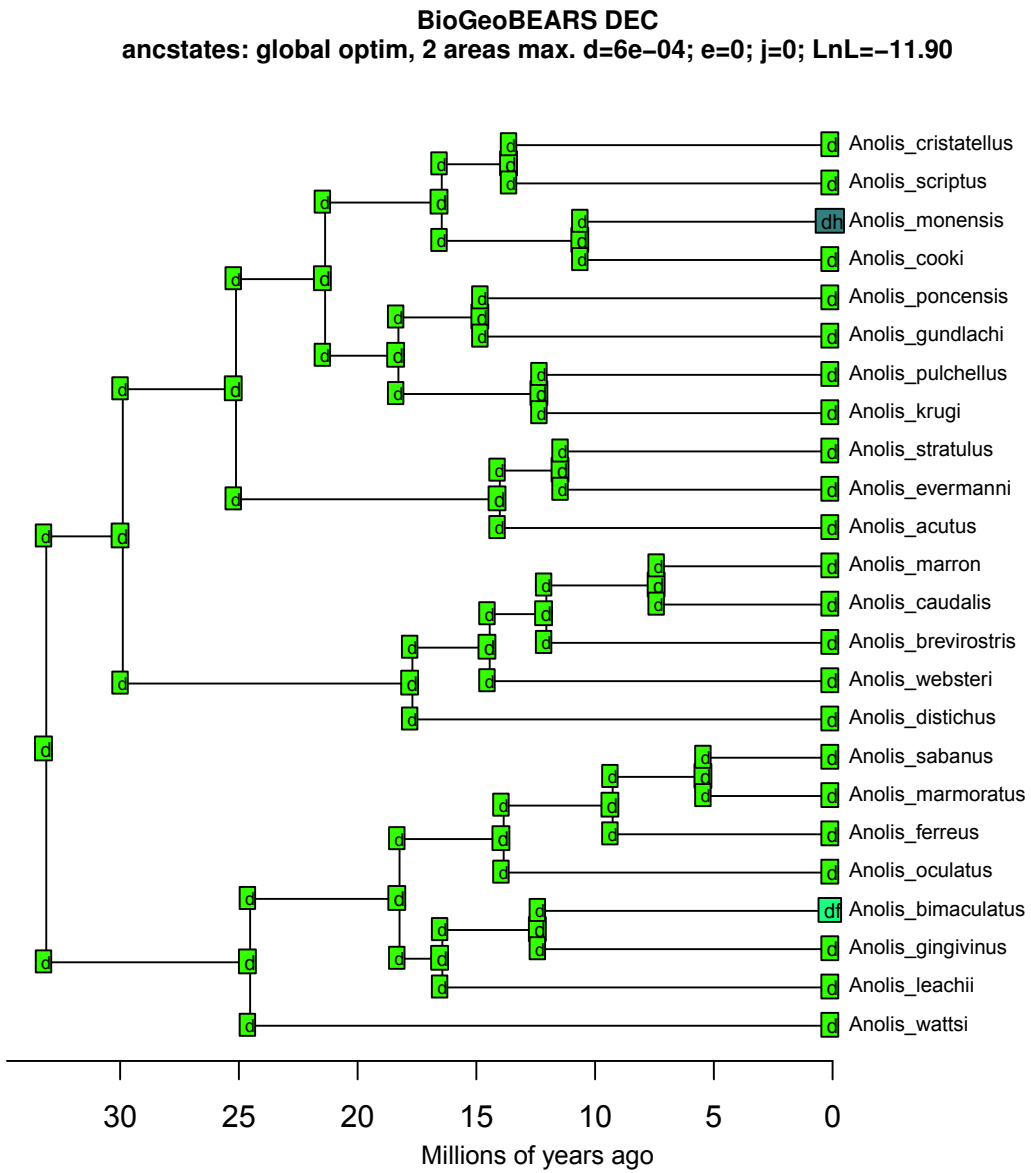



Figure S8: Clades of squamates

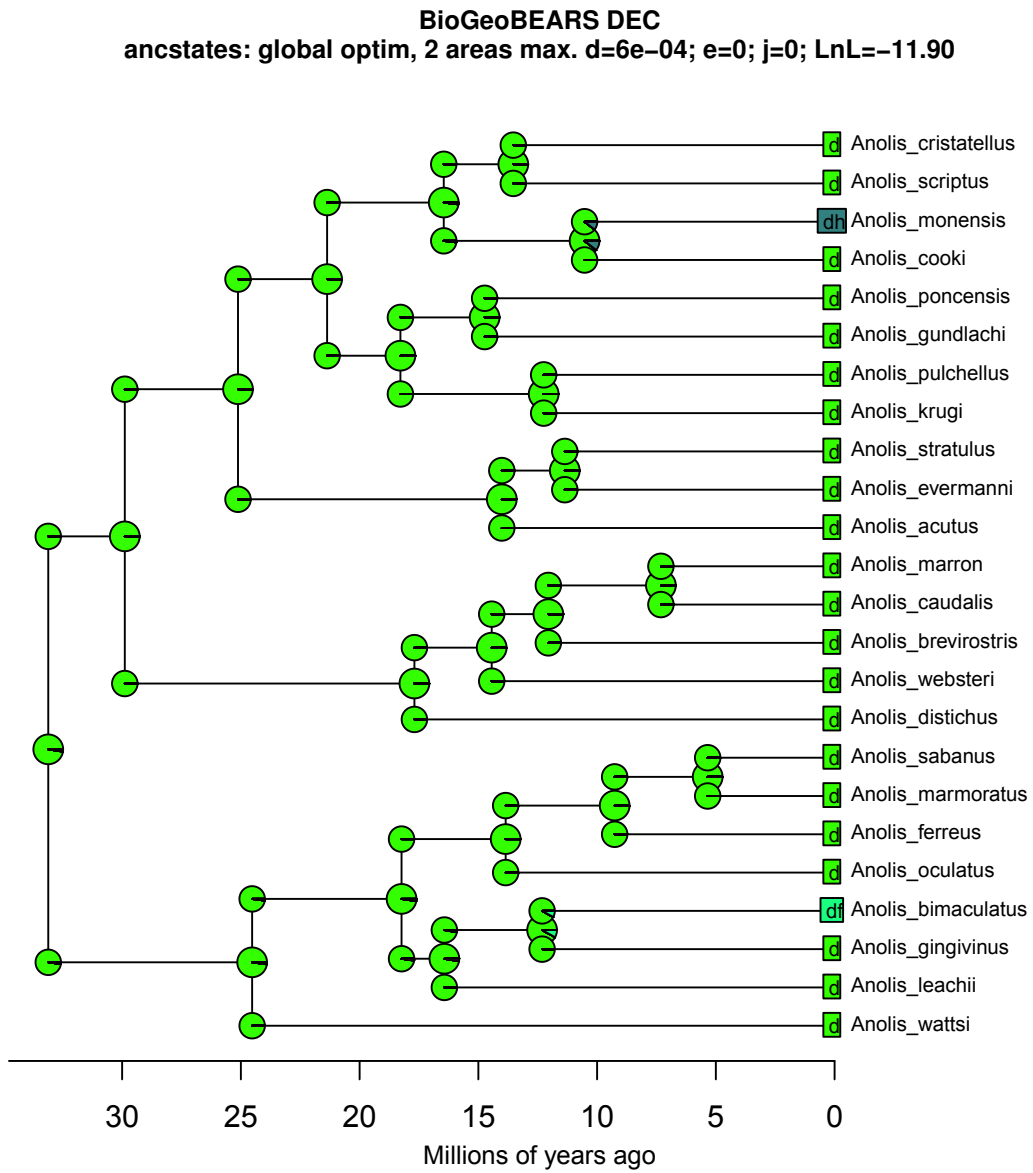

Fig. S9: Summary of biotic interchange (Time-stratified model)

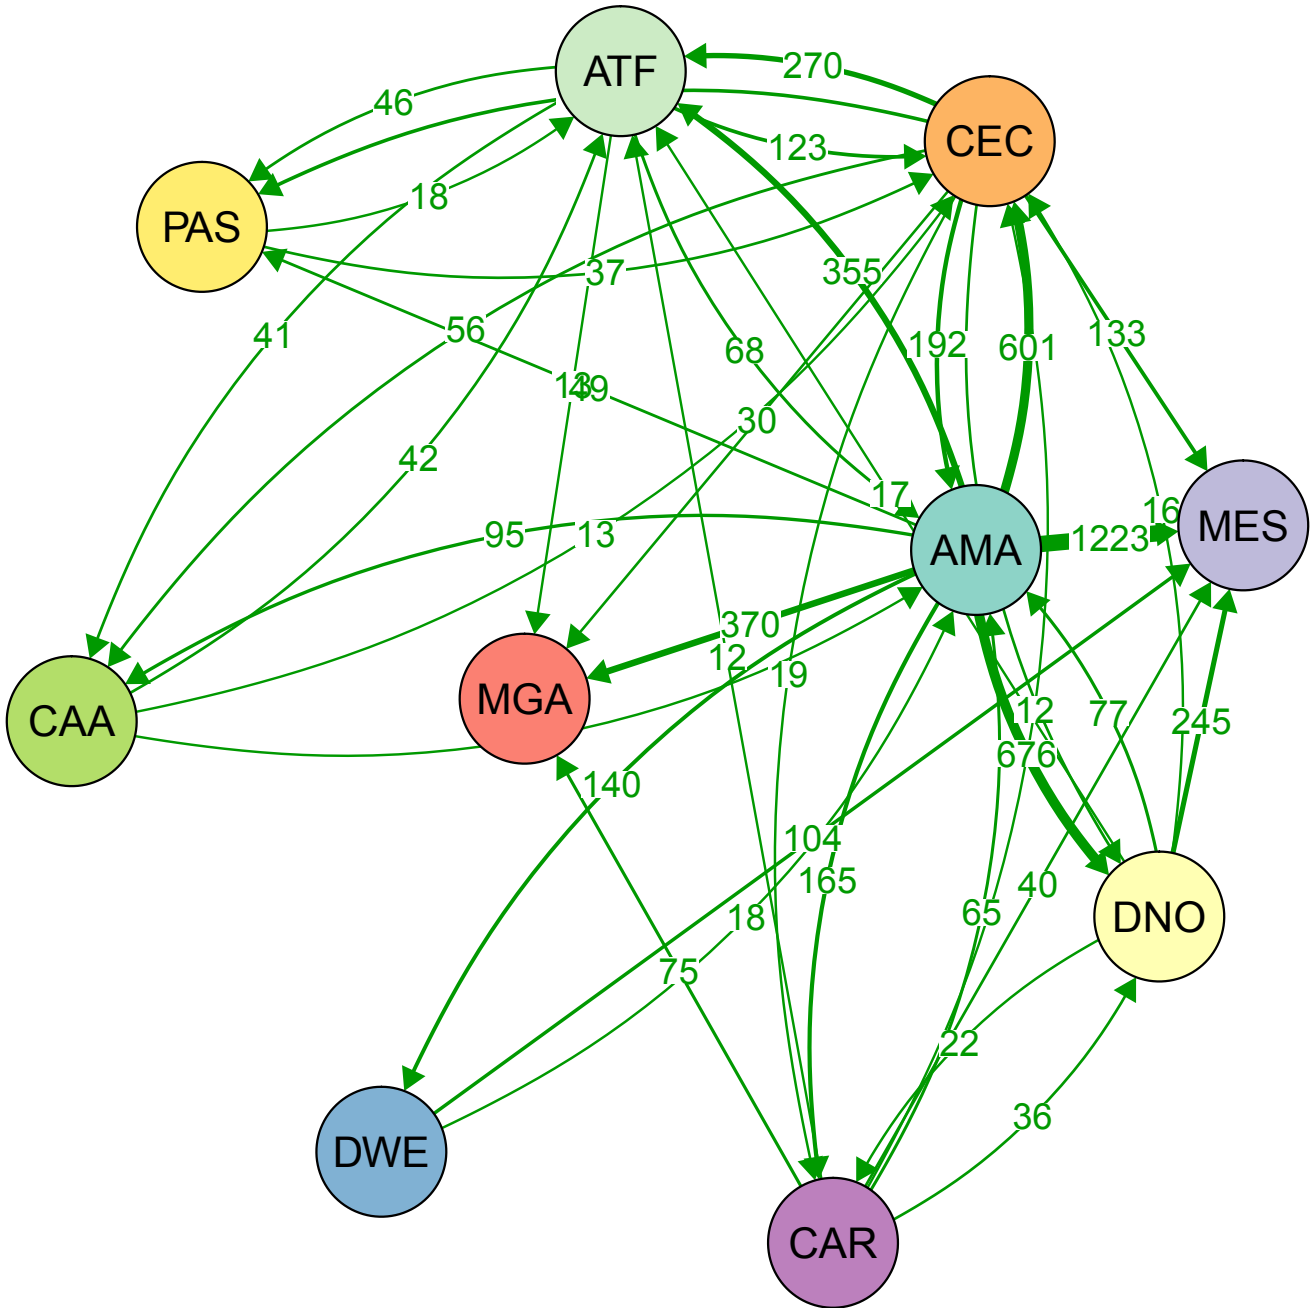

Fig. S10: Summary of biotic interchange per clade (Time-stratified model)

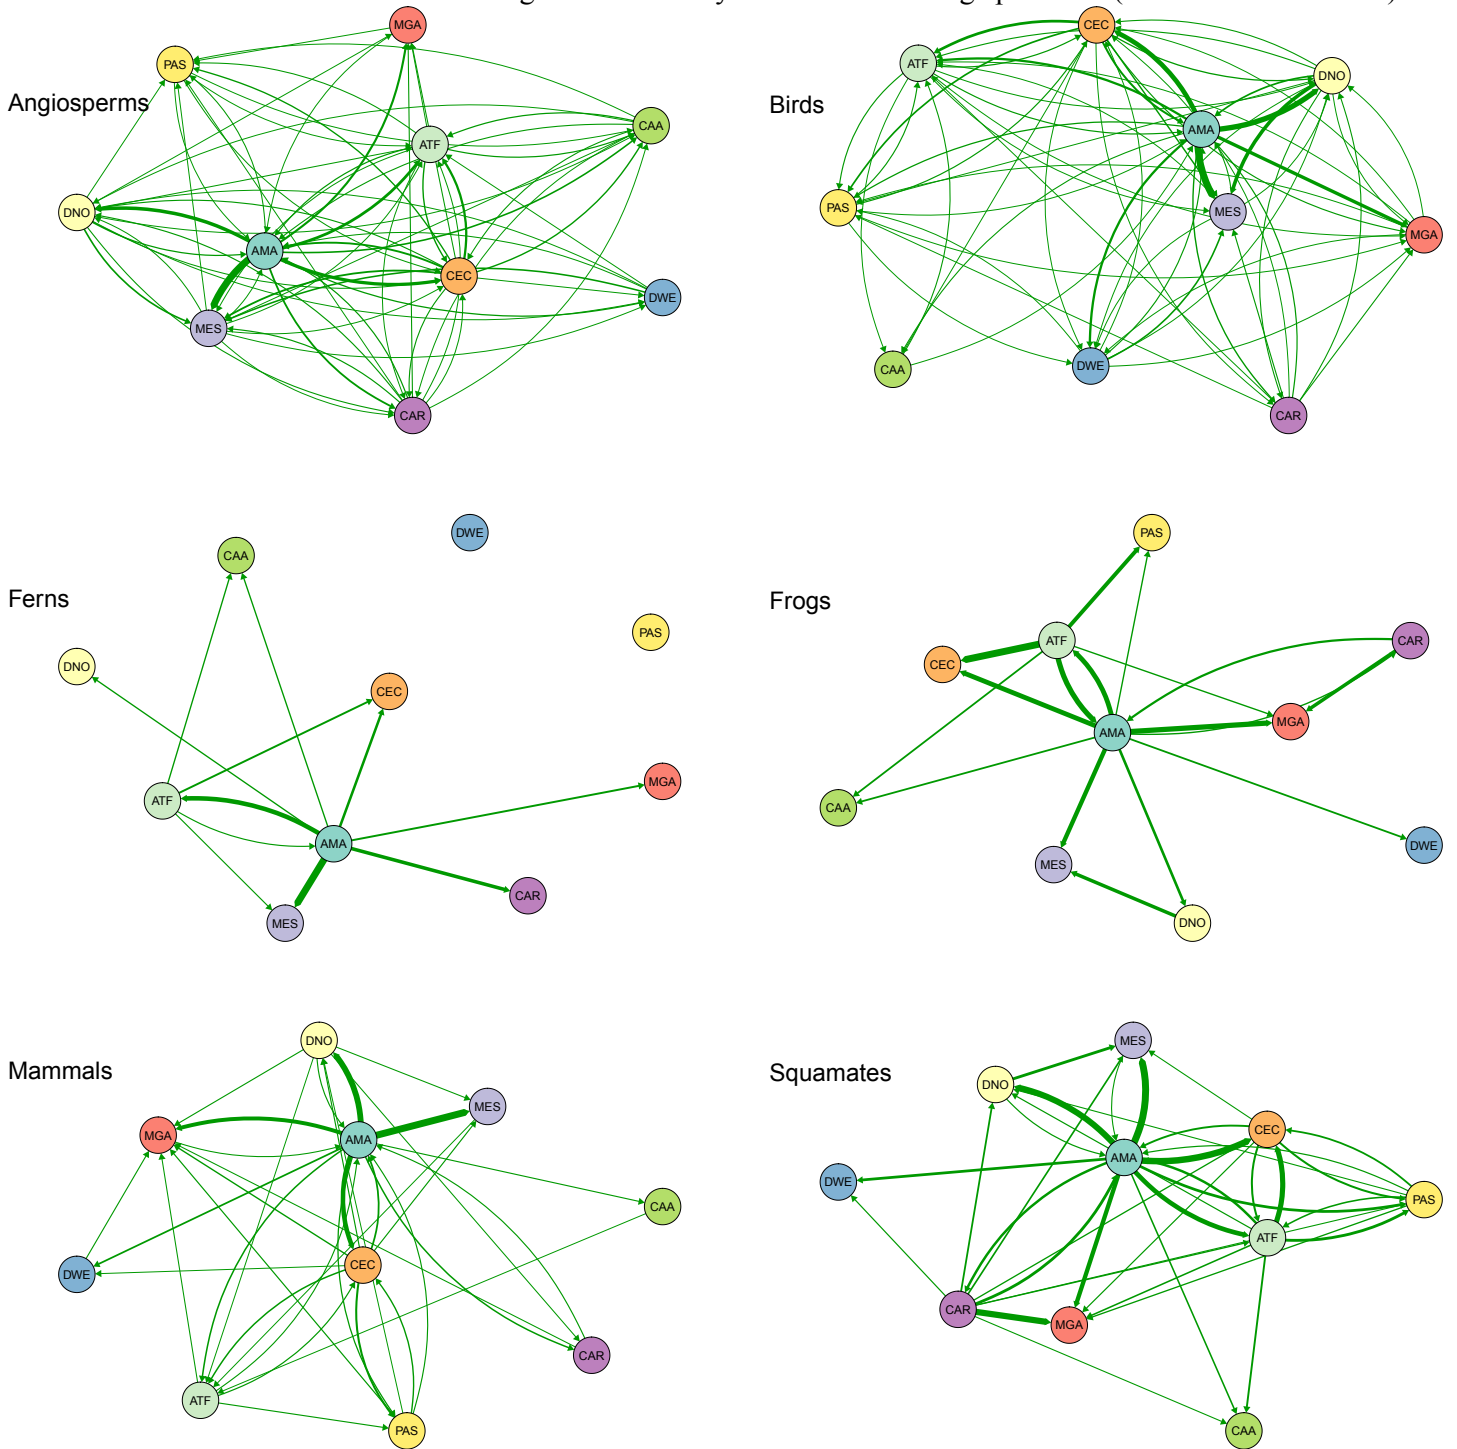

# Amazon

Fig. S11: Dispersals through time (Time-stratified model)

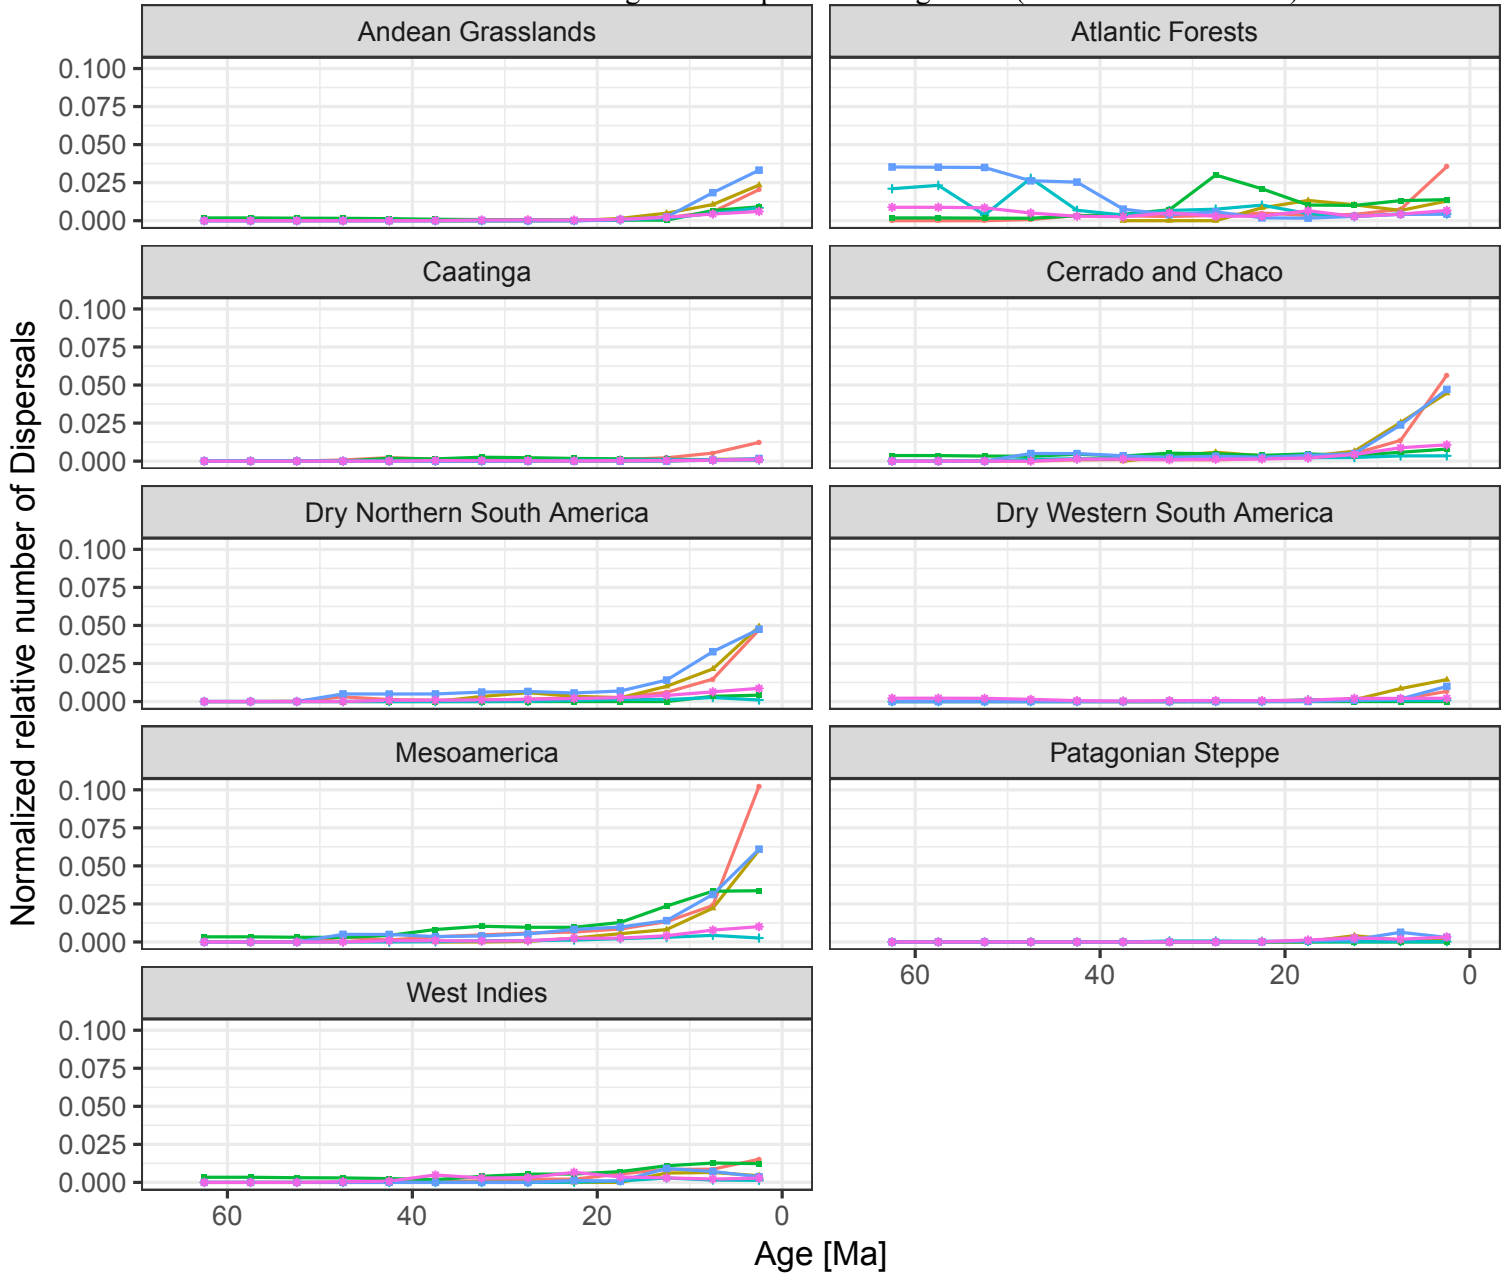

- Angiosperms
- Ferns
- Mammals
- ▲— Birds
- ▲— Frogs
- Squamates

# Atlantic Forests

Fig. S11: Dispersals through time (Time-stratified model)

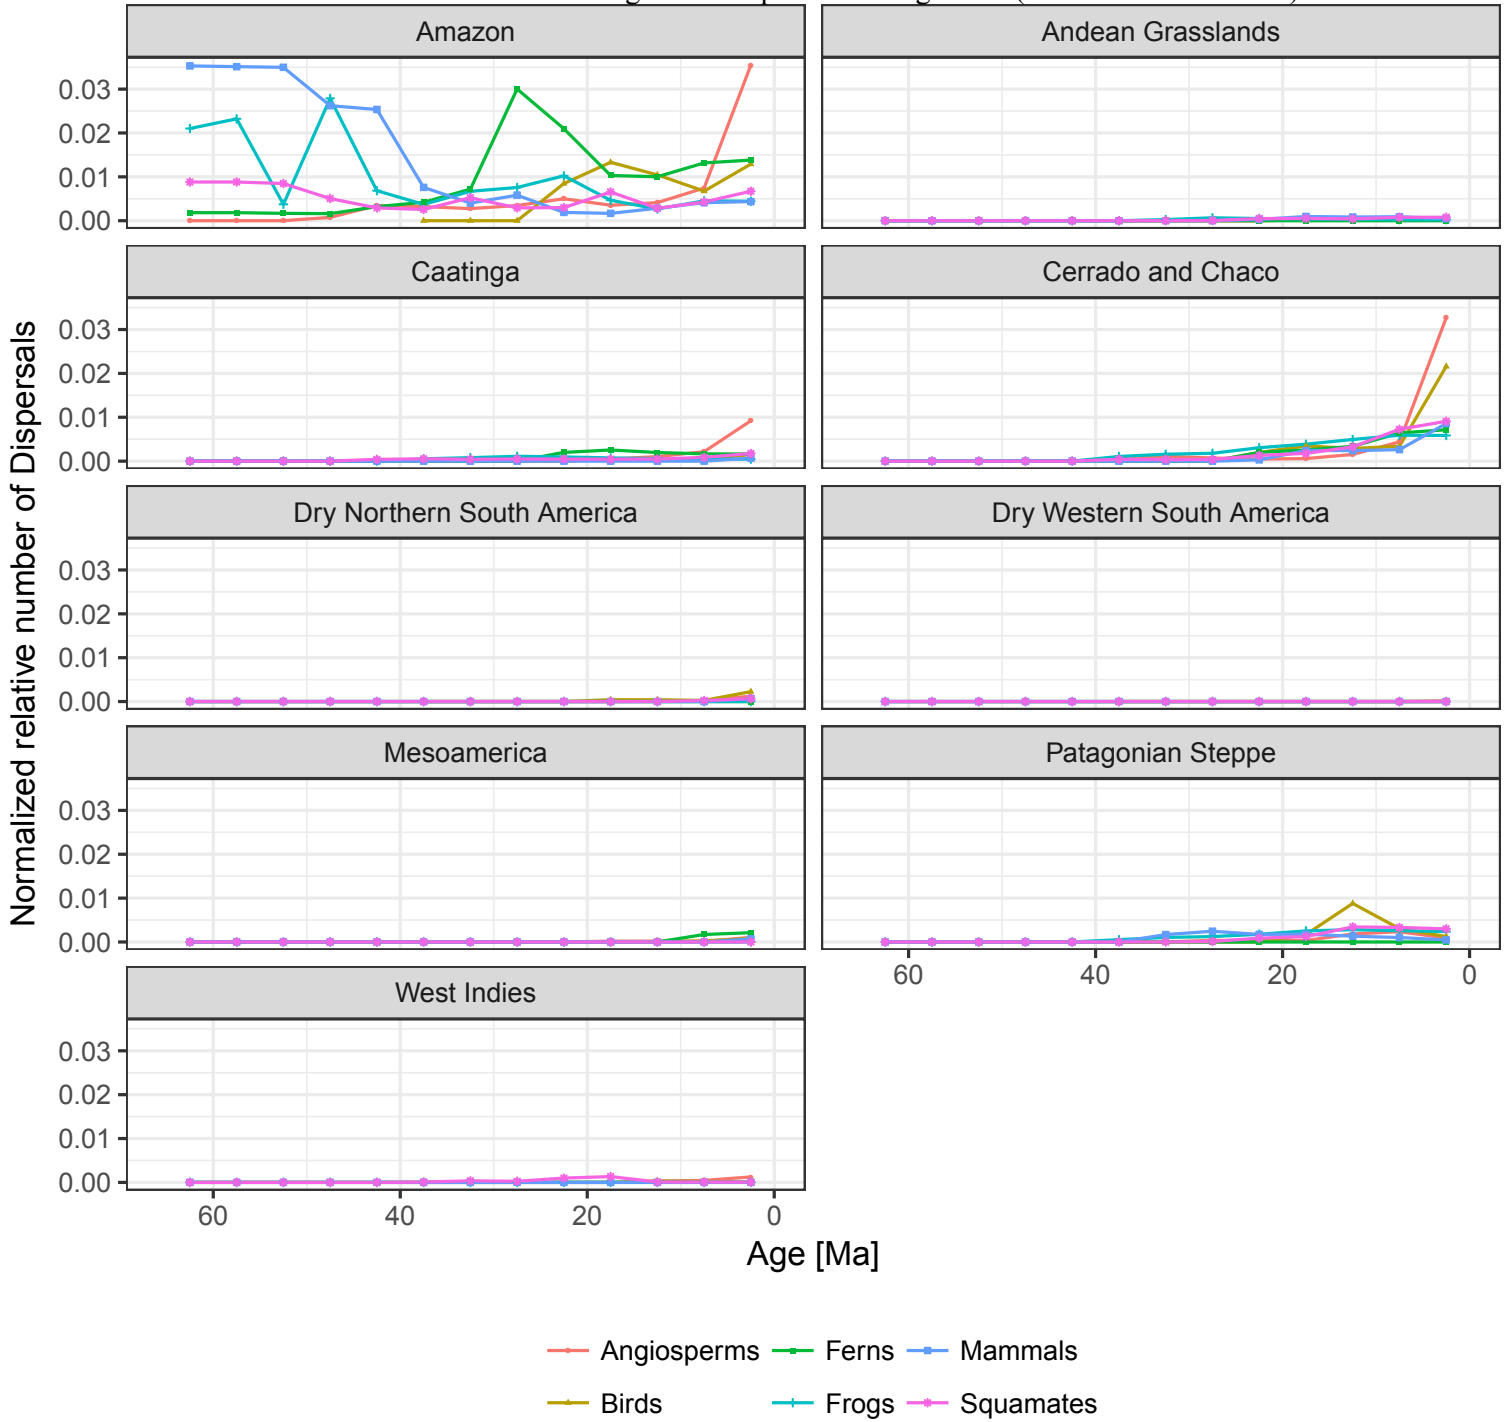

# Caatinga

Fig. S11: Dispersals through time (Time-stratified model)

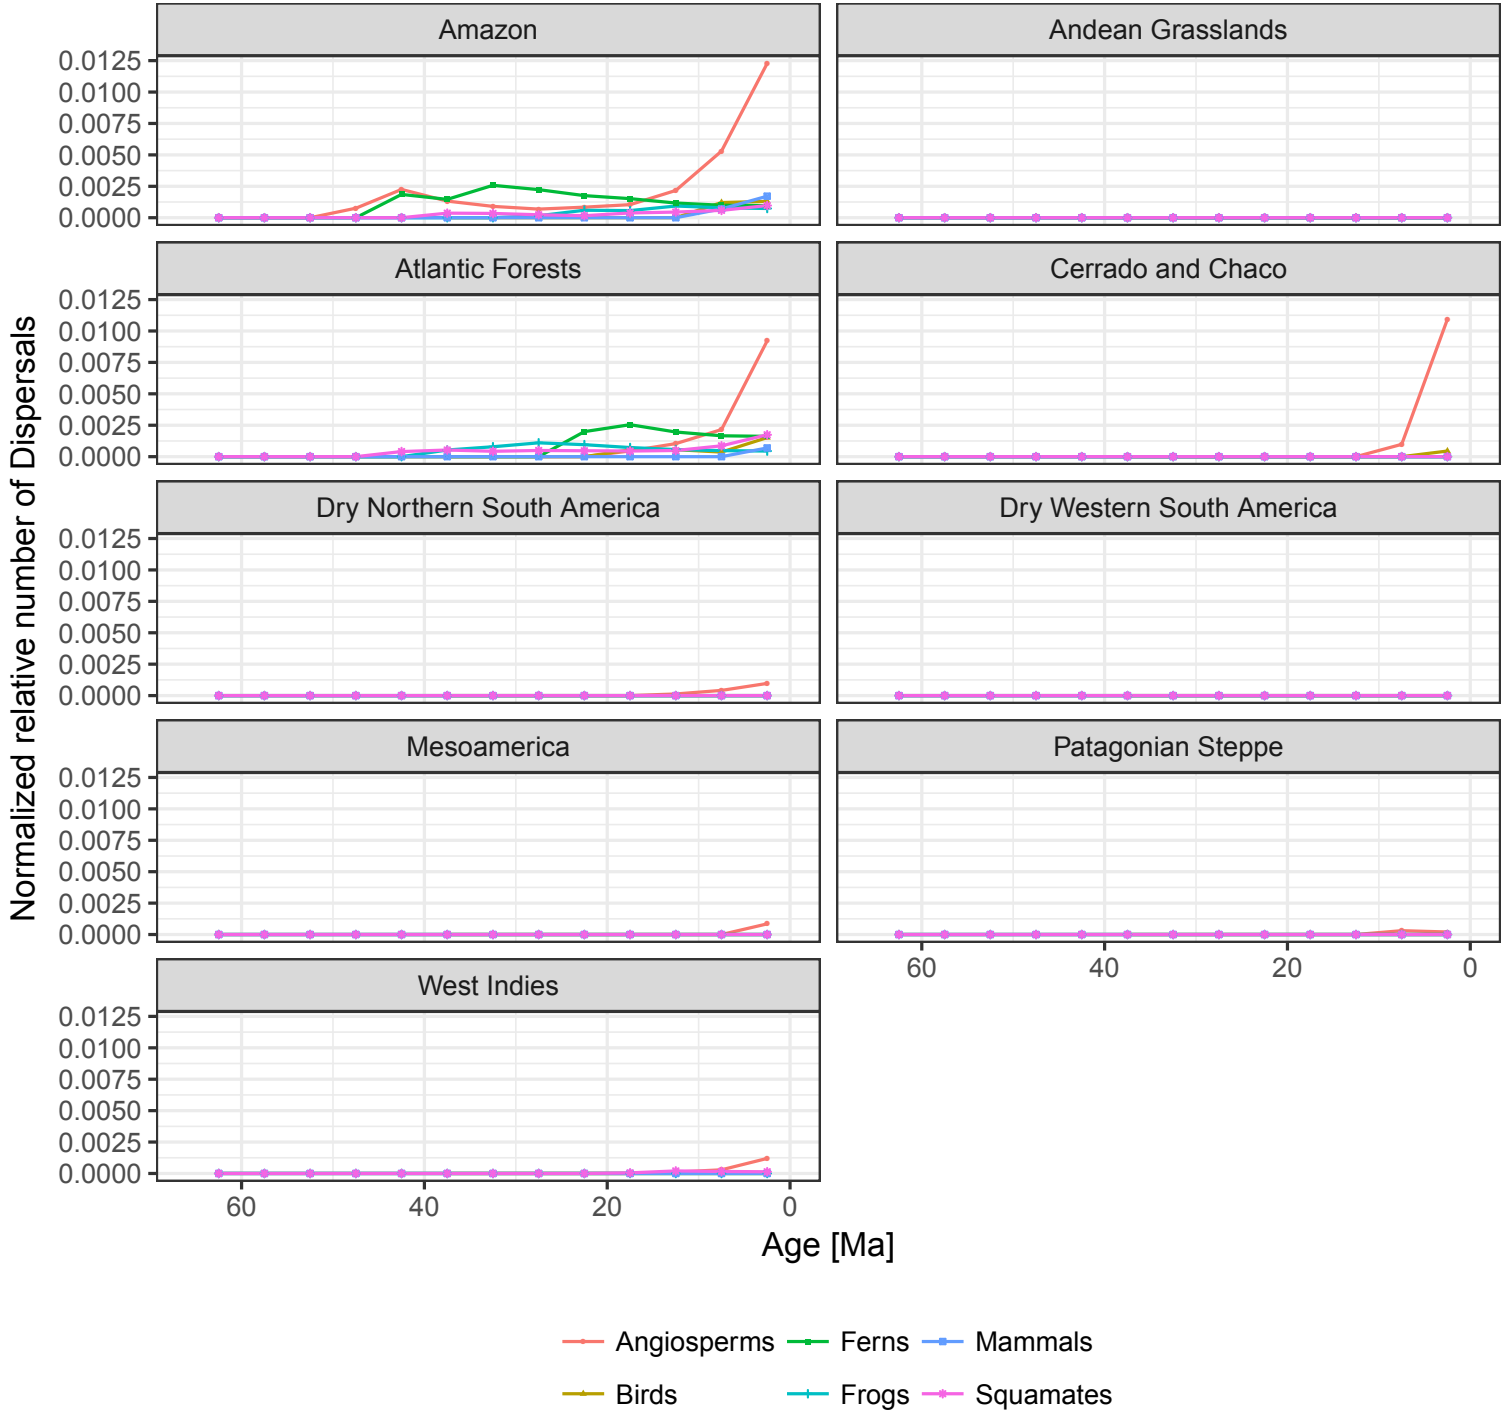

# West Indies

Fig. S11: Dispersals through time (Time-stratified model)

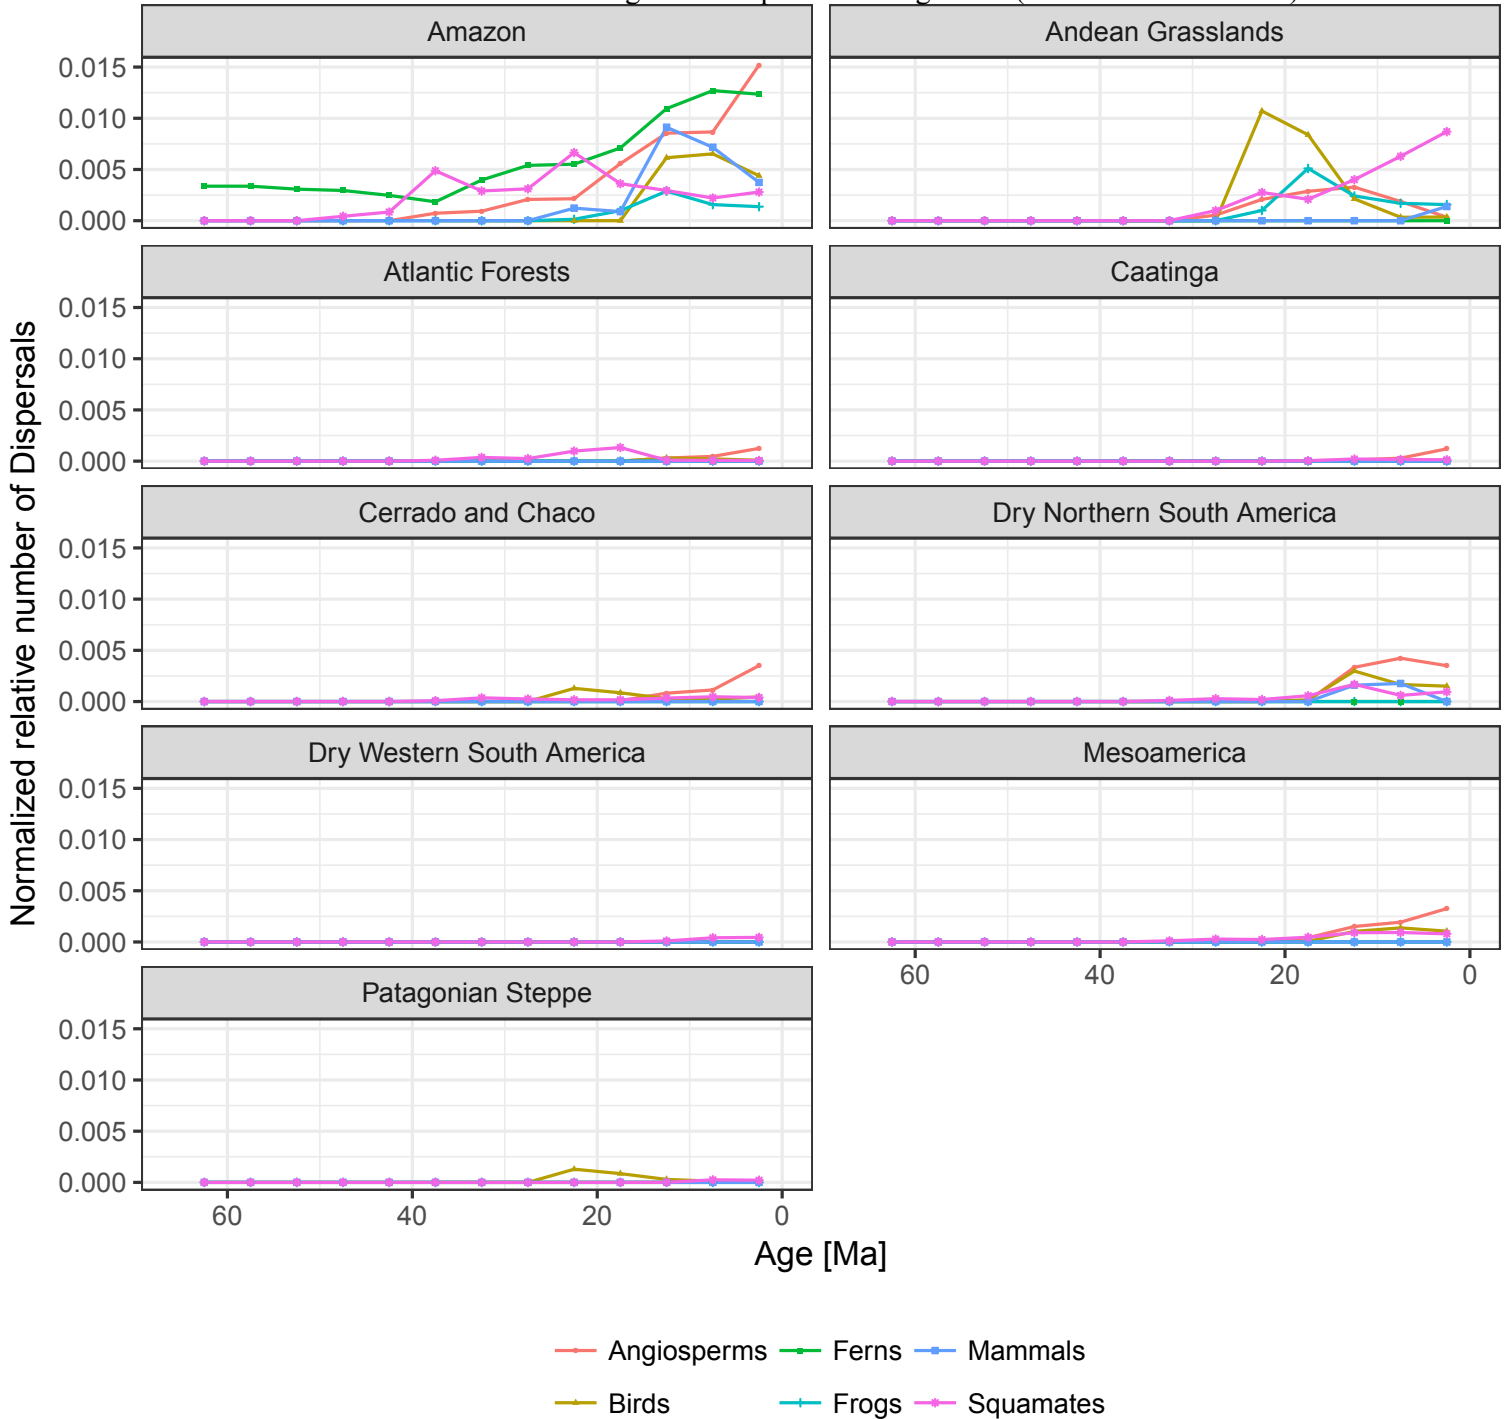

Cerrado and Chaco

Fig. S11: Dispersals through time (Time-stratified model)

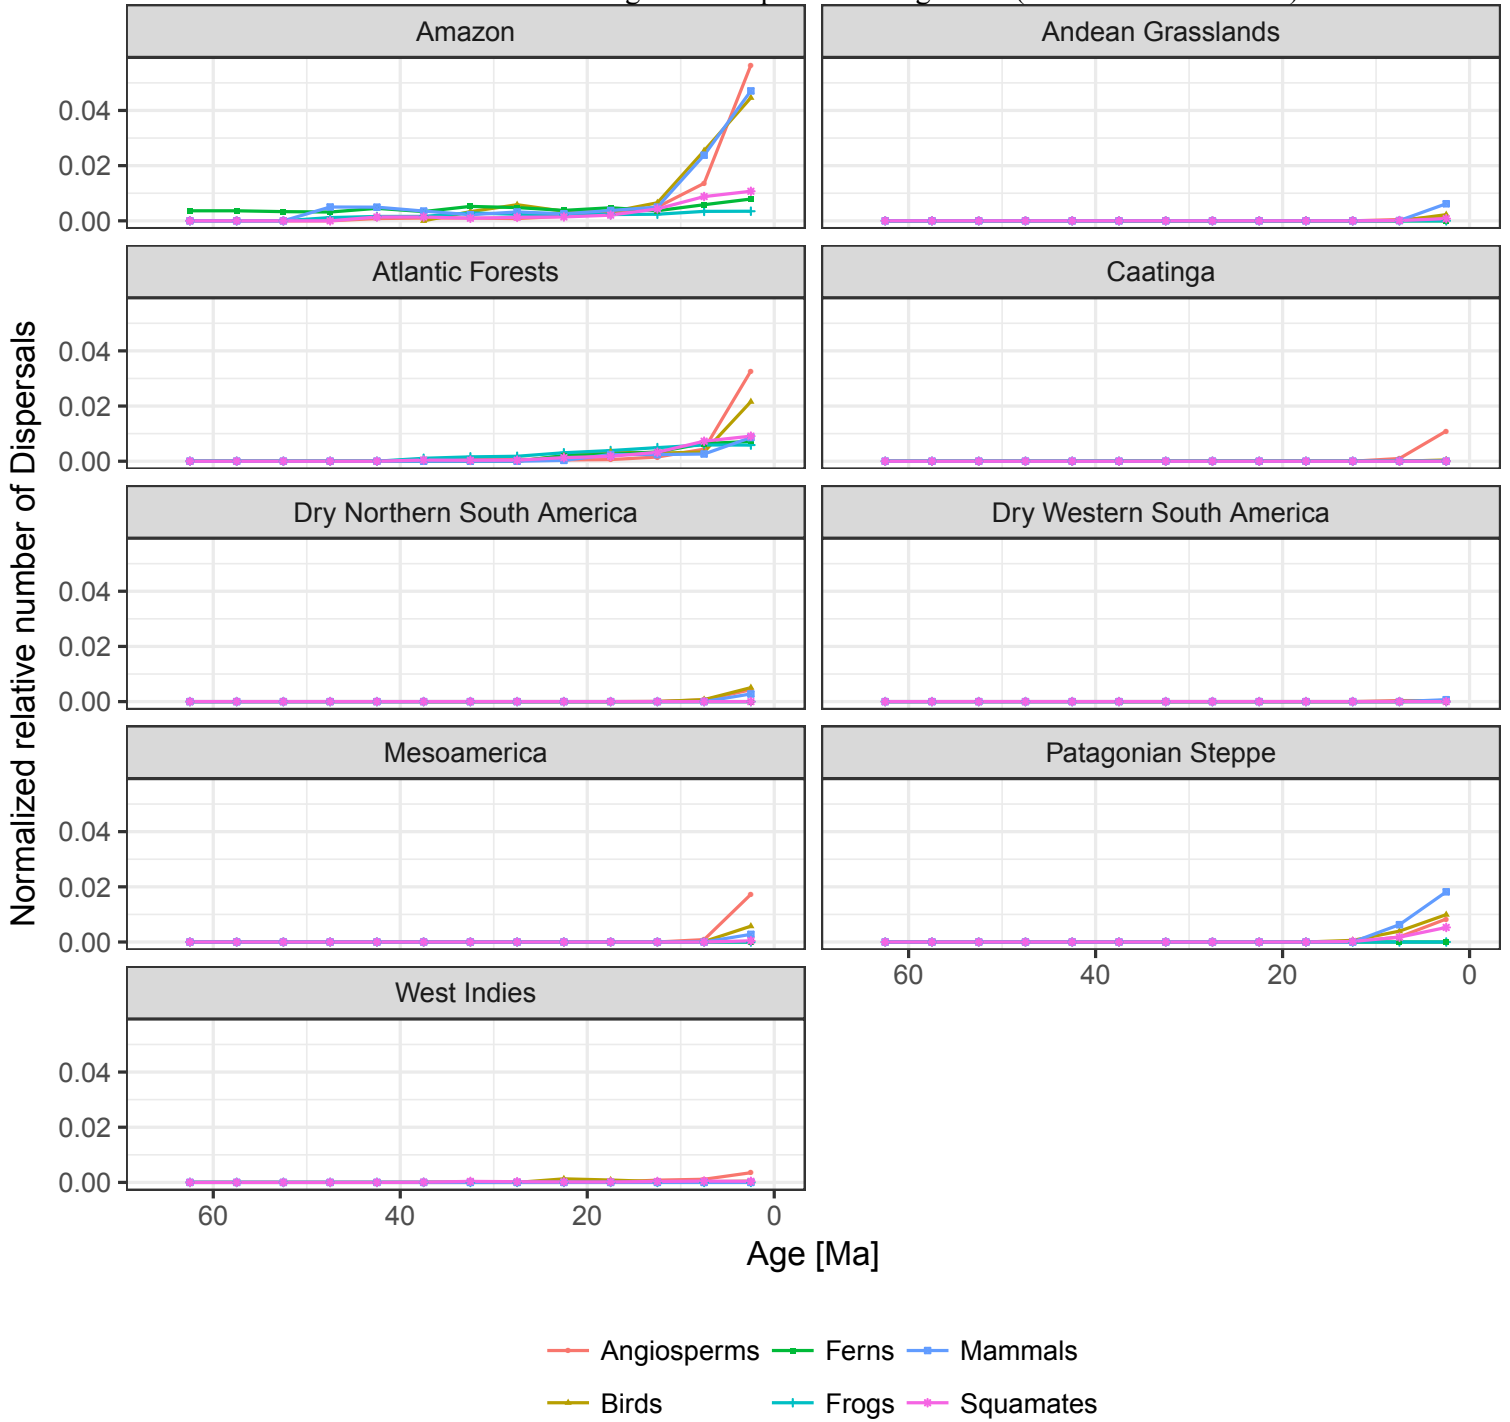



# Dry Northern South America

Fig. S11: Dispersals through time (Time-stratified model)

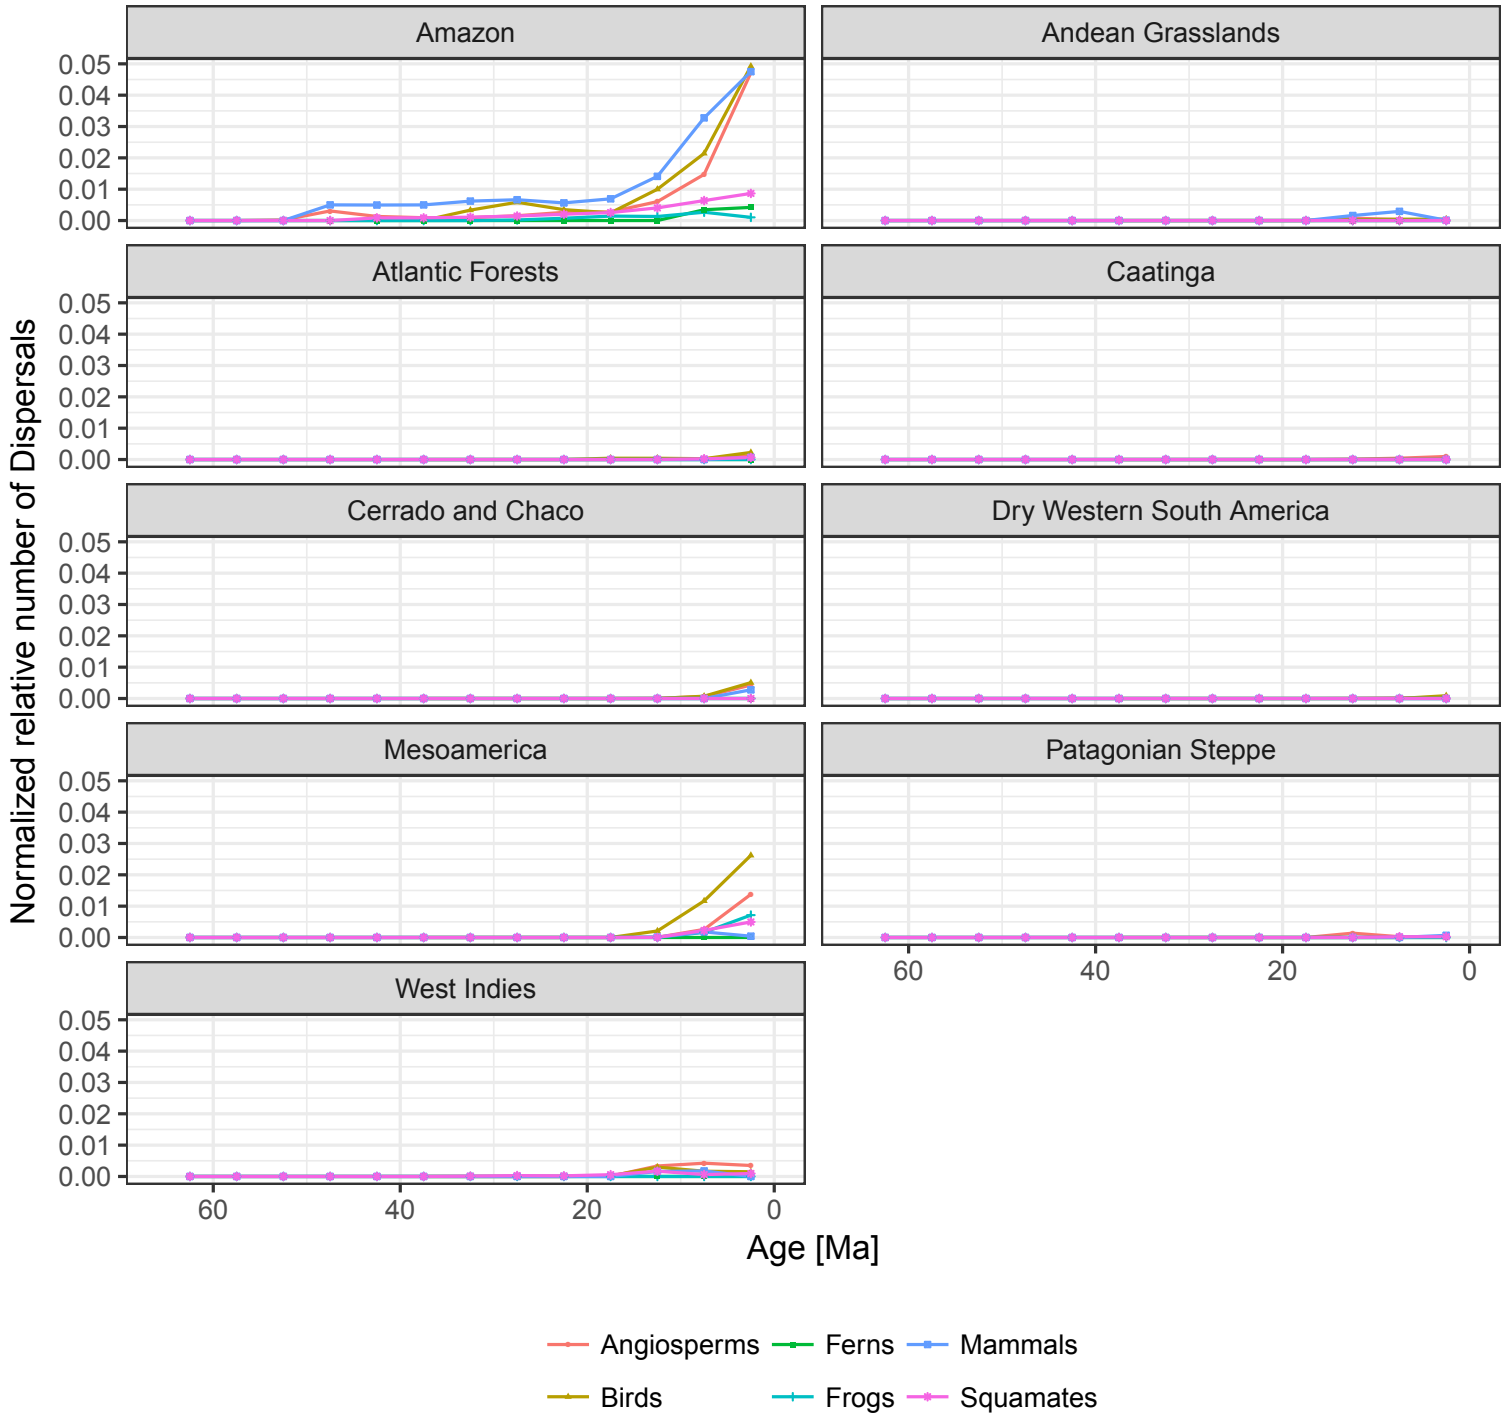

# Dry Western South America

Fig. S11: Dispersals through time (Time-stratified model)

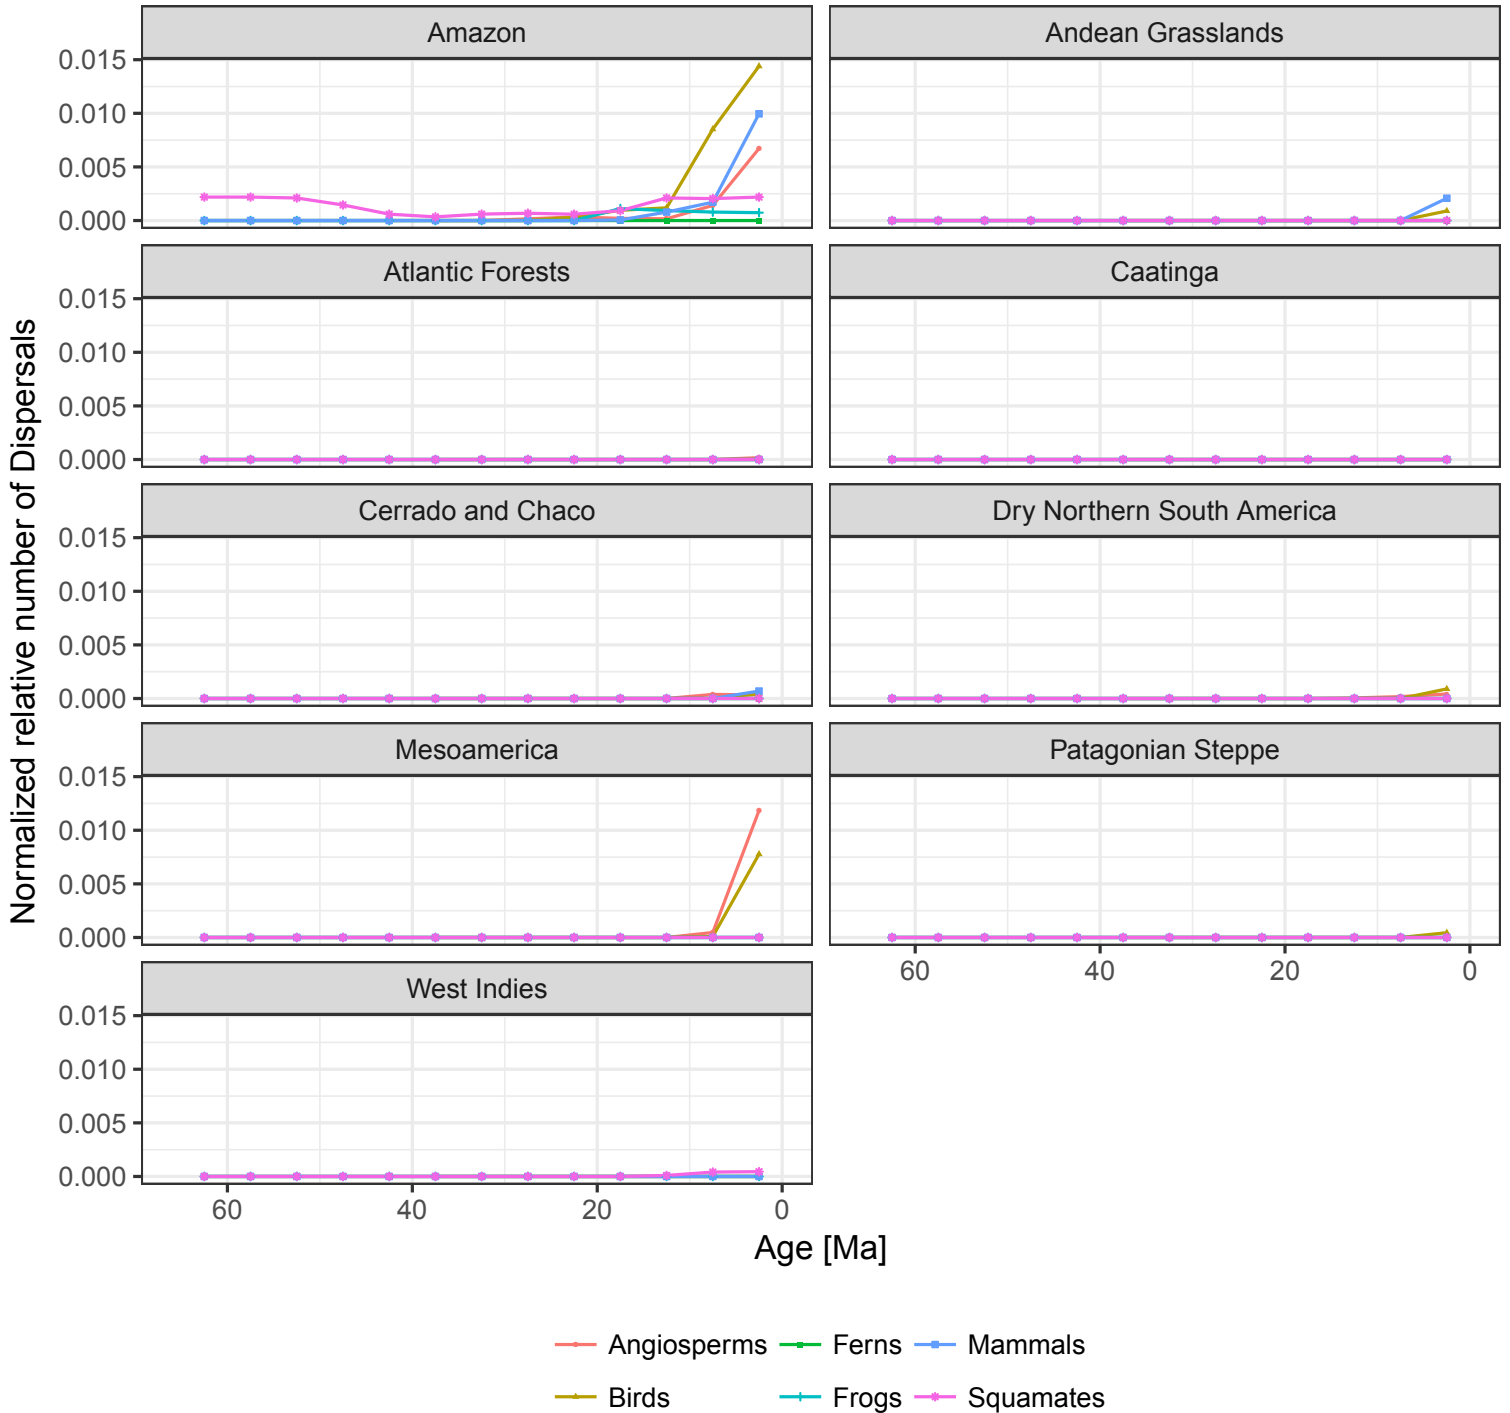

Mesoamerica

Fig. S11: Dispersals through time (Time-stratified model)

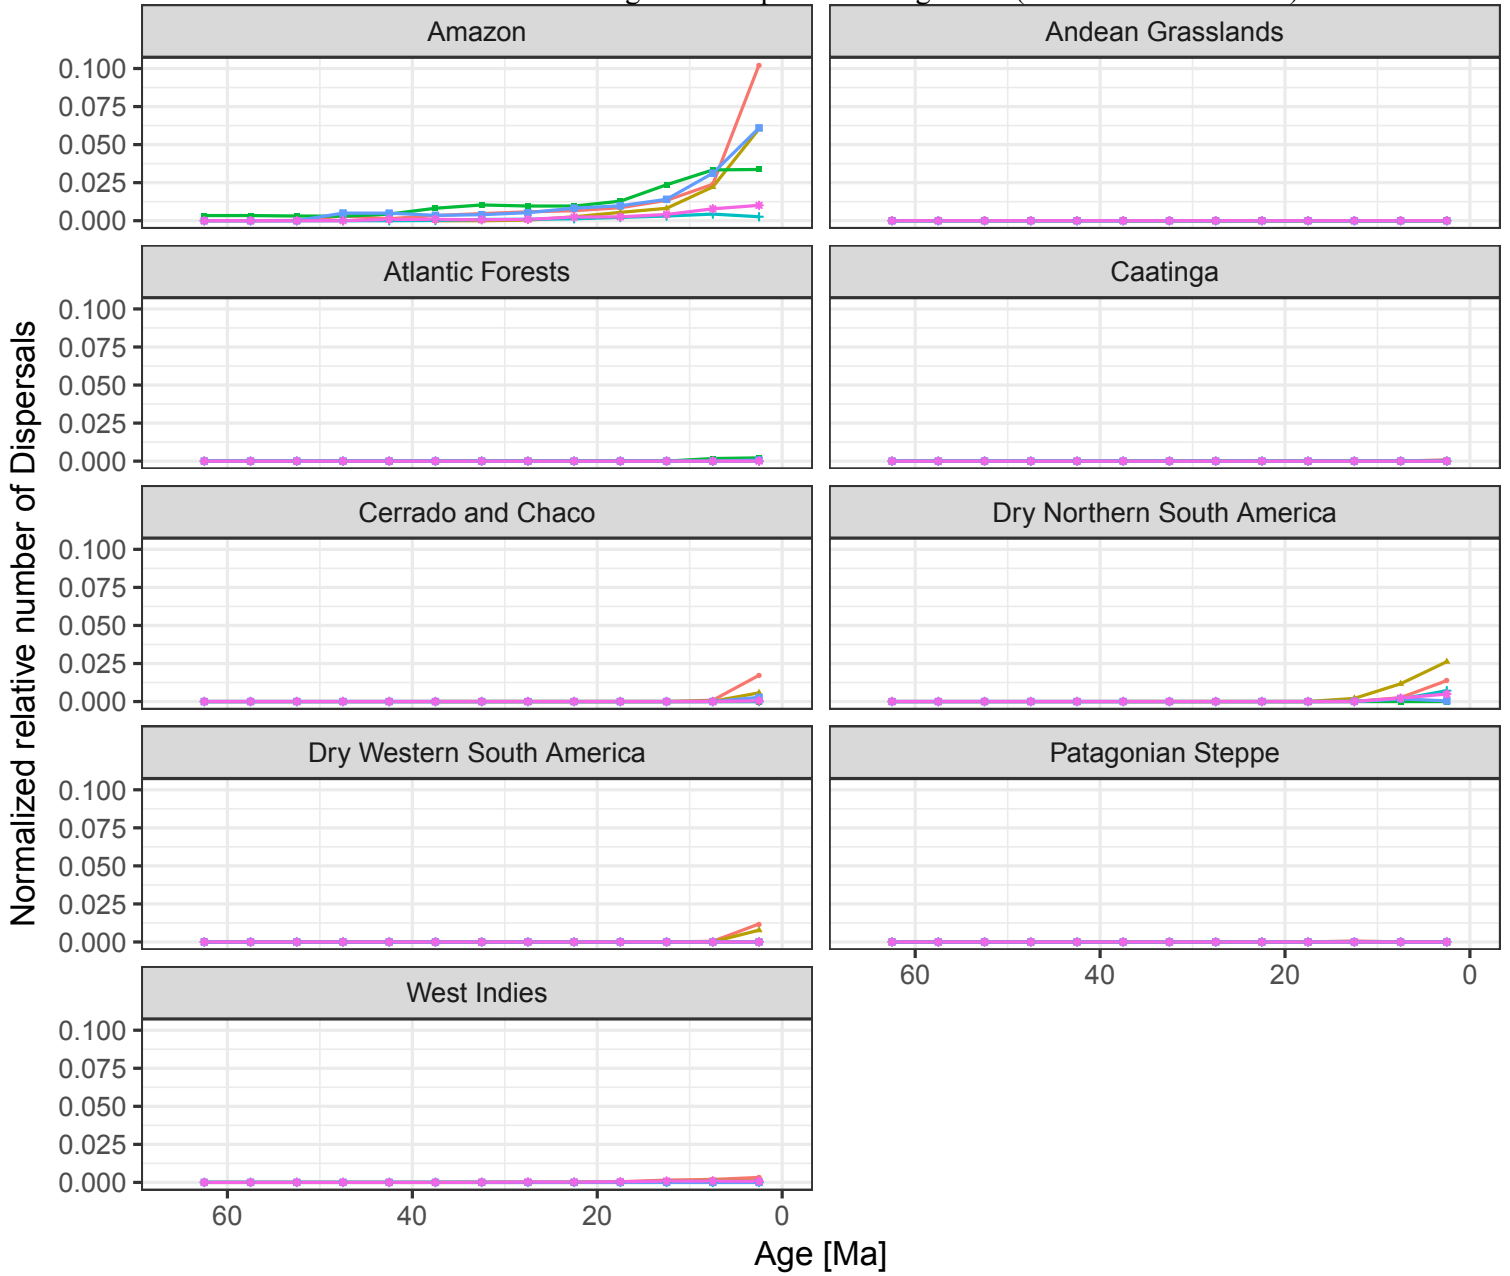

—●— Angiosperms —■— Ferns —▲— Mammals  
 —◆— Birds —×— Frogs —●— Squamates

# Andean Grasslands

Fig. S11: Dispersals through time (Time-stratified model)

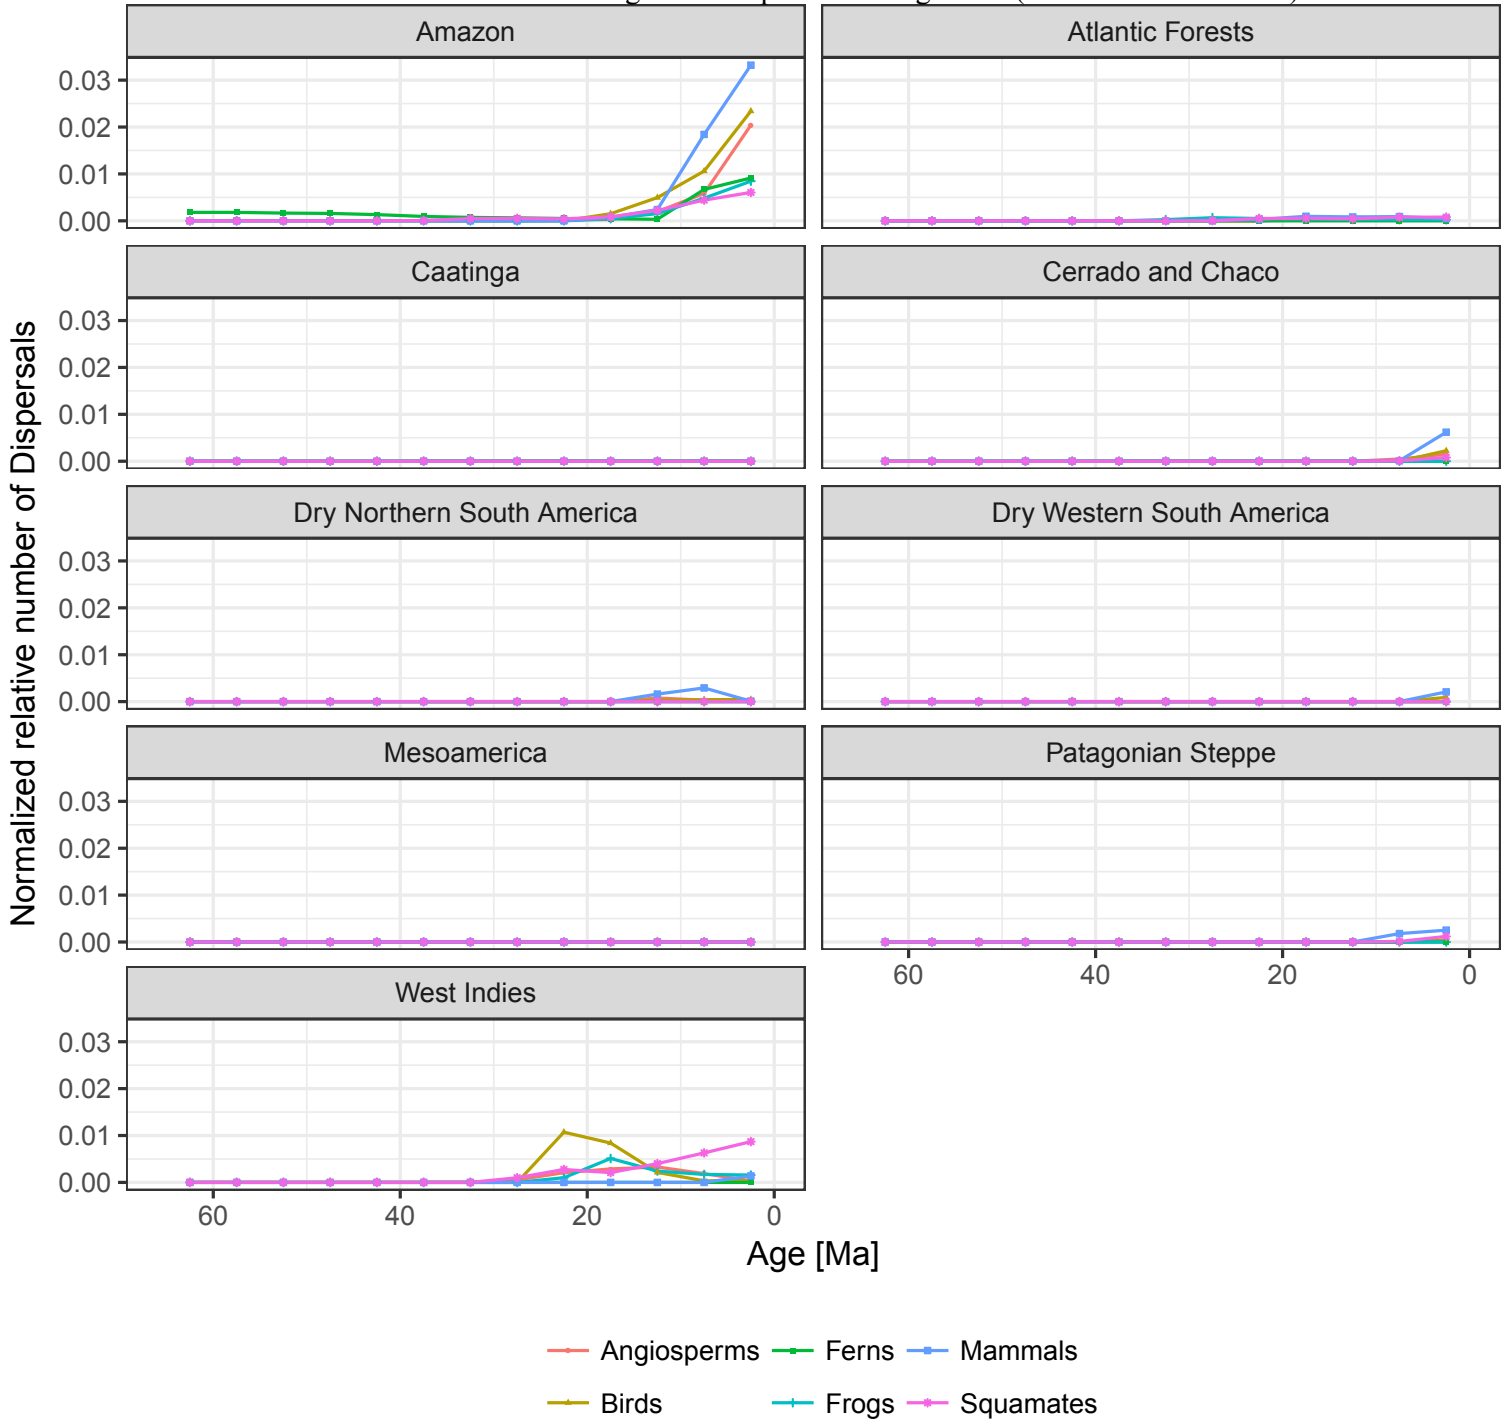

# Patagonian Steppe

Fig. S11: Dispersals through time (Time-stratified model)

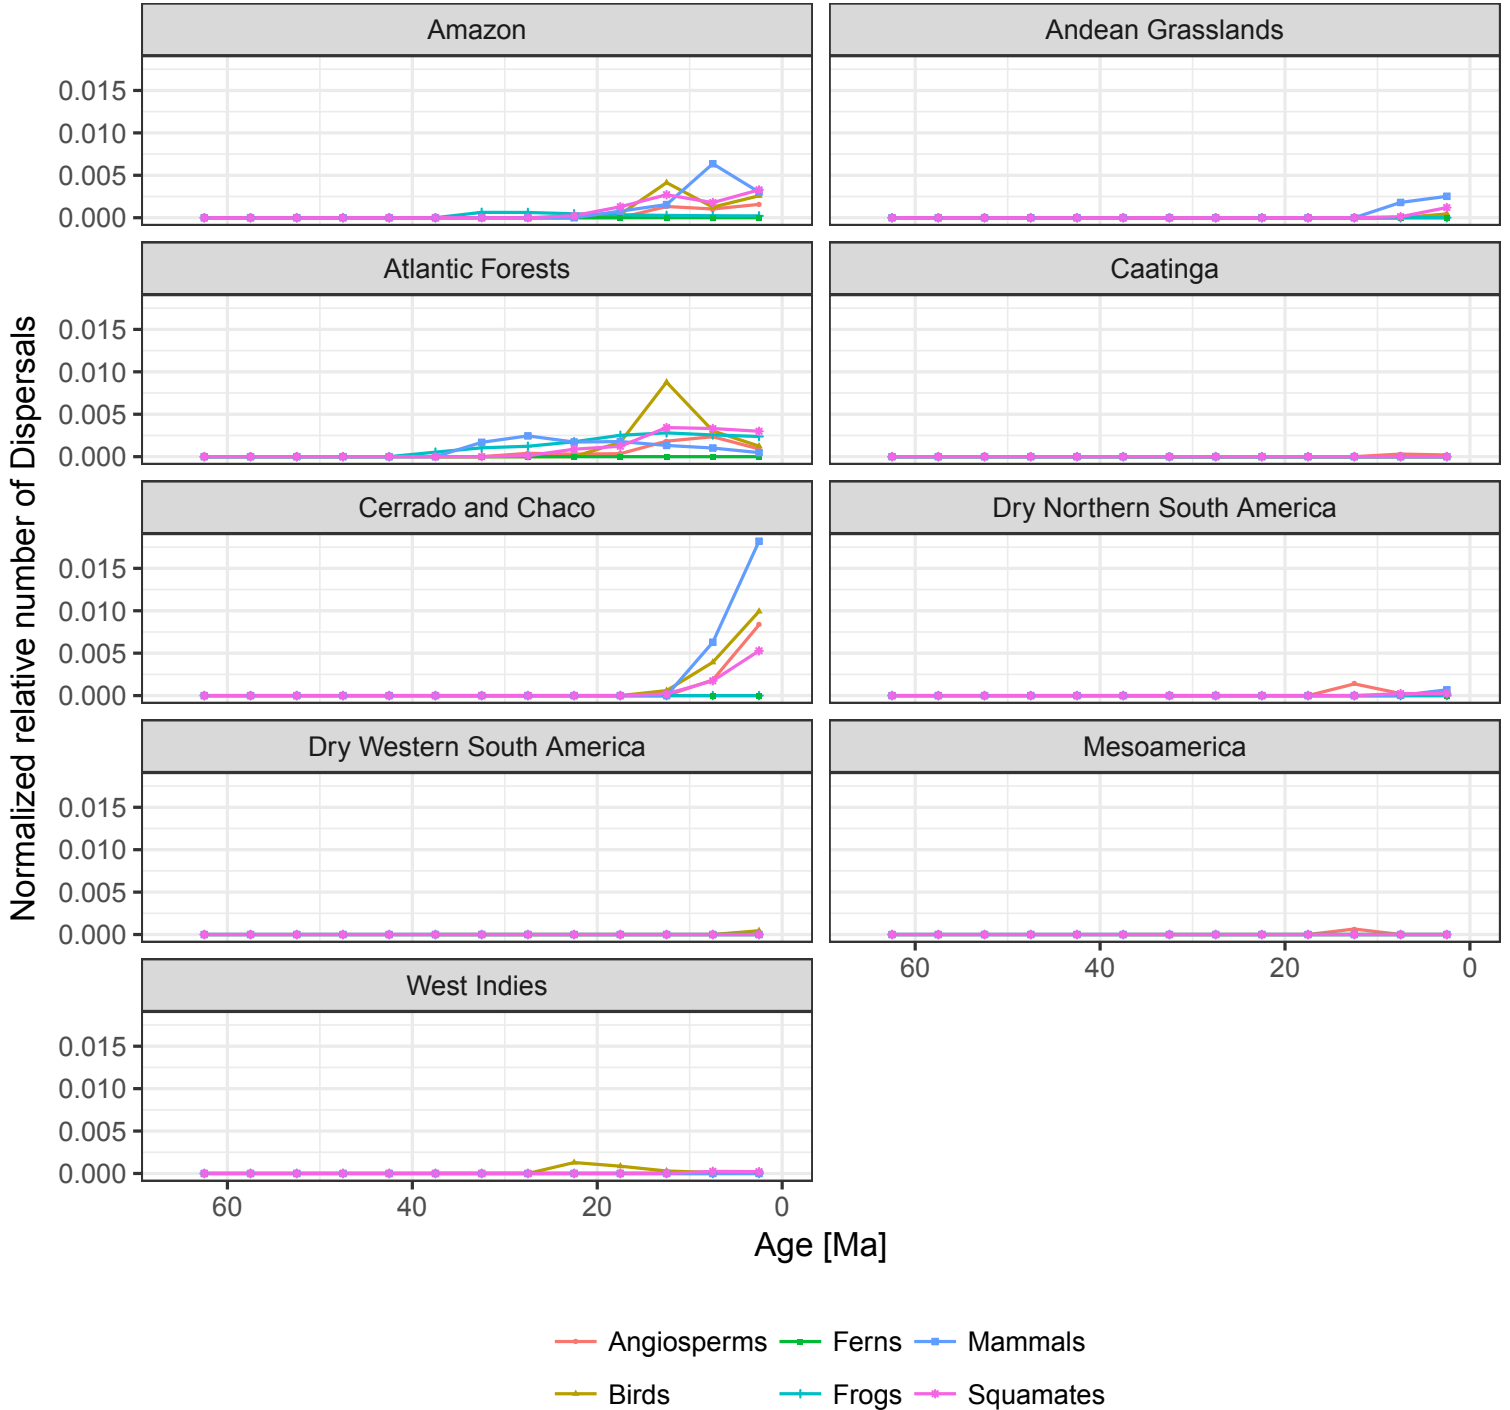

# Amazon

Fig. S12: Dispersals through time (Unconstrained model)

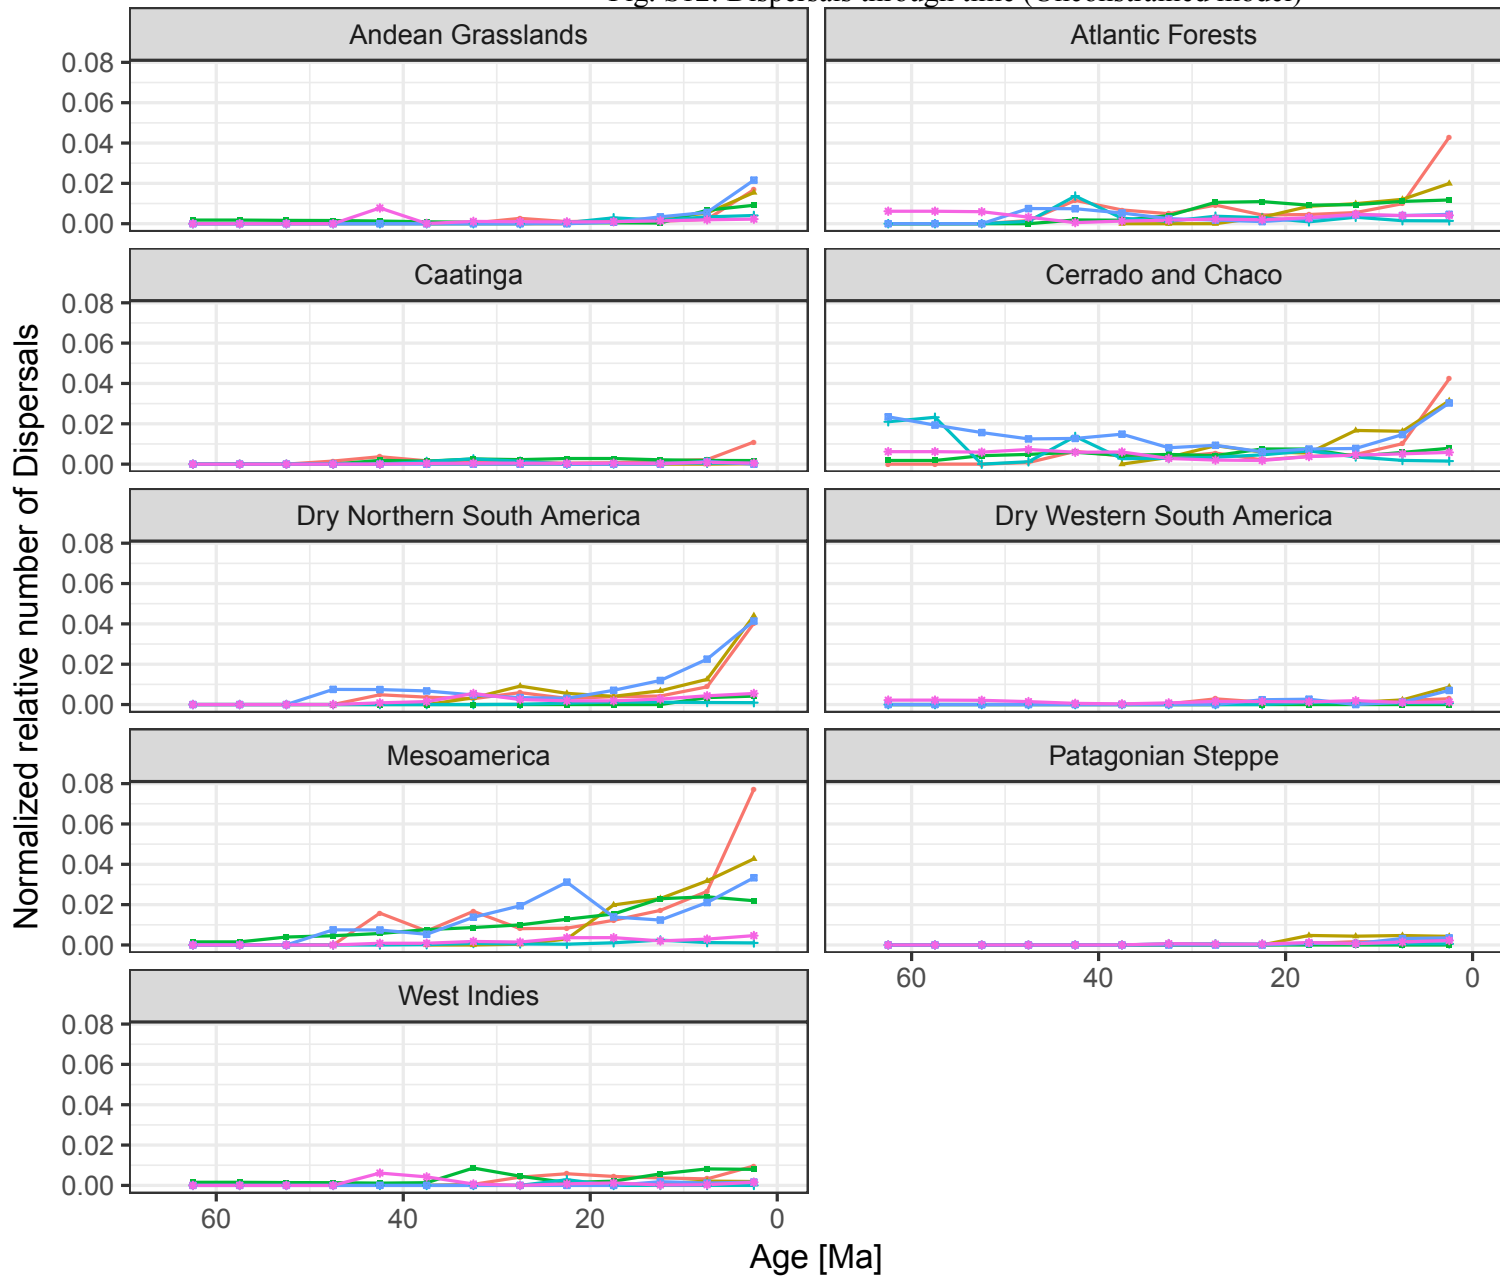

- Angiosperms
- Ferns
- ▲— Mammals
- ◆— Birds
- ×— Frogs
- \*— Squamates

# Atlantic Forests

Fig. S12: Dispersals through time (Unconstrained model)

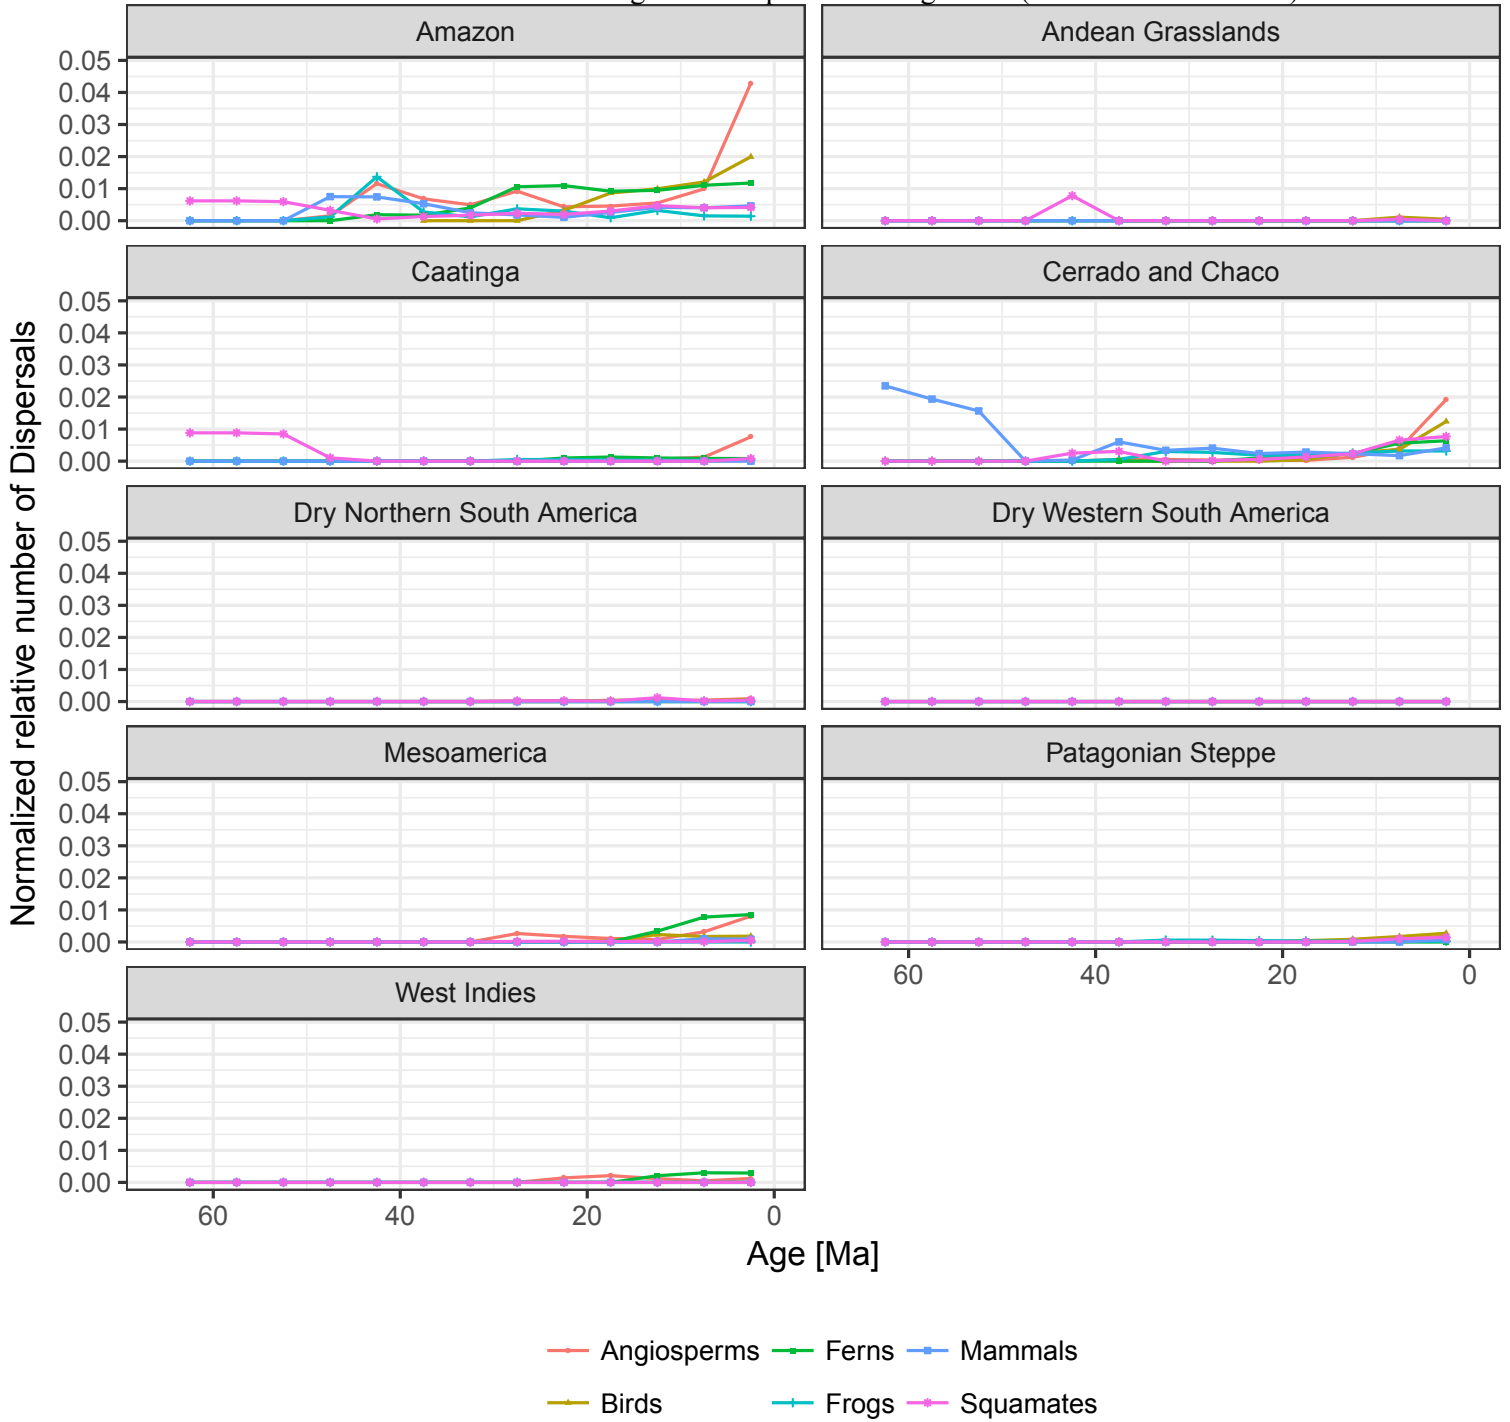

# Caatinga

Fig. S12: Dispersals through time (Unconstrained model)

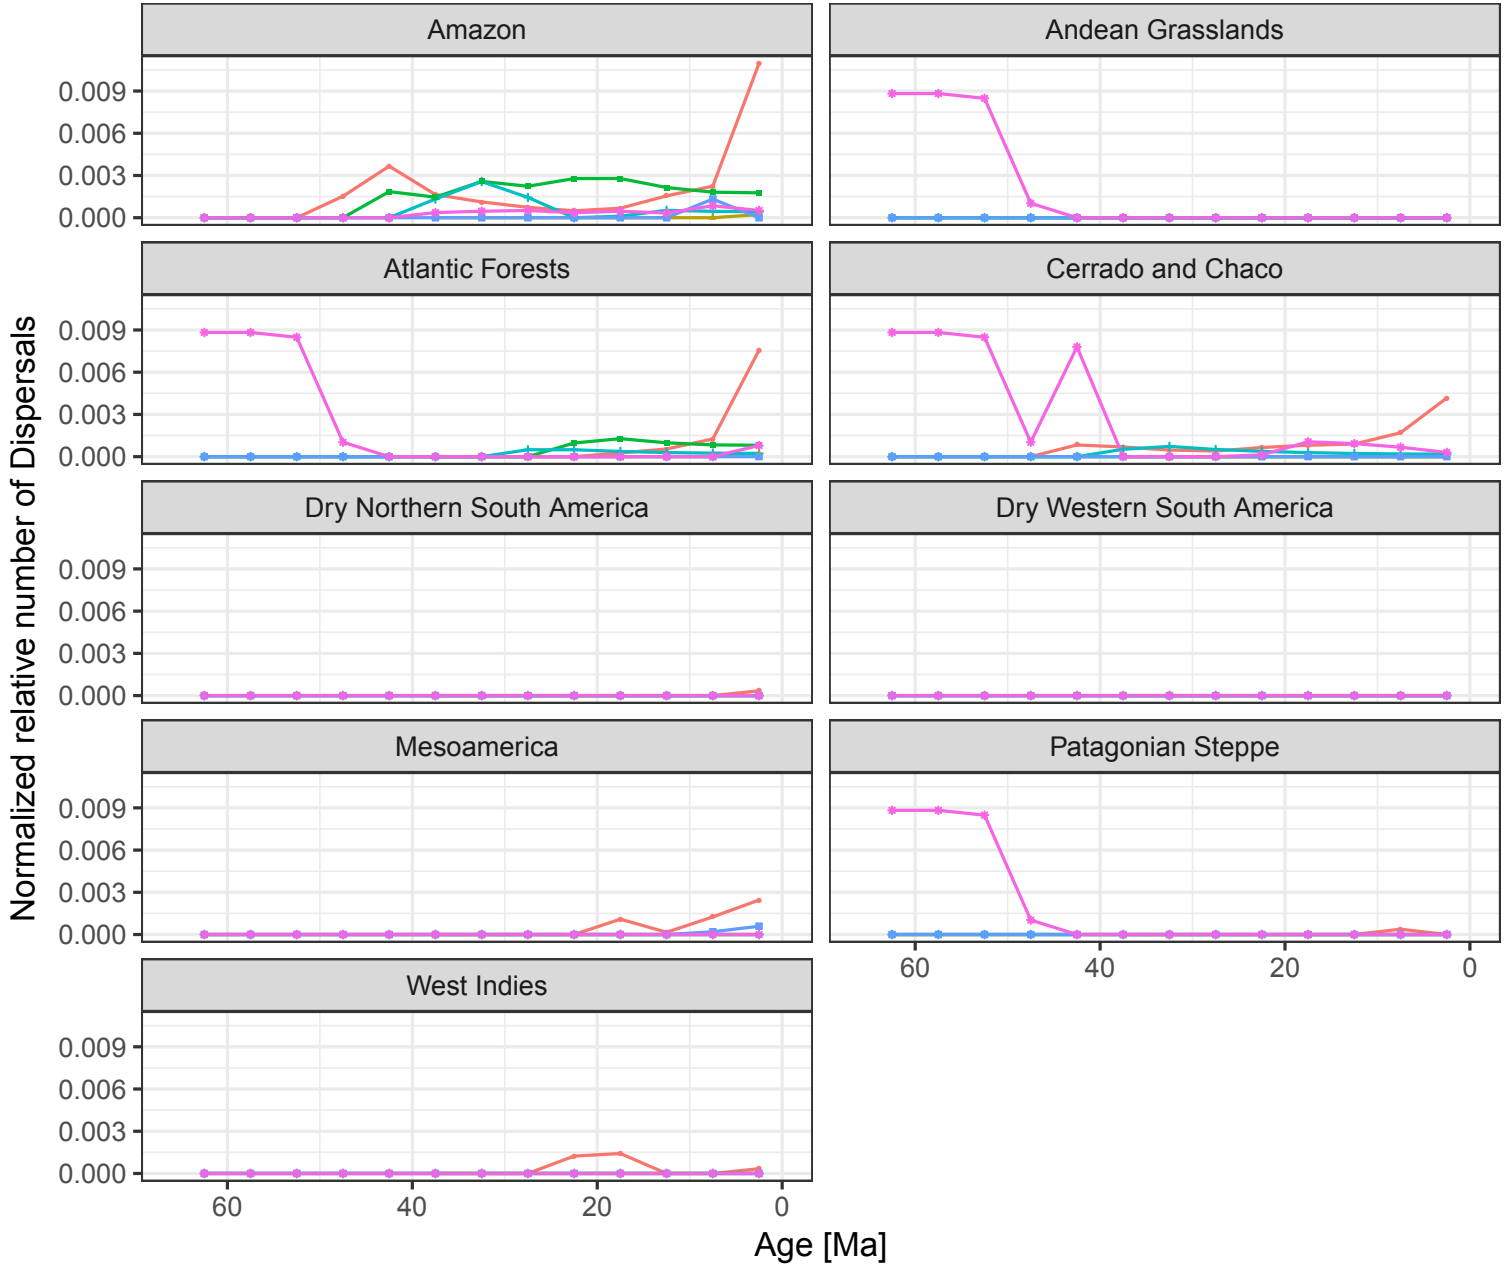



West Indies

Fig. S12: Dispersals through time (Unconstrained model)

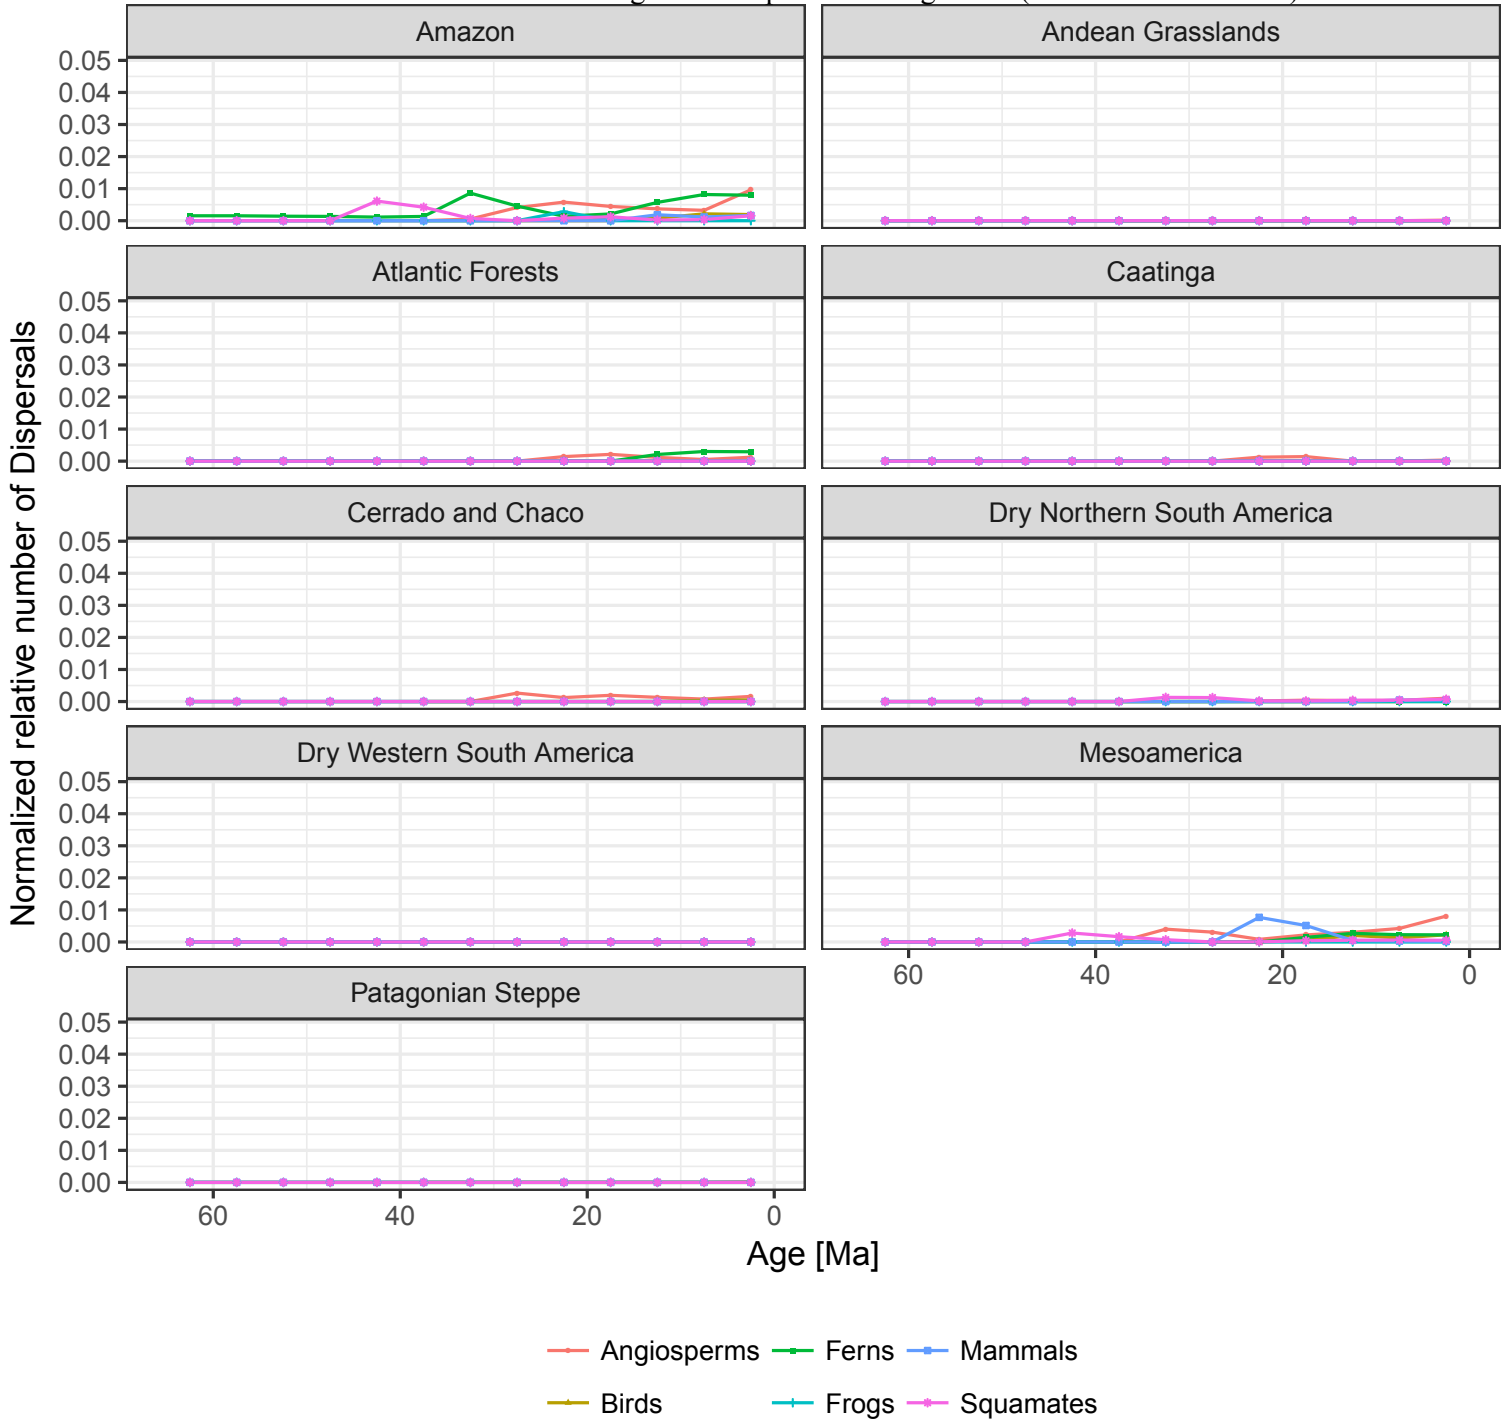

Cerrado and Chaco

Fig. S12: Dispersals through time (Unconstrained model)

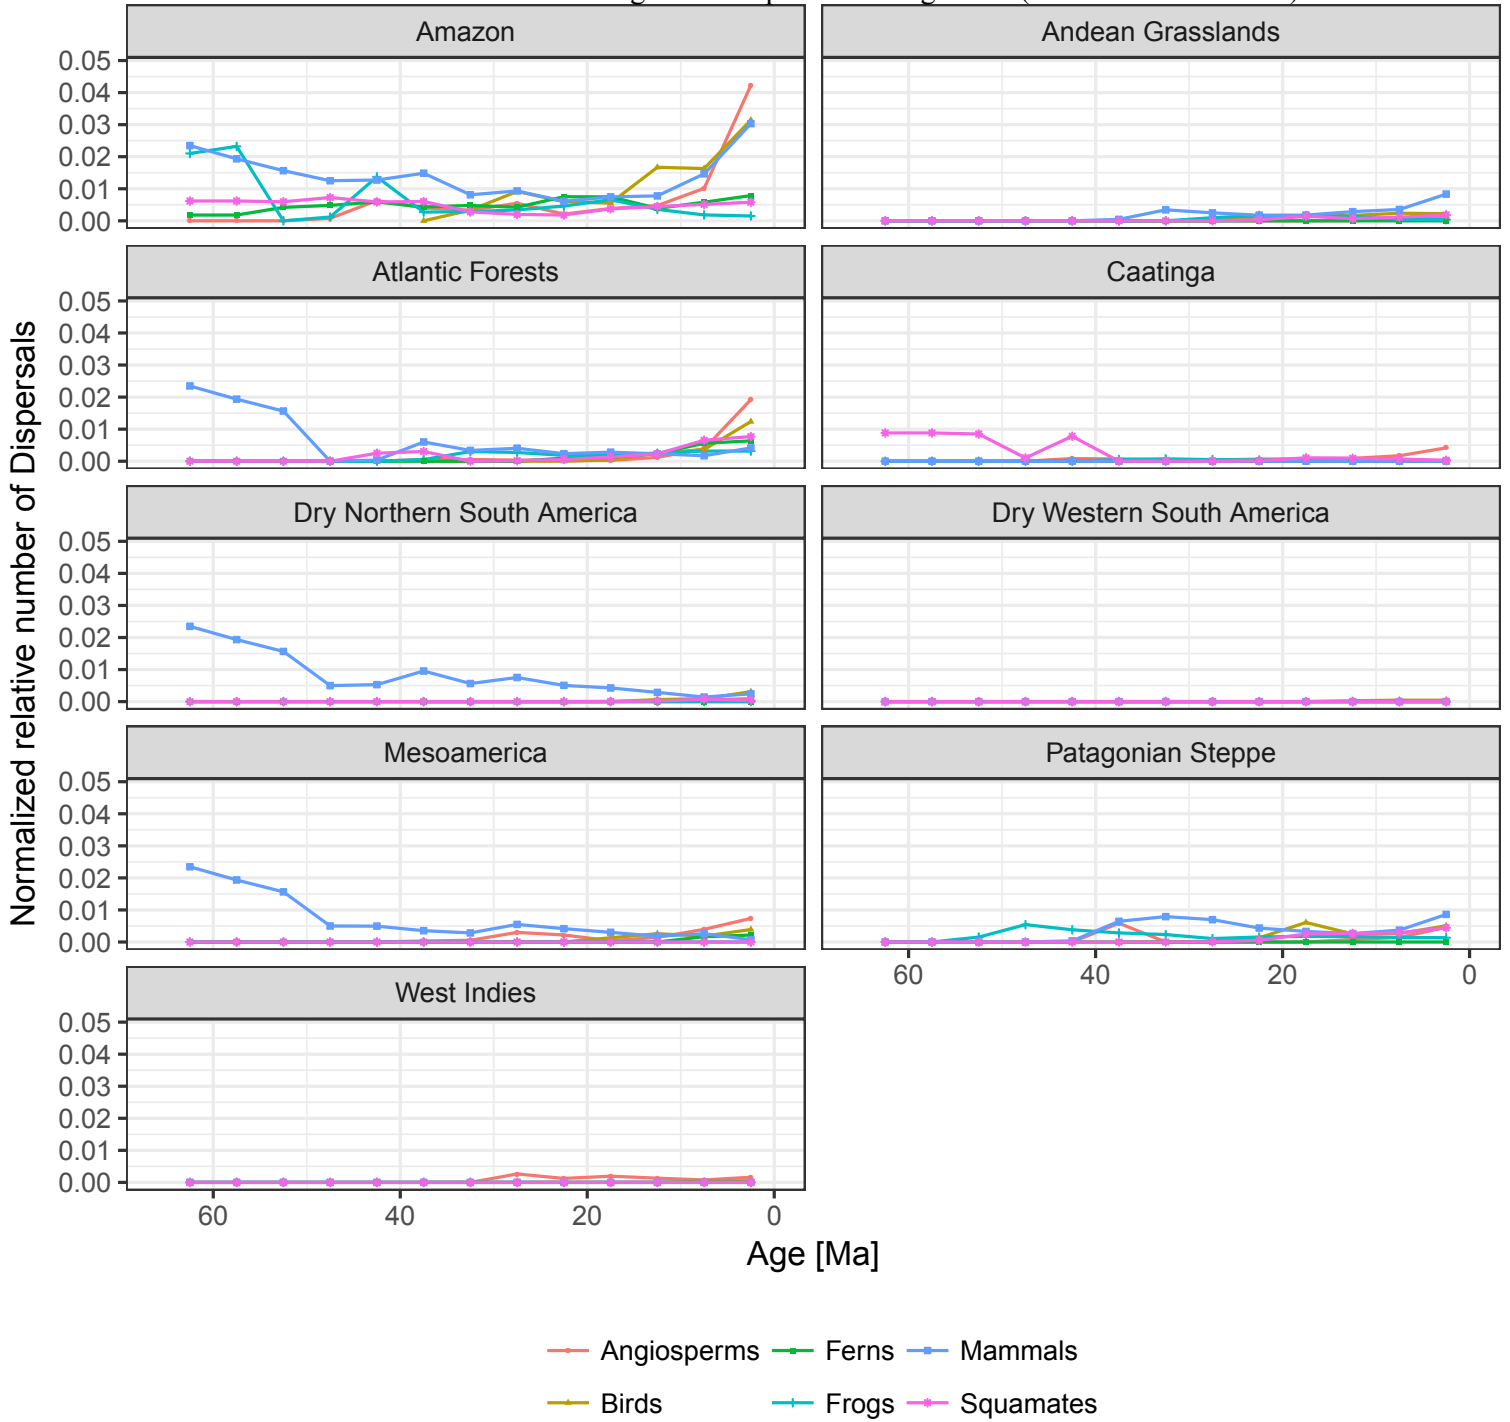

# Dry Northern South America

Fig. S12: Dispersals through time (Unconstrained model)

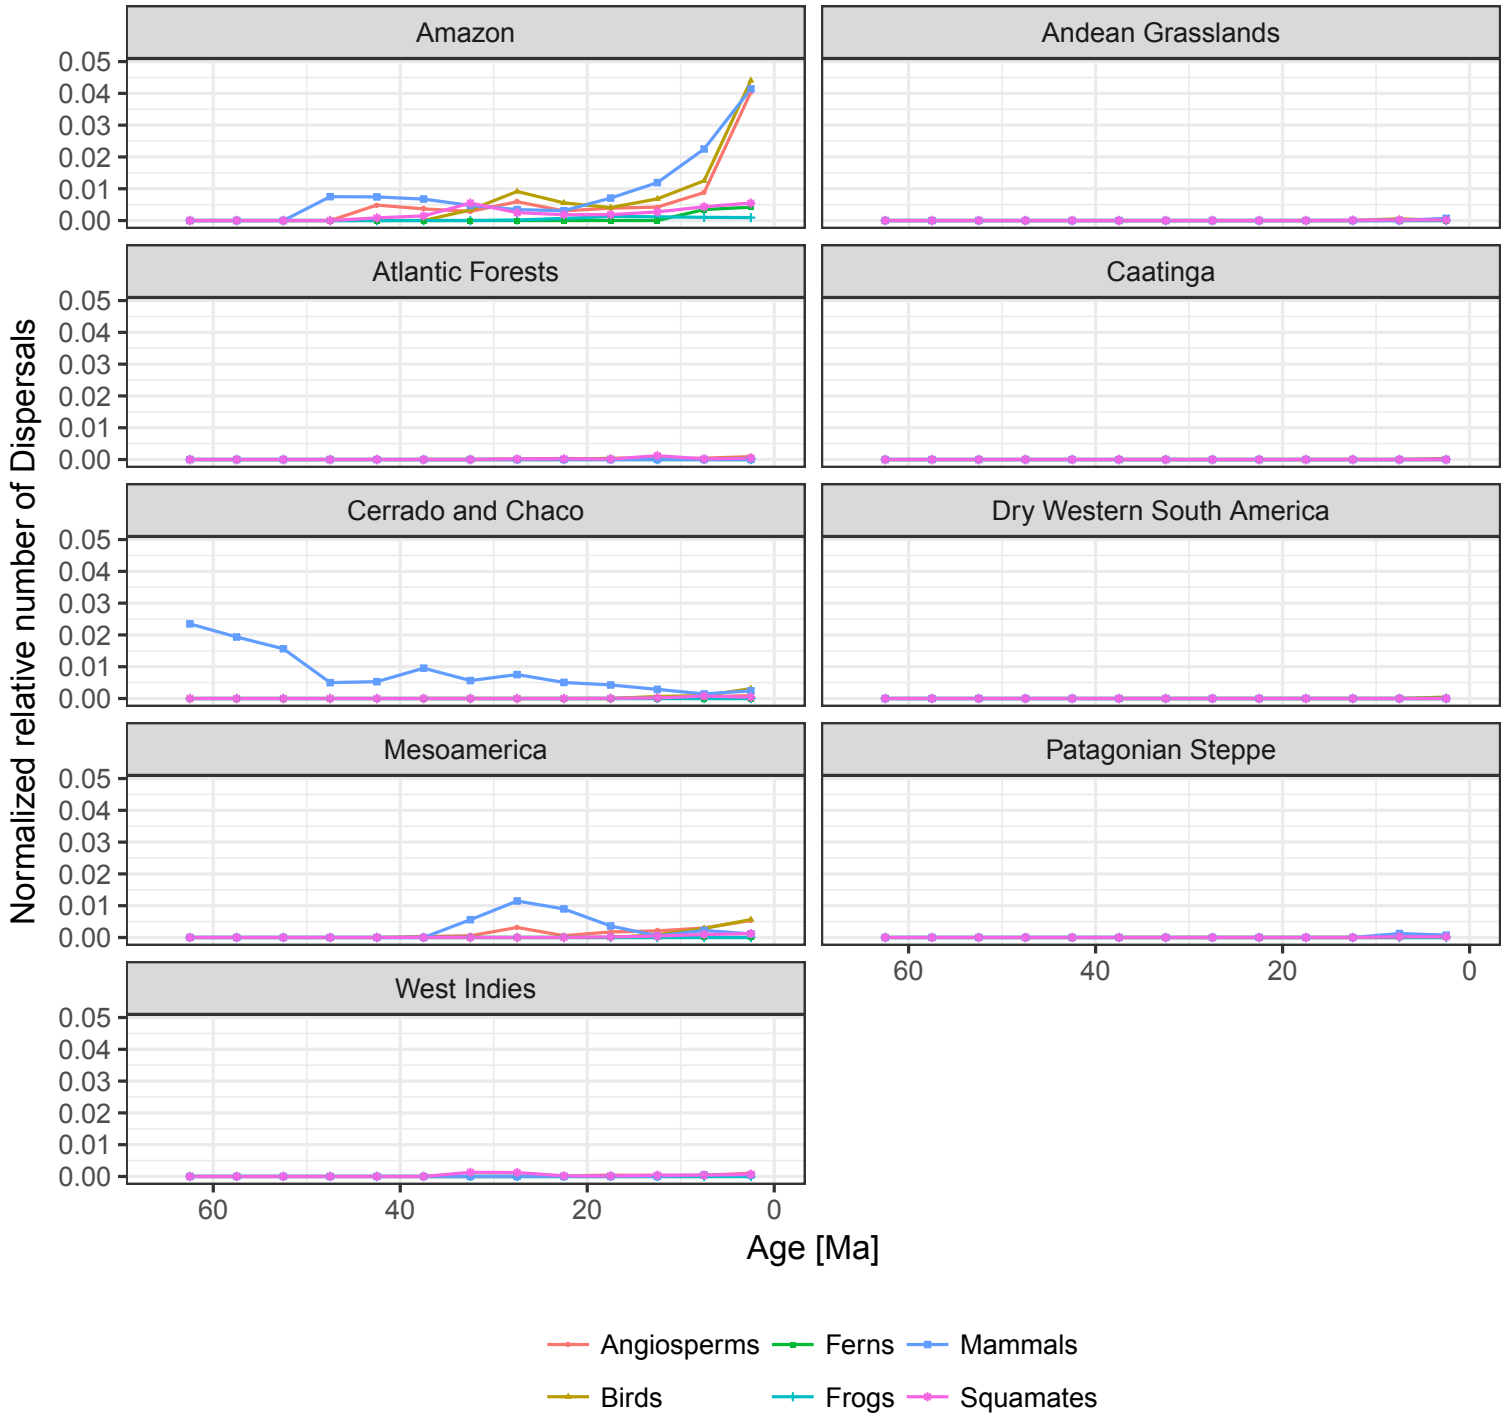

# Dry Western South America

Fig. S12: Dispersals through time (Unconstrained model)

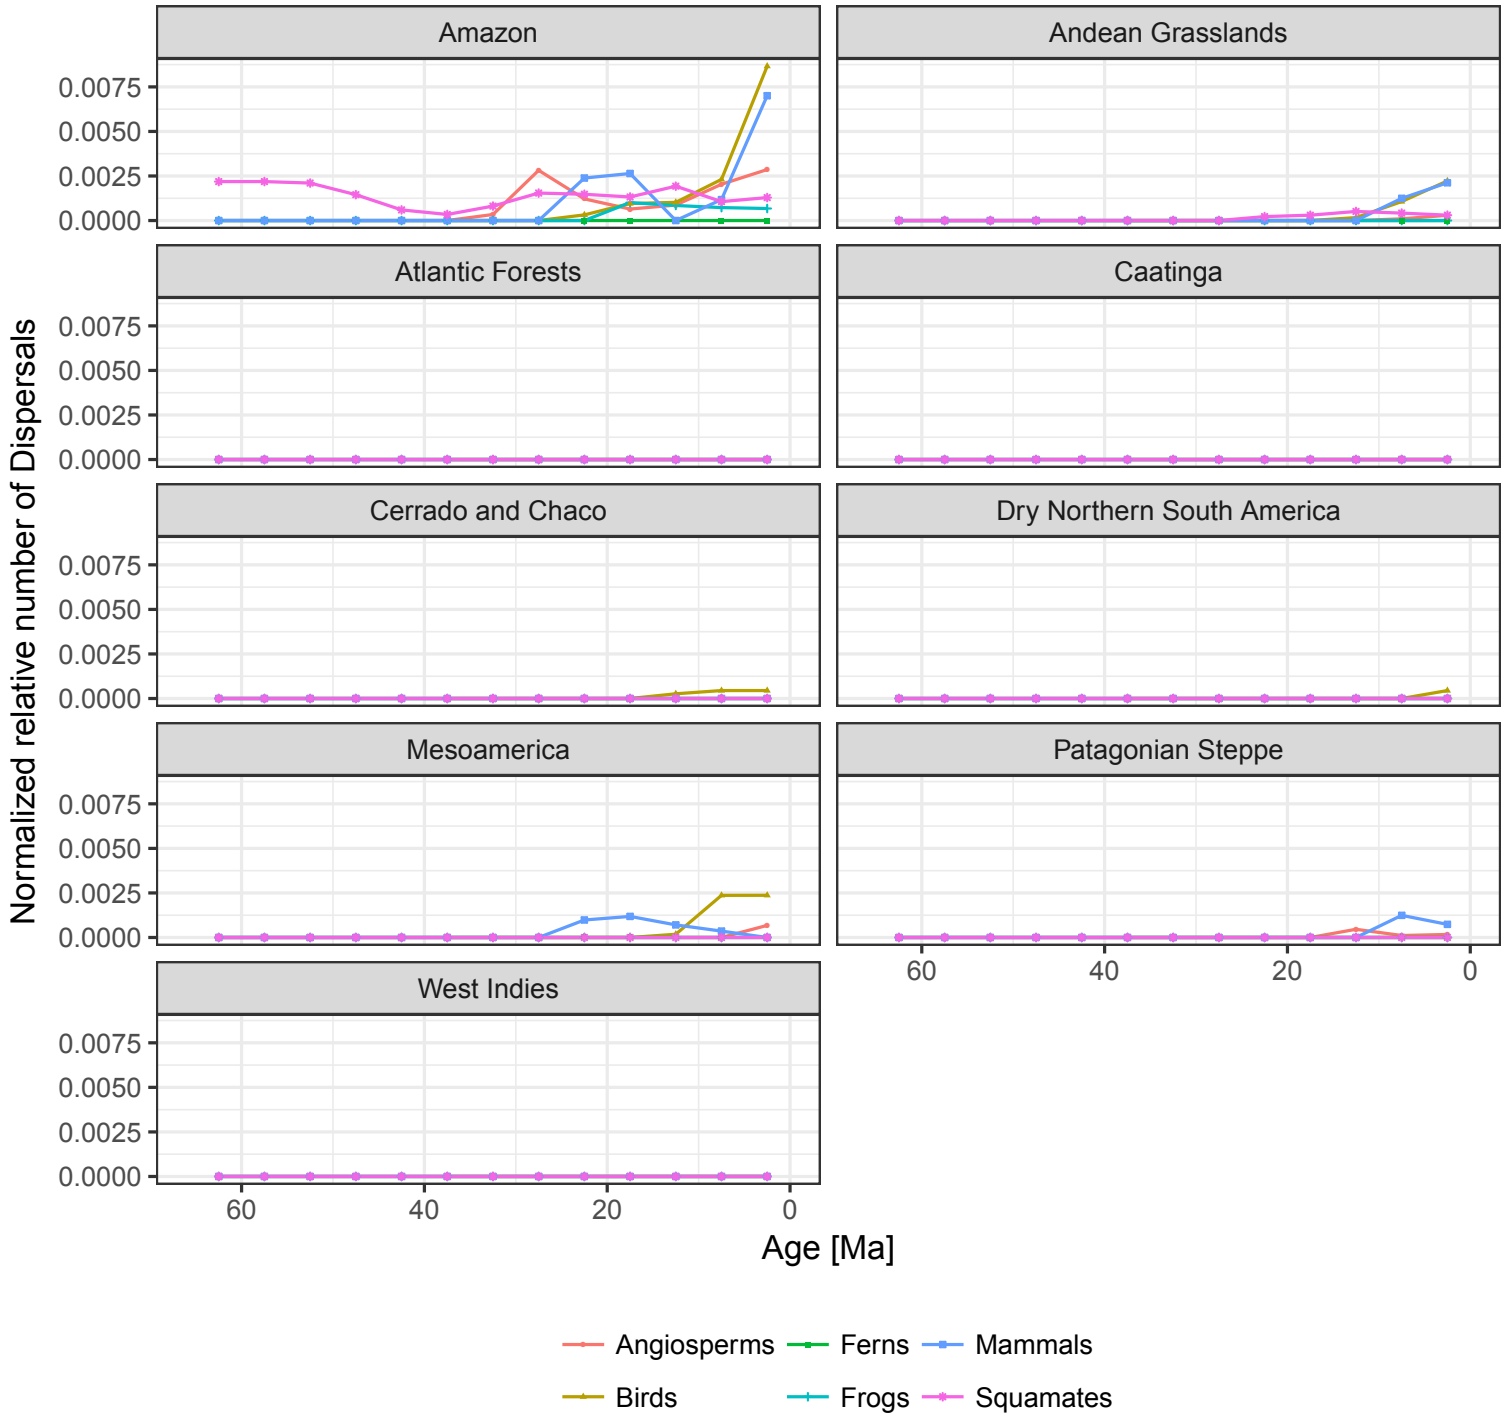

Mesoamerica

Fig. S12: Dispersals through time (Unconstrained model)

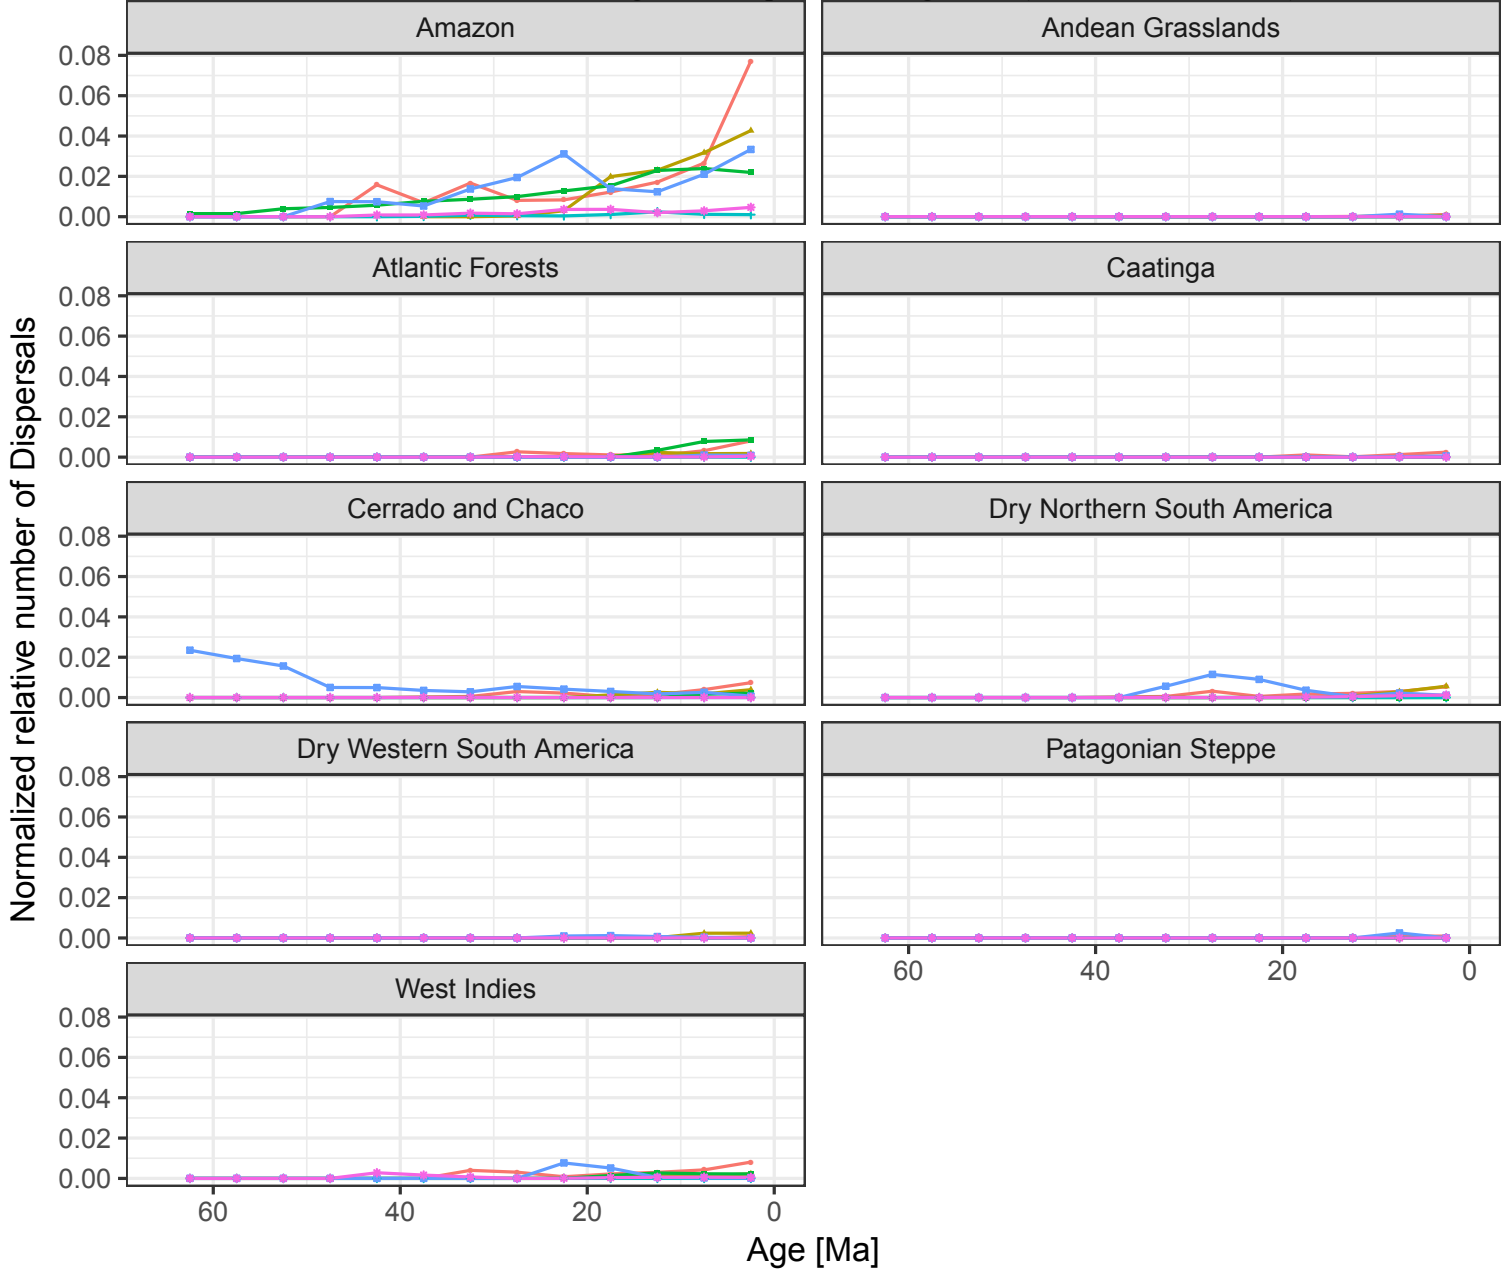

# Andean Grasslands

Fig. S12: Dispersals through time (Unconstrained model)

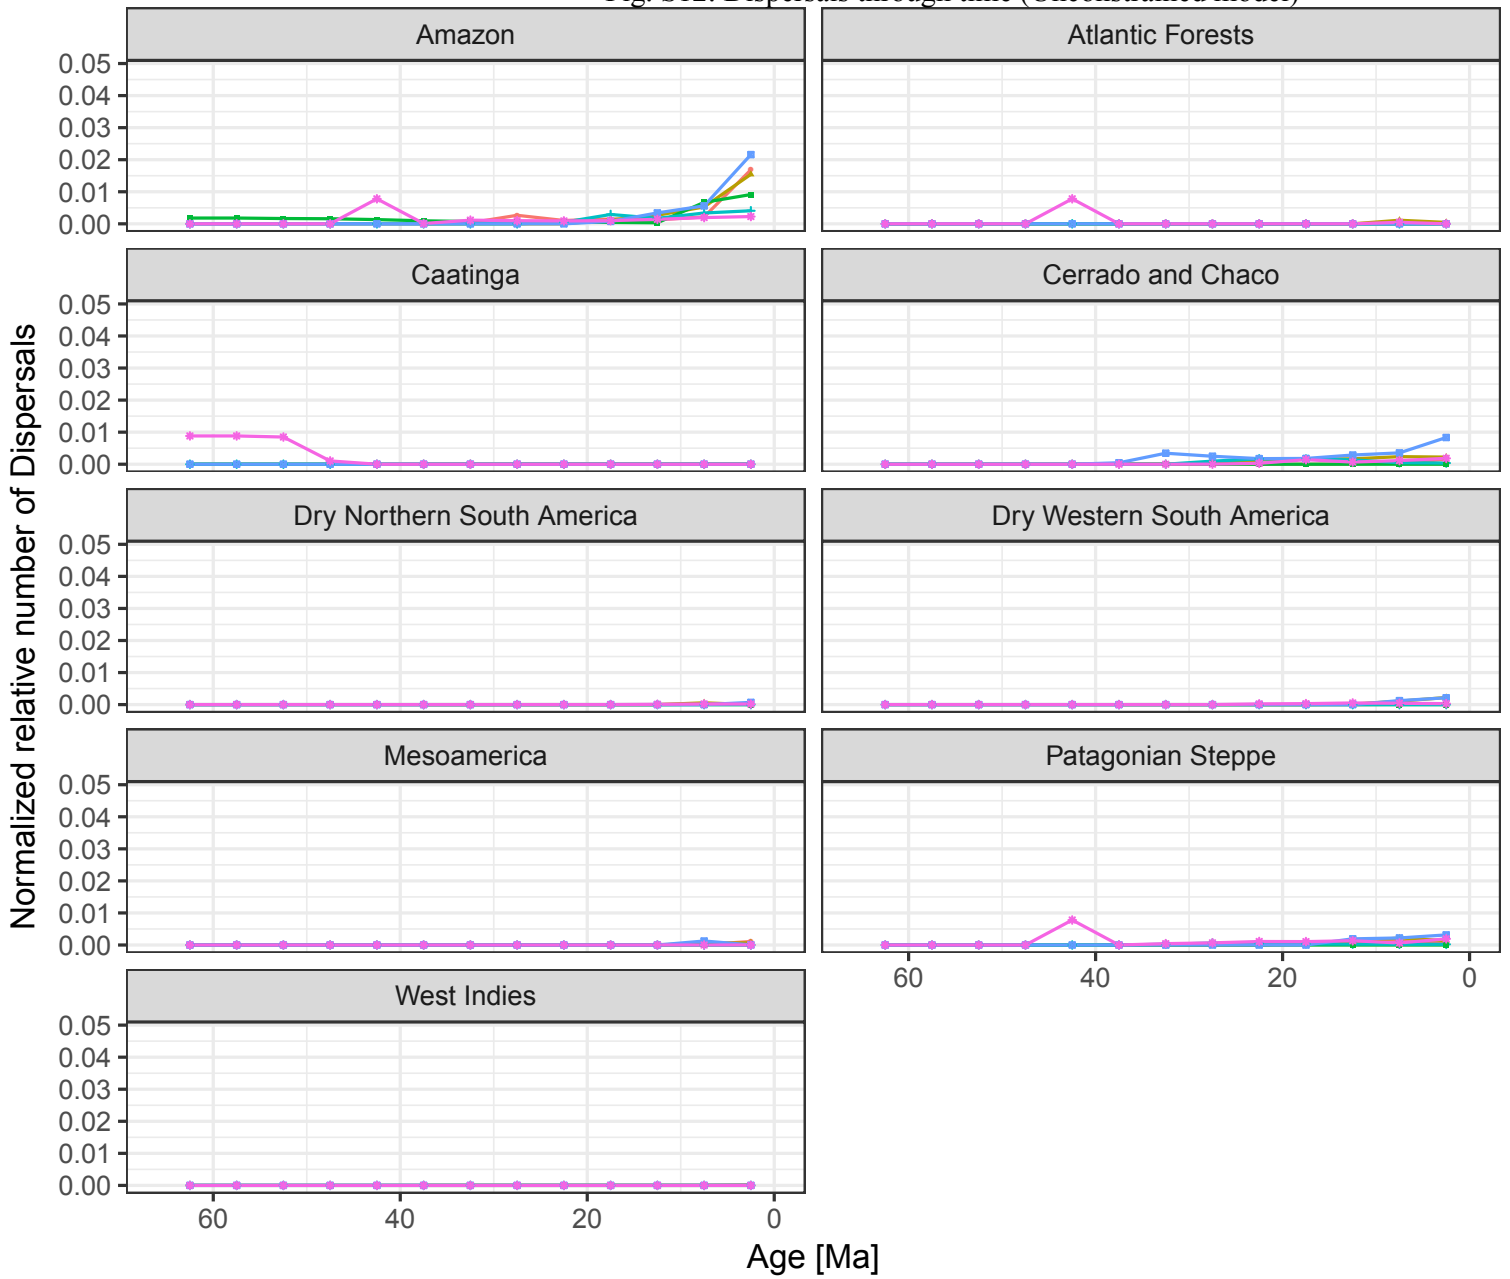

- Angiosperms
- Ferns
- Mammals
- Birds
- Frogs
- Squamates

Patagonian Steppe

Fig. S12: Dispersals through time (Unconstrained model)

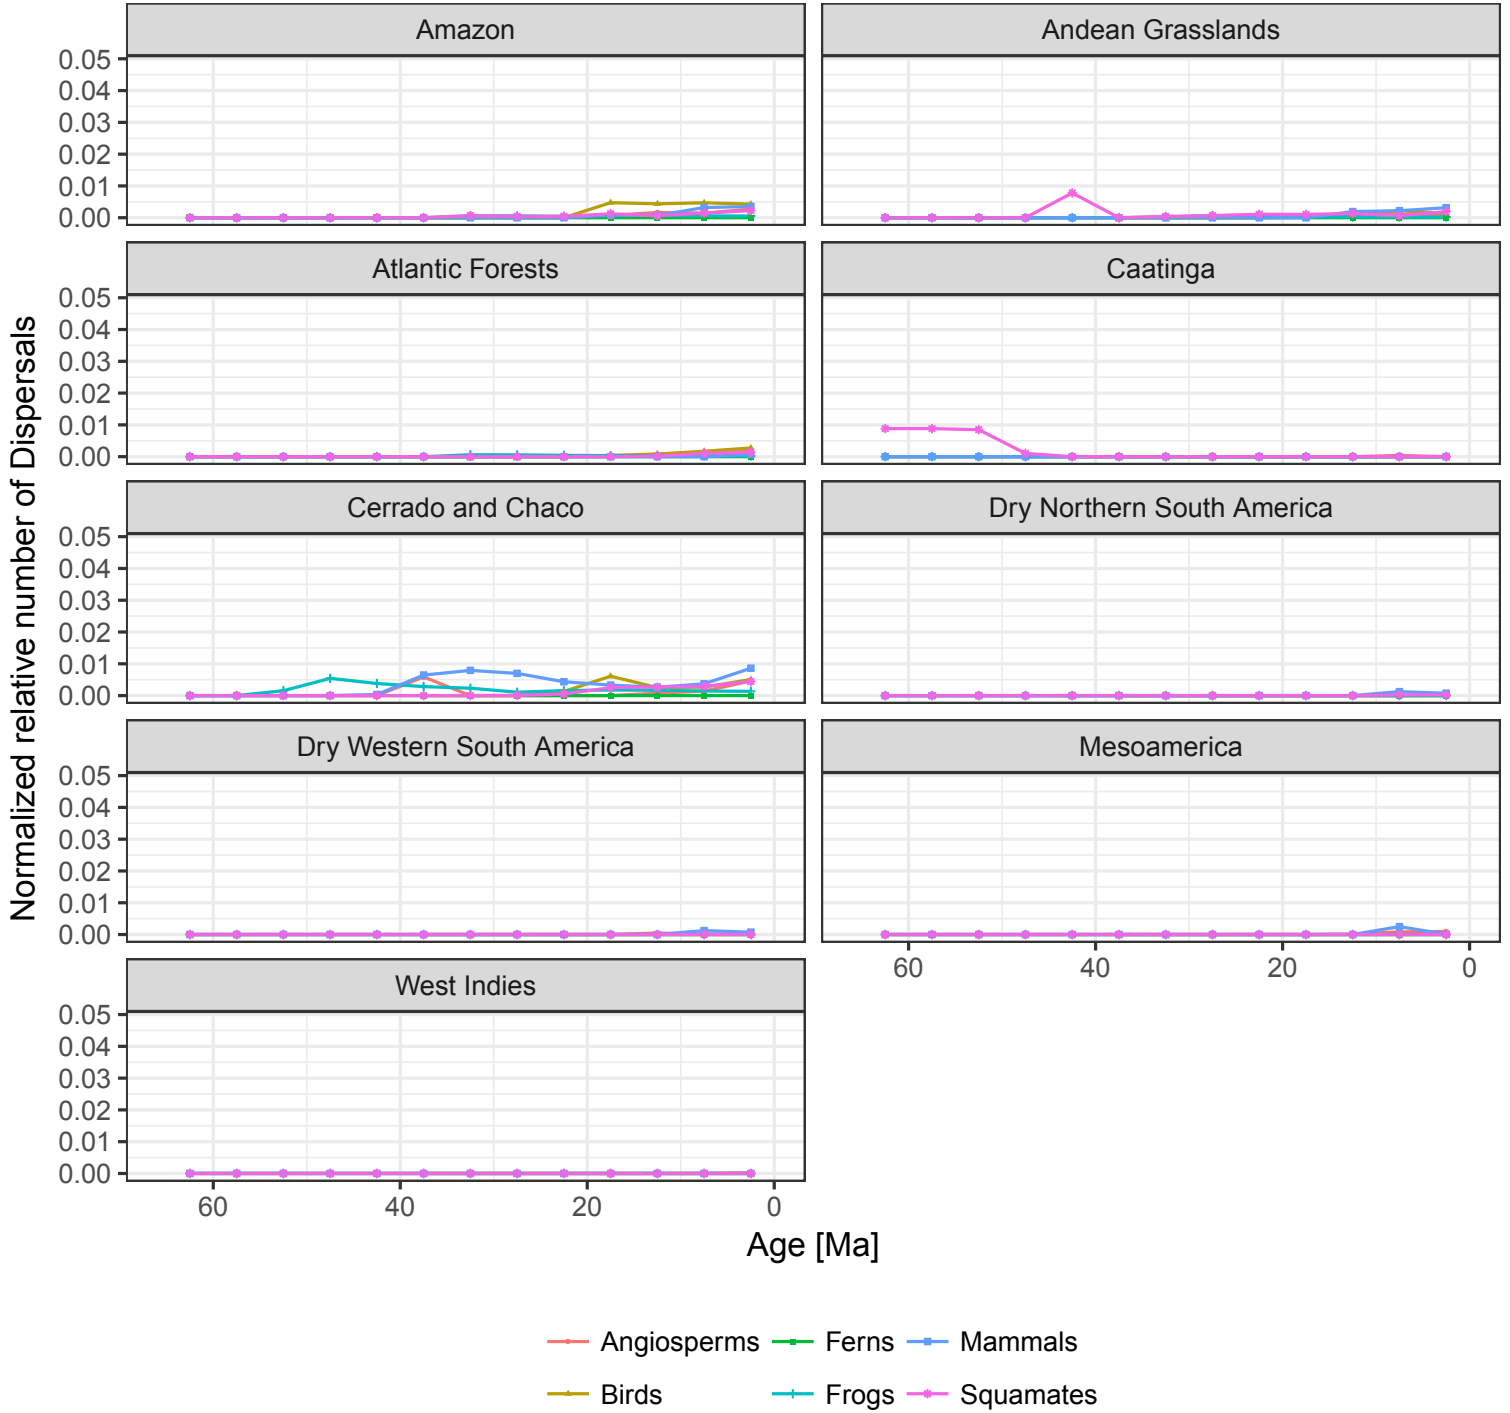

Fig. S13: Dispersal events (immigration + emigration) for each clade and region.

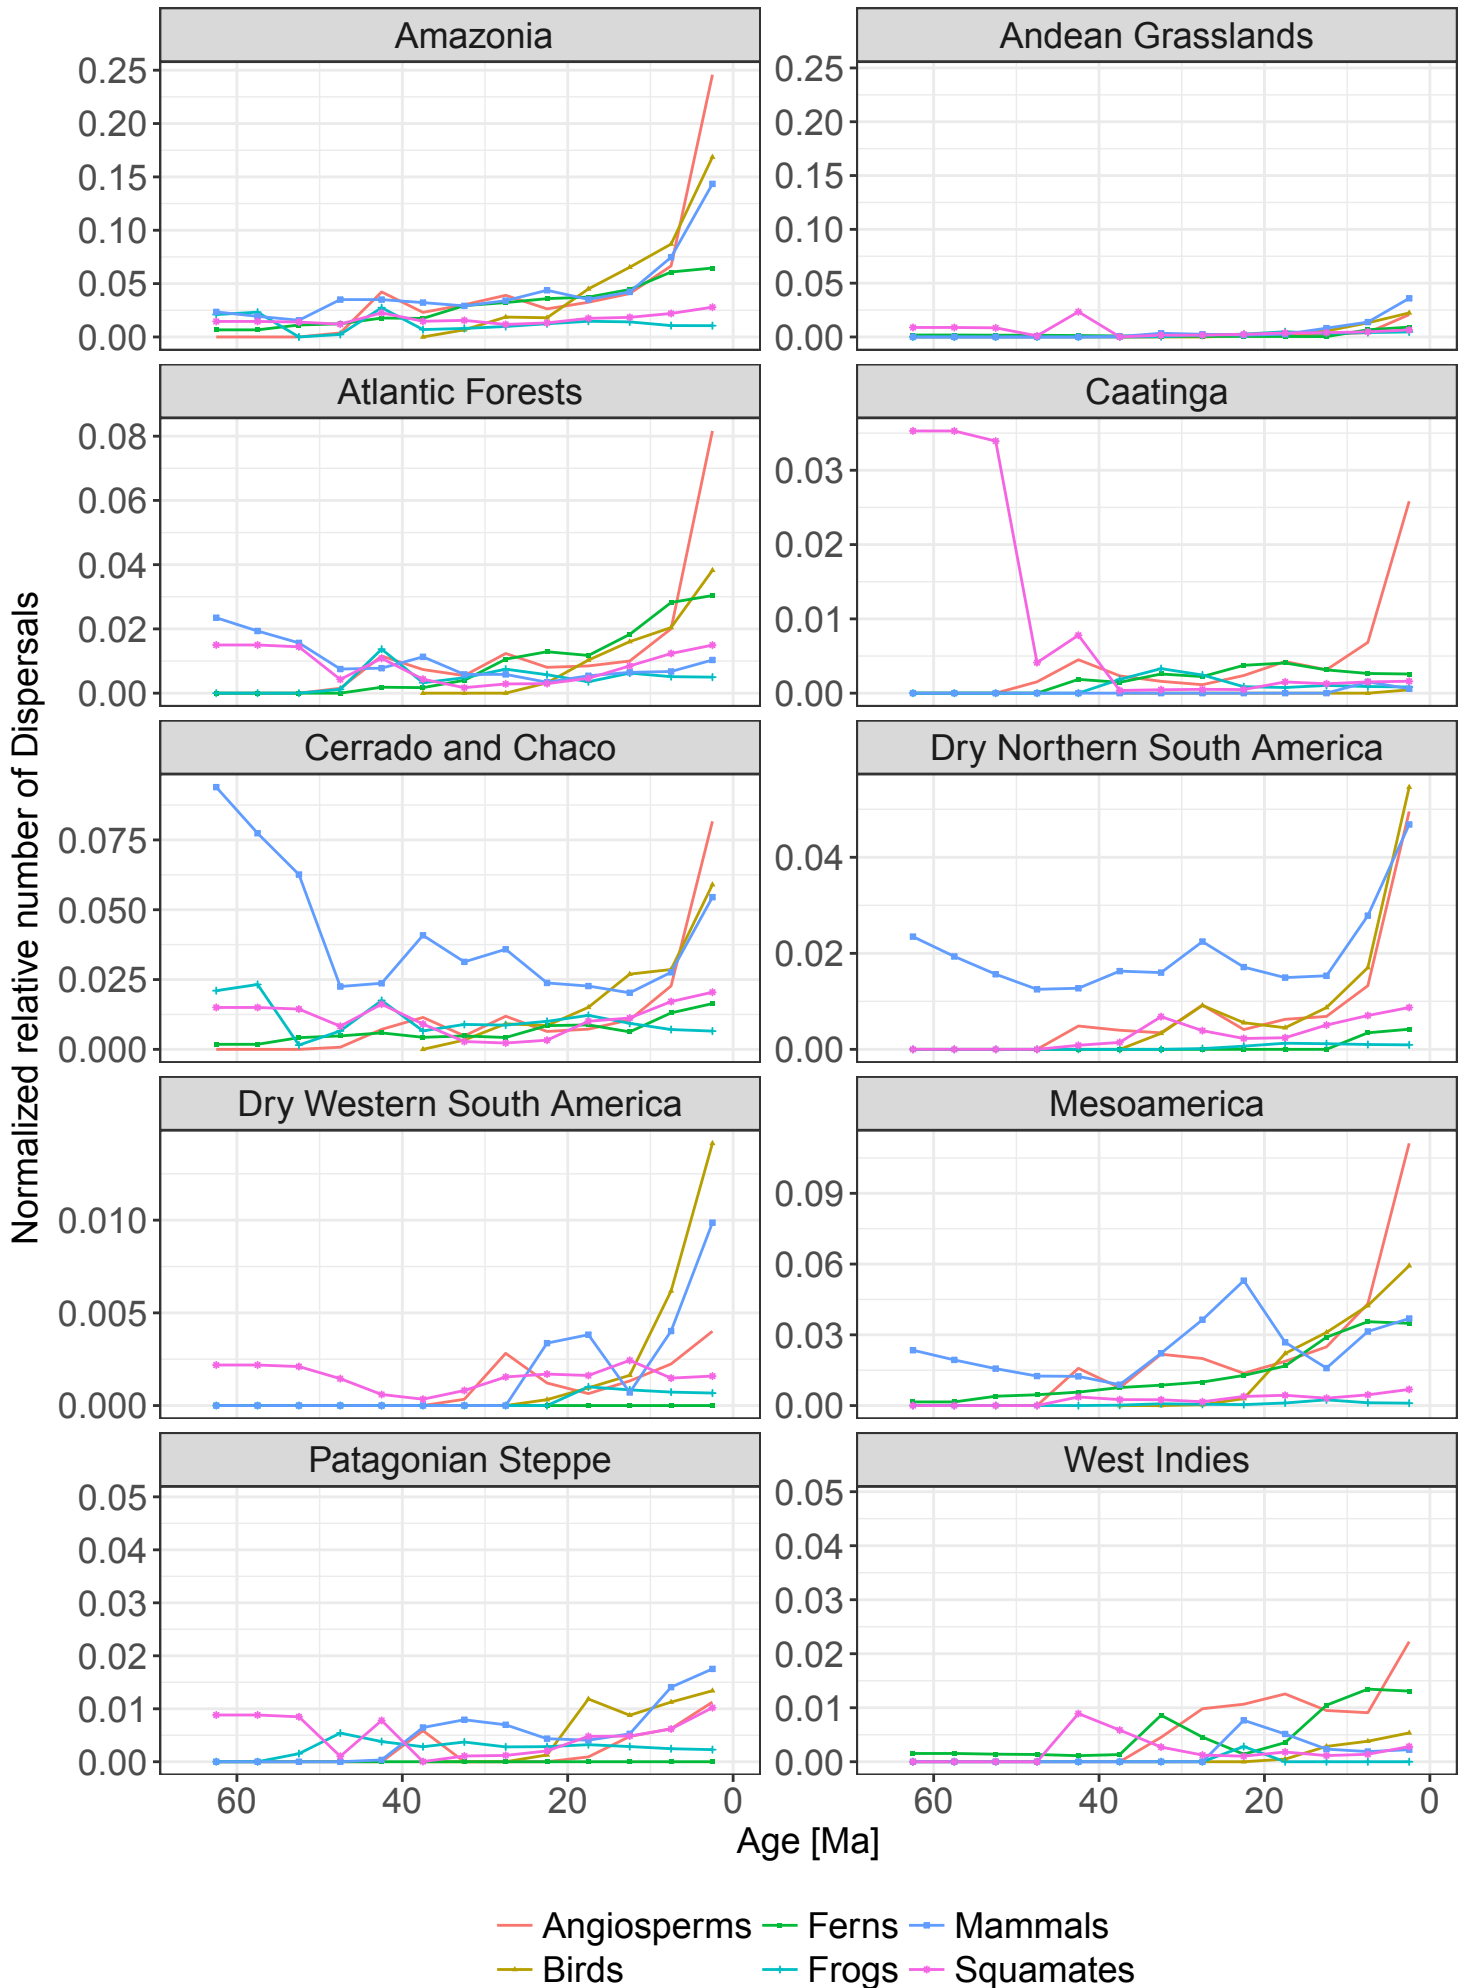



Emigrations from all study areas split by taxon

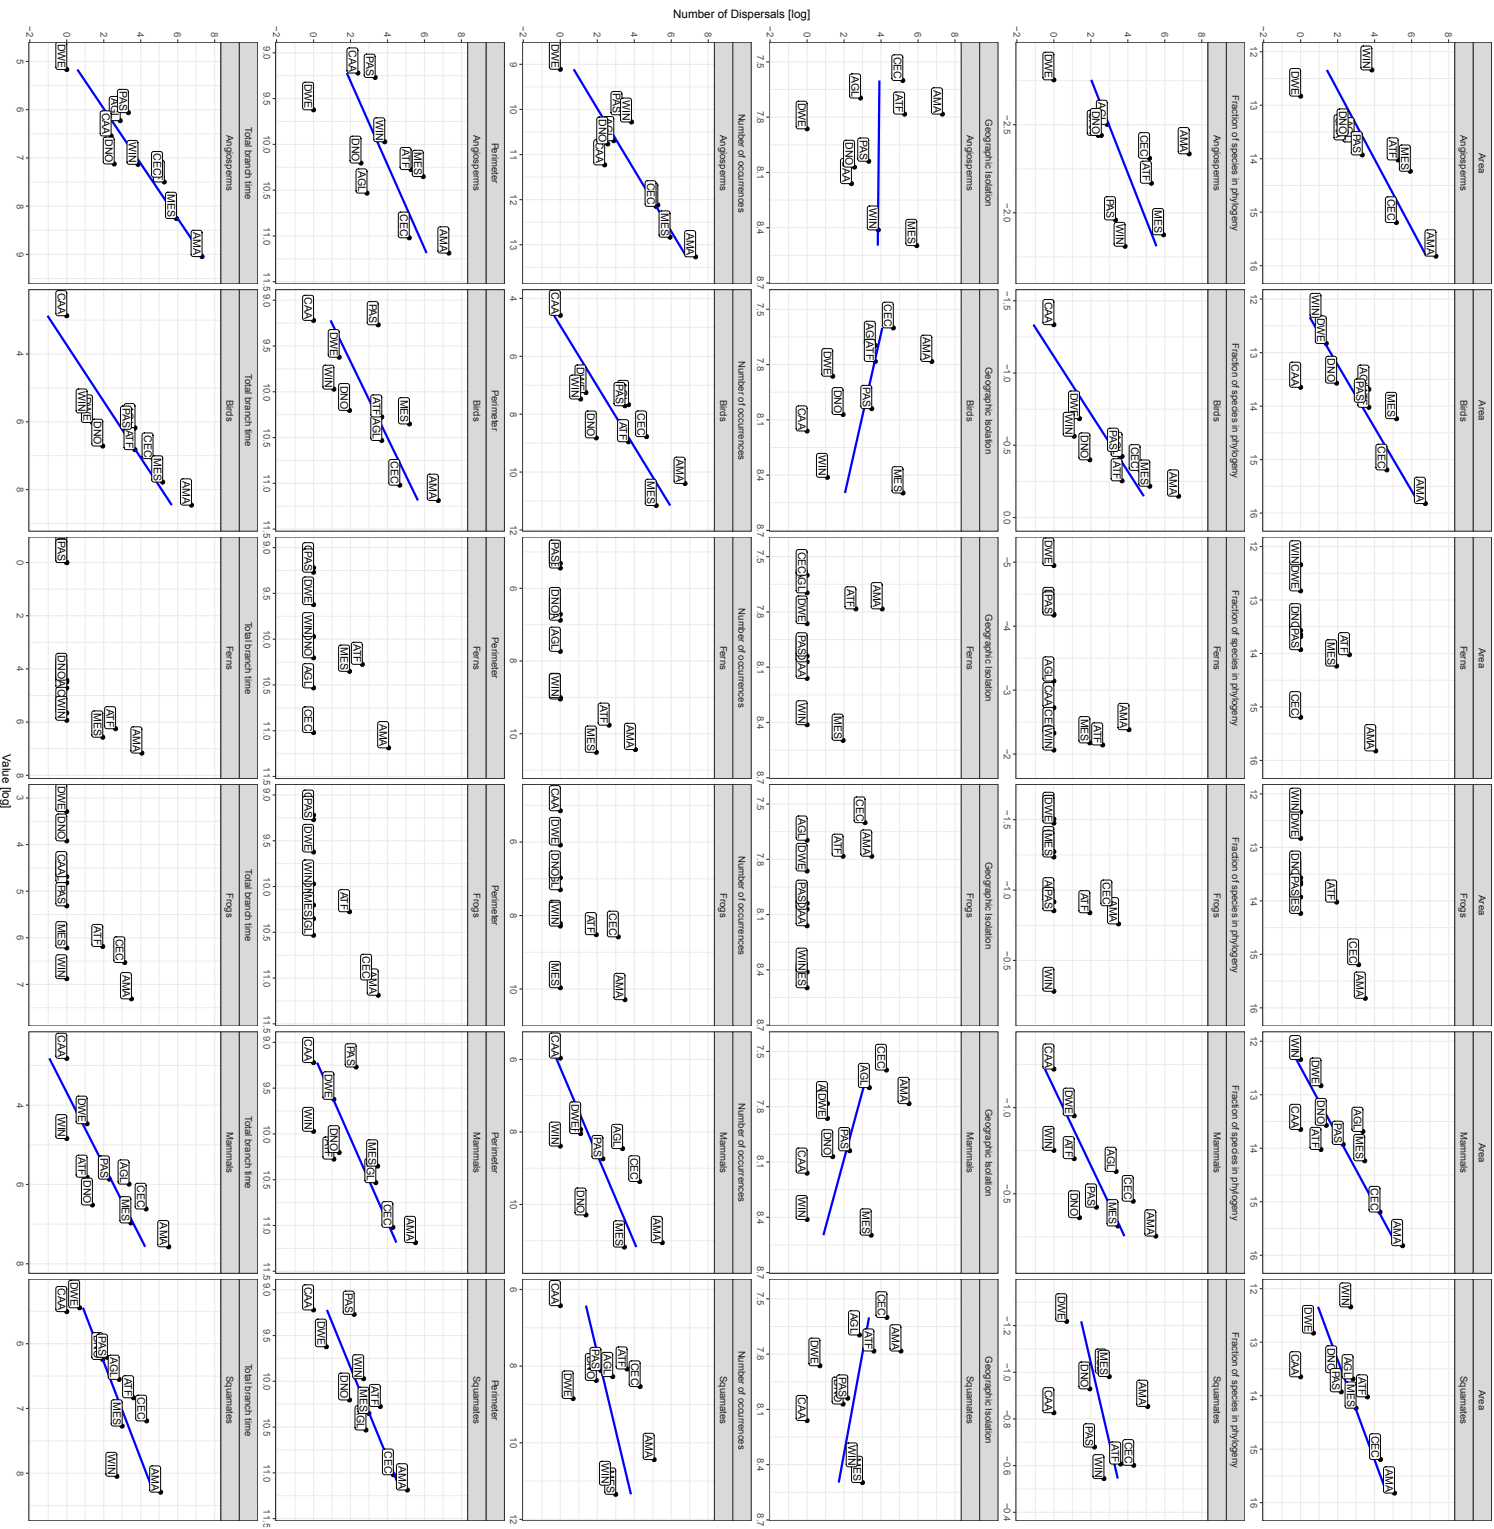



Fig. S15: Relation between phylogenetic sampling and branch time per region and clade. Colored lines show simple linear regression smoothers per clade. The black line shows a simple linear regression for the overall model.

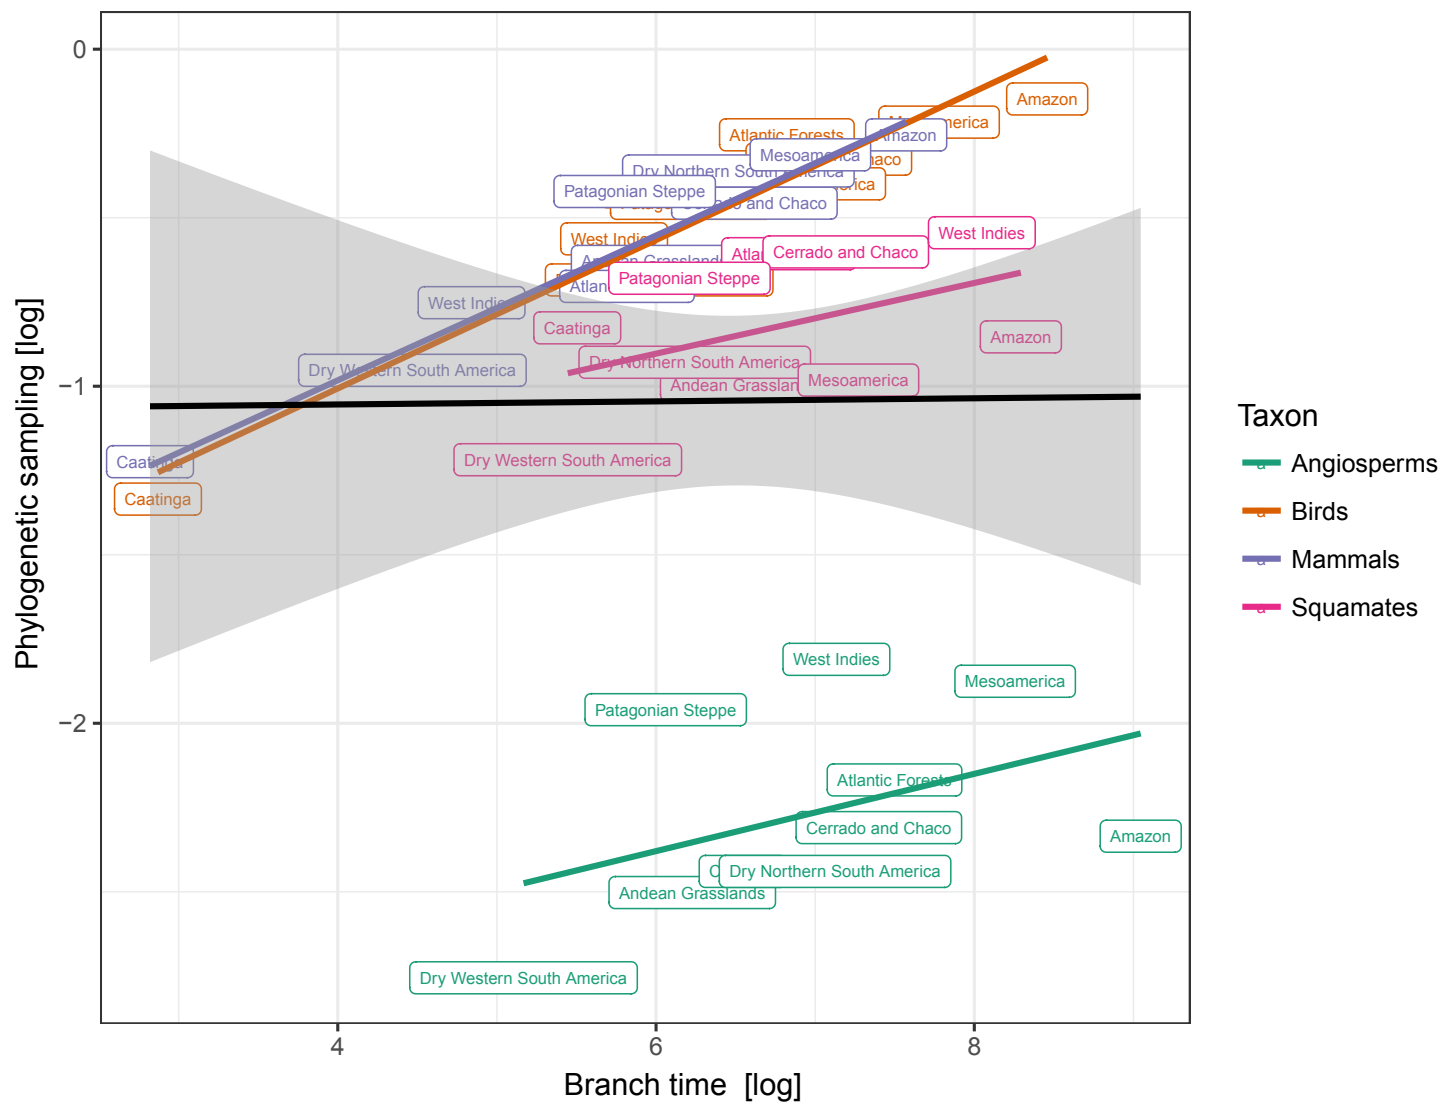

Fig. S16: Relation between phylogenetic sampling and number of occurrence records per area and clade. Colored lines show individual simple linear regression smoothers for each clade, the black line shows a simple overall linear regression. Note that the overall model suggests a negative relation due to the low phylogenetic sampling fraction in angiosperms.

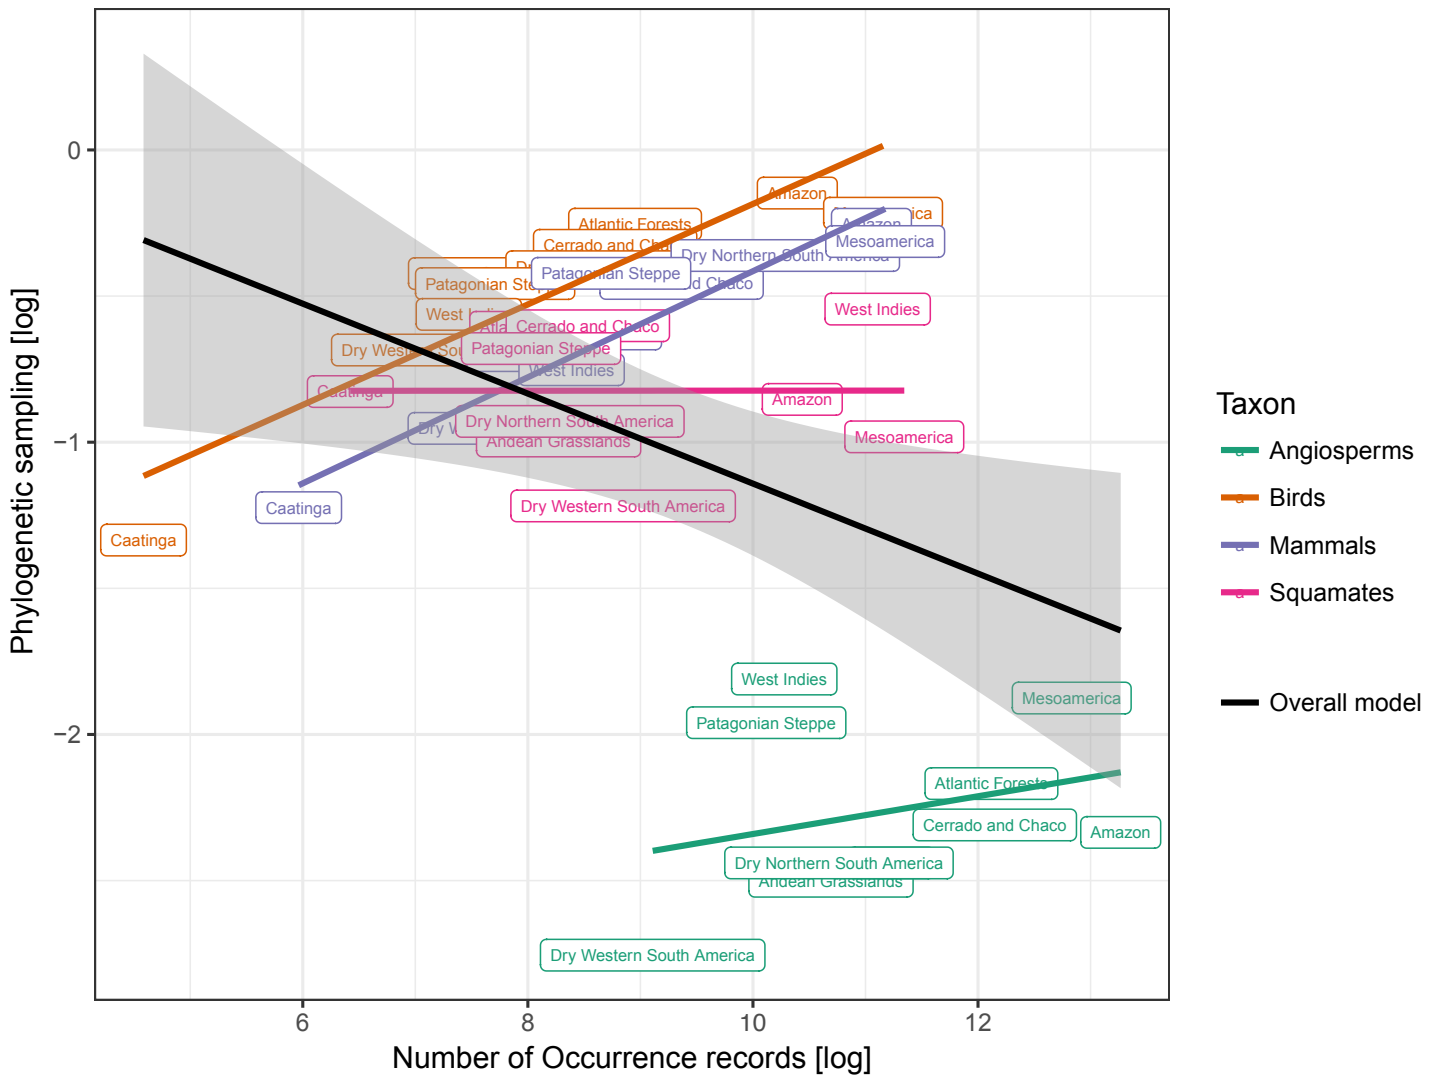

Fig. S17: Relation between emigration events and phylogenetic sampling for each study clade with sufficient data. The colored lines are individual simple linear regression smoothers.

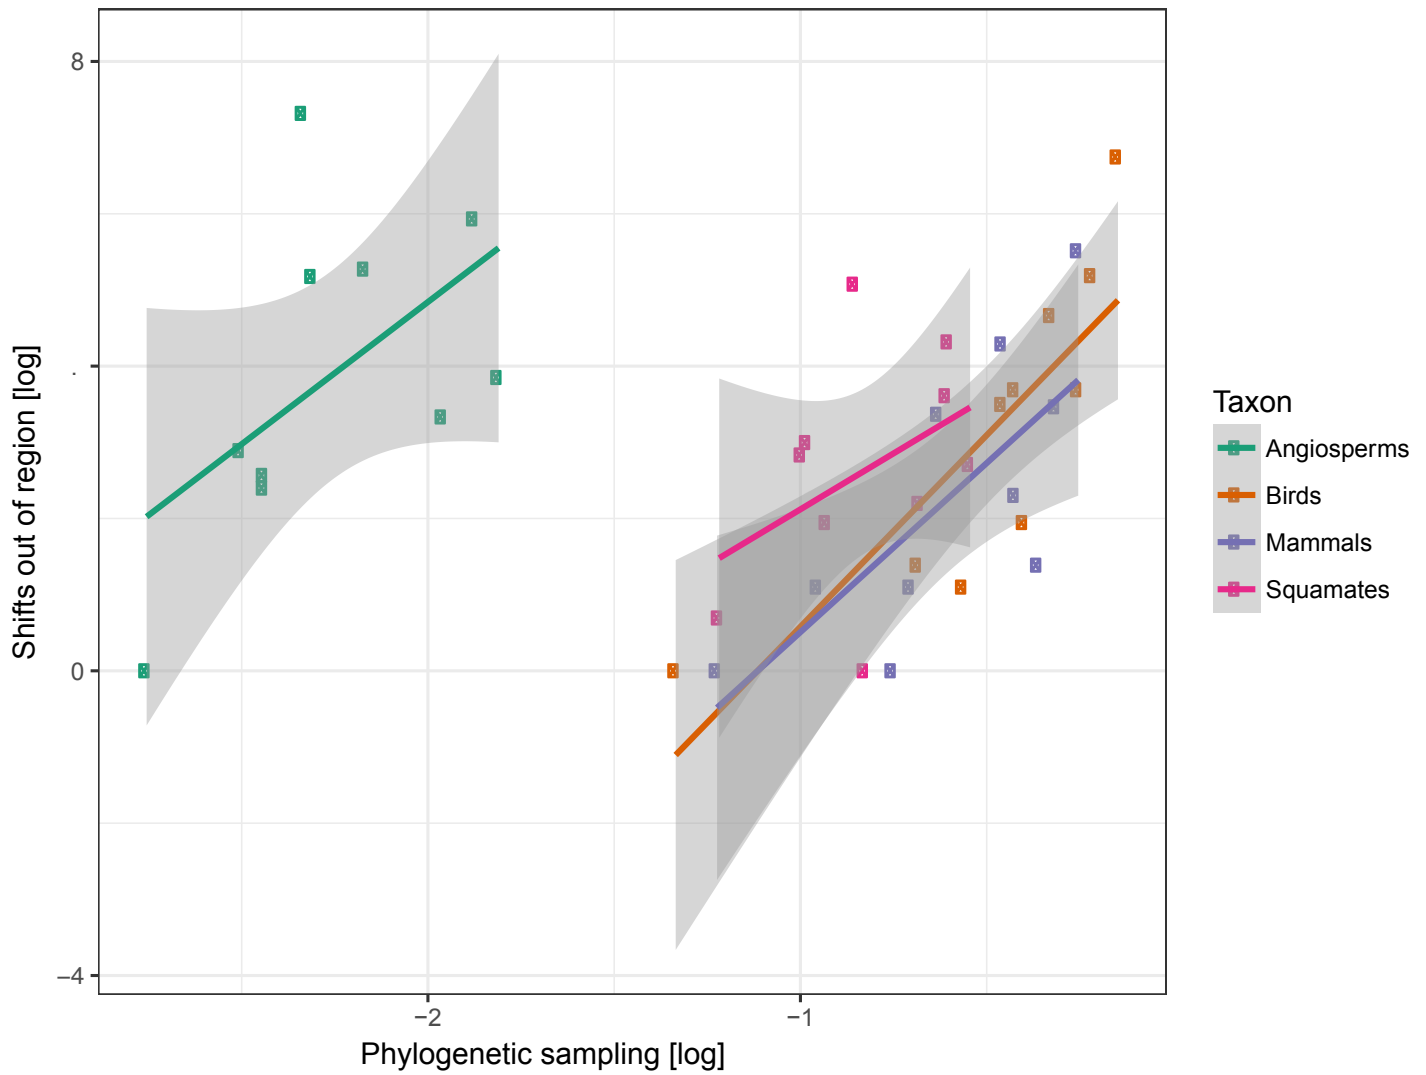

Fig. S18: Relation between emigration events and phylogenetic sampling, as identified by a simple overall linear regression across all study clades with sufficient data.

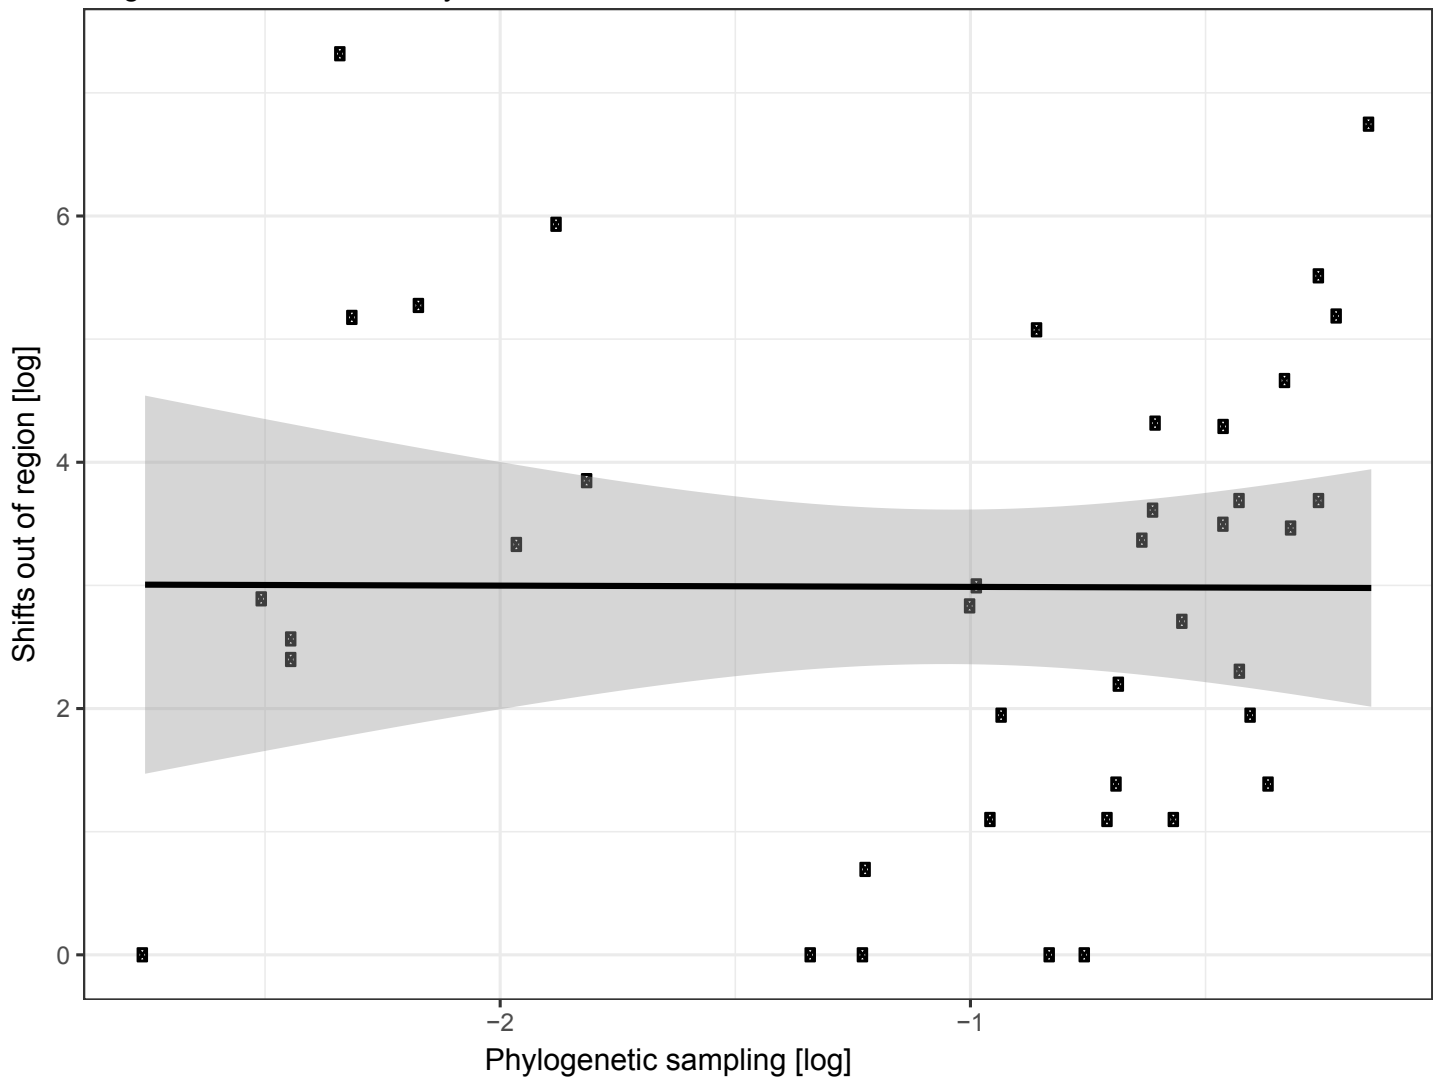

Fig. S19: Relation between emigration events and phylogenetic sampling as represented in the linear mixed effects model described in the main text. The colored lines show the partial response of emigration events to phylogenetic sampling for the four study clades with sufficient data, assuming all other predictors at their mean values. The points show raw data for illustration.

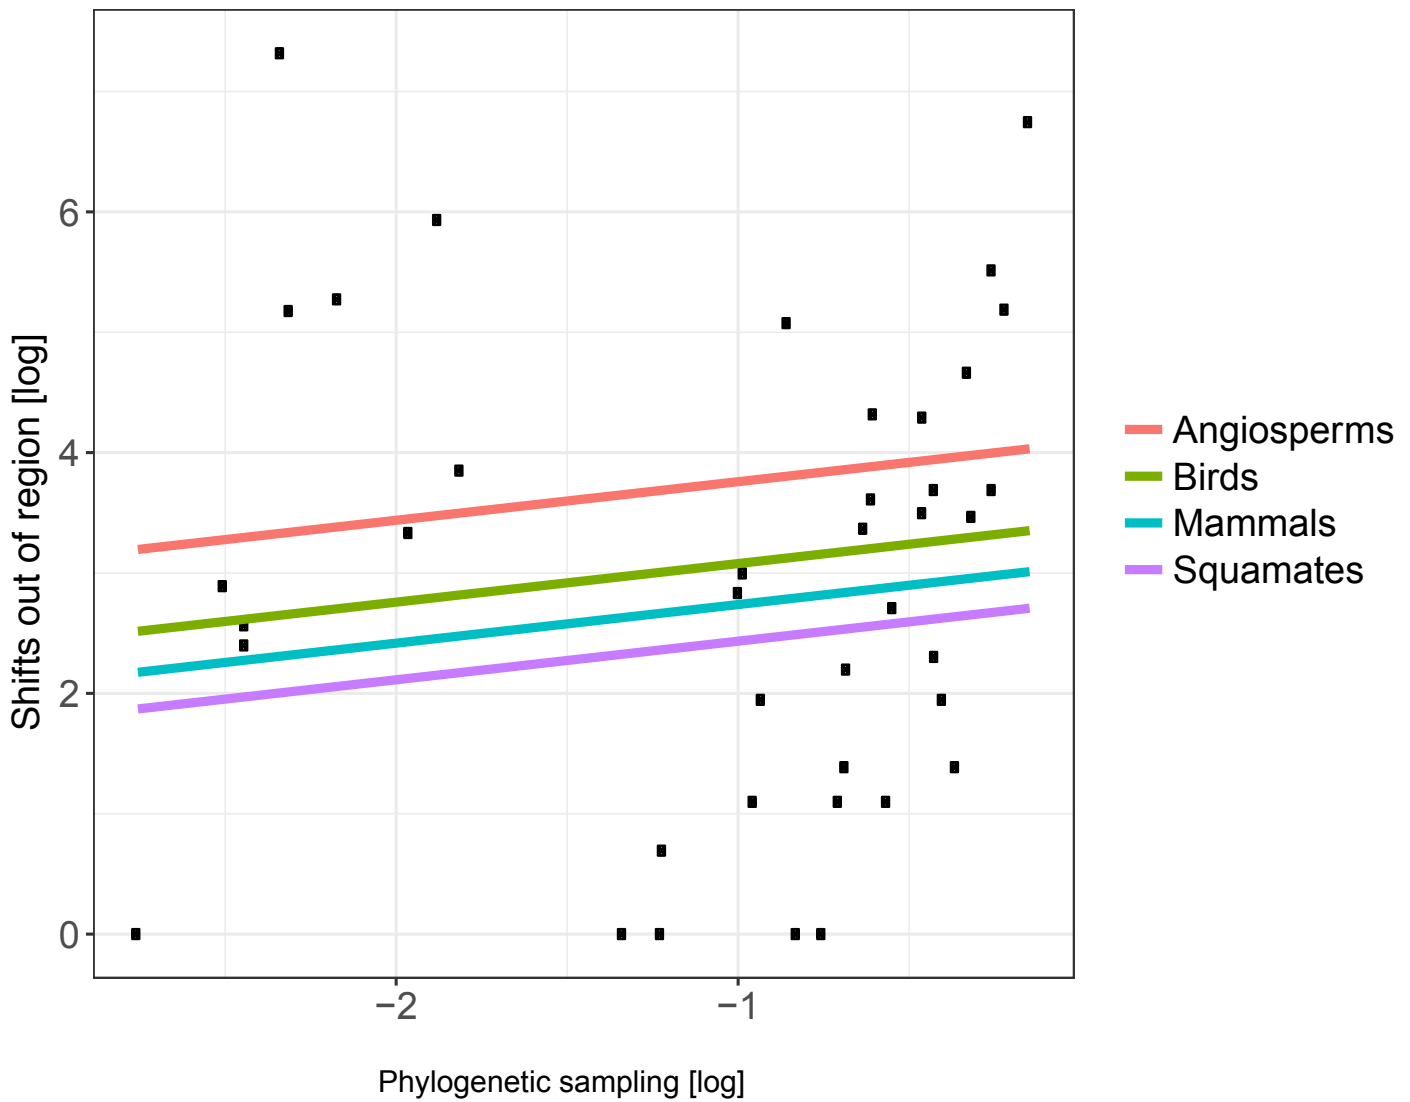

Fig. S20: Assessment of the altitudinal range comprised within the “Andean grasslands” region used in our analysis. The assessment was made by super-imposing the limits of this region on a topographic map obtained from WorldClim ([www.worldclim.org](http://www.worldclim.org)). Altitudes are provided as meters above sea level.

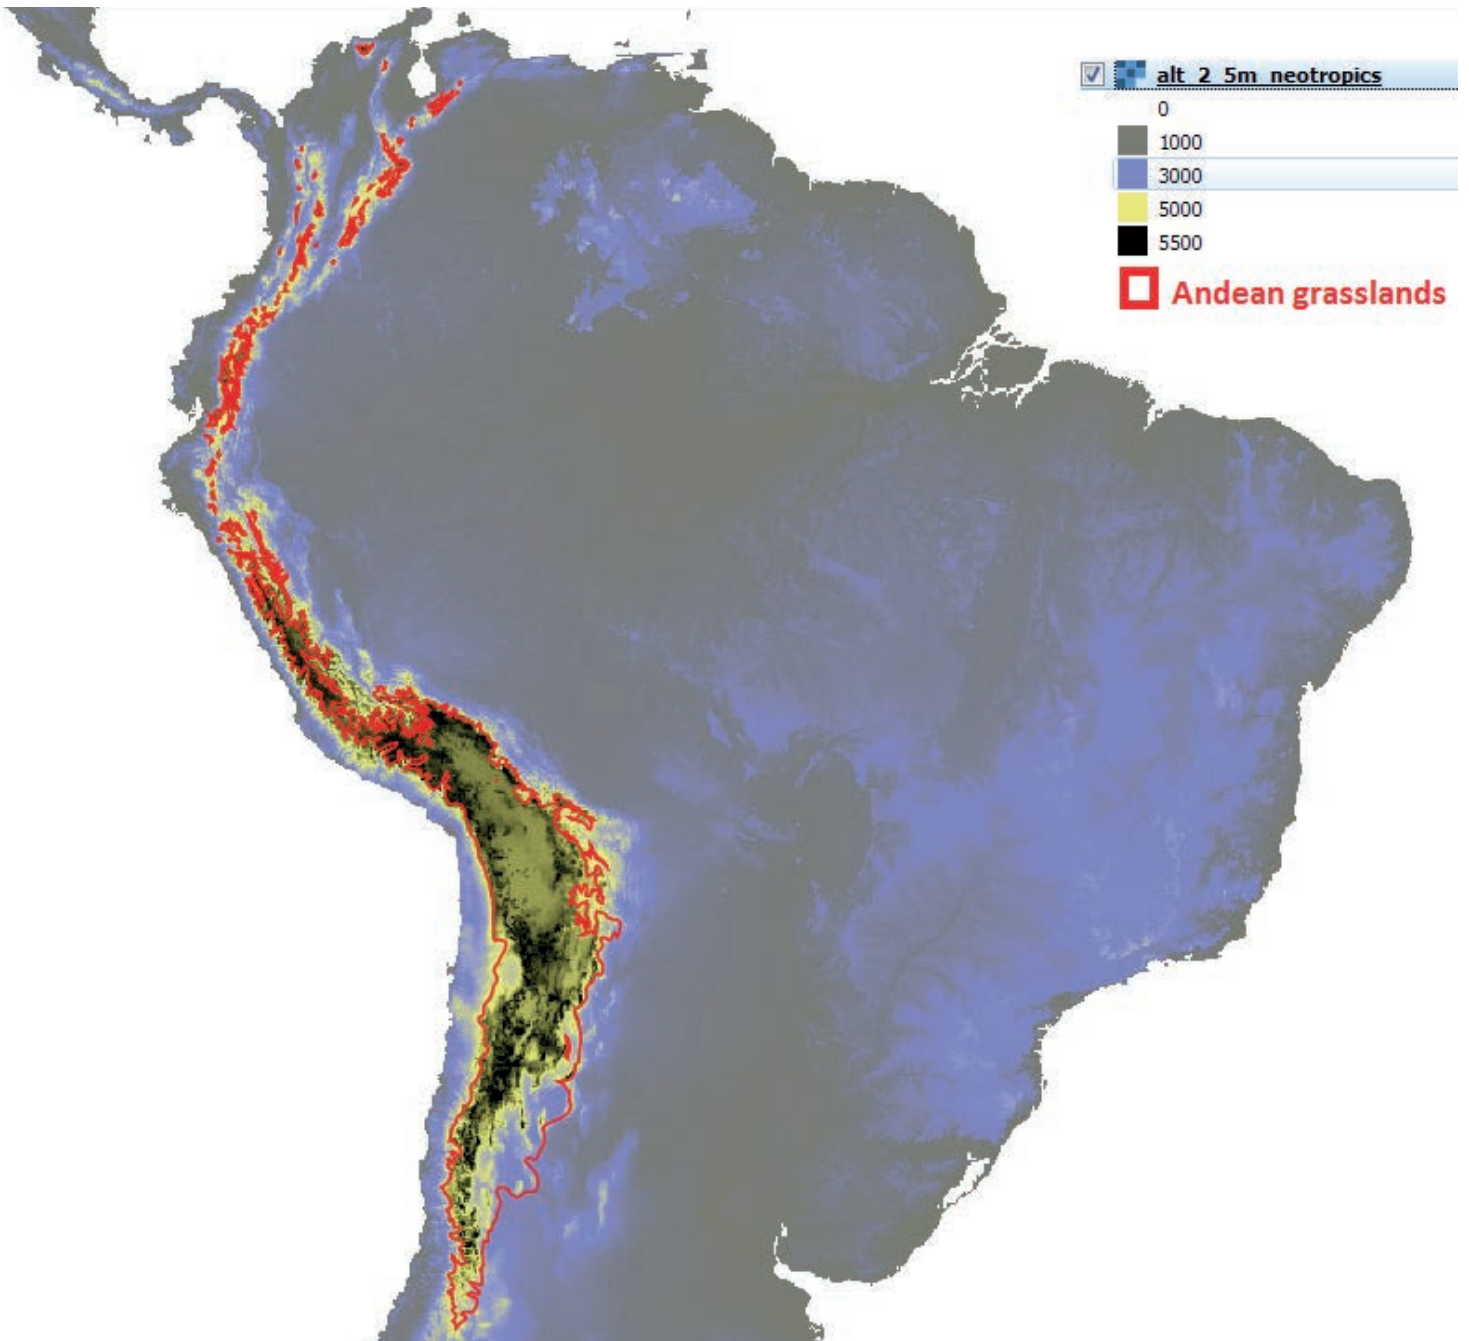



Fig. S21: Expert-defined area classification with simplified regions combining both biome borders and geological history, and the resulting cross-regional dispersal patterns inferred from the biogeographic analysis of all taxa surveyed.

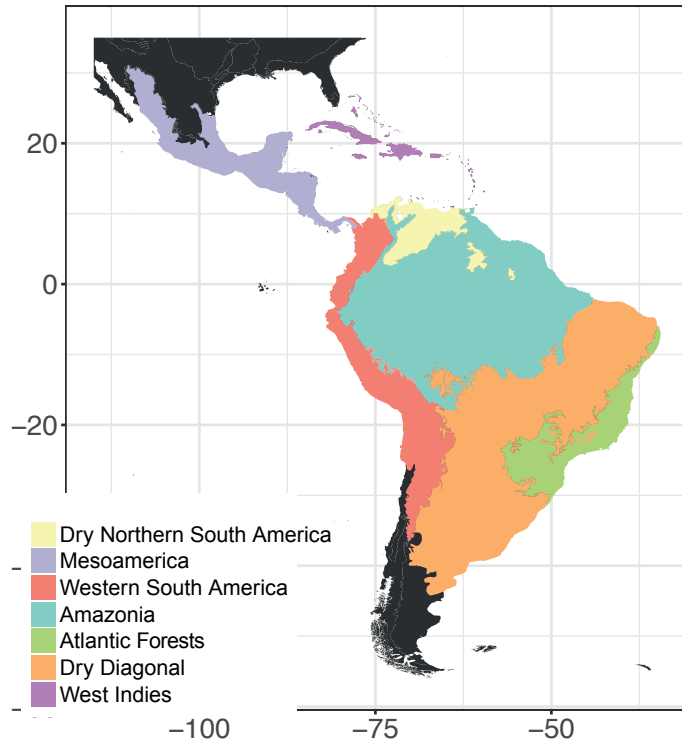

All taxa – only edges with weight > 10 shown

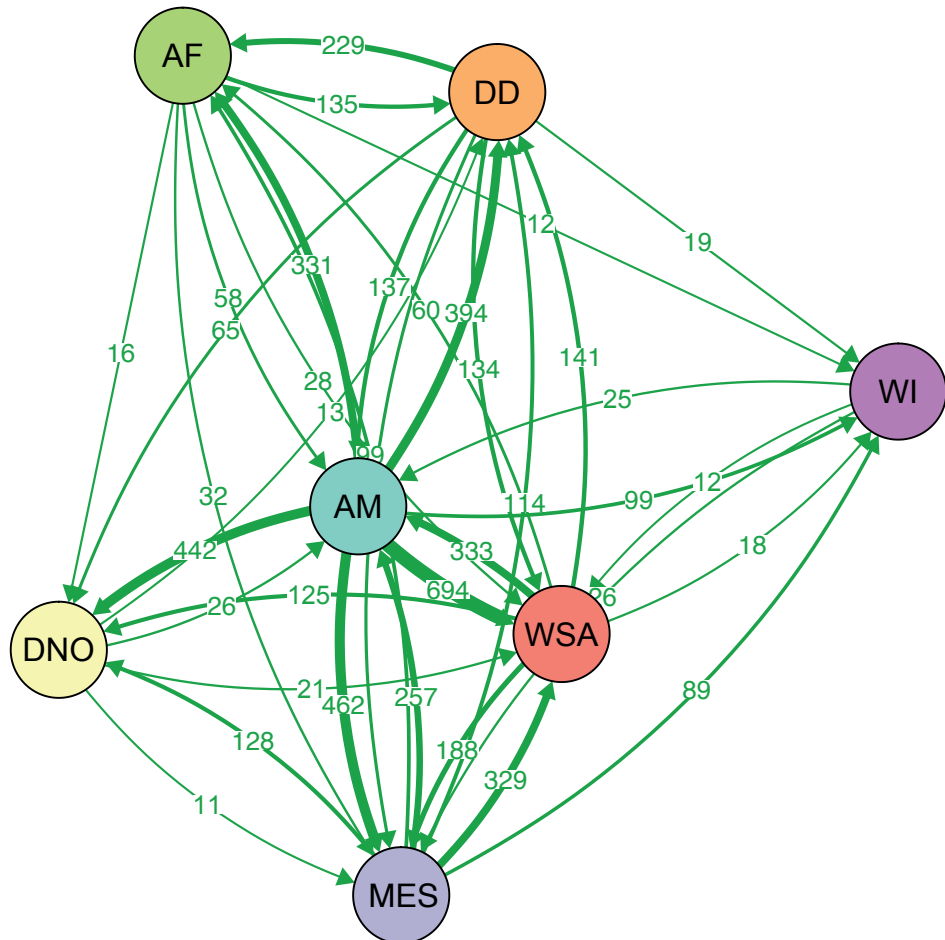

Fig. S22: Modifications of the biome classification to generate the operational units in this study.

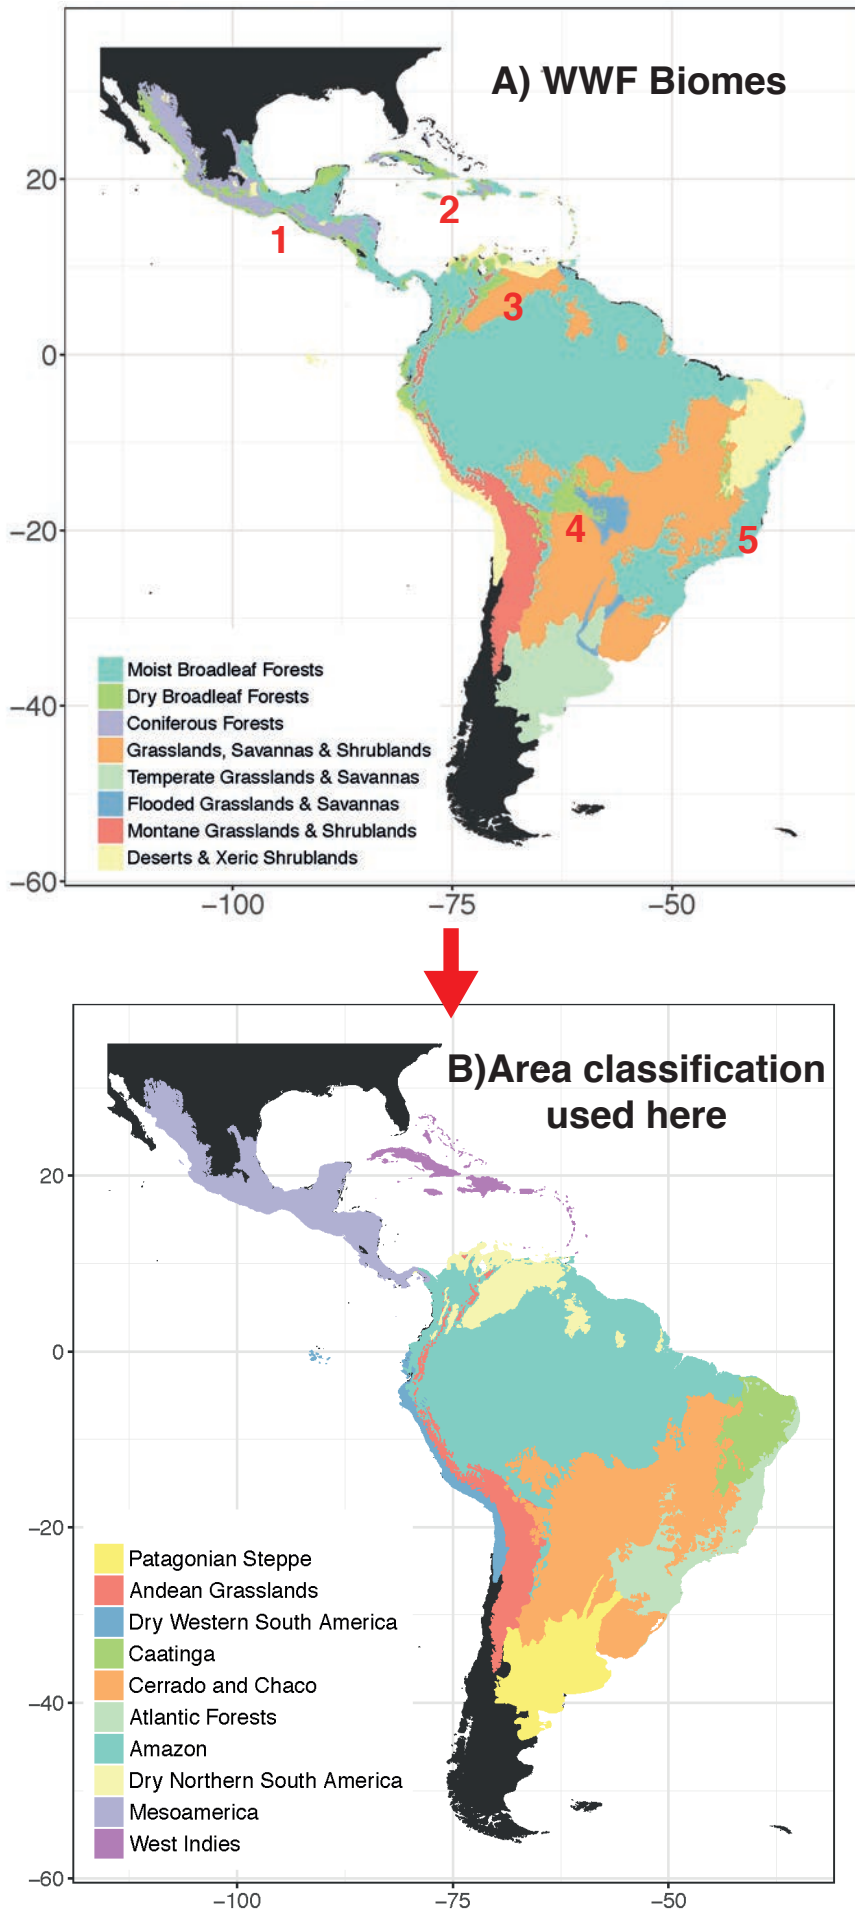

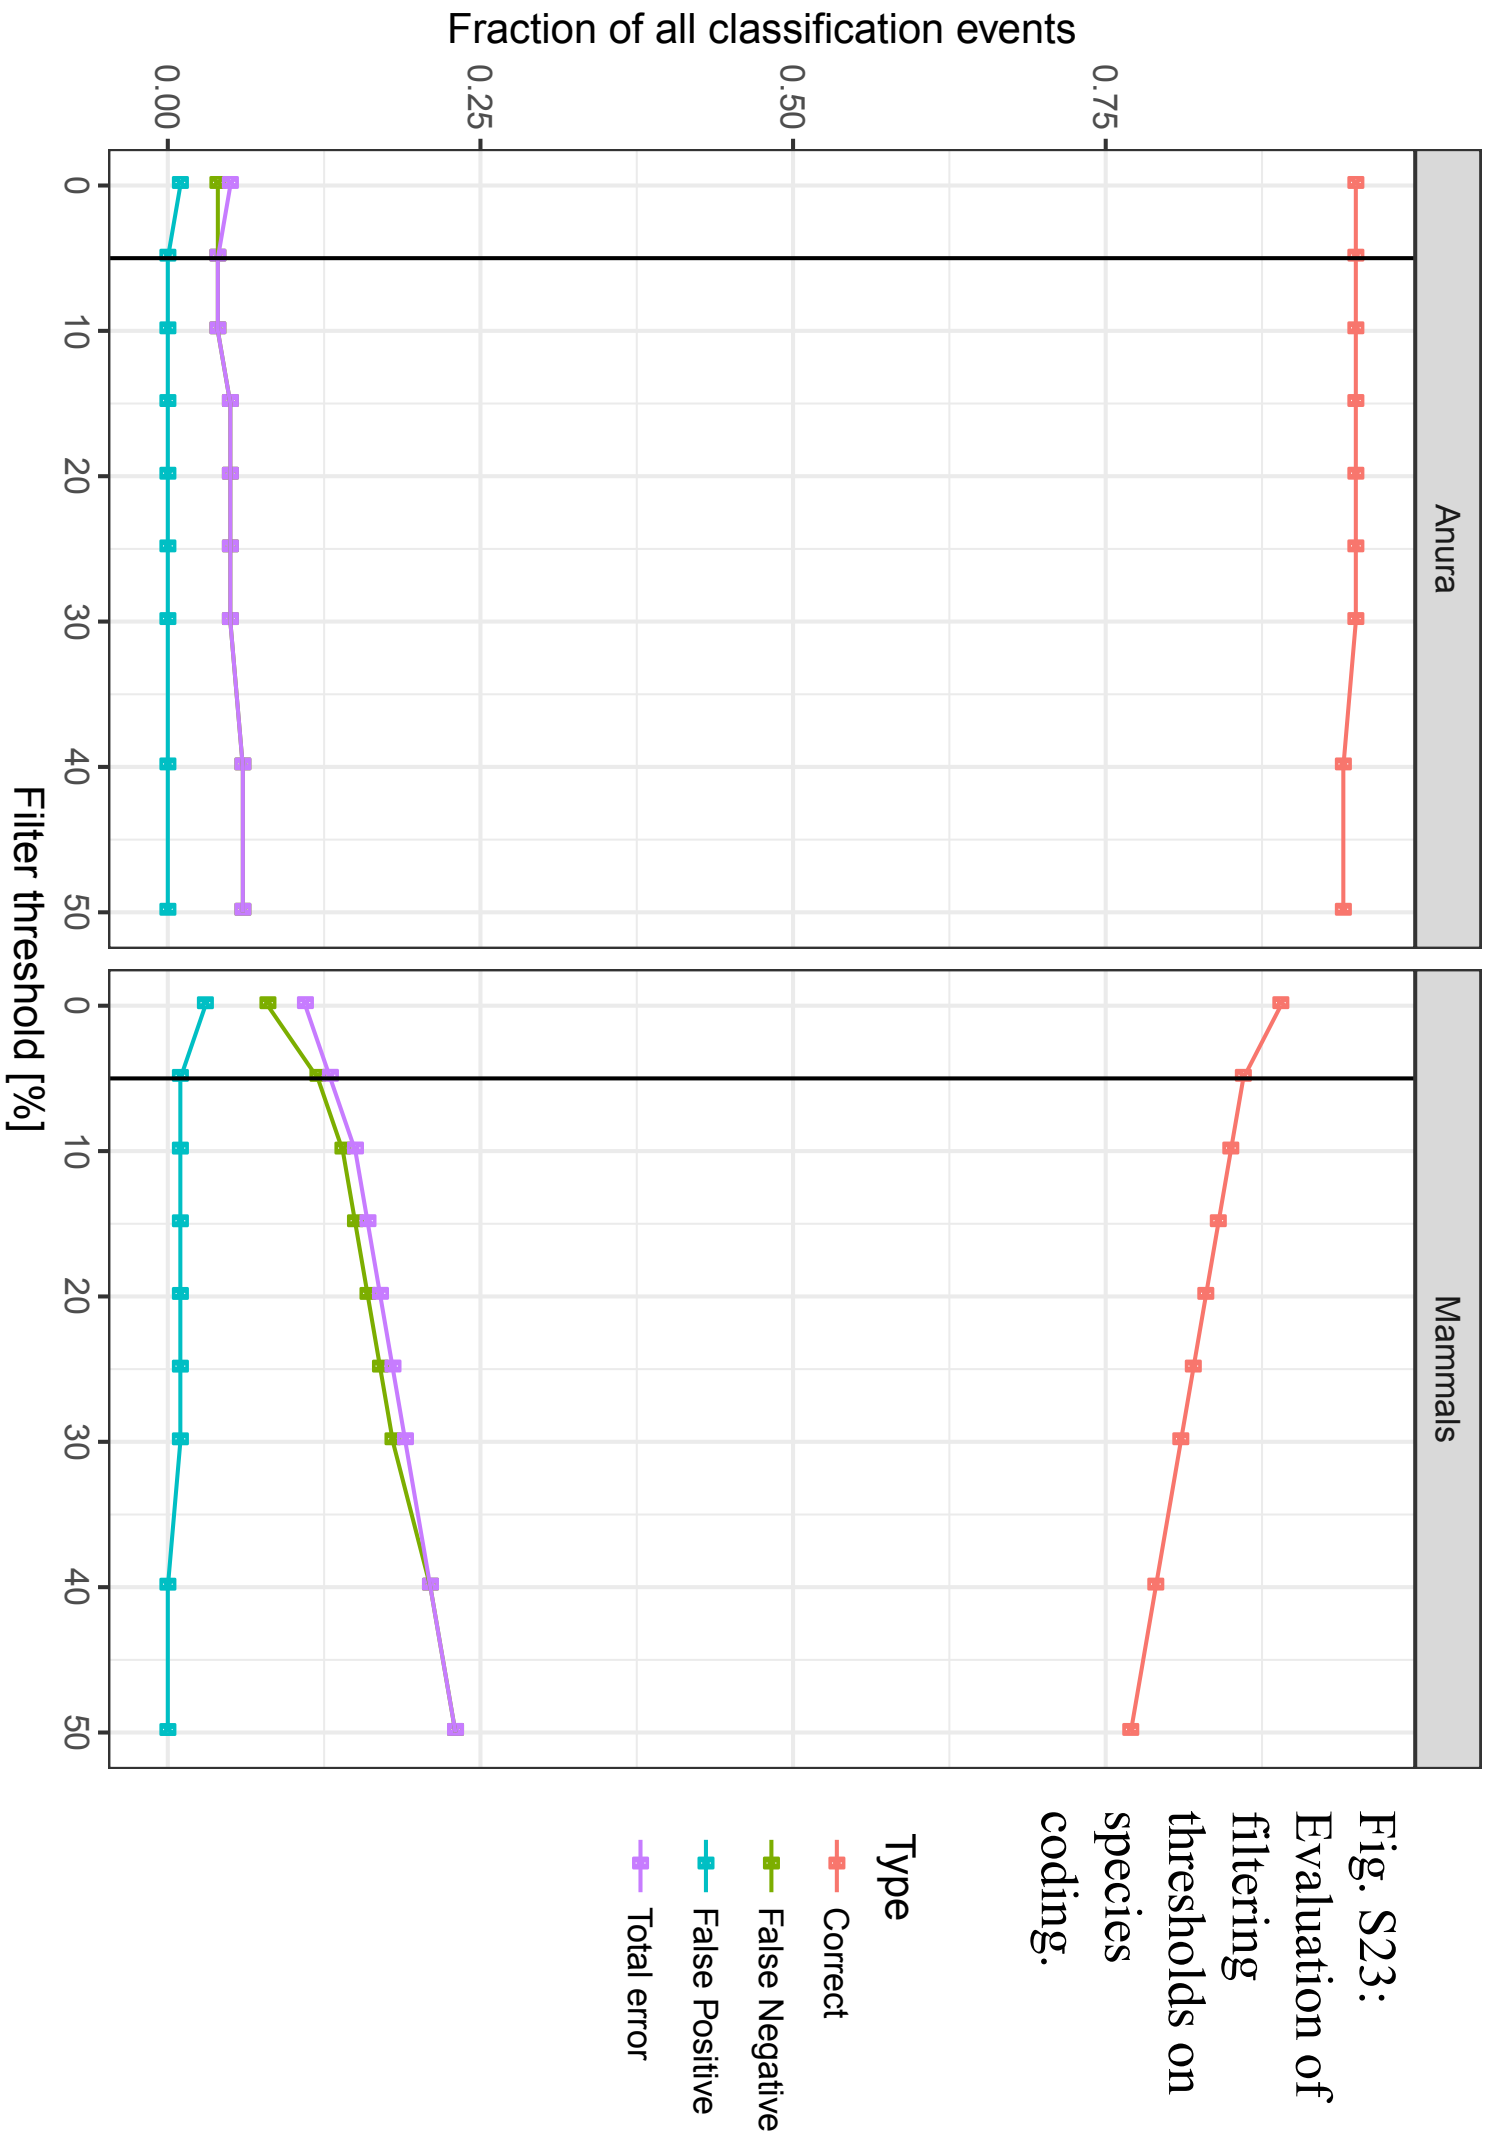

**Table S1.** Number of occurrence records per region, after the automated data cleaning.

| <b>Region</b>              | <b>Angiosperms</b> | <b>Birds</b> | <b>Ferns</b> | <b>Frogs</b> | <b>Mammals</b> | <b>Squamates</b> |
|----------------------------|--------------------|--------------|--------------|--------------|----------------|------------------|
| Amazon                     | 578216             | 32670        | 34056        | 29412        | 63131          | 34144            |
| Andean Grasslands          | 44069              | 2141         | 2285         | 1476         | 4714           | 3917             |
| Atlantic Forests           | 183352             | 7728         | 17405        | 5014         | 3118           | 3210             |
| Caatinga                   | 75284              | 98           | 970          | 172          | 389            | 615              |
| Cerrado and Chaco          | 188925             | 6474         | 8473         | 5325         | 11684          | 5079             |
| Dry Northern South America | 47310              | 6766         | 825          | 1068         | 29368          | 4330             |
| Dry Western South America  | 9038               | 1412         | 231          | 437          | 2789           | 6949             |
| Mesoamerica                | 374241             | 69994        | 36705        | 21246        | 71324          | 84522            |
| Patagonian Steppe          | 24786              | 2228         | 203          | 3705         | 6245           | 3352             |
| West Indies                | 29092              | 1765         | 8159         | 3968         | 4397           | 66718            |



|    |             |    |      |    |    |   |   |    |    |   |    |   |   |   |    |   |   |   |                                                                                                                                                                                                                                   |                              |
|----|-------------|----|------|----|----|---|---|----|----|---|----|---|---|---|----|---|---|---|-----------------------------------------------------------------------------------------------------------------------------------------------------------------------------------------------------------------------------------|------------------------------|
| 36 | Angiosperms | 10 | 22.7 | 5  | 2  | 0 | 3 | 2  | 0  | 0 | 9  | 1 | 0 | 0 | 9  | 1 | 0 | 0 | Adenaria, Cuphea                                                                                                                                                                                                                  |                              |
| 37 | Angiosperms | 10 | 19.6 | 9  | 1  | 0 | 2 | 1  | 3  | 0 | 6  | 0 | 0 | 0 | 6  | 0 | 0 | 0 | Bellucia, Henriettea, Henrietteia, Loreya                                                                                                                                                                                         |                              |
| 38 | Angiosperms | 90 | 12   | 78 | 22 | 4 | 8 | 18 | 28 | 2 | 53 | 0 | 0 | 0 | 53 | 0 | 0 | 0 | Adelobotrys, Gliemia, Conostegia, Eriocnema, Grafjenrieda, Leandra, Anathallis, Barbosella, Brachionidium, Dracula, Dryadella, Echinosepala, Fronderia, Lepanthes, Lepanthopsis, Masdevallia, Myoxanthus, Pabstella, Phileophila, |                              |
| 39 | Angiosperms | 41 | 6.4  | 28 | 6  | 1 | 2 | 1  | 2  | 0 | 18 | 4 | 0 | 0 | 18 | 4 | 0 | 0 | Solanum                                                                                                                                                                                                                           |                              |
| 4  | Angiosperms | 25 | 1.3  | 22 | 11 | 1 | 2 | 11 | 2  | 0 | 10 | 1 | 3 | 0 | 10 | 1 | 3 | 0 | Solanum                                                                                                                                                                                                                           |                              |
| 40 | Angiosperms | 10 | 4.2  | 7  | 8  | 3 | 1 | 5  | 0  | 0 | 2  | 0 | 1 | 0 | 2  | 0 | 1 | 0 | Colyptroanthus, Luma, Martleria, Myrcia,                                                                                                                                                                                          |                              |
| 41 | Angiosperms | 8  | 42.7 | 6  | 3  | 1 | 0 | 3  | 0  | 1 | 2  | 1 | 0 | 0 | 2  | 1 | 0 | 0 | Carica, Jacaratia, Vasconcellea                                                                                                                                                                                                   |                              |
| 42 | Angiosperms | 11 | 35.7 | 7  | 2  | 0 | 0 | 2  | 1  | 3 | 3  | 6 | 3 | 0 | 3  | 6 | 3 | 0 | Tropaeolum                                                                                                                                                                                                                        |                              |
| 43 | Angiosperms | 12 | 8.7  | 8  | 3  | 1 | 0 | 5  | 1  | 1 | 1  | 0 | 0 | 0 | 1  | 0 | 0 | 0 | Eriotheca, Pachira                                                                                                                                                                                                                |                              |
| 44 | Angiosperms | 54 | 20.6 | 30 | 4  | 1 | 3 | 6  | 8  | 0 | 25 | 0 | 0 | 0 | 25 | 0 | 0 | 0 | Bursera, Commiphora, Crepidospermum,                                                                                                                                                                                              |                              |
| 45 | Angiosperms | 9  | 1    | 8  | 6  | 3 | 1 | 7  | 1  | 0 | 6  | 0 | 0 | 0 | 6  | 0 | 0 | 0 | Carilospermum, Paullinia, Serjania, Urvillea                                                                                                                                                                                      |                              |
| 46 | Angiosperms | 10 | 2.2  | 8  | 2  | 1 | 0 | 4  | 4  | 0 | 4  | 0 | 0 | 0 | 4  | 0 | 0 | 0 | Cupania, Diiodendron, Matayba, Vouarava                                                                                                                                                                                           |                              |
| 47 | Angiosperms | 9  | 1.6  | 9  | 7  | 2 | 0 | 3  | 2  | 0 | 2  | 0 | 0 | 0 | 2  | 0 | 0 | 0 | Simba                                                                                                                                                                                                                             |                              |
| 48 | Angiosperms | 18 | 26.6 | 16 | 4  | 2 | 1 | 3  | 8  | 0 | 5  | 0 | 0 | 0 | 5  | 0 | 0 | 0 | Chrysobalanus, Caeplia, Hirella, Licania                                                                                                                                                                                          |                              |
| 49 | Angiosperms | 15 | 6.5  | 8  | 3  | 2 | 6 | 5  | 4  | 0 | 6  | 1 | 1 | 0 | 6  | 1 | 1 | 0 | Phyllanthus                                                                                                                                                                                                                       |                              |
| 5  | Angiosperms | 21 | 5.9  | 11 | 7  | 6 | 5 | 7  | 3  | 0 | 8  | 0 | 0 | 0 | 8  | 0 | 0 | 0 | Amphitecna, Crescentia, Cybistox,                                                                                                                                                                                                 |                              |
| 50 | Angiosperms | 12 | 2.9  | 4  | 4  | 1 | 1 | 0  | 1  | 0 | 12 | 0 | 0 | 0 | 12 | 0 | 0 | 0 | Godmania, Handroanthus, Sportosperma, Prosthechea                                                                                                                                                                                 |                              |
| 51 | Angiosperms | 30 | 41.4 | 22 | 5  | 3 | 4 | 2  | 8  | 0 | 16 | 1 | 0 | 0 | 16 | 1 | 0 | 0 | Chrysobalanus, Clusia, Dystovomita,                                                                                                                                                                                               |                              |
| 52 | Angiosperms | 16 | 18.7 | 11 | 8  | 3 | 1 | 7  | 0  | 0 | 8  | 2 | 1 | 0 | 8  | 2 | 1 | 0 | Possiflora, Tetrastylis                                                                                                                                                                                                           |                              |
| 53 | Angiosperms | 13 | 31.4 | 10 | 2  | 1 | 1 | 3  | 2  | 0 | 4  | 2 | 2 | 0 | 4  | 2 | 2 | 0 | Abatia, Banara, Neosprucea, Prockia                                                                                                                                                                                               |                              |
| 54 | Angiosperms | 20 | 69.2 | 15 | 5  | 4 | 4 | 6  | 8  | 0 | 4  | 0 | 0 | 0 | 4  | 0 | 0 | 0 | Acantharea, Blepharandra, Byssonima, Coleostachys, Diacida, Galpinia,                                                                                                                                                             |                              |
| 55 | Angiosperms | 12 | 14.1 | 2  | 4  | 2 | 0 | 8  | 0  | 0 | 3  | 0 | 0 | 0 | 3  | 0 | 0 | 4 | Aspicarpa, Cordobia, Gallardo,                                                                                                                                                                                                    |                              |
| 56 | Angiosperms | 17 | 37   | 13 | 3  | 2 | 1 | 6  | 8  | 0 | 8  | 1 | 1 | 0 | 8  | 1 | 1 | 0 | Chiloscolus, Glycydendron, Hevea, Manihot,                                                                                                                                                                                        |                              |
| 57 | Angiosperms | 14 | 10.6 | 4  | 2  | 0 | 4 | 4  | 0  | 0 | 6  | 1 | 3 | 0 | 6  | 1 | 3 | 0 | Croton                                                                                                                                                                                                                            |                              |
| 58 | Angiosperms | 11 | 2.8  | 6  | 4  | 4 | 3 | 3  | 2  | 0 | 5  | 0 | 0 | 0 | 5  | 0 | 0 | 0 | Croton                                                                                                                                                                                                                            |                              |
| 59 | Angiosperms | 10 | 1.8  | 7  | 4  | 1 | 1 | 3  | 0  | 0 | 4  | 1 | 1 | 0 | 4  | 1 | 1 | 0 | Doyerea, Gurania, Helmontia, Psiguria,                                                                                                                                                                                            |                              |
| 6  | Angiosperms | 11 | 3.2  | 9  | 1  | 0 | 0 | 0  | 1  | 0 | 8  | 0 | 0 | 0 | 8  | 0 | 0 | 0 | Columnnea, Dymonia, Glossoloma,                                                                                                                                                                                                   |                              |
| 60 | Angiosperms | 24 | 25.5 | 23 | 2  | 0 | 0 | 2  | 1  | 0 | 10 | 0 | 0 | 0 | 10 | 0 | 0 | 0 | Castilla, Helicostylis, Maguire, Naucleopsis,                                                                                                                                                                                     |                              |
| 61 | Angiosperms | 13 | 4.4  | 5  | 2  | 0 | 0 | 1  | 2  | 0 | 8  | 0 | 0 | 0 | 8  | 0 | 0 | 0 | Barleria, Caularthron, Epidendrum,                                                                                                                                                                                                |                              |
| 62 | Angiosperms | 18 | 13.2 | 16 | 5  | 1 | 1 | 8  | 5  | 0 | 10 | 1 | 0 | 0 | 10 | 1 | 0 | 0 | Ficus                                                                                                                                                                                                                             |                              |
| 63 | Angiosperms | 11 | 2.8  | 11 | 0  | 0 | 0 | 0  | 6  | 0 | 0  | 0 | 0 | 0 | 0  | 0 | 0 | 0 | Brownea, Elizabetha, Macrolobium                                                                                                                                                                                                  |                              |
| 64 | Angiosperms | 10 | 1.1  | 2  | 1  | 0 | 1 | 1  | 1  | 1 | 8  | 0 | 0 | 0 | 8  | 0 | 0 | 0 | Leucaena, Lysiloma                                                                                                                                                                                                                |                              |
| 65 | Angiosperms | 28 | 4    | 19 | 11 | 7 | 2 | 15 | 6  | 0 | 9  | 1 | 4 | 0 | 9  | 1 | 4 | 0 | Microlobus, Mimosa, Parapiptadenia,                                                                                                                                                                                               |                              |
| 66 | Angiosperms | 56 | 1.1  | 55 | 11 | 4 | 1 | 12 | 15 | 2 | 26 | 1 | 0 | 0 | 26 | 1 | 0 | 0 | Aburerna, Albizia, Cathartium, Cedrelinga,                                                                                                                                                                                        |                              |
| 67 | Angiosperms | 15 | 15.7 | 10 | 7  | 4 | 3 | 7  | 2  | 1 | 4  | 1 | 0 | 0 | 4  | 1 | 0 | 0 | Brya, Centriolobium, Cranocarpus,                                                                                                                                                                                                 |                              |
| 68 | Angiosperms | 13 | 25.3 | 10 | 2  | 1 | 1 | 2  | 1  | 0 | 2  | 0 | 0 | 0 | 2  | 0 | 0 | 0 | Andira, Hymenolobium, Vataireopsis                                                                                                                                                                                                |                              |
| 69 | Angiosperms | 52 | 28.1 | 48 | 8  | 4 | 0 | 11 | 8  | 1 | 8  | 0 | 0 | 0 | 8  | 0 | 0 | 0 | Aldina, Amburana, Atetia, Bacoa,                                                                                                                                                                                                  |                              |
| 7  | Angiosperms | 18 | 4.7  | 14 | 0  | 0 | 0 | 3  | 2  | 2 | 10 | 1 | 0 | 0 | 10 | 1 | 0 | 0 | Candolleodendron, Cyathostegia, Digteryx,                                                                                                                                                                                         |                              |
| 70 | Angiosperms | 17 | 18.7 | 10 | 7  | 6 | 5 | 8  | 5  | 0 | 9  | 1 | 1 | 0 | 9  | 1 | 1 | 0 | Amalophyllon, Diasterna, Gloxinia, Goyazia,                                                                                                                                                                                       |                              |
| 71 | Angiosperms | 10 | 20.3 | 4  | 1  | 0 | 4 | 1  | 3  | 0 | 6  | 0 | 0 | 0 | 6  | 0 | 0 | 0 | Heppelia, Kohleria, Monogyte, Moussonia,                                                                                                                                                                                          |                              |
|    |             |    |      |    |    |   |   |    |    |   |    |   |   |   |    |   |   |   | Camptosema, Canavalia, Cleobulia, Cratylia,                                                                                                                                                                                       |                              |
|    |             |    |      |    |    |   |   |    |    |   |    |   |   |   |    |   |   |   |                                                                                                                                                                                                                                   | Coccoloba, Neornilispauighia |







|    |         |    |      |    |    |   |   |    |    |   |    |    |    |                                                                                                                                                                                                        |
|----|---------|----|------|----|----|---|---|----|----|---|----|----|----|--------------------------------------------------------------------------------------------------------------------------------------------------------------------------------------------------------|
| 40 | Birds   | 34 | 18   | 30 | 4  | 0 | 0 | 7  | 10 | 0 | 8  | 2  | 0  | <i>Andigena, Aulacorhynchus, Pteroglossus,</i>                                                                                                                                                         |
| 41 | Birds   | 18 | 9.6  | 14 | 3  | 0 | 0 | 5  | 3  | 1 | 1  | 0  | 0  | <i>Picumnus</i>                                                                                                                                                                                        |
| 42 | Birds   | 9  | 5.5  | 2  | 1  | 0 | 0 | 2  | 1  | 0 | 6  | 0  | 0  | <i>Melanerpes</i>                                                                                                                                                                                      |
| 43 | Birds   | 12 | 3.5  | 9  | 3  | 0 | 0 | 4  | 4  | 1 | 0  | 1  | 1  | <i>Veniliornis</i>                                                                                                                                                                                     |
| 44 | Birds   | 9  | 5.1  | 6  | 2  | 0 | 0 | 4  | 1  | 1 | 4  | 0  | 1  | <i>Campephilus</i>                                                                                                                                                                                     |
| 45 | Birds   | 17 | 14.8 | 16 | 1  | 0 | 0 | 2  | 2  | 0 | 1  | 3  | 0  | <i>Boissonneaua, Cytolaema, Ensifera, Heliodoxa, Ocreatus, Pterophanes,</i>                                                                                                                            |
| 46 | Birds   | 10 | 5.1  | 4  | 2  | 0 | 1 | 2  | 1  | 0 | 4  | 1  | 2  | <i>Colaptes</i>                                                                                                                                                                                        |
| 47 | Birds   | 9  | 12.9 | 5  | 2  | 0 | 0 | 3  | 2  | 0 | 3  | 1  | 0  | <i>Buteogallus, Harpyhaliaetus, Leucopternis</i>                                                                                                                                                       |
| 48 | Birds   | 9  | 23.9 | 5  | 4  | 0 | 0 | 5  | 1  | 0 | 3  | 1  | 3  | <i>Aramides, Paratrialus</i>                                                                                                                                                                           |
| 49 | Birds   | 14 | 16.2 | 8  | 2  | 1 | 3 | 4  | 3  | 1 | 7  | 0  | 2  | <i>Patagoniornis</i>                                                                                                                                                                                   |
| 5  | Birds   | 63 | 16.3 | 35 | 15 | 0 | 6 | 18 | 22 | 8 | 26 | 0  | 3  | <i>Attila, Casinornis, Deltarhynchus, Empidonomus, Legatus, Mochetornis, Megarynchus, Myiarchus, Myiodynastes,</i>                                                                                     |
| 50 | Birds   | 16 | 20.9 | 11 | 4  | 0 | 0 | 5  | 4  | 4 | 6  | 4  | 1  | <i>Clarus, Columbiga, Metropelia, Uropelia</i>                                                                                                                                                         |
| 51 | Birds   | 15 | 14.2 | 14 | 0  | 0 | 0 | 4  | 2  | 2 | 0  | 7  | 0  | <i>Aglaeactis, Coeligena, Lafresnaya</i>                                                                                                                                                               |
| 52 | Birds   | 27 | 20.8 | 16 | 2  | 0 | 5 | 8  | 7  | 0 | 9  | 1  | 0  | <i>Androdon, Anthracoceros, Augastes, Coliitorax, Chrysolaemus, Colibri, Doryfera,</i>                                                                                                                 |
| 53 | Birds   | 31 | 22.7 | 28 | 3  | 0 | 0 | 3  | 6  | 1 | 9  | 1  | 0  | <i>Eutoxeres, Glaucis, Phaeothornis,</i>                                                                                                                                                               |
| 54 | Birds   | 9  | 23   | 3  | 1  | 0 | 0 | 4  | 1  | 2 | 3  | 3  | 2  | <i>Caracara, Daptrius, Ibycter, Milvago,</i>                                                                                                                                                           |
| 6  | Birds   | 80 | 17.2 | 28 | 12 | 0 | 2 | 19 | 8  | 3 | 28 | 15 | 14 | <i>Agrionis, Aphanotriccus, Cnemarchus, Cnemotriccus, Cortopus, Empidonax, Hymenops, Knipolegus, Lathrotricus, Lessonia, Mitrephanes, Muscipipra, Iodopleura, Lanisoma, Laniocera,</i>                 |
| 7  | Birds   | 27 | 27.6 | 21 | 11 | 0 | 0 | 8  | 6  | 4 | 9  | 0  | 4  | <i>Antiochia, Chiroxipha, Corapipo, Heterocercus, Illicura, Lepidochirus,</i>                                                                                                                          |
| 8  | Birds   | 45 | 14.6 | 39 | 4  | 0 | 0 | 7  | 12 | 0 | 7  | 1  | 0  | <i>Botara, Cymbilaimus, Dichrozona, Frederickena, Hypoedeleus, Mackenziaena,</i>                                                                                                                       |
| 9  | Birds   | 16 | 16.6 | 12 | 4  | 0 | 0 | 2  | 1  | 0 | 2  | 0  | 1  | <i>Aspleniium</i>                                                                                                                                                                                      |
| 1  | Ferns   | 9  | 39.5 | 7  | 7  | 0 | 4 | 3  | 0  | 0 | 6  | 0  | 0  | <i>Campyloneurum, Microgramma, Niphidium</i>                                                                                                                                                           |
| 2  | Ferns   | 18 | 77.4 | 15 | 6  | 2 | 5 | 4  | 0  | 0 | 10 | 1  | 0  | <i>Polypodium, Serpocaulon</i>                                                                                                                                                                         |
| 3  | Ferns   | 16 | 69.3 | 13 | 4  | 2 | 1 | 5  | 2  | 0 | 9  | 4  | 0  | <i>Trichomanes</i>                                                                                                                                                                                     |
| 4  | Ferns   | 10 | 99.5 | 8  | 2  | 0 | 4 | 1  | 0  | 0 | 6  | 0  | 0  | <i>Chironectes, Didelphis, Lutreolina,</i>                                                                                                                                                             |
| 1  | Mammals | 13 | 36.5 | 10 | 2  | 0 | 0 | 4  | 4  | 0 | 4  | 3  | 2  | <i>Anoura, Brachyphylla, Choerorniscus, Choeronycteris, Epophylla, Glossophaga, Hylonycteris, Leptoncyteris, Lichonycteris,</i>                                                                        |
| 10 | Mammals | 33 | 22.7 | 15 | 1  | 2 | 7 | 0  | 9  | 2 | 15 | 0  | 0  | <i>Ametrida, Artibeus, Carollia, Centurio, Chiroderma, Ectophylla, Enchisthenes, Mesophylla, Phyllopus, Platyrrhinus</i>                                                                               |
| 11 | Mammals | 67 | 22.8 | 57 | 3  | 0 | 4 | 8  | 30 | 3 | 31 | 1  | 1  | <i>Eumops, Molossus, Promops</i>                                                                                                                                                                       |
| 12 | Mammals | 18 | 22.5 | 12 | 2  | 0 | 1 | 8  | 9  | 2 | 10 | 1  | 3  | <i>Ctenomys</i>                                                                                                                                                                                        |
| 13 | Mammals | 23 | 9.6  | 7  | 0  | 0 | 0 | 14 | 0  | 0 | 0  | 6  | 6  | <i>Heteromys, Liomys</i>                                                                                                                                                                               |
| 2  | Mammals | 11 | 10.6 | 2  | 0  | 0 | 1 | 0  | 2  | 0 | 9  | 0  | 0  | <i>Andalgalomys, Andinomys, Auliscomys, Bianomys, Calomys, Chirchillula, Delomys, Abrothrix, Akodon, Deltomys, Necromys, Chilomys, Elignodontia, Holochilus, Juscelinomys, Lundomys, Oligoryzomys,</i> |
| 3  | Mammals | 51 | 15.7 | 29 | 4  | 0 | 0 | 21 | 8  | 6 | 1  | 18 | 5  |                                                                                                                                                                                                        |
| 4  | Mammals | 38 | 15.2 | 24 | 5  | 0 | 0 | 15 | 0  | 2 | 0  | 16 | 6  |                                                                                                                                                                                                        |
| 5  | Mammals | 24 | 9.6  | 13 | 3  | 0 | 0 | 14 | 2  | 2 | 2  | 8  | 5  |                                                                                                                                                                                                        |

|    |           |    |      |    |    |   |    |    |    |   |    |    |    |                                                                                                                                                                                                                                 |
|----|-----------|----|------|----|----|---|----|----|----|---|----|----|----|---------------------------------------------------------------------------------------------------------------------------------------------------------------------------------------------------------------------------------|
| 6  | Mammals   | 26 | 71.3 | 15 | 7  | 0 | 0  | 15 | 11 | 0 | 8  | 5  | 8  | <i>Bradyus, Cobassus, Collyptrophactus, Chaetophractus, Chlamyphorus, Choloepus, Cyclops, Desypus, Euphractus, Conepatus, Mephitis, Spilogale</i>                                                                               |
| 7  | Mammals   | 8  | 14.7 | 1  | 0  | 0 | 0  | 1  | 1  | 1 | 6  | 1  | 2  | <i>Balanitopteryx, Centronycteris, Cormura, Cytarops, Didelurus, Peronycteris, Chrototerus, Glyphonycteris, Lampronnycteris, Lophostoma, Macroty, Micronycteris, Mimon, Neonycteris, Coleodactylus, Pseudogonotodes, Anolis</i> |
| 8  | Mammals   | 18 | 34.9 | 13 | 0  | 0 | 0  | 0  | 11 | 0 | 9  | 0  | 0  | <i>Malburya</i>                                                                                                                                                                                                                 |
| 9  | Mammals   | 29 | 28.4 | 26 | 1  | 0 | 1  | 2  | 14 | 0 | 19 | 0  | 0  | <i>Bog, Corallus, Epicrates, Eunectes, Atropoides, Cerrophiidion, Porthidium, Bothriechis, Cerrophiidion, Lachesis, Micrurus</i>                                                                                                |
| 1  | Squamates | 41 | 69.2 | 5  | 1  | 0 | 34 | 1  | 3  | 0 | 2  | 0  | 0  | <i>Chironius, Dymarchon, Pseustes, Spilotes, Adelphicos, Atractus, Cryophis, Diapas, Geophis, Hydromorphus, Imantodes, Aisophis, Antillophis, Arrhyton, Darlingtonia, Erythrolamprus, Hysishynchus, Jaltrix, Sceloporus</i>     |
| 10 | Squamates | 11 | 36   | 0  | 0  | 0 | 11 | 0  | 0  | 0 | 0  | 0  | 0  | <i>Philodryas, Pseudablabes, Xenoxybelis</i>                                                                                                                                                                                    |
| 11 | Squamates | 24 | 33.1 | 0  | 0  | 0 | 24 | 0  | 1  | 0 | 1  | 0  | 0  | <i>Boiruna, Clelia, Drepanoides, Hydrodynastes, Oxyrhopus, Phymophis, Ameiva, Chemidophorus, Dicrodon</i>                                                                                                                       |
| 12 | Squamates | 17 | 25.2 | 11 | 7  | 1 | 1  | 6  | 2  | 0 | 3  | 1  | 2  | <i>Bachia</i>                                                                                                                                                                                                                   |
| 13 | Squamates | 11 | 44.8 | 6  | 1  | 0 | 4  | 4  | 3  | 0 | 4  | 0  | 0  | <i>Amphisbaena, Anops, Aulura, Lepostemon</i>                                                                                                                                                                                   |
| 14 | Squamates | 9  | 14.8 | 2  | 0  | 0 | 0  | 0  | 1  | 0 | 9  | 0  | 0  | <i>Stenocercus</i>                                                                                                                                                                                                              |
| 15 | Squamates | 13 | 21.1 | 3  | 1  | 0 | 0  | 0  | 1  | 0 | 13 | 0  | 0  | <i>Tropidurus</i>                                                                                                                                                                                                               |
| 16 | Squamates | 12 | 18.5 | 7  | 5  | 1 | 0  | 3  | 4  | 0 | 1  | 1  | 2  | <i>Ctenosaura</i>                                                                                                                                                                                                               |
| 17 | Squamates | 13 | 26   | 9  | 6  | 0 | 0  | 3  | 4  | 0 | 5  | 0  | 0  | <i>Enyalioides, Hoplacercus, Morunasaurus, Diplolaemus, Enyalius, Leiocaurus, Liolaemus</i>                                                                                                                                     |
| 18 | Squamates | 38 | 29.3 | 18 | 7  | 0 | 2  | 5  | 7  | 0 | 21 | 1  | 2  | <i>Liolaemus</i>                                                                                                                                                                                                                |
| 19 | Squamates | 48 | 32.7 | 15 | 11 | 1 | 22 | 18 | 3  | 0 | 3  | 1  | 11 | <i>Liolaeemus</i>                                                                                                                                                                                                               |
| 2  | Squamates | 38 | 19.8 | 0  | 0  | 0 | 0  | 0  | 0  | 0 | 38 | 0  | 0  | <i>Anolis</i>                                                                                                                                                                                                                   |
| 20 | Squamates | 10 | 25.1 | 6  | 4  | 2 | 0  | 7  | 0  | 0 | 0  | 2  | 4  | <i>Anolis</i>                                                                                                                                                                                                                   |
| 21 | Squamates | 26 | 31.3 | 18 | 10 | 1 | 1  | 12 | 5  | 0 | 2  | 1  | 4  | <i>Anolis</i>                                                                                                                                                                                                                   |
| 22 | Squamates | 8  | 65.3 | 5  | 3  | 1 | 0  | 5  | 2  | 1 | 0  | 1  | 2  |                                                                                                                                                                                                                                 |
| 23 | Squamates | 17 | 32.2 | 2  | 0  | 0 | 14 | 2  | 0  | 1 | 0  | 1  | 2  |                                                                                                                                                                                                                                 |
| 24 | Squamates | 11 | 45.9 | 10 | 1  | 0 | 1  | 1  | 2  | 0 | 0  | 0  | 0  |                                                                                                                                                                                                                                 |
| 25 | Squamates | 17 | 45.4 | 5  | 5  | 2 | 7  | 6  | 0  | 0 | 0  | 0  | 2  |                                                                                                                                                                                                                                 |
| 26 | Squamates | 32 | 43   | 27 | 1  | 0 | 0  | 3  | 0  | 9 | 0  | 8  | 1  |                                                                                                                                                                                                                                 |
| 27 | Squamates | 11 | 24.4 | 4  | 4  | 3 | 0  | 7  | 1  | 0 | 0  | 1  | 0  |                                                                                                                                                                                                                                 |
| 28 | Squamates | 9  | 20.3 | 0  | 0  | 0 | 0  | 0  | 0  | 0 | 9  | 0  | 0  |                                                                                                                                                                                                                                 |
| 3  | Squamates | 12 | 81.2 | 12 | 4  | 1 | 0  | 2  | 3  | 2 | 2  | 0  | 0  |                                                                                                                                                                                                                                 |
| 4  | Squamates | 9  | 42.2 | 2  | 2  | 0 | 0  | 4  | 0  | 0 | 0  | 4  | 5  |                                                                                                                                                                                                                                 |
| 5  | Squamates | 23 | 26.1 | 2  | 0  | 0 | 0  | 1  | 0  | 1 | 0  | 20 | 3  |                                                                                                                                                                                                                                 |
| 6  | Squamates | 11 | 11.8 | 1  | 0  | 0 | 0  | 1  | 0  | 1 | 0  | 10 | 0  |                                                                                                                                                                                                                                 |
| 7  | Squamates | 7  | 13.8 | 0  | 0  | 0 | 0  | 1  | 0  | 0 | 0  | 2  | 7  |                                                                                                                                                                                                                                 |
| 8  | Squamates | 37 | 39.9 | 29 | 0  | 0 | 7  | 0  | 5  | 1 | 4  | 2  | 0  |                                                                                                                                                                                                                                 |
| 9  | Squamates | 17 | 39.6 | 0  | 0  | 0 | 17 | 0  | 0  | 0 | 0  | 0  | 0  |                                                                                                                                                                                                                                 |

**Table S3. Paleogeographic model used for the time-stratified biogeographic analyses implemented in the dispersal–extinction–cladogenesis (DEC) model.** The model is built on connectivity matrices between areas, with connectivities evolving through time. For any combination of two areas, each matrix determines whether the areas are connected (1) or disconnected (0). When two areas are connected, dispersal events and range expansions are allowed in the biogeographic reconstruction, and an ancestor could have been distributed in a range composed of these two areas and more. This simple model is based on current knowledge of Neotropical paleogeography and biome evolution, but should be viewed as a hypothesis to be further refined and tested.

**Time period: 0 to 9 Ma**

|                            | Amazonia | Atlantic Forests | Caatinga | West Indies | Cerrado and Chaco | Dry Northern South America | Dry Western South America | Andean Grasslands | Mesoamerica | Patagonian Steppe |
|----------------------------|----------|------------------|----------|-------------|-------------------|----------------------------|---------------------------|-------------------|-------------|-------------------|
| Amazonia                   | 1        | 0                | 1        | 1           | 1                 | 1                          | 1                         | 1                 | 1           | 0                 |
| Atlantic Forests           | 0        | 1                | 1        | 0           | 1                 | 0                          | 0                         | 0                 | 0           | 1                 |
| Caatinga                   | 1        | 1                | 1        | 0           | 1                 | 0                          | 0                         | 0                 | 0           | 0                 |
| West Indies                | 1        | 0                | 0        | 1           | 0                 | 1                          | 0                         | 0                 | 1           | 0                 |
| Cerrado and Chaco          | 1        | 1                | 1        | 0           | 1                 | 0                          | 0                         | 1                 | 0           | 1                 |
| Dry Northern South America | 1        | 0                | 0        | 1           | 0                 | 1                          | 0                         | 1                 | 0           | 0                 |
| Dry Western South America  | 1        | 0                | 0        | 0           | 0                 | 0                          | 1                         | 1                 | 0           | 0                 |
| Mesoamerica                | 1        | 0                | 0        | 1           | 0                 | 0                          | 0                         | 0                 | 1           | 0                 |
| Andean Grasslands          | 1        | 0                | 0        | 0           | 1                 | 1                          | 1                         | 1                 | 0           | 1                 |
| Patagonian Steppe          | 0        | 1                | 0        | 0           | 1                 | 0                          | 0                         | 1                 | 0           | 1                 |

**Some of the key events in the Neotropics underlying the model for this time period:**

Emergence and expansion of several dry biomes in South America (45, 46) linked to global climatic cooling (47); highest increase in elevation in the Northern and Central Andes (48, 49); onset of the Amazon River (50).

**Time period: 9 to 13 Ma**

|                            | Amazonia | Atlantic Forests | Caatinga | West Indies | Cerrado and Chaco | Dry Northern South America | Dry Western South America | Andean Grasslands | Mesoamerica | Patagonian Steppe |
|----------------------------|----------|------------------|----------|-------------|-------------------|----------------------------|---------------------------|-------------------|-------------|-------------------|
| Amazonia                   | 1        | 0                | 0        | 1           | 0                 | 1                          | 0                         | 0                 | 1           | 1                 |
| Atlantic Forests           | 0        | 1                | 0        | 0           | 0                 | 0                          | 0                         | 0                 | 0           | 1                 |
| Caatinga                   | 0        | 0                | 0        | 0           | 0                 | 0                          | 0                         | 0                 | 0           | 0                 |
| West Indies                | 1        | 0                | 0        | 1           | 0                 | 1                          | 0                         | 0                 | 1           | 0                 |
| Cerrado and Chaco          | 0        | 0                | 0        | 0           | 0                 | 0                          | 0                         | 0                 | 0           | 0                 |
| Dry Northern South America | 1        | 0                | 0        | 1           | 0                 | 1                          | 0                         | 1                 | 0           | 0                 |
| Dry Western South America  | 0        | 0                | 0        | 0           | 0                 | 0                          | 0                         | 0                 | 0           | 0                 |
| Mesoamerica                | 1        | 0                | 0        | 1           | 0                 | 0                          | 0                         | 0                 | 1           | 0                 |
| Andean Grasslands          | 0        | 0                | 0        | 0           | 0                 | 1                          | 0                         | 1                 | 0           | 1                 |
| Patagonian Steppe          | 1        | 1                | 0        | 0           | 0                 | 0                          | 0                         | 1                 | 0           | 1                 |

**Some of the key events in the Neotropics underlying the model for this time period:**

Closure of the Central American Seaway connecting South America and Mesoamerica (51, 52); drainage of the Pebas system in Western Amazonia (48); global climatic cooling (47); development of the Patagonian Steppe (46); moderate uplift of the Andes (48).

**Time period: 13 to 23 Ma**

|                            | Amazonia | Atlantic Forests | Caatinga | West Indies | Cerrado and Chaco | Dry Northern South America | Dry Western South America | Andean Grasslands | Mesoamerica | Patagonian Steppe |
|----------------------------|----------|------------------|----------|-------------|-------------------|----------------------------|---------------------------|-------------------|-------------|-------------------|
| Amazonia                   | 1        | 1                | 0        | 1           | 0                 | 0                          | 0                         | 0                 | 0           | 0                 |
| Atlantic Forests           | 1        | 1                | 0        | 0           | 0                 | 0                          | 0                         | 0                 | 0           | 0                 |
| Caatinga                   | 0        | 0                | 0        | 0           | 0                 | 0                          | 0                         | 0                 | 0           | 0                 |
| West Indies                | 1        | 0                | 0        | 1           | 0                 | 0                          | 0                         | 0                 | 1           | 0                 |
| Cerrado and Chaco          | 0        | 0                | 0        | 0           | 0                 | 0                          | 0                         | 0                 | 0           | 0                 |
| Dry Northern South America | 0        | 0                | 0        | 0           | 0                 | 0                          | 0                         | 0                 | 0           | 0                 |
| Dry Western South America  | 0        | 0                | 0        | 0           | 0                 | 0                          | 0                         | 0                 | 0           | 0                 |
| Mesoamerica                | 0        | 0                | 0        | 1           | 0                 | 0                          | 0                         | 0                 | 1           | 0                 |
| Andean Grasslands          | 0        | 0                | 0        | 0           | 0                 | 0                          | 0                         | 0                 | 0           | 0                 |
| Patagonian Steppe          | 0        | 0                | 0        | 0           | 0                 | 0                          | 0                         | 0                 | 0           | 0                 |

**Some of the key events in the Neotropics underlying the model for this time period:**

Development of wetland conditions in western Amazonia (53, 54); low or absent Andes (48); Panama Arc not yet connected to South America (51).

**Time period: 23 to 33 Ma**

|                            | Amazonia | Atlantic Forests | Caatinga | West Indies | Cerrado and Chaco | Dry Northern South America | Dry Western South America | Andean Grasslands | Mesoamerica | Patagonian Steppe |
|----------------------------|----------|------------------|----------|-------------|-------------------|----------------------------|---------------------------|-------------------|-------------|-------------------|
| Amazonia                   | 1        | 1                | 0        | 0           | 0                 | 0                          | 0                         | 0                 | 0           | 0                 |
| Atlantic Forests           | 1        | 1                | 0        | 0           | 0                 | 0                          | 0                         | 0                 | 0           | 0                 |
| Caatinga                   | 0        | 0                | 0        | 0           | 0                 | 0                          | 0                         | 0                 | 0           | 0                 |
| West Indies                | 0        | 0                | 0        | 1           | 0                 | 0                          | 0                         | 0                 | 1           | 0                 |
| Cerrado and Chaco          | 0        | 0                | 0        | 0           | 0                 | 0                          | 0                         | 0                 | 0           | 0                 |
| Dry Northern South America | 0        | 0                | 0        | 0           | 0                 | 0                          | 0                         | 0                 | 0           | 0                 |
| Dry Western South America  | 0        | 0                | 0        | 0           | 0                 | 0                          | 0                         | 0                 | 0           | 0                 |
| Mesoamerica                | 0        | 0                | 0        | 1           | 0                 | 0                          | 0                         | 0                 | 1           | 0                 |
| Andean Grasslands          | 0        | 0                | 0        | 0           | 0                 | 0                          | 0                         | 0                 | 0           | 0                 |
| Patagonian Steppe          | 0        | 0                | 0        | 0           | 0                 | 0                          | 0                         | 0                 | 0           | 0                 |

**Some of the key events in the Neotropics underlying the model for this time period:**

South America is isolated from other landmasses; relative climatic stability following the Eocene/Oligocene climatic transition (47).

**Time period: 33 to 35 Ma**

|                            | Amazonia | Atlantic Forests | Caatinga | West Indies | Cerrado and Chaco | Dry Northern South America | Dry Western South America | Andean Grasslands | Mesoamerica | Patagonian Steppe |
|----------------------------|----------|------------------|----------|-------------|-------------------|----------------------------|---------------------------|-------------------|-------------|-------------------|
| Amazonia                   | 1        | 1                | 0        | 1           | 0                 | 0                          | 0                         | 0                 | 0           | 0                 |
| Atlantic Forests           | 1        | 1                | 0        | 0           | 0                 | 0                          | 0                         | 0                 | 0           | 0                 |
| Caatinga                   | 0        | 0                | 0        | 0           | 0                 | 0                          | 0                         | 0                 | 0           | 0                 |
| West Indies                | 1        | 0                | 0        | 1           | 0                 | 0                          | 0                         | 0                 | 1           | 0                 |
| Cerrado and Chaco          | 0        | 0                | 0        | 0           | 0                 | 0                          | 0                         | 0                 | 0           | 0                 |
| Dry Northern South America | 0        | 0                | 0        | 0           | 0                 | 0                          | 0                         | 0                 | 0           | 0                 |
| Dry Western South America  | 0        | 0                | 0        | 0           | 0                 | 0                          | 0                         | 0                 | 0           | 0                 |
| Mesoamerica                | 0        | 0                | 0        | 1           | 0                 | 0                          | 0                         | 0                 | 1           | 0                 |
| Andean Grasslands          | 0        | 0                | 0        | 0           | 0                 | 0                          | 0                         | 0                 | 0           | 0                 |
| Patagonian Steppe          | 0        | 0                | 0        | 0           | 0                 | 0                          | 0                         | 0                 | 0           | 0                 |

**Some of the key events in the Neotropics underlying the model for this time period:**

Proposed landbridge between the West Indies and South America (the GAARlandia) (55, 56).

**Time period: 35 to 66 Ma**

|                            | Amazonia | Atlantic Forests | Caatinga | West Indies | Cerrado and Chaco | Dry Northern South America | Dry Western South America | Andean Grasslands | Mesoamerica | Patagonian Steppe |
|----------------------------|----------|------------------|----------|-------------|-------------------|----------------------------|---------------------------|-------------------|-------------|-------------------|
| Amazonia                   | 1        | 1                | 0        | 0           | 0                 | 0                          | 0                         | 0                 | 0           | 0                 |
| Atlantic Forests           | 1        | 1                | 0        | 0           | 0                 | 0                          | 0                         | 0                 | 0           | 0                 |
| Caatinga                   | 0        | 0                | 0        | 0           | 0                 | 0                          | 0                         | 0                 | 0           | 0                 |
| West Indies                | 0        | 0                | 0        | 1           | 0                 | 0                          | 0                         | 0                 | 0           | 0                 |
| Cerrado and Chaco          | 0        | 0                | 0        | 0           | 0                 | 0                          | 0                         | 0                 | 0           | 0                 |
| Dry Northern South America | 0        | 0                | 0        | 0           | 0                 | 0                          | 0                         | 0                 | 0           | 0                 |
| Dry Western South America  | 0        | 0                | 0        | 0           | 0                 | 0                          | 0                         | 0                 | 0           | 0                 |
| Mesoamerica                | 0        | 0                | 0        | 0           | 0                 | 0                          | 0                         | 0                 | 1           | 0                 |
| Andean Grasslands          | 0        | 0                | 0        | 0           | 0                 | 0                          | 0                         | 0                 | 0           | 0                 |
| Patagonian Steppe          | 0        | 0                | 0        | 0           | 0                 | 0                          | 0                         | 0                 | 0           | 0                 |

**Some of the key events in the Neotropics underlying the model for this time period:**

Pan-Amazonia dominated large parts of northern South America (48). No evidence of several current biomes.



**Table S4.** Number of dispersal events per region and clade, sorted by decreasing order of total number of events.

| Region                     | Direction | Angiosperms | Birds | Ferns | Frogs | Mammals | Squamates | Total |
|----------------------------|-----------|-------------|-------|-------|-------|---------|-----------|-------|
| Amazonia                   | From      | 1506        | 850   | 58    | 33    | 248     | 160       | 2855  |
| Mesoamerica                | From      | 377         | 179   | 7     | 0     | 32      | 20        | 615   |
| Cerrado and Chaco          | From      | 177         | 106   | 1     | 23    | 73      | 75        | 455   |
| Atlantic Forests           | From      | 195         | 40    | 14    | 7     | 3       | 37        | 296   |
| Andean Grasslands          | From      | 18          | 40    | 0     | 1     | 29      | 17        | 105   |
| Patagonian Steppe          | From      | 28          | 33    | 0     | 1     | 10      | 9         | 81    |
| West Indies                | From      | 47          | 3     | 0     | 0     | 0       | 15        | 65    |
| Dry Northern South America | From      | 13          | 7     | 0     | 0     | 4       | 7         | 31    |
| Caatinga                   | From      | 11          | 0     | 0     | 0     | 1       | 0         | 12    |
| Dry Western South America  | From      | 1           | 4     | 0     | 0     | 3       | 2         | 10    |
| Mesoamerica                | To        | 471         | 192   | 26    | 4     | 72      | 23        | 788   |
| Dry Northern South America | To        | 338         | 277   | 2     | 3     | 102     | 49        | 771   |
| Cerrado and Chaco          | To        | 399         | 235   | 13    | 9     | 55      | 55        | 766   |
| Atlantic Forests           | To        | 375         | 183   | 11    | 12    | 24      | 56        | 661   |
| Amazonia                   | To        | 255         | 125   | 7     | 10    | 56      | 41        | 494   |
| Andean Grasslands          | To        | 122         | 89    | 5     | 11    | 38      | 33        | 298   |
| Patagonian Steppe          | To        | 64          | 57    | 0     | 9     | 31      | 49        | 210   |
| West Indies                | To        | 145         | 30    | 12    | 1     | 8       | 5         | 201   |
| Caatinga                   | To        | 171         | 2     | 4     | 4     | 1       | 17        | 199   |
| Dry Western South America  | To        | 33          | 72    | 0     | 2     | 16      | 14        | 137   |

**Table S5.** Number of dispersal events per region and clade, sorted by **sink area** and in decreasing order of total number of events.

| To                         | From                       | Angiosperms | Birds      | Ferns     | Frogs     | Mammals   | Squamates | Total      |
|----------------------------|----------------------------|-------------|------------|-----------|-----------|-----------|-----------|------------|
| Amazonia                   | Mesoamerica                | 157         | 89         | 3         | 0         | 14        | 13        | 276        |
| Amazonia                   | Cerrado and Chaco          | 30          | 15         | 0         | 7         | 23        | 15        | 90         |
| Amazonia                   | Atlantic Forests           | 36          | 3          | 4         | 2         | 1         | 4         | 50         |
| Amazonia                   | Andean Grasslands          | 10          | 10         | 0         | 1         | 12        | 3         | 36         |
| Amazonia                   | West Indies                | 13          | 1          | 0         | 0         | 0         | 6         | 20         |
| Amazonia                   | Patagonian Steppe          | 5           | 5          | 0         | 0         | 1         | 0         | 11         |
| Amazonia                   | Dry Northern South America | 2           | 2          | 0         | 0         | 3         | 0         | 7          |
| Amazonia                   | Caatinga                   | 2           | 0          | 0         | 0         | 0         | 0         | 2          |
| Amazonia                   | Dry Western South America  | 0           | 0          | 0         | 0         | 2         | 0         | 2          |
| <b>Amazonia</b>            | <b>All above</b>           | <b>255</b>  | <b>125</b> | <b>7</b>  | <b>10</b> | <b>56</b> | <b>41</b> | <b>494</b> |
| Andean Grasslands          | Amazonia                   | 100         | 71         | 5         | 7         | 25        | 14        | 222        |
| Andean Grasslands          | Cerrado and Chaco          | 6           | 9          | 0         | 3         | 9         | 7         | 34         |
| Andean Grasslands          | Patagonian Steppe          | 7           | 5          | 0         | 1         | 3         | 5         | 21         |
| Andean Grasslands          | Mesoamerica                | 7           | 3          | 0         | 0         | 1         | 0         | 11         |
| Andean Grasslands          | Atlantic Forests           | 0           | 1          | 0         | 0         | 0         | 3         | 4          |
| Andean Grasslands          | Dry Northern South America | 1           | 0          | 0         | 0         | 0         | 2         | 3          |
| Andean Grasslands          | Dry Western South America  | 0           | 0          | 0         | 0         | 0         | 2         | 2          |
| Andean Grasslands          | West Indies                | 1           | 0          | 0         | 0         | 0         | 0         | 1          |
| Andean Grasslands          | Caatinga                   | 0           | 0          | 0         | 0         | 0         | 0         | 0          |
| <b>Andean Grasslands</b>   | <b>All above</b>           | <b>122</b>  | <b>89</b>  | <b>5</b>  | <b>11</b> | <b>38</b> | <b>33</b> | <b>298</b> |
| Atlantic Forests           | Amazonia                   | 265         | 118        | 9         | 6         | 12        | 31        | 441        |
| Atlantic Forests           | Cerrado and Chaco          | 54          | 42         | 1         | 6         | 10        | 22        | 135        |
| Atlantic Forests           | Mesoamerica                | 45          | 12         | 1         | 0         | 2         | 1         | 61         |
| Atlantic Forests           | Patagonian Steppe          | 4           | 8          | 0         | 0         | 0         | 0         | 12         |
| Atlantic Forests           | Dry Northern South America | 2           | 0          | 0         | 0         | 0         | 2         | 4          |
| Atlantic Forests           | West Indies                | 3           | 0          | 0         | 0         | 0         | 0         | 3          |
| Atlantic Forests           | Andean Grasslands          | 0           | 3          | 0         | 0         | 0         | 0         | 3          |
| Atlantic Forests           | Caatinga                   | 2           | 0          | 0         | 0         | 0         | 0         | 2          |
| Atlantic Forests           | Dry Western South America  | 0           | 0          | 0         | 0         | 0         | 0         | 0          |
| <b>Atlantic Forests</b>    | <b>All above</b>           | <b>375</b>  | <b>183</b> | <b>11</b> | <b>12</b> | <b>24</b> | <b>56</b> | <b>661</b> |
| Caatinga                   | Amazonia                   | 73          | 1          | 3         | 2         | 1         | 5         | 85         |
| Caatinga                   | Atlantic Forests           | 47          | 1          | 1         | 1         | 0         | 3         | 53         |
| Caatinga                   | Cerrado and Chaco          | 29          | 0          | 0         | 1         | 0         | 7         | 37         |
| Caatinga                   | Mesoamerica                | 18          | 0          | 0         | 0         | 0         | 0         | 18         |
| Caatinga                   | West Indies                | 2           | 0          | 0         | 0         | 0         | 0         | 2          |
| Caatinga                   | Dry Northern South America | 2           | 0          | 0         | 0         | 0         | 0         | 2          |
| Caatinga                   | Andean Grasslands          | 0           | 0          | 0         | 0         | 0         | 1         | 1          |
| Caatinga                   | Patagonian Steppe          | 0           | 0          | 0         | 0         | 0         | 1         | 1          |
| Caatinga                   | Dry Western South America  | 0           | 0          | 0         | 0         | 0         | 0         | 0          |
| <b>Caatinga</b>            | <b>All above</b>           | <b>171</b>  | <b>2</b>   | <b>4</b>  | <b>4</b>  | <b>1</b>  | <b>17</b> | <b>199</b> |
| Cerrado and Chaco          | Amazonia                   | 262         | 170        | 9         | 6         | 41        | 29        | 517        |
| Cerrado and Chaco          | Atlantic Forests           | 72          | 22         | 3         | 3         | 1         | 18        | 119        |
| Cerrado and Chaco          | Mesoamerica                | 41          | 18         | 1         | 0         | 3         | 0         | 63         |
| Cerrado and Chaco          | Patagonian Steppe          | 7           | 15         | 0         | 0         | 2         | 3         | 27         |
| Cerrado and Chaco          | Andean Grasslands          | 4           | 7          | 0         | 0         | 8         | 4         | 23         |
| Cerrado and Chaco          | West Indies                | 8           | 1          | 0         | 0         | 0         | 0         | 9          |
| Cerrado and Chaco          | Dry Northern South America | 2           | 1          | 0         | 0         | 0         | 1         | 4          |
| Cerrado and Chaco          | Caatinga                   | 3           | 0          | 0         | 0         | 0         | 0         | 3          |
| Cerrado and Chaco          | Dry Western South America  | 0           | 1          | 0         | 0         | 0         | 0         | 1          |
| <b>Cerrado and Chaco</b>   | <b>All above</b>           | <b>399</b>  | <b>235</b> | <b>13</b> | <b>9</b>  | <b>55</b> | <b>55</b> | <b>766</b> |
| Dry Northern South America | Amazonia                   | 275         | 225        | 2         | 3         | 82        | 35        | 622        |
| Dry Northern South America | Mesoamerica                | 45          | 31         | 0         | 0         | 7         | 5         | 88         |
| Dry Northern South America | Cerrado and Chaco          | 5           | 15         | 0         | 0         | 10        | 2         | 32         |
| Dry Northern South America | Atlantic Forests           | 5           | 4          | 0         | 0         | 0         | 2         | 11         |
| Dry Northern South America | West Indies                | 6           | 0          | 0         | 0         | 0         | 5         | 11         |
| Dry Northern South America | Andean Grasslands          | 1           | 1          | 0         | 0         | 1         | 0         | 3          |
| Dry Northern South America | Patagonian Steppe          | 1           | 0          | 0         | 0         | 2         | 0         | 3          |
| Dry Northern South America | Dry Western South America  | 0           | 1          | 0         | 0         | 0         | 0         | 1          |
| Dry Northern South America | Caatinga                   | 0           | 0          | 0         | 0         | 0         | 0         | 0          |

|                                   |                            |            |            |           |          |            |           |            |
|-----------------------------------|----------------------------|------------|------------|-----------|----------|------------|-----------|------------|
| <b>Dry Northern South America</b> | <b>All above</b>           | <b>338</b> | <b>277</b> | <b>2</b>  | <b>3</b> | <b>102</b> | <b>49</b> | <b>771</b> |
| Dry Western South America         | Amazonia                   | 26         | 44         | 0         | 2        | 10         | 13        | 95         |
| Dry Western South America         | Andean Grasslands          | 2          | 12         | 0         | 0        | 4          | 1         | 19         |
| Dry Western South America         | Mesoamerica                | 4          | 13         | 0         | 0        | 1          | 0         | 18         |
| Dry Western South America         | Cerrado and Chaco          | 0          | 2          | 0         | 0        | 0          | 0         | 2          |
| Dry Western South America         | Patagonian Steppe          | 1          | 0          | 0         | 0        | 1          | 0         | 2          |
| Dry Western South America         | Dry Northern South America | 0          | 1          | 0         | 0        | 0          | 0         | 1          |
| Dry Western South America         | Atlantic Forests           | 0          | 0          | 0         | 0        | 0          | 0         | 0          |
| Dry Western South America         | Caatinga                   | 0          | 0          | 0         | 0        | 0          | 0         | 0          |
| Dry Western South America         | West Indies                | 0          | 0          | 0         | 0        | 0          | 0         | 0          |
| <b>Dry Western South America</b>  | <b>All above</b>           | <b>33</b>  | <b>72</b>  | <b>0</b>  | <b>2</b> | <b>16</b>  | <b>14</b> | <b>137</b> |
| Mesoamerica                       | Amazonia                   | 420        | 182        | 22        | 4        | 66         | 17        | 711        |
| Mesoamerica                       | Cerrado and Chaco          | 18         | 5          | 0         | 0        | 4          | 0         | 27         |
| Mesoamerica                       | Atlantic Forests           | 15         | 1          | 4         | 0        | 0          | 1         | 21         |
| Mesoamerica                       | West Indies                | 13         | 1          | 0         | 0        | 0          | 4         | 18         |
| Mesoamerica                       | Patagonian Steppe          | 3          | 0          | 0         | 0        | 1          | 0         | 4          |
| Mesoamerica                       | Caatinga                   | 1          | 0          | 0         | 0        | 1          | 0         | 2          |
| Mesoamerica                       | Dry Northern South America | 1          | 0          | 0         | 0        | 0          | 1         | 2          |
| Mesoamerica                       | Dry Western South America  | 0          | 2          | 0         | 0        | 0          | 0         | 2          |
| Mesoamerica                       | Andean Grasslands          | 0          | 1          | 0         | 0        | 0          | 0         | 1          |
| <b>Mesoamerica</b>                | <b>All above</b>           | <b>471</b> | <b>192</b> | <b>26</b> | <b>4</b> | <b>72</b>  | <b>23</b> | <b>788</b> |
| Patagonian Steppe                 | Cerrado and Chaco          | 26         | 16         | 0         | 6        | 17         | 22        | 87         |
| Patagonian Steppe                 | Amazonia                   | 18         | 27         | 0         | 2        | 7          | 12        | 66         |
| Patagonian Steppe                 | Atlantic Forests           | 10         | 8          | 0         | 1        | 1          | 6         | 26         |
| Patagonian Steppe                 | Andean Grasslands          | 1          | 6          | 0         | 0        | 4          | 8         | 19         |
| Patagonian Steppe                 | Mesoamerica                | 5          | 0          | 0         | 0        | 1          | 0         | 6          |
| Patagonian Steppe                 | Dry Northern South America | 1          | 0          | 0         | 0        | 0          | 1         | 2          |
| Patagonian Steppe                 | Dry Western South America  | 1          | 0          | 0         | 0        | 1          | 0         | 2          |
| Patagonian Steppe                 | Caatinga                   | 1          | 0          | 0         | 0        | 0          | 0         | 1          |
| Patagonian Steppe                 | West Indies                | 1          | 0          | 0         | 0        | 0          | 0         | 1          |
| <b>Patagonian Steppe</b>          | <b>All above</b>           | <b>64</b>  | <b>57</b>  | <b>0</b>  | <b>9</b> | <b>31</b>  | <b>49</b> | <b>210</b> |
| West Indies                       | Amazonia                   | 67         | 12         | 8         | 1        | 4          | 4         | 96         |
| West Indies                       | Mesoamerica                | 55         | 13         | 2         | 0        | 3          | 1         | 74         |
| West Indies                       | Atlantic Forests           | 10         | 0          | 2         | 0        | 0          | 0         | 12         |
| West Indies                       | Cerrado and Chaco          | 9          | 2          | 0         | 0        | 0          | 0         | 11         |
| West Indies                       | Dry Northern South America | 2          | 3          | 0         | 0        | 1          | 0         | 6          |
| West Indies                       | Caatinga                   | 2          | 0          | 0         | 0        | 0          | 0         | 2          |
| West Indies                       | Dry Western South America  | 0          | 0          | 0         | 0        | 0          | 0         | 0          |
| West Indies                       | Andean Grasslands          | 0          | 0          | 0         | 0        | 0          | 0         | 0          |
| West Indies                       | Patagonian Steppe          | 0          | 0          | 0         | 0        | 0          | 0         | 0          |
| <b>West Indies</b>                | <b>All above</b>           | <b>145</b> | <b>30</b>  | <b>12</b> | <b>1</b> | <b>8</b>   | <b>5</b>  | <b>201</b> |

**Table S6.** Number of dispersal events per region and clade, sorted by **source area** and in decreasing order of total number of events. "Shift" refers to the probable sort of transition, as shown in Fig. 1: R (region-only), B (region and biome type), and A (ambiguous).

| From                              | To                         | Shift | Angiosperms | Birds      | Ferns     | Frogs     | Mammals    | Squamates  | Total       |
|-----------------------------------|----------------------------|-------|-------------|------------|-----------|-----------|------------|------------|-------------|
| Amazonia                          | Mesoamerica                | A     | 420         | 182        | 22        | 4         | 66         | 17         | 711         |
| Amazonia                          | Dry Northern South America | B     | 275         | 225        | 2         | 3         | 82         | 35         | 622         |
| Amazonia                          | Cerrado and Chaco          | B     | 262         | 170        | 9         | 6         | 41         | 29         | 517         |
| Amazonia                          | Atlantic Forests           | A     | 265         | 118        | 9         | 6         | 12         | 31         | 441         |
| Amazonia                          | Andean Grasslands          | B     | 100         | 71         | 5         | 7         | 25         | 14         | 222         |
| Amazonia                          | West Indies                | A     | 67          | 12         | 8         | 1         | 4          | 4          | 96          |
| Amazonia                          | Dry Western South America  | B     | 26          | 44         | 0         | 2         | 10         | 13         | 95          |
| Amazonia                          | Caatinga                   | B     | 73          | 1          | 3         | 2         | 1          | 5          | 85          |
| Amazonia                          | Patagonian Steppe          | B     | 18          | 27         | 0         | 2         | 7          | 12         | 66          |
| <b>Amazonia</b>                   | <b>All above</b>           |       | <b>1506</b> | <b>850</b> | <b>58</b> | <b>33</b> | <b>248</b> | <b>160</b> | <b>2855</b> |
| Andean Grasslands                 | Amazonia                   | B     | 10          | 10         | 0         | 1         | 12         | 3          | 36          |
| Andean Grasslands                 | Cerrado and Chaco          | R     | 4           | 7          | 0         | 0         | 8          | 4          | 23          |
| Andean Grasslands                 | Dry Western South America  | R     | 2           | 12         | 0         | 0         | 4          | 1          | 19          |
| Andean Grasslands                 | Patagonian Steppe          | R     | 1           | 6          | 0         | 0         | 4          | 8          | 19          |
| Andean Grasslands                 | Atlantic Forests           | B     | 0           | 3          | 0         | 0         | 0          | 0          | 3           |
| Andean Grasslands                 | Dry Northern South America | R     | 1           | 1          | 0         | 0         | 1          | 0          | 3           |
| Andean Grasslands                 | Caatinga                   | R     | 0           | 0          | 0         | 0         | 0          | 1          | 1           |
| Andean Grasslands                 | Mesoamerica                | A     | 0           | 1          | 0         | 0         | 0          | 0          | 1           |
| Andean Grasslands                 | West Indies                | A     | 0           | 0          | 0         | 0         | 0          | 0          | 0           |
| <b>Andean Grasslands</b>          | <b>All above</b>           |       | <b>18</b>   | <b>40</b>  | <b>0</b>  | <b>1</b>  | <b>29</b>  | <b>17</b>  | <b>105</b>  |
| Atlantic Forests                  | Cerrado and Chaco          | B     | 72          | 22         | 3         | 3         | 1          | 18         | 119         |
| Atlantic Forests                  | Caatinga                   | B     | 47          | 1          | 1         | 1         | 0          | 3          | 53          |
| Atlantic Forests                  | Amazonia                   | A     | 36          | 3          | 4         | 2         | 1          | 4          | 50          |
| Atlantic Forests                  | Patagonian Steppe          | B     | 10          | 8          | 0         | 1         | 1          | 6          | 26          |
| Atlantic Forests                  | Mesoamerica                | A     | 15          | 1          | 4         | 0         | 0          | 1          | 21          |
| Atlantic Forests                  | West Indies                | A     | 10          | 0          | 2         | 0         | 0          | 0          | 12          |
| Atlantic Forests                  | Dry Northern South America | B     | 5           | 4          | 0         | 0         | 0          | 2          | 11          |
| Atlantic Forests                  | Andean Grasslands          | B     | 0           | 1          | 0         | 0         | 0          | 3          | 4           |
| Atlantic Forests                  | Dry Western South America  | B     | 0           | 0          | 0         | 0         | 0          | 0          | 0           |
| <b>Atlantic Forests</b>           | <b>All above</b>           |       | <b>195</b>  | <b>40</b>  | <b>14</b> | <b>7</b>  | <b>3</b>   | <b>37</b>  | <b>296</b>  |
| Caatinga                          | Cerrado and Chaco          | R     | 3           | 0          | 0         | 0         | 0          | 0          | 3           |
| Caatinga                          | Amazonia                   | B     | 2           | 0          | 0         | 0         | 0          | 0          | 2           |
| Caatinga                          | Atlantic Forests           | B     | 2           | 0          | 0         | 0         | 0          | 0          | 2           |
| Caatinga                          | West Indies                | A     | 2           | 0          | 0         | 0         | 0          | 0          | 2           |
| Caatinga                          | Mesoamerica                | A     | 1           | 0          | 0         | 0         | 1          | 0          | 2           |
| Caatinga                          | Patagonian Steppe          | R     | 1           | 0          | 0         | 0         | 0          | 0          | 1           |
| Caatinga                          | Dry Northern South America | R     | 0           | 0          | 0         | 0         | 0          | 0          | 0           |
| Caatinga                          | Dry Western South America  | R     | 0           | 0          | 0         | 0         | 0          | 0          | 0           |
| Caatinga                          | Andean Grasslands          | R     | 0           | 0          | 0         | 0         | 0          | 0          | 0           |
| <b>Caatinga</b>                   | <b>All above</b>           |       | <b>11</b>   | <b>0</b>   | <b>0</b>  | <b>0</b>  | <b>1</b>   | <b>0</b>   | <b>12</b>   |
| Cerrado and Chaco                 | Atlantic Forests           | B     | 54          | 42         | 1         | 6         | 10         | 22         | 135         |
| Cerrado and Chaco                 | Amazonia                   | B     | 30          | 15         | 0         | 7         | 23         | 15         | 90          |
| Cerrado and Chaco                 | Patagonian Steppe          | R     | 26          | 16         | 0         | 6         | 17         | 22         | 87          |
| Cerrado and Chaco                 | Caatinga                   | R     | 29          | 0          | 0         | 1         | 0          | 7          | 37          |
| Cerrado and Chaco                 | Andean Grasslands          | R     | 6           | 9          | 0         | 3         | 9          | 7          | 34          |
| Cerrado and Chaco                 | Dry Northern South America | R     | 5           | 15         | 0         | 0         | 10         | 2          | 32          |
| Cerrado and Chaco                 | Mesoamerica                | A     | 18          | 5          | 0         | 0         | 4          | 0          | 27          |
| Cerrado and Chaco                 | West Indies                | A     | 9           | 2          | 0         | 0         | 0          | 0          | 11          |
| Cerrado and Chaco                 | Dry Western South America  | R     | 0           | 2          | 0         | 0         | 0          | 0          | 2           |
| <b>Cerrado and Chaco</b>          | <b>All above</b>           |       | <b>177</b>  | <b>106</b> | <b>1</b>  | <b>23</b> | <b>73</b>  | <b>75</b>  | <b>455</b>  |
| Dry Northern South America        | Amazonia                   | B     | 2           | 2          | 0         | 0         | 3          | 0          | 7           |
| Dry Northern South America        | West Indies                | A     | 2           | 3          | 0         | 0         | 1          | 0          | 6           |
| Dry Northern South America        | Atlantic Forests           | B     | 2           | 0          | 0         | 0         | 0          | 2          | 4           |
| Dry Northern South America        | Cerrado and Chaco          | R     | 2           | 1          | 0         | 0         | 0          | 1          | 4           |
| Dry Northern South America        | Andean Grasslands          | R     | 1           | 0          | 0         | 0         | 0          | 2          | 3           |
| Dry Northern South America        | Caatinga                   | R     | 2           | 0          | 0         | 0         | 0          | 0          | 2           |
| Dry Northern South America        | Mesoamerica                | A     | 1           | 0          | 0         | 0         | 0          | 1          | 2           |
| Dry Northern South America        | Patagonian Steppe          | R     | 1           | 0          | 0         | 0         | 0          | 1          | 2           |
| Dry Northern South America        | Dry Western South America  | R     | 0           | 1          | 0         | 0         | 0          | 0          | 1           |
| <b>Dry Northern South America</b> | <b>All above</b>           |       | <b>13</b>   | <b>7</b>   | <b>0</b>  | <b>0</b>  | <b>4</b>   | <b>7</b>   | <b>31</b>   |
| Dry Western South America         | Amazonia                   | B     | 0           | 0          | 0         | 0         | 2          | 0          | 2           |
| Dry Western South America         | Mesoamerica                | A     | 0           | 2          | 0         | 0         | 0          | 0          | 2           |
| Dry Western South America         | Andean Grasslands          | R     | 0           | 0          | 0         | 0         | 0          | 2          | 2           |
| Dry Western South America         | Patagonian Steppe          | R     | 1           | 0          | 0         | 0         | 1          | 0          | 2           |
| Dry Western South America         | Cerrado and Chaco          | R     | 0           | 1          | 0         | 0         | 0          | 0          | 1           |
| Dry Western South America         | Dry Northern South America | R     | 0           | 1          | 0         | 0         | 0          | 0          | 1           |
| Dry Western South America         | Atlantic Forests           | B     | 0           | 0          | 0         | 0         | 0          | 0          | 0           |

|                                  |                            |   |            |            |          |          |           |           |            |
|----------------------------------|----------------------------|---|------------|------------|----------|----------|-----------|-----------|------------|
| Dry Western South America        | Caatinga                   | R | 0          | 0          | 0        | 0        | 0         | 0         | 0          |
| Dry Western South America        | West Indies                | A | 0          | 0          | 0        | 0        | 0         | 0         | 0          |
| <b>Dry Western South America</b> | <b>All above</b>           |   | <b>1</b>   | <b>4</b>   | <b>0</b> | <b>0</b> | <b>3</b>  | <b>2</b>  | <b>10</b>  |
| Mesoamerica                      | Amazonia                   | A | 157        | 89         | 3        | 0        | 14        | 13        | 276        |
| Mesoamerica                      | Dry Northern South America | A | 45         | 31         | 0        | 0        | 7         | 5         | 88         |
| Mesoamerica                      | West Indies                | A | 55         | 13         | 2        | 0        | 3         | 1         | 74         |
| Mesoamerica                      | Cerrado and Chaco          | A | 41         | 18         | 1        | 0        | 3         | 0         | 63         |
| Mesoamerica                      | Atlantic Forests           | A | 45         | 12         | 1        | 0        | 2         | 1         | 61         |
| Mesoamerica                      | Caatinga                   | A | 18         | 0          | 0        | 0        | 0         | 0         | 18         |
| Mesoamerica                      | Dry Western South America  | A | 4          | 13         | 0        | 0        | 1         | 0         | 18         |
| Mesoamerica                      | Andean Grasslands          | A | 7          | 3          | 0        | 0        | 1         | 0         | 11         |
| Mesoamerica                      | Patagonian Steppe          | A | 5          | 0          | 0        | 0        | 1         | 0         | 6          |
| <b>Mesoamerica</b>               | <b>All above</b>           |   | <b>377</b> | <b>179</b> | <b>7</b> | <b>0</b> | <b>32</b> | <b>20</b> | <b>615</b> |
| Patagonian Steppe                | Cerrado and Chaco          | R | 7          | 15         | 0        | 0        | 2         | 3         | 27         |
| Patagonian Steppe                | Andean Grasslands          | R | 7          | 5          | 0        | 1        | 3         | 5         | 21         |
| Patagonian Steppe                | Atlantic Forests           | B | 4          | 8          | 0        | 0        | 0         | 0         | 12         |
| Patagonian Steppe                | Amazonia                   | B | 5          | 5          | 0        | 0        | 1         | 0         | 11         |
| Patagonian Steppe                | Mesoamerica                | A | 3          | 0          | 0        | 0        | 1         | 0         | 4          |
| Patagonian Steppe                | Dry Northern South America | R | 1          | 0          | 0        | 0        | 2         | 0         | 3          |
| Patagonian Steppe                | Dry Western South America  | R | 1          | 0          | 0        | 0        | 1         | 0         | 2          |
| Patagonian Steppe                | Caatinga                   | R | 0          | 0          | 0        | 0        | 0         | 1         | 1          |
| Patagonian Steppe                | West Indies                | A | 0          | 0          | 0        | 0        | 0         | 0         | 0          |
| <b>Patagonian Steppe</b>         | <b>All above</b>           |   | <b>28</b>  | <b>33</b>  | <b>0</b> | <b>1</b> | <b>10</b> | <b>9</b>  | <b>81</b>  |
| West Indies                      | Amazonia                   | A | 13         | 1          | 0        | 0        | 0         | 6         | 20         |
| West Indies                      | Mesoamerica                | A | 13         | 1          | 0        | 0        | 0         | 4         | 18         |
| West Indies                      | Dry Northern South America | A | 6          | 0          | 0        | 0        | 0         | 5         | 11         |
| West Indies                      | Cerrado and Chaco          | A | 8          | 1          | 0        | 0        | 0         | 0         | 9          |
| West Indies                      | Atlantic Forests           | A | 3          | 0          | 0        | 0        | 0         | 0         | 3          |
| West Indies                      | Caatinga                   | A | 2          | 0          | 0        | 0        | 0         | 0         | 2          |
| West Indies                      | Andean Grasslands          | A | 1          | 0          | 0        | 0        | 0         | 0         | 1          |
| West Indies                      | Patagonian Steppe          | A | 1          | 0          | 0        | 0        | 0         | 0         | 1          |
| West Indies                      | Dry Western South America  | A | 0          | 0          | 0        | 0        | 0         | 0         | 0          |
| <b>West Indies</b>               | <b>All above</b>           |   | <b>47</b>  | <b>3</b>   | <b>0</b> | <b>0</b> | <b>0</b>  | <b>15</b> | <b>65</b>  |

**Table S7.** Residuals from the multiple predictor analysis on the effect of dispersal events, for each of the clades and regions included in the model.

| Model | Direction   | Taxon       | Amazonia | Andean Grasslands | Atlantic Forests | Caatinga | Cerrado and Chaco | Dry Northern South America | Dry Western South America | Mesoamerica | Patagonian Steppe | West Indies |
|-------|-------------|-------------|----------|-------------------|------------------|----------|-------------------|----------------------------|---------------------------|-------------|-------------------|-------------|
| LME1  | Emmigration | Angiosperms | 0.25     | -0.1              | 0.97             | -0.5     | -0.08             | -0.98                      | -1.18                     | 0.78        | 0.44              | 1.1         |
| LME1  | Emmigration | Birds       | 0.12     | 0.75              | -0.01            | 0.37     | -0.3              | -1.24                      | -0.46                     | 0.57        | 0.68              | -0.25       |
| LME1  | Emmigration | Birds       | -0.03    | 0.98              | -1.31            | 0.72     | 0.09              | -1.32                      | 0.92                      | -0.13       | 0.1               | -0.23       |
| LME1  | Emmigration | Squamates   | -0.54    | 0.42              | 0.66             | -1.25    | 0.01              | -0.05                      | 0.12                      | -0.33       | 0.1               | 0.15        |
| LME2  | Immigration | Angiosperms | -0.92    | 0.09              | 0.22             | 0.38     | 0.48              | 0.74                       | -0.45                     | 0.65        | -0.45             | -0.06       |
| LME2  | Immigration | Birds       | -0.95    | 0.06              | 0.31             | -0.72    | 0.47              | 1.12                       | -0.08                     | 0.48        | -0.29             | -0.09       |
| LME2  | Immigration | Mammals     | -0.5     | -0.05             | -0.28            | -0.86    | -0.04             | 0.81                       | 0.23                      | 0.7         | -0.09             | -0.13       |
| LME2  | Immigration | Squamates   | -0.67    | 0.02              | 0.3              | 0.34     | 0.1               | 0.98                       | -0.04                     | 0.04        | 0.72              | -2.59       |

**Table S8.** Descriptive statistics of the multiple predictor model on the effect of dispersal events.

| Model | Direction    | Taxa                                      | Predictor                        | Coefficient mean | Coefficient 2.5% | Coefficient .97.5% | Importance |
|-------|--------------|-------------------------------------------|----------------------------------|------------------|------------------|--------------------|------------|
| LME1  | Emmigrations | Angiosperms + Birds + Mammals + Squamates | Area                             | 0.738            | 0.38             | 1.093              | *          |
| LME1  | Emmigrations | Angiosperms + Birds + Mammals + Squamates | Branch length                    | 1.044            | 0.509            | 1.54               | *          |
| LME1  | Emmigrations | Angiosperms + Birds + Mammals + Squamates | Fraction of species in Phylogeny | 0.249            | -0.415           | 1.142              |            |
| LME1  | Emmigrations | Angiosperms + Birds + Mammals + Squamates | Geographic Isolation             | -0.015           | -0.328           | 0.298              |            |
| LME1  | Emmigrations | Angiosperms + Birds + Mammals + Squamates | Perimeter                        | 0.156            | -0.292           | 0.601              |            |
| LME2  | Immigrations | Angiosperms + Birds + Mammals + Squamates | Area                             | -0.103           | -0.458           | 0.25               |            |
| LME2  | Immigrations | Angiosperms + Birds + Mammals + Squamates | Branch length                    | 1.012            | 0.461            | 1.527              | *          |
| LME2  | Immigrations | Angiosperms + Birds + Mammals + Squamates | Fraction of species in Phylogeny | 0.197            | -0.536           | 1.139              |            |
| LME2  | Immigrations | Angiosperms + Birds + Mammals + Squamates | Geographic Isolation             | -0.335           | -0.646           | -0.026             | *          |
| LME2  | Immigrations | Angiosperms + Birds + Mammals + Squamates | Perimeter                        | -0.155           | -0.603           | 0.288              |            |

**Table S9.** Statistics on the data gathered for all taxa analyzed and their sampling in the phylogenies.

| <b>Taxon</b> | <b>Number of occurrences in Neotropics</b> | <b>Number of species in Neotropics</b> | <b>Species in the phylogeny</b> | <b>Species in phylogeny with occurrence in the Neotropics</b> | <b>Number of monophyletic clades</b> | <b>Mean tip number per clade</b> | <b>Number of species sampled in all monophyletic clades</b> |
|--------------|--------------------------------------------|----------------------------------------|---------------------------------|---------------------------------------------------------------|--------------------------------------|----------------------------------|-------------------------------------------------------------|
| Angiosperms  | 992236                                     | 60031                                  | 30535                           | 6202                                                          | 104                                  | 20                               | 2114(4%)                                                    |
| Frogs        | 42830                                      | 880                                    | 3126                            | 431                                                           | 11                                   | 14                               | 155(18%)                                                    |
| Birds        | 55565                                      | 2622                                   | 9993                            | 2443                                                          | 54                                   | 23                               | 1237(47%)                                                   |
| Ferns        | 45923                                      | 2595                                   | 1118                            | 250                                                           | 4                                    | 13                               | 53(2%)                                                      |
| Mammals      | 131491                                     | 1025                                   | 5020                            | 884                                                           | 13                                   | 28                               | 359(35%)                                                    |
| Squamates    | 63278                                      | 1176                                   | 4162                            | 590                                                           | 28                                   | 19                               | 532(45%)                                                    |
| <b>Total</b> | <b>1331323</b>                             | <b>68329</b>                           | <b>53954</b>                    | <b>10800</b>                                                  | <b>214</b>                           | <b>-</b>                         | <b>4450(7%)</b>                                             |



Table\_S10. Pearsons correlation of predictor variables for the multivariate regression model on number of shifts per region.

|                        | <b>Area</b> | <b>Geographic isolation</b> | <b>Perimeter</b> | <b>Phylogenetic sampling</b> | <b>No. occurrence records</b> | <b>Total branch length</b> |
|------------------------|-------------|-----------------------------|------------------|------------------------------|-------------------------------|----------------------------|
| Area                   | 1           | -0,47                       | 0,68             | 0,11                         | 0,37                          | 0,53                       |
| Geographic isolation   | -0,47       | 1                           | -0,44            | 0,03                         | 0,09                          | -0,07                      |
| Perimeter              | 0,68        | -0,44                       | 1                | 0,14                         | 0,5                           | 0,68                       |
| Phylogenetic sampling  | 0,11        | 0,03                        | 0,14             | 1                            | -0,38                         | 0,01                       |
| No. occurrence records | 0,37        | 0,09                        | 0,5              | -0,38                        | 1                             | <b>0,8</b>                 |
| Total branch length    | 0,53        | -0,07                       | 0,68             | 0,01                         | <b>0,8</b>                    | 1                          |

## Supporting References

1. GBIF.org (22nd January 2016) GBIF Occurrence Download. Mammalia Linnaeus, 1758. doi:<http://doi.org/10.15468/dl.t9v3gj>
2. GBIF.org (22nd January 2016) GBIF Occurrence Download. Anura. doi:<http://doi.org/10.15468/dl.4ubnux>
3. GBIF.org (22nd January 2016) GBIF Occurrence Download. Aves. doi:<http://doi.org/10.15468/dl.vcrhgq>
4. GBIF.org (25th January 2016) GBIF Occurrence Download. Pteridophyta. doi:<http://doi.org/10.15468/dl.mdvqqe>
5. GBIF.org (25th January 2016) GBIF Occurrence Download. Magnoliophyta Cronquist, Takhtajan & W. Zimmermann, 1966. doi:<http://doi.org/10.15468/dl.bpxbrw>
6. GBIF.org (21st January 2016) GBIF Occurrence Download: Squamata Opperl, 1811. doi:<http://doi.org/10.15468/dl.g16mjq>
7. Morrone JJ (2014) Biogeographical regionalisation of the Neotropical region. *Zootaxa* 3782(1):1-110.
8. Edler D, Guedes T, Zizka A, Rosvall M, & Antonelli A (2016) Infomap Bioregions: Interactive mapping of biogeographical regions from species distributions. *Syst. Biol.* 66(2):197-204.
9. Vilhena DA & Antonelli A (2015) A network approach for identifying and delimiting biogeographical regions. *Nature Communications* 6.
10. Antonelli A (2017) Biogeography: Drivers of bioregionalization. *Nature Ecology & Evolution* 1:0114.
11. Olson DM, *et al.* (2001) Terrestrial Ecoregions of the World: A New Map of Life on Earth. *Bioscience* 51(11):933-938.
12. Olson DM, *et al.* (2001) Terrestrial ecoregions of the world: a new map of life on earth: a new global map of terrestrial ecoregions provides an innovative tool for conserving biodiversity. *BioScience* 51(11):933-938.
13. Neves DM, Dexter KG, Pennington RT, Bueno ML, & Oliveira-Filho AT (2015) Environmental and historical controls of floristic composition across the South American Dry Diagonal. *Journal of Biogeography* 42(8):1566-1576.
14. Töpel M, *et al.* (2017) SpeciesGeoCoder: Fast categorization of species occurrences for analyses of biodiversity, biogeography, ecology and evolution. *Systematic Biology* 66(2):145-151.
15. Team RC (2014) R: A language and environment for statistical computing. Foundation for Statistical Computing, Vienna, Austria. URL <http://www.R-project.org/>.
16. Maldonado C, *et al.* (2015) Estimating species diversity and distribution in the era of Big Data: to what extent can we trust public databases? *Global Ecology and Biogeography* 24(8):973-884.
17. Boyle B, *et al.* (2013) The taxonomic name resolution service: an online tool for automated standardization of plant names. *BMC Bioinformatics* 14:e16.
18. Zizka A, Steege Ht, Pessoa MdCR, & Antonelli A (2017) Finding needles in the haystack: where to look for rare species in the American tropics. *Ecography*.
19. Lehtonen S, *et al.* (2017) Environmentally driven extinction and opportunistic origination explain fern diversification patterns. *Scientific reports* 7(1):4831.

20. Zanne AE, *et al.* (2014) Three keys to the radiation of angiosperms into freezing environments. *Nature* 506(7486):89-92.
21. Pyron RA & Wiens JJ (2013) Large-scale phylogenetic analyses reveal the causes of high tropical amphibian diversity. *Proceedings of the Royal Society B* 280(1770):e20131622.
22. Pyron RA & Wiens JJ (2011) A large-scale phylogeny of Amphibia including over 2800 species, and a revised classification of extant frogs, salamanders, and caecilians. *Molecular Phylogenetics and Evolution* 61(2):543-583.
23. Pyron RA, Burbrink FT, & Wiens JJ (2013) A phylogeny and revised classification of Squamata, including 4161 species of lizards and snakes. *BMC Evolutionary Biology* 13(1):e93.
24. Jetz W, Thomas GH, Joy JB, & Mooers AO (2012) The global diversity of birds in space and time. *Nature* 491(7424):444-448.
25. Rolland J, Condamine FL, Jiguet F, & Morlon H (2014) Faster speciation and reduced extinction in the tropics contribute to the Mammalian latitudinal diversity gradient. *PLoS Biology* 12(1):e1001775.
26. Kuhn TS, Mooers A, & Givnish GH (2011) A simple polytomy resolver for dated phylogenies. *Methods in Ecology and Evolution* 2(5):427-436.
27. Fritz SA, Bininda-Emonds ORP, & Purvis A (2009) Geographical variation in predictors of mammalian extinction risk: big is bad, but only in the tropics. *Ecology Letters* 12(6):538-549.
28. Bininda-Emonds ORP, *et al.* (2007) The delayed rise of present-day mammals. *Nature* 446(7135):507-512.
29. Ree RH, Moore BR, Webb CO, & Donoghue MJ (2005) A likelihood framework for inferring the evolution of geographic ranges on phylogenetic trees. *Evolution* 59(11):2299-2311.
30. Matzke N (2013) Probabilistic historical biogeography: new models for founder-event speciation, imperfect detection, and fossils allow improved accuracy and model-testing. *Frontiers in Biogeography* 26(4-5):242-248.
31. Tripp EA & McDade LA (2014) A Rich Fossil Record Yields Calibrated Phylogeny for Acanthaceae (Lamiales) and Evidence for Marked Biases in Timing and Directionality of Intercontinental Disjunctions. *Syst. Biol.* 63(5):660-684.
32. Antonelli A, *et al.* (2015) An engine for global plant diversity: highest evolutionary turnover and emigration in the American tropics. *Frontiers in Genetics* 6:e130.
33. Silvestro D, Schnitzler J, & Zizka G (2011) A Bayesian framework to estimate diversification rates and their variation through time and space. *BMC Evolutionary Biology* 11(2):e311.
34. Rue H, Martino S, & Chopin N (2009) Approximate Bayesian inference for latent Gaussian models by using integrated nested Laplace approximations. *J. Roy. Stat. Soc. Ser. B. (Stat. Method.)* 71(2):319-392.
35. Martins TG, Simpson D, Lindgren F, & Rue H (2013) Bayesian computing with INLA: New features. *Comput. Stat. Data Anal.* 67:68-83.
36. Zuur AF, Ieno EN, & Saveliev AA (2017) *Beginner's Guide to Spatial, Temporal and Spatial-Temporal Ecological Data Analysis with R-INLA* (Highland Statistics Ltd).
37. Daru BH, *et al.* (2018) Widespread sampling biases in herbaria revealed from large-scale digitization. *New Phytol.* 217(2):939-955.

38. Meyer C, Weigelt P, & Kreft H (2016) Multidimensional biases, gaps and uncertainties in global plant occurrence information. *Ecol. Lett.* 19(8):992-1006.
39. Guedes TB, *et al.* (2018) Patterns, biases and prospects in the distribution and diversity of Neotropical snakes. *Global Ecol. Biogeogr.* 27(1):14-21.
40. Merckx VFT, *et al.* (2015) Evolution of endemism on a young tropical mountain. *Nature* 524:347-350.
41. Eva HD, *et al.* (2004) A land cover map of South America. *Global Change Biology* 10(5):731-744.
42. Jetz W & Fine PV (2012) Global gradients in vertebrate diversity predicted by historical area-productivity dynamics and contemporary environment. *PLoS Biol.* 10(3):e1001292.
43. Fine PV & Ree RH (2006) Evidence for a time-integrated species-area effect on the latitudinal gradient in tree diversity. *The american naturalist* 168(6):796-804.
44. Donoghue MJ & Edwards EJ (2014) Biome Shifts and Niche Evolution in Plants. *Annu. Rev. Ecol. Syst.* 45(1):547-572.
45. Jaramillo C & Cárdenas A (2013) Global warming and Neotropical rainforests: a historical perspective. *Annual Review of Earth and Planetary Sciences* 41:741-766.
46. Valente L, Etienne RS, & Dávalos LM (2017) Recent extinctions disturb path to equilibrium diversity in Caribbean bats. *Nature Ecology & Evolution* 1:0026.
